# Supplementary material for: A DNA hypermethylation module for the stem/progenitor cell signature of cancer
Source: HighWire-hosted journal article supplement (doi:10.1101/gr.131169.111), 2012-03-05
Supplement: Table_S1.xlsx [file Table_S1.xlsx]

## Sheet: Infinium Data
ProbeID	GeneName	Gene.CpGi.Status	Probe.Location	H1ES	OSTB	MSC	NC5A	X184D	X240L	X96R	X122L	X153L	PRECP6	HBECP8	U20S	Kasumi.1	MCF10A	HT1080	MCF7	MDA.MB.468	T47D	SW480	SW620	SW48	RKO	H1299	H249	A549	H23	H157	U1752	H520	H460	H2170	H2122	H1385	COLO320	COLO205	LOVO	HT29	CACO2	DLD1	PL45	MIA	PANC1	CAPAN1	HCT116	MDA.MB.231	H838
cg00015770	QRFPR	Pure Island	Within	0.13	0.11	0.12	0.05	0.04	0.07	0.06	0.06	0.04	0.04	0.12	0.07	0.9	0.06	0.73	0.79	0.19	0.39	0.87	0.72	0.84	0.84	0.41	0.06	0.14	0.83	0.58	0.51	0.9	0.2	0.63	0.42	0.24	0.87	0.88	0.77	0.83	0.78	0.92	0.9	0.89	0.54	0.84	0.88	0.75	0.17
cg00024396	ELOVL5	Pure Island	Within	0.18	0.17	0.11	0.09	0.05	0.07	0.06	0.07	0.07	0.12	0.05	0.07	0.08	0.5	0.45	0.4	0.24	0.1	0.14	0.24	0.83	0.89	0.03	0.02	0.03	0.32	0.14	0.03	0.1	0.07	0.04	0.09	0.17	0.05	0.48	0.44	0.8	0.44	0.95	0.06	0.29	0.06	0.31	0.49	0.05	0.06
cg00044245	EPHA7	Pure Island	Within	0.13	0.14	0.08	0.04	0.04	0.05	0.05	0.05	0.05	0.04	0.14	0.84	0.07	0.27	0.78	0.09	0.65	0.08	0.72	0.67	0.72	0.74	0.1	0.03	0.15	0.04	0.03	0.06	0.03	0.05	0.03	0.04	0.03	0.04	0.82	0.82	0.77	0.75	0.73	0.11	0.27	0.04	0.85	0.79	0.08	0.71
cg00050312	PRKCA	Pure Island	Within	0.05	0.07	0.02	0.02	0.04	0.03	0.03	0.03	0.04	0.02	0.04	0.02	0.03	0.03	0.07	0.04	0.05	0.03	0.06	0.04	0.04	0.06	0.01	0.01	0.01	0.02	0.03	0.01	0.01	0.01	0.02	0.01	0.01	0.01	0.02	0.02	0.03	0.02	0.02	0.02	0.03	0.03	0.02	0.08	0.03	0.03
cg00071998	MSH5	Pure Island	Within	0.06	0.05	0.07	0.21	0.08	0.09	0.08	0.08	0.08	0.12	0.05	0.03	0.04	0.05	0.1	0.06	0.07	0.06	0.11	0.08	0.04	0.05	0.03	0.91	0.04	0.04	0.03	0.11	0.06	0.03	0.05	0.03	0.19	0.03	0.04	0.04	0.1	0.05	0.06	0.09	0.07	0.05	0.04	0.08	0.1	0.06
cg00076645	UBTD2	Pure Island	Within	0.06	0.06	0.04	0.15	0.06	0.08	0.08	0.07	0.09	0.23	0.04	0.05	0.05	0.04	0.11	0.15	0.11	0.12	0.08	0.09	0.07	0.48	0.09	0.24	0.02	0.05	0.11	0.06	0.04	0.03	0.05	0.05	0.12	0.06	0.36	0.72	0.18	0.04	0.08	0.45	0.07	0.06	0.03	0.46	0.38	0.06
cg00078194	MDK	Pure Island	Within	0.07	0.07	0.04	0.06	0.05	0.04	0.04	0.04	0.04	0.03	0.03	0.06	0.25	0.03	0.28	0.05	0.09	0.13	0.08	0.06	0.08	0.06	0.02	0.02	0.6	0.02	0.04	0.02	0.02	0.02	0.03	0.03	0.98	0.08	0.02	0.02	0.06	0.02	0.03	0.03	0.99	0.04	0.03	0.12	0.08	0.03
cg00079563	ARFGAP3	Pure Island	Within	0.11	0.1	0.05	0.01	0.03	0.03	0.03	0.02	0.03	0.03	0.04	0.86	0.33	0.11	0.63	0.17	0.69	0.42	0.73	0.66	0.21	0.87	0.12	0.58	0.4	0.31	0.02	0.67	0.08	0.02	0.07	0.29	0.32	0.02	0.03	0.33	0.6	0.02	0.92	0.24	0.96	0.05	0.17	0.65	0.4	0.02
cg00081975	ABCC3	Pure Island	Within	0.04	0.04	0.04	0.02	0.03	0.03	0.02	0.02	0.03	0.01	0.02	0.03	0.44	0.02	0.12	0.04	0.04	0.04	0.06	0.05	0.04	0.96	0.48	0.06	0.02	0.03	0.05	0.02	0.02	0.02	0.02	0.02	0.01	0.04	0.02	0.01	0.05	0.03	0.02	0.05	0.05	0.02	0.02	0.05	0.05	0.03
cg00096922	DLX5	Pure Island	Within	0.1	0.07	0.04	0.25	0.08	0.08	0.06	0.07	0.09	0.19	0.09	0.9	0.81	0.28	0.18	0.12	0.17	0.08	0.35	0.18	0.83	0.89	0.05	0.02	0.07	0.03	0.04	0.11	0.03	0.03	0.03	0.85	0.2	0.04	0.85	0.87	0.74	0.24	0.77	0.9	0.05	0.26	0.09	0.46	0.73	0.51
cg00126034	WNT3	Pure Island	Within	0.06	0.09	0.04	0.09	0.16	0.08	0.09	0.07	0.08	0.08	0.06	0.44	0.05	0.18	0.25	0.17	0.55	0.06	0.32	0.09	0.86	0.83	0.4	0.02	0.93	0.05	0.95	0.91	0.02	0.03	0.06	0.36	0.18	0.1	0.94	0.44	0.84	0.91	0.95	0.23	0.95	0.43	0.3	0.87	0.1	0.42
cg00133909	CD276	Pure Island	Within	0.05	0.03	0.05	0.04	0.09	0.07	0.06	0.07	0.08	0.07	0.1	0.05	0.04	0.04	0.03	0.05	0.06	0.04	0.04	0.03	0.02	0.02	0.02	0.02	0.02	0.03	0.06	0.02	0.02	0.02	0.02	0.02	0.02	0.03	0.04	0.06	0.04	0.05	0.03	0.04	0.03	0.06	0.04	0.06	0.09	0.04
cg00149976	MGLL	Pure Island	Within	0.12	0.09	0.06	0.03	0.04	0.04	0.04	0.04	0.04	0.03	0.04	0.5	0.05	0.04	0.78	0.08	0.07	0.06	0.1	0.12	0.12	0.1	0.08	0.03	0.03	0.03	0.03	0.04	0.05	0.03	0.05	0.12	0.14	0.18	0.04	0.39	0.07	0.04	0.03	0.05	0.03	0.04	0.04	0.13	0.07	0.04
cg00155609	PRDX2	Pure Island	Within	0.08	0.1	0.1	0.03	0.04	0.03	0.03	0.03	0.03	0.03	0.09	0.06	0.66	0.04	0.12	0.08	0.12	0.06	0.1	0.11	0.09	0.11	0.51	0.03	0.73	0.04	0.84	0.03	0.04	0.03	0.03	0.04	0.03	0.04	0.08	0.07	0.07	0.06	0.06	0.12	0.07	0.07	0.07	0.12	0.06	0.11
cg00164041	HERC5	Pure Island	Within	0.17	0.13	0.12	0.08	0.05	0.03	0.03	0.04	0.04	0.03	0.17	0.6	0.09	0.18	0.17	0.2	0.09	0.07	0.12	0.12	0.44	0.65	0.02	0.03	0.04	0.04	0.25	0.02	0.03	0.03	0.03	0.03	0.03	0.08	0.31	0.39	0.17	0.29	0.11	0.12	0.1	0.16	0.08	0.09	0.07	0.04
cg00164898	MAPK11	Pure Island	Within	0.24	0.15	0.17	0.07	0.04	0.05	0.04	0.04	0.04	0.03	0.09	0.14	0.06	0.08	0.22	0.13	0.09	0.07	0.15	0.14	0.42	0.12	0.04	0.03	0.18	0.07	0.08	0.06	0.14	0.14	0.08	0.23	0.04	0.29	0.09	0.12	0.31	0.2	0.09	0.12	0.22	0.12	0.13	0.17	0.22	0.06
cg00167504	BLVRA	Pure Island	Within	0.03	0.05	0.02	0.03	0.06	0.06	0.05	0.05	0.05	0.04	0.03	0.02	0.03	0.03	0.04	0.04	0.04	0.03	0.05	0.04	0.03	0.04	0.02	0.02	0.02	0.03	0.02	0.02	0.02	0.02	0.03	0.02	0.02	0.03	0.03	0.02	0.06	0.03	0.02	0.03	0.02	0.03	0.02	0.1	0.06	0.04
cg00183916	HS3ST3B1	Pure Island	Within	0.05	0.03	0.03	0.02	0.03	0.03	0.03	0.03	0.03	0.02	0.16	0.73	0.05	0.03	0.07	0.04	0.36	0.04	0.14	0.07	0.86	0.42	0.03	0.03	0.08	0.04	0.02	0.29	0.02	0.02	0.03	0.02	0.01	0.03	0.03	0.03	0.27	0.05	0.68	0.09	0.08	0.03	0.65	0.85	0.06	0.59
cg00185839	LRDD	Pure Island	Within	0.14	0.09	0.03	0.05	0.07	0.06	0.05	0.06	0.06	0.03	0.03	0.04	0.03	0.04	0.83	0.06	0.06	0.06	0.1	0.04	0.06	0.06	0.03	0.02	0.02	0.04	0.04	0.03	0.03	0.03	0.04	0.02	0.05	0.02	0.02	0.02	0.04	0.02	0.03	0.03	0.02	0.04	0.03	0.05	0.13	0.04
cg00194146	GFOD1	Pure Island	Within	0.2	0.16	0.15	0.09	0.09	0.08	0.07	0.05	0.07	0.14	0.06	0.9	0.4	0.34	0.91	0.31	0.1	0.1	0.22	0.26	0.9	0.89	0.59	0.04	0.65	0.35	0.33	0.18	0.5	0.5	0.06	0.23	0.86	0.44	0.25	0.91	0.11	0.7	0.09	0.53	0.92	0.11	0.3	0.72	0.87	0.16
cg00202702	C11orf70	Pure Island	Within	0.05	0.05	0.03	0.04	0.03	0.03	0.03	0.02	0.02	0.04	0.05	0.04	0.93	0.03	0.34	0.09	0.09	0.07	0.14	0.09	0.84	0.88	0.02	0.01	0.02	0.36	0.02	0.02	0.02	0.02	0.03	0.33	0.02	0.05	0.03	0.19	0.17	0.07	0.21	0.05	0.03	0.03	0.02	0.75	0.05	0.03
cg00240312	CDH1	Pure Island	Within	0.05	0.09	0.08	0.02	0.02	0.03	0.03	0.04	0.03	0.01	0.03	0.96	0.96	0.03	0.57	0.04	0.06	0.04	0.12	0.15	0.07	0.95	0.22	0.43	0.04	0.03	0.04	0.07	0.03	0.44	0.02	0.85	0.02	0.03	0.03	0.03	0.04	0.03	0.03	0.15	0.98	0.03	0.03	0.09	0.1	0.33
cg00240432	TWIST1	Pure Island	Within	0.09	0.05	0.05	0.23	0.04	0.04	0.04	0.05	0.04	0.03	0.03	0.93	0.06	0.04	0.22	0.37	0.1	0.38	0.85	0.86	0.88	NA	0.05	0.01	0.03	0.87	0.05	0.09	0.02	0.81	0.04	0.91	0.06	0.89	0.91	0.93	0.86	0.89	0.84	0.91	0.94	0.89	0.87	0.76	0.87	0.26
cg00243313	IRX4	Pure Island	Within	0.07	0.06	0.05	0.11	0.02	0.03	0.02	0.03	0.02	0.03	0.05	0.78	0.91	0.06	0.26	0.07	0.46	0.04	0.87	0.86	0.89	0.86	0.19	0.07	0.05	0.02	0.02	0.23	0.03	0.02	0.26	0.03	0.02	0.1	0.9	0.73	0.86	0.91	0.93	0.59	0.9	0.45	0.76	0.06	0.68	0.6
cg00247489	CR2	Pure Island	Within	0.08	0.06	0.03	0.14	0.04	0.05	0.04	0.04	0.04	0.04	0.13	0.29	0.34	0.04	0.13	0.17	0.05	0.03	0.05	0.35	0.91	0.85	0.06	0.02	0.03	0.02	0.06	0.11	0.02	0.03	0.02	0.31	0.08	0.04	0.29	0.04	0.61	0.04	0.04	0.73	0.31	0.06	0.68	0.07	0.06	0.08
cg00256281	PMM1	Pure Island	Within	0.04	0.04	0.03	0.01	0.03	0.03	0.03	0.03	0.03	0.01	0.02	0.02	0.02	0.05	0.04	0.03	0.04	0.03	0.24	0.07	0.07	0.03	0.02	0.01	0.02	0.02	0.02	0.01	0.02	0.01	0.02	0.02	0.02	0.02	0.02	0.83	0.04	0.02	0.02	0.05	0.02	0.02	0.02	0.06	0.15	0.03
cg00261781	MATN3	Pure Island	Within	0.11	0.12	0.05	0.02	0.04	0.03	0.02	0.02	0.02	0.01	0.02	0.05	0.06	0.03	0.51	0.06	0.11	0.08	0.09	0.14	0.1	0.9	0.42	0.44	0.03	0.03	0.02	0.03	0.02	0.02	0.02	0.04	0.02	0.93	0.03	0.02	0.05	0.04	0.03	0.07	0.51	0.02	0.02	0.73	0.08	0.02
cg00263760	VAX1	Pure Island	Within	0.06	0.07	0.04	0.04	0.07	0.1	0.07	0.07	0.07	0.02	0.05	0.89	0.94	0.81	0.5	0.9	0.41	0.89	0.83	0.46	0.92	0.92	0.15	0.03	0.03	0.94	0.03	0.06	0.03	0.03	0.05	0.07	0.26	0.14	0.96	0.92	0.87	0.62	0.95	0.79	0.94	0.04	0.92	0.86	0.37	0.03
cg00275232	ZNF296	Pure Island	Within	0.05	0.07	0.04	0.06	0.05	0.04	0.07	0.05	0.05	0.03	0.02	0.35	0.03	0.03	0.96	0.05	0.05	0.04	0.07	0.06	0.07	0.07	0.01	0.03	0.01	0.03	0.05	0.02	0.03	0.02	0.02	0.02	0.97	0.03	0.03	0.03	0.03	0.04	0.03	0.03	0.04	0.07	0.03	0.07	0.05	0.03
cg00290506	CNIH3	Pure Island	Within	0.1	0.12	0.04	0.04	0.03	0.02	0.03	0.03	0.02	0.03	0.02	0.59	0.15	0.59	0.18	0.06	0.08	0.68	0.81	0.18	0.91	0.91	0.04	0.31	0.23	0.36	0.03	0.11	0.03	0.26	0.04	0.54	0.02	0.13	0.98	0.96	0.94	0.03	0.96	0.97	0.38	0.41	0.98	0.8	0.89	0.95
cg00293409	LRRC33	Pure Island	Within	0.21	0.1	0.08	0.05	0.06	0.06	0.07	0.07	0.06	0.05	0.1	0.53	0.08	0.26	0.32	0.84	0.11	0.08	0.54	0.1	0.85	0.87	0.55	0.05	0.58	0.82	0.82	0.17	0.25	0.1	0.18	0.67	0.05	0.73	0.48	0.56	0.84	0.55	0.41	0.27	0.13	0.1	0.38	0.72	0.12	0.06
cg00303548	HS6ST3	Pure Island	Within	0.06	0.11	0.03	0.11	0.03	0.02	0.02	0.03	0.02	0.01	0.02	0.03	0.63	0.02	0.13	0.05	0.04	0.05	0.08	0.06	0.93	0.93	0.01	0.01	0.02	0.02	0.05	0.02	0.02	0.01	0.02	0.02	0.04	0.02	0.46	0.04	0.04	0.04	0.03	0.94	0.03	0.04	0.02	0.06	0.04	0.02
cg00308133	GAMT	Pure Island	Within	0.12	0.02	0.03	0.01	0.04	0.02	0.04	0.03	0.03	0.01	0.08	0.02	0.02	0.77	0.22	0.46	0.15	0.02	0.63	0.04	0.97	0.97	0.02	0.01	0.03	0.02	0.01	0.02	0.22	0.01	0.03	0.55	0.02	0.01	0.52	0.99	0.72	0.01	0.74	0.98	0.51	0.02	0.02	0.04	0.04	0.12
cg00318573	CHRNA4	Pure Island	Within	0.21	0.19	0.17	0.06	0.11	0.1	0.19	0.09	0.06	0.15	0.18	0.48	0.95	0.33	0.87	0.9	0.92	0.8	0.76	0.38	0.93	0.93	0.65	0.49	0.65	0.96	0.86	0.65	0.41	0.4	0.18	0.5	0.09	0.05	0.57	0.97	0.89	0.96	0.97	0.75	0.98	0.46	0.95	0.92	0.87	0.5
cg00332745	NOL3	Associated Island	Within	0.07	0.09	0.04	0.03	0.03	0.04	0.03	0.04	0.03	0.04	0.04	0.67	0.04	0.04	0.35	0.05	0.06	0.06	0.09	0.05	0.06	0.08	0.04	0.02	0.02	0.03	0.03	0.02	0.02	0.03	0.03	0.03	0.03	0.36	0.03	0.04	0.1	0.06	0.03	0.04	0.04	0.05	0.03	0.06	0.08	0.03
cg00333226	VWC2	Pure Island	Within	0.1	0.11	0.1	0.03	0.06	0.06	0.07	0.06	0.06	0.03	0.17	0.38	0.92	0.67	0.36	0.86	0.75	0.33	0.83	0.77	0.89	0.92	0.66	0.07	0.94	0.86	0.08	0.62	0.05	0.16	0.1	0.28	0.7	0.93	0.94	0.94	0.87	0.93	0.92	0.92	0.92	0.91	0.89	0.8	0.83	0.84
cg00351011	LASS4	Pure Island	Within	0.15	0.2	0.07	0.03	0.03	0.03	0.03	0.03	0.03	0.02	0.04	0.07	0.05	0.25	0.29	0.08	0.14	0.1	0.13	0.19	0.89	0.93	0.02	0.02	0.02	0.03	0.02	0.03	0.02	0.03	0.06	0.08	0.02	0.03	0.92	0.88	0.48	0.04	0.95	0.9	0.04	0.04	0.9	0.04	0.06	0.03
cg00381076	C18orf54	Associated Island	Within	0.07	0.05	0.06	0.02	0.06	0.04	0.05	0.06	0.05	0.02	0.09	0.03	0.04	0.1	0.08	0.1	0.09	0.05	0.12	0.06	0.94	0.08	0.02	0.02	0.03	0.05	0.02	0.02	0.03	0.02	0.04	0.02	0.01	0.03	0.03	0.08	0.05	0.08	0.04	0.48	0.06	0.06	0.05	0.37	0.09	0.04
cg00386408	TGFBI	Pure Island	Within	0.16	0.09	0.06	0.24	0.03	0.04	0.04	0.04	0.03	0.05	0.02	0.95	0.91	0.03	0.91	0.27	0.86	0.15	0.15	0.2	0.83	0.92	0.37	0.93	0.02	0.72	0.95	0.02	0.41	0.01	0.18	0.75	0.89	0.86	0.03	0.06	0.07	0.06	0.11	0.24	0.8	0.06	0.75	0.85	0.47	0.02
cg00405677	HAND1	Pure Island	Within	0.04	0.08	0.05	NA	0.09	0.1	0.06	0.07	0.08	0.12	0.07	0.61	0.49	0.39	0.21	0.78	0.27	0.24	0.59	0.52	0.65	0.74	0.42	0.33	0.13	0.87	0.65	0.44	0.28	0.06	0.07	0.24	0.34	0.07	0.93	0.33	0.67	0.94	0.91	0.51	0.95	0.09	0.87	0.78	0.08	0.54
cg00422913	C17orf91	Pure Island	Within	0.07	0.07	0.05	0.05	0.05	0.06	0.05	0.04	0.04	0.07	0.03	0.06	0.15	0.04	0.08	0.06	0.1	0.07	0.07	0.1	0.08	0.06	0.03	0.04	0.04	0.05	0.04	0.03	0.3	0.03	0.04	0.04	0.03	0.1	0.04	0.04	0.07	0.04	0.05	0.05	0.04	0.05	0.05	0.07	0.07	0.05
cg00465284	LRRTM1	Pure Island	Within	0.05	0.09	0.04	0.2	0.05	0.05	0.04	0.05	0.07	0.08	0.06	0.46	0.39	0.11	0.11	0.7	0.49	0.05	0.53	0.29	NA	NA	0.08	0.02	0.78	0.63	0.04	0.58	0.01	0.02	0.07	0.22	0.04	0.03	0.04	0.7	0.82	0.67	0.83	0.86	0.91	0.85	0.91	0.84	0.08	0.39
cg00472814	ADAMTS1	Pure Island	Within	0.05	0.06	0.04	0.07	0.03	0.03	0.03	0.03	0.03	0.04	0.06	0.94	0.04	0.04	0.8	0.09	0.05	0.92	0.87	0.87	0.89	0.93	0.03	0.13	0.03	0.45	0.03	0.26	0.03	0.02	0.03	0.03	0.87	0.03	0.95	0.83	0.83	0.96	0.95	0.93	0.9	0.03	0.48	0.88	0.09	0.33
cg00485296	NME3	Pure Island	Within	0.05	0.05	0.02	0.02	0.02	0.02	0.02	0.02	0.02	0.01	0.01	0.04	0.03	0.02	0.52	0.13	0.04	0.03	0.06	0.06	0.05	0.05	0.01	0.01	0.02	0.33	0.02	0.01	0.23	0.01	0.02	0.02	0.02	0.01	0.02	0.12	0.06	0.96	0.01	0.02	0.02	0.02	0.02	0.06	0.05	0.02
cg00512279	SLC18A2	Pure Island	Within	0.05	0.05	0.03	0.12	0.02	0.03	0.03	0.03	0.02	0.03	0.02	0.67	0.03	0.38	0.12	0.74	0.62	0.07	0.84	0.75	0.77	0.83	0.37	0.02	0.65	0.87	0.46	0.28	0.02	0.23	0.28	0.8	0.31	0.05	0.95	0.93	0.85	0.9	0.9	0.92	0.95	0.92	0.93	0.84	0.84	0.07
cg00512374	IGFBP4	Pure Island	Within	0.06	0.05	0.03	0.01	0.06	0.06	0.06	0.07	0.06	0.03	0.04	0.72	0.02	0.19	0.96	0.05	0.06	0.05	0.04	0.05	0.04	0.96	0.03	0.02	0.02	0.03	0.03	0.02	0.14	0.02	0.04	0.02	0.02	0.03	0.02	0.07	0.05	0.02	0.02	0.04	0.05	0.03	0.02	0.94	0.06	0.04
cg00547789	RAB39B	Pure Island	Within	0.19	0.17	0.07	0.07	0.19	0.16	0.17	0.15	0.14	0.13	0.08	0.07	0.06	0.21	0.2	0.16	0.21	0.12	0.14	0.17	0.85	0.84	0.1	0.03	0.04	0.19	0.04	0.1	0.02	0.03	0.03	0.04	0.03	0.04	0.85	0.88	0.81	0.63	0.89	0.88	0.07	0.06	0.91	0.78	0.66	0.78
cg00554682	ZNF804A	Associated Island	Within	0.08	0.07	0.06	0.03	0.06	0.05	0.04	0.06	0.05	0.03	0.03	0.42	0.05	0.05	0.21	0.07	0.42	0.07	0.32	0.42	0.8	0.83	0.06	0.04	0.05	0.05	0.04	0.09	0.05	0.04	0.05	0.05	0.03	0.24	0.68	0.74	0.56	0.76	0.83	0.8	0.05	0.05	0.81	0.18	0.09	0.24
cg00563229	XKR8	Pure Island	Within	0.05	0.06	0.02	0.08	0.03	0.03	0.03	0.03	0.02	0.06	0.02	0.92	0.03	0.03	0.06	0.06	0.06	0.1	0.06	0.09	0.05	0.09	0.01	0.97	0.01	0.03	0.02	0.01	0.01	0.01	0.02	0.38	0.06	0.22	0.02	0.03	0.02	0.04	0.03	0.04	0.93	0.03	0.02	0.04	0.03	0.3
cg00566759	DSC2	Pure Island	Within	0.08	0.07	0.06	0.08	0.03	0.04	0.04	0.04	0.04	0.09	0.06	0.09	0.4	0.06	0.53	0.17	0.1	0.07	0.26	0.16	0.08	0.72	0.12	0.09	0.03	0.15	0.05	0.05	0.04	0.03	0.03	0.17	0.04	0.59	0.07	0.08	0.11	0.08	0.04	0.07	0.64	0.06	0.07	0.08	0.08	0.07
cg00625653	WNT7A	Pure Island	Within	0.08	0.09	0.05	0.04	0.04	0.05	0.05	0.05	0.05	0.03	0.05	0.62	0.89	0.05	0.46	0.88	0.24	0.07	0.11	0.34	0.89	0.9	0.06	0.03	0.04	0.92	0.04	0.05	0.04	0.04	0.1	0.19	0.42	0.05	0.94	0.86	0.85	0.82	0.93	0.3	0.9	0.06	0.86	0.14	0.84	0.1
cg00638514	OTOP3	Pure Island	Within	0.13	0.1	0.04	0.07	0.04	0.03	0.04	0.03	0.03	0.03	0.1	0.39	0.94	0.72	0.17	0.92	0.46	0.31	0.86	0.14	0.9	0.9	0.95	0.02	0.95	0.94	0.97	0.94	0.48	0.92	0.05	0.95	0.02	0.12	0.95	0.94	0.88	0.94	0.92	0.17	0.96	0.9	0.88	0.89	0.92	0.92
cg00646140	ARSD	Pure Island	Within	0.12	0.15	0.12	0.03	0.04	0.06	0.04	0.05	0.04	0.03	0.11	0.91	0.05	0.39	0.34	0.06	0.09	0.05	0.6	0.13	0.08	0.08	0.17	0.11	0.03	0.03	0.03	0.25	0.06	0.04	0.05	0.17	0.97	0.05	0.04	0.04	0.07	0.95	0.03	0.13	0.05	0.04	0.03	0.06	0.08	0.07
cg00654814	MGAT5B	Pure Island	Within	0.2	0.16	0.15	0.12	0.14	0.14	0.12	0.14	0.1	0.07	0.07	0.62	0.64	0.11	0.17	0.17	0.77	0.16	0.71	0.26	0.93	0.92	0.09	0.07	0.08	0.43	0.11	0.11	0.1	0.1	0.18	0.32	0.14	0.12	0.96	0.96	0.93	0.61	0.96	0.97	0.93	0.11	0.4	0.84	0.95	0.07
cg00687686	NDRG4	Pure Island	Within	0.07	0.07	0.05	0.06	0.06	0.06	0.06	0.07	0.07	0.04	0.06	0.86	0.56	0.86	0.65	0.85	0.82	0.5	0.74	0.85	0.84	0.88	0.52	0.06	0.64	0.91	0.31	0.39	0.24	0.43	0.11	0.8	0.51	0.15	0.92	0.94	0.88	0.78	0.91	0.91	0.92	0.13	0.83	0.8	0.85	0.47
cg00704310	KCTD15	Pure Island	Within	0.05	0.05	0.03	0.05	0.08	0.08	0.05	0.07	0.08	0.09	0.05	0.03	0.04	0.03	0.04	0.05	0.06	0.06	0.08	0.05	0.05	0.04	0.03	0.03	0.03	0.04	0.04	0.03	0.02	0.03	0.03	0.03	0.08	0.03	0.03	0.03	0.06	0.03	0.04	0.06	0.04	0.04	0.03	0.09	0.59	0.03
cg00718440	CDKN2A	Pure Island	Within	0.12	0.06	0.13	0.09	0.03	0.04	0.04	0.04	0.03	0.01	0.11	0.86	0.06	0.44	0.43	0.09	0.06	0.06	0.07	0.09	0.1	0.15	0.03	0.03	0.42	0.03	0.05	0.02	0.03	0.56	0.52	0.46	0.04	0.09	0.15	0.14	0.07	0.14	0.1	0.16	0.54	0.57	0.64	0.05	NA	NA
cg00718748	ZNF624	Pure Island	Within	0.06	0.06	0.05	0.03	0.04	0.04	0.04	0.04	0.04	0.04	0.03	0.05	0.05	0.04	0.05	0.09	0.08	0.04	0.08	0.06	0.05	0.04	0.03	0.03	0.03	0.04	0.03	0.03	0.03	0.03	0.03	0.03	0.03	0.03	0.05	0.05	0.05	0.05	0.03	0.05	0.04	0.04	0.04	0.09	0.06	0.03
cg00755043	NXNL2	Pure Island	Within	0.07	0.08	0.07	0.13	0.05	0.06	0.05	0.04	0.04	0.09	0.03	0.15	0.91	0.03	0.85	0.06	0.1	0.06	0.17	0.14	0.29	0.76	0.04	0.06	0.02	0.04	0.06	0.03	0.04	0.05	0.04	0.03	0.05	0.15	0.89	0.05	0.72	0.05	0.75	0.03	0.9	0.08	0.03	0.08	0.05	0.21
cg00756058	DZIP1	Pure Island	Within	0.04	0.04	0.04	0.04	0.03	0.02	0.02	0.02	0.02	0.02	0.01	0.03	0.51	0.02	0.05	0.92	0.07	0.93	0.5	0.79	0.93	0.93	0.22	0.04	0.01	0.97	0.02	0.01	0.02	0.02	0.02	0.97	0.02	0.87	0.98	0.97	0.94	0.23	0.96	0.97	0.98	0.03	0.01	0.81	0.24	0.01
cg00769520	ST8SIA1	Pure Island	Within	0.06	0.05	0.04	0.05	0.03	0.04	0.03	0.04	0.03	0.05	0.03	0.04	0.04	0.05	0.06	0.06	0.06	0.04	0.69	0.41	0.86	0.89	0.03	0.03	0.03	0.03	0.02	0.06	0.03	0.03	0.03	0.03	0.03	0.02	0.52	0.27	0.79	0.84	0.88	0.39	0.89	0.05	0.9	0.75	0.09	0.1
cg00775197	TCTE1	Pure Island	Within	0.13	0.18	0.1	0.06	0.05	0.05	0.05	0.05	0.04	0.05	0.25	0.85	0.68	0.24	0.62	0.13	0.34	0.09	0.29	0.44	0.83	0.88	0.36	0.18	0.48	0.07	0.81	0.45	0.22	0.07	0.11	0.83	0.3	0.17	0.92	0.88	0.85	0.65	0.92	0.84	0.44	0.26	0.48	0.8	0.52	0.19
cg00777121	RASSF1	Pure Island	Within	0.04	0.06	0.05	0.07	0.06	0.09	0.06	0.05	0.05	0.07	0.16	0.85	0.07	0.62	0.91	0.89	0.91	0.9	0.06	0.06	0.93	0.93	0.66	0.91	0.93	0.93	0.95	0.96	0.93	0.93	0.05	0.93	0.97	0.93	0.08	0.52	0.06	0.87	0.84	0.74	0.93	0.49	0.04	0.09	0.89	0.95
cg00807586	DLEC1	Pure Island	Within	0.07	0.14	0.12	0.12	0.18	0.16	0.15	0.12	0.2	0.16	0.09	0.68	0.18	0.68	0.51	0.8	0.73	0.62	0.16	0.61	0.83	0.88	0.26	0.04	0.88	0.87	0.9	0.5	0.86	0.1	0.04	0.82	0.83	0.93	0.88	0.75	0.75	0.05	0.87	0.82	0.84	0.82	0.08	0.69	0.2	0.81
cg00810473	SNX22	Pure Island	Within	0.03	0.07	0.03	0.06	0.04	0.04	0.07	0.04	0.03	0.03	0.05	0.3	0.03	0.06	0.15	0.04	0.04	0.03	0.06	0.07	0.45	0.93	0.01	0.01	0.01	0.02	0.03	0.01	0.01	0.1	0.03	0.01	0.01	0.03	0.02	0.03	0.05	0.03	0.77	0.03	0.97	0.03	0.03	0.03	0.05	0.03
cg00818693	TTC14	Pure Island	Within	0.06	0.04	0.06	0.03	0.04	0.03	0.03	0.04	0.03	0.03	0.07	0.04	0.43	0.07	0.06	0.32	0.14	0.05	0.08	0.09	0.85	0.41	0.05	0.05	0.04	0.23	0.02	0.05	0.04	0.04	0.04	0.05	0.02	0.06	0.03	0.07	0.05	0.08	0.04	0.07	0.06	0.06	0.04	0.08	0.08	0.03
cg00828602	WNT5A	Pure Island	Within	0.12	0.09	0.06	0.23	0.08	0.08	0.09	0.09	0.07	0.19	0.07	0.33	0.9	0.07	0.09	0.17	0.15	0.08	0.08	0.42	0.84	0.87	0.19	0.05	0.13	0.12	0.08	0.16	0.05	0.05	0.05	0.05	0.23	0.06	0.93	0.37	0.76	0.29	0.43	0.84	0.61	0.13	0.3	0.6	0.14	0.07
cg00839802	MAN1A1	Pure Island	Within	0.04	0.07	0.04	0.05	0.1	0.1	0.1	0.11	0.11	0.21	0.06	0.05	0.05	0.04	0.05	0.06	0.08	0.09	0.12	0.05	0.06	0.48	0.02	0.02	0.03	0.03	0.08	0.03	0.03	0.03	0.04	0.03	0.07	0.04	0.06	0.05	0.1	0.05	0.05	0.29	0.18	0.04	0.04	0.1	0.11	0.06
cg00848728	DAB1	Associated Island	Within	0.02	0.02	0.01	0.01	0.02	0.03	0.03	0.03	0.02	0.01	0.03	0.01	0.97	0.13	0.02	0.8	0.19	0.03	0.85	0.91	0.67	0.93	0.3	0.01	0.71	0.92	0.01	0.52	0.06	0.01	0.04	0.33	0.1	0.01	0.92	0.41	0.71	0.71	0.95	0.4	0.96	0.08	0.31	0.7	0.59	0.56
cg00858899	CCND1	Pure Island	Within	0.11	0.18	0.13	0.14	0.07	0.1	0.09	0.09	0.08	0.14	0.1	0.5	0.12	0.08	0.19	0.11	0.1	0.1	0.21	0.11	0.14	0.15	0.05	0.06	0.05	0.06	0.07	0.05	0.04	0.07	0.06	0.06	0.12	0.14	0.12	0.12	0.13	0.13	0.08	0.1	0.09	0.13	0.07	0.22	0.11	0.05
cg00876704	PKN1	Pure Island	Within	0.12	0.08	0.03	0.03	0.04	0.03	0.04	0.04	0.04	0.02	0.05	0.03	0.03	0.03	0.07	0.03	0.04	0.04	0.06	0.04	0.07	0.04	0.1	0.02	0.02	0.02	0.81	0.02	0.02	0.01	0.02	0.04	0.03	0.01	0.01	0.02	0.05	0.03	0.01	0.02	0.02	0.03	0.02	0.05	0.05	0.34
cg00877887	DUOXA2	Pure Island	Within	0.06	0.05	0.03	0.16	0.05	0.06	0.04	0.05	0.05	0.12	0.04	0.22	0.12	0.12	0.05	0.77	0.25	0.33	0.18	0.06	0.53	0.91	0.57	0.02	0.12	0.67	0.74	0.59	0.07	0.38	0.04	0.74	0.15	0.03	0.03	0.19	0.1	0.85	0.2	0.48	0.84	0.08	0.27	0.73	0.25	0.32
cg00877964	SLC1A4	Pure Island	Within	0.07	0.06	0.04	0.03	0.04	0.05	0.04	0.05	0.05	0.05	0.15	0.04	0.05	0.12	0.06	0.12	0.08	0.05	0.08	0.08	0.05	0.05	0.04	0.03	0.04	0.38	0.04	0.03	0.08	0.04	0.04	0.35	0.03	0.11	0.04	0.44	0.1	0.04	0.04	0.51	0.04	0.06	0.04	0.79	0.1	0.04
cg00886554	NMU	Pure Island	Within	0.13	0.11	0.07	0.15	0.06	0.06	0.05	0.07	0.06	0.17	0.03	0.44	0.47	0.04	0.22	0.08	0.16	0.1	0.17	0.17	0.44	0.46	0.08	0.1	0.04	0.04	0.04	0.04	0.04	0.04	0.04	0.09	0.1	0.14	0.06	0.02	0.09	0.07	0.03	0.03	0.05	0.08	0.04	0.07	0.07	0.09
cg00888007	CCND2	Pure Island	Within	0.05	0.06	0.05	0.03	0.03	0.03	0.03	0.03	0.03	0.05	0.05	0.51	0.04	0.24	0.73	0.72	0.45	0.07	0.54	0.33	0.5	0.06	0.19	0.14	0.39	0.24	0.03	0.15	0.17	0.31	0.18	0.05	0.56	0.11	0.04	0.94	0.22	0.1	0.91	0.58	0.81	0.1	0.83	0.87	0.13	0.57
cg00890257	DEGS2	Pure Island	Within	0.07	0.06	0.05	0.02	0.04	0.05	0.05	0.05	0.05	0.02	0.06	0.96	0.7	0.72	0.53	0.04	0.06	0.05	0.67	0.21	0.06	0.95	0.08	0.02	0.04	0.04	0.03	0.2	0.02	0.06	0.04	0.91	0.05	0.02	0.02	0.1	0.03	0.22	0.05	0.13	0.96	0.04	0.03	0.6	0.16	0.06
cg00892798	NGFR	Pure Island	Within	0.06	0.06	0.03	0.02	0.03	0.03	0.03	0.03	0.02	0.02	0.06	0.04	0.05	0.04	0.16	0.08	0.12	0.05	0.07	0.2	0.93	0.95	0.3	0.04	0.04	0.21	0.03	0.19	0.03	0.05	0.07	0.31	0.02	0.05	0.93	0.58	0.4	0.69	0.92	0.32	0.05	0.03	0.48	0.47	0.48	0.55
cg00893636	MLH1	Pure Island	Within	0.03	0.03	0.02	0.05	0.04	0.04	0.04	0.04	0.03	0.08	0.09	0.03	0.03	0.04	0.03	0.05	0.04	0.03	0.06	0.03	0.86	0.94	0.02	0.02	0.02	0.03	0.02	0.01	0.02	0.02	0.03	0.05	0.03	0.02	0.02	0.04	0.1	0.02	0.02	0.05	0.05	0.04	0.04	0.07	0.1	0.05
cg00899086	2011-09-11	Pure Island	Within	0.07	0.12	0.04	0.15	0.07	0.05	0.07	0.09	0.08	0.11	0.07	0.05	0.04	0.05	0.08	0.08	0.07	0.08	0.11	0.12	0.06	0.09	0.02	0.02	0.03	0.03	0.05	0.02	0.03	0.03	0.03	0.03	0.15	0.03	0.04	0.05	0.06	0.06	0.04	0.06	0.04	0.09	0.04	0.05	0.08	0.04
cg00902195	SYT10	Pure Island	Within	0.05	0.02	0.06	0.09	0.03	0.04	0.02	0.03	0.03	0.02	0.05	0.02	0.95	0.48	0.19	0.32	0.77	0.4	0.87	0.83	0.87	0.88	0.15	0.06	0.79	0.51	0.31	0.38	0.01	0.62	0.03	0.9	0.74	0.37	0.93	0.38	0.9	0.75	0.96	0.95	0.95	0.28	0.88	0.82	0.66	0.62
cg00910067	SLC7A10	Pure Island	Within	0.2	0.15	0.12	0.07	0.09	0.07	0.12	0.11	0.12	0.1	0.07	0.06	0.79	0.25	0.37	0.77	0.24	0.07	0.55	0.17	0.82	0.86	0.27	0.37	0.33	0.71	0.03	0.69	0.19	0.17	0.29	0.17	0.29	0.05	0.57	0.4	0.29	0.87	0.44	0.88	0.89	0.28	0.37	0.76	0.25	0.04
cg00915206	GAD1	Pure Island	Within	0.17	0.19	0.1	0.12	0.05	0.05	0.05	0.03	0.05	0.07	0.05	0.2	0.05	0.05	0.18	0.08	0.14	0.14	0.15	0.19	0.21	0.38	0.03	0.03	0.05	0.04	0.03	0.03	0.03	0.03	0.03	0.04	0.03	0.04	0.04	0.05	0.07	0.05	0.06	0.05	0.18	0.06	0.06	0.11	0.1	0.04
cg00950621	STARD5	Pure Island	Within	0.04	0.03	0.02	0.07	0.04	0.04	0.04	0.05	0.04	0.03	0.02	0.02	0.03	0.04	0.05	0.04	0.07	0.03	0.06	0.04	0.03	0.07	0.02	0.14	0.02	0.02	0.05	0.01	0.05	0.01	0.04	0.02	0.06	0.02	0.02	0.02	0.14	0.03	0.08	0.07	0.03	0.03	0.02	0.11	0.04	0.02
cg00980978	WFDC2	Pure Island	Within	0.05	0.08	0.05	NA	0.04	0.06	0.04	0.06	0.07	0.13	0.07	0.43	0.9	0.19	0.48	0.21	0.22	0.09	0.09	0.09	0.67	NA	0.19	0.02	0.65	0.13	0.83	0.69	0.06	0.06	0.03	0.33	0.15	0.06	0.06	0.8	0.07	0.44	0.82	0.03	0.9	0.16	0.03	0.77	0.05	0.06
cg01009664	TRH	Pure Island	Within	0.13	0.15	0.17	0.06	0.12	0.07	0.24	0.11	0.05	0.06	0.19	0.86	0.63	0.62	0.37	0.95	0.85	0.94	0.93	0.95	0.95	0.96	0.87	0.92	0.97	0.97	0.97	0.97	0.98	0.85	0.33	0.93	0.99	0.96	0.97	0.97	0.8	0.95	0.98	0.96	0.97	0.77	0.93	0.93	0.85	0.92
cg01013324	EFNB3	Pure Island	Within	0.08	0.08	0.03	0.05	0.03	0.02	0.02	0.03	0.03	0.02	0.06	0.19	0.97	0.48	0.28	0.05	0.14	0.05	0.46	0.67	0.97	0.97	0.24	0.03	0.37	0.13	0.05	0.32	0.02	0.22	0.04	0.74	0.01	0.2	0.62	0.98	0.69	0.74	0.98	0.98	0.87	0.05	0.66	0.95	0.48	0.82
cg01015879	RDX	Pure Island	Within	0.13	0.1	0.05	0.16	0.04	0.05	0.04	0.05	0.05	0.03	0.06	0.07	0.06	0.04	0.08	0.08	0.07	0.05	0.08	0.09	0.37	NA	0.03	0.03	0.03	0.05	0.1	0.03	0.03	0.03	0.03	0.03	0.1	0.04	0.87	0.06	0.12	0.04	0.05	0.05	0.06	0.05	0.04	0.15	0.05	0.04
cg01031400	TNFRSF10D	Pure Island	Within	0.04	0.05	0.04	0.04	0.05	0.05	0.06	0.05	0.04	0.08	0.03	0.96	0.03	0.03	0.93	0.91	0.3	0.92	0.06	0.05	0.11	0.07	0.03	0.62	0.02	0.94	0.02	0.02	0.95	0.09	0.03	0.02	0.94	0.27	0.02	0.06	0.05	0.03	0.03	0.05	0.03	0.04	0.02	0.09	0.06	0.03
cg01049530	BMP3	Pure Island	Within	0.07	0.08	0.07	0.04	0.05	0.05	0.06	0.06	0.07	0.05	0.04	0.06	0.06	0.18	0.13	0.93	0.07	0.45	0.88	0.56	0.94	0.91	0.22	0.03	0.15	0.96	0.07	0.6	0.03	0.1	0.04	0.61	0.05	0.98	0.97	0.81	0.92	0.91	0.96	0.92	0.97	0.06	0.98	0.85	0.11	0.93
cg01062029	ROR2	Pure Island	Within	0.17	0.13	0.07	0.15	0.04	0.03	0.03	0.03	0.03	0.02	0.12	0.06	0.27	0.44	0.2	0.67	0.5	0.06	0.11	0.4	0.8	0.76	0.33	0.55	0.29	0.78	0.05	0.03	0.44	0.27	0.25	0.25	0.78	0.07	0.39	0.3	0.84	0.24	0.83	0.44	0.78	0.07	0.45	0.18	0.52	0.04
cg01092561	PPP1R3B	Pure Island	Within	0.15	0.02	0.02	0.02	0.03	0.03	0.03	0.04	0.03	0.02	0.06	0.11	0.02	0.04	0.74	0.04	0.03	0.02	0.85	0.25	0.36	0.03	0.01	0.01	0.02	0.03	0.02	0.01	0.01	0.22	0.02	0.19	0.01	0.03	0.02	0.03	0.04	0.02	0.04	0.02	0.05	0.03	0.02	0.07	0.08	0.03
cg01116966	TCF7	Pure Island	Within	0.04	0.04	0.04	0.04	0.04	0.05	0.04	0.03	0.07	0.02	0.14	0.97	0.02	0.32	0.53	0.07	0.05	0.02	0.61	0.09	0.89	0.61	0.01	0.01	0.01	0.12	0.02	0.19	0.03	0.01	0.02	0.02	0.04	0.01	0.01	0.06	0.29	0.04	0.97	0.99	0.83	0.03	0.04	0.53	0.33	0.02
cg01120165	HDAC10	Pure Island	Within	0.21	0.22	0.14	0.06	0.06	0.07	0.09	0.07	0.05	0.07	0.05	0.93	0.68	0.75	0.93	0.65	0.8	0.7	0.77	0.53	0.8	0.21	0.14	0.61	0.87	0.85	0.05	0.26	0.93	0.42	0.14	0.1	0.2	0.3	0.09	0.82	0.08	0.65	0.19	0.75	0.83	0.07	0.62	0.35	0.51	0.18
cg01131735	AC130686.6	Associated Island	Within	0.13	0.17	0.07	0.02	0.04	0.03	0.03	0.03	0.02	0.02	0.02	0.05	0.05	0.04	0.15	0.08	0.13	0.09	0.11	0.18	0.15	0.12	0.02	0.02	0.02	0.03	0.03	0.02	0.02	0.02	0.03	0.03	0.02	0.03	0.2	0.1	0.06	0.04	0.03	0.04	0.03	0.05	0.06	0.09	0.08	0.03
cg01137532	ZNF365	Pure Island	Within	0.06	0.03	0.02	0.04	0.04	0.04	0.04	0.04	0.04	0.01	0.02	0.02	0.03	0.02	0.05	0.03	0.04	0.03	0.05	0.04	0.95	0.96	0.17	0.02	0.02	0.02	0.03	0.01	0.01	0.02	0.03	0.02	0.02	0.02	0.98	0.03	0.9	0.77	0.98	0.15	0.96	0.02	0.02	0.05	0.56	0.03
cg01151699	CACNG2	Associated Island	Within	0.14	0.12	0.06	0.23	0.06	0.09	0.1	0.12	0.09	0.17	0.06	0.05	0.44	0.12	0.16	0.15	0.12	0.11	0.19	0.18	0.82	0.82	0.12	0.03	0.04	0.07	0.06	0.04	0.04	0.06	0.04	0.05	0.18	0.05	0.84	0.11	0.77	0.39	0.33	0.2	0.35	0.09	0.28	0.68	0.79	0.07
cg01154193	IQCC	Pure Island	Within	0.1	0.08	0.06	0.04	0.05	0.05	0.06	0.06	0.05	0.03	0.04	0.1	0.13	0.08	0.1	0.07	0.11	0.07	0.1	0.1	0.09	0.6	0.08	0.06	0.07	0.07	0.05	0.09	0.06	0.05	0.06	0.09	0.05	0.09	0.05	0.05	0.06	0.05	0.04	0.06	0.1	0.06	0.06	0.28	0.1	0.07
cg01168201	HIC1	Pure Island	Within	0.06	0.06	0.04	0.04	0.02	0.04	0.04	0.04	0.03	0.02	0.02	0.96	0.08	0.04	0.96	0.05	0.06	0.06	0.1	0.07	0.77	0.51	0.02	0.03	0.02	0.03	0.05	0.02	0.03	0.02	0.02	0.03	0.02	0.03	0.03	0.03	0.06	0.24	0.04	0.06	0.05	0.05	0.04	0.11	0.06	0.03
cg01184522	ZNF496	Pure Island	Within	0.07	0.06	0.03	0.03	0.03	0.03	0.02	0.03	0.02	0.02	0.03	0.03	0.02	0.03	0.06	0.06	0.06	0.05	0.05	0.04	0.03	0.03	0.02	0.01	0.01	0.02	0.14	0.28	0.01	0.03	0.02	0.01	0.02	0.02	0.03	0.42	0.07	0.02	0.45	0.57	0.04	0.04	0.03	0.05	0.12	0.02
cg01186777	TNFSF9	Pure Island	Within	0.06	0.05	0.04	0.11	0.09	0.08	0.06	0.07	0.06	0.05	0.05	0.04	0.04	0.03	0.06	0.07	0.05	0.05	0.05	0.06	0.03	0.04	0.03	0.03	0.02	0.04	0.04	0.02	0.02	0.02	0.04	0.03	0.05	0.03	0.03	0.04	0.04	0.03	0.04	0.04	0.04	0.07	0.18	0.06	0.07	0.04
cg01204271	YBX2	Pure Island	Within	0.03	0.04	0.04	0.1	0.09	0.09	0.08	0.08	0.08	0.1	0.04	0.07	0.07	0.21	0.48	0.05	0.07	0.06	0.04	0.04	0.04	0.96	0.01	0.02	0.02	0.02	0.08	0.02	0.03	0.02	0.03	0.09	0.11	0.04	0.03	0.04	0.05	0.06	0.03	0.29	0.99	0.06	0.69	0.11	0.91	0.04
cg01221637	C20orf112	Pure Island	Within	0.09	0.09	0.05	0.03	0.03	0.03	0.03	0.03	0.03	0.02	0.02	0.05	0.04	0.03	0.09	0.05	0.09	0.05	0.08	0.1	0.08	0.08	0.02	0.02	0.03	0.03	0.02	0.02	0.02	0.02	0.02	0.03	0.03	0.03	0.02	0.03	0.03	0.02	0.03	0.03	0.03	0.03	0.02	0.1	0.06	0.03
cg01226811	KCNJ8	Pure Island	Within	0.08	0.08	0.07	0.04	0.05	0.08	0.06	0.08	0.08	0.04	0.13	0.06	0.51	0.21	0.27	0.08	0.52	0.33	0.62	0.67	0.82	0.8	0.18	0.05	0.11	0.17	0.07	0.45	0.06	0.05	0.09	0.08	0.05	0.06	0.64	0.1	0.5	0.11	0.13	0.55	0.86	0.06	0.62	0.5	0.15	0.42
cg01231779	NID2	Pure Island	Within	0.08	0.04	0.03	0.06	0.06	0.06	0.07	0.07	0.07	0.04	0.05	0.57	0.03	0.28	0.09	0.9	0.93	0.4	0.93	0.62	0.96	0.93	0.29	0.02	0.02	0.93	0.05	0.33	0.02	0.02	0.46	0.22	0.06	0.51	0.15	0.54	0.89	0.93	0.96	0.96	0.28	0.04	0.94	0.81	0.82	0.05
cg01259619	ITPKB	Pure Island	Within	0.05	0.05	0.02	0.02	0.05	0.02	0.02	0.02	0.02	0.01	0.02	0.79	0.03	0.02	0.79	0.78	0.92	0.26	0.06	0.43	0.06	0.23	0.1	0.02	0.97	0.45	0.81	0.35	0.02	0.07	0.02	0.48	0.01	0.16	0.1	0.28	0.15	0.96	0.94	0.46	0.05	0.02	0.03	0.91	0.06	0.31
cg01301664	FST	Pure Island	Within	0.13	0.06	0.12	0.05	0.06	0.05	0.04	0.06	0.05	0.02	0.06	0.07	0.07	0.06	0.07	0.13	0.14	0.05	0.17	0.12	0.31	0.9	0.04	0.04	0.04	0.05	0.07	0.05	0.04	0.04	0.04	0.04	0.04	0.07	0.84	0.15	0.48	0.11	0.15	0.09	0.1	0.13	0.08	0.33	0.1	0.04
cg01308501	IL12A	Pure Island	Within	0.08	0.07	0.05	0.02	0.02	0.02	0.02	0.03	0.02	0.03	0.03	0.05	0.04	0.05	0.13	0.09	0.06	0.05	0.09	0.11	0.4	0.08	0.02	0.28	0.02	0.02	0.03	0.03	0.01	0.02	0.02	0.02	0.45	0.03	0.07	0.06	0.06	0.07	0.02	0.1	0.05	0.1	0.03	0.04	0.05	0.03
cg01313514	WNT3A	Pure Island	Within	0.15	0.07	0.07	0.07	0.04	0.04	0.05	0.05	0.04	0.04	0.06	0.07	0.43	0.44	0.19	0.29	0.13	0.24	0.78	0.78	0.86	0.86	0.29	0.32	0.22	0.22	0.03	0.35	0.09	0.26	0.11	0.41	0.18	0.06	0.86	0.87	0.84	0.57	0.83	0.45	0.7	0.07	0.47	0.4	0.46	0.17
cg01316819	PPP1R1A	Pure Island	Within	0.03	0.03	0.03	0.02	0.06	0.07	0.08	0.05	0.04	0.02	0.07	0.08	0.19	0.12	0.06	0.06	0.05	0.04	0.3	0.07	0.95	0.97	0.2	0.03	0.02	0.04	0.03	0.26	0.03	0.02	0.06	0.14	0.02	0.02	0.64	0.02	0.09	0.34	0.56	0.2	0.65	0.03	0.02	0.52	0.12	0.05
cg01322134	WNT3A	Pure Island	Within	0.17	0.16	0.08	0.04	0.03	0.03	0.02	0.03	0.03	0.02	0.05	0.26	0.97	0.67	0.25	0.35	0.2	0.12	0.89	0.67	0.87	0.87	0.24	0.03	0.09	0.1	0.05	0.13	0.02	0.03	0.09	0.75	0.03	0.03	0.97	0.98	0.95	0.79	0.97	0.89	0.67	0.04	0.74	0.49	0.53	0.4
cg01344452	C17orf67	Pure Island	Within	0.05	0.05	0.05	0.15	0.02	0.04	0.03	0.02	0.03	0.05	0.02	0.07	0.02	0.03	0.53	0.03	0.04	0.02	0.04	0.03	0.02	0.02	0.01	0.01	0.06	0.02	0.98	0.01	0.01	0.01	0.02	0.19	0.02	0.02	0.01	0.03	0.02	0.02	0.08	0.03	0.02	0.05	0.01	0.95	0.95	0.02
cg01366419	WBSCR17	Pure Island	Within	0.07	0.07	0.06	0.04	0.07	0.07	0.11	0.09	0.08	0.06	0.14	0.04	0.93	0.5	0.29	0.62	0.42	0.08	0.84	0.8	0.91	0.92	0.36	0.03	0.74	0.67	0.04	0.35	0.03	0.12	0.59	0.74	0.37	0.64	0.81	0.45	0.62	0.88	0.86	0.92	0.92	0.84	0.74	0.82	0.5	0.55
cg01389761	Telomerase-vert	Pure Island	Within	0.09	0.11	0.06	0.11	0.06	0.06	0.06	0.06	0.08	0.08	0.11	0.89	0.55	0.05	0.25	0.3	0.11	0.06	0.1	0.1	0.09	0.08	0.04	0.03	0.04	0.51	0.74	0.03	0.02	0.23	0.04	0.15	0.16	0.79	0.05	0.09	0.07	0.13	0.06	0.04	0.06	0.07	0.04	0.1	0.1	0.06
cg01410472	CRISPLD1	Pure Island	Within	0.05	0.04	0.04	0.03	0.03	0.04	0.03	0.02	0.03	0.02	0.07	0.03	0.03	0.32	0.74	0.05	0.79	0.03	0.79	0.77	0.81	0.87	0.3	0.02	0.24	0.18	0.02	0.06	0.02	0.02	0.03	0.03	0.01	0.8	0.85	0.86	0.81	0.86	0.85	0.84	0.86	0.54	0.83	0.79	0.1	0.17
cg01419479	GLUL	Pure Island	Within	0.04	0.04	0.04	0.01	0.03	0.03	0.03	0.04	0.03	0.02	0.03	0.98	0.04	0.02	0.6	0.04	0.03	0.03	0.03	0.05	0.03	0.02	0.31	0.01	0.74	0.02	0.04	0.1	0.01	0.01	0.01	0.03	0.01	0.01	0.09	0.06	0.02	0.03	0.02	0.36	0.71	0.06	0.03	0.05	0.04	0.02
cg01419675	RHOB	Pure Island	Within	0.05	0.05	0.05	0.03	0.09	0.1	0.1	0.11	0.09	0.04	0.06	0.04	0.03	0.07	0.07	0.09	0.08	0.08	0.1	0.07	0.07	0.06	0.03	0.04	0.03	0.06	0.03	0.03	0.04	0.04	0.06	0.04	0.02	0.04	0.03	0.04	0.07	0.03	0.04	0.04	0.04	0.04	0.04	0.11	0.1	0.08
cg01424107	CDX2	Pure Island	Within	0.04	0.03	0.04	0.03	0.04	0.05	0.04	0.04	0.03	0.03	0.06	0.03	0.79	0.3	0.06	0.9	0.73	0.25	0.06	0.06	0.04	0.02	0.21	0.02	0.02	0.93	0.03	0.04	0.03	0.12	0.32	0.75	0.71	0.02	0.02	0.02	0.04	0.02	0.02	0.15	0.3	0.04	0.02	0.05	0.8	0.39
cg01425670	NEGR1	Associated Island	Within	0.05	0.06	0.04	0.03	0.03	0.03	0.03	0.03	0.03	0.03	0.02	0.03	0.03	0.03	0.06	0.04	0.25	0.04	0.13	0.07	0.85	0.88	0.02	0.02	0.04	0.04	0.02	0.02	0.02	0.02	0.02	0.02	0.02	0.02	0.53	0.25	0.61	0.03	0.78	0.24	0.52	0.03	0.03	0.77	0.04	0.03
cg01429321	LOX	Pure Island	Within	0.04	0.03	0.04	0.05	0.06	0.05	0.04	0.04	0.04	0.02	0.06	0.05	0.04	0.08	0.06	0.06	0.09	0.04	0.07	0.04	0.93	0.95	0.34	0.03	0.74	0.03	0.04	0.02	0.02	0.13	0.04	0.02	0.36	0.06	0.77	0.27	0.08	0.03	0.16	0.28	0.12	0.04	0.06	0.84	0.06	0.04
cg01431114	AL121789.38	Pure Island	Within	0.1	0.1	0.06	0.04	0.05	0.04	0.05	0.05	0.05	0.03	0.13	0.18	0.76	0.55	0.14	0.28	0.8	0.9	0.18	0.25	0.12	0.91	0.59	0.22	0.07	0.38	0.05	0.24	0.05	0.1	0.12	0.05	0.81	0.86	0.09	0.94	0.65	0.14	0.64	0.27	0.93	0.07	0.86	0.73	0.14	0.05
cg01442799	YAP1	Pure Island	Within	0.11	0.12	0.07	0.06	0.05	0.04	0.05	0.05	0.06	0.06	0.04	0.07	0.07	0.05	0.17	0.1	0.12	0.07	0.14	0.13	0.11	0.12	0.04	0.46	0.04	0.05	0.05	0.04	0.03	0.04	0.04	0.04	0.78	0.05	0.04	0.04	0.08	0.04	0.03	0.04	0.05	0.04	0.05	0.06	0.07	0.05
cg01461641	TMEM63A	Pure Island	Within	0.07	0.04	0.04	0.02	0.04	0.04	0.03	0.04	0.03	0.02	0.05	0.03	0.03	0.03	0.09	0.04	0.04	0.05	0.06	0.07	0.06	0.04	0.02	0.98	0.02	0.03	0.03	0.02	0.02	0.02	0.02	0.01	0.95	0.02	0.03	0.02	0.03	0.03	0.02	0.04	0.03	0.05	0.03	0.03	0.04	0.03
cg01462829	HS3ST1	Pure Island	Within	0.04	0.03	0.02	0.02	0.04	0.03	0.04	0.04	0.05	0.02	0.03	0.97	0.02	0.02	0.8	0.07	0.04	0.52	0.09	0.04	0.04	0.96	0.23	0.95	0.05	0.32	0.01	0.22	0.01	0.01	0.02	0.88	0.01	0.01	0.02	0.02	0.03	0.05	0.01	0.02	0.99	0.03	0.01	0.05	0.06	0.04
cg01468621	BRSK2	Pure Island	Within	0.11	0.16	0.05	0.05	0.06	0.05	0.04	0.05	0.06	0.02	0.04	0.58	0.69	0.27	0.32	0.06	0.47	0.06	0.12	0.14	0.11	0.1	0.05	0.04	0.02	0.03	0.06	0.05	0.05	0.03	0.06	0.03	0.05	0.03	0.97	0.89	0.78	0.03	0.93	0.83	0.04	0.05	0.03	0.67	0.43	0.04
cg01471384	DKK2	Associated Island	Within	0.05	0.05	0.03	0.08	0.03	0.03	0.02	0.04	0.02	0.05	0.04	0.37	0.03	0.15	0.3	0.5	0.21	0.05	0.45	0.2	0.81	0.79	0.41	0.02	0.11	0.81	0.19	0.33	0.02	0.19	0.02	0.63	0.02	0.71	0.52	0.06	0.44	0.71	0.71	0.82	0.9	0.03	0.58	0.8	0.28	0.42
cg01485998	VASH2	Pure Island	Within	0.09	0.08	0.05	0.06	0.04	0.04	0.05	0.04	0.04	0.07	0.07	0.05	0.05	0.06	0.1	0.09	0.07	0.04	0.11	0.09	0.87	0.39	0.03	0.03	0.06	0.04	0.04	0.17	0.02	0.02	0.03	0.03	0.03	0.04	0.93	0.06	0.08	0.06	0.57	0.04	0.06	0.09	0.04	0.09	0.08	0.03
cg01505590	PHLDA2	Pure Island	Within	0.03	0.04	0.03	0.01	0.04	0.03	0.04	0.04	0.03	0.02	0.02	0.26	0.02	0.02	0.03	0.03	0.03	0.03	0.03	0.02	0.03	0.03	0.01	0.01	0.02	0.02	0.02	0.01	0.01	0.01	0.01	0.01	0.01	0.01	0.01	0.01	0.03	0.01	0.01	0.02	0.02	0.02	0.02	0.07	0.06	0.02
cg01519742	JAKMIP1	Pure Island	Within	0.06	0.04	0.04	0.04	0.03	0.05	0.12	0.04	0.05	0.02	0.16	0.03	0.98	0.8	0.37	0.04	0.84	0.04	0.16	0.05	0.93	0.91	0.02	0.01	0.02	0.02	0.03	0.03	0.01	0.02	0.1	0.03	0.02	0.01	0.98	0.98	0.87	0.95	0.95	0.98	0.88	0.04	0.98	0.93	0.71	0.48
cg01532103	BSG	Pure Island	Within	0.21	0.09	0.07	0.02	0.05	0.06	0.12	0.06	0.05	0.04	0.23	0.07	0.02	0.18	0.48	0.06	0.03	0.03	0.06	0.03	0.12	0.04	0.01	0.01	0.02	0.03	0.02	0.02	0.02	0.67	0.04	0.97	0.01	0.72	0.02	0.07	0.04	0.04	0.45	0.05	0.03	0.04	0.03	0.09	0.11	0.03
cg01533387	IFI30	Pure Island	Within	0.09	0.07	0.05	0.03	0.03	0.03	0.04	0.03	0.03	0.03	0.03	0.06	0.05	0.35	0.15	0.06	0.06	0.04	0.09	0.07	0.07	0.06	0.03	0.04	0.04	0.03	0.03	0.03	0.03	0.03	0.03	0.03	0.03	0.05	0.05	0.05	0.07	0.04	0.04	0.06	0.05	0.06	0.03	0.07	0.06	0.04
cg01555431	AKAP12	Pure Island	Within	0.08	0.08	0.06	0.09	0.07	0.07	0.12	0.07	0.05	0.02	0.12	0.07	0.26	0.15	0.18	0.89	0.6	0.36	0.72	0.67	0.92	0.92	0.24	0.07	0.08	0.91	0.04	0.07	0.07	0.07	0.11	0.07	0.06	0.91	0.9	0.85	0.89	0.91	0.91	0.18	0.58	0.16	0.58	0.45	0.61	0.06
cg01557297	SLC22A17	Pure Island	Within	0.05	0.05	0.03	0.02	0.04	0.04	0.02	0.02	0.02	0.01	0.02	0.03	0.05	0.45	0.18	0.03	0.05	0.04	0.12	0.39	0.96	0.97	0.42	0.01	0.02	0.02	0.02	0.01	0.02	0.01	0.03	0.24	0.01	0.02	0.99	0.98	0.95	0.18	0.98	0.13	0.41	0.03	0.86	0.48	0.42	0.03
cg01557989	SLC24A3	Pure Island	Within	0.06	0.05	0.03	0.05	0.04	0.03	0.04	0.04	0.04	0.01	0.11	0.03	0.91	0.35	0.17	0.05	0.07	0.03	0.77	0.11	0.95	0.95	0.46	0.01	0.11	0.48	0.05	0.28	0.32	0.4	0.07	0.59	0.89	0.01	0.9	0.94	0.92	0.77	0.94	0.54	0.91	0.05	0.83	0.91	0.34	0.39
cg01561916	HAAO	Pure Island	Within	0.07	0.09	0.05	0.03	0.03	0.04	0.03	0.02	0.02	0.02	0.12	0.79	0.08	0.66	0.56	0.94	0.33	0.93	0.87	0.81	0.95	0.94	0.96	0.11	0.94	0.97	0.68	0.97	0.87	0.61	0.23	0.93	0.93	0.96	0.35	0.77	0.43	0.35	0.96	0.28	0.97	0.36	0.5	0.93	0.08	0.02
cg01580888	RHPN2	Pure Island	Within	0.03	0.04	0.04	0.01	0.02	0.01	0.02	0.02	0.02	0.01	0.01	0.05	0.6	0.02	0.3	0.03	0.1	0.03	0.17	0.08	0.03	0.03	0.03	0.06	0.01	0.02	0.02	0.01	0.03	0.01	0.02	0.01	0.27	0.03	0.02	0.01	0.02	0.06	0.02	0.02	0.06	0.01	0.01	0.03	0.05	0.02
cg01599709	HBEGF	Pure Island	Within	0.07	0.09	0.07	0.06	0.05	0.06	0.05	0.05	0.05	0.08	0.04	0.07	0.37	0.05	0.06	0.76	0.24	0.06	0.18	0.14	0.11	0.07	0.03	0.03	0.03	0.75	0.04	0.02	0.25	0.03	0.07	0.03	0.16	0.1	0.03	0.04	0.05	0.04	0.04	0.04	0.05	0.03	0.05	0.08	0.06	0.05
cg01606998	PANX2	Pure Island	Within	0.09	0.1	0.1	0.06	0.05	0.06	0.06	0.06	0.05	0.04	0.08	0.1	0.08	0.1	0.23	0.08	0.2	0.07	0.1	0.09	0.1	0.78	0.07	0.07	0.07	0.07	0.08	0.07	0.06	0.07	0.07	0.08	0.03	0.08	0.11	0.11	0.11	0.1	0.06	0.09	0.09	0.09	0.07	0.47	0.11	0.07
cg01610488	TRPA1	Pure Island	Within	0.07	0.08	0.05	0.04	0.05	0.05	0.04	0.06	0.05	0.05	0.04	0.07	0.96	0.41	0.81	0.65	0.68	0.04	0.88	0.93	0.94	0.97	0.46	0.03	0.02	0.96	0.06	0.85	0.02	0.02	0.02	0.05	0.03	0.09	0.97	0.05	0.89	0.75	0.9	0.96	0.96	0.04	0.77	0.85	0.73	0.05
cg01651364	JRKL	Pure Island	Within	0.09	0.09	0.05	0.08	0.05	0.07	0.05	0.07	0.05	0.16	0.04	0.05	0.06	0.04	0.12	0.09	0.08	0.27	0.11	0.1	0.1	0.13	0.03	0.03	0.03	0.04	0.04	0.03	0.02	0.03	0.03	0.02	0.25	0.03	0.03	0.06	0.1	0.03	0.06	0.05	0.04	0.04	0.04	0.12	0.06	0.04
cg01655355	SLC5A5	Pure Island	Within	0.21	0.03	0.05	0.07	0.05	0.06	0.07	0.06	0.05	0.04	0.19	0.05	0.03	0.09	0.13	0.12	0.08	0.08	0.13	0.05	0.49	0.09	0.1	0.04	0.07	0.44	0.07	0.11	0.38	0.06	0.04	0.04	0.04	0.02	0.04	0.29	0.07	0.07	0.1	0.08	0.82	0.11	0.07	0.17	0.12	0.07
cg01656955	NT5C1A	Pure Island	Within	0.21	0.09	0.09	0.15	0.11	0.1	0.08	0.11	0.1	0.15	0.12	0.13	0.09	0.63	0.34	0.67	0.57	0.29	0.69	0.32	0.79	0.84	0.63	0.23	0.55	0.68	0.71	0.38	0.26	0.1	0.11	0.23	0.3	0.17	0.84	0.78	0.79	0.45	0.86	0.49	0.62	0.32	0.91	0.81	0.28	0.1
cg01663968	CTSZ	Pure Island	Within	0.08	0.1	0.06	0.04	0.08	0.06	0.06	0.06	0.06	0.03	0.03	0.05	0.06	0.04	0.06	0.87	0.08	0.05	0.07	0.07	0.09	0.04	0.05	0.88	0.02	0.92	0.02	0.02	0.03	0.03	0.03	0.02	0.7	0.06	0.02	0.03	0.04	0.02	0.04	0.04	0.03	0.06	0.03	0.08	0.06	0.03
cg01693157	TUBA1	Pure Island	Within	0.05	0.07	0.05	0.03	0.04	0.03	0.03	0.03	0.02	0.02	0.02	0.33	0.05	0.03	0.05	0.16	0.38	0.04	0.06	0.06	0.04	0.05	0.38	0.03	0.03	0.55	0.64	0.09	0.16	0.02	0.04	0.03	0.04	0.08	0.02	0.02	0.05	0.45	0.03	0.09	0.93	0.2	0.03	0.08	0.07	0.03
cg01697732	FAM20A	Pure Island	Within	0.13	0.1	0.05	0.12	0.04	0.05	0.03	0.04	0.04	0.02	0.05	0.98	0.82	0.2	0.79	0.86	0.68	0.51	0.96	0.77	0.96	0.97	0.03	0.02	0.02	0.98	0.05	0.35	0.02	0.02	0.04	0.03	0.07	0.03	0.98	0.97	0.89	0.99	0.98	0.99	0.43	0.24	0.32	0.96	0.06	0.12
cg01699584	KCTD8	Pure Island	Within	0.02	0.02	0.02	0.01	0.03	0.02	0.02	0.03	0.03	0.01	0.02	0.01	0.01	0.03	0.1	0.03	0.03	0.02	0.41	0.09	0.24	0.95	0.02	0.01	0.01	0.01	0.01	0.01	0.01	0.01	0.02	0.01	0.01	0.02	0.72	0.31	0.74	0.84	0.97	0.53	0.48	0.02	0.01	0.77	0.13	0.06
cg01722994	GRIN2A	Pure Island	Within	0.07	0.08	0.06	0.19	0.05	0.05	0.05	0.05	0.06	0.06	0.04	0.9	0.93	0.37	0.1	0.78	0.43	0.34	0.59	0.47	0.73	0.76	0.46	0.18	0.28	0.77	0.58	0.81	0.06	0.08	0.18	0.44	0.2	0.04	0.82	0.17	0.69	0.91	0.91	0.22	0.92	0.05	0.05	0.73	0.6	0.49
cg01725199	GALNT12	Pure Island	Within	0.17	0.15	0.07	0.03	0.03	0.03	0.04	0.04	0.04	0.03	0.05	0.44	0.06	0.52	0.73	0.08	0.14	0.11	0.17	0.18	0.19	0.17	0.02	0.03	0.02	0.03	0.03	0.02	0.03	0.03	0.03	0.03	0.03	0.03	0.02	0.03	0.05	0.05	0.04	0.06	0.05	0.05	0.03	0.05	0.07	0.05
cg01737507	PPIC	Pure Island	Within	0.07	0.04	0.04	0.11	0.06	0.05	0.05	0.05	0.04	0.07	0.02	0.04	0.05	0.03	0.06	0.05	0.07	0.04	0.08	0.07	0.04	0.06	0.02	0.02	0.02	0.02	0.03	0.02	0.02	0.02	0.03	0.02	0.07	0.03	0.02	0.02	0.04	0.03	0.03	0.03	0.02	0.03	0.04	0.1	0.07	NA
cg01743370	GCA	Pure Island	Within	0.06	0.05	0.04	0.05	0.05	0.07	0.03	0.04	0.04	0.09	0.04	0.19	0.04	0.05	0.6	0.05	0.05	0.05	0.08	0.07	0.04	0.24	0.02	0.02	0.03	0.03	0.03	0.02	0.02	0.02	0.03	0.04	0.04	0.03	0.03	0.03	0.06	0.22	0.04	0.03	0.81	0.03	0.03	0.1	0.08	0.04
cg01765461	TNFRSF11A	Pure Island	Within	0.05	0.06	0.06	0.04	0.03	0.04	0.04	0.03	0.03	0.02	0.03	0.78	0.06	0.04	0.06	0.05	0.07	0.03	0.08	0.09	0.05	0.32	0.06	0.04	0.02	0.03	0.02	0.03	0.03	0.03	0.03	0.04	0.02	0.03	0.03	0.03	0.05	0.1	0.05	0.07	0.05	0.04	0.03	0.08	0.1	0.03
cg01775414	PHF21B	Pure Island	Within	0.17	0.13	0.08	0.07	0.05	0.05	0.06	0.05	0.04	0.02	0.03	0.09	0.93	0.26	0.58	0.11	0.23	0.11	0.85	0.89	0.93	0.92	0.1	0.05	0.03	0.04	0.04	0.03	0.03	0.03	0.07	0.06	0.04	0.04	0.95	0.96	0.92	0.26	0.95	0.96	0.54	0.05	0.96	0.87	0.87	0.04
cg01802653	HERC3	Pure Island	Within	0.11	0.09	0.06	0.18	0.09	0.13	0.09	0.08	0.08	0.25	0.08	0.09	0.07	0.05	0.1	0.13	0.12	0.1	0.14	0.13	0.3	0.08	0.05	0.04	0.05	0.05	0.1	0.06	0.05	0.05	0.04	0.05	0.13	0.04	0.06	0.16	0.13	0.05	0.17	0.07	0.08	0.09	0.07	0.25	0.11	0.08
cg01805540	CACNB2	Pure Island	Within	0.04	0.07	0.04	0.03	0.04	0.03	0.03	0.03	0.03	0.01	0.06	0.03	0.6	0.06	0.15	0.4	0.78	0.05	0.63	0.41	0.83	0.86	0.42	0.22	0.02	0.37	0.01	0.25	0.02	0.01	0.2	0.02	0.46	0.02	0.03	0.03	0.36	0.14	0.01	0.98	0.98	0.92	0.81	0.49	0.88	0.03
cg01806808	PTK2	Pure Island	Within	0.05	0.05	0.03	0.02	0.03	0.03	0.02	0.02	0.02	0.02	0.02	0.02	0.03	0.02	0.05	0.04	0.04	0.03	0.05	0.04	0.04	0.04	0.01	0.01	0.01	0.02	0.01	0.01	0.01	0.01	0.02	0.02	0.01	0.02	0.02	0.02	0.05	0.02	0.01	0.03	0.02	0.03	0.02	0.05	0.04	0.02
cg01818492	ENPP1	Pure Island	Within	0.06	0.09	0.08	0.03	0.06	0.05	0.06	0.06	0.04	0.02	0.06	0.07	0.06	0.24	0.08	0.07	0.07	0.08	0.16	0.1	0.11	0.1	0.03	0.03	0.03	0.04	0.05	0.03	0.04	0.03	0.04	0.03	0.03	0.04	0.14	0.09	0.06	0.07	0.05	0.08	0.06	0.07	0.04	0.06	0.06	0.03
cg01824804	LOX	Pure Island	Within	0.08	0.08	0.06	0.03	0.09	0.07	0.08	0.08	0.06	0.05	0.08	0.18	0.07	0.08	0.13	0.08	0.1	0.07	0.23	0.1	0.89	0.91	0.16	0.06	0.57	0.08	0.06	0.1	0.06	0.1	0.06	0.09	0.04	0.1	0.91	0.43	0.56	0.1	0.49	0.89	0.34	0.08	0.85	0.79	0.11	0.06
cg01830294	WNT2	Pure Island	Within	0.14	0.03	0.04	0.03	0.13	0.11	0.14	0.14	0.12	0.1	0.21	0.68	0.99	0.61	0.77	0.96	0.95	0.77	0.96	0.97	0.98	0.99	0.56	0.42	0.52	0.97	0.08	0.66	0.05	0.63	0.29	0.99	0.04	0.98	0.99	0.98	0.96	0.99	0.98	0.99	0.99	0.56	0.99	0.93	0.96	0.92
cg01856970	IL15	Pure Island	Within	0.08	0.05	0.04	0.07	0.05	0.02	0.03	0.03	0.02	0.07	0.05	0.05	0.23	0.04	0.4	0.07	0.06	0.04	0.11	0.09	0.06	0.81	0.06	0.04	0.03	0.02	0.04	0.05	0.03	0.04	0.03	0.04	0.11	0.83	0.03	0.05	0.06	0.22	0.03	0.07	0.14	0.04	0.03	0.07	0.06	0.04
cg01868782	HEY2	Pure Island	Within	0.09	0.08	0.06	0.18	0.05	0.07	0.05	0.05	0.05	0.07	0.09	0.92	0.14	0.11	0.13	0.15	0.33	0.09	0.09	0.17	0.92	0.93	0.04	0.03	0.08	0.67	0.05	0.08	0.03	0.45	0.26	0.23	0.07	0.05	0.81	0.11	0.63	0.1	0.84	0.33	0.41	0.08	0.27	0.82	0.45	0.06
cg01879488	CD44	Pure Island	Within	0.15	0.19	0.05	0.1	0.07	0.07	0.05	0.08	0.05	0.08	0.03	0.05	0.06	0.04	0.19	0.19	0.07	0.06	0.11	0.21	0.15	0.66	0.04	0.03	0.03	0.94	0.08	0.03	0.02	0.06	0.06	0.03	0.21	0.06	0.03	0.05	0.06	0.04	0.06	0.04	0.04	0.06	0.03	0.07	0.07	0.06
cg01882179	SOCS2	Pure Island	Within	0.06	0.05	0.05	0.02	0.03	0.04	0.04	0.04	0.03	0.02	0.03	0.96	0.03	0.03	0.08	0.04	0.07	0.06	0.08	0.07	0.07	0.05	0.02	0.02	0.02	0.03	0.02	0.02	0.02	0.02	0.02	0.02	0.01	0.02	0.02	0.03	0.04	0.03	0.02	0.03	0.03	0.05	0.02	0.07	0.05	0.03
cg01920232	RFX4	Pure Island	Within	0.09	0.09	0.09	0.2	0.09	0.07	0.1	0.1	0.06	0.11	0.06	0.83	0.93	0.14	0.58	0.85	0.43	0.42	0.2	0.26	0.83	0.85	0.34	0.04	0.42	0.87	0.27	0.58	0.07	0.47	0.07	0.87	0.07	0.11	0.7	0.79	0.79	0.91	0.89	0.56	0.91	0.08	0.85	0.79	0.51	0.47
cg01934790	FBXL16	Pure Island	Within	0.13	0.07	0.06	0.06	0.05	0.05	0.06	0.06	0.05	0.02	0.05	0.61	0.26	0.08	0.27	0.16	0.56	0.09	0.16	0.14	0.78	0.69	0.38	0.07	0.48	0.19	0.62	0.62	0.34	0.18	0.07	0.44	0.03	0.28	0.32	0.85	0.48	0.76	0.81	0.5	0.76	0.26	0.65	0.63	0.61	0.45
cg01939681	GABRB2	Pure Island	Within	0.05	0.06	0.05	0.08	0.03	0.04	0.04	0.04	0.05	0.02	0.04	0.16	0.07	0.14	0.27	0.83	0.3	0.58	0.38	0.1	0.88	0.85	0.28	0.03	0.38	0.88	0.03	0.4	0.03	0.08	0.03	0.26	0.02	0.04	0.9	0.33	0.74	0.65	0.91	0.53	0.84	0.05	0.25	0.74	0.39	0.06
cg01942127	CACNA1D	Pure Island	Within	0.05	0.08	0.05	0.07	0.04	0.05	0.05	0.05	0.04	0.03	0.11	0.1	0.98	0.55	0.77	0.13	0.88	0.04	0.35	0.27	0.93	0.97	0.49	0.02	0.35	0.46	0.08	0.33	0.06	0.17	0.51	0.78	0.03	0.17	0.69	0.98	0.05	0.97	0.98	0.35	0.91	0.03	0.14	0.92	0.84	0.68
cg01943185	NMU	Pure Island	Within	0.08	0.1	0.08	0.04	0.05	0.06	0.09	0.06	0.05	0.04	0.07	0.48	0.52	0.07	0.59	0.11	0.17	0.05	0.48	0.44	0.42	0.46	0.3	0.05	0.2	0.06	0.18	0.39	0.06	0.32	0.08	0.43	0.03	0.4	0.06	0.04	0.24	0.28	0.06	0.08	0.46	0.05	0.04	0.14	0.1	0.3
cg01946574	PTPRM	Pure Island	Within	0.06	0.06	0.06	0.03	0.06	0.06	0.05	0.05	0.05	0.04	0.04	0.05	0.08	0.05	0.06	0.65	0.63	0.11	0.78	0.73	0.81	0.47	0.44	0.05	0.05	0.72	0.03	0.23	0.03	0.05	0.14	0.04	0.17	0.04	0.87	0.68	0.76	0.05	0.87	0.81	0.88	0.16	0.13	0.75	0.09	0.04
cg01957330	SKAP2	Pure Island	Within	0.08	0.06	0.05	0.2	0.05	0.03	0.03	0.04	0.04	0.09	0.03	0.84	0.03	0.04	0.13	0.06	0.06	0.45	0.05	0.07	0.08	0.09	0.03	0.02	0.02	0.03	0.05	0.02	0.03	0.02	0.03	0.03	0.06	0.03	0.03	0.03	0.09	0.04	0.04	0.03	0.03	0.03	0.03	0.07	0.11	0.04
cg01966465	RUNDC3B	Pure Island	Within	0.06	0.04	0.03	0.07	0.04	0.03	0.03	0.04	0.03	0.04	0.05	0.95	0.02	0.11	0.06	0.04	0.08	0.03	0.04	0.04	0.92	0.86	0.01	0.01	0.02	0.02	0.03	0.01	0.01	0.01	0.02	0.03	0.02	0.02	0.05	0.03	0.07	0.03	0.11	0.97	0.75	0.03	0.06	0.23	0.06	0.16
cg01971122	CALCA	Pure Island	Within	0.12	0.12	0.16	0.19	0.06	0.07	0.1	0.08	0.07	0.09	0.18	0.56	0.91	0.47	0.22	0.81	0.15	0.31	0.3	0.23	0.87	0.85	0.09	0.6	0.48	0.8	0.32	0.36	0.9	0.32	0.07	0.5	0.06	0.18	0.68	0.65	0.55	0.77	0.51	0.82	0.9	0.23	0.6	0.75	0.28	0.34
cg01980637	PER1	Pure Island	Within	0.03	0.03	0.03	0.01	0.04	0.04	0.05	0.05	0.04	0.02	0.04	0.02	0.02	0.03	0.28	0.06	0.56	0.04	0.06	0.03	0.03	0.02	0.01	0.01	0.44	0.08	0.95	0.36	0.03	0.03	0.03	0.02	0.01	0.02	0.03	0.03	0.04	0.02	0.09	0.03	0.98	0.03	0.02	0.05	0.09	0.03
cg01988129	ADHFE1	Pure Island	Within	0.23	0.23	0.12	0.12	0.13	0.13	0.17	0.13	0.16	0.12	0.06	0.58	0.28	0.52	0.93	0.32	0.23	0.13	0.87	0.88	0.94	0.91	0.32	0.96	0.62	0.94	0.97	0.88	0.95	0.58	0.7	0.64	0.98	0.97	0.97	0.96	0.89	0.93	0.95	0.92	0.94	0.18	0.08	0.89	0.34	0.07
cg02001410	MAP1B	Pure Island	Within	0.03	0.04	0.05	0.03	0.06	0.05	0.05	0.06	0.05	0.02	0.05	0.51	0.62	0.07	0.25	0.04	0.05	0.22	0.07	0.05	0.94	0.92	0.18	0.02	0.02	0.04	0.02	0.38	0.02	0.02	0.04	0.02	0.02	0.05	0.93	0.89	0.88	0.94	0.95	0.93	0.74	0.04	0.91	0.66	0.06	0.04
cg02008154	TBX20	Pure Island	Within	0.07	0.08	0.06	0.03	0.07	0.05	0.06	0.1	0.08	0.02	0.24	0.78	0.92	0.82	0.46	0.84	0.61	0.48	0.08	0.31	0.88	0.84	0.14	0.19	0.2	0.9	0.55	0.29	0.86	0.85	0.32	0.89	0.79	0.26	0.83	0.55	0.68	0.42	0.9	0.43	0.89	0.56	0.39	0.81	0.56	0.55
cg02008544	TNFRSF10B	Pure Island	Within	0.08	0.09	0.04	0.04	0.04	0.04	0.03	0.04	0.04	0.03	0.03	0.44	0.05	0.04	0.09	0.07	0.08	0.05	0.09	0.08	0.08	0.07	0.03	0.82	0.04	0.04	0.04	0.04	0.03	0.03	0.04	0.04	0.28	0.04	0.04	0.04	0.09	0.05	0.04	0.04	0.04	0.05	0.03	0.09	0.06	0.04
cg02026235	RHBDL1	Pure Island	Within	0.13	0.19	0.12	0.04	0.07	0.09	0.08	0.09	0.1	0.05	0.11	0.9	0.35	0.73	0.72	0.83	0.81	0.77	0.82	0.26	0.16	0.84	0.11	0.05	0.35	0.93	0.94	0.82	0.96	0.09	0.05	0.83	0.97	0.38	0.04	0.96	0.06	0.95	0.93	0.13	0.93	0.06	0.93	0.78	0.18	0.91
cg02033116	GPATCH1	Pure Island	Within	0.18	0.09	0.11	0.06	0.05	0.05	0.06	0.06	0.05	0.06	0.09	0.08	0.09	0.07	0.41	0.09	0.08	0.08	0.13	0.11	0.08	0.12	0.06	0.05	0.06	0.06	0.07	0.05	0.06	0.05	0.06	0.06	0.03	0.07	0.11	0.14	0.08	0.55	0.06	0.11	0.12	0.16	0.05	0.09	0.11	0.06
cg02055963	CDX2	Pure Island	Within	0.06	0.09	0.08	0.04	0.15	0.07	0.07	0.11	0.08	0.09	0.07	0.65	0.96	0.47	0.09	0.9	0.91	0.83	0.17	0.09	0.05	0.05	0.96	0.37	0.34	0.96	0.05	0.55	0.43	0.97	0.82	0.95	0.32	0.33	0.04	0.02	0.05	0.03	0.03	0.92	0.71	0.21	0.03	0.05	0.91	0.61
cg02103294	SDCBP	Pure Island	Within	0.05	0.06	0.06	0.08	0.04	0.05	0.04	0.07	0.04	0.02	0.06	0.05	0.05	0.06	0.05	0.08	0.07	0.05	0.07	0.08	0.07	0.08	0.05	0.04	0.04	0.04	0.03	0.04	0.04	0.04	0.04	0.04	0.02	0.03	0.05	0.07	0.04	0.08	0.06	0.07	0.07	0.07	0.03	0.12	0.07	0.04
cg02104644	AP003108.3-4	Pure Island	Within	0.12	0.09	0.06	0.13	0.06	0.06	0.08	0.06	0.06	0.05	0.05	0.54	0.92	0.55	0.78	0.07	0.08	0.06	0.42	0.52	0.71	0.87	0.6	0.04	0.1	0.05	0.84	0.79	0.04	0.2	0.16	0.66	0.08	0.16	0.25	0.58	0.06	0.79	0.86	0.77	0.85	0.08	0.29	0.75	0.3	0.85
cg02105377	AC121493.1	Pure Island	Within	0.08	0.06	0.04	0.06	0.02	0.01	0.02	0.02	0.01	0.01	0.03	0.03	0.03	0.03	0.07	0.05	0.08	0.05	0.08	0.08	0.08	0.08	0.01	0.13	0.02	0.02	0.02	0.01	0.01	0.01	0.02	0.01	0.02	0.02	0.02	0.03	0.06	0.03	0.02	0.03	0.02	0.03	0.02	0.03	0.04	0.02
cg02121943	TBX3	Pure Island	Within	0.14	0.13	0.11	0.16	0.08	0.1	0.09	0.09	0.1	0.14	0.06	0.21	0.12	0.08	0.19	0.14	0.22	0.09	0.19	0.14	0.12	0.12	0.06	0.06	0.07	0.08	0.11	0.06	0.07	0.06	0.08	0.07	0.07	0.07	0.08	0.09	0.11	0.09	0.08	0.11	0.47	0.15	0.38	0.16	0.24	0.43
cg02128567	KCNK5	Pure Island	Within	0.06	0.07	0.06	0.02	0.03	0.03	0.03	0.03	0.04	0.03	0.08	0.04	0.04	0.03	0.94	0.05	0.05	0.05	0.63	0.07	0.06	0.07	0.21	0.03	0.02	0.02	0.03	0.51	0.03	0.02	0.08	0.02	0.23	0.02	0.03	0.03	0.05	0.04	0.03	0.07	0.03	0.04	0.03	0.08	0.35	0.03
cg02131967	ACE	Pure Island	Within	0.04	0.08	0.08	0.01	0.03	0.03	0.04	0.03	0.03	0.01	0.24	0.88	0.08	0.95	0.77	0.83	0.89	0.48	0.19	0.08	0.45	0.05	0.45	0.02	0.53	0.84	0.02	0.52	0.64	0.87	0.03	0.96	0.04	0.32	0.2	0.87	0.34	0.05	0.02	0.96	0.8	0.04	0.92	0.45	0.88	0.49
cg02144933	AC080164.6	Associated Island	Within	0.03	0.03	0.02	0.04	0.03	0.05	0.03	0.04	0.02	0.02	0.15	0.8	0.72	0.72	0.97	0.71	0.92	0.51	0.63	0.56	0.93	0.96	0.96	0.02	0.97	0.92	0.02	0.96	0.02	0.89	0.41	0.97	0.98	0.92	0.97	0.66	0.95	0.97	0.97	0.17	0.98	0.04	0.96	0.87	0.52	0.93
cg02154186	PNMA2	Pure Island	Within	0.13	0.14	0.07	0.06	0.07	0.07	0.07	0.1	0.07	0.07	0.1	0.08	0.93	0.63	0.53	0.36	0.44	0.1	0.26	0.44	0.86	0.95	0.04	0.03	0.06	0.6	0.05	0.03	0.06	0.04	0.13	0.58	0.05	0.12	0.42	0.22	0.27	0.87	0.82	0.96	0.44	0.06	0.07	0.91	0.08	0.04
cg02154956	PCCA	Pure Island	Within	0.03	0.04	0.03	0.02	0.02	0.02	0.05	0.02	0.02	0.02	0.02	0.03	0.97	0.03	0.05	0.05	0.04	0.03	0.06	0.05	0.05	0.05	0.01	0.01	0.02	0.02	0.02	0.01	0.01	0.02	0.02	0.02	0.01	0.01	0.03	0.02	0.05	0.03	0.02	0.03	0.02	0.04	0.01	0.03	0.03	0.02
cg02194878	EPHA8	Pure Island	Within	0.03	0.04	0.04	0.02	0.03	0.06	0.03	0.03	0.02	0.01	0.04	0.05	0.95	0.18	0.19	0.68	0.23	0.05	0.29	0.06	0.94	0.97	0.42	0.03	0.04	0.97	0.73	0.46	0.02	0.02	0.05	0.32	0.01	0.02	0.96	0.97	0.45	0.43	0.97	0.92	0.44	0.04	0.49	0.94	0.71	0.5
cg02200584	PDGFC	Pure Island	Within	0.16	0.17	0.06	0.09	0.04	0.07	0.05	0.05	0.06	0.06	0.05	0.87	0.09	0.06	0.18	0.11	0.14	0.11	0.13	0.22	0.89	0.88	0.04	0.04	0.05	0.04	0.11	0.04	0.04	0.04	0.04	0.06	0.09	0.06	0.87	0.06	0.44	0.07	0.42	0.05	0.12	0.09	0.06	0.43	0.06	0.04
cg02204046	MYCN	Pure Island	Within	0.11	0.1	0.07	0.03	0.04	0.04	0.07	0.06	0.05	0.03	0.07	0.07	0.07	0.75	0.55	0.23	0.08	0.13	0.34	0.28	0.16	0.91	0.43	0.08	0.25	0.08	0.02	0.44	0.03	0.41	0.23	0.62	0.11	0.03	0.02	0.05	0.57	0.05	0.06	0.1	0.65	0.07	0.09	0.85	0.11	0.1
cg02205739	PRRX2	Pure Island	Within	0.07	0.08	0.04	0.12	0.05	0.05	0.06	0.05	0.06	0.11	0.04	0.36	0.54	0.2	0.21	0.62	0.26	0.16	0.25	0.17	0.68	0.71	0.3	0.05	0.52	0.91	0.06	0.06	0.28	0.37	0.1	0.84	0.17	0.35	0.1	0.28	0.14	0.51	0.45	0.37	0.27	0.07	0.57	0.13	0.72	0.05
cg02216250	OCLN	Pure Island	Within	0.08	0.09	0.05	0.12	0.04	0.04	0.04	0.05	0.03	0.06	0.03	0.4	0.21	0.05	0.5	0.06	0.12	0.06	0.08	0.11	0.08	0.11	0.04	0.02	0.02	0.02	0.04	0.03	0.02	0.03	0.02	0.15	0.07	0.03	0.03	0.06	0.04	0.02	0.03	0.03	0.23	0.05	0.04	0.07	0.06	0.08
cg02238826	B3GNT5	Pure Island	Within	0.07	0.06	0.05	0.05	0.03	0.04	0.04	0.04	0.04	0.07	0.03	0.05	0.04	0.03	0.13	0.26	0.08	0.83	0.06	0.07	0.07	0.07	0.03	0.02	0.03	0.15	0.04	0.02	0.02	0.03	0.03	0.04	0.09	0.06	0.03	0.03	0.05	0.03	0.04	0.03	0.04	0.04	0.03	0.11	0.07	0.03
cg02248486	HOXA5	Pure Island	Within	0.11	0.12	0.12	0.18	0.08	0.1	0.06	0.08	0.08	0.2	0.05	0.05	0.05	0.08	0.91	0.1	0.1	0.95	0.13	0.09	0.42	0.15	0.13	0.95	0.2	0.04	0.4	0.09	0.93	0.91	0.29	0.93	0.58	0.93	0.21	0.94	0.48	0.33	0.32	0.92	0.92	0.31	0.91	0.74	0.87	0.05
cg02257681	DDAH2	Pure Island	Within	0.11	0.09	0.05	0.07	0.04	0.03	0.03	0.03	0.04	0.04	0.03	0.04	0.05	0.03	0.24	0.05	0.08	0.05	0.11	0.08	0.11	0.08	0.03	0.46	0.02	0.03	0.05	0.02	0.03	0.03	0.03	0.03	0.07	0.04	0.03	0.41	0.03	0.05	0.08	0.04	0.05	0.04	0.02	0.09	0.05	0.04
cg02282237	PRKCH	Pure Island	Within	0.05	0.07	0.07	0.02	0.03	0.03	0.02	0.03	0.04	0.02	0.02	0.04	0.03	0.03	0.33	0.04	0.04	0.04	0.48	0.2	0.79	0.89	0.1	0.02	0.3	0.03	0.03	0.08	0.03	0.44	0.02	0.32	0.16	0.07	0.03	0.19	0.04	0.02	0.13	0.05	0.46	0.03	0.03	0.38	0.11	0.28
cg02320454	GPR150	Pure Island	Within	0.15	0.18	0.1	0.05	0.06	0.1	0.05	0.11	0.06	0.06	0.15	0.83	0.08	0.55	0.7	0.66	0.77	0.59	0.46	0.56	0.83	0.84	0.51	0.04	0.63	0.86	0.06	0.39	0.09	0.16	0.43	0.92	0.06	0.56	0.91	0.49	0.44	0.06	0.58	0.06	0.71	0.05	0.08	0.74	0.5	0.05
cg02361557	NTNG1	Pure Island	Within	0.05	0.05	0.04	0.02	0.04	0.03	0.04	0.04	0.03	0.03	0.03	0.51	0.06	0.33	0.06	0.81	0.1	0.05	0.53	0.46	0.87	0.86	0.2	0.02	0.07	0.88	0.02	0.31	0.07	0.18	0.43	0.36	0.97	0.09	0.89	0.88	0.88	0.32	0.89	0.45	0.88	0.07	0.61	0.74	0.79	0.76
cg02364642	GEFT	Pure Island	Within	0.08	0.08	0.07	0.15	0.06	0.06	0.04	0.06	0.04	0.02	0.1	0.12	0.89	0.21	0.32	0.64	0.84	0.13	0.87	0.15	0.93	0.92	0.3	0.12	0.27	0.54	0.05	0.44	0.46	0.57	0.09	0.66	0.09	0.08	0.9	0.94	0.93	0.89	0.95	0.96	0.73	0.29	0.71	0.88	0.57	0.21
cg02387679	AC093251.2-2	Pure Island	Within	0.08	0.11	0.07	0.11	0.14	0.09	0.09	0.1	0.11	0.12	0.08	0.83	0.05	0.68	0.89	0.86	0.83	0.08	0.16	0.48	0.87	0.87	0.12	0.77	0.27	0.89	0.9	0.37	0.09	0.29	0.19	0.54	0.79	0.04	0.24	0.03	0.06	0.04	0.13	0.04	0.95	0.14	0.04	0.81	0.92	0.38
cg02397514	HES4	Pure Island	Within	0.11	0.05	0.04	0.02	0.03	0.02	0.03	0.02	0.02	0.01	0.03	0.95	0.94	0.08	0.35	0.04	0.06	0.03	0.05	0.05	0.05	0.07	0.02	0.02	0.02	0.02	0.01	0.02	0.19	0.02	0.02	0.05	0.02	0.08	0.02	0.02	0.05	0.02	0.02	0.02	0.08	0.03	0.02	0.06	0.04	0.02
cg02400248	CDKN2B	Pure Island	Within	0.02	0.02	0.02	0.02	0.02	0.02	0.02	0.02	0.02	0.01	0.01	0.05	0.24	0.47	NA	0.05	0.03	0.02	0.05	0.02	0.02	0.02	0.01	0.01	NA	0.02	0.02	0.01	0.01	NA	0.42	NA	0.01	0.01	0.01	0.01	0.03	0.01	0.01	0.01	NA	NA	NA	0.06	0.38	0.48
cg02404843	GPRIN1	Pure Island	Within	0.05	0.06	0.04	0.03	0.02	0.02	0.02	0.02	0.02	0.02	0.02	0.03	0.03	0.02	0.08	0.03	0.06	0.03	0.07	0.06	0.04	0.04	0.02	0.02	0.02	0.02	0.02	0.01	0.02	0.02	0.02	0.02	0.01	0.02	0.02	0.01	0.04	0.02	0.02	0.03	0.02	0.03	0.01	0.04	0.03	0.02
cg02409282	ULBP1	Pure Island	Within	0.09	0.14	0.09	0.05	0.07	0.06	0.06	0.08	0.06	0.06	0.05	0.9	0.13	0.42	0.41	0.08	0.15	0.11	0.16	0.14	0.27	0.32	0.15	0.07	0.05	0.06	0.04	0.04	0.04	0.05	0.15	0.38	0.05	0.36	0.07	0.19	0.27	0.46	0.33	0.87	0.33	0.11	0.26	0.11	0.86	0.11
cg02409351	ALX1	Pure Island	Within	0.08	0.16	0.1	0.1	0.06	0.07	0.04	0.05	0.05	0.07	0.12	0.83	0.93	0.8	0.86	0.85	0.23	0.42	0.77	0.82	0.82	0.86	0.27	0.9	0.03	0.92	0.03	0.03	0.08	0.3	0.47	0.21	0.93	0.09	0.92	0.8	0.83	0.9	0.92	0.92	0.92	0.53	0.91	0.78	0.83	0.41
cg02413850	SLC35C2	Pure Island	Within	0.13	0.05	0.06	0.03	0.03	0.03	0.04	0.03	0.03	0.03	0.06	0.06	0.05	0.05	0.18	0.05	0.44	0.05	0.07	0.06	0.48	0.88	0.02	0.02	0.03	0.03	0.05	0.05	0.03	0.05	0.02	0.14	0.02	0.03	0.3	0.43	0.15	0.18	0.94	0.1	0.14	0.05	0.03	0.13	0.63	0.04
cg02416716	ZNF215	Pure Island	Within	0.04	0.04	0.04	0.04	0.02	0.03	0.03	0.03	0.03	0.02	0.03	0.03	0.92	0.03	0.08	0.29	0.13	0.04	0.04	0.05	0.05	0.04	0.05	0.02	0.03	0.6	0.02	0.02	0.02	0.02	0.02	0.02	0.2	0.03	0.8	0.02	0.05	0.66	0.02	0.31	0.04	0.03	0.02	0.05	0.05	0.02
cg02440177	ZNF702P	Pure Island	Within	0.04	0.05	0.03	0.04	0.03	0.04	0.02	0.03	0.03	0.02	0.12	0.97	0.94	0.39	0.84	0.55	0.04	0.04	0.94	0.96	0.94	0.04	0.01	0.12	0.97	0.02	0.56	0.44	0.58	0.16	0.38	0.98	0.96	0.06	0.65	0.01	0.11	0.97	0.08	0.26	0.98	0.03	0.66	0.54	0.04	0.96
cg02452985	BCL11B	Pure Island	Within	0.06	0.07	0.03	0.01	0.03	0.03	0.02	0.03	0.02	0.01	0.03	0.03	0.47	0.02	0.18	0.27	0.05	0.57	0.06	0.08	0.06	0.96	0.41	0.01	0.01	0.02	0.02	0.01	0.01	0.01	0.05	0.01	0.88	0.02	0.01	0.02	0.03	0.73	0.11	0.77	0.25	0.02	0.01	0.84	0.82	0.84
cg02503850	ADAMTS14	Pure Island	Within	0.06	0.04	0.03	0.02	0.03	0.03	0.03	0.05	0.03	0.02	0.04	0.92	0.15	0.1	0.21	0.51	0.41	0.1	0.05	0.05	0.92	0.93	0.1	0.02	0.4	0.59	0.47	0.5	0.02	0.03	0.18	0.1	0.77	0.03	0.03	0.98	0.96	0.74	0.98	0.74	0.19	0.04	0.95	0.06	0.12	0.13
cg02503970	ST3GAL1	Pure Island	Within	0.09	0.07	0.04	0.06	0.05	0.04	0.04	0.04	0.04	0.03	0.03	0.04	0.04	0.04	0.08	0.05	0.09	0.06	0.09	0.08	0.11	0.07	0.04	0.05	0.03	0.03	0.02	0.03	0.03	0.03	0.03	0.04	0.17	0.03	0.03	0.03	0.06	0.05	0.14	0.04	0.05	0.04	0.03	0.09	0.06	0.04
cg02505409	ANGPTL4	Pure Island	Within	0.07	0.06	0.04	0.08	0.05	0.03	0.04	0.05	0.04	0.08	0.03	0.73	0.05	0.03	NA	0.08	0.16	0.06	0.12	0.08	NA	0.2	0.02	0.03	0.03	0.1	0.06	0.04	0.02	0.02	0.03	0.12	0.05	0.03	0.03	0.04	0.05	0.08	0.04	0.04	0.03	0.07	0.04	0.18	0.09	0.03
cg02506426	AQP11	Pure Island	Within	0.1	0.08	0.1	0.06	0.07	0.08	0.06	0.08	0.06	0.05	0.09	0.09	0.08	0.09	0.27	0.12	0.1	0.08	0.2	0.1	0.09	0.09	0.07	0.08	0.08	0.09	0.05	0.06	0.08	0.07	0.08	0.08	0.05	0.07	0.06	0.06	0.1	0.08	0.08	0.1	0.09	0.1	0.08	0.27	0.15	0.08
cg02508567	TCF7L1	Pure Island	Within	0.16	0.1	0.17	0.05	0.03	0.03	0.03	0.03	0.03	0.02	0.12	0.44	0.16	0.18	0.7	0.34	0.07	0.07	0.84	0.45	0.95	0.96	0.09	0.05	0.14	0.45	0.3	0.05	0.06	0.03	0.09	0.14	0.02	0.1	0.98	0.98	0.93	0.79	0.98	0.44	0.25	0.19	0.4	0.23	0.05	0.14
cg02516388	ACSF2	Pure Island	Within	0.03	0.03	0.02	0.03	0.02	0.03	0.02	0.03	0.03	0.02	0.04	0.02	0.03	0.02	0.04	0.03	0.03	0.03	0.05	0.05	0.03	0.03	0.01	0.94	0.01	0.02	0.02	0.01	0.01	0.01	0.02	0.01	0.01	0.01	0.01	0.02	0.03	0.01	0.02	0.02	0.02	0.02	0.02	0.02	0.05	0.02
cg02532648	BTG3	Pure Island	Within	0.04	0.03	0.03	0.01	0.03	0.03	0.02	0.03	0.02	0.01	0.02	0.03	0.02	0.03	0.04	0.03	0.02	0.93	0.03	0.04	0.03	0.03	0.04	0.01	0.01	0.03	0.03	0.01	0.01	0.01	0.02	0.01	0.01	0.02	0.02	0.02	0.02	0.01	0.01	0.03	0.5	0.02	0.02	0.03	0.04	0.03
cg02536286	TFAP2C	Pure Island	Within	0.07	0.07	0.15	0.02	0.03	0.03	0.03	0.03	0.03	0.02	0.08	0.88	0.98	0.05	0.14	0.07	0.05	0.05	0.07	0.1	0.57	0.61	0.17	0.03	0.02	0.02	0.04	0.02	0.02	0.03	0.03	0.02	0.48	0.03	0.07	0.99	0.55	0.11	0.03	0.08	0.97	0.11	0.65	0.1	0.04	0.02
cg02537909	COBLL1	Pure Island	Within	0.06	0.04	0.04	0.01	0.03	0.03	0.03	0.03	0.04	0.02	0.02	0.03	0.07	0.03	0.05	0.04	0.05	0.04	0.1	0.05	0.08	0.05	0.01	0.01	0.02	0.03	0.02	0.08	0.02	0.01	0.02	0.02	0.01	0.02	0.02	0.02	0.06	0.01	0.02	0.02	0.26	0.03	0.02	0.07	0.05	0.03
cg02545192	TERT	Pure Island	Within	0.11	0.07	0.05	0.04	0.03	0.03	0.07	0.09	0.06	0.02	0.19	0.68	0.37	0.5	0.52	0.74	0.58	0.48	0.82	0.41	0.9	0.9	0.3	0.13	0.13	0.28	0.14	0.68	0.3	0.48	0.19	0.55	0.36	0.06	0.26	0.93	0.35	0.54	0.74	0.96	0.95	0.06	0.96	0.75	0.9	0.49
cg02564733	ADAMTS15	Pure Island	Within	0.09	0.12	0.07	0.05	0.05	0.05	0.04	0.06	0.05	0.03	0.1	0.31	0.64	0.18	0.45	0.32	0.73	0.07	0.18	0.28	0.7	0.86	0.17	0.06	0.09	0.38	0.24	0.26	0.06	0.4	0.1	0.58	0.06	0.14	0.15	0.51	0.57	0.64	0.69	0.45	0.72	0.1	0.11	0.83	0.32	0.07
cg02582608	ALCAM	Pure Island	Within	0.11	0.07	0.04	0.06	0.04	0.04	0.04	0.05	0.04	0.05	0.03	0.04	0.04	0.04	0.06	0.04	0.06	0.03	0.14	0.09	0.06	0.06	0.03	0.02	0.03	0.03	0.05	0.04	0.03	0.03	0.03	0.02	0.08	0.02	0.03	0.05	0.04	0.27	0.03	0.04	0.81	0.08	0.03	0.06	0.08	0.06
cg02583151	SIX1	Pure Island	Within	0.07	0.07	0.08	0.1	0.07	0.11	0.06	0.07	0.06	0.05	0.05	0.07	0.59	0.07	0.1	0.49	0.11	0.59	0.11	0.09	0.91	0.93	0.05	0.06	0.06	0.36	0.06	0.05	0.05	0.04	0.06	0.06	0.03	0.06	0.51	0.53	0.52	0.07	0.61	0.06	0.07	0.07	0.29	0.11	0.09	0.06
cg02590345	PPAPR3	Pure Island	Within	0.06	0.07	0.05	0.03	0.05	0.05	0.05	0.05	0.05	0.02	0.07	0.05	0.91	0.41	0.61	0.07	0.61	0.06	0.18	0.09	0.82	0.87	0.34	0.05	0.07	0.08	0.15	0.32	0.05	0.09	0.05	0.08	0.03	0.48	0.04	0.47	0.4	0.43	0.89	0.55	0.84	0.05	0.59	0.48	0.27	0.2
cg02599225	RP11-369J21.6	Pure Island	Within	0.05	0.06	0.03	0.03	0.04	0.04	0.03	0.04	0.03	0.04	0.03	0.03	0.03	0.03	0.05	0.04	0.05	0.04	0.05	0.05	0.05	0.34	0.02	0.02	0.02	0.02	0.02	0.03	0.02	0.02	0.02	0.02	0.02	0.02	0.02	0.07	0.22	0.03	0.09	0.04	0.02	0.02	0.02	0.06	0.04	0.02
cg02604290	CYP24A1	Pure Island	Within	0.14	0.2	0.12	0.11	0.08	0.08	0.07	0.07	0.07	0.12	0.14	0.28	0.81	0.19	0.48	0.26	0.18	0.09	0.23	0.19	0.63	0.87	0.21	0.26	0.04	0.36	0.03	0.26	0.06	0.12	0.07	0.16	0.22	0.05	0.12	0.15	0.17	0.33	0.49	0.57	0.23	0.1	0.84	0.16	0.33	0.03
cg02608019	SYK	Pure Island	Within	0.09	0.11	0.05	0.03	0.06	0.05	0.03	0.04	0.04	0.02	0.02	0.83	0.07	0.05	0.55	0.06	0.07	0.05	0.09	0.1	0.1	0.46	0.66	0.03	0.13	0.04	0.06	0.73	0.03	0.03	0.04	0.59	0.04	0.17	0.05	0.02	0.08	0.04	0.03	0.06	0.91	0.06	0.03	0.05	0.15	0.09
cg02622316	ZSCAN12	Pure Island	Within	0.1	0.11	0.06	0.06	0.03	0.03	0.03	0.03	0.03	0.06	0.04	0.07	0.06	0.28	0.3	0.92	0.81	0.67	0.38	0.38	0.89	0.92	0.43	0.02	0.03	0.94	0.36	0.28	0.95	0.22	0.02	0.29	0.28	0.95	0.96	0.94	0.11	0.92	0.93	0.92	0.53	0.1	0.03	0.82	0.38	0.03
cg02624129	SNX19	Pure Island	Within	0.13	0.13	0.14	0.04	0.17	0.17	0.17	0.11	0.09	0.05	0.05	0.14	0.04	0.08	0.22	0.15	0.08	0.08	0.08	0.09	0.2	0.58	0.03	0.02	0.02	0.2	0.05	0.12	0.11	0.03	0.12	0.24	0.02	0.05	0.03	0.1	0.14	0.14	0.06	0.12	0.13	0.1	0.02	0.15	0.06	0.02
cg02661879	FLNC	Pure Island	Within	0.06	0.05	0.03	0.04	0.03	0.02	0.02	0.02	0.02	0.02	0.02	0.03	0.04	0.19	0.44	0.89	0.34	0.05	0.33	0.08	0.88	0.88	0.15	0.96	0.95	0.94	0.97	0.03	0.44	0.13	0.04	0.02	0.05	0.41	0.96	0.93	0.89	0.02	0.95	0.68	0.96	0.03	0.96	0.21	0.05	0.03
cg02681442	FOXG1B	Pure Island	Within	0.14	0.18	0.06	0.19	0.06	0.08	0.06	0.09	0.07	0.07	0.07	0.87	0.89	0.35	0.8	0.55	0.73	0.62	0.3	0.21	0.82	0.79	0.09	0.14	0.45	0.88	0.92	0.1	0.9	0.23	0.04	0.81	0.05	0.04	0.88	0.91	0.83	0.85	0.77	0.89	0.88	0.83	0.85	0.47	0.72	0.06
cg02699167	FBXL2	Pure Island	Within	0.15	0.09	0.06	0.02	0.03	0.03	0.03	0.03	0.02	0.02	0.05	0.05	0.04	0.03	0.1	0.06	0.11	0.06	0.11	0.1	0.94	0.95	0.02	0.02	0.02	0.03	0.03	0.02	0.02	0.02	0.03	0.02	0.02	0.02	0.04	0.03	0.96	0.03	0.02	0.04	0.05	0.04	0.03	0.06	0.1	0.03
cg02718725	CNN3	Pure Island	Within	0.14	0.14	0.09	0.07	0.06	0.1	0.07	0.07	0.08	0.08	0.07	0.07	0.86	0.09	0.1	0.75	0.17	0.09	0.78	0.13	0.5	0.1	0.19	0.05	0.06	0.84	0.06	0.05	0.06	0.48	0.49	0.86	0.07	0.07	0.08	0.4	0.13	0.08	0.06	0.07	0.88	0.11	0.43	0.11	0.13	0.06
cg02725014	HOMER1	Pure Island	Within	0.08	0.07	0.07	0.06	0.07	0.05	0.07	0.06	0.05	0.03	0.09	0.09	0.07	0.09	0.1	0.12	0.08	0.08	0.09	0.08	0.09	0.11	0.06	0.06	0.07	0.06	0.04	0.07	0.06	0.07	0.06	0.07	0.03	0.07	0.09	0.09	0.14	0.13	0.08	0.14	0.07	0.08	0.06	0.22	0.09	0.05
cg02740947	RAD51L3	Pure Island	Within	0.07	0.07	0.07	0.04	0.06	0.05	0.1	0.05	0.04	0.03	0.08	0.09	0.04	0.06	0.17	0.06	0.14	0.09	0.21	0.13	0.12	0.06	0.14	0.24	0.05	0.05	0.05	0.59	0.8	0.06	0.08	0.04	0.23	0.04	0.07	0.04	0.28	0.03	0.46	0.43	0.32	0.05	0.05	0.07	0.15	0.09
cg02742971	OSR1	Pure Island	Within	0.04	0.05	0.03	0.05	0.03	0.03	0.03	0.03	0.03	0.03	0.05	0.42	0.04	0.07	0.82	0.93	0.31	0.89	0.15	0.08	0.1	0.95	0.07	0.02	0.02	0.96	0.29	0.07	0.02	0.02	0.03	0.04	0.02	0.02	0.02	0.03	0.04	0.19	0.04	0.29	0.02	0.03	0.49	0.44	0.04	0.32
cg02748539	SLC9A3	Pure Island	Within	0.04	0.04	0.05	0.04	0.04	0.04	0.05	0.1	0.05	0.03	0.11	0.57	0.83	0.7	0.56	0.85	0.83	0.68	0.79	0.43	0.96	0.96	0.71	0.01	0.44	0.92	0.03	0.41	0.27	0.04	0.36	0.86	0.84	0.03	0.04	0.98	0.92	0.81	0.97	0.45	0.96	0.04	0.23	0.91	0.86	0.92
cg02765328	CCND2	Pure Island	Within	0.22	0.21	0.08	0.02	0.03	0.04	0.03	0.04	0.02	0.04	0.02	0.06	0.08	0.08	0.36	0.81	0.58	0.12	0.36	0.21	0.23	0.22	0.12	0.03	0.06	0.9	0.03	0.14	0.25	0.03	0.24	0.18	0.55	0.02	0.16	0.02	0.6	0.04	0.43	0.63	0.45	0.04	0.96	0.91	0.08	0.49
cg02774439	HAND2	Pure Island	Within	0.09	0.09	0.07	0.08	0.08	0.11	0.09	0.09	0.09	0.16	0.21	0.07	0.91	0.7	0.22	0.7	0.6	0.16	0.84	0.65	0.93	0.87	0.3	0.92	0.06	0.88	0.55	0.08	0.03	0.47	0.21	0.47	0.13	0.94	0.92	0.55	0.82	0.92	0.77	0.49	0.92	0.06	0.86	0.75	0.77	0.76
cg02780295	PCDHGA12	Pure Island	Within	0.15	0.1	0.06	0.09	0.04	0.06	0.04	0.04	0.05	0.1	0.04	0.07	0.07	0.05	0.14	0.07	0.1	0.07	0.33	0.12	0.94	0.96	0.17	0.03	0.04	0.03	0.78	0.5	0.03	0.03	0.03	0.05	0.99	0.89	0.95	0.12	0.16	0.96	0.96	0.1	0.05	0.08	0.27	0.88	0.67	0.95
cg02787991	SECTM1	Pure Island	Within	0.09	0.14	0.06	0.05	0.03	0.05	0.03	0.04	0.06	0.08	0.1	0.96	0.33	0.03	0.93	0.83	0.07	0.05	0.41	0.11	0.1	0.09	0.19	0.02	0.97	0.44	0.04	0.15	0.97	0.01	0.09	0.28	0.98	0.33	0.05	0.04	0.05	0.98	0.03	0.06	0.06	0.19	0.55	0.05	0.14	0.03
cg02788090	SOX9	Pure Island	Within	0.08	0.12	0.06	0.09	0.05	0.04	0.03	0.05	0.03	0.09	0.04	0.06	0.92	0.04	0.19	0.38	0.07	0.07	0.08	0.09	0.17	0.85	0.03	0.03	0.03	0.41	0.04	0.02	0.02	0.03	0.05	0.04	0.06	0.08	0.03	0.05	0.06	0.18	0.06	0.08	0.18	0.05	0.04	0.1	0.26	0.04
cg02788102	CADM1	Pure Island	Within	0.1	0.13	0.06	0.05	0.08	0.09	0.07	0.08	0.07	0.03	0.12	0.22	0.96	0.35	0.11	0.09	0.91	0.08	0.11	0.11	0.96	0.07	0.16	0.03	0.03	0.05	0.07	0.05	0.03	0.03	0.06	0.05	0.07	0.03	0.25	0.05	0.96	0.03	0.04	0.05	0.96	0.05	0.12	0.71	0.11	0.31
cg02861781	GJB2	Pure Island	Within	0.11	0.1	0.07	0.09	0.03	0.04	0.03	0.03	0.03	0.03	0.14	0.93	0.05	0.16	0.88	0.86	0.67	0.83	0.4	0.53	0.59	0.8	0.74	0.05	0.67	0.95	0.07	0.12	0.04	0.3	0.05	0.95	0.06	0.02	0.59	0.05	0.17	0.96	0.03	0.14	0.83	0.05	0.45	0.55	0.12	0.11
cg02865818	WWC1	Pure Island	Within	0.04	0.04	0.02	0.05	0.04	0.04	0.03	0.04	0.03	0.02	0.03	0.02	0.02	0.02	0.05	0.03	0.06	0.03	0.04	0.04	0.05	0.04	0.01	0.08	0.01	0.01	0.02	0.01	0.01	0.01	0.02	0.01	0.02	0.01	0.01	0.01	0.02	0.01	0.01	0.02	0.03	0.03	0.01	0.05	0.06	0.02
cg02873524	PAPPA	Associated Island	Within	0.04	0.06	0.04	0.03	0.03	0.04	0.04	0.04	0.05	0.02	0.04	0.04	0.34	0.04	0.05	0.55	0.06	0.43	0.3	0.12	0.81	0.89	0.03	0.07	0.03	0.55	0.04	0.05	0.03	0.02	0.04	0.02	0.02	0.03	0.93	0.54	0.88	0.09	0.88	0.67	0.29	0.05	0.43	0.72	0.18	0.03
cg02879662	HIF3A	Pure Island	Within	0.06	0.07	0.04	0.02	0.06	0.06	0.07	0.05	0.06	0.02	0.07	0.97	0.96	0.59	0.29	0.95	0.93	0.86	0.58	0.47	0.57	0.94	0.61	0.02	0.82	0.97	0.11	0.39	0.22	0.02	0.26	0.73	0.03	0.03	0.97	0.22	0.96	0.98	0.98	0.16	0.99	0.05	0.36	0.95	0.09	0.62
cg02886284	CPE	Pure Island	Within	0.08	0.07	0.04	0.03	0.04	0.04	0.03	0.03	0.03	0.02	0.03	0.03	0.56	0.03	0.1	0.05	0.07	0.05	0.14	0.09	0.87	0.9	0.03	0.02	0.03	0.03	0.06	0.02	0.02	0.02	0.03	0.02	0.03	0.03	0.95	0.51	0.95	0.04	0.43	0.52	0.04	0.04	0.03	0.06	0.06	0.03
cg02890926	C1orf228	Pure Island	Within	0.05	0.04	0.03	0.02	0.03	0.02	0.02	0.02	0.02	0.02	0.02	0.03	0.53	0.02	0.38	0.04	0.06	0.03	0.1	0.05	0.05	0.04	0.02	0.02	0.02	0.02	0.03	0.02	0.01	0.02	0.02	0.02	0.02	0.02	0.02	0.02	0.05	0.03	0.02	0.02	0.02	0.02	0.02	0.1	0.04	0.03
cg02899772	EFCBP2	Pure Island	Within	0.14	0.14	0.08	0.1	0.04	0.06	0.04	0.06	0.05	0.03	0.03	0.18	0.59	0.41	0.47	0.78	0.84	0.91	0.67	0.83	0.82	0.9	0.32	0.04	0.94	0.67	0.42	0.44	0.94	0.87	0.78	0.91	0.88	0.05	0.95	0.46	0.88	0.93	0.89	0.68	0.92	0.11	0.37	0.5	0.74	0.8
cg02906238	TFCP2L1	Pure Island	Within	0.09	0.11	0.13	0.03	0.05	0.06	0.06	0.05	0.05	0.04	0.05	0.93	0.08	0.07	0.61	0.64	0.09	0.08	0.1	0.1	0.08	0.47	0.22	0.05	0.05	0.54	0.03	0.14	0.06	0.1	0.07	0.37	0.03	0.07	0.05	0.04	0.16	0.16	0.07	0.07	0.1	0.07	0.05	0.07	0.1	0.09
cg02914379	MDFI	Pure Island	Within	0.05	0.09	0.11	0.12	0.02	0.02	0.03	0.02	0.02	0.02	0.02	0.05	0.55	0.03	0.15	0.8	0.82	0.68	0.82	0.75	0.09	0.45	0.54	0.85	0.91	0.81	0.83	0.87	0.84	0.81	0.24	0.9	0.54	0.87	0.31	0.87	0.86	0.89	0.88	0.3	0.87	0.65	0.48	0.8	0.45	0.62
cg02915261	LSR	Pure Island	Within	0.02	0.04	0.02	0.03	0.02	0.03	0.02	0.03	0.03	0.01	0.02	0.01	0.98	0.02	0.12	0.03	0.03	0.02	0.03	0.03	0.02	0.02	0.07	0.01	0.02	0.02	0.02	0.01	0.01	0.03	0.02	0.17	0.01	0.1	0.01	0.01	0.03	0.02	0.01	0.01	0.98	0.02	0.02	0.08	0.06	0.27
cg02915837	TEAD4	Pure Island	Within	0.06	0.06	0.07	0.04	0.12	0.1	0.11	0.11	0.1	0.04	0.07	0.06	0.06	0.08	0.06	0.08	0.09	0.09	0.08	0.07	0.05	0.06	0.03	0.03	0.03	0.06	0.04	0.03	0.04	0.04	0.06	0.03	0.03	0.03	0.03	0.03	0.09	0.04	0.03	0.07	0.1	0.08	0.05	0.18	0.2	0.09
cg02917064	SMARCD3	Pure Island	Within	NA	0.13	0.06	0.21	0.09	0.07	0.05	0.05	0.06	0.1	0.06	0.19	0.83	0.07	NA	0.47	0.43	0.09	0.23	NA	NA	NA	0.49	0.15	0.2	0.74	0.21	0.42	0.6	0.27	0.06	0.4	0.14	0.62	0.52	0.83	0.32	0.75	0.7	0.57	0.57	0.2	0.58	0.42	0.63	0.15
cg02929869	PFN2	Pure Island	Within	0.05	0.05	0.02	0.04	0.02	0.02	0.03	0.03	0.02	0.02	0.02	0.03	0.04	0.02	0.04	0.04	0.05	0.03	0.07	0.05	0.05	0.17	0.02	0.02	0.02	0.02	0.02	0.02	0.02	0.02	0.02	0.02	0.02	0.02	0.49	0.02	0.04	0.02	0.02	0.02	0.02	0.02	0.02	0.05	0.05	0.03
cg02936872	CTSL2	Pure Island	Within	0.07	0.08	0.04	0.02	0.03	0.03	0.03	0.03	0.03	0.02	0.02	0.03	0.03	0.03	0.2	0.04	0.06	0.05	0.05	0.07	0.08	0.04	0.01	0.01	0.01	0.02	0.02	0.01	0.02	0.01	0.02	0.02	0.01	0.01	0.02	0.02	0.04	0.01	0.02	0.02	0.02	0.03	0.02	0.03	0.05	0.03
cg02994974	SPON1	Pure Island	Within	0.03	0.03	0.02	0.1	0.04	0.04	0.04	0.07	0.09	0.02	0.18	0.5	0.73	0.44	0.26	0.54	0.22	0.46	0.64	0.42	0.91	0.86	0.46	0.04	0.73	0.48	0.77	0.37	0.9	0.44	0.22	0.62	0.02	0.06	0.44	0.02	0.49	0.04	0.8	0.6	0.93	0.27	0.51	0.61	0.53	0.19
cg03005055	HSPA2	Pure Island	Within	0.06	0.05	0.05	0.23	0.08	0.08	0.08	0.08	0.08	0.2	0.05	0.91	0.07	0.04	0.25	0.06	0.1	0.05	0.1	0.06	0.05	0.9	0.04	0.03	0.03	0.04	0.05	0.04	0.04	0.04	0.04	0.14	0.12	0.06	0.04	0.06	0.11	0.05	0.05	0.04	0.43	0.09	0.04	0.11	0.09	0.06
cg03014628	RAB3C	Pure Island	Within	0.06	0.07	0.04	0.02	0.03	0.03	0.04	0.04	0.03	0.02	0.05	0.03	0.04	0.14	0.15	0.06	0.19	0.05	0.07	0.08	0.83	0.89	0.16	0.02	0.02	0.03	0.02	0.11	0.02	0.02	0.02	0.04	0.02	0.02	0.83	0.07	0.16	0.04	0.87	0.27	0.12	0.03	0.02	0.51	0.37	0.6
cg03026462	FOXA1	Pure Island	Within	0.04	0.03	0.02	0.01	0.03	0.03	0.03	0.03	0.04	0.01	0.02	0.97	0.02	0.02	0.05	0.03	0.04	0.03	0.14	0.17	0.04	0.06	0.01	0.01	0.01	0.02	0.02	0.01	0.01	0.01	0.02	0.01	0.01	0.01	0.01	0.02	0.04	0.01	0.01	0.02	0.35	0.03	0.02	0.03	0.18	0.03
cg03028472	RERG	Pure Island	Within	0.06	0.07	0.07	0.03	0.05	0.06	0.04	0.05	0.04	0.04	0.04	0.87	0.67	0.04	0.52	0.06	0.1	0.06	0.53	0.27	0.87	0.89	0.58	0.03	0.03	0.04	0.03	0.05	0.04	0.03	0.03	0.03	0.02	0.43	0.9	0.54	0.89	0.68	0.92	0.06	0.6	0.07	0.05	0.13	0.09	0.65
cg03041841	C9orf75	Pure Island	Within	NA	0.1	0.05	0.17	0.05	0.06	0.06	0.06	0.05	0.12	0.12	0.07	0.66	0.2	0.48	0.04	0.17	0.03	0.19	NA	NA	0.05	0.03	0.54	0.5	0.04	0.55	0.14	0.87	0.04	0.11	0.04	0.88	0.03	0.02	0.15	0.06	0.33	0.05	0.12	0.14	0.11	0.07	0.83	0.07	0.1
cg03048535	FOXN4	Pure Island	Within	0.03	0.02	0.02	0.03	0.03	0.04	0.04	0.04	0.03	0.02	0.04	0.03	0.02	0.03	0.07	0.36	0.04	0.03	0.27	0.08	0.79	0.81	0.11	0.01	0.02	0.24	0.01	0.01	0.02	0.01	0.08	0.04	0.01	0.02	0.63	0.89	0.77	0.02	0.17	0.05	0.02	0.02	0.08	0.1	0.08	0.13
cg03050522	ARHGEF1	Pure Island	Within	0.15	0.17	0.07	0.08	0.08	0.09	0.09	0.08	0.09	0.12	0.07	0.81	0.11	0.07	0.15	0.55	0.86	0.31	0.27	0.16	0.52	0.14	0.94	0.06	0.07	0.57	0.98	0.48	0.31	0.06	0.06	0.15	0.1	0.9	0.19	0.91	0.13	0.63	0.55	0.37	0.94	0.09	0.56	0.24	0.45	0.08
cg03072378	DLX4	Pure Island	Within	0.03	0.06	0.03	0.05	0.05	0.04	0.05	0.05	0.05	0.03	0.04	0.65	0.06	0.08	0.09	0.16	0.08	0.03	0.14	0.08	0.87	0.87	0.02	0.06	0.04	0.08	0.01	0.02	0.02	0.02	0.04	0.08	0.03	0.04	0.02	0.41	0.43	0.11	0.33	0.38	0.07	0.03	0.26	0.11	0.44	0.03
cg03077062	SFXN5	Pure Island	Within	0.04	0.04	0.02	0.03	0.04	0.03	0.02	0.03	0.03	0.02	0.03	0.02	0.02	0.03	0.07	0.04	0.04	0.03	0.04	0.04	0.9	0.36	0.02	0.01	0.01	0.02	0.02	0.01	0.01	0.02	0.02	0.02	0.02	0.02	0.02	0.02	0.04	0.02	0.03	0.04	0.03	0.04	0.02	0.09	0.03	0.03
cg03077836	ASAP2	Pure Island	Within	0.22	0.06	0.03	0.02	0.03	0.03	0.03	0.03	0.02	0.01	0.02	0.96	0.04	0.03	0.06	0.04	0.07	0.04	0.15	0.06	0.04	0.04	0.02	0.02	0.02	0.03	0.02	0.02	0.02	0.02	0.02	0.03	0.01	0.02	0.02	0.03	0.06	0.02	0.04	0.02	0.02	0.04	0.02	0.06	0.05	0.03
cg03079681	CDKN2A	Pure Island	Within	0.14	0.15	0.1	0.06	0.06	0.05	0.04	0.05	0.05	0.05	0.03	0.86	0.09	0.52	0.58	0.13	0.12	0.1	0.16	0.19	0.73	0.83	0.02	0.02	0.5	0.04	0.05	0.03	0.02	0.49	0.52	0.62	0.02	0.03	0.03	0.94	0.07	0.03	0.93	0.04	0.55	0.5	0.48	0.25	NA	NA
cg03086857	EDNRB	Pure Island	Within	0.17	0.11	0.07	0.13	0.04	0.04	0.03	0.04	0.04	0.07	0.12	0.48	0.94	0.36	0.67	0.31	0.23	0.07	0.3	0.59	NA	0.71	0.84	0.46	0.43	0.7	0.72	0.21	0.18	0.06	0.06	0.41	0.88	0.9	0.66	0.42	0.36	0.84	0.21	0.88	0.84	0.61	0.51	0.43	0.21	0.22
cg03098643	FAT1	Pure Island	Within	0.09	0.08	0.07	0.06	0.13	0.13	0.12	0.13	0.12	0.08	0.07	0.06	0.96	0.09	0.07	0.11	0.11	0.6	0.08	0.1	0.07	0.09	0.06	0.05	0.05	0.08	0.07	0.05	0.06	0.05	0.08	0.05	0.08	0.06	0.05	0.07	0.13	0.07	0.06	0.08	0.06	0.09	0.07	0.18	0.14	0.1
cg03116238	GNG8	Pure Island	Within	0.04	0.04	0.05	0.06	0.07	0.07	0.04	0.06	0.04	0.04	0.05	0.78	0.05	0.05	0.93	0.11	0.51	0.06	0.52	0.6	0.93	0.59	0.08	0.01	0.02	0.05	0.1	0.61	0.08	0.02	0.03	0.49	0.05	0.39	0.26	0.96	0.7	0.88	0.62	0.58	0.98	0.08	0.54	0.66	0.65	0.37
cg03138668	SLC17A7	Pure Island	Within	0.06	0.07	0.04	0.2	0.07	0.06	0.06	0.07	0.05	0.09	0.03	0.06	0.08	0.06	0.08	0.09	0.29	0.06	0.07	0.06	0.82	NA	0.08	0.03	0.06	0.04	0.07	0.02	0.02	0.03	0.1	0.03	0.19	0.03	0.76	0.06	0.26	0.67	0.65	0.09	0.45	0.06	0.77	0.72	0.68	0.08
cg03152785	KCNC4	Pure Island	Within	0.1	0.09	0.04	0.05	0.03	0.03	0.03	0.03	0.02	0.02	0.03	0.05	0.05	0.04	0.13	0.06	0.06	0.06	0.07	0.08	0.12	0.07	0.03	0.03	0.03	0.04	0.02	0.03	0.03	0.03	0.04	0.03	0.03	0.03	0.03	0.02	0.12	0.03	0.19	0.18	0.04	0.06	0.05	0.13	0.06	0.03
cg03158400	FAM3B	Pure Island	Within	0.06	0.1	0.07	0.02	0.14	0.04	0.03	0.11	0.09	0.13	0.24	0.37	0.98	0.96	0.48	0.96	0.92	0.82	0.84	0.23	0.97	0.96	0.58	0.98	0.88	0.98	0.85	0.63	0.48	0.08	0.06	0.44	0.01	0.15	0.03	0.86	0.74	0.83	0.97	0.95	0.98	0.04	0.03	0.88	0.72	0.51
cg03160135	VGLL2	Pure Island	Within	0.1	0.13	0.13	0.06	0.07	0.1	0.12	0.13	0.07	0.06	0.19	0.06	0.9	0.26	0.74	0.85	0.83	0.63	0.51	0.72	0.87	0.89	0.28	0.21	0.45	0.84	0.42	0.34	0.07	0.33	0.08	0.45	0.04	0.1	0.9	0.55	0.84	0.75	0.91	0.89	0.88	0.22	0.82	0.86	0.82	0.3
cg03168582	DMRT1	Pure Island	Within	0.03	0.03	0.02	0.08	0.04	0.04	0.05	0.04	0.03	0.02	0.03	0.14	0.99	0.23	0.17	0.96	0.05	0.58	0.97	0.95	0.97	0.98	0.47	0.38	0.19	0.98	0.97	0.77	0.01	0.06	0.03	0.88	0.6	0.06	0.98	0.98	0.91	0.96	0.99	0.97	0.99	0.03	0.86	0.97	0.61	0.62
cg03169715	HAS3	Pure Island	Within	0.06	0.05	0.04	0.02	0.03	0.03	0.03	0.03	0.03	0.02	0.03	0.66	0.1	0.03	0.4	0.51	0.15	0.09	0.11	0.06	0.06	0.36	0.37	0.03	0.02	0.53	0.03	0.21	0.02	0.03	0.03	0.27	0.02	0.09	0.04	0.02	0.05	0.26	0.04	0.11	0.53	0.04	0.03	0.07	0.09	0.05
cg03192551	SLC25A39	Pure Island	Within	0.08	0.07	0.08	0.04	0.1	0.09	0.05	0.16	0.17	0.05	0.23	0.85	0.27	0.41	0.94	0.61	0.46	0.87	0.6	0.37	0.06	0.43	0.07	0.07	0.15	0.49	0.02	0.1	0.94	0.03	0.08	0.05	0.13	0.42	0.04	0.03	0.33	0.04	0.49	0.31	0.42	0.02	0.35	0.06	0.04	0.04
cg03214212	TSPAN13	Pure Island	Within	0.08	0.1	0.08	0.05	0.05	0.06	0.07	0.06	0.06	0.03	0.07	0.06	0.06	0.09	0.5	0.09	0.1	0.09	0.1	0.12	0.09	0.14	0.06	0.07	0.07	0.06	0.04	0.08	0.07	0.07	0.08	0.07	0.05	0.07	0.08	0.06	0.08	0.1	0.05	0.11	0.1	0.09	0.06	0.1	0.08	0.06
cg03238797	ADAMTS18	Pure Island	Within	0.06	0.09	0.08	0.02	0.03	0.03	0.03	0.04	0.03	0.02	0.03	0.52	0.94	0.45	0.71	0.87	0.5	0.07	0.84	0.38	0.78	0.83	0.66	0.03	0.87	0.94	0.02	0.39	0.02	0.9	0.93	0.94	0.27	0.02	0.96	0.75	0.75	0.95	0.93	0.93	0.97	0.96	0.57	0.86	0.85	0.66
cg03251079	HMGA2	Pure Island	Within	0.06	0.06	0.04	0.04	0.03	0.03	0.04	0.03	0.03	0.02	0.03	0.04	0.04	0.04	0.07	0.06	0.06	0.05	0.07	0.07	0.05	0.05	0.04	0.05	0.03	0.04	0.02	0.03	0.03	0.05	0.03	0.04	0.43	0.03	0.03	0.03	0.05	0.04	0.04	0.03	0.51	0.03	0.03	0.06	0.05	0.04
cg03259469	SVIL	Pure Island	Within	0.11	0.11	0.08	0.1	0.07	0.07	0.07	0.07	0.06	0.1	0.09	0.06	0.08	0.06	0.19	0.11	0.14	0.1	0.16	0.09	0.1	0.09	0.07	0.07	0.08	0.07	0.08	0.05	0.06	0.05	0.06	0.08	0.08	0.1	0.09	0.14	0.09	0.06	0.06	0.07	0.09	0.09	0.05	0.15	0.08	0.06
cg03285457	LBX1	Pure Island	Within	0.11	0.15	0.07	0.05	0.05	0.05	0.05	0.05	0.04	0.04	0.04	0.62	0.88	0.49	0.22	0.78	0.32	0.76	0.5	0.16	0.68	0.65	0.23	0.03	0.03	0.89	0.05	0.59	0.06	0.25	0.18	0.88	0.15	0.05	0.92	0.91	0.82	0.89	0.88	0.9	0.53	0.04	0.88	0.83	0.84	0.74
cg03290040	CHCHD10	Pure Island	Within	0.06	0.16	0.12	0.04	0.03	0.03	0.1	0.03	0.02	0.02	0.19	0.93	0.04	0.36	0.89	0.49	0.13	0.14	0.09	0.06	0.6	0.06	0.03	0.02	0.02	0.04	0.04	0.02	0.04	0.02	0.03	0.03	0.04	0.03	0.07	0.05	0.11	0.04	0.03	0.07	0.05	0.04	0.03	0.07	0.11	0.03
cg03294619	NKX2-5	Associated Island	Within	0.07	0.04	0.04	0.13	0.04	0.05	0.04	0.04	0.05	0.06	0.05	0.03	0.47	0.15	0.13	0.96	0.41	0.86	0.93	0.05	0.04	0.06	0.54	0.06	0.28	0.97	0.02	0.1	0.97	0.78	0.03	0.63	0.43	0.05	0.2	0.66	0.37	0.95	0.92	0.96	0.03	0.71	0.95	0.87	0.71	0.57
cg03310469	SIX2	Pure Island	Within	0.04	0.04	0.03	0.01	0.02	0.02	0.02	0.03	0.02	0.01	0.02	0.03	0.02	0.02	0.04	0.04	0.06	0.02	0.09	0.04	0.94	0.96	0.23	0.02	0.54	0.02	0.65	0.23	0.01	0.01	0.02	0.02	0.01	0.01	0.92	0.52	0.55	0.02	0.59	0.03	0.53	0.03	0.03	0.05	0.02	0.01
cg03328750	ARHGAP26	Pure Island	Within	0.03	0.03	0.02	0.09	0.07	0.06	0.06	0.07	0.06	0.05	0.05	0.02	0.02	0.05	0.05	0.05	0.06	0.05	0.06	0.03	0.2	0.04	0.02	0.04	0.02	0.05	0.01	0.02	0.02	0.02	0.03	0.02	0.03	0.02	0.02	0.01	0.06	0.01	0.02	0.04	0.08	0.03	0.03	0.43	0.06	0.05
cg03329165	CD200	No/Distant Island	Within	0.08	0.09	0.06	0.23	0.06	0.06	0.06	0.07	0.08	0.22	0.09	0.18	0.05	0.31	0.78	0.87	0.78	0.23	0.62	0.2	0.8	0.84	0.14	0.28	0.63	0.89	0.15	0.65	0.31	0.94	0.09	0.91	0.11	0.15	0.34	0.08	0.15	0.87	0.54	0.91	0.92	0.81	0.91	0.76	0.89	0.13
cg03332970	ESAM	Pure Island	Within	0.1	0.08	0.09	0.08	0.04	0.05	0.04	0.05	0.05	0.07	0.06	0.81	0.06	0.07	0.76	0.09	0.06	0.06	0.09	0.08	0.08	0.07	0.03	0.03	0.03	0.04	0.07	0.03	0.03	0.03	0.04	0.04	0.09	0.09	0.05	0.06	0.09	0.06	0.06	0.08	0.06	0.06	0.04	0.13	0.09	0.05
cg03354772	C10orf93	Pure Island	Within	0.09	0.06	0.09	0.19	0.06	0.08	0.09	0.07	0.06	0.08	0.1	0.44	0.31	0.28	0.13	0.75	0.31	0.31	0.77	0.32	NA	NA	0.32	0.04	0.19	0.79	0.79	0.53	0.78	0.34	0.14	0.85	0.14	0.08	0.49	0.83	0.52	0.79	0.52	0.86	0.88	0.17	0.87	0.7	0.56	0.23
cg03365354	MCAM	Pure Island	Within	0.05	0.06	0.05	0.02	0.03	0.04	0.03	0.03	0.03	0.02	0.11	0.03	0.09	0.03	0.08	0.13	0.07	0.06	0.07	0.07	0.76	0.93	0.29	0.02	0.04	0.05	0.91	0.46	0.03	0.02	0.04	0.02	0.02	0.18	0.19	0.12	0.05	0.51	0.84	0.2	0.95	0.16	0.04	0.08	0.35	0.04
cg03390211	RGS11	Pure Island	Within	0.09	0.07	0.04	0.02	0.02	0.02	0.02	0.02	0.02	0.01	0.02	0.69	0.98	0.04	0.11	0.63	0.07	0.04	0.1	0.07	0.93	0.04	0.14	0.03	0.27	0.98	0.03	0.33	0.07	0.02	0.02	0.9	0.02	0.63	0.02	0.05	0.06	0.04	0.41	0.06	0.98	0.03	0.09	0.82	0.17	0.02
cg03391040	ZNF420	Pure Island	Within	0.04	0.04	0.04	0.02	0.02	0.03	0.03	0.02	0.03	0.02	0.03	0.03	0.03	0.12	0.08	0.04	0.07	0.03	0.05	0.04	0.95	0.05	0.02	0.02	0.52	0.2	0.02	0.27	0.41	0.02	0.17	0.02	0.02	0.02	0.12	0.95	0.64	0.9	0.02	0.03	0.03	0.04	0.03	0.94	0.04	0.03
cg03402876	KCNF1	Pure Island	Within	0.04	0.04	0.03	0.04	0.02	0.03	0.02	0.02	0.02	0.03	0.02	0.02	0.02	0.05	0.13	0.03	0.04	0.03	0.1	0.07	0.89	0.86	0.02	0.01	0.02	0.02	0.01	0.01	0.01	0.01	0.02	0.02	0.01	0.01	0.04	0.45	0.04	0.03	0.41	0.02	0.21	0.04	0.02	0.29	0.34	0.03
cg03411288	C10orf47	Pure Island	Within	0.08	0.07	0.07	0.03	0.04	0.04	0.04	0.04	0.03	0.03	0.03	0.05	0.04	0.04	0.1	0.06	0.07	0.06	0.07	0.1	0.92	0.65	0.03	0.82	0.03	0.03	0.06	0.1	0.02	0.03	0.03	0.04	0.66	0.03	0.06	0.06	0.05	0.05	0.03	0.07	0.05	0.07	0.04	0.08	0.05	0.03
cg03425110	NEUROG3	Pure Island	Within	0.05	0.04	0.04	0.07	0.03	0.03	0.03	0.04	0.04	0.04	0.03	0.1	0.08	0.45	0.11	0.92	0.81	0.91	0.86	0.76	0.88	0.87	0.25	0.06	0.86	0.97	0.06	0.68	0.83	0.43	0.33	0.92	0.11	0.41	0.97	0.86	0.95	0.88	0.98	0.87	0.98	0.06	0.94	0.92	0.82	0.43
cg03437318	ERBB3	Pure Island	Within	0.1	0.08	0.04	0.03	0.05	0.03	0.04	0.04	0.04	0.02	0.03	0.13	0.62	0.04	0.28	0.06	0.14	0.05	0.11	0.08	0.07	0.47	0.61	0.06	0.13	0.03	0.8	0.43	0.06	0.22	0.03	0.11	0.95	0.47	0.04	0.04	0.05	0.04	0.04	0.05	0.89	0.11	0.03	0.07	0.05	0.22
cg03447931	BMP6	Pure Island	Within	0.11	0.07	0.07	0.04	0.03	0.03	0.04	0.05	0.05	0.02	0.03	0.05	0.06	0.04	0.08	0.22	0.15	0.11	0.1	0.1	0.96	0.96	0.12	0.02	0.02	0.13	0.02	0.02	0.02	0.02	0.02	0.03	0.02	0.02	0.98	0.53	0.59	0.05	0.97	0.17	0.05	0.04	0.2	0.94	0.49	0.03
cg03455458	VASH2	Pure Island	Within	0.03	0.03	0.04	0.22	0.05	0.05	0.05	0.06	0.06	0.03	0.07	0.05	0.1	0.14	0.05	0.78	0.6	0.28	0.85	0.49	0.58	0.75	0.32	0.02	0.71	0.71	0.03	0.11	0.14	0.03	0.07	0.64	0.86	0.03	0.39	0.14	0.68	0.05	0.81	0.36	0.07	0.03	0.15	0.84	0.16	0.05
cg03462055	TUBB2B	Pure Island	Within	0.13	0.12	0.11	0.04	0.03	0.03	0.04	0.03	0.03	0.03	0.1	0.12	0.88	0.55	0.94	0.09	0.21	0.09	0.11	0.17	0.94	0.96	0.05	0.02	0.18	0.11	0.04	0.03	0.02	0.12	0.06	0.06	0.02	0.04	0.92	0.6	0.92	0.06	0.94	0.44	0.39	0.06	0.08	0.95	0.95	0.03
cg03469054	TMEM132D	Pure Island	Within	0.12	0.1	0.09	0.12	0.05	0.06	0.04	0.08	0.07	0.07	0.24	0.09	0.91	0.56	0.33	0.5	0.51	0.09	0.8	0.79	0.55	0.78	0.73	0.8	0.73	0.33	0.83	0.79	0.41	0.58	0.56	0.82	0.4	0.31	0.88	0.12	0.63	0.85	0.87	0.91	0.91	0.3	0.34	0.68	0.8	0.69
cg03478689	EDIL3	Pure Island	Within	0.04	0.06	0.04	0.05	0.04	0.03	0.04	0.04	0.04	0.06	0.03	0.03	0.04	0.12	0.09	0.07	0.55	0.04	0.91	0.92	0.93	0.95	0.11	0.02	0.02	0.03	0.02	0.05	0.02	0.02	0.06	0.02	0.03	0.02	0.94	0.97	0.94	0.47	0.97	0.97	0.34	0.04	0.97	0.95	0.08	0.08
cg03495868	PTGFR	Pure Island	Within	0.08	0.05	0.05	0.17	0.05	0.05	0.05	0.05	0.05	0.13	0.05	0.05	0.86	0.22	0.12	0.73	0.07	0.18	0.74	0.42	0.79	0.8	0.11	0.05	0.1	0.68	0.04	0.2	0.04	0.04	0.04	0.04	0.27	0.85	0.82	0.76	0.82	0.76	0.32	0.86	0.87	0.66	0.83	0.81	0.09	0.05
cg03499052	FAM114A1	Pure Island	Within	0.05	0.06	0.04	0.03	0.05	0.04	0.04	0.04	0.04	0.02	0.03	0.05	0.06	0.03	0.07	0.05	0.07	0.05	0.08	0.07	0.05	0.06	0.04	0.03	0.03	0.04	0.03	0.03	0.03	0.03	0.03	0.04	0.03	0.1	0.03	0.04	0.04	0.03	0.03	0.04	0.04	0.04	0.04	0.1	0.06	0.04
cg03506684	GYG2	Pure Island	Within	0.12	0.12	0.06	0.09	0.08	0.07	0.08	0.07	0.06	0.03	0.14	0.05	0.07	0.35	0.55	0.11	0.07	0.09	0.13	0.06	0.88	0.82	0.11	0.03	0.02	0.06	0.03	0.02	0.02	0.01	0.03	0.03	0.06	0.02	0.03	0.07	0.04	0.04	0.52	0.05	0.67	0.05	0.05	0.66	0.18	0.03
cg03524627	CDC25B	Pure Island	Within	0.05	0.05	0.04	0.02	0.04	0.03	0.03	0.03	0.03	0.02	0.03	0.03	0.03	0.04	0.17	0.06	0.06	0.04	0.4	0.05	0.78	0.05	0.06	0.32	0.03	0.03	0.02	0.02	0.24	0.02	0.03	0.02	0.02	0.03	0.71	0.6	0.06	0.46	0.05	0.15	0.03	0.03	0.25	0.05	0.05	0.03
cg03544525	YOD1	Pure Island	Within	0.08	0.09	0.07	0.02	0.04	0.03	0.03	0.03	0.03	0.03	0.03	0.04	0.07	0.03	0.55	0.08	0.07	0.06	0.09	0.09	0.09	0.1	0.02	0.03	0.03	0.03	0.03	0.02	0.02	0.02	0.03	0.18	0.02	0.03	0.03	0.04	0.05	0.03	0.03	0.06	0.04	0.03	0.03	0.06	0.05	0.03
cg03556497	SLC32A1	Pure Island	Within	0.11	0.1	0.07	0.06	0.06	0.06	0.06	0.08	0.07	0.03	0.07	0.07	0.66	0.16	0.17	0.55	0.28	0.13	0.6	0.62	0.6	0.58	0.23	0.06	0.06	0.55	0.32	0.28	0.36	0.13	0.12	0.38	0.13	0.11	0.57	0.33	0.49	0.53	0.32	0.47	0.87	0.19	0.32	0.53	0.44	0.28
cg03591594	VLDLR	Pure Island	Within	0.09	0.11	0.07	0.1	0.04	0.04	0.03	0.06	0.04	0.05	0.03	0.07	0.08	0.03	0.11	0.08	0.11	0.08	0.14	0.13	0.87	0.87	0.03	0.02	0.02	0.03	0.1	0.03	0.03	0.03	0.03	0.03	0.05	0.04	0.03	0.77	0.1	0.04	0.04	0.05	0.05	0.09	0.04	0.74	0.07	0.03
cg03593419	GABRA4	Pure Island	Within	0.04	0.03	0.05	0.08	0.04	0.03	0.03	0.03	0.03	0.02	0.05	0.05	0.85	0.24	0.15	0.24	0.08	0.08	0.21	0.12	0.43	0.34	0.19	0.01	0.05	0.32	0.18	0.14	0.01	0.03	0.07	0.13	0.3	0.03	0.19	0.07	0.13	0.35	0.26	0.2	0.13	0.05	0.1	0.23	0.14	0.07
cg03608167	CXCR4	Pure Island	Within	0.05	0.06	0.05	0.07	0.03	0.04	0.03	0.03	0.03	0.05	0.05	0.78	0.04	0.1	0.21	0.05	0.09	0.03	0.07	0.07	0.76	0.8	0.08	0.02	0.03	0.03	0.03	0.02	0.02	0.02	0.03	0.09	0.04	0.03	0.54	0.04	0.22	0.04	0.81	0.84	0.06	0.04	0.7	0.12	0.1	0.31
cg03611555	SLC25A21	Pure Island	Within	0.02	0.02	0.02	0.02	0.03	0.02	0.02	0.03	0.02	0.02	0.02	0.31	0.97	0.03	0.05	0.04	0.03	0.02	0.31	0.07	0.95	0.03	0.01	0.01	0.01	0.02	0.01	0.01	0.01	0.01	0.02	0.01	0.01	0.01	0.02	0.01	0.93	0.01	0.96	0.02	0.07	0.02	0.02	0.08	0.03	0.02
cg03614513	TSPAN2	Pure Island	Within	0.08	0.12	0.08	0.05	0.05	0.05	0.06	0.04	0.05	0.03	0.06	0.89	0.6	0.05	0.27	0.55	0.09	0.09	0.14	0.55	0.09	0.92	0.47	0.28	0.04	0.53	0.04	0.06	0.05	0.05	0.06	0.06	0.04	0.13	0.05	0.04	0.52	0.04	0.5	0.06	0.68	0.89	0.04	0.51	0.15	0.06
cg03616357	MAP9	Associated Island	Within	0.11	0.12	0.08	0.02	0.04	0.03	0.04	0.05	0.04	0.04	0.04	0.05	0.45	0.04	0.3	0.15	0.12	0.06	0.88	0.95	0.94	0.95	0.43	0.02	0.03	0.53	0.03	0.02	0.02	0.02	0.03	0.02	0.02	0.92	0.96	0.94	0.94	0.96	0.97	0.03	0.95	0.04	0.54	0.94	0.07	0.47
cg03634997	GAS8	Pure Island	Within	0.1	0.05	0.03	0.19	0.06	0.06	0.06	0.06	0.04	0.13	0.04	0.05	0.64	0.03	0.06	0.04	0.09	0.04	0.07	0.07	0.05	0.08	0.02	0.04	0.02	0.03	0.04	0.03	0.02	0.02	0.02	0.02	0.89	0.02	0.03	0.05	0.05	0.03	0.05	0.05	0.03	0.06	0.02	0.07	0.08	0.05
cg03657766	DLX2	Pure Island	Within	0.06	0.08	0.03	NA	0.07	0.09	0.06	0.09	0.08	0.19	0.03	0.98	0.03	0.04	0.12	0.21	0.07	0.06	0.06	0.11	0.94	0.98	0.04	0.03	0.07	0.05	0.04	0.06	0.02	0.03	0.02	0.03	NA	0.04	0.05	0.67	0.17	0.05	0.89	0.02	0.04	0.06	0.05	0.35	0.85	0.03
cg03663215	ADCY2	Pure Island	Within	0.07	0.07	0.05	0.04	0.05	0.05	0.05	0.05	0.05	0.02	0.05	0.04	0.91	0.47	0.11	0.27	0.22	0.06	0.44	0.14	0.88	0.92	0.2	0.03	0.07	0.74	0.04	0.16	0.03	0.06	0.06	0.26	0.12	0.18	0.89	0.27	0.78	0.81	0.92	0.49	0.56	0.06	0.18	0.8	0.4	0.19
cg03664800	LOXL2	Pure Island	Within	0.05	0.05	0.03	0.04	0.1	0.09	0.08	0.08	0.1	0.09	0.05	0.04	0.14	0.03	0.06	0.04	0.05	0.79	0.04	0.06	0.9	NA	0.01	0.01	0.01	0.03	0.03	0.01	0.01	0.02	0.02	0.02	0.25	0.02	0.97	0.26	0.83	0.91	0.95	0.11	0.03	0.06	0.27	0.07	0.08	0.04
cg03673687	EML1	Pure Island	Within	0.06	0.05	0.03	0.03	0.04	0.03	0.03	0.04	0.03	0.01	0.02	0.04	0.04	0.03	0.06	0.04	0.06	0.04	0.28	0.06	0.84	0.89	0.12	0.03	0.02	0.03	0.02	0.02	0.03	0.02	0.03	0.03	0.07	0.03	0.94	0.07	0.82	0.02	0.23	0.03	0.03	0.03	0.02	0.06	0.04	0.04
cg03698393	HAPLN3	Pure Island	Within	0.05	0.04	0.04	0.18	0.03	0.03	0.04	0.04	0.03	0.04	0.03	0.03	0.06	0.12	0.11	0.87	0.07	0.44	0.31	0.13	0.29	0.35	0.18	0.02	0.03	0.93	0.02	0.02	0.4	0.33	0.11	0.22	0.88	0.38	0.29	0.21	0.07	0.94	0.88	0.07	0.92	0.03	0.02	0.07	0.08	0.03
cg03700462	HOXA1	Pure Island	Within	0.02	0.02	0.01	0.01	0.04	0.04	0.05	0.05	0.05	0.02	0.03	0.03	0.02	0.04	0.02	0.07	0.04	0.65	0.04	0.02	0.02	0.02	0.13	0.44	0.02	0.03	0.67	0.16	0.01	0.95	0.32	0.92	0.29	0.02	0.01	0.02	0.4	0.03	0.01	0.95	0.5	0.02	0.35	0.07	0.68	0.23
cg03705396	MAP6D1	Pure Island	Within	0.19	0.08	0.08	0.07	0.03	0.03	0.02	0.03	0.03	0.02	0.09	0.19	0.49	0.2	0.53	0.12	0.15	0.1	0.15	0.13	0.32	0.09	0.24	0.06	0.09	0.41	0.1	0.2	0.13	0.11	0.08	0.2	0.03	0.15	0.07	0.34	0.07	0.59	0.33	0.39	0.07	0.11	0.22	0.25	0.15	0.38
cg03712038	ZNF160	Pure Island	Within	0.04	0.05	0.06	0.03	0.02	0.03	0.02	0.02	0.02	0.01	0.05	0.04	0.03	0.06	0.32	0.05	0.04	0.03	0.04	0.06	0.89	0.05	0.02	0.01	0.44	0.02	0.03	0.33	0.17	0.02	0.15	0.03	0.12	0.02	0.03	0.1	0.04	0.08	0.12	0.36	0.03	0.06	0.06	0.08	0.03	0.02
cg03713346	CPNE2	Pure Island	Within	0.09	0.06	0.05	0.02	0.03	0.03	0.02	0.02	0.02	0.01	0.02	0.04	0.04	0.03	0.05	0.05	0.08	0.05	0.09	0.07	0.06	0.06	0.02	0.02	0.02	0.02	0.02	0.02	0.02	0.02	0.02	0.02	0.02	0.02	0.02	0.02	0.04	0.02	0.03	0.02	0.03	0.03	0.02	0.06	0.06	0.03
cg03729431	ADORA2B	Pure Island	Within	0.06	0.08	0.04	0.03	0.04	0.03	0.03	0.03	0.03	0.02	0.03	0.06	0.04	0.04	0.86	0.06	0.07	0.07	0.14	0.09	0.11	0.07	0.22	0.02	0.02	0.02	0.03	0.02	0.02	0.02	0.02	0.02	0.02	0.03	0.03	0.04	0.09	0.06	0.09	0.03	0.03	0.03	0.04	0.05	0.13	0.03
cg03734660	CRABP2	Pure Island	Within	0.11	0.09	0.05	0.07	0.02	0.02	0.02	0.02	0.02	0.02	0.03	0.11	0.05	0.03	0.13	0.05	0.08	0.06	0.09	0.12	0.14	0.1	0.01	0.01	0.17	0.02	0.01	0.02	0.02	0.01	0.01	0.02	0.02	0.03	0.02	0.11	0.07	0.03	0.03	0.03	0.94	0.03	0.02	0.08	0.03	0.02
cg03742003	SLIT2	Pure Island	Within	0.09	0.12	0.08	0.05	0.05	0.05	0.05	0.07	0.06	0.06	0.13	0.78	0.84	0.32	0.32	0.73	0.25	0.1	0.5	0.45	0.62	0.61	0.1	0.04	0.14	0.84	0.29	0.35	0.21	0.15	0.22	0.3	0.03	0.83	0.19	0.36	0.31	0.61	0.37	0.86	0.56	0.35	0.72	0.59	0.28	0.31
cg03751414	AP1S1	Pure Island	Within	0.08	0.07	0.06	0.14	0.12	0.13	0.09	0.08	0.09	0.16	0.05	0.04	0.62	0.04	0.08	0.05	0.07	0.06	0.05	0.06	0.07	0.05	0.02	0.02	0.02	0.03	0.03	0.02	0.02	0.02	0.02	0.02	0.1	0.04	0.03	0.04	0.05	0.02	0.04	0.04	0.03	0.07	0.04	0.08	0.07	0.04
cg03755123	UTF1	Pure Island	Within	0.22	0.17	0.17	0.02	0.13	0.08	0.08	0.09	0.13	0.04	0.23	0.9	0.96	0.5	0.38	0.93	0.91	0.9	0.93	0.91	0.95	0.97	0.49	0.31	0.7	0.96	0.05	0.56	0.64	0.35	0.3	0.77	0.76	0.73	0.96	0.78	0.93	0.94	0.96	0.93	0.95	0.25	0.91	0.91	0.86	0.89
cg03776464	EPHA4	Pure Island	Within	0.09	0.06	0.05	0.07	0.04	0.04	0.04	0.05	0.03	0.04	0.05	0.62	0.93	0.05	0.07	0.07	0.06	0.06	0.1	0.08	0.08	0.81	0.13	0.03	0.04	0.03	0.03	0.04	0.03	0.04	0.04	0.07	0.03	0.03	0.03	0.05	0.11	0.04	0.28	0.04	0.05	0.05	0.04	0.07	0.05	0.92
cg03776551	ZNF396	Pure Island	Within	0.08	0.09	0.06	0.07	0.04	0.03	0.03	0.04	0.03	0.04	0.03	0.07	0.05	0.07	0.19	0.1	0.08	0.05	0.11	0.11	0.63	0.91	0.04	0.04	0.03	0.05	0.05	0.04	0.04	0.05	0.03	0.38	0.03	0.08	0.05	0.1	0.1	0.09	0.11	0.05	0.37	0.05	0.05	0.5	0.04	0.05
cg03777459	GATA5	Pure Island	Within	0.15	0.11	0.14	0.09	0.08	0.07	0.09	0.09	0.07	0.1	0.06	0.47	0.94	0.33	0.48	0.88	0.14	0.07	0.82	0.83	0.92	0.93	0.34	0.29	0.57	0.94	0.56	0.9	0.57	0.37	0.15	0.37	0.25	0.04	0.58	0.97	0.91	0.97	0.93	0.33	0.96	0.05	0.88	0.81	0.82	0.52
cg03799530	SH2B3	Pure Island	Within	0.12	0.15	0.06	0.11	0.05	0.08	0.08	0.09	0.17	0.06	0.07	0.08	0.04	0.29	0.19	0.12	0.87	0.08	0.16	0.12	0.24	0.11	0.02	0.03	0.03	0.1	0.06	0.03	0.03	0.03	0.04	0.03	0.06	0.03	0.05	0.06	0.04	0.04	0.08	0.04	0.06	0.08	0.04	0.09	0.07	0.06
cg03804985	SLC2A8	Pure Island	Within	0.1	0.12	0.09	0.12	0.1	0.12	0.11	0.11	0.12	0.08	0.06	0.14	0.89	0.08	0.5	0.08	0.1	0.09	0.1	0.15	0.1	0.34	0.04	0.05	0.03	0.04	0.07	0.04	0.05	0.04	0.05	0.04	0.17	0.03	0.05	0.07	0.07	0.06	0.07	0.09	0.75	0.13	0.11	0.11	0.13	0.07
cg03807235	PEX7	Pure Island	Within	0.1	0.08	0.05	0.01	0.03	0.04	0.03	0.04	0.04	0.06	0.06	0.04	0.7	0.06	0.45	0.05	0.05	0.04	0.45	0.08	0.19	0.84	0.04	0.41	0.03	0.03	0.03	0.06	0.02	0.03	0.03	0.34	0.15	0.03	0.03	0.21	0.07	0.03	0.07	0.14	0.11	0.07	0.03	0.32	0.07	0.03
cg03813215	BCL2	Pure Island	Within	0.14	0.12	0.07	0.04	0.07	0.06	0.05	0.07	0.07	0.07	0.06	0.07	0.07	0.07	0.12	0.1	0.12	0.09	0.13	0.15	0.09	0.14	0.06	0.06	0.06	0.06	0.07	0.09	0.05	0.05	0.06	0.06	0.05	0.06	0.37	0.07	0.42	0.07	0.08	0.32	0.06	0.11	0.08	0.43	0.09	0.06
cg03820909	C10orf137	Pure Island	Within	0.01	0.02	0.01	0.02	0.02	0.02	0.02	0.02	0.01	0.02	0.02	0.01	0.01	0.01	0.01	0.02	0.03	0.01	0.02	0.02	0.01	0.29	0.01	0.01	0.01	0.01	0.01	0.01	0.01	0.01	0.01	0.01	0.01	0.01	0.01	0.01	0.02	0.01	0.01	0.01	0.01	0.01	0.01	0.01	0.02	0.02
cg03835332	SERF2	Pure Island	Within	0.18	0.21	0.09	0.04	0.05	0.05	0.05	0.06	0.05	0.04	0.04	0.64	0.07	0.07	0.56	0.09	0.16	0.12	0.17	0.21	0.21	0.23	0.05	0.05	0.05	0.05	0.04	0.05	0.05	0.06	0.05	0.05	0.04	0.13	0.04	0.06	0.07	0.89	0.04	0.06	0.05	0.06	0.06	0.09	0.09	0.05
cg03856450	SFXN5	Pure Island	Within	0.05	0.05	0.04	0.06	0.05	0.05	0.05	0.06	0.04	0.02	0.02	0.03	0.03	0.03	0.06	0.03	0.05	0.05	0.06	0.04	0.6	0.49	0.02	0.02	0.02	0.02	0.03	0.02	0.02	0.02	0.02	0.01	0.03	0.01	0.02	0.03	0.03	0.02	0.02	0.03	0.03	0.03	0.02	0.04	0.05	0.03
cg03860890	EGFR	Pure Island	Within	0.08	0.06	0.05	0.16	0.04	0.05	0.04	0.04	0.04	0.04	0.04	0.55	0.9	0.24	0.54	0.68	0.74	0.45	0.43	0.6	0.35	0.84	0.54	0.48	0.08	0.66	0.11	0.42	0.25	0.41	0.42	0.9	0.89	0.35	0.68	0.94	0.57	0.53	0.92	0.51	0.56	0.05	0.05	0.78	0.18	0.3
cg03876618	IGFBP7	Pure Island	Within	0.17	0.06	0.05	0.02	0.23	0.16	0.16	0.22	0.17	0.03	0.05	0.03	0.04	0.5	0.06	0.72	0.58	0.61	0.06	0.66	0.96	0.97	0.42	0.03	0.09	0.87	0.31	0.31	0.03	0.5	0.22	0.84	0.79	0.11	0.76	0.61	0.89	0.1	0.87	0.94	0.97	0.08	0.56	0.88	0.08	0.04
cg03884783	ZNF569	Pure Island	Within	0.08	0.12	0.05	0.02	0.04	0.05	0.06	0.03	0.04	0.07	0.06	0.05	0.05	0.38	0.23	0.08	0.07	0.06	0.08	0.09	0.87	0.91	0.02	0.02	0.23	0.06	0.04	0.07	0.02	0.04	0.2	0.03	0.03	0.02	0.96	0.15	0.89	0.93	0.96	0.26	0.03	0.04	0.03	0.73	0.05	0.04
cg03897136	HOOK1	Pure Island	Within	0.09	0.1	0.06	0.24	0.04	0.04	0.03	0.03	0.03	0.03	0.08	0.24	0.96	0.06	0.14	0.07	0.07	0.07	0.06	0.12	0.08	0.71	0.02	0.01	0.02	0.02	0.03	0.01	0.02	0.01	0.02	0.13	0.07	0.02	0.04	0.06	0.04	0.06	0.03	0.04	0.81	0.04	0.02	0.05	0.08	0.06
cg03909500	RXFP3	Pure Island	Within	0.09	0.19	0.12	0.06	0.03	0.05	0.03	0.06	0.03	0.04	0.09	0.17	0.5	0.68	0.56	0.77	0.46	0.09	0.74	0.83	0.2	0.67	0.23	0.23	0.52	0.76	0.44	0.35	0.06	0.76	0.31	0.77	0.03	0.19	0.34	0.16	0.35	0.72	0.83	0.7	0.89	0.35	0.29	0.56	0.71	0.29
cg03920233	DOC2A	Pure Island	Within	0.09	0.11	0.04	0.05	0.03	0.03	0.02	0.03	0.04	0.04	0.12	0.09	0.08	0.2	0.23	0.06	0.1	0.07	0.24	0.24	0.88	0.12	0.03	0.02	0.04	0.04	0.98	0.08	0.03	0.03	0.02	0.93	0.04	0.35	0.03	0.05	0.24	0.41	0.27	0.4	0.05	0.1	0.35	0.87	0.09	0.05
cg03939688	KLF4	Pure Island	Within	0.1	0.08	0.06	0.03	0.04	0.05	0.04	0.03	0.04	0.08	0.03	0.96	0.96	0.04	0.25	0.06	0.1	0.06	0.14	0.07	0.11	0.43	0.02	0.03	0.02	0.03	0.06	0.02	0.03	0.02	0.03	0.02	0.03	0.03	0.03	0.04	0.05	0.04	0.05	0.03	0.13	0.04	0.03	0.1	0.07	0.04
cg03940103	CYP2S1	Pure Island	Within	0.11	0.11	0.09	0.06	0.13	0.09	0.1	0.08	0.05	0.04	0.08	0.17	0.48	0.19	0.2	0.09	0.1	0.08	0.1	0.13	0.11	0.86	0.47	0.05	0.05	0.05	0.06	0.23	0.05	0.05	0.05	0.07	0.03	0.05	0.07	0.07	0.08	0.08	0.05	0.07	0.74	0.07	0.05	0.22	0.11	0.06
cg03940966	THEM4	Pure Island	Within	0.05	0.05	0.07	0.03	0.03	0.03	0.03	0.03	0.03	0.01	0.06	0.08	0.91	0.09	0.06	0.08	0.04	0.03	0.08	0.04	0.06	0.11	0.03	0.03	0.03	0.03	0.04	0.03	0.03	0.02	0.04	0.03	0.79	0.12	0.07	0.12	0.07	0.12	0.06	0.1	0.05	0.07	0.07	0.1	0.06	0.03
cg03958979	NR2E1	Pure Island	Within	0.11	0.19	0.12	0.1	0.15	0.17	0.17	0.16	0.11	0.13	0.19	0.96	0.98	0.74	0.85	0.94	0.63	0.94	0.94	0.92	0.95	0.93	0.28	0.52	0.95	0.97	0.98	0.83	0.64	0.98	0.97	0.97	0.73	0.98	0.97	0.98	0.93	0.97	0.96	0.97	0.97	0.15	0.96	0.92	0.96	0.96
cg03963198	IRX4	Pure Island	Within	0.07	0.17	0.17	0.03	0.05	0.14	0.03	0.05	0.03	0.02	0.06	0.95	0.97	0.04	0.56	0.07	0.58	0.05	0.9	0.88	0.92	0.92	0.54	0.73	0.22	0.03	0.03	0.56	0.03	0.06	0.06	0.51	0.11	0.12	0.98	0.97	0.97	0.97	0.96	0.96	0.97	0.64	0.97	0.09	0.94	0.95
cg03984733	HDHD3	Associated Island	Within	0.04	0.02	0.02	0.01	0.03	0.03	0.04	0.04	0.03	0.01	0.02	0.94	0.02	0.03	0.2	0.04	0.08	0.04	0.05	0.05	0.06	0.03	0.01	0.01	0.01	0.02	0.01	0.01	0.02	0.01	0.02	0.02	0.01	0.01	0.01	0.01	0.04	0.01	0.02	0.02	0.01	0.03	0.02	0.05	0.06	0.04
cg03985136	ULBP2	Pure Island	Within	0.1	0.12	0.07	0.1	0.06	0.04	0.04	0.04	0.06	0.07	0.06	0.41	0.5	0.84	0.14	0.11	0.18	0.09	0.76	0.18	0.42	0.9	0.03	0.04	0.05	0.07	0.04	0.24	0.04	0.06	0.04	0.52	0.06	0.06	0.2	0.09	0.12	0.07	0.19	0.37	0.27	0.05	0.08	0.39	0.09	0.06
cg03998173	RHEB	Pure Island	Within	0.11	0.13	0.05	0.08	0.04	0.05	0.04	0.04	0.05	0.1	0.05	0.76	0.22	0.04	0.11	0.31	0.08	0.07	0.19	0.3	0.4	0.61	0.03	0.9	0.87	0.23	0.18	0.15	0.19	0.32	0.03	0.91	0.11	0.86	0.16	0.04	0.07	0.04	0.22	0.08	0.92	0.07	0.04	0.56	0.05	0.76
cg04005725	KLHDC8B	Pure Island	Within	0.06	0.05	0.04	0.02	0.04	0.03	0.03	0.03	0.03	0.02	0.03	0.04	0.03	0.06	0.13	0.05	0.06	0.05	0.31	0.05	0.77	0.44	0.02	0.03	0.03	0.03	0.02	0.02	0.03	0.03	0.03	0.12	0.02	0.03	0.03	0.03	0.06	0.04	0.1	0.08	0.03	0.03	0.03	0.05	0.06	0.03
cg04008901	CACNA2D1	Pure Island	Within	0.04	0.05	0.08	0.05	0.04	0.04	0.05	0.05	0.04	0.02	0.08	0.05	0.05	0.18	0.05	0.09	0.36	0.07	0.55	0.13	0.82	0.84	0.04	0.03	0.04	0.04	0.02	0.03	0.03	0.04	0.04	0.03	0.02	0.04	0.84	0.54	0.84	0.42	0.89	0.13	0.39	0.06	0.42	0.74	0.06	0.06
cg04034767	GRASP	Pure Island	Within	0.09	0.09	0.08	0.1	0.09	0.11	0.11	0.11	0.1	0.09	0.1	0.85	0.06	0.72	0.42	0.96	0.9	0.94	0.86	0.95	0.93	0.94	0.28	0.02	0.97	0.96	0.03	0.28	0.05	0.52	0.06	0.97	0.17	0.97	0.97	0.98	0.92	0.97	0.96	0.97	0.95	0.1	0.96	0.89	0.92	0.93
cg04051458	THBS1	Pure Island	Within	0.09	0.12	0.04	0.04	0.04	0.05	0.05	0.05	0.05	0.03	0.04	0.04	0.06	0.03	0.1	0.07	0.16	0.06	0.09	0.11	0.67	0.74	0.03	0.04	0.03	0.04	0.04	0.03	0.03	0.03	0.03	0.03	0.03	0.05	0.04	0.03	0.06	0.04	0.04	0.03	0.58	0.04	0.03	0.07	0.06	0.04
cg04107037	ATOH1	Pure Island	Within	0.13	0.08	0.14	0.04	0.05	0.06	0.06	0.06	0.04	0.06	0.21	0.08	0.09	0.26	0.55	0.19	0.14	0.22	0.42	0.21	0.07	0.37	0.15	0.05	0.07	0.07	0.04	0.23	0.04	0.11	0.07	0.52	0.03	0.08	0.16	0.2	0.06	0.67	0.48	0.75	0.52	0.09	0.05	0.27	0.23	0.53
cg04118154	C1orf228	Pure Island	Within	0.11	0.11	0.06	0.01	0.03	0.03	0.03	0.03	0.03	0.01	0.03	0.05	0.04	0.03	0.31	0.07	0.1	0.08	0.11	0.13	0.11	0.09	0.02	0.02	0.02	0.03	0.02	0.02	0.02	0.01	0.02	0.02	0.02	0.02	0.03	0.03	0.05	0.03	0.02	0.03	0.04	0.03	0.03	0.06	0.04	0.03
cg04148458	FAIM	Pure Island	Within	0.04	0.03	0.02	0.01	0.03	0.03	0.03	0.03	0.03	0.02	0.05	0.02	0.39	0.03	0.56	0.03	0.03	0.03	0.03	0.02	0.02	0.02	0.41	0.01	0.01	0.02	0.01	0.01	0.01	0.01	0.02	0.02	0.01	0.44	0.02	0.02	0.05	0.02	0.01	0.02	0.02	0.02	0.01	0.05	0.04	0.03
cg04172348	SYN2	Pure Island	Within	0.1	0.11	0.05	0.1	0.06	0.05	0.04	0.06	0.06	0.07	0.07	0.06	0.89	0.64	0.36	0.79	0.67	0.1	0.79	0.27	0.67	0.69	0.06	0.04	0.09	0.89	0.66	0.1	0.04	0.63	0.05	0.88	0.35	0.04	0.9	0.91	0.86	0.82	0.91	0.38	0.35	0.06	0.06	0.15	0.86	0.05
cg04180868	PRTFDC1	Pure Island	Within	0.03	0.03	0.03	0.01	0.05	0.06	0.05	0.05	0.04	0.01	0.23	0.65	0.32	0.54	0.95	0.39	0.19	0.07	0.32	0.03	0.04	0.03	0.01	0.01	0.19	0.53	0.01	0.01	0.01	0.02	0.02	0.02	0.01	0.4	0.02	0.6	0.03	0.01	0.02	0.02	0.02	0.03	0.02	0.95	0.05	0.02
cg04244987	NCKIPSD	Pure Island	Within	0.2	0.23	0.13	0.07	0.07	0.05	0.06	0.05	0.05	0.09	0.04	0.55	0.09	0.33	0.4	0.13	0.21	0.17	0.21	0.24	0.9	0.27	0.04	0.03	0.09	0.13	0.1	0.08	0.05	0.31	0.04	0.27	0.05	0.05	0.08	0.07	0.09	0.06	0.84	0.08	0.06	0.07	0.38	0.57	0.17	0.06
cg04278702	HTR1E	Pure Island	Within	0.03	0.03	0.04	0.03	0.03	0.04	0.04	0.04	0.03	0.02	0.02	0.03	0.85	0.13	0.17	0.03	0.24	0.14	0.69	0.38	0.84	0.86	0.17	0.01	0.19	0.02	0.03	0.28	0.02	0.01	0.03	0.08	0.01	0.09	0.72	0.21	0.74	0.8	0.95	0.93	0.93	0.03	0.68	0.66	0.35	0.93
cg04280480	PPARA	Associated Island	Within	0.07	0.05	0.05	0.01	0.02	0.02	0.02	0.05	0.02	0.01	0.08	0.09	0.05	0.06	0.05	0.15	0.04	0.05	0.06	0.05	0.05	0.09	0.01	0.01	0.03	0.2	0.02	0.02	0.1	0.01	0.27	0.24	0.01	0.03	0.06	0.12	0.06	0.13	0.04	0.05	0.04	0.1	0.04	0.65	0.06	0.02
cg04304927	SLC39A8	Pure Island	Within	0.03	0.03	0.02	0.05	0.03	0.03	0.03	0.03	0.03	0.03	0.04	0.02	0.02	0.03	0.03	0.04	0.04	0.03	0.03	0.04	0.03	0.03	0.01	0.01	0.01	0.02	0.01	0.01	0.01	0.01	0.02	0.01	0.03	0.01	0.01	0.02	0.03	0.01	0.02	0.02	0.02	0.02	0.01	0.07	0.04	0.02
cg04317399	HOXA4	Pure Island	Within	0.09	0.1	0.15	0.07	0.09	0.11	0.1	0.1	0.17	0.04	0.18	0.22	0.97	0.1	0.13	0.09	0.1	0.58	0.14	0.06	0.06	0.09	0.19	0.97	0.49	0.06	0.96	0.32	0.96	0.97	0.44	0.96	0.87	0.05	0.42	0.11	0.39	0.09	0.06	0.96	0.97	0.92	0.94	0.12	0.81	0.08
cg04324308	COL4A3	Pure Island	Within	0.05	0.06	0.04	0.04	0.04	0.04	0.03	0.04	0.04	0.03	0.03	0.04	0.97	0.04	0.33	0.05	0.09	0.05	0.07	0.15	0.96	0.97	0.26	0.02	0.03	0.03	0.03	0.07	0.02	0.02	0.02	0.03	0.02	0.02	0.99	0.03	0.3	0.03	0.62	0.05	0.26	0.05	0.02	0.08	0.05	0.03
cg04386405	ZNF83	Pure Island	Within	0.08	0.1	0.05	0.09	0.03	0.03	0.04	0.04	0.03	0.03	0.1	0.56	0.34	0.11	0.3	0.17	0.06	0.05	0.37	0.33	0.66	0.47	0.03	0.07	0.36	0.12	0.14	0.31	0.54	0.1	0.31	0.15	0.44	0.04	0.81	0.05	0.48	0.15	0.44	0.17	0.31	0.03	0.26	0.31	0.04	0.38
cg04388983	P2RY2	Pure Island	Within	0.1	NA	0.08	NA	0.06	0.12	0.07	0.08	0.09	0.12	0.05	0.85	0.07	0.04	NA	0.05	0.1	0.05	0.38	NA	NA	NA	0.37	0.11	0.08	0.04	0.79	0.39	0.05	0.34	0.04	0.87	NA	0.19	0.11	0.08	0.07	0.04	0.11	0.15	0.9	0.14	0.05	0.23	0.09	0.34
cg04402875	RET	Pure Island	Within	0.06	0.07	0.04	0.03	0.05	0.04	0.04	0.03	0.03	0.02	0.03	0.12	0.04	0.44	0.09	0.05	0.1	0.04	0.59	0.43	0.92	0.94	0.2	0.02	0.03	0.03	0.03	0.03	0.03	0.03	0.04	0.06	0.02	0.03	0.1	0.54	0.63	0.53	0.92	0.96	0.5	0.04	0.9	0.11	0.86	0.22
cg04411625	CRIP1	Pure Island	Within	0.14	0.12	0.07	0.03	0.09	0.11	0.11	0.16	0.08	0.06	0.15	0.88	0.08	0.67	0.88	0.91	0.75	0.04	0.24	0.12	0.87	0.91	0.38	0.95	0.62	0.93	0.03	0.5	0.38	0.02	0.02	0.93	0.96	0.74	0.02	0.31	0.04	0.73	0.09	0.21	0.93	0.03	0.69	0.04	0.78	0.02
cg04418492	CYP7B1	Pure Island	Within	0.05	0.04	0.03	0.01	0.07	0.03	0.02	0.03	0.02	0.01	0.1	0.02	0.96	0.5	0.24	0.67	0.05	0.25	0.75	0.67	0.88	0.85	0.39	0.01	0.12	0.89	0.27	0.3	0.21	0.21	0.02	0.52	0.04	0.21	0.58	0.43	0.37	0.75	0.51	0.06	0.67	0.03	0.1	0.82	0.1	0.32
cg04434339	ST6GAL2	Pure Island	Within	0.1	0.08	0.06	0.03	0.03	0.02	0.02	0.03	0.02	0.02	0.09	0.42	0.95	0.04	0.11	0.77	0.13	0.61	0.89	0.68	0.9	0.92	0.32	0.02	0.03	0.46	0.02	0.24	0.02	0.03	0.03	0.4	0.02	0.02	0.94	0.04	0.9	0.82	0.96	0.82	0.93	0.46	0.62	0.88	0.72	0.44
cg04451988	FAM171A1	Pure Island	Within	0.09	0.06	0.05	0.03	0.03	0.03	0.03	0.03	0.03	0.03	0.03	0.04	0.05	0.02	0.07	0.38	0.09	0.04	0.08	0.09	0.07	0.05	0.04	0.02	0.02	0.03	0.03	0.02	0.02	0.02	0.03	0.03	0.02	0.03	0.03	0.03	0.05	0.02	0.03	0.04	0.04	0.05	0.03	0.13	0.06	0.02
cg04453065	CYR61	Pure Island	Within	0.05	0.06	0.03	0.06	0.03	0.03	0.03	0.03	0.04	0.07	0.02	0.04	0.03	0.03	0.05	0.05	0.07	0.04	0.1	0.08	0.06	0.05	0.02	0.04	0.02	0.02	0.03	0.02	0.02	0.03	0.02	0.03	0.04	0.03	0.03	0.02	0.05	0.03	0.03	0.04	0.03	0.03	0.02	0.06	0.07	0.02
cg04454259	CBR3	Pure Island	Within	0.06	0.05	0.04	0.03	0.04	0.04	0.04	0.05	0.03	0.02	0.08	0.08	0.12	0.07	0.12	0.09	0.06	0.05	0.08	0.21	0.05	0.06	0.05	0.05	0.04	0.04	0.03	0.04	0.04	0.03	0.04	0.06	0.03	0.36	0.06	0.04	0.1	0.12	0.06	0.06	0.04	0.05	0.04	0.08	0.07	0.04
cg04460372	ST6GALNAC6	No/Distant Island	Within	0.16	0.12	0.05	0.05	0.04	0.05	0.05	0.04	0.04	0.05	0.04	0.1	0.25	0.07	0.26	0.14	0.13	0.09	0.42	0.17	0.11	0.08	0.04	0.38	0.09	0.2	0.03	0.03	0.39	0.05	0.12	0.04	0.5	0.22	0.07	0.1	0.09	0.62	0.04	0.26	0.04	0.06	0.23	0.09	0.07	0.04
cg04480914	PPP2R5B	Pure Island	Within	0.05	0.04	0.03	0.01	0.03	0.02	0.02	0.02	0.02	0.02	0.02	0.03	0.02	0.02	0.04	0.04	0.05	0.03	0.04	0.04	0.04	0.03	0.01	0.01	0.02	0.02	0.02	0.01	0.02	0.01	0.02	0.02	0.01	0.02	0.02	0.01	0.04	0.02	0.01	0.03	0.02	0.02	0.02	0.06	0.03	0.02
cg04490714	SLC6A2	Pure Island	Within	0.05	0.04	0.06	0.05	0.03	0.04	0.03	0.04	0.02	0.03	0.07	0.34	0.96	0.83	0.4	0.95	0.46	0.5	0.91	0.9	0.95	0.94	0.48	0.94	0.54	0.97	0.97	0.86	0.62	0.51	0.24	0.98	0.56	0.96	0.98	0.75	0.95	0.97	0.98	0.98	0.97	0.89	0.7	0.95	0.85	0.63
cg04504095	FOXC1	Pure Island	Within	0.05	0.06	0.03	0.01	0.02	0.02	0.02	0.02	0.02	0.01	0.02	0.11	0.56	0.02	0.05	0.06	0.06	0.12	0.06	0.08	0.48	0.95	0.02	0.03	0.03	0.05	0.05	0.02	0.01	0.03	0.02	0.03	0.02	0.01	0.03	0.07	0.05	0.04	0.03	0.08	0.07	0.03	0.06	0.06	0.09	0.02
cg04508286	2011-09-07	Pure Island	Within	0.07	0.07	0.04	0.08	0.04	0.03	0.03	0.04	0.03	0.04	0.06	0.05	0.04	0.08	0.1	0.09	0.15	0.06	0.1	0.15	0.08	0.14	0.02	0.03	0.03	0.03	0.03	0.02	0.02	0.03	0.03	0.03	0.06	0.05	0.03	0.04	0.08	0.11	0.06	0.04	0.04	0.06	0.06	0.04	0.04	0.03
cg04513669	SH3GLB1	Pure Island	Within	0.21	0.19	0.11	0.06	0.04	0.06	0.05	0.05	0.05	0.07	0.06	0.12	0.08	0.22	0.37	0.12	0.17	0.15	0.18	0.24	0.78	0.2	0.05	0.03	0.05	0.2	0.04	0.41	0.04	0.06	0.04	0.81	0.07	0.33	0.09	0.09	0.14	0.06	0.39	0.9	0.46	0.04	0.06	0.77	0.08	0.06
cg04515001	DCDC2	Pure Island	Within	0.23	0.17	0.18	0.17	0.1	0.13	0.11	0.14	0.11	0.21	0.15	0.92	0.92	0.36	0.88	0.23	0.48	0.54	0.09	0.11	0.82	0.9	0.48	0.05	0.04	0.05	0.41	0.23	0.04	0.27	0.04	0.83	0.98	0.11	0.93	0.35	0.85	0.05	0.37	0.14	0.72	0.06	0.04	0.87	0.29	0.09
cg04532952	CA4	Pure Island	Within	0.07	0.07	0.06	0.08	0.1	0.09	0.14	0.1	0.11	0.21	0.05	0.94	0.67	0.82	0.5	0.95	0.66	0.18	0.89	NA	0.77	NA	0.25	0.17	0.16	0.97	0.89	0.29	0.02	0.87	0.18	0.93	0.06	0.07	0.94	0.9	0.87	0.92	0.92	0.95	0.95	0.73	0.94	0.82	0.9	0.29
cg04548378	CDKN1C	Pure Island	Within	0.24	0.21	0.16	0.09	0.15	0.11	0.09	0.12	0.11	0.1	0.07	0.13	0.36	0.11	0.24	0.22	0.16	0.17	0.14	0.15	0.21	0.14	0.06	0.05	0.06	0.19	0.13	0.06	0.07	0.07	0.06	0.05	0.11	0.06	0.07	0.05	0.11	0.12	0.05	0.09	0.07	0.07	0.09	0.09	0.14	0.09
cg04555836	MYO6	Pure Island	Within	0.07	0.06	0.05	0.05	0.1	0.12	0.12	0.12	0.12	0.05	0.07	0.05	0.05	0.07	0.07	0.08	0.1	0.07	0.12	0.06	0.06	0.28	0.04	0.04	0.04	0.07	0.04	0.05	0.04	0.04	0.07	0.04	0.02	0.05	0.04	0.04	0.1	0.03	0.04	0.06	0.05	0.05	0.05	0.14	0.13	0.11
cg04590978	CCNJ	Pure Island	Within	0.14	0.1	0.06	0.17	0.06	0.06	0.06	0.07	0.09	0.14	0.08	0.08	0.04	0.25	0.1	0.16	0.27	0.19	0.37	NA	NA	NA	0.11	0.06	0.08	0.09	0.12	0.65	0.09	0.24	0.05	0.11	0.29	0.07	0.06	0.27	0.35	0.06	0.85	0.87	0.66	0.09	0.26	0.75	0.1	0.06
cg04598121	PENK	Pure Island	Within	0.08	0.07	0.07	0.15	0.04	0.08	0.08	0.1	0.07	0.03	0.08	0.58	0.85	0.61	0.68	0.8	0.77	0.47	0.69	0.73	0.85	0.86	0.78	0.03	0.46	0.76	0.61	0.8	0.5	0.85	0.59	0.83	0.89	0.81	0.88	0.89	0.75	0.88	0.9	0.84	0.86	0.84	0.79	0.56	0.55	0.8
cg04603031	CHRNA3	Pure Island	Within	0.07	0.06	0.08	0.03	0.04	0.06	0.04	0.05	0.04	0.03	0.1	0.53	0.24	0.14	0.29	0.18	0.1	0.07	0.2	0.2	0.94	0.95	0.4	0.03	0.07	0.46	0.02	0.36	0.02	0.05	0.08	0.9	0.05	0.5	0.93	0.89	0.94	0.97	0.96	0.95	0.18	0.08	0.94	0.92	0.93	0.44
cg04618607	SQLE	Pure Island	Within	0.06	0.06	0.05	0.06	0.03	0.04	0.03	0.04	0.04	0.04	0.06	0.04	0.04	0.06	0.08	0.07	0.07	0.04	0.09	0.07	0.06	0.08	0.03	0.03	0.04	0.03	0.05	0.03	0.03	0.02	0.03	0.03	0.04	0.04	0.05	0.07	0.08	0.07	0.05	0.06	0.06	0.04	0.03	0.08	0.12	0.03
cg04623955	hsa-mir-1247	Pure Island	Within	0.16	0.13	0.14	0.11	0.15	0.09	0.13	0.24	0.23	0.03	0.24	0.85	0.91	0.53	0.51	0.87	0.76	0.82	0.48	0.17	0.93	0.88	0.57	0.23	0.93	0.9	0.92	0.7	0.15	0.87	0.28	0.79	0.42	0.16	0.91	0.41	0.17	0.88	0.91	0.42	0.87	0.18	0.47	0.83	0.71	0.81
cg04628008	ZBTB16	Pure Island	Within	0.12	0.12	0.06	0.12	0.06	0.06	0.05	0.05	0.04	0.09	0.04	0.04	0.07	0.03	0.2	0.09	0.67	0.06	0.18	0.31	0.73	0.7	0.22	0.02	0.03	0.06	0.05	0.05	0.02	0.03	0.31	0.23	0.23	0.03	0.92	0.05	0.56	0.02	0.19	0.95	0.71	0.03	0.74	0.75	0.07	0.13
cg04632671	PPARG	Associated Island	Within	0.07	0.08	0.05	0.07	0.04	0.05	0.04	0.05	0.07	0.07	0.06	0.07	0.96	0.03	0.81	0.6	0.09	0.2	0.09	0.08	0.07	0.87	0.04	0.22	0.03	0.96	0.05	0.03	0.02	0.03	0.03	0.03	0.17	0.05	0.03	0.03	0.07	0.04	0.04	0.05	0.32	0.05	0.02	0.08	0.06	0.03
cg04633384	C18orf1	Pure Island	Within	0.08	0.06	0.04	0.03	0.07	0.06	0.08	0.06	0.06	0.03	0.05	0.44	0.05	0.4	0.09	0.06	0.18	0.06	0.22	0.46	0.41	0.83	0.13	0.02	0.05	0.18	0.05	0.09	0.03	0.03	0.09	0.36	0.2	0.05	0.04	0.34	0.12	0.79	0.77	0.09	0.34	0.05	0.04	0.77	0.57	0.12
cg04683240	HLX	Pure Island	Within	0.08	0.06	0.03	0.04	0.07	0.08	0.07	0.07	0.05	0.06	0.04	0.95	0.04	0.04	0.12	0.45	0.09	0.05	0.37	0.17	0.9	0.87	0.02	0.01	0.02	0.33	0.06	0.03	0.02	0.02	0.03	0.02	0.06	0.04	0.96	0.05	0.63	0.41	0.9	0.17	0.02	0.04	0.02	0.04	0.44	0.04
cg04684516	SNCAIP	Pure Island	Within	0.08	0.05	0.04	0.02	0.08	0.03	0.03	0.03	0.03	0.02	0.02	0.87	0.03	0.03	0.08	0.67	0.05	0.78	0.34	0.15	0.92	0.94	0.33	0.01	0.02	0.96	0.02	0.02	0.02	0.02	0.02	0.02	0.02	0.02	0.98	0.03	0.08	0.02	0.02	0.97	0.51	0.04	0.72	0.46	0.04	0.39
cg04686412	PSD2	Pure Island	Within	0.08	0.12	0.09	0.06	0.11	0.11	0.11	0.09	0.08	0.04	0.04	0.11	0.29	0.08	0.14	0.09	0.18	0.06	0.17	0.85	0.88	0.91	0.39	0.05	0.04	0.07	0.05	0.14	0.05	0.05	0.06	0.05	0.06	0.06	0.83	0.03	0.59	0.31	0.87	0.35	0.26	0.07	0.04	0.2	0.23	0.37
cg04688368	KCNMA1	Pure Island	Within	0.12	0.13	0.09	0.11	0.07	0.09	0.09	0.08	0.07	0.08	0.07	0.51	0.84	0.09	0.11	0.17	0.17	0.1	0.2	0.29	0.76	0.76	0.08	0.05	0.06	0.21	0.1	0.12	0.05	0.08	0.2	0.24	0.07	0.08	0.53	0.91	0.83	0.11	0.85	0.8	0.48	0.07	0.8	0.65	0.76	0.23
cg04700925	KIAA0922	Pure Island	Within	0.06	0.06	0.04	0.21	0.03	0.03	0.03	0.04	0.03	0.02	0.04	0.05	0.04	0.04	0.12	0.04	0.11	0.05	0.08	0.06	0.14	0.05	0.04	0.03	0.04	0.04	0.03	0.03	0.06	0.03	0.03	0.07	0.04	0.05	0.04	0.22	0.06	0.03	0.07	0.18	0.04	0.03	0.04	0.07	0.08	0.03
cg04711050	SLC1A1	Pure Island	Within	0.06	0.07	0.04	0.01	0.03	0.02	0.02	0.03	0.02	0.01	0.02	0.03	0.04	0.06	0.09	0.27	0.07	0.05	0.18	0.11	0.37	0.06	0.08	0.01	0.03	0.23	0.04	0.04	0.02	0.4	0.02	0.38	0.01	0.02	0.02	0.01	0.06	0.02	0.02	0.04	0.49	0.03	0.02	0.33	0.05	0.02
cg04718414	CDC16	Pure Island	Within	0.08	0.08	0.05	0.02	0.03	0.03	0.02	0.03	0.03	0.02	0.03	0.05	0.25	0.03	0.09	0.07	0.06	0.04	0.11	0.1	0.08	0.07	0.02	0.02	0.02	0.03	0.03	0.07	0.07	0.03	0.1	0.03	0.04	0.03	0.04	0.04	0.13	0.03	0.03	0.33	0.04	0.04	0.02	0.05	0.08	0.03
cg04726446	C2orf39	Pure Island	Within	0.08	0.07	0.07	0.03	0.05	0.04	0.03	0.09	0.05	0.04	0.07	0.84	0.9	0.87	0.81	0.15	0.25	0.85	0.09	0.1	0.81	0.92	0.54	0.03	0.48	0.46	0.83	0.22	0.27	0.05	0.03	0.05	0.03	0.84	0.87	0.59	0.84	0.89	0.39	0.45	0.07	0.23	0.19	0.77	0.81	0.83
cg04735745	ZBED3	Pure Island	Within	0.03	0.04	0.04	0.03	0.04	0.05	0.05	0.05	0.04	0.02	0.03	0.04	0.02	0.03	0.05	0.03	0.06	0.04	0.06	0.03	0.06	0.03	0.02	0.01	0.01	0.02	0.01	0.01	0.02	0.01	0.02	0.01	0.03	0.02	0.02	0.01	0.03	0.01	0.02	0.02	0.02	0.03	0.02	0.04	0.05	0.02
cg04741133	C5orf39	Pure Island	Within	0.06	0.05	0.03	0.14	0.06	0.06	0.06	0.05	0.05	0.11	0.04	0.77	0.02	0.04	0.4	0.04	0.04	0.06	0.1	0.05	0.05	0.05	0.02	0.02	0.01	0.03	0.02	0.02	0.02	0.04	0.03	0.04	0.14	0.04	0.02	0.05	0.04	0.03	0.03	0.03	0.02	0.03	0.03	0.05	0.09	0.03
cg04755031	PNPLA5	Pure Island	Within	0.04	0.06	0.07	0.25	0.1	0.09	0.1	0.12	0.1	0.11	0.05	0.28	0.4	0.07	0.04	0.66	0.27	0.11	0.32	0.36	0.42	0.27	0.16	0.02	0.07	0.84	0.07	0.12	0.02	0.06	0.04	0.04	0.86	0.03	0.03	0.04	0.13	0.48	0.07	0.05	0.25	0.05	0.05	0.11	0.13	0.23
cg04757428	STMN3	Pure Island	Within	0.06	0.07	0.04	0.03	0.04	0.04	0.05	0.04	0.03	0.02	0.04	0.03	0.03	0.03	0.07	0.04	0.16	0.04	0.07	0.06	0.06	0.53	0.02	0.02	0.02	0.02	0.02	0.02	0.02	0.02	0.03	0.02	0.02	0.03	0.06	0.02	0.22	0.03	0.67	0.08	0.02	0.02	0.03	0.07	0.3	0.05
cg04762346	S1PR2	Pure Island	Within	0.03	0.02	0.03	0.04	0.05	0.04	0.03	0.03	0.03	0.03	0.02	0.03	0.02	0.02	0.04	0.03	0.03	0.03	0.04	0.03	0.02	0.02	0.01	0.01	0.02	0.02	0.03	0.01	0.01	0.01	0.02	0.01	0.06	0.02	0.02	0.04	0.08	0.02	0.02	0.02	0.02	0.04	0.02	0.13	0.06	0.02
cg04763192	C1orf88	Pure Island	Within	0.03	0.03	0.03	0.07	0.03	0.03	0.02	0.02	0.02	0.03	0.02	0.05	0.04	0.04	0.13	0.05	0.34	0.03	0.08	0.05	0.94	0.94	0.05	0.01	0.02	0.06	0.21	0.02	0.02	0.03	0.02	0.04	0.03	0.08	0.32	0.49	0.05	0.04	0.54	0.03	0.75	0.05	0.02	0.08	0.14	0.03
cg04764624	RAB11FIP4	Pure Island	Within	0.09	0.09	0.09	0.04	0.09	0.13	0.15	0.19	0.1	0.04	0.1	0.92	0.82	0.55	0.86	0.87	0.74	0.86	0.82	0.9	0.92	0.91	0.71	0.53	0.94	0.9	0.78	0.56	0.93	0.89	0.33	0.89	0.95	0.74	0.93	0.86	0.89	0.95	0.92	0.94	0.93	0.88	0.91	0.9	0.86	0.55
cg04765929	TNFAIP8L1	Pure Island	Within	0.13	0.14	0.04	0.03	0.04	0.04	0.02	0.03	0.03	0.02	0.03	0.05	0.05	0.03	0.12	0.12	0.09	0.07	0.13	0.12	0.08	0.13	0.02	0.03	0.03	0.03	0.03	0.02	0.03	0.02	0.05	0.03	0.02	0.03	0.04	0.03	0.06	0.03	0.04	0.03	0.03	0.04	0.03	0.12	0.06	0.04
cg04770504	DFNA5	Pure Island	Within	0.06	0.08	0.06	0.04	0.03	0.02	0.02	0.03	0.03	0.02	0.03	0.04	0.07	0.12	0.07	0.91	0.13	0.49	0.91	0.45	0.92	0.92	0.1	0.03	0.02	0.96	0.03	0.02	0.07	0.03	0.04	0.04	0.18	0.16	0.96	0.96	0.89	0.03	0.96	0.42	0.04	0.04	0.63	0.56	0.08	0.03
cg04786857	SPDYA	Pure Island	Within	0.1	0.1	0.05	0.03	0.04	0.06	0.04	0.05	0.03	0.03	0.06	0.96	0.96	0.94	0.89	0.89	0.35	0.91	0.9	0.84	0.88	0.88	0.03	0.95	0.97	0.96	0.02	0.97	0.24	0.98	0.48	0.98	0.98	0.96	0.98	0.98	0.94	0.4	0.97	0.98	0.98	0.94	0.95	0.89	0.94	0.26
cg04798095	LAMA5	Pure Island	Within	0.12	0.12	0.07	0.02	0.02	0.02	0.03	0.03	0.02	0.02	0.03	0.05	0.05	0.03	0.14	0.06	0.08	0.07	0.07	0.12	0.09	0.1	0.02	0.02	0.02	0.03	0.02	0.03	0.02	0.03	0.03	0.03	0.01	0.02	0.03	0.02	0.07	0.03	0.02	0.03	0.03	0.03	0.02	0.12	0.03	0.03
cg04801003	ANTXR1	Pure Island	Within	0.07	0.06	0.06	0.08	0.04	0.04	0.04	0.03	0.03	0.02	0.06	0.06	0.04	0.05	0.06	0.15	0.05	0.04	0.43	0.36	0.63	0.79	0.2	0.03	0.03	0.04	0.03	0.03	0.03	0.04	0.04	0.03	0.04	0.04	0.51	0.52	0.47	0.58	0.85	0.12	0.04	0.06	0.03	0.06	0.07	0.03
cg04807655	TIAM1	Pure Island	Within	0.07	0.07	0.06	0.05	0.04	0.04	0.04	0.06	0.04	0.03	0.04	0.05	0.8	0.11	0.2	0.06	0.06	0.06	0.11	0.09	0.79	0.78	0.04	0.03	0.08	0.04	0.04	0.08	0.03	0.06	0.03	0.04	0.03	0.62	0.05	0.82	0.81	0.09	0.05	0.06	0.5	0.77	0.49	0.57	0.56	0.38
cg04809136	AC008073.5	Pure Island	Within	0.05	0.06	0.05	0.01	0.03	0.03	0.03	0.03	0.03	0.02	0.05	0.97	0.02	0.04	0.8	0.07	0.05	0.08	0.06	0.08	0.06	0.07	0.63	0.02	0.96	0.03	0.55	0.05	0.02	0.58	0.02	0.96	0.01	0.02	0.02	0.03	0.04	0.03	0.02	0.08	0.96	0.03	0.01	0.05	0.08	0.17
cg04809787	CHRNB1	Pure Island	Within	0.16	0.14	0.1	0.13	0.05	0.03	0.03	0.03	0.03	0.04	0.03	0.28	0.92	0.03	0.7	0.63	0.5	0.69	0.05	0.05	0.4	0.05	0.2	0.23	0.77	0.43	0.51	0.25	0.9	0.61	0.67	0.82	0.96	0.78	0.56	0.89	0.07	0.91	0.03	0.03	0.92	0.05	0.82	0.07	0.05	0.08
cg04836038	DOCK9	Pure Island	Within	0.07	0.08	0.08	0.1	0.04	0.04	0.04	0.05	0.03	0.03	0.07	0.17	0.96	0.08	0.08	0.06	0.07	0.06	0.09	0.08	0.09	0.17	0.04	0.03	0.04	0.04	0.03	0.04	0.03	0.04	0.04	0.12	0.03	0.04	0.07	0.07	0.09	0.1	0.08	0.09	0.12	0.11	0.04	0.12	0.08	0.04
cg04836786	HLTF	Pure Island	Within	0.05	0.07	0.03	0.02	0.02	0.02	0.02	0.02	0.03	0.02	0.18	0.04	0.03	0.03	0.25	0.05	0.05	0.04	0.95	0.52	0.95	0.96	0.01	0.02	0.02	0.02	0.01	0.01	0.02	0.02	0.02	0.02	0.01	0.02	0.98	0.58	0.96	0.03	0.6	0.08	0.47	0.05	0.03	0.11	0.05	0.02
cg04856689	CRHR1	Pure Island	Within	0.14	0.13	0.05	0.18	0.06	0.08	0.04	0.05	0.04	0.06	0.03	0.08	0.05	0.03	0.13	0.08	0.11	0.05	0.12	0.11	0.93	0.95	0.07	0.05	0.05	0.05	0.11	0.03	0.03	0.04	0.05	0.04	0.09	0.06	0.48	0.75	0.86	0.04	0.94	0.09	0.04	0.07	0.03	0.63	0.08	0.04
cg04875162	PABPC5	Associated Island	Within	0.1	0.1	0.08	0.2	0.11	0.08	0.06	0.07	0.07	0.21	0.12	0.06	0.91	0.8	0.37	0.58	0.76	0.38	0.77	0.77	0.81	0.8	0.49	0.58	0.52	0.88	0.05	0.79	0.04	0.55	0.04	0.07	0.09	0.81	0.89	0.84	0.83	0.87	0.87	0.9	0.9	0.9	0.73	0.67	0.74	0.34
cg04884908	CYP26B1	Pure Island	Within	0.08	0.08	0.08	0.07	0.08	0.08	0.07	0.1	0.11	0.02	0.08	0.63	0.65	0.36	0.4	0.61	0.1	0.23	0.43	0.48	0.91	0.89	0.44	0.07	0.09	0.57	0.05	0.1	0.07	0.24	0.14	0.56	0.05	0.25	0.88	0.9	0.87	0.63	0.91	0.59	0.86	0.17	0.83	0.88	0.8	0.06
cg04897683	NEUROG1	Pure Island	Within	0.11	0.12	0.1	0.02	0.04	0.05	0.07	0.04	0.02	0.05	0.05	0.92	0.94	0.56	0.53	0.88	0.55	0.17	0.89	0.89	0.89	0.91	0.43	0.91	0.66	0.93	0.05	0.52	0.93	0.43	0.14	0.94	0.7	0.89	0.91	0.93	0.76	0.88	0.94	0.92	0.95	0.16	0.9	0.84	0.76	0.8
cg04920951	GSTP1	Pure Island	Within	0.06	0.07	0.03	0.02	0.03	0.03	0.03	0.03	0.02	0.02	0.02	0.03	0.04	0.03	0.07	0.94	0.47	0.92	0.07	0.05	0.07	0.05	0.23	0.49	0.02	0.97	0.02	0.02	0.02	0.02	0.02	0.02	0.32	0.02	0.02	0.02	0.04	0.02	0.02	0.02	0.02	0.02	0.02	0.03	0.05	0.02
cg04922810	CRHR2	Pure Island	Within	0.1	0.07	0.06	0.03	0.05	0.05	0.06	0.08	0.04	0.02	0.09	0.38	0.15	0.43	0.81	0.8	0.41	0.44	0.87	0.87	0.89	0.91	0.23	0.23	0.18	0.82	0.18	0.16	0.09	0.42	0.1	0.49	0.04	0.9	0.9	0.9	0.85	0.93	0.9	0.48	0.92	0.27	0.88	0.87	0.8	0.22
cg04943986	NR2F2	Pure Island	Within	0.05	0.05	0.03	0.05	0.03	0.04	0.04	0.05	0.04	0.02	0.03	0.04	0.5	0.03	0.05	0.06	0.05	0.04	0.07	0.06	0.06	0.05	0.04	0.05	0.03	0.03	0.04	0.03	0.03	0.03	0.03	0.04	0.02	0.04	0.03	0.03	0.05	0.03	0.03	0.03	0.03	0.03	0.04	0.12	0.07	0.04
cg04949741	EFEMP2	Pure Island	Within	NA	NA	0.1	NA	0.14	0.14	0.13	0.14	0.16	0.18	0.09	0.25	0.22	0.1	NA	0.13	0.29	0.08	0.19	NA	NA	0.87	0.18	0.15	0.35	0.12	0.2	0.2	0.14	0.22	0.1	0.45	NA	0.22	0.09	0.13	0.37	0.8	0.42	0.12	0.61	0.12	0.13	0.54	0.15	0.1
cg04959788	PTCH2	Pure Island	Within	0.15	0.18	0.06	0.02	0.04	0.03	0.03	0.03	0.02	0.02	0.03	0.25	0.39	0.49	0.28	0.34	0.17	0.1	0.15	0.16	0.92	0.49	0.04	0.02	0.06	0.95	0.83	0.02	0.03	0.02	0.03	0.38	0.02	0.02	0.02	0.08	0.25	0.04	0.64	0.35	0.04	0.03	0.46	0.92	0.08	0.04
cg04961553	OCIAD2	Pure Island	Within	0.06	0.12	0.08	0.06	0.05	0.04	0.03	0.04	0.04	0.04	0.02	0.04	0.25	0.03	0.23	0.06	0.08	0.09	0.13	0.06	0.07	0.05	0.36	0.02	0.03	0.04	0.63	0.05	0.03	0.02	0.03	0.03	0.04	0.41	0.03	0.05	0.07	0.91	0.04	0.03	0.04	0.05	0.03	0.04	0.06	0.2
cg04969808	WNT7A	Pure Island	Within	0.08	0.08	0.06	0.08	0.09	0.1	0.1	0.12	0.1	0.04	0.06	0.87	0.14	0.07	0.07	0.93	0.14	0.68	0.09	0.1	0.96	0.95	0.07	0.04	0.05	0.94	0.05	0.05	0.06	0.04	0.08	0.05	0.18	0.04	0.96	0.95	0.73	0.47	0.97	0.6	0.97	0.06	0.95	0.18	0.62	0.19
cg04970117	SLC6A20	Pure Island	Within	0.05	0.07	0.03	0.03	0.07	0.05	0.05	0.07	0.06	0.05	0.05	0.93	0.56	0.53	0.79	0.92	0.9	0.6	0.27	0.37	0.06	0.94	0.27	0.03	0.39	0.95	0.06	0.04	0.01	0.02	0.02	0.11	0.07	0.02	0.03	0.02	0.04	0.28	0.35	0.03	0.64	0.02	0.01	0.48	0.07	0.83
cg04979725	C16orf28	Pure Island	Within	0.08	0.09	0.04	0.05	0.03	0.03	0.03	0.03	0.03	0.03	0.02	0.04	0.04	0.03	0.13	0.05	0.09	0.06	0.1	0.09	0.55	0.1	0.02	0.02	0.02	0.03	0.03	0.02	0.04	0.14	0.03	0.26	0.04	0.02	0.02	0.03	0.07	0.04	0.04	0.04	0.06	0.03	0.03	0.12	0.07	0.02
cg04981414	POMT1	Pure Island	Within	0.1	0.09	0.08	0.12	0.07	0.07	0.06	0.06	0.07	0.05	0.03	0.85	0.06	0.04	0.34	0.08	0.09	0.07	0.1	0.12	0.05	0.19	0.02	0.03	0.04	0.12	0.07	0.02	0.03	0.06	0.04	0.03	0.07	0.03	0.03	0.11	0.1	0.03	0.06	0.22	0.04	0.07	0.16	0.25	0.06	0.06
cg04988423	ALX4	Pure Island	Within	0.05	0.05	0.04	0.02	0.03	0.04	0.03	0.03	0.03	0.02	0.04	0.86	0.19	0.29	0.62	0.93	0.21	0.53	0.93	0.88	0.93	0.91	0.3	0.98	0.03	0.97	0.02	0.25	0.02	0.02	0.04	0.16	0.51	0.37	0.95	0.97	0.94	0.97	0.98	0.93	0.43	0.04	0.96	0.89	0.76	0.28
cg05016953	SLC6A4	Pure Island	Within	0.04	0.03	0.03	0.18	0.04	0.03	0.03	0.03	0.03	0.03	0.04	0.93	0.29	0.93	0.42	0.05	0.1	0.03	0.3	0.12	0.86	0.81	0.33	0.43	0.1	0.07	0.57	0.21	0.02	0.09	0.05	0.88	0.77	0.21	0.96	0.95	0.24	0.02	0.96	0.94	0.97	0.04	0.81	0.84	0.21	0.15
cg05022306	HOXC8	Pure Island	Within	0.25	0.2	0.1	0.15	0.05	0.06	0.08	0.07	0.05	0.11	0.07	0.05	0.19	0.04	0.37	0.37	0.86	0.91	0.11	0.12	0.94	0.33	0.03	0.11	0.02	0.91	0.96	0.34	0.37	0.04	0.04	0.03	0.21	0.09	0.94	0.87	0.41	0.03	0.22	0.14	0.03	0.05	0.08	0.91	0.65	0.04
cg05073845	FOXO1A	Pure Island	Within	0.09	0.08	0.04	0.01	0.02	0.02	0.02	0.02	0.02	0.01	0.02	0.04	0.03	0.04	0.08	0.06	0.06	0.05	0.13	0.11	0.09	0.07	0.02	0.02	0.02	0.03	0.02	0.02	0.02	0.02	0.02	0.02	0.01	0.02	0.05	0.03	0.04	0.03	0.02	0.05	0.09	0.03	0.02	0.14	0.1	0.02
cg05076631	PGF	Pure Island	Within	0.17	0.07	0.06	0.06	0.11	0.12	0.11	0.12	0.12	0.06	0.07	0.06	0.08	0.09	0.07	0.12	0.1	0.09	0.2	0.1	0.19	0.67	0.05	0.04	0.07	0.12	0.06	0.07	0.06	0.06	0.08	0.08	0.05	0.09	0.05	0.08	0.15	0.41	0.66	0.22	0.1	0.08	0.06	0.12	0.61	0.09
cg05079045	APBB1	Pure Island	Within	0.03	0.04	0.03	0.03	0.04	0.05	0.03	0.05	0.04	0.03	0.05	0.02	0.34	0.13	0.04	0.06	0.04	0.03	0.04	0.03	0.25	0.05	0.01	0.01	0.01	0.03	0.02	0.01	0.01	0.01	0.02	0.05	0.03	0.01	0.03	0.02	0.06	0.02	0.01	0.63	0.02	0.04	0.02	0.03	0.05	0.02
cg05090725	RAB39	Pure Island	Within	0.03	0.05	0.03	0.01	0.06	0.03	0.05	0.04	0.03	0.02	0.03	0.98	0.01	0.03	0.05	0.05	0.04	0.03	0.04	0.03	0.96	0.98	0.01	0.01	0.01	0.02	0.02	0.01	0.01	0.01	0.02	0.02	0.01	0.01	0.98	0.12	0.63	0.82	0.98	0.39	0.02	0.03	0.02	0.15	0.05	0.95
cg05101920	KCNJ10	Pure Island	Within	0.06	0.15	0.17	0.04	0.09	0.08	0.11	0.11	0.08	0.03	0.12	0.1	0.26	0.3	0.59	0.56	0.61	0.42	0.14	0.28	0.65	0.76	0.61	0.08	0.42	0.73	0.37	0.16	0.05	0.17	0.24	0.4	0.25	0.08	0.43	0.71	0.51	0.06	0.46	0.22	0.74	0.31	0.09	0.44	0.23	0.09
cg05119831	PTPRN2	Pure Island	Within	0.06	0.09	0.06	0.1	0.07	0.07	0.05	0.07	0.05	0.03	0.04	0.12	0.09	0.05	0.09	0.04	0.41	0.07	0.06	0.05	0.04	0.05	0.02	0.02	0.02	0.03	0.17	0.03	0.04	0.02	0.03	0.03	0.05	0.03	0.04	0.03	0.04	0.6	0.03	0.03	0.17	0.05	0.05	0.09	0.06	0.08
cg05120641	CHAC1	Pure Island	Within	0.06	0.06	0.03	0.01	0.03	0.03	0.02	0.03	0.03	0.02	0.03	0.04	0.44	0.03	0.09	0.04	0.05	0.04	0.06	0.05	0.06	0.05	0.01	0.01	0.01	0.03	0.01	0.02	0.01	0.01	0.02	0.02	0.01	0.02	0.01	0.02	0.05	0.02	0.02	0.02	0.03	0.04	0.04	0.05	0.06	0.02
cg05146762	GTF2IRD1	Pure Island	Within	0.11	0.13	0.07	0.03	0.05	0.06	0.05	0.05	0.04	0.03	0.05	0.12	0.07	0.06	0.14	0.08	0.16	0.1	0.12	0.13	0.14	0.12	0.07	0.06	0.06	0.06	0.05	0.05	0.06	0.05	0.07	0.06	0.04	0.05	0.14	0.07	0.08	0.05	0.06	0.13	0.06	0.05	0.04	0.08	0.09	0.05
cg05164185	CCND1	Pure Island	Within	NA	NA	0.06	NA	0.08	0.18	0.15	0.12	0.08	0.22	0.05	0.11	0.11	0.07	0.11	0.07	0.08	0.07	0.06	0.09	0.1	NA	0.08	0.06	0.06	0.05	0.05	0.06	0.08	0.09	0.05	0.08	NA	0.09	0.1	0.13	0.07	0.08	0.11	0.06	0.11	0.08	0.05	0.15	0.08	0.04
cg05203877	SLC8A3	Pure Island	Within	0.12	0.12	0.08	0.06	0.05	0.06	0.05	0.05	0.04	0.05	0.08	0.07	0.4	0.43	0.25	0.16	0.23	0.08	0.11	0.39	0.76	0.79	0.15	0.04	0.08	0.33	0.04	0.2	0.04	0.04	0.23	0.27	0.11	0.04	0.9	0.88	0.77	0.23	0.9	0.3	0.42	0.84	0.58	0.74	0.73	0.06
cg05205664	UCP2	Pure Island	Within	0.16	0.18	0.09	0.04	0.06	0.05	0.05	0.06	0.04	0.07	0.12	0.09	0.06	0.67	0.88	0.09	0.11	0.09	0.17	0.2	0.25	0.17	0.04	0.03	0.03	0.04	0.03	0.04	0.03	0.04	0.04	0.41	0.05	0.06	0.05	0.54	0.08	0.03	0.03	0.05	0.09	0.05	0.04	0.15	0.09	0.04
cg05229898	EGR1	Pure Island	Within	0.06	0.07	0.04	0.06	0.04	0.04	0.04	0.04	0.03	0.05	0.02	0.03	0.03	0.02	0.09	0.05	0.06	0.05	0.07	0.08	0.06	0.05	0.02	0.02	0.02	0.02	0.03	0.02	0.01	0.01	0.02	0.08	0.03	0.02	0.02	0.03	0.03	0.02	0.02	0.14	0.03	0.03	0.05	0.08	0.05	0.03
cg05266781	IRX5	Pure Island	Within	0.08	0.08	0.05	0.12	0.03	0.03	0.12	0.04	0.03	0.03	0.04	0.82	0.03	0.04	0.15	0.07	0.07	0.06	0.07	0.19	0.92	0.9	0.08	0.02	0.04	0.03	0.03	0.02	0.03	0.04	0.03	0.45	0.95	0.03	0.94	0.45	0.06	0.06	0.95	0.93	0.03	0.05	0.06	0.87	0.12	0.04
cg05276137	SLC2A4RG	Pure Island	Within	0.05	0.07	0.05	0.03	0.04	0.03	0.04	0.05	0.03	0.02	0.13	0.09	0.22	0.08	0.64	0.08	0.3	0.05	0.19	0.06	0.08	0.07	0.08	0.03	0.02	0.04	0.02	0.06	0.15	0.03	0.02	0.07	0.11	0.06	0.03	0.07	0.04	0.03	0.33	0.06	0.1	0.04	0.05	0.17	0.05	0.18
cg05284582	DNAJC18	Pure Island	Within	0.11	0.07	0.05	0.03	0.03	0.03	0.03	0.03	0.03	0.03	0.03	0.87	0.04	0.05	0.09	0.06	0.06	0.06	0.09	0.11	0.12	0.1	0.02	0.02	0.03	0.03	0.04	0.02	0.02	0.02	0.03	0.02	0.03	0.02	0.03	0.04	0.08	0.03	0.03	0.06	0.05	0.04	0.03	0.08	0.06	0.03
cg05286874	ABCA1	Pure Island	Within	0.05	0.07	0.03	0.04	0.02	0.02	0.02	0.02	0.02	0.03	0.09	0.64	0.03	0.39	0.55	0.65	0.06	0.04	0.1	0.28	0.94	0.96	0.01	0.02	0.02	0.97	0.02	0.01	0.03	0.09	0.02	0.47	0.04	0.97	0.02	0.93	0.04	0.02	0.09	0.05	0.42	0.03	0.03	0.42	0.05	0.02
cg05288803	TIMP3	Pure Island	Within	0.08	0.08	0.04	0.02	0.02	0.03	0.03	0.03	0.03	0.02	0.02	0.04	0.51	0.03	0.09	0.06	0.51	0.05	0.07	0.09	0.95	0.86	0.26	0.44	0.03	0.02	0.03	0.33	0.02	0.05	0.08	0.02	0.03	0.02	0.14	0.06	0.93	0.02	0.02	0.96	0.97	0.04	0.94	0.39	0.05	0.03
cg05307923	ADARB2	Pure Island	Within	0.1	0.08	0.06	0.02	0.04	0.04	0.04	0.05	0.04	0.07	0.15	0.06	0.28	0.03	0.08	0.37	0.51	0.12	0.62	0.21	0.81	0.84	0.15	0.08	0.3	0.46	0.03	0.28	0.02	0.03	0.07	0.03	0.03	0.39	0.33	0.29	0.62	0.45	0.75	0.37	0.6	0.15	0.74	0.73	0.42	0.34
cg05311623	ANXA5	Pure Island	Within	0.06	0.07	0.06	0.07	0.09	0.11	0.09	0.12	0.1	0.1	0.05	0.05	0.05	0.05	0.06	0.09	0.11	0.09	0.07	0.11	0.06	0.05	0.03	0.04	0.05	0.04	0.05	0.04	0.04	0.03	0.04	0.04	0.06	0.04	0.05	0.05	0.06	0.04	0.04	0.06	0.05	0.06	0.04	0.06	0.09	0.05
cg05325699	HAP1	Pure Island	Within	0.05	0.03	0.04	0.02	0.05	0.05	0.05	0.07	0.06	0.04	0.06	0.03	0.14	0.05	0.07	0.13	0.07	0.04	0.04	0.04	0.87	0.74	0.02	0.06	0.02	0.04	0.02	0.02	0.02	0.02	0.06	0.02	0.02	0.02	0.7	0.77	0.34	0.1	0.64	0.24	0.02	0.03	0.02	0.51	0.58	0.06
cg05338155	LIPA	Associated Island	Within	0.04	0.03	0.02	0.02	0.04	0.04	0.06	0.06	0.04	0.02	0.03	0.02	0.09	0.04	0.04	0.14	0.07	0.04	0.2	0.04	0.06	0.03	0.02	0.02	0.02	0.71	0.01	0.01	0.02	0.01	0.03	0.01	0.01	0.05	0.01	0.01	0.05	0.79	0.01	0.02	0.02	0.02	0.02	0.06	0.06	0.04
cg05354432	LEF1	Pure Island	Within	0.05	0.04	0.03	0.06	0.07	0.06	0.05	0.06	0.04	0.05	0.03	0.04	0.04	0.48	0.06	0.05	0.07	0.05	0.06	0.05	0.93	0.05	0.09	0.01	0.02	0.02	0.05	0.02	0.02	0.02	0.02	0.02	0.05	0.02	0.02	0.03	0.43	0.04	0.03	0.04	0.03	0.04	0.03	0.9	0.06	0.3
cg05361373	PYCARD	Pure Island	Within	0.08	0.15	0.13	0.1	0.09	0.08	0.09	0.09	0.09	0.09	0.06	0.94	0.06	0.18	0.63	0.08	0.08	0.68	0.09	0.38	0.88	0.88	0.97	0.07	0.58	0.07	0.79	0.13	0.12	0.61	0.07	0.96	0.98	0.95	0.06	0.93	0.09	0.95	0.95	0.14	0.93	0.08	0.05	0.9	0.09	0.93
cg05362516	IRX5	Pure Island	Within	0.08	0.07	0.06	0.03	0.04	0.04	0.03	0.04	0.04	0.02	0.04	0.85	0.05	0.03	0.06	0.07	0.06	0.05	0.11	0.07	0.43	0.89	0.03	0.02	0.03	0.04	0.02	0.03	0.03	0.03	0.03	0.03	0.67	0.02	0.94	0.05	0.06	0.05	0.04	0.08	0.03	0.05	0.04	0.52	0.08	0.03
cg05362669	PTPRG	Pure Island	Within	0.08	0.08	0.1	0.03	0.05	0.06	0.06	0.06	0.05	0.03	0.08	0.06	0.07	0.1	0.07	0.09	0.07	0.06	0.1	0.5	0.07	0.11	0.19	0.06	0.07	0.06	0.05	0.12	0.06	0.05	0.06	0.06	0.03	0.1	0.11	0.11	0.17	0.13	0.05	0.06	0.13	0.09	0.06	0.09	0.09	0.06
cg05368341	SYT6	Pure Island	Within	0.05	0.04	0.04	0.05	0.04	0.05	0.03	0.04	0.06	0.03	0.04	0.07	0.5	0.44	0.15	0.52	0.59	0.37	0.84	0.79	0.91	0.96	0.08	0.03	0.07	0.65	0.47	0.12	0.05	0.75	0.08	0.83	0.29	0.04	0.76	0.47	0.69	0.95	0.93	0.41	0.96	0.41	0.42	0.62	0.53	0.56
cg05369142	ALS2CL	Pure Island	Within	0.07	0.06	0.06	0.02	0.02	0.02	0.02	0.02	0.02	0.01	0.02	0.03	0.03	0.02	0.45	0.04	0.08	0.03	0.06	0.07	0.07	0.05	0.01	0.98	0.02	0.02	0.02	0.01	0.4	0.01	0.02	0.04	0.02	0.03	0.02	0.02	0.04	0.63	0.02	0.02	0.02	0.02	0.02	0.06	0.03	0.02
cg05380982	KCNJ6	Pure Island	Within	0.12	0.08	0.11	0.06	0.07	0.07	0.08	0.08	0.08	0.05	0.13	0.08	0.48	0.23	0.39	0.56	0.38	0.16	0.43	0.47	0.89	0.88	0.24	0.05	0.05	0.52	0.04	0.49	0.04	0.04	0.24	0.47	0.03	0.32	0.87	0.73	0.81	0.89	0.86	0.9	0.9	0.12	0.42	0.79	0.53	0.46
cg05395995	N6AMT2	Pure Island	Within	0.11	0.11	0.06	0.03	0.05	0.09	0.06	0.09	0.07	0.12	0.05	0.94	0.07	0.05	0.2	0.08	0.11	0.1	0.15	0.25	0.19	0.12	0.05	0.03	0.04	0.04	0.05	0.04	0.04	0.03	0.03	0.04	0.1	0.1	0.03	0.06	0.12	0.05	0.07	0.09	0.07	0.06	0.05	0.19	0.12	0.09
cg05396987	TMEM155	Associated Island	Within	0.06	0.08	0.05	0.02	0.05	0.04	0.04	0.04	0.03	0.03	0.07	0.53	0.85	0.25	0.6	0.73	0.67	0.65	0.72	0.77	0.82	0.84	0.86	0.37	0.13	0.79	0.35	0.33	0.81	0.04	0.05	0.03	0.03	0.68	0.81	0.84	0.75	0.83	0.82	0.83	0.86	0.28	0.84	0.69	0.29	0.05
cg05399360	MICB	Pure Island	Within	0.03	0.04	0.03	0.16	0.06	0.04	0.04	0.06	0.06	0.11	0.05	0.92	0.02	0.03	0.35	0.04	0.05	0.03	0.06	0.04	0.14	0.03	0.01	0.02	0.02	0.03	0.03	0.01	0.02	0.13	0.02	0.36	0.13	0.02	0.02	0.03	0.09	0.02	0.03	0.03	0.39	0.04	0.03	0.09	0.05	0.04
cg05417985	ENPP1	Pure Island	Within	0.03	0.02	0.01	0.01	0.02	0.02	0.02	0.02	0.02	0.01	0.02	0.01	0.01	0.18	0.02	0.02	0.03	0.02	0.04	0.03	0.02	0.02	0	0.01	0.01	0.01	0.02	0.01	0.01	0.01	0.02	0.01	0.01	0.01	0.01	0.01	0.02	0.01	0.01	0.01	0.02	0.01	0.01	0.07	0.1	0.02
cg05421673	NOG	Pure Island	Within	0.06	0.08	0.07	0.05	0.07	0.06	0.07	0.06	0.05	0.04	0.08	0.06	0.06	0.07	0.07	0.1	0.09	0.07	0.09	0.89	0.93	0.92	0.07	0.05	0.06	0.1	0.04	0.07	0.05	0.06	0.09	0.07	0.06	0.06	0.91	0.93	0.8	0.11	0.92	0.45	0.08	0.09	0.07	0.53	0.09	0.06
cg05434957	ICA1	Pure Island	Within	0.09	0.09	0.05	0.02	0.03	0.03	0.02	0.02	0.03	0.02	0.03	0.72	0.05	0.03	0.17	0.05	0.06	0.06	0.12	0.12	0.09	0.07	0.02	0.02	0.01	0.02	0.02	0.02	0.02	0.02	0.02	0.02	0.02	0.02	0.02	0.02	0.03	0.02	0.02	0.02	0.46	0.04	0.02	0.08	0.07	0.02
cg05436658	PRKCB	Pure Island	Within	0.1	0.12	0.1	0.05	0.04	0.06	0.05	0.05	0.04	0.05	0.17	0.46	0.04	0.92	0.68	0.87	0.81	0.8	0.79	0.86	0.9	0.83	0.17	0.11	0.34	0.95	0.04	0.3	0.02	0.25	0.15	0.58	0.93	0.16	0.94	0.93	0.89	0.93	0.93	0.95	0.93	0.74	0.94	0.65	0.87	0.12
cg05472874	SULT4A1	Pure Island	Within	0.03	0.05	0.04	0.02	0.03	0.04	0.03	0.05	0.02	0.02	0.08	0.49	0.96	0.55	0.34	0.92	0.54	0.96	0.84	0.92	0.95	0.92	0.12	0.01	0.96	0.94	0.02	0.02	0.02	0.88	0.03	0.97	0.01	0.97	0.97	0.97	0.86	0.95	0.97	0.78	0.96	0.02	0.98	0.22	0.95	0.14
cg05492845	VEGFB	Pure Island	Within	0.04	0.05	0.04	0.02	0.03	0.04	0.03	0.05	0.05	0.02	0.03	0.1	0.05	0.05	0.07	0.07	0.04	0.04	0.08	0.06	0.05	0.05	0.03	0.02	0.03	0.04	0.05	0.02	0.03	0.02	0.03	0.03	0.02	0.02	0.04	0.02	0.09	0.04	0.03	0.13	0.1	0.03	0.06	0.28	0.07	0.05
cg05497616	CAMK4	Pure Island	Within	0.07	0.05	0.04	0.04	0.03	0.03	0.02	0.04	0.03	0.03	0.05	0.04	0.04	0.19	0.08	0.78	0.07	0.36	0.19	0.08	0.82	0.81	0.02	0.02	0.03	0.28	0.02	0.09	0.01	0.06	0.05	0.02	0.02	0.02	0.96	0.24	0.95	0.4	0.95	0.25	0.63	0.02	0.95	0.06	0.15	0.11
cg05523047	VLDLR	Pure Island	Within	0.03	0.02	0.03	0.02	0.03	0.04	0.03	0.02	0.02	0.03	0.02	0.02	0.02	0.04	0.07	0.05	0.04	0.04	0.04	0.02	0.95	0.93	0.01	0.01	0.01	0.03	0.04	0.02	0.01	0.01	0.02	0.02	0.04	0.01	0.01	0.96	0.31	0.02	0.03	0.03	0.27	0.05	0.02	0.95	0.14	0.03
cg05556210	ATBF1	Pure Island	Within	0.07	0.07	0.07	0.03	0.04	0.05	0.06	0.06	0.04	0.02	0.02	0.15	0.07	0.05	0.1	0.09	0.08	0.06	0.08	0.08	0.08	0.06	0.26	0.08	0.05	0.05	0.15	0.06	0.04	0.04	0.05	0.11	0.03	0.43	0.06	0.05	0.07	0.05	0.04	0.05	0.07	0.05	0.04	0.08	0.06	0.04
cg05589246	HOXC12	Pure Island	Within	0.21	0.14	0.16	0.03	0.14	0.13	0.1	0.11	0.08	0.05	0.1	0.81	0.64	0.44	0.24	0.42	0.14	0.47	0.86	0.9	0.88	0.91	0.27	0.4	0.91	0.82	0.7	0.27	0.2	0.87	0.17	0.93	0.43	0.04	0.46	0.79	0.3	0.11	0.93	0.59	0.91	0.57	0.88	0.91	0.51	0.9
cg05595345	ARRDC4	Pure Island	Within	0.06	0.05	0.03	0.01	0.02	0.02	0.02	0.02	0.02	0.01	0.01	0.03	0.03	0.02	0.16	0.04	0.37	0.04	0.05	0.07	0.06	0.06	0.29	0.02	0.09	0.02	0.02	0.42	0.01	0.01	0.02	0.02	0.01	0.01	0.02	0.02	0.04	0.88	0.02	0.03	0.98	0.02	0.02	0.06	0.04	0.02
cg05607127	KCNG3	Pure Island	Within	0.06	0.03	0.05	0.03	0.04	0.04	0.04	0.04	0.04	0.03	0.04	0.04	0.05	0.07	0.07	0.06	0.14	0.05	0.11	0.08	0.9	0.9	0.04	0.04	0.04	0.04	0.03	0.04	0.04	0.04	0.04	0.05	0.03	0.04	0.29	0.04	0.21	0.05	0.08	0.05	0.04	0.04	0.04	0.09	0.11	0.04
cg05608188	TMEM168	Pure Island	Within	0.06	0.09	0.05	0.03	0.05	0.07	0.05	0.05	0.07	0.1	0.04	0.05	0.06	0.04	0.06	0.06	0.09	0.07	0.09	0.08	0.08	0.14	0.03	0.03	0.03	0.03	0.04	0.02	0.03	0.02	0.03	0.03	0.06	0.04	0.03	0.04	0.08	0.04	0.04	0.04	0.05	0.9	0.1	0.16	0.06	0.05
cg05621401	RET	Pure Island	Within	0.12	0.15	0.09	0.19	0.05	0.06	0.07	0.05	0.06	0.06	0.03	0.85	0.04	0.14	0.12	0.17	0.56	0.07	0.69	0.16	0.95	0.96	0.09	0.04	0.03	0.6	0.36	0.22	0.05	0.07	0.04	0.4	0.08	0.03	0.78	0.99	0.94	0.89	0.99	0.97	0.99	0.05	0.99	0.64	0.81	0.14
cg05628549	PRKCDBP	Pure Island	Within	0.05	0.04	0.07	0.03	0.03	0.05	0.04	0.04	0.03	0.07	0.05	0.96	0.97	0.04	0.95	0.92	0.72	0.8	0.07	0.04	0.37	0.34	0.26	0.31	0.98	0.96	0.04	0.02	0.85	0.43	0.39	0.97	0.98	0.37	0.06	0.97	0.37	0.71	0.97	0.39	0.39	0.31	0.97	0.13	0.06	0.03
cg05655556	PSMD2	Pure Island	Within	0.06	0.06	0.05	0.08	0.04	0.04	0.06	0.05	0.04	0.02	0.1	0.03	0.04	0.15	0.4	0.06	0.06	0.03	0.19	0.05	0.08	0.25	0.02	0.01	0.03	0.03	0.02	0.03	0.02	0.02	0.03	0.11	0.1	0.02	0.04	0.1	0.06	0.03	0.04	0.58	0.25	0.03	0.02	0.57	0.06	0.03
cg05661333	GABBR1	Pure Island	Within	0.05	0.05	0.08	0.05	0.04	0.04	0.03	0.04	0.04	0.03	0.03	0.05	0.42	0.04	0.07	0.06	0.07	0.05	0.05	0.07	0.07	0.05	0.03	0.09	0.03	0.03	0.06	0.03	0.03	0.03	0.03	0.04	0.04	0.03	0.04	0.04	0.09	0.23	0.04	0.05	0.04	0.04	0.03	0.08	0.16	0.04
cg05670348	LARGE	Pure Island	Within	0.09	0.06	0.09	0.14	0.03	0.03	0.02	0.03	0.03	0.01	0.14	0.04	0.8	0.52	0.62	0.06	0.79	0.05	0.06	0.07	0.06	0.05	0.32	0.03	0.02	0.02	0.03	0.02	0.02	0.02	0.02	0.02	0.01	0.03	0.05	0.06	0.06	0.73	0.03	0.16	0.18	0.06	0.14	0.14	0.07	0.74
cg05670408	MAN1C1	Pure Island	Within	0.07	0.08	0.08	0.04	0.06	0.07	0.08	0.07	0.08	0.03	0.05	0.07	0.05	0.21	0.17	0.1	0.11	0.07	0.37	0.12	0.93	0.93	0.09	0.05	0.11	0.08	0.1	0.18	0.26	0.06	0.06	0.17	0.06	0.05	0.49	0.46	0.43	0.06	0.51	0.11	0.93	0.05	0.07	0.77	0.11	0.06
cg05675373	KCNC4	Pure Island	Within	0.09	0.12	0.12	0.02	0.03	0.03	0.04	0.03	0.04	0.03	0.22	0.94	0.77	0.37	0.93	0.92	0.57	0.95	0.92	0.9	0.93	0.88	0.83	0.3	0.98	0.97	0.24	0.68	0.31	0.98	0.57	0.97	0.98	0.94	0.97	0.98	0.95	0.97	0.96	0.24	0.97	0.16	0.98	0.88	0.95	0.51
cg05677402	UBE2L6	Pure Island	Within	0.05	0.09	0.03	0.02	0.02	0.02	0.02	0.02	0.01	0.02	0.01	0.03	0.02	0.03	0.07	0.06	0.06	0.04	0.61	0.27	0.06	0.22	0.01	0.49	0.01	0.02	0.02	0.01	0.01	0.01	0.04	0.03	0.01	0.91	0.03	0.02	0.07	0.6	0.02	0.02	0.02	0.02	0.01	0.1	0.03	0.01
cg05702737	WNT10A	Pure Island	Within	0.15	0.12	0.09	0.06	0.06	0.06	0.06	0.07	0.07	0.04	0.07	0.67	0.07	0.11	0.33	0.78	0.4	0.23	0.12	0.1	0.89	0.84	0.36	0.05	0.49	0.81	0.51	0.06	0.09	0.1	0.15	0.12	0.06	0.07	0.91	0.89	0.52	0.76	0.51	0.1	0.62	0.06	0.04	0.46	0.08	0.13
cg05705366	SNX18	Pure Island	Within	0.07	0.07	0.06	0.04	0.04	0.04	0.04	0.04	0.04	0.02	0.06	0.04	0.06	0.06	0.08	0.07	0.09	0.06	0.09	0.09	0.07	0.9	0.03	0.04	0.03	0.04	0.05	0.04	0.03	0.03	0.04	0.03	0.02	0.04	0.05	0.05	0.07	0.05	0.13	0.44	0.04	0.05	0.04	0.07	0.06	0.04
cg05714219	GALNT14	Pure Island	Within	0.07	0.11	0.06	0.05	0.05	0.03	0.04	0.04	0.03	0.03	0.04	0.05	0.05	0.08	0.08	0.28	0.09	0.07	0.88	0.85	0.89	0.91	0.03	0.03	0.03	0.03	0.03	0.04	0.03	0.04	0.05	0.03	0.03	0.04	0.88	0.92	0.4	0.89	0.87	0.05	0.91	0.06	0.04	0.63	0.09	0.05
cg05743054	MLF1	Pure Island	Within	0.02	0.02	0.02	0.01	0.03	0.03	0.03	0.03	0.03	0.02	0.02	0.02	0.58	0.05	0.02	0.03	0.03	0.03	0.04	0.03	0.91	0.92	0.01	0.01	0.01	0.02	0.01	0.01	0.01	0.01	0.02	0.01	0.01	0.01	0.05	0.03	0.07	0.39	0.01	0.02	0.02	0.02	0.01	0.04	0.06	0.02
cg05745851	CCDC62	Pure Island	Within	0.06	0.07	0.04	0.03	0.03	0.04	0.03	0.03	0.04	0.03	0.03	0.92	0.04	0.04	0.66	0.06	0.09	0.45	0.06	0.05	0.06	0.15	0.33	0.02	0.94	0.03	0.02	0.02	0.02	0.48	0.03	0.83	0.02	0.44	0.03	0.02	0.03	0.02	0.03	0.03	0.02	0.04	0.03	0.81	0.08	0.07
cg05751159	TSGA14	Pure Island	Within	0.06	0.07	0.05	0.04	0.03	0.02	0.03	0.03	0.03	0.02	0.03	0.04	0.04	0.04	0.06	0.05	0.08	0.04	0.08	0.05	0.9	0.06	0.03	0.03	0.02	0.03	0.03	0.02	0.03	0.02	0.02	0.03	0.02	0.03	0.06	0.05	0.04	0.06	0.03	0.04	0.04	0.04	0.02	0.1	0.04	0.02
cg05764376	LRRC49	Associated Island	Within	0.05	0.05	0.03	0.02	0.04	0.03	0.03	0.04	0.04	0.02	0.03	0.02	0.98	0.03	0.06	0.04	0.05	0.03	0.06	0.03	0.04	0.03	0.01	0.01	0.01	0.02	0.02	0.01	0.01	0.01	0.03	0.02	0.01	0.01	0.02	0.01	0.03	0.02	0.02	0.02	0.02	0.02	0.02	0.06	0.05	0.03
cg05769161	B4GALNT3	Pure Island	Within	0.14	0.1	0.08	0.16	0.07	0.07	0.08	0.07	0.09	0.15	0.08	0.24	0.54	0.21	0.29	0.09	0.12	0.06	0.21	0.26	0.17	NA	0.1	0.09	0.05	0.05	0.06	0.08	0.04	0.12	0.1	0.94	0.04	0.07	0.13	0.18	0.12	0.04	0.2	0.53	0.74	0.15	0.14	0.14	0.12	0.14
cg05769169	EGLN3	Pure Island	Within	0.07	0.08	0.06	0.05	0.04	0.03	0.04	0.04	0.03	0.08	0.03	0.26	0.94	0.07	0.14	0.04	0.06	0.03	0.07	0.04	0.05	NA	0.04	0.02	0.02	0.03	0.04	0.03	0.02	0.02	0.02	0.02	0.04	0.02	0.03	0.03	0.04	0.03	0.08	0.04	0.31	0.05	0.02	0.72	0.41	0.05
cg05786809	CKB	Pure Island	Within	0.05	0.09	0.06	0.03	0.03	0.04	0.04	0.04	0.03	0.03	0.03	0.38	0.11	0.62	0.93	0.8	0.07	0.33	0.89	0.86	0.85	NA	0.02	0.02	0.02	0.91	0.03	0.02	0.02	0.02	0.11	0.45	0.03	0.03	0.92	0.65	0.87	0.91	0.91	0.88	0.95	0.05	0.93	0.2	0.85	0.02
cg05801648	SYK	Pure Island	Within	0.12	0.14	0.1	0.17	0.11	0.12	0.14	0.12	0.13	0.17	0.08	0.85	0.11	0.33	0.37	0.1	0.16	0.09	0.13	0.16	0.12	0.32	0.35	0.05	0.65	0.06	0.11	0.5	0.06	0.12	0.07	0.51	0.45	0.21	0.06	0.05	0.11	0.17	0.07	0.12	0.94	0.11	0.06	0.52	0.13	0.36
cg05813084	EFNA3	Pure Island	Within	0.08	0.08	0.04	0.06	0.05	0.06	0.06	0.07	0.06	0.07	0.06	0.06	0.06	0.04	0.07	0.05	0.09	0.05	0.11	0.09	0.07	0.05	0.03	0.03	0.03	0.03	0.03	0.04	0.03	0.04	0.04	0.05	0.04	0.04	0.04	0.04	0.08	0.06	0.05	0.06	0.05	0.05	0.03	0.07	0.08	0.05
cg05824484	IL17RA	Pure Island	Within	0.07	0.07	0.07	0.02	0.04	0.03	0.03	0.04	0.04	0.02	0.05	0.06	0.05	0.07	0.08	0.06	0.08	0.05	0.1	0.09	0.06	0.09	0.02	0.02	0.02	0.03	0.02	0.02	0.03	0.02	0.03	0.02	0.02	0.06	0.04	0.04	0.04	0.09	0.03	0.05	0.04	0.09	0.03	0.07	0.06	0.03
cg05832051	MYADM	Pure Island	Within	0.07	0.07	0.05	0.07	0.05	0.06	0.06	0.06	0.07	0.08	0.04	0.07	0.67	0.06	0.3	0.48	0.63	0.09	0.1	0.1	0.76	0.07	0.04	0.03	0.03	0.84	0.04	0.03	0.13	0.03	0.14	0.06	0.05	0.05	0.04	0.45	0.12	0.53	0.04	0.1	0.06	0.06	0.05	0.1	0.08	0.04
cg05847778	BBS5	Pure Island	Within	0.1	0.09	0.06	0.05	0.03	0.04	0.03	0.03	0.03	0.05	0.1	0.17	0.04	0.17	0.17	0.09	0.11	0.06	0.29	0.12	0.75	0.75	0.02	0.02	0.02	0.17	0.02	0.03	0.02	0.03	0.03	0.03	0.05	0.03	0.22	0.03	0.2	0.04	0.21	0.04	0.03	0.04	0.03	0.2	0.14	0.04
cg05860890	KCNV1	Pure Island	Within	0.08	0.05	0.08	0.03	0.04	0.06	0.06	0.06	0.05	0.02	0.07	0.26	0.91	0.17	0.28	0.15	0.67	0.09	0.22	0.1	0.86	0.91	0.08	0.05	0.07	0.31	0.06	0.24	0.05	0.05	0.05	0.1	0.03	0.08	0.06	0.17	0.8	0.3	0.14	0.23	0.9	0.44	0.76	0.5	0.63	0.09
cg05868316	FBXW9	Pure Island	Within	0.04	0.04	0.03	0.02	0.02	0.02	0.02	0.02	0.03	0.05	0.02	0.03	0.03	0.02	0.04	0.04	0.05	0.03	0.07	0.03	0.04	0.05	0.01	0.02	0.02	0.02	0.02	0.01	0.02	0.01	0.02	0.95	0.02	0.02	0.02	0.02	0.03	0.02	0.03	0.02	0.02	0.03	0.02	0.06	0.1	0.02
cg05876918	PIP4K2C	Pure Island	Within	0.1	0.12	0.07	0.07	0.09	0.09	0.08	0.07	0.1	0.15	0.07	0.07	0.41	0.06	0.08	0.07	0.09	0.07	0.08	0.09	0.08	0.07	0.04	0.04	0.03	0.05	0.05	0.04	0.06	0.05	0.06	0.05	0.07	0.04	0.05	0.06	0.11	0.08	0.07	0.06	0.06	0.08	0.06	0.15	0.14	0.05
cg05882522	CAPN14	Associated Island	Within	0.06	0.06	0.05	0.07	0.04	0.05	0.05	0.05	0.04	0.06	0.04	0.06	0.07	0.07	0.08	0.1	0.07	0.05	0.67	0.5	0.86	0.86	0.08	0.04	0.03	0.04	0.03	0.07	0.04	0.03	0.04	0.18	0.04	0.48	0.13	0.34	0.69	0.85	0.79	0.2	0.58	0.06	0.04	0.7	0.08	0.04
cg05899618	GDF7	Pure Island	Within	0.18	0.2	0.1	0.05	0.11	0.03	0.09	0.11	0.05	0.05	0.09	0.93	0.75	0.64	0.87	0.91	0.86	0.91	0.61	0.78	0.92	0.93	0.4	0.09	0.96	0.95	0.56	0.81	0.33	0.26	0.17	0.95	0.47	0.1	0.95	0.95	0.87	0.94	0.96	0.93	0.95	0.06	0.92	0.85	0.93	0.17
cg05932408	PTGIS	Pure Island	Within	0.23	0.2	0.08	0.06	0.07	0.07	0.06	0.08	0.07	0.05	0.2	0.57	0.89	0.4	0.41	0.87	0.37	0.4	0.82	0.54	0.77	0.8	0.6	0.03	0.93	0.92	0.03	0.05	0.06	0.17	0.08	0.93	0.06	0.88	0.93	0.92	0.87	0.59	0.92	0.92	0.71	0.06	0.8	0.8	0.91	0.47
cg05937453	SFRP5	Pure Island	Within	0.09	0.07	0.06	0.04	0.05	0.04	0.04	0.04	0.05	0.03	0.03	0.56	0.07	0.39	0.09	0.9	0.12	0.75	0.08	0.09	0.86	0.91	0.16	0.03	0.08	0.96	0.05	0.2	0.04	0.43	0.07	0.86	0.06	0.05	0.87	0.41	0.91	0.37	0.96	0.49	0.97	0.04	0.14	0.85	0.93	0.86
cg05938285	PIGZ	Pure Island	Within	0.09	0.07	0.05	0.04	0.04	0.04	0.03	0.05	0.04	0.02	0.04	0.05	0.06	0.04	0.08	0.06	0.1	0.04	0.06	0.08	0.07	0.05	0.03	0.03	0.03	0.03	0.03	0.03	0.03	0.03	0.03	0.05	0.04	0.03	0.08	0.05	0.08	0.04	0.05	0.05	0.04	0.04	0.03	0.08	0.06	0.04
cg05938725	NUAK2	Pure Island	Within	0.09	0.09	0.05	0.03	0.05	0.03	0.03	0.03	0.03	0.03	0.03	0.05	0.83	0.04	0.14	0.06	0.09	0.07	0.09	0.12	0.13	0.43	0.02	0.02	0.03	0.03	0.02	0.03	0.03	0.02	0.03	0.03	0.02	0.03	0.02	0.03	0.05	0.04	0.03	0.03	0.04	0.03	0.02	0.07	0.05	0.03
cg05953394	PRKAG2	Pure Island	Within	0.11	0.11	0.05	0.04	0.1	0.09	0.08	0.06	0.07	0.05	0.05	0.19	0.07	0.07	0.1	0.07	0.08	0.09	0.16	0.09	0.09	0.05	0.04	0.02	0.03	0.05	0.05	0.02	0.03	0.02	0.04	0.03	0.05	0.05	0.06	0.04	0.06	0.04	0.07	0.07	0.05	0.11	0.07	0.1	0.12	0.07
cg06011292	MYH10	Pure Island	Within	0.12	0.14	0.05	0.16	0.05	0.06	0.05	0.04	0.05	0.1	0.04	0.06	0.09	0.04	0.13	0.07	0.08	0.09	0.1	0.1	0.88	0.88	0.03	0.03	0.02	0.04	0.06	0.03	0.03	0.03	0.04	0.03	0.07	0.04	0.94	0.11	0.06	0.05	0.07	0.92	0.04	0.07	0.05	0.09	0.07	0.04
cg06043042	NEUROG3	Pure Island	Within	0.04	0.11	0.11	0.04	0.05	0.06	0.04	0.07	0.04	0.01	0.09	0.07	0.05	0.13	0.13	0.09	0.08	0.16	0.55	0.14	0.47	0.9	0.32	0.07	0.32	0.06	0.06	0.57	0.11	0.08	0.12	0.1	0.53	0.2	0.07	0.28	0.09	0.57	0.53	0.47	0.92	0.07	0.34	0.89	0.83	0.73
cg06043114	TSPAN2	Pure Island	Within	0.08	0.12	0.05	0.03	0.06	0.07	0.06	0.05	0.07	0.1	0.06	0.95	0.61	0.07	0.2	0.42	0.11	0.9	0.11	0.16	0.1	NA	0.14	0.03	0.02	0.32	0.02	0.02	0.02	0.03	0.03	0.03	0.11	0.02	0.06	0.04	0.38	0.06	0.8	0.04	0.74	0.9	0.03	0.66	0.2	0.03
cg06048156	ITGB3	Pure Island	Within	0.08	0.08	0.04	0.03	0.05	0.04	0.02	0.05	0.03	0.03	0.05	0.04	0.04	0.04	0.15	0.59	0.1	0.07	0.22	0.13	0.84	0.9	0.02	0.02	0.02	0.47	0.03	0.02	0.03	0.02	0.03	0.03	0.02	0.03	0.96	0.24	0.79	0.04	0.3	0.16	0.04	0.06	0.03	0.89	0.09	0.03
cg06071083	SLC12A4	Pure Island	Within	0.07	0.07	0.04	0.03	0.02	0.02	0.03	0.03	0.03	0.02	0.02	0.04	0.03	0.03	0.07	0.56	0.09	0.05	0.07	0.07	0.08	0.07	0.02	0.03	0.02	0.97	0.03	0.02	0.23	0.02	0.02	0.02	0.05	0.08	0.04	0.03	0.06	0.02	0.03	0.04	0.02	0.04	0.02	0.13	0.07	0.02
cg06093279	MTUS1	Pure Island	Within	0.12	0.13	0.07	0.08	0.06	0.07	0.05	0.06	0.06	0.07	0.05	0.08	0.13	0.06	0.13	0.1	0.12	0.1	0.11	0.19	0.18	0.87	0.07	0.05	0.06	0.05	0.07	0.05	0.06	0.05	0.06	0.08	0.23	0.07	0.07	0.07	0.09	0.08	0.06	0.07	0.11	0.1	0.06	0.15	0.13	0.07
cg06139836	EBF3	Pure Island	Within	0.09	0.08	0.06	0.07	0.06	0.04	0.06	0.07	0.06	0.04	0.14	0.1	0.23	0.66	0.35	0.52	0.23	0.09	0.29	0.77	0.87	0.82	0.12	0.12	0.14	0.45	0.05	0.18	0.05	0.08	0.37	0.28	0.11	0.05	0.82	0.07	0.73	0.12	0.83	0.84	0.31	0.05	0.77	0.36	0.56	0.7
cg06161738	AC006017.2-1	Pure Island	Within	0.06	0.08	0.04	0.01	0.05	0.03	0.03	0.03	0.03	0.02	0.02	0.05	0.03	0.02	0.06	0.03	0.04	0.04	0.07	0.04	0.05	0.03	0.01	0.01	0.01	0.02	0.03	0.01	0.02	0.01	0.02	0.01	0.02	0.02	0.02	0.02	0.04	0.02	0.02	0.03	0.02	0.04	0.02	0.03	0.04	0.02
cg06179485	TMEM54	Pure Island	Within	0.16	0.16	0.16	0.06	0.1	0.09	0.1	0.09	0.06	0.03	0.13	0.09	0.77	0.16	0.73	0.24	0.38	0.1	0.64	0.47	0.31	0.41	0.07	0.42	0.06	0.05	0.07	0.06	0.55	0.12	0.27	0.47	0.33	0.2	0.4	0.55	0.12	0.1	0.25	0.16	0.42	0.06	0.09	0.34	0.12	0.08
cg06187947	GULP1	Pure Island	Within	0.11	0.08	0.06	0.03	0.04	0.03	0.03	0.04	0.03	0.02	0.03	0.5	0.91	0.04	0.13	0.11	0.78	0.07	0.1	0.18	0.35	0.12	0.03	0.03	0.03	0.23	0.02	0.03	0.03	0.03	0.03	0.03	0.02	0.05	0.03	0.03	0.35	0.03	0.03	0.04	0.04	0.05	0.04	0.07	0.06	0.24
cg06200013	ATP1B2	Pure Island	Within	0.1	0.17	0.04	0.15	0.04	0.03	0.03	0.04	0.03	0.04	0.03	0.05	0.06	0.17	0.11	0.48	0.11	0.08	0.32	0.15	0.69	NA	0.02	0.01	0.01	0.08	0.03	0.01	0.02	0.01	0.02	0.02	0.07	0.02	0.2	0.15	0.29	0.14	NA	0.09	0.29	0.03	0.05	0.77	0.5	0.09
cg06201642	ST6GALNAC5	Pure Island	Within	0.08	0.08	0.05	0.07	0.05	0.06	0.04	0.05	0.05	0.07	0.07	0.05	0.32	0.35	0.32	0.07	0.08	0.07	0.81	0.82	0.81	0.86	0.05	0.04	0.05	0.05	0.03	0.21	0.04	0.04	0.08	0.07	0.13	0.83	0.88	0.91	0.83	0.88	0.86	0.86	0.9	0.8	0.82	0.76	0.84	0.22
cg06222851	OGDHL	Pure Island	Within	0.08	0.13	0.08	0.03	0.05	0.05	0.04	0.04	0.04	0.03	0.05	0.05	0.05	0.06	0.09	0.07	0.1	0.06	0.11	0.09	0.95	0.95	0.03	0.02	0.04	0.04	0.04	0.03	0.03	0.03	0.04	0.04	0.03	0.03	0.98	0.08	0.62	0.05	0.21	0.09	0.04	0.05	0.04	0.15	0.07	0.04
cg06230736	GATA3	Pure Island	Within	0.07	0.22	0.21	0.05	0.04	0.04	0.03	0.03	0.04	0.04	0.18	0.91	0.65	0.04	0.72	0.05	0.05	0.04	0.35	0.53	0.87	0.82	0.19	0.86	0.03	0.03	0.04	0.02	0.04	0.03	0.08	0.08	0.58	0.24	0.95	0.94	0.61	0.03	0.86	0.09	0.92	0.05	0.03	0.87	0.92	0.04
cg06243556	ZSCAN18	Pure Island	Within	0.09	0.13	0.07	0.05	0.05	0.07	0.06	0.06	0.05	0.11	0.07	0.09	0.11	0.34	0.36	0.28	0.07	0.06	0.77	0.66	0.8	0.89	0.03	0.03	0.45	0.9	0.06	0.19	0.29	0.03	0.28	0.1	0.04	0.04	0.94	0.83	0.81	0.92	0.93	0.44	0.33	0.91	0.53	0.86	0.07	0.36
cg06250108	TMEM169	Pure Island	Within	0.05	0.06	0.06	0.07	0.05	0.05	0.05	0.05	0.05	0.06	0.06	0.04	0.13	0.06	0.07	0.08	0.07	0.06	0.08	0.1	0.08	0.07	0.02	0.02	0.03	0.04	0.03	0.02	0.02	0.02	0.04	0.03	0.03	0.04	0.05	0.06	0.05	0.04	0.05	0.05	0.06	0.05	0.03	0.08	0.09	0.04
cg06277481	KANK3	Pure Island	Within	0.04	0.04	0.03	0.04	0.04	0.04	0.03	0.04	0.03	0.03	0.03	0.03	0.03	0.03	0.07	0.03	0.04	0.03	0.05	0.05	0.04	0.04	0.01	0.02	0.02	0.03	0.02	0.02	0.01	0.01	0.02	0.02	0.01	0.02	0.02	0.02	0.05	0.02	0.04	0.02	0.97	0.04	0.02	0.06	0.08	0.03
cg06291867	HTR7	Pure Island	Within	0.11	0.12	0.11	0.04	0.05	0.05	0.08	0.13	0.04	0.02	0.04	0.95	0.71	0.09	0.07	0.68	0.75	0.94	0.94	0.87	0.94	0.94	0.51	0.53	0.89	0.64	0.79	0.65	0.1	0.32	0.13	0.61	0.55	0.46	0.97	0.98	0.95	0.97	0.98	0.96	0.97	0.5	0.9	0.09	0.97	0.34
cg06295856	CALCA	Pure Island	Within	0.09	0.03	0.04	0.06	0.06	0.04	0.04	0.05	0.03	0.04	0.1	0.88	0.98	0.75	0.34	0.88	0.73	0.05	0.55	0.51	0.95	0.77	0.34	0.64	0.64	0.95	0.81	0.65	0.97	0.15	0.11	0.95	0.02	0.23	0.92	0.9	0.8	0.9	0.33	0.9	0.95	0.09	0.75	0.93	0.66	0.17
cg06334284	PPAP2B	Associated Island	Within	0.04	0.05	0.03	0.02	0.03	0.03	0.03	0.03	0.02	0.02	0.02	0.03	0.03	0.02	0.05	0.04	0.05	0.03	0.09	0.05	0.05	0.12	0.02	0.04	0.02	0.02	0.02	0.02	0.02	0.01	0.02	0.02	0.02	0.02	0.02	0.02	0.04	0.03	0.02	0.16	0.02	0.03	0.02	0.07	0.04	0.02
cg06336792	CREM	Pure Island	Within	0.08	0.09	0.05	0.04	0.03	0.03	0.03	0.05	0.08	0.02	0.03	0.04	0.04	0.03	0.11	0.05	0.08	0.05	0.09	0.1	0.06	0.08	0.02	0.97	0.02	0.03	0.02	0.02	0.02	0.02	0.03	0.02	0.02	0.02	0.02	0.02	0.04	0.02	0.02	0.03	0.02	0.02	0.03	0.05	0.05	0.03
cg06353318	OTOP2	Pure Island	Within	0.12	0.12	0.09	0.1	0.12	0.1	0.11	0.12	0.1	0.1	0.05	0.26	0.06	0.25	0.11	0.9	0.57	0.09	0.91	0.76	0.94	0.9	0.15	0.07	0.96	0.96	0.17	0.82	0.75	0.05	0.1	0.88	0.09	0.05	0.96	0.93	0.93	0.95	0.9	0.97	0.95	0.07	0.92	0.93	0.66	0.67
cg06361108	CCNF	Pure Island	Within	0.02	0.02	0.02	0.02	0.03	0.03	0.02	0.03	0.03	0.01	0.03	0.02	0.03	0.4	0.03	0.02	0.17	0.02	0.04	0.03	0.02	0.73	0.01	0.01	0.01	0.02	0.01	0.01	0.02	0.03	0.02	0.78	0.01	0.02	0.02	0.02	0.02	0.01	0.97	0.06	0.02	0.01	0.01	0.03	0.04	0.01
cg06377278	RUNX3	Pure Island	Within	0.03	0.03	0.02	0.01	0.03	0.04	0.02	0.03	0.05	0.01	0.05	0.98	0.01	0.55	0.6	0.94	0.04	0.96	0.04	0.03	0.96	0.98	0.13	0.01	0.01	0.98	0.02	0.01	0.01	0.99	0.17	0.98	0.02	0.01	0.99	0.99	0.95	0.76	0.99	0.94	0.99	0.13	0.99	0.03	0.96	0.32
cg06384463	BARHL2	Pure Island	Within	0.04	0.05	0.06	0.13	0.06	0.04	0.03	0.05	0.04	0.05	0.06	0.16	0.36	0.32	0.12	0.66	0.34	0.07	0.8	NA	NA	NA	0.07	0.87	0.42	0.69	0.22	0.05	0.38	0.68	0.38	0.61	0.91	0.02	0.58	0.19	0.8	0.57	0.47	0.88	0.84	0.24	0.59	0.63	0.38	0.23
cg06386517	GRB10	Pure Island	Within	0.13	0.14	0.05	0.02	0.02	0.03	0.03	0.03	0.02	0.01	0.02	0.47	0.89	0.02	0.13	0.08	0.09	0.07	0.1	0.14	0.14	0.13	0.06	0.01	0.02	0.02	0.02	0.38	0.02	0.02	0.02	0.02	0.02	0.02	0.02	0.01	0.03	0.02	0.01	0.02	0.07	0.02	0.01	0.04	0.06	0.02
cg06391468	SOX9	Pure Island	Within	0.09	0.09	0.06	0.04	0.04	0.05	0.03	0.04	0.04	0.04	0.03	0.05	0.92	0.04	0.08	0.28	0.07	0.07	0.1	0.13	0.12	0.94	0.13	0.03	0.04	0.49	0.04	0.03	0.03	0.04	0.05	0.05	0.03	0.04	0.06	0.06	0.06	0.24	0.05	0.07	0.42	0.07	0.05	0.06	0.47	0.04
cg06397837	HOXA13	Pure Island	Within	0.05	0.04	0.04	0.08	0.1	0.09	0.06	0.08	0.05	0.09	0.06	0.26	0.38	0.76	0.1	0.71	0.45	0.93	0.06	0.07	0.33	0.1	0.14	0.02	0.02	0.44	0.36	0.02	0.02	0.08	0.02	0.34	0.26	0.04	0.29	0.05	0.09	0.06	0.05	0.04	0.39	0.09	0.03	0.07	0.32	0.03
cg06423920	FEZF2	Pure Island	Within	0.1	0.1	0.06	0.05	0.06	0.04	0.05	0.05	0.04	0.06	0.03	0.37	0.91	0.15	0.1	0.58	0.38	0.08	0.82	0.46	0.38	0.84	0.24	0.92	0.04	0.79	0.05	0.27	0.22	0.05	0.11	0.32	0.11	0.34	0.65	0.35	0.46	0.8	0.88	0.88	0.88	0.07	0.12	0.7	0.66	0.79
cg06440646	SMAD1	Pure Island	Within	0.12	0.11	0.07	0.05	0.05	0.05	0.05	0.04	0.05	0.04	0.04	0.06	0.07	0.04	0.12	0.06	0.1	0.08	0.13	0.14	0.15	0.09	0.03	0.03	0.04	0.03	0.05	0.03	0.03	0.03	0.03	0.04	0.03	0.03	0.03	0.03	0.05	0.05	0.05	0.06	0.05	0.06	0.03	0.09	0.05	0.04
cg06465926	PPP2R3A	Pure Island	Within	0.07	0.05	0.03	0.05	0.08	0.08	0.09	0.09	0.08	0.03	0.05	0.05	0.04	0.06	0.06	0.08	0.08	0.07	0.1	0.08	0.41	0.06	0.03	0.04	0.04	0.07	0.03	0.03	0.04	0.04	0.06	0.04	0.03	0.03	0.03	0.04	0.06	0.03	0.04	0.04	0.05	0.05	0.04	0.1	0.11	0.08
cg06479426	RP11-93B14.6	Pure Island	Within	0.06	0.08	0.05	0.04	0.04	0.04	0.04	0.05	0.05	0.04	0.04	0.06	0.04	0.03	0.06	0.06	0.07	0.04	0.07	0.06	0.07	0.07	0.03	0.02	0.03	0.03	0.02	0.03	0.03	0.02	0.03	0.03	0.24	0.03	0.03	0.04	0.05	0.04	0.03	0.05	0.03	0.04	0.03	0.07	0.86	0.05
cg06484397	GLIPR2	Pure Island	Within	0.06	0.05	0.05	0.05	0.04	0.04	0.04	0.04	0.04	0.04	0.06	0.06	0.06	0.11	0.29	0.11	0.08	0.06	0.25	0.13	0.35	0.94	0.39	0.26	0.25	0.1	0.56	0.08	0.05	0.06	0.17	0.38	0.09	0.09	0.09	0.14	0.16	0.16	0.75	0.19	0.08	0.24	0.1	0.75	0.15	0.04
cg06487986	PER3	Pure Island	Within	0.09	0.11	0.06	0.03	0.03	0.03	0.03	0.04	0.03	0.01	0.04	0.06	0.04	0.04	0.2	0.05	0.08	0.07	0.12	0.13	0.12	0.09	0.02	0.02	0.03	0.03	0.02	0.02	0.02	0.02	0.03	0.02	0.04	0.02	0.03	0.02	0.05	0.02	0.04	0.05	0.04	0.04	0.02	0.18	0.04	0.02
cg06489804	FBXW9	Pure Island	Within	0.06	0.05	0.06	0.03	0.03	0.04	0.04	0.04	0.03	0.04	0.04	0.05	0.04	0.04	0.07	0.07	0.08	0.05	0.09	0.06	0.08	0.11	0.03	0.03	0.04	0.04	0.03	0.03	0.03	0.03	0.04	0.98	0.03	0.03	0.05	0.08	0.08	0.09	0.03	0.05	0.05	0.05	0.09	0.06	0.05	0.03
cg06497752	COL9A3	Pure Island	Within	0.04	0.04	0.03	0.02	0.03	0.03	0.02	0.03	0.05	0.01	0.02	0.96	0.07	0.19	0.35	0.95	0.34	0.3	0.05	0.03	0.94	0.95	0.38	0.07	0.96	0.98	0.02	0.28	0.02	0.13	0.03	0.96	0.01	0.06	0.18	0.77	0.04	0.55	0.47	0.22	0.98	0.05	0.34	0.36	0.87	0.2
cg06508445	LOX	Pure Island	Within	0.12	0.16	0.06	0.03	0.03	0.04	0.03	0.04	0.04	0.06	0.03	0.09	0.05	0.03	0.17	0.07	0.1	0.07	0.15	0.14	0.92	0.93	0.63	0.03	0.58	0.04	0.03	0.07	0.03	0.55	0.03	0.03	0.94	0.33	0.73	0.31	0.08	0.03	0.08	0.4	0.53	0.06	0.04	0.91	0.06	0.03
cg06508934	TIMP2	Pure Island	Within	0.07	0.07	0.04	0.04	0.03	0.04	0.03	0.03	0.03	0.04	0.02	0.04	0.03	0.02	0.09	0.04	0.08	0.04	0.08	0.05	0.06	NA	0.02	0.02	0.02	0.03	0.03	0.01	0.01	0.01	0.02	0.01	0.02	0.02	0.02	0.03	0.04	0.02	0.02	0.03	0.02	0.04	0.05	0.05	0.05	0.03
cg06509239	OSR1	Pure Island	Within	0.06	0.2	0.17	0.03	0.03	0.07	0.1	0.05	0.03	0.02	0.22	0.56	0.55	0.42	0.45	0.85	0.78	0.83	0.58	0.11	0.8	0.82	0.45	0.16	0.04	0.83	0.35	0.39	0.37	0.4	0.25	0.31	0.3	0.07	0.08	0.45	0.15	0.48	0.49	0.4	0.04	0.05	0.38	0.52	0.05	0.61
cg06533629	KLF14	Pure Island	Within	0.17	NA	0.18	NA	0.15	0.18	0.16	0.17	0.18	0.17	0.2	0.39	0.1	0.96	0.45	0.69	0.12	0.8	0.14	0.09	0.62	0.97	0.13	0.03	0.37	0.05	0.18	0.05	0.23	0.33	0.05	0.2	NA	0.07	0.92	0.16	0.15	0.36	0.15	0.17	0.17	0.17	0.77	0.04	0.58	0.07
cg06552037	OBSL1	Pure Island	Within	0.06	0.06	0.03	0.02	0.03	0.03	0.02	0.02	0.02	0.01	0.02	0.04	0.06	0.02	0.09	0.05	0.04	0.04	0.06	0.05	0.05	0.05	0.02	0.02	0.02	0.03	0.02	0.02	0.02	0.02	0.02	0.02	0.02	0.05	0.42	0.48	0.39	0.41	0.96	0.45	0.02	0.03	0.02	0.83	0.04	0.02
cg06557358	TMEM132E	Pure Island	Within	0.08	0.06	0.04	0.02	0.02	0.03	0.02	0.02	0.02	0.01	0.02	0.04	0.89	0.2	0.1	0.06	0.08	0.05	0.34	0.27	0.88	0.88	0.17	0.02	0.07	0.04	0.02	0.19	0.02	0.02	0.04	0.39	0.24	0.24	0.72	0.83	0.79	0.64	0.94	0.94	0.23	0.05	0.48	0.86	0.68	0.45
cg06607866	AIP	Pure Island	Within	0.16	0.11	0.1	0.08	0.05	0.03	0.04	0.07	0.04	0.05	0.11	0.13	0.11	0.13	0.2	0.09	0.08	0.09	0.62	0.35	0.14	0.19	0.2	0.04	0.12	0.15	0.03	0.31	0.3	0.06	0.16	0.09	0.08	0.1	0.08	0.08	0.48	0.04	0.14	0.95	0.28	0.15	0.47	0.19	0.46	0.05
cg06625414	SLC4A3	Pure Island	Within	0.06	0.06	0.06	0.05	0.03	0.02	0.02	0.02	0.02	0.01	0.05	0.03	0.85	0.02	0.17	0.05	0.06	0.04	0.07	0.06	0.06	0.06	0.02	0.02	0.02	0.03	0.02	0.02	0.02	0.02	0.03	0.04	0.02	0.03	0.02	0.03	0.2	0.03	0.02	0.15	0.04	0.03	0.02	0.06	0.3	0.03
cg06626655	RSPO1	Pure Island	Within	0.07	0.04	0.04	0.14	0.05	0.06	0.05	0.06	0.06	0.05	0.03	0.15	0.87	0.05	0.06	0.7	0.3	0.04	0.34	0.07	0.38	0.36	0.11	0.03	0.12	0.64	0.66	0.35	0.27	0.04	0.08	0.09	0.14	0.11	0.86	0.06	0.18	0.78	0.1	0.11	0.87	0.08	0.17	0.5	0.24	0.08
cg06637893	C16orf86	Pure Island	Within	0.1	0.09	0.05	0.06	0.04	0.04	0.02	0.02	0.03	0.02	0.11	0.21	0.03	0.77	0.27	0.53	0.39	0.06	0.76	0.13	0.9	0.92	0.14	0.05	0.64	0.4	0.22	0.72	0.28	0.66	0.02	0.57	0.02	0.27	0.03	0.85	0.3	0.56	0.96	0.91	0.93	0.04	0.83	0.82	0.88	0.03
cg06690633	RAB15	Pure Island	Within	0.06	0.06	0.08	0.03	0.05	0.06	0.07	0.07	0.06	0.05	0.09	0.06	0.08	0.12	0.1	0.07	0.09	0.07	0.1	0.08	0.08	0.09	0.09	0.06	0.06	0.05	0.04	0.07	0.05	0.06	0.05	0.1	0.03	0.06	0.05	0.08	0.1	0.09	0.05	0.09	0.16	0.09	0.09	0.37	0.12	0.06
cg06717231	ZNF559	Pure Island	Within	0.14	0.1	0.04	0.03	0.02	0.03	0.02	0.03	0.03	0.04	0.02	0.36	0.04	0.04	0.18	0.38	0.11	0.06	0.09	0.12	0.31	0.29	0.02	0.01	0.02	0.93	0.02	0.02	0.04	0.02	0.02	0.01	0.03	0.02	0.16	0.35	0.22	0.82	0.25	0.02	0.03	0.03	0.03	0.05	0.03	0.03
cg06720956	ONECUT1	Pure Island	Within	0.05	0.07	0.08	0.1	0.05	0.06	0.06	0.06	0.05	0.07	0.04	0.37	0.07	0.55	0.14	0.05	0.54	0.08	0.63	0.14	0.87	0.91	0.03	0.03	0.03	0.03	0.04	0.21	0.02	0.03	0.05	0.08	0.06	0.03	0.92	0.92	0.87	0.09	0.9	0.63	0.53	0.04	0.06	0.78	0.37	0.1
cg06722216	NOL4	Pure Island	Within	0.05	0.06	0.03	0.09	0.04	0.03	0.04	0.04	0.04	0.04	0.03	0.03	0.97	0.12	0.38	0.06	0.55	0.4	0.86	0.84	0.73	0.87	0.11	0.01	0.43	0.03	0.05	0.31	0.02	0.01	0.02	0.05	0.01	0.03	0.9	0.56	0.87	0.78	0.82	0.93	0.96	0.03	0.79	0.82	0.41	0.61
cg06722633	GRIK3	Pure Island	Within	0.06	0.06	0.06	0.2	0.06	0.05	0.05	0.04	0.05	0.05	0.19	0.06	0.97	0.65	0.09	0.8	0.86	0.05	0.94	0.96	0.95	0.93	0.3	0.02	0.97	0.93	0.9	0.44	0.02	0.91	0.66	0.93	0.47	0.81	0.82	0.86	0.63	0.91	0.97	0.96	0.97	0.89	0.92	0.8	0.85	0.5
cg06722792	PDE9A	Pure Island	Within	0.06	0.08	0.06	0.04	0.05	0.06	0.05	0.05	0.06	0.04	0.04	0.06	0.06	0.08	0.23	0.07	0.08	0.07	0.13	0.1	0.13	0.9	0.05	0.04	0.03	0.07	0.03	0.05	0.05	0.04	0.07	0.2	0.06	0.06	0.16	0.05	0.08	0.07	0.18	0.21	0.07	0.06	0.14	0.09	0.13	0.04
cg06726207	SIX4	Associated Island	Within	0.13	0.11	0.08	0.04	0.05	0.06	0.05	0.06	0.05	0.04	0.04	0.07	0.07	0.06	0.14	0.09	0.12	0.1	0.15	0.15	0.91	0.12	0.05	0.04	0.05	0.05	0.05	0.04	0.05	0.05	0.05	0.05	0.03	0.04	0.5	0.45	0.36	0.05	0.92	0.06	0.06	0.06	0.06	0.09	0.1	0.06
cg06734962	CEBPD	Pure Island	Within	0.1	0.07	0.05	0.03	0.03	0.03	0.03	0.03	0.03	0.01	0.04	0.05	0.04	0.05	0.11	0.06	0.09	0.06	0.08	0.09	0.07	0.08	0.03	0.03	0.03	0.03	0.02	0.02	0.02	0.02	0.03	0.03	0.02	0.07	0.03	0.04	0.05	0.06	0.03	0.03	0.03	0.05	0.04	0.04	0.06	0.03
cg06744574	BEND5	Pure Island	Within	0.09	0.1	0.05	0.03	0.02	0.03	0.03	0.03	0.02	0.02	0.05	0.04	0.3	0.66	0.43	0.72	0.63	0.05	0.89	0.84	0.81	0.89	0.67	0.02	0.71	0.96	0.12	0.65	0.03	0.05	0.37	0.96	0.04	0.58	0.97	0.97	0.94	0.97	0.98	0.84	0.98	0.03	0.08	0.92	0.5	0.04
cg06746101	TMED3	Pure Island	Within	0.07	0.09	0.04	0.02	0.03	0.03	0.03	0.03	0.03	0.02	0.03	0.04	0.04	0.03	0.1	0.05	0.07	0.06	0.81	0.65	0.1	0.09	0.02	0.02	0.02	0.03	0.03	0.02	0.02	0.02	0.03	0.03	0.01	0.03	0.02	0.03	0.04	0.02	0.02	0.44	0.03	0.02	0.02	0.06	0.08	0.02
cg06752594	PSRC1	Pure Island	Within	0.05	0.04	0.03	0.03	0.02	0.03	0.02	0.02	0.02	0.02	0.02	0.03	0.02	0.02	0.05	0.03	0.04	0.03	0.06	0.04	0.03	0.03	0.01	0.02	0.02	0.02	0.01	0.02	0.02	0.01	0.02	0.02	0.02	0.02	0.02	0.02	0.04	0.02	0.02	0.02	0.02	0.02	0.03	0.03	0.06	0.02
cg06763078	KCNC1	Pure Island	Within	0.05	0.04	0.04	0.06	0.05	0.04	0.04	0.06	0.04	0.02	0.05	0.03	0.04	0.21	0.08	0.05	0.05	0.03	0.11	0.05	0.97	0.97	0.03	0.01	0.02	0.02	0.06	0.11	0.02	0.02	0.04	0.02	0.01	0.02	0.88	0.88	0.75	0.05	0.64	0.1	0.04	0.03	0.04	0.67	0.65	0.03
cg06765514	PIP5KL1	Pure Island	Within	0.09	0.11	0.06	0.21	0.08	0.08	0.08	0.09	0.07	0.09	0.04	0.65	0.11	0.04	0.65	0.22	0.13	0.19	0.09	0.22	0.18	0.19	0.11	0.06	0.65	0.05	0.11	0.2	0.06	0.38	0.05	0.56	0.15	0.24	0.04	0.32	0.1	0.73	0.06	0.06	0.93	0.27	0.06	0.16	0.09	0.65
cg06782692	STK32C	Pure Island	Within	0.09	0.11	0.09	0.06	0.11	0.08	0.09	0.09	0.09	0.09	0.05	0.16	0.06	0.05	0.09	0.13	0.13	0.1	0.12	0.1	0.83	0.8	0.03	0.05	0.04	0.04	0.07	0.03	0.05	0.03	0.04	0.04	0.05	0.04	0.04	0.03	0.07	0.05	0.41	0.04	0.04	0.06	0.06	0.07	0.12	0.05
cg06790324	GRB10	Pure Island	Within	0.08	0.05	0.03	0.02	0.03	0.03	0.04	0.04	0.04	0.01	0.04	0.44	0.98	0.03	0.05	0.04	0.06	0.04	0.08	0.05	0.06	0.05	0.26	0.01	0.01	0.03	0.02	0.33	0.01	0.02	0.02	0.02	0.12	0.02	0.02	0.02	0.03	0.02	0.01	0.01	0.43	0.02	0.01	0.05	0.05	0.03
cg06807989	C3orf52	Pure Island	Within	0.07	0.08	0.07	0.05	0.07	0.05	0.06	0.06	0.05	0.04	0.05	0.7	0.63	0.07	0.07	0.08	0.08	0.07	0.09	0.08	0.04	0.22	0.05	0.07	0.05	0.06	0.03	0.04	0.05	0.06	0.05	0.06	0.03	0.3	0.05	0.06	0.08	0.05	0.04	0.06	0.05	0.06	0.05	0.08	0.07	0.05
cg06812033	NKD1	Pure Island	Within	0.06	0.07	0.05	0.03	0.08	0.09	0.08	0.09	0.08	0.03	0.06	0.04	0.04	0.07	0.1	0.07	0.07	0.06	0.08	0.04	0.59	0.04	0.53	0.03	0.03	0.05	0.04	0.03	0.02	0.03	0.06	0.04	0.05	0.03	0.03	0.04	0.15	0.04	0.02	0.06	0.04	0.05	0.04	0.14	0.12	0.07
cg06817917	BMPR1A	Pure Island	Within	0.09	0.07	0.05	0.04	0.05	0.05	0.05	0.05	0.05	0.06	0.04	0.07	0.38	0.06	0.08	0.07	0.08	0.07	0.08	0.08	0.08	0.09	0.04	0.04	0.04	0.05	0.05	0.03	0.04	0.04	0.05	0.05	0.03	0.05	0.07	0.07	0.08	0.07	0.05	0.06	0.05	0.12	0.06	0.07	0.08	0.05
cg06819200	ECE1	Pure Island	Within	0.02	0.02	0.01	0.01	0.01	0.02	0.01	0.02	0.01	0.01	0.01	0.01	0.01	0.01	0.02	0.64	0.07	0.01	0.02	0.02	0.01	0.01	0.02	0.01	0.01	0.98	0.01	0.06	0.01	0	0.01	0.13	0.02	0.99	0.01	0.99	0.02	0.01	0.01	0.01	0.01	0.01	0.01	0.04	0.03	0.01
cg06825142	DRD4	Pure Island	Within	0.09	0.08	0.06	0.03	0.03	0.04	0.03	0.04	0.04	0.03	0.15	0.93	0.95	0.73	0.95	0.92	0.86	0.92	0.88	0.94	0.93	0.92	0.84	0.96	0.95	0.95	0.83	0.81	0.94	0.87	0.26	0.95	0.92	0.91	0.94	0.95	0.9	0.94	0.94	0.94	0.94	0.77	0.96	0.91	0.93	0.93
cg06831658	SOCS2	Pure Island	Within	0.08	0.07	0.08	0.04	0.06	0.06	0.07	0.07	0.06	0.03	0.04	0.94	0.08	0.05	0.1	0.04	0.09	0.06	0.07	0.08	0.08	0.08	0.03	0.02	0.03	0.04	0.03	0.03	0.03	0.03	0.03	0.04	0.05	0.03	0.05	0.03	0.05	0.03	0.04	0.04	0.04	0.08	0.03	0.06	0.07	0.04
cg06840226	GPC1	Pure Island	Within	0.09	0.08	0.04	0.02	0.02	0.03	0.02	0.02	0.02	0.01	0.01	0.04	0.92	0.03	0.09	0.07	0.04	0.05	0.1	0.07	0.09	0.05	0.02	0.02	0.02	0.03	0.02	0.02	0.02	0.02	0.02	0.02	0.02	0.02	0.02	0.02	0.06	0.02	0.02	0.02	0.03	0.03	0.02	0.06	0.04	0.02
cg06856528	TMEFF2	Pure Island	Within	0.05	0.1	0.11	0.02	0.04	0.05	0.04	0.09	0.04	0.02	0.15	0.88	0.07	0.27	0.67	0.78	0.79	0.78	0.84	0.85	0.88	0.85	0.32	0.03	0.5	0.88	0.03	0.18	0.03	0.06	0.07	0.24	0.02	0.89	0.9	0.9	0.91	0.87	0.91	0.56	0.51	0.31	0.67	0.86	0.89	0.63
cg06866657	LHX6	Pure Island	Within	0.08	0.08	0.06	0.05	0.05	0.06	0.07	0.08	0.23	0.02	0.05	0.42	0.05	0.24	0.24	0.17	0.08	0.06	0.12	0.09	0.82	0.81	0.08	0.05	0.06	0.08	0.03	0.19	0.06	0.11	0.09	0.08	0.05	0.48	0.83	0.05	0.39	0.08	0.82	0.53	0.36	0.05	0.78	0.31	0.08	0.16
cg06885524	CYBRD1	Pure Island	Within	0.04	0.05	0.05	0.02	0.02	0.02	0.02	0.03	0.02	0.01	0.04	0.03	0.03	0.05	0.12	0.3	0.05	0.03	0.08	0.05	0.89	0.72	0.24	0.02	0.02	0.52	0.03	0.22	0.02	0.02	0.02	0.02	0.99	0.14	0.29	0.42	0.03	0.04	0.02	0.15	0.05	0.02	0.02	0.06	0.04	0.02
cg06905514	CAMK2B	Pure Island	Within	0.12	0.14	0.06	0.02	0.03	0.03	0.03	0.02	0.02	0.01	0.03	0.04	0.08	0.23	0.14	0.06	0.6	0.08	0.58	0.47	0.96	0.96	0.41	0.02	0.02	0.03	0.02	0.44	0.02	0.02	0.03	0.36	0.01	0.02	0.98	0.67	0.94	0.91	0.98	0.95	0.02	0.03	0.65	0.91	0.3	0.34
cg06912252	C9orf125	Pure Island	Within	0.1	0.09	0.05	0.03	0.02	0.04	0.03	0.04	0.03	0.04	0.04	0.05	0.94	0.04	0.21	0.66	0.62	0.1	0.08	0.08	0.09	0.07	0.37	0.03	0.03	0.88	0.55	0.31	0.03	0.02	0.03	0.03	0.03	0.04	0.04	0.03	0.38	0.34	0.19	0.04	0.51	0.06	0.04	0.07	0.33	0.1
cg06940792	MEGF10	Pure Island	Within	0.06	0.06	0.04	0.07	0.06	0.05	0.04	0.05	0.04	0.06	0.05	0.33	0.94	0.61	0.81	0.88	0.43	0.29	0.44	0.55	0.83	0.85	0.51	0.53	0.9	0.94	0.54	0.58	0.06	0.24	0.13	0.96	0.93	0.12	0.96	0.94	0.91	0.93	0.92	0.94	0.92	0.24	0.93	0.86	0.91	0.86
cg06948294	STXBP6	Pure Island	Within	0.06	0.05	0.04	0.06	0.04	0.05	0.04	0.03	0.03	0.03	0.03	0.9	0.9	0.54	0.78	0.74	0.69	0.57	0.69	0.23	0.8	0.78	0.33	0.02	0.79	0.82	0.85	0.33	0.03	0.2	0.29	0.83	0.77	0.42	0.08	0.7	0.21	0.02	0.74	0.2	0.87	0.08	0.18	0.66	0.62	0.13
cg06954481	GBX2	Pure Island	Within	0.14	0.13	0.07	0.15	0.05	0.04	0.04	0.05	0.07	0.03	0.16	0.96	0.95	0.75	0.16	0.08	0.1	0.16	0.11	0.19	0.83	0.91	0.02	0.04	0.04	0.04	0.07	0.04	0.02	0.03	0.03	0.04	0.06	0.05	0.98	0.92	0.93	0.04	0.88	0.97	0.05	0.09	0.86	0.08	0.87	0.04
cg06963844	FBXO6	Pure Island	Within	0.08	0.07	0.06	0.07	0.05	0.06	0.05	0.06	0.06	0.13	0.05	0.78	0.07	0.04	0.13	0.09	0.09	0.06	0.14	0.11	0.32	0.05	0.04	0.04	0.04	0.05	0.04	0.04	0.03	0.03	0.05	0.05	0.14	0.05	0.05	0.03	0.07	0.04	0.04	0.08	0.05	0.06	0.05	0.17	0.07	0.05
cg06973760	NFATC1	Pure Island	Within	0.05	0.04	0.06	0.09	0.06	0.04	0.05	0.05	0.05	0.04	0.23	0.02	0.12	0.28	0.14	0.06	0.26	0.03	0.05	0.04	0.37	0.04	0.02	0.02	0.07	0.05	0.06	0.05	0.05	0.05	0.06	0.13	0.04	0.03	0.04	0.08	0.07	0.28	0.87	0.06	0.18	0.05	0.54	0.06	0.06	0.04
cg06974755	RALGDS	Pure Island	Within	0.12	0.17	0.18	0.16	0.09	0.11	0.1	0.1	0.12	0.18	0.08	0.29	0.05	0.05	0.91	0.51	0.14	0.05	0.24	0.29	0.12	0.06	0.1	0.18	0.06	0.23	0.16	0.23	0.24	0.08	0.04	0.18	0.11	0.04	0.03	0.85	0.08	0.9	0.91	0.28	0.24	0.07	0.07	0.33	0.17	0.09
cg06980380	DTNB	Pure Island	Within	0.08	0.08	0.05	0.04	0.05	0.05	0.05	0.06	0.05	0.03	0.06	0.37	0.22	0.2	0.16	0.12	0.33	0.06	0.22	0.2	0.79	0.52	0.15	0.91	0.13	0.36	0.04	0.3	0.71	0.11	0.06	0.15	0.85	0.55	0.06	0.68	0.15	0.54	0.47	0.22	0.13	0.05	0.18	0.43	0.56	0.05
cg06990298	RASD1	Pure Island	Within	0.06	0.07	0.06	0.06	0.05	0.04	0.03	0.04	0.04	0.01	0.07	0.91	0.05	0.16	0.86	0.11	0.06	0.78	0.13	0.09	0.16	0.59	0.09	0.02	0.11	0.12	0.1	0.09	0.02	0.05	0.03	0.2	0.03	0.08	0.14	0.15	0.05	0.1	0.12	0.53	0.43	0.04	0.05	0.49	0.04	0.07
cg06992027	TAGLN2	Pure Island	Within	0.06	0.09	0.06	0.04	0.05	0.04	0.05	0.04	0.04	0.06	0.04	0.05	0.05	0.04	0.07	0.05	0.08	0.05	0.1	0.07	0.05	0.06	0.04	0.93	0.03	0.04	0.03	0.03	0.04	0.04	0.04	0.03	0.08	0.03	0.03	0.03	0.06	0.04	0.03	0.04	0.04	0.04	0.04	0.09	0.05	0.03
cg06994747	ADAMTS10	Pure Island	Within	0.1	0.1	0.11	0.07	0.08	0.07	0.07	0.07	0.07	0.06	0.07	0.08	0.07	0.37	0.31	0.1	0.69	0.1	0.11	0.11	0.9	0.9	0.06	0.06	0.08	0.09	0.07	0.06	0.07	0.06	0.17	0.07	0.33	0.07	0.49	0.08	0.53	0.72	0.9	0.37	0.21	0.08	0.86	0.1	0.69	0.06
cg07005513	FADS2	Pure Island	Within	0.06	0.08	0.1	0.08	0.13	0.12	0.12	0.13	0.13	0.12	0.1	0.1	0.11	0.51	0.46	0.75	0.46	0.9	0.91	0.41	0.93	0.95	0.64	0.08	0.1	0.95	0.97	0.49	0.09	0.09	0.12	0.91	0.07	0.28	0.85	0.96	0.92	0.51	0.95	0.74	0.93	0.18	0.9	0.91	0.53	0.11
cg07006526	SMTN	Pure Island	Within	0.04	0.05	0.04	0.02	0.03	0.03	0.02	0.03	0.02	0.03	0.02	0.03	0.03	0.02	0.03	0.05	0.05	0.03	0.05	0.05	0.04	0.03	0.02	0.02	0.02	0.02	0.02	0.02	0.02	0.02	0.02	0.02	0.03	0.01	0.02	0.02	0.04	0.02	0.02	0.03	0.03	0.03	0.02	0.03	0.04	0.02
cg07017374	FLT3	Pure Island	Within	0.1	0.08	0.06	0.17	0.07	0.08	0.08	0.1	0.07	0.11	0.06	0.82	0.09	0.78	0.6	0.54	0.14	0.87	0.9	0.9	0.92	0.96	0.29	0.08	0.54	0.46	0.09	0.26	0.17	0.73	0.72	0.96	0.84	0.04	0.98	0.97	0.86	0.4	0.96	0.96	0.95	0.12	0.97	0.63	0.92	0.61
cg07017477	THEM4	Pure Island	Within	0.06	0.05	0.11	0.04	0.1	0.09	0.09	0.09	0.08	0.04	0.2	0.05	0.98	0.17	0.04	0.16	0.06	0.08	0.11	0.05	0.04	0.12	0.04	0.04	0.05	0.08	0.03	0.03	0.03	0.04	0.08	0.04	0.98	0.07	0.1	0.12	0.08	0.09	0.07	0.09	0.09	0.07	0.07	0.12	0.1	0.09
cg07028533	CNTNAP2	Pure Island	Within	0.08	0.09	0.05	0.05	0.05	0.06	0.06	0.07	0.07	0.06	0.19	0.07	0.04	0.86	0.48	0.26	0.76	0.07	0.61	0.51	0.82	0.82	0.5	0.02	0.84	0.43	0.03	0.3	0.03	0.29	0.14	0.42	0.02	0.05	0.9	0.89	0.78	0.55	0.78	0.92	0.9	0.73	0.75	0.84	0.62	0.07
cg07054095	ZNF549	Pure Island	Within	0.06	0.07	0.03	0.03	0.06	0.04	0.03	0.03	0.06	0.05	0.04	0.03	0.04	0.03	0.04	0.09	0.05	0.04	0.28	0.54	0.84	0.88	0.02	0.17	0.09	0.16	0.02	0.01	0.19	0.02	0.03	0.02	0.06	0.02	0.96	0.45	0.88	0.33	0.91	0.38	0.55	0.93	0.1	0.83	0.05	0.03
cg07075930	PTPRM	Pure Island	Within	0.02	0.02	0.02	0.01	0.04	0.04	0.04	0.04	0.03	0.02	0.04	0.02	0.02	0.03	0.02	0.54	0.33	0.03	0.81	0.59	0.32	0.9	0.16	0.02	0.01	0.52	0.01	0.04	0.01	0.01	0.05	0.01	0.05	0.02	0.54	0.8	0.82	0.02	0.92	0.27	0.68	0.02	0.06	0.86	0.04	0.04
cg07080358	CNRIP1	Pure Island	Within	0.09	0.09	0.05	0.1	0.03	0.04	0.03	0.03	0.03	0.04	0.04	0.04	0.29	0.8	0.12	0.87	0.41	0.71	0.8	0.74	0.77	0.76	0.25	0.03	0.47	0.96	0.06	0.43	0.16	0.05	0.12	0.03	0.02	0.96	0.97	0.96	0.92	0.95	0.97	0.97	0.59	0.8	0.97	0.88	0.9	0.91
cg07082331	BMP8B	Pure Island	Within	0.12	0.12	0.08	0.03	0.04	0.05	0.05	0.04	0.04	0.03	0.13	0.85	0.08	0.12	0.58	0.07	0.08	0.07	0.11	0.12	0.53	0.08	0.04	0.03	0.03	0.04	0.05	0.03	0.03	0.03	0.03	0.04	0.04	0.05	0.06	0.06	0.06	0.05	0.05	0.08	0.44	0.04	0.03	0.11	0.08	0.03
cg07098866	MEGF11	Pure Island	Within	0.04	0.06	0.04	0.05	0.03	0.03	0.03	0.04	0.03	0.03	0.04	0.04	0.04	0.09	0.11	0.76	0.11	0.04	0.07	0.05	0.93	0.93	0.02	0.02	0.03	0.36	0.03	0.03	0.02	0.03	0.03	0.04	0.02	0.02	0.97	0.49	0.96	0.11	0.51	0.91	0.04	0.05	0.59	0.08	0.09	0.03
cg07099627	AC024575.6-2	Pure Island	Within	0.04	0.08	0.02	0.09	0.03	0.03	0.03	0.04	0.03	0.03	0.02	0.04	0.03	0.02	0.07	0.03	0.03	0.03	0.04	0.06	0.06	0.04	0.01	0.01	0.02	0.02	0.04	0.02	0.02	0.01	0.02	0.02	0.07	0.02	0.02	0.02	0.08	0.02	0.02	0.02	0.02	0.05	0.02	0.01	0.04	0.02
cg07103493	SLC27A6	Pure Island	Within	0.1	0.1	0.11	0.1	0.02	0.02	0.02	0.03	0.02	0.03	0.07	0.11	0.56	0.04	0.28	0.06	0.27	0.15	0.89	0.92	0.94	0.93	0.29	0.05	0.52	0.03	0.86	0.53	0.04	0.32	0.03	0.16	0.04	0.95	0.96	0.93	0.95	0.95	0.96	0.96	0.96	0.56	0.94	0.06	0.6	0.08
cg07113600	KLF12	Pure Island	Within	0.06	0.09	0.06	0.04	0.05	0.05	0.04	0.04	0.04	0.05	0.05	0.06	0.05	0.04	0.08	0.07	0.09	0.06	0.11	0.07	0.07	0.07	0.03	0.02	0.03	0.32	0.05	0.02	0.03	0.03	0.03	0.04	0.05	0.03	0.04	0.06	0.06	0.04	0.04	0.05	0.18	0.07	0.57	0.13	0.08	0.04
cg07122126	ZNF8	Pure Island	Within	0.07	0.07	0.04	0.03	0.03	0.03	0.03	0.02	0.03	0.04	0.04	0.04	0.04	0.04	0.1	0.06	0.06	0.07	0.09	0.1	0.07	0.48	0.02	0.02	0.03	0.03	0.03	0.02	0.03	0.02	0.03	0.02	0.02	0.03	0.03	0.05	0.1	0.05	0.03	0.04	0.04	0.04	0.03	0.08	0.04	0.03
cg07143898	SLIT1	Pure Island	Within	0.03	0.04	0.02	0.01	0.04	0.05	0.06	0.05	0.05	0.03	0.08	0.02	0.03	0.41	0.03	0.05	0.56	0.06	0.05	0.04	0.97	0.95	0.48	0.01	0.09	0.4	0.33	0.63	0.01	0.02	0.06	0.43	0.01	0.02	0.83	0.97	0.86	0.82	0.97	0.41	0.79	0.11	0.38	0.94	0.84	0.24
cg07148914	GGT7	Pure Island	Within	0.14	0.06	0.04	0.03	0.06	0.03	0.03	0.05	0.05	0.03	0.1	0.06	0.04	0.19	0.15	0.05	0.36	0.05	0.59	0.09	0.85	0.91	0.04	0.03	0.04	0.04	0.03	0.06	0.06	0.04	0.04	0.08	0.03	0.05	0.5	0.04	0.11	0.06	0.35	0.23	0.06	0.04	0.03	0.24	0.24	0.04
cg07159490	NXPH4	Pure Island	Within	0.07	0.08	0.04	0.02	0.05	0.04	0.03	0.04	0.03	0.02	0.04	0.5	0.03	0.05	0.09	0.12	0.72	0.05	0.15	0.12	NA	0.21	0.03	0.01	0.03	0.05	0.03	0.06	0.03	0.02	0.06	0.02	0.01	0.05	0.04	0.5	0.05	0.12	0.18	0.25	0.15	0.05	0.07	0.57	0.18	0.03
cg07175883	HOXD13	Pure Island	Within	0.08	0.09	0.04	0.02	0.03	0.03	0.03	0.03	0.02	0.02	0.03	0.87	0.03	0.19	0.11	0.9	0.15	0.76	0.14	0.12	0.9	0.94	0.14	0.96	0.93	0.94	0.97	0.02	0.24	0.02	0.02	0.02	0.01	0.02	0.62	0.03	0.08	0.39	0.28	0.59	0.96	0.91	0.8	0.85	0.79	0.02
cg07190485	STOM	Pure Island	Within	0.12	0.09	0.05	0.02	0.04	0.03	0.03	0.03	0.03	0.04	0.02	0.07	0.04	0.03	0.67	0.05	0.09	0.05	0.51	0.13	0.92	0.94	0.02	0.02	0.02	0.03	0.05	0.02	0.03	0.04	0.04	0.03	0.46	0.18	0.22	0.31	0.89	0.92	0.08	0.07	0.13	0.04	0.06	0.27	0.05	0.03
cg07195282	ZNF563	Pure Island	Within	0.1	0.14	0.07	0.05	0.04	0.05	0.04	0.05	0.06	0.09	0.04	0.07	0.12	0.26	0.3	0.16	0.08	0.08	0.12	0.14	0.12	0.11	0.03	0.03	0.87	0.04	0.04	0.08	0.08	0.39	0.13	0.89	0.21	0.03	0.03	0.04	0.12	0.49	0.03	0.08	0.35	0.05	0.03	0.81	0.05	0.22
cg07197823	INHBB	Pure Island	Within	0.07	0.06	0.1	0.03	0.07	0.09	0.08	0.08	0.07	0.04	0.06	0.95	0.07	0.08	0.09	0.07	0.08	0.07	0.1	0.09	0.94	0.96	0.04	0.04	0.03	0.04	0.04	0.03	0.04	0.05	0.05	0.05	0.03	0.05	0.05	0.16	0.44	0.05	0.04	0.08	0.06	0.06	0.05	0.12	0.09	0.03
cg07212894	SLC38A3	Pure Island	Within	0.05	0.03	0.05	0.02	0.05	0.04	0.06	0.05	0.04	0.03	0.05	0.52	0.03	0.22	0.04	0.57	0.04	0.04	0.87	0.07	0.82	0.82	0.83	0.01	0.54	0.07	0.03	0.09	0.04	0.02	0.03	0.53	0.19	0.04	0.82	0.56	0.65	0.07	0.3	0.75	0.95	0.14	0.26	0.09	0.24	0.08
cg07214572	LHX9	Pure Island	Within	0.04	0.06	0.04	0.11	0.08	0.04	0.05	0.05	0.04	0.09	0.06	0.41	0.07	0.11	0.27	0.36	0.11	0.03	0.11	0.05	0.81	0.44	0.31	0.03	0.42	0.47	0.39	0.36	0.02	0.06	0.03	0.66	0.02	0.81	0.28	0.02	0.56	0.47	0.69	0.05	0.92	0.04	0.03	0.82	0.12	0.04
cg07215749	SOCS2	Pure Island	Within	0.06	0.08	0.06	0.03	0.03	0.03	0.03	0.04	0.04	0.01	0.05	0.88	0.04	0.04	0.51	0.06	0.08	0.21	0.1	0.13	0.12	0.37	0.03	0.03	0.03	0.11	0.02	0.03	0.04	0.04	0.12	0.05	0.02	0.06	0.11	0.04	0.2	0.04	0.07	0.05	0.12	0.04	0.1	0.05	0.09	0.1
cg07237939	SLC22A3	Pure Island	Within	0.12	0.07	0.03	0.03	0.03	0.02	0.02	0.02	0.02	0.02	0.03	0.95	0.96	0.11	0.81	0.86	0.86	0.46	0.26	0.09	0.09	0.86	0.45	0.34	0.02	0.94	0.04	0.37	0.02	0.02	0.02	0.03	0.02	0.02	0.02	0.03	0.03	0.03	0.32	0.04	0.97	0.03	0.03	0.81	0.05	0.03
cg07241568	ABO	Pure Island	Within	0.08	0.07	0.05	0.05	0.06	0.07	0.08	0.09	0.07	0.03	0.07	0.75	0.88	0.48	0.25	0.89	0.85	0.7	0.47	0.18	0.19	0.63	0.35	0.43	0.86	0.91	0.95	0.38	0.24	0.09	0.21	0.55	0.55	0.07	0.03	0.03	0.09	0.92	0.03	0.13	0.93	0.04	0.03	0.75	0.19	0.84
cg07243932	SLC30A4	Pure Island	Within	0.07	0.04	0.03	0.02	0.02	0.02	0.02	0.02	0.02	0.02	0.02	0.02	0.05	0.03	0.06	0.05	0.05	0.03	0.1	0.06	0.05	0.06	0.03	0.02	0.02	0.03	0.02	0.02	0.02	0.03	0.04	0.03	0.01	0.02	0.02	0.02	0.06	0.03	0.03	0.04	0.04	0.03	0.02	0.33	0.03	0.02
cg07248310	HOOK1	Pure Island	Within	0.1	0.08	0.05	0.09	0.03	0.04	0.04	0.04	0.04	0.1	0.03	0.61	0.85	0.03	0.2	0.06	0.06	0.05	0.09	0.08	0.07	0.7	0.04	0.02	0.03	0.03	0.05	0.07	0.02	0.04	0.03	0.69	0.09	0.03	0.04	0.04	0.06	0.06	0.04	0.05	0.89	0.05	0.03	0.1	0.09	0.09
cg07265300	C2orf84	Pure Island	Within	0.1	0.11	0.05	0.17	0.08	0.08	0.06	0.07	0.08	0.12	0.1	0.06	0.09	0.05	0.15	0.07	0.09	0.09	0.13	0.15	0.11	0.11	0.02	0.03	0.04	0.05	0.04	0.04	0.04	0.03	0.04	0.15	0.05	0.28	0.04	0.04	0.1	0.04	0.21	0.08	0.05	0.05	0.04	0.18	0.11	0.05
cg07271264	MYOD1	Pure Island	Within	0.07	0.08	0.09	0.08	0.09	0.07	0.05	0.12	0.06	0.05	0.13	0.37	0.97	0.65	0.45	0.71	0.8	0.08	0.9	0.86	0.93	0.96	0.74	0.03	0.15	0.94	0.42	0.44	0.03	0.04	0.47	0.17	0.17	0.76	0.97	0.94	0.9	0.93	0.96	0.87	0.97	0.11	0.95	0.93	0.91	0.27
cg07290273	TMEM17	Pure Island	Within	0.08	0.06	0.04	0.23	0.05	0.06	0.04	0.04	0.04	0.03	0.04	0.04	0.07	0.05	0.05	0.06	0.05	0.06	0.06	0.05	0.97	0.6	0.01	0.02	0.02	0.03	0.03	0.02	0.02	0.01	0.03	0.02	0.04	0.37	0.03	0.06	0.05	0.05	0.03	0.03	0.03	0.07	0.04	0.09	0.05	0.03
cg07295678	DPYSL4	Pure Island	Within	0.04	0.06	0.08	0.03	0.04	0.04	0.09	0.08	0.08	0.04	0.22	0.5	0.96	0.65	0.51	0.05	0.52	0.04	0.5	0.6	0.93	0.92	0.05	0.02	0.03	0.03	0.03	0.02	0.02	0.11	0.03	0.82	0.02	0.86	0.94	0.97	0.93	0.95	0.93	0.96	0.96	0.02	0.93	0.19	0.86	0.04
cg07309102	KLF4	Pure Island	Within	0.05	0.03	0.02	0.01	0.03	0.04	0.02	0.02	0.03	0.02	0.02	0.99	0.99	0.02	0.18	0.03	0.04	0.02	0.04	0.05	0.04	0.42	0.01	0.01	0.01	0.01	0.04	0.01	0.02	0.01	0.01	0.01	0.02	0.01	0.01	0.02	0.02	0.02	0.02	0.01	0.01	0.03	0.02	0.06	0.04	0.02
cg07309361	PCBP4	Pure Island	Within	0.14	0.09	0.05	0.02	0.02	0.02	0.02	0.02	0.02	0.01	0.02	0.06	0.04	0.03	0.04	0.07	0.09	0.09	0.09	0.11	0.12	0.12	0.02	0.02	0.02	0.02	0.02	0.02	0.02	0.02	0.03	0.02	0.01	0.02	0.03	0.02	0.04	0.03	0.02	0.03	0.02	0.03	0.02	0.05	0.09	0.02
cg07312445	NSUN7	Pure Island	Within	0.08	0.1	0.06	0.03	0.04	0.03	0.03	0.04	0.03	0.03	0.04	0.04	0.05	0.29	0.29	0.05	0.06	0.06	0.09	0.08	0.08	0.86	0.34	0.03	0.23	0.04	0.04	0.03	0.03	0.05	0.03	0.79	0.03	0.2	0.03	0.49	0.04	0.04	0.67	0.23	0.92	0.06	0.05	0.72	0.09	0.03
cg07336230	KIF6	Pure Island	Within	0.04	0.06	0.05	0.04	0.02	0.02	0.02	0.02	0.02	0.03	0.04	0.02	0.97	0.02	0.23	0.03	0.03	0.02	0.07	0.04	0.93	0.94	0.02	0.02	0.01	0.02	0.02	0.01	0.02	0.02	0.02	0.02	0.04	0.02	0.98	0.13	0.92	0.02	0.77	0.19	0.36	0.73	0.02	0.89	0.07	0.02
cg07347137	ZCCHC11	Pure Island	Within	0.08	0.07	0.06	0.03	0.05	0.09	0.04	0.04	0.04	0.03	0.04	0.07	0.04	0.04	0.09	0.6	0.07	0.06	0.13	0.09	0.1	0.07	0.03	0.03	0.03	0.8	0.04	0.04	0.03	0.04	0.04	0.04	0.02	0.04	0.39	0.04	0.07	0.04	0.04	0.47	0.03	0.05	0.62	0.06	0.07	0.03
cg07356771	CHDH	Pure Island	Within	0.04	0.04	0.03	0.03	0.03	0.03	0.03	0.04	0.03	0.02	0.15	0.68	0.19	0.09	0.71	0.04	0.04	0.03	0.06	0.03	0.04	0.03	0.1	0.02	0.02	0.03	0.02	0.05	0.02	0.08	0.03	0.95	0.82	0.14	0.02	0.02	0.04	0.02	0.02	0.04	0.27	0.03	0.02	0.05	0.15	0.12
cg07376535	ADCYAP1	Pure Island	Within	0.06	0.09	0.05	0.1	0.08	0.05	0.07	0.09	0.05	0.05	0.08	0.65	0.92	0.59	0.24	0.86	0.49	0.68	0.87	0.83	0.78	0.81	0.08	0.02	0.84	0.73	0.04	0.17	0.91	0.26	0.4	0.77	0.05	0.53	0.72	0.69	0.7	0.78	0.87	0.93	0.92	0.43	0.62	0.68	0.77	0.85
cg07380496	MAP1B	Pure Island	Within	0.05	0.04	0.03	0.03	0.03	0.02	0.02	0.02	0.02	0.02	0.02	0.53	0.54	0.03	0.17	0.04	0.07	0.39	0.1	0.05	0.9	0.89	0.27	0.02	0.02	0.02	0.02	0.35	0.02	0.02	0.02	0.02	0.02	0.01	0.98	0.98	0.95	0.74	0.98	0.98	0.64	0.02	0.98	0.49	0.09	0.02
cg07422345	CEBPA	Pure Island	Within	0.07	0.08	0.05	0.02	0.03	0.03	0.03	0.03	0.03	0.01	0.05	0.78	0.04	0.04	0.4	0.05	0.09	0.04	0.26	0.11	0.08	0.05	0.05	0.04	0.03	0.03	0.03	0.04	0.03	0.03	0.04	0.13	0.08	0.03	0.08	0.05	0.1	0.07	0.06	0.18	0.04	0.04	0.05	0.07	0.2	0.03
cg07433344	HSD17B8	Pure Island	Within	0.06	0.09	0.06	0.02	0.02	0.02	0.02	0.02	0.02	0.02	0.02	0.65	0.03	0.03	0.19	0.32	0.31	0.04	0.06	0.06	0.05	0.38	0.02	0.02	0.02	0.33	0.02	0.35	0.02	0.02	0.02	0.02	0.03	0.02	0.02	0.98	0.07	0.02	0.03	0.19	0.6	0.03	0.02	0.06	0.35	0.88
cg07440414	TCF7	Associated Island	Within	0.1	0.1	0.06	0.03	0.04	0.04	0.04	0.04	0.03	0.02	0.04	0.94	0.11	0.06	0.82	0.94	0.09	0.5	0.1	0.13	0.09	0.18	0.14	0.04	0.04	0.95	0.04	0.03	0.04	0.08	0.12	0.06	0.05	0.03	0.03	0.04	0.05	0.04	0.07	0.06	0.37	0.05	0.04	0.11	0.07	0.04
cg07441272	RPL39L	Pure Island	Within	0.08	0.06	0.05	0.06	0.05	0.05	0.04	0.05	0.04	0.07	0.13	0.05	0.05	0.16	0.7	0.38	0.07	0.2	0.88	0.92	0.9	0.94	0.03	0.29	0.03	0.2	0.03	0.03	0.03	0.03	0.03	0.03	0.81	0.29	0.48	0.05	0.85	0.43	0.94	0.03	0.95	0.49	0.66	0.87	0.07	0.04
cg07442479	GDNF	Pure Island	Within	0.07	0.09	0.08	0.06	0.06	0.07	0.11	0.1	0.07	0.06	0.15	0.89	0.21	0.27	0.59	0.35	0.88	0.47	0.93	0.91	0.93	0.94	0.38	0.57	0.11	0.59	0.07	0.43	0.08	0.5	0.1	0.93	0.78	0.96	0.96	0.97	0.94	0.95	0.95	0.95	0.66	0.68	0.84	0.9	0.91	0.16
cg07447922	EPHA10	Pure Island	Within	0.21	0.21	0.08	0.24	0.05	0.08	0.06	0.06	0.04	0.04	0.04	0.07	0.95	0.29	0.33	0.79	0.45	0.16	0.85	0.61	0.26	0.81	0.11	0.03	0.07	0.23	0.04	0.48	0.51	0.05	0.18	0.24	0.04	0.04	0.81	0.07	0.78	0.6	0.95	0.95	0.87	0.14	0.94	0.82	0.54	0.79
cg07448460	GGH	Pure Island	Within	0.05	0.04	0.04	0.03	0.04	0.04	0.04	0.05	0.04	0.03	0.07	0.02	0.04	0.05	0.06	0.07	0.13	0.04	0.05	0.03	0.04	0.03	0.03	0.02	0.02	0.04	0.03	0.02	0.02	0.02	0.04	0.02	0.02	0.03	0.04	0.04	0.11	0.05	0.03	0.48	0.06	0.05	0.04	0.12	0.06	0.05
cg07452799	PARD3	Pure Island	Within	0.03	0.04	0.03	0.01	0.04	0.04	0.04	0.05	0.04	0.02	0.02	0.02	0.02	0.03	0.03	0.04	0.04	0.03	0.09	0.03	0.02	0.02	0.01	0.01	0.01	0.03	0.01	0.02	0.01	0.02	0.03	0.01	0.01	0.01	0.02	0.01	0.04	0.01	0.01	0.02	0.02	0.02	0.02	0.06	0.06	0.04
cg07461318	NTN4	Pure Island	Within	0.07	0.06	0.13	0.04	0.04	0.04	0.05	0.04	0.04	0.02	0.16	0.05	0.23	0.18	0.49	0.38	0.06	0.05	0.12	0.18	0.78	0.63	0.36	0.03	0.04	0.65	0.05	0.11	0.05	0.25	0.05	0.41	0.06	0.12	0.41	0.87	0.17	0.19	0.13	0.15	0.15	0.11	0.03	0.36	0.05	0.12
cg07469792	RASSF8	Pure Island	Within	0.04	0.03	0.02	0.02	0.03	0.02	0.02	0.02	0.03	0.01	0.01	0.02	0.03	0.02	0.06	0.04	0.04	0.03	0.04	0.04	0.92	0.93	0.01	0.55	0.02	0.02	0.02	0.02	0.01	0.01	0.02	0.02	0.01	0.01	0.98	0.01	0.39	0.01	0.03	0.02	0.03	0.02	0.02	0.04	0.05	0.02
cg07480567	HS3ST3A1	Pure Island	Within	0.05	0.05	0.04	0.02	0.04	0.03	0.05	0.03	0.04	0.02	0.1	0.92	0.33	0.03	0.06	0.13	0.85	0.46	0.67	0.41	0.84	0.95	0.33	0.26	0.84	0.56	0.03	0.47	0.02	0.02	0.06	0.03	0.38	0.82	0.96	0.95	0.91	0.95	0.96	0.95	0.71	0.92	0.89	0.9	0.78	0.42
cg07490776	AP3M2	Pure Island	Within	0.05	0.04	0.03	0.06	0.03	0.02	0.03	0.02	0.02	0.03	0.02	0.03	0.03	0.02	0.1	0.04	0.92	0.04	0.07	0.05	0.91	0.95	0.02	0.02	0.01	0.02	0.02	0.13	0.02	0.02	0.02	0.03	0.02	0.02	0.02	0.02	0.04	0.02	0.46	0.03	0.94	0.04	0.02	0.19	0.05	0.02
cg07494047	ZNF304	Pure Island	Within	0.05	0.06	0.03	0.03	0.02	0.02	0.03	0.03	0.02	0.03	0.03	0.03	0.03	0.04	0.06	0.05	0.07	0.03	0.83	0.86	0.91	0.89	0.02	0.02	0.13	0.03	0.02	0.02	0.01	0.02	0.02	0.02	0.19	0.41	0.9	0.72	0.85	0.92	0.9	0.03	0.03	0.05	0.07	0.06	0.04	0.02
cg07494518	SIK1	Pure Island	Within	0.05	0.05	0.03	0.02	0.02	0.03	0.02	0.03	0.02	0.02	0.02	0.03	0.04	0.03	0.34	0.21	0.05	0.03	0.83	0.75	0.9	0.58	0.03	0.71	0.03	0.04	0.02	0.02	0.24	0.02	0.03	0.02	0.02	0.02	0.63	0.03	0.88	0.92	0.16	0.92	0.08	0.03	0.05	0.77	0.04	0.02
cg07519011	TBC1D4	Pure Island	Within	0.21	0.14	0.1	0.06	0.07	0.06	0.06	0.08	0.07	0.05	0.06	0.09	0.09	0.08	0.16	0.11	0.15	0.1	0.17	0.18	0.13	0.15	0.06	0.06	0.06	0.07	0.07	0.06	0.06	0.05	0.07	0.06	0.04	0.07	0.07	0.07	0.17	0.1	0.1	0.09	0.08	0.1	0.06	0.12	0.11	0.08
cg07525445	TPM1	Pure Island	Within	0.07	0.06	0.04	0.05	0.04	0.04	0.04	0.05	0.03	0.05	0.03	0.04	0.61	0.04	0.1	0.11	0.07	0.06	0.1	0.14	0.45	0.11	0.08	0.02	0.01	0.48	0.03	0.02	0.03	0.03	0.27	0.84	0.06	0.04	0.03	0.02	0.24	0.02	0.02	0.03	0.08	0.05	0.04	0.82	0.92	0.04
cg07526069	GOT1	Pure Island	Within	0.04	0.04	0.03	0.03	0.04	0.03	0.03	0.03	0.03	0.04	0.03	0.02	0.02	0.04	0.05	0.05	0.05	0.04	0.07	0.05	0.08	0.05	0.01	0.01	0.02	0.03	0.02	0.01	0.01	0.01	0.02	0.01	0.02	0.02	0.02	0.02	0.03	0.02	0.02	0.03	0.03	0.02	0.02	0.07	0.04	0.03
cg07540118	ADAM19	Pure Island	Within	0.06	0.08	0.06	0.05	0.05	0.04	0.05	0.05	0.05	0.03	0.03	0.07	0.06	0.04	0.11	0.42	0.33	0.06	0.09	0.07	0.92	0.94	0.04	0.04	0.04	0.05	0.05	0.04	0.04	0.04	0.04	0.03	0.06	0.05	0.05	0.04	0.58	0.04	0.46	0.26	0.08	0.06	0.48	0.13	0.09	0.05
cg07550362	TAC1	Pure Island	Within	0.05	0.07	0.08	0.04	0.18	0.1	0.13	0.24	0.11	0.04	0.07	0.56	0.74	0.53	0.16	0.58	0.15	0.17	0.65	0.57	0.78	0.8	0.42	0.88	0.48	0.79	0.86	0.49	0.89	0.5	0.31	0.67	0.97	0.08	0.72	0.5	0.64	0.75	0.88	0.54	0.68	0.22	0.68	0.82	0.18	0.58
cg07558455	KANK4	Pure Island	Within	0.07	0.06	0.05	0.03	0.03	0.03	0.03	0.04	0.02	0.02	0.04	0.9	0.04	0.03	0.43	0.78	0.1	0.04	0.18	0.43	0.94	0.93	0.48	0.03	0.12	0.89	0.96	0.69	0.02	0.04	0.03	0.23	0.62	0.05	0.55	0.04	0.78	0.05	0.98	0.96	0.12	0.05	0.52	0.84	0.49	0.03
cg07570142	MOXD1	Pure Island	Within	0.1	0.11	0.06	0.04	0.03	0.03	0.07	0.04	0.05	0.02	0.06	0.05	0.07	0.74	0.52	0.71	0.37	0.85	0.87	0.89	0.92	0.91	0.05	0.03	0.09	0.93	0.08	0.13	0.03	0.2	0.04	0.86	0.03	0.53	0.91	0.25	0.88	0.45	0.9	0.55	0.93	0.14	0.06	0.71	0.13	0.08
cg07572341	FOXA2	Pure Island	Within	0.07	0.1	0.08	0.04	0.07	0.06	0.03	0.06	0.08	0.05	0.04	0.58	0.92	0.45	0.83	0.67	0.66	0.15	0.19	0.06	0.11	0.84	0.17	0.23	0.03	0.07	0.04	0.13	0.02	0.37	0.17	0.35	0.02	0.03	0.02	0.03	0.07	0.03	0.04	0.18	0.89	0.05	0.03	0.84	0.08	0.85
cg07588113	C7orf63	Pure Island	Within	0.03	0.02	0.02	0.01	0.03	0.03	0.02	0.03	0.03	0.02	0.02	0.02	0.48	0.02	0.04	0.03	0.04	0.02	0.03	0.02	0.03	0.02	0.01	0.01	0.01	0.02	0.01	0.01	0.01	0.01	0.02	0.01	0.01	0.01	0.01	0.01	0.03	0.01	0.01	0.02	0.08	0.02	0.03	0.04	0.04	0.02
cg07596494	KIF3C	Pure Island	Within	0.06	0.08	0.03	0.02	0.03	0.04	0.03	0.03	0.03	0.02	0.03	0.04	0.03	0.13	0.16	0.06	0.06	0.05	0.1	0.08	0.09	0.14	0.05	0.02	0.03	0.17	0.21	0.02	0.02	0.03	0.04	0.07	0.01	0.02	0.03	0.11	0.06	0.04	0.03	0.08	0.05	0.03	0.06	0.84	0.21	0.03
cg07611334	NRSN2	Pure Island	Within	0.08	0.07	0.09	0.04	0.06	0.07	0.07	0.07	0.07	0.05	0.21	0.05	0.94	0.37	0.62	0.09	0.07	0.06	0.08	0.08	0.61	0.93	0.05	0.05	0.05	0.05	0.08	0.04	0.04	0.06	0.41	0.95	0.03	0.04	0.16	0.97	0.08	0.08	0.96	0.3	0.06	0.09	0.57	0.84	0.09	0.06
cg07625840	PRSS12	Pure Island	Within	0.14	0.14	0.09	0.09	0.05	0.06	0.04	0.05	0.05	0.06	0.06	0.6	0.12	0.07	0.7	0.15	0.2	0.92	0.28	0.24	0.14	0.75	0.06	0.05	0.05	0.17	0.06	0.09	0.07	0.07	0.06	0.05	0.04	0.07	0.08	0.09	0.13	0.78	0.08	0.09	0.07	0.09	0.05	0.11	0.09	0.06
cg07641524	MSRB3	Pure Island	Within	0.06	0.05	0.04	0.07	0.14	0.15	0.12	0.13	0.14	0.19	0.13	0.04	0.05	0.05	0.08	0.4	0.06	0.08	0.08	0.08	0.95	0.97	0.03	0.04	0.03	0.39	0.04	0.03	0.03	0.02	0.1	0.02	0.21	0.07	0.98	0.6	0.97	0.04	0.99	0.44	0.03	0.05	0.04	0.13	0.11	0.05
cg07658718	CDK5R1	Pure Island	Within	0.08	0.09	0.06	0.08	0.05	0.06	0.05	0.05	0.04	0.03	0.04	0.06	0.23	0.05	0.1	0.06	0.11	0.07	0.11	0.09	0.09	0.08	0.14	0.04	0.06	0.05	0.12	0.06	0.05	0.05	0.05	0.17	0.04	0.04	0.07	0.05	0.1	0.07	0.08	0.24	0.06	0.07	0.06	0.17	0.08	0.05
cg07671603	RNF32	Pure Island	Within	0.05	0.06	0.03	0.05	0.06	0.07	0.07	0.07	0.05	0.07	0.04	0.93	0.03	0.03	0.06	0.07	0.07	0.06	0.05	0.05	0.08	0.04	0.02	0.02	0.03	0.02	0.02	0.02	0.03	0.02	0.02	0.03	0.04	0.02	0.04	0.02	0.08	0.03	0.04	0.03	0.02	0.03	0.04	0.1	0.05	0.03
cg07684796	DKK1	Pure Island	Within	0.08	0.08	0.05	0.11	0.03	0.03	0.03	0.05	0.03	0.03	0.03	0.91	0.93	0.04	0.88	0.06	0.06	0.87	0.09	0.12	0.85	0.9	0.11	0.07	0.03	0.03	0.03	0.03	0.03	0.04	0.04	0.64	0.04	0.08	0.88	0.03	0.06	0.04	0.89	0.04	0.57	0.05	0.03	0.06	0.05	0.87
cg07686479	LMX1A	Pure Island	Within	0.02	0.04	0.03	0.06	0.06	0.07	0.05	0.09	0.07	0.07	0.17	0.22	0.96	0.46	0.07	0.64	0.43	0.3	0.75	0.31	0.3	0.58	0.41	0.94	0.31	0.83	0.9	0.46	0.88	0.48	0.22	0.53	0.3	0.68	0.48	0.62	0.29	0.78	0.86	0.94	0.84	0.21	0.14	0.72	0.41	0.43
cg07690018	CPNE7	Pure Island	Within	0.2	0.14	0.07	0.03	0.03	0.05	0.04	0.04	0.04	0.02	0.06	0.97	0.06	0.12	0.81	0.73	0.91	0.15	0.25	0.17	0.14	0.13	0.14	0.02	0.02	0.76	0.05	0.35	0.83	0.02	0.24	0.02	0.95	0.03	0.03	0.03	0.38	0.02	0.59	0.44	0.02	0.07	0.03	0.03	0.9	0.2
cg07699362	GPX3	Pure Island	Within	0.09	0.08	0.04	0.04	0.04	0.03	0.03	0.04	0.03	0.03	0.05	0.31	0.56	0.91	0.76	0.05	0.85	0.36	0.37	0.43	0.84	0.82	0.32	0.04	0.32	0.05	0.39	0.02	0.02	0.02	0.03	0.11	0.02	0.07	0.03	0.75	0.05	0.04	0.56	0.42	0.91	0.03	0.29	0.82	0.1	0.03
cg07699440	FAH	Pure Island	Within	0.04	0.04	0.03	0.02	0.03	0.03	0.02	0.03	0.02	0.01	0.02	0.02	0.02	0.03	0.04	0.03	0.03	0.03	0.04	0.04	0.03	0.02	0.01	0.01	0.01	0.02	0.02	0.01	0.01	0.01	0.02	0.01	0.02	0.01	0.01	0.01	0.03	0.01	0.01	0.08	0.02	0.02	0.01	0.04	0.03	0.03
cg07704144	RAD21L1	Pure Island	Within	0.09	0.06	0.06	0.06	0.05	0.05	0.05	0.06	0.04	0.04	0.03	0.05	0.06	0.04	0.11	0.45	0.11	0.06	0.1	0.08	0.07	0.06	0.04	0.03	0.03	0.95	0.05	0.03	0.03	0.03	0.03	0.04	0.04	0.18	0.1	0.34	0.1	0.22	0.08	0.08	0.11	0.05	0.04	0.09	0.06	0.03
cg07708788	SLCO2A1	Pure Island	Within	0.04	0.03	0.02	0.14	0.02	0.03	0.03	0.03	0.02	0.03	0.06	0.02	0.36	0.07	0.28	0.1	0.1	0.03	0.48	0.58	0.59	0.79	0.36	0.01	0.07	0.1	0.86	0.38	0.02	0.02	0.04	0.52	0.29	0.01	0.03	0.02	0.07	0.03	0.33	0.13	0.77	0.04	0.15	0.86	0.04	0.04
cg07737781	MLXIPL	Pure Island	Within	0.12	0.15	0.12	0.03	0.07	0.06	0.14	0.06	0.06	0.03	0.06	0.81	0.86	0.11	0.87	0.12	0.13	0.09	0.12	0.13	0.14	0.19	0.09	0.08	0.06	0.07	0.19	0.14	0.06	0.05	0.07	0.33	0.04	0.06	0.07	0.07	0.14	0.07	0.04	0.08	0.1	0.08	0.06	0.1	0.11	0.06
cg07747970	LHX1	Pure Island	Within	0.04	0.09	0.12	0.02	0.14	0.1	0.17	0.14	0.06	0.07	0.09	0.19	0.46	0.37	0.05	0.05	0.13	0.28	0.36	0.09	0.76	0.85	0.15	0.02	0.58	0.03	0.02	0.02	0.02	0.03	0.08	0.03	0.38	0.05	0.21	0.42	0.39	0.05	0.85	0.54	0.03	0.04	0.02	0.66	0.81	0.4
cg07748540	PDGFD	Pure Island	Within	0.1	0.1	0.04	0.22	0.06	0.07	0.07	0.07	0.06	0.18	0.06	0.11	0.44	0.18	0.84	0.76	0.82	0.44	0.76	0.73	0.75	0.71	0.1	0.03	0.04	0.86	0.44	0.22	0.03	0.08	0.03	0.04	0.2	0.89	0.94	0.92	0.88	0.93	0.85	0.06	0.11	0.06	0.03	0.83	0.1	0.06
cg07749808	SYT7	Pure Island	Within	0.06	0.05	0.03	0.02	0.02	0.02	0.02	0.02	0.02	0.01	0.02	0.03	0.04	0.07	0.14	0.03	0.06	0.03	0.08	0.06	0.06	0.95	0.02	0.02	0.02	0.02	0.03	0.01	0.02	0.02	0.02	0.02	0.02	0.02	0.02	0.02	0.06	0.04	0.02	0.03	0.04	0.03	0.01	0.11	0.04	0.02
cg07755653	STX11	Pure Island	Within	0.12	0.13	0.06	0.04	0.03	0.03	0.03	0.04	0.03	0.04	0.04	0.07	0.22	0.08	0.66	0.07	0.1	0.07	0.19	0.27	0.87	0.47	0.03	0.06	0.03	0.06	0.04	0.04	0.03	0.02	0.03	0.43	0.25	0.06	0.4	0.04	0.37	0.03	0.83	0.05	0.17	0.03	0.04	0.07	0.05	0.03
cg07758904	SLC46A2	Pure Island	Within	0.08	0.05	0.06	0.08	0.05	0.07	0.03	0.03	0.09	0.19	0.22	0.9	0.74	0.89	0.77	0.4	0.21	0.11	0.85	0.81	0.84	0.9	0.95	0.97	0.46	0.63	0.97	0.92	0.97	0.36	0.04	0.96	0.97	0.94	0.97	0.95	0.94	0.97	0.96	0.97	0.96	0.8	0.81	0.88	0.45	0.32
cg07766315	FAM174B	Pure Island	Within	0.11	0.11	0.08	0.04	0.04	0.04	0.04	0.04	0.04	0.06	0.05	0.39	0.15	0.24	0.2	0.06	0.12	0.07	0.11	0.14	0.16	0.15	0.27	0.03	0.03	0.04	0.06	0.13	0.03	0.04	0.03	0.06	0.03	0.05	0.04	0.82	0.06	0.04	0.08	0.24	0.82	0.04	0.04	0.65	0.06	0.05
cg07766612	SLC30A2	Pure Island	Within	0.07	0.07	0.04	0.04	0.03	0.03	0.03	0.04	0.03	0.03	0.02	0.64	0.68	0.26	0.32	0.93	0.09	0.93	0.84	0.4	0.86	0.87	0.71	0.03	0.11	0.97	0.35	0.32	0.38	0.03	0.03	0.59	0.04	0.03	0.98	0.98	0.95	0.13	0.97	0.69	0.98	0.04	0.65	0.91	0.89	0.89
cg07774025	HSD17B7	Pure Island	Within	0.11	0.07	0.05	0.15	0.07	0.09	0.11	0.07	0.13	0.17	0.07	0.05	0.05	0.06	0.06	0.08	0.09	0.04	0.2	0.19	0.08	0.18	0.05	0.02	0.03	0.04	0.06	0.03	0.1	0.02	0.03	0.06	0.14	0.03	0.05	0.07	0.1	0.05	0.09	0.11	0.09	0.07	0.04	0.06	0.12	0.1
cg07775675	SPHK1	Pure Island	Within	0.15	0.15	0.09	0.09	0.04	0.05	0.05	0.04	0.04	0.03	0.04	0.07	0.06	0.04	0.17	0.07	0.11	0.07	0.1	0.1	0.21	0.14	0.03	0.03	0.03	0.04	0.07	0.03	0.04	0.03	0.03	0.03	0.04	0.04	0.03	0.05	0.05	0.03	0.04	0.05	0.05	0.08	0.04	0.07	0.05	0.03
cg07778029	HOXA9	Pure Island	Within	0.07	0.04	0.02	0.02	0.12	0.05	0.02	0.07	0.08	0.01	0.14	0.02	0.94	0.15	0.04	0.89	0.91	0.88	0.05	0.04	0.05	0.04	0.18	0.93	0.89	0.9	0.93	0.18	0.9	0.94	0.88	0.95	0.93	0.82	0.14	0.02	0.1	0.09	0.02	0.92	0.93	0.93	0.84	0.05	0.87	0.84
cg07789083	GPRC5C	Pure Island	Within	0.06	0.07	0.04	0.02	0.04	0.04	0.03	0.04	0.03	0.02	0.05	0.04	0.04	0.04	0.19	0.05	0.15	0.05	0.07	0.07	0.05	0.96	0.5	0.03	0.03	0.03	0.03	0.02	0.08	0.05	0.03	0.03	0.03	0.05	0.03	0.03	0.04	0.03	0.04	0.05	0.6	0.05	0.03	0.36	0.05	0.05
cg07806164	UBE2E2	Pure Island	Within	0.12	0.1	0.08	0.04	0.06	0.06	0.06	0.05	0.04	0.03	0.06	0.06	0.06	0.06	0.13	0.09	0.1	0.08	0.12	0.12	0.87	0.9	0.04	0.03	0.04	0.08	0.03	0.03	0.04	0.03	0.04	0.04	0.04	0.03	0.89	0.1	0.09	0.07	0.03	0.06	0.07	0.07	0.1	0.28	0.07	0.04
cg07811750	CAMTA2	Pure Island	Within	0.05	0.04	0.04	0.02	0.03	0.03	0.03	0.02	0.02	0.04	0.02	0.04	0.13	0.02	0.07	0.04	0.04	0.04	0.07	0.05	0.06	0.05	0.02	0.02	0.02	0.02	0.03	0.03	0.02	0.01	0.02	0.05	0.02	0.02	0.03	0.02	0.05	0.02	0.02	0.04	0.02	0.03	0.03	0.07	0.06	0.02
cg07817783	DAP	Pure Island	Within	0.06	0.13	0.07	0.05	0.03	0.03	0.03	0.03	0.04	0.04	0.06	0.25	0.03	0.34	0.58	0.06	0.06	0.06	0.06	0.08	0.84	0.44	0.02	0.02	0.03	0.07	0.06	0.02	0.04	0.02	0.03	0.12	0.05	0.27	0.1	0.31	0.04	0.44	0.03	0.45	0.3	0.05	0.02	0.81	0.07	0.02
cg07845566	B3GAT1	Pure Island	Within	0.04	0.05	0.03	0.02	0.02	0.02	0.02	0.02	0.02	0.01	0.03	0.03	0.67	0.04	0.05	0.72	0.42	0.16	0.04	0.04	0.05	0.5	0.35	0.02	0.02	0.18	0.02	0.23	0.02	0.03	0.06	0.51	0.24	0.02	0.02	0.56	0.38	0.87	0.98	0.17	0.71	0.03	0.03	0.81	0.39	0.1
cg07846220	LAMA1	Pure Island	Within	0.04	0.04	0.03	0.04	0.03	0.02	0.03	0.03	0.03	0.02	0.02	0.57	0.98	0.04	0.5	0.92	0.9	0.92	0.96	0.95	0.97	0.97	0.66	0.02	0.02	0.98	0.02	0.02	0.02	0.02	0.18	0.01	0.02	0.99	0.99	0.99	0.97	0.98	0.98	0.98	0.99	0.86	0.99	0.95	0.87	0.57
cg07849904	MN1	Pure Island	Within	0.12	0.13	0.07	0.06	0.07	0.06	0.07	0.06	0.05	0.05	0.05	0.1	0.08	0.09	0.18	0.13	0.12	0.08	0.15	0.14	0.76	0.8	0.13	0.09	0.07	0.1	0.05	0.07	0.07	0.07	0.08	0.08	0.04	0.06	0.89	0.08	0.14	0.11	0.92	0.06	0.06	0.07	0.06	0.11	0.86	0.07
cg07850604	INSM2	Pure Island	Within	0.11	0.14	0.07	0.04	0.03	0.04	0.04	0.05	0.03	0.02	0.07	0.83	0.05	0.05	0.17	0.31	0.12	0.08	0.12	0.27	0.83	0.86	0.04	0.02	0.02	0.08	0.03	0.02	0.02	0.31	0.08	0.42	0.02	0.03	0.93	0.93	0.89	0.03	0.93	0.89	0.07	0.05	0.31	0.82	0.44	0.03
cg07872652	CNIH2	Pure Island	Within	0.15	0.15	0.11	0.05	0.05	0.05	0.06	0.05	0.05	0.03	0.05	0.83	0.09	0.11	0.33	0.44	0.12	0.13	0.14	0.16	0.23	0.94	0.04	0.04	0.04	0.42	0.05	0.03	0.04	0.06	0.04	0.07	0.04	0.05	0.08	0.07	0.14	0.03	0.33	0.62	0.08	0.05	0.46	0.34	0.1	0.04
cg07879727	WNT3	Pure Island	Within	0.07	0.04	0.05	0.18	0.11	0.04	0.05	0.07	0.06	0.04	0.05	0.26	0.04	0.1	0.37	0.24	0.72	0.05	0.44	0.08	0.39	NA	0.38	0.02	0.69	0.26	0.61	0.61	0.03	0.05	0.03	0.69	0.17	0.04	0.24	0.11	0.13	0.5	0.68	0.07	0.93	0.08	0.29	0.79	0.09	0.51
cg07880061	RAB24	Pure Island	Within	0.08	0.08	0.05	0.25	0.04	0.04	0.05	0.05	0.04	0.11	0.11	0.05	0.25	0.35	0.1	0.09	0.17	0.05	0.16	0.11	0.18	0.08	0.02	0.02	0.05	0.03	0.05	0.04	0.02	0.04	0.03	0.02	0.1	0.03	0.12	0.09	0.08	0.05	0.89	0.93	0.06	0.08	0.11	0.63	0.08	0.04
cg07882831	TTYH2	Pure Island	Within	0.06	0.05	0.04	0.03	0.03	0.02	0.02	0.03	0.03	0.02	0.03	0.28	0.02	0.04	0.27	0.06	0.31	0.03	0.38	0.06	0.23	0.03	0.04	0.02	0.07	0.02	0.03	0.04	0.03	0.02	0.02	0.02	0.02	0.02	0.03	0.03	0.31	0.04	0.07	0.11	0.03	0.05	0.03	0.1	0.05	0.26
cg07888234	TNFRSF11A	Pure Island	Within	0.08	0.08	0.04	0.04	0.06	0.06	0.06	0.07	0.07	0.04	0.08	0.87	0.03	0.09	0.51	0.06	0.29	0.1	0.58	0.1	0.1	0.94	0.26	0.59	0.03	0.24	0.05	0.08	0.03	0.27	0.11	0.89	0.62	0.03	0.03	0.66	0.11	0.92	0.25	0.06	0.48	0.05	0.17	0.34	0.67	0.09
cg07912181	HSD17B12	Pure Island	Within	0.04	0.04	0.04	0.03	0.02	0.03	0.02	0.02	0.02	0.02	0.04	0.35	0.03	0.03	0.05	0.05	0.37	0.03	0.05	0.05	0.06	0.13	0.02	0.02	0.02	0.38	0.02	0.02	0.02	0.02	0.02	0.02	0.02	0.02	0.02	0.02	0.04	0.02	0.03	0.02	0.02	0.03	0.02	0.05	0.03	0.02
cg07914959	BACH2	Pure Island	Within	0.07	0.07	0.05	0.02	0.03	0.03	0.03	0.03	0.02	0.02	0.02	0.05	0.05	0.03	0.06	0.05	0.06	0.05	0.09	0.05	0.06	0.94	0.02	0.02	0.02	0.04	0.03	0.02	0.02	0.02	0.03	0.03	0.01	0.02	0.63	0.05	0.13	0.04	0.02	0.04	0.43	0.03	0.02	0.07	0.06	0.03
cg07933199	C3orf59	Pure Island	Within	0.08	0.06	0.1	0.03	0.04	0.04	0.04	0.04	0.04	0.03	0.12	0.06	0.06	0.09	0.08	0.09	0.06	0.04	0.09	0.07	0.92	0.13	0.03	0.03	0.03	0.04	0.03	0.03	0.03	0.03	0.03	0.03	0.03	0.06	0.08	0.12	0.06	0.12	0.08	0.09	0.09	0.11	0.05	0.09	0.07	0.04
cg07940485	SLC16A10	Pure Island	Within	0.1	0.06	0.04	0.04	0.03	0.03	0.03	0.02	0.03	0.02	0.02	0.04	0.03	0.68	0.34	0.26	0.12	0.05	0.06	0.08	0.89	0.07	0.03	0.02	0.03	0.74	0.03	0.02	0.02	0.02	0.02	0.02	0.03	0.02	0.03	0.02	0.08	0.03	0.02	0.86	0.08	0.03	0.03	0.07	0.05	0.02
cg07952391	THNSL2	Pure Island	Within	0.08	0.06	0.08	0.07	0.04	0.04	0.05	0.04	0.05	0.07	0.16	0.15	0.93	0.21	0.16	0.43	0.06	0.06	0.19	0.24	0.91	0.92	0.41	0.17	0.58	0.48	0.54	0.32	0.03	0.07	0.04	0.6	0.72	0.6	0.06	0.57	0.13	0.44	0.49	0.14	0.92	0.09	0.38	0.83	0.45	0.03
cg07964538	CAV1	Pure Island	Within	0.04	0.05	0.02	0.19	0.06	0.05	0.05	0.04	0.04	0.09	0.03	0.04	0.03	0.02	0.04	0.04	0.04	0.04	0.06	0.06	0.04	0.03	0.01	0.01	0.02	0.02	0.03	0.02	0.02	0.01	0.05	0.02	0.12	0.54	0.03	0.02	0.05	0.03	0.03	0.02	0.01	0.03	0.05	0.05	0.06	0.03
cg07965823	ISM2	Pure Island	Within	0.06	0.09	0.08	0.03	0.12	0.11	0.12	0.1	0.14	0.05	0.12	0.57	0.68	0.9	0.8	0.95	0.84	0.93	0.28	0.42	0.97	0.96	0.76	0.07	0.27	0.96	0.82	0.3	0.04	0.5	0.07	0.98	0.02	0.07	0.98	0.74	0.94	0.03	0.97	0.73	0.98	0.11	0.97	0.94	0.34	0.1
cg07986525	NFE2L3	Pure Island	Within	0.06	0.09	0.07	0.02	0.04	0.03	0.03	0.03	0.03	0.01	0.03	0.88	0.06	0.09	0.23	0.07	0.06	0.6	0.05	0.08	0.06	0.19	0.03	0.04	0.04	0.07	0.04	0.02	0.03	0.03	0.04	0.04	0.02	0.04	0.05	0.03	0.04	0.03	0.03	0.06	0.06	0.02	0.03	0.09	0.09	0.04
cg08001895	EPHA7	Pure Island	Within	0.09	0.09	0.07	NA	0.07	0.09	0.06	0.06	0.08	0.18	0.08	0.86	0.06	0.64	0.84	0.11	0.79	0.78	0.75	NA	NA	NA	0.09	0.04	0.08	0.06	0.13	0.14	0.05	0.08	0.04	0.05	0.08	0.06	0.83	0.43	0.78	0.72	0.82	0.09	0.45	0.08	0.86	0.79	0.12	0.77
cg08003150	KCNQ2	Pure Island	Within	0.07	0.09	0.05	0.08	0.04	0.04	0.03	0.03	0.04	0.03	0.03	0.06	0.94	0.37	0.24	0.75	0.13	0.07	0.41	0.12	0.9	0.83	0.25	0.02	0.03	0.26	0.02	0.03	0.09	0.3	0.05	0.35	0.05	0.03	0.98	0.92	0.89	0.86	0.94	0.11	0.03	0.05	0.59	0.05	0.91	0.47
cg08009622	COL12A1	Pure Island	Within	0.05	0.11	0.11	0.05	0.04	0.04	0.03	0.03	0.03	0.06	0.14	0.49	0.96	0.87	0.95	0.91	0.69	0.28	0.86	0.91	0.92	0.92	0.95	0.93	0.95	0.95	0.95	0.97	0.31	0.95	0.34	0.93	0.82	0.93	0.94	0.4	0.91	0.95	0.93	0.95	0.96	0.81	0.96	0.86	0.66	0.93
cg08015253	MOCOS	Pure Island	Within	0.13	0.1	0.07	0.08	0.05	0.05	0.05	0.05	0.05	0.07	0.04	0.08	0.06	0.05	0.12	0.08	0.14	0.08	0.16	0.18	0.08	0.11	0.04	0.05	0.05	0.05	0.05	0.04	0.04	0.04	0.05	0.05	0.04	0.06	0.05	0.04	0.08	0.05	0.05	0.06	0.52	0.05	0.05	0.23	0.07	0.04
cg08016383	ADAMTS17	Pure Island	Within	0.07	0.08	0.04	0.03	0.04	0.03	0.03	0.04	0.03	0.02	0.04	0.04	0.05	0.36	0.4	0.05	0.07	0.05	0.11	0.08	0.89	0.43	0.05	0.11	0.15	0.04	0.03	0.29	0.03	0.03	0.03	0.04	0.84	0.04	0.03	0.54	0.08	0.77	0.64	0.06	0.28	0.04	0.02	0.08	0.09	0.53
cg08045570	FOXF2	Pure Island	Within	0.06	0.05	0.05	0.03	0.03	0.02	0.03	0.03	0.04	0.02	0.02	0.13	0.97	0.05	0.15	0.96	0.13	0.74	0.38	0.34	0.93	0.95	0.39	0.02	0.07	0.97	0.03	0.34	0.04	0.08	0.03	0.32	0.1	0.09	0.98	0.47	0.93	0.97	0.96	0.86	0.96	0.17	0.97	0.92	0.62	0.95
cg08047457	RASSF1	Pure Island	Within	0.07	0.03	0.02	0.02	0.03	0.05	0.05	0.05	0.05	0.03	0.06	0.97	0.02	0.58	0.96	0.95	0.94	0.96	0.05	0.03	0.94	0.98	0.83	0.98	0.99	0.97	0.98	0.98	0.99	0.96	0.02	0.98	0.99	0.98	0.02	0.54	0.03	0.95	0.99	0.66	0.98	0.36	0.02	0.05	0.94	0.95
cg08056146	SOX7	Pure Island	Within	0.08	0.06	0.04	0.05	0.04	0.11	0.04	0.03	0.03	0.02	0.03	0.94	0.96	0.03	0.63	0.95	0.07	0.92	0.5	0.56	0.94	0.95	0.38	0.03	0.6	0.97	0.04	0.03	0.02	0.03	0.04	0.03	0.84	0.03	0.97	0.91	0.91	0.14	0.57	0.03	0.97	0.95	0.81	0.96	0.95	0.03
cg08080029	CHD5	Pure Island	Within	0.11	NA	0.06	0.18	0.08	0.05	0.06	0.06	0.05	0.05	0.04	0.09	0.89	0.52	0.68	0.1	0.12	0.07	0.17	0.2	0.96	0.96	0.24	0.04	0.05	0.04	0.11	0.04	0.03	0.04	0.07	0.05	0.23	0.12	0.99	0.1	0.69	0.54	0.98	0.25	0.05	0.08	0.33	0.06	0.96	0.04
cg08081036	ANXA2	Pure Island	Within	0.09	0.12	0.09	0.07	0.08	0.09	0.09	0.1	0.07	0.05	0.06	0.08	0.08	0.07	0.09	0.09	0.11	0.08	0.1	0.14	0.08	0.08	0.08	0.09	0.09	0.08	0.05	0.08	0.07	0.09	0.08	0.08	0.6	0.7	0.11	0.08	0.1	0.07	0.08	0.08	0.07	0.08	0.09	0.18	0.1	0.08
cg08090772	ADHFE1	Pure Island	Within	0.07	0.07	0.05	0.07	0.05	0.05	0.06	0.04	0.06	0.06	0.04	0.38	0.05	0.06	0.34	0.24	0.08	0.06	0.82	0.77	0.8	0.89	0.04	0.89	0.49	0.91	0.88	0.32	0.56	0.05	0.27	0.05	0.93	0.88	0.91	0.92	0.83	0.94	0.95	0.87	0.89	0.06	0.04	0.87	0.12	0.04
cg08097755	VGF	Pure Island	Within	0.14	0.13	0.08	0.07	0.07	0.06	0.06	0.06	0.06	0.08	0.09	0.08	0.83	0.07	0.4	0.06	0.37	0.07	0.07	0.15	0.3	0.08	0.12	0.03	0.34	0.03	0.04	0.2	0.15	0.11	0.23	0.1	0.03	0.05	0.83	0.34	0.18	0.07	0.76	0.55	0.24	0.04	0.76	0.32	0.8	0.62
cg08097882	POU4F1	Pure Island	Within	0.05	0.05	0.04	0.02	0.06	0.06	0.07	0.13	0.06	0.03	0.08	0.97	0.05	0.97	0.91	0.92	0.07	0.9	0.57	0.19	0.91	0.93	0.05	0.02	0.03	0.94	0.05	0.03	0.02	0.48	0.03	0.48	0.02	0.04	0.98	0.97	0.94	0.03	0.98	0.95	0.97	0.96	0.96	0.94	0.9	0.2
cg08118311	SALL3	Pure Island	Within	0.1	0.05	0.03	0.01	0.05	0.04	0.05	0.06	0.06	0.03	0.22	0.97	0.97	0.91	0.46	0.95	0.91	0.84	0.95	0.87	0.96	0.97	0.13	0.47	0.93	0.96	0.04	0.28	0.01	0.92	0.97	0.97	0.86	0.97	0.97	0.97	0.95	0.96	0.95	0.95	0.97	0.95	0.95	0.93	0.87	0.92
cg08122545	HES4	Pure Island	Within	0.24	0.15	0.08	0.05	0.04	0.05	0.05	0.05	0.05	0.08	0.08	0.73	0.13	0.18	0.47	0.13	0.12	0.09	0.11	0.14	0.14	0.14	0.02	0.03	0.05	0.03	0.04	0.05	0.18	0.03	0.03	0.03	0.52	0.1	0.03	0.04	0.08	0.05	0.7	0.1	0.57	0.05	0.07	0.09	0.17	0.04
cg08132931	ADD2	Pure Island	Within	0.09	0.07	0.06	0.04	0.04	0.04	0.04	0.04	0.03	0.03	0.04	0.67	0.96	0.2	0.18	0.73	0.12	0.18	0.85	0.94	0.93	0.94	0.11	0.03	0.03	0.63	0.03	0.04	0.03	0.03	0.04	0.04	0.03	0.59	0.22	0.95	0.76	0.72	0.93	0.61	0.42	0.1	0.63	0.9	0.19	0.04
cg08145177	ABHD8	Pure Island	Within	0.25	0.23	0.23	0.14	0.1	0.13	0.09	0.1	0.09	0.03	0.11	0.06	0.05	0.75	0.92	0.81	0.39	0.07	0.8	0.58	0.92	0.5	0.35	0.92	0.55	0.9	0.52	0.57	0.51	0.87	0.58	0.93	0.07	0.13	0.91	0.94	0.66	0.69	0.92	0.93	0.91	0.27	0.14	0.79	0.39	0.19
cg08145590	C3orf15	Pure Island	Within	0.07	0.07	0.03	0.12	0.03	0.02	0.02	0.02	0.02	0.03	0.04	0.94	0.97	0.18	0.8	0.47	0.95	0.4	0.92	0.95	0.94	0.94	0.14	0.03	0.98	0.96	0.38	0.28	0.16	0.26	0.02	0.97	0.98	0.96	0.96	0.94	0.94	0.97	0.96	0.36	0.97	0.05	0.03	0.86	0.05	0.09
cg08157579	SERHL2	Pure Island	Within	0.11	0.11	0.07	0.1	0.07	0.08	0.06	0.07	0.08	0.06	0.06	0.43	0.09	0.06	0.17	0.1	0.11	0.1	0.15	0.16	0.28	0.82	0.03	0.04	0.04	0.05	0.04	0.04	0.05	0.04	0.04	0.09	0.22	0.06	0.26	0.05	0.18	0.74	0.58	0.11	0.57	0.06	0.05	0.57	0.1	0.05
cg08158331	CAPG	Pure Island	Within	0.12	0.07	0.19	0.05	0.05	0.07	0.06	0.06	0.06	0.06	0.06	0.07	0.09	0.07	0.13	0.1	0.16	0.06	0.08	0.08	0.06	0.06	0.07	0.05	0.05	0.06	0.09	0.06	0.06	0.05	0.06	0.06	0.04	0.05	0.22	0.17	0.1	0.16	0.1	0.57	0.12	0.14	0.24	0.12	0.09	0.04
cg08170622	CCND1	Pure Island	Within	0.03	0.04	0.03	0.14	0.04	0.05	0.04	0.05	0.04	0.03	0.04	0.03	0.02	0.05	0.05	0.05	0.05	0.03	0.05	0.03	0.03	0.04	0.02	0.01	0.02	0.03	0.02	0.02	0.01	0.02	0.03	0.02	0.04	0.03	0.02	0.04	0.05	0.04	0.03	0.03	0.03	0.05	0.02	0.07	0.08	0.05
cg08185241	G0S2	Pure Island	Within	0.15	0.07	0.06	0.04	0.09	0.04	0.07	0.04	0.05	0.03	0.02	0.66	0.94	0.95	0.94	0.94	0.95	0.08	0.45	0.27	0.91	0.48	0.17	0.02	0.97	0.97	0.05	0.27	0.78	0.03	0.02	0.76	0.02	0.07	0.42	0.98	0.04	0.03	0.81	0.92	0.65	0.03	0.05	0.95	0.05	0.03
cg08185661	SYT9	Pure Island	Within	0.06	0.1	0.1	0.01	0.04	0.07	0.04	0.05	0.06	0.02	0.05	0.03	0.98	0.54	0.48	0.06	0.72	0.06	0.88	0.79	0.94	0.96	0.84	0.21	0.03	0.12	0.47	0.55	0.01	0.27	0.09	0.56	0.24	0.01	0.96	0.9	0.9	0.96	0.96	0.81	0.98	0.03	0.4	0.82	0.8	0.6
cg08190044	ATP8B2	Pure Island	Within	0.08	0.09	0.06	0.12	0.13	0.15	0.12	0.09	0.1	0.12	0.06	0.13	0.09	0.2	0.08	0.43	0.68	0.4	0.83	0.65	0.83	0.85	0.09	0.03	0.04	0.34	0.04	0.03	0.08	0.06	0.1	0.03	0.19	0.32	0.85	0.94	0.91	0.69	0.87	0.78	0.06	0.07	0.61	0.09	0.45	0.18
cg08190291	ADAMTS5	Pure Island	Within	0.07	0.06	0.04	0.14	0.04	0.04	0.03	0.03	0.04	0.03	0.03	0.46	0.04	0.15	0.55	0.5	0.18	0.07	0.9	0.75	0.57	0.9	0.28	0.04	0.29	0.38	0.02	0.41	0.03	0.5	0.04	0.88	0.12	0.04	0.96	0.54	0.94	0.91	0.91	0.95	0.94	0.04	0.84	0.92	0.52	0.79
cg08228917	LHFP	Pure Island	Within	0.17	0.16	0.09	0.17	0.05	0.05	0.05	0.06	0.05	0.06	0.04	0.1	0.08	0.05	0.2	0.1	0.17	0.13	0.11	0.26	0.52	0.96	0.03	0.03	0.03	0.04	0.04	0.03	0.03	0.03	0.03	0.03	0.04	0.03	0.8	0.04	0.93	0.04	0.06	0.93	0.03	0.05	0.97	0.35	0.1	0.04
cg08244522	THBD	Pure Island	Within	0.05	0.04	0.06	0.04	0.04	0.05	0.04	0.03	0.04	0.03	0.04	0.11	0.05	0.04	0.47	0.43	0.62	0.04	0.74	0.19	0.59	0.94	0.31	0.93	0.07	0.34	0.03	0.02	0.03	0.03	0.03	0.1	0.11	0.88	0.92	0.43	0.84	0.96	0.97	0.04	0.26	0.04	0.03	0.07	0.05	0.04
cg08250444	EFNA1	Pure Island	Within	0.06	0.06	0.04	0.03	0.04	0.03	0.04	0.04	0.03	0.05	0.02	0.04	0.04	0.02	0.28	0.04	0.06	0.04	0.12	0.06	0.08	0.39	0.02	0.02	0.02	0.02	0.02	0.02	0.02	0.02	0.02	0.03	0.04	0.04	0.02	0.03	0.07	0.02	0.03	0.02	0.03	0.03	0.06	0.05	0.06	0.03
cg08269321	RPRML	Pure Island	Within	0.13	0.12	0.06	0.05	0.04	0.04	0.04	0.05	0.04	0.04	0.05	0.71	0.08	0.08	0.23	0.37	0.09	0.53	0.2	0.16	0.84	0.84	0.17	0.03	0.11	0.28	0.04	0.08	0.03	0.05	0.04	0.09	0.07	0.24	0.89	0.57	0.81	0.35	0.08	0.69	0.38	0.08	0.54	0.75	0.72	0.14
cg08290212	BSCL2	Pure Island	Within	0.16	0.16	0.07	0.03	0.04	0.03	0.03	0.04	0.03	0.05	0.04	0.93	0.05	0.04	0.19	0.09	0.1	0.08	0.12	0.12	0.16	0.15	0.02	0.03	0.02	0.03	0.04	0.02	0.02	0.02	0.03	0.03	0.03	0.03	0.03	0.03	0.06	0.22	0.04	0.03	0.04	0.05	0.03	0.1	0.09	0.05
cg08296824	OSBPL3	Pure Island	Within	0.07	0.07	0.06	0.05	0.05	0.05	0.06	0.06	0.05	0.04	0.04	0.06	0.06	0.06	0.1	0.7	0.08	0.07	0.14	0.08	0.05	0.07	0.04	0.04	0.04	0.8	0.03	0.04	0.04	0.04	0.05	0.04	0.03	0.04	0.03	0.03	0.06	0.04	0.04	0.05	0.05	0.05	0.06	0.14	0.08	0.05
cg08303146	KCNQ1	Pure Island	Within	0.1	0.08	0.08	0.02	0.03	0.03	0.07	0.03	0.03	0.03	0.1	0.5	0.63	0.52	0.89	0.06	0.08	0.91	0.14	0.16	0.1	0.08	0.42	0.02	0.22	0.07	0.13	0.35	0.04	0.08	0.07	0.93	0.72	0.02	0.02	0.02	0.06	0.7	0.03	0.15	0.14	0.09	0.03	0.12	0.24	0.07
cg08307816	DEGS2	Pure Island	Within	0.09	0.12	0.08	0.02	0.03	0.03	0.04	0.04	0.03	0.03	0.12	0.89	0.44	0.79	0.61	0.05	0.08	0.05	0.22	0.36	0.18	0.86	0.13	0.03	0.05	0.03	0.02	0.15	0.03	0.73	0.05	0.95	0.05	0.05	0.04	0.4	0.04	0.27	0.84	0.91	0.96	0.05	0.04	0.78	0.89	0.19
cg08319991	UCHL1	Pure Island	Within	0.18	0.16	0.08	0.05	0.04	0.03	0.03	0.05	0.03	0.03	0.06	0.75	0.63	0.2	0.62	0.84	0.23	0.17	0.78	0.56	0.82	0.88	0.04	0.03	0.03	0.87	0.05	0.08	0.03	0.02	0.03	0.04	0.02	0.04	0.92	0.86	0.88	0.05	0.94	0.92	0.93	0.68	0.89	0.81	0.63	0.04
cg08321346	ANKMY1	Pure Island	Within	0.11	0.05	0.06	0.19	0.03	0.04	0.06	0.02	0.03	0.01	0.19	0.49	0.95	0.05	0.93	0.09	0.92	0.02	0.94	0.23	0.24	0.96	0.18	0.02	0.97	0.74	0.83	0.33	0.52	0.03	0.02	0.97	0.98	0.97	0.62	0.98	0.92	0.98	0.97	0.56	0.97	0.06	0.21	0.76	0.93	0.03
cg08348496	HAPLN3	Pure Island	Within	0.05	0.05	0.03	0.07	0.03	0.04	0.03	0.04	0.03	0.05	0.02	0.02	0.06	0.11	0.09	0.88	0.07	0.89	0.57	0.43	0.35	0.88	0.27	0.02	0.03	0.95	0.04	0.02	0.34	0.41	0.03	0.87	0.96	0.42	0.28	0.18	0.07	0.96	0.94	0.06	0.96	0.03	0.02	0.11	0.14	0.03
cg08349573	C1QTNF1	Pure Island	Within	0.1	0.1	0.05	0.02	0.02	0.03	0.03	0.02	0.02	0.03	0.04	0.83	0.04	0.21	0.62	0.47	0.88	0.07	0.09	0.09	0.4	0.09	0.37	0.02	0.02	0.48	0.02	0.02	0.02	0.44	0.07	0.96	0.01	0.02	0.33	0.73	0.07	0.02	0.02	0.44	0.96	0.04	0.02	0.31	0.16	0.27
cg08361238	PTGFRN	Pure Island	Within	0.06	0.21	0.23	0.25	0.03	0.04	0.03	0.06	0.03	0.01	0.11	0.14	0.9	0.3	0.53	0.48	0.57	0.08	0.23	0.25	0.08	0.11	0.75	0.82	0.17	0.53	0.31	0.78	0.35	0.2	0.12	0.49	0.8	0.17	0.12	0.39	0.28	0.2	0.38	0.29	0.81	0.21	0.18	0.26	0.5	0.15
cg08370996	NR2F2	Pure Island	Within	0.06	0.06	0.06	0.1	0.04	0.04	0.03	0.04	0.03	0.03	0.04	0.05	0.48	0.06	0.06	0.07	0.08	0.05	0.08	0.07	0.08	0.09	0.05	0.33	0.06	0.05	0.03	0.04	0.04	0.05	0.04	0.05	0.04	0.04	0.04	0.05	0.07	0.06	0.04	0.05	0.06	0.06	0.05	0.06	0.05	0.04
cg08383315	RIC3	Pure Island	Within	0.08	0.08	0.05	0.04	0.03	0.03	0.03	0.03	0.03	0.03	0.05	0.07	0.95	0.14	0.25	0.73	0.44	0.06	0.85	0.9	0.89	0.93	0.3	0.02	0.22	0.81	0.68	0.28	0.02	0.03	0.11	0.44	0.03	0.65	0.95	0.39	0.73	0.76	0.96	0.95	0.96	0.14	0.74	0.86	0.47	0.09
cg08390021	C18orf54	Associated Island	Within	0.06	0.06	0.05	0.01	0.02	0.02	0.02	0.03	0.02	0.01	0.06	0.03	0.04	0.06	0.1	0.07	0.08	0.03	0.13	0.07	0.92	0.07	0.02	0.02	0.03	0.03	0.04	0.03	0.02	0.02	0.02	0.02	0.02	0.04	0.03	0.07	0.04	0.05	0.05	0.84	0.05	0.04	0.06	0.32	0.05	0.02
cg08404227	SLCO3A1	Pure Island	Within	0.08	0.07	0.03	0.03	0.02	0.03	0.03	0.04	0.04	0.02	0.03	0.05	0.11	0.04	0.07	0.05	0.08	0.05	0.1	0.06	0.37	0.07	0.29	0.03	0.03	0.04	0.11	0.15	0.02	0.13	0.05	0.03	0.03	0.04	0.04	0.12	0.07	0.72	0.93	0.05	0.93	0.04	0.03	0.59	0.09	0.13
cg08419026	SLCO5A1	Pure Island	Within	0.05	0.08	0.05	0.03	0.05	0.06	0.05	0.06	0.05	0.11	0.04	0.04	0.04	0.34	0.08	0.08	0.3	0.05	0.26	0.09	0.06	0.06	0.03	0.02	0.02	0.04	0.04	0.03	0.02	0.03	0.03	0.03	0.04	0.03	0.04	0.04	0.07	0.53	0.67	0.16	0.05	0.04	0.16	0.14	0.07	0.05
cg08422599	KCNIP1	Associated Island	Within	0.07	0.06	0.05	0.03	0.04	0.04	0.04	0.04	0.05	0.02	0.23	0.11	0.04	0.39	0.47	0.89	0.36	0.41	0.88	0.88	0.85	0.91	0.6	0.02	0.53	0.93	0.36	0.67	0.03	0.04	0.17	0.52	0.18	0.05	0.93	0.94	0.93	0.96	0.91	0.94	0.89	0.05	0.9	0.88	0.78	0.29
cg08434234	DGKI	Pure Island	Within	0.12	0.15	0.1	0.08	0.06	0.07	0.04	0.06	0.05	0.06	0.03	0.09	0.17	0.4	0.92	0.64	0.59	0.79	0.85	0.87	0.92	0.93	0.44	0.02	0.6	0.93	0.07	0.3	0.02	0.32	0.03	0.44	0.03	0.03	0.95	0.96	0.84	0.95	0.9	0.89	0.95	0.04	0.89	0.81	0.91	0.32
cg08441170	MYO3A	Pure Island	Within	0.09	0.11	0.09	0.05	0.09	0.08	0.1	0.1	0.12	0.05	0.22	0.05	0.99	0.77	0.55	0.94	0.89	0.91	0.89	0.95	0.97	0.99	0.99	0.02	0.51	0.98	0.6	0.54	0.02	0.43	0.4	0.97	0.82	0.93	0.98	0.97	0.97	0.99	0.99	0.98	0.99	0.07	0.97	0.93	0.28	0.23
cg08453021	ELMO1	Pure Island	Within	0.05	0.07	0.05	0.03	0.06	0.04	0.05	0.05	0.06	0.02	0.18	0.34	0.04	0.56	0.43	0.07	0.68	0.38	0.8	0.28	0.87	0.85	0.3	0.06	0.04	0.05	0.03	0.42	0.04	0.04	0.06	0.05	0.17	0.48	0.89	0.92	0.83	0.76	0.82	0.89	0.92	0.61	0.83	0.82	0.83	0.1
cg08465862	PFKP	Pure Island	Within	0.18	0.13	0.08	0.15	0.05	0.05	0.04	0.04	0.05	0.07	0.17	0.17	0.47	0.23	0.68	0.15	0.13	0.08	0.17	0.22	0.14	0.27	0.03	0.02	0.03	0.04	0.11	0.03	0.04	0.03	0.03	0.2	0.07	0.04	0.08	0.38	0.08	0.04	0.07	0.06	0.21	0.06	0.06	0.08	0.07	0.03
cg08491025	SLC16A1	Pure Island	Within	0.11	0.1	0.05	0.02	0.03	0.03	0.03	0.03	0.02	0.03	0.02	0.06	0.04	0.04	0.13	0.06	0.07	0.07	0.09	0.11	0.11	0.08	0.02	0.01	0.01	0.02	0.02	0.01	0.02	0.01	0.02	0.02	0.03	0.02	0.03	0.04	0.04	0.03	0.02	0.03	0.02	0.07	0.01	0.04	0.77	0.02
cg08504049	ZNF264	Pure Island	Within	0.15	0.12	0.1	0.22	0.11	0.12	0.13	0.11	0.12	0.1	0.06	0.09	0.11	0.09	0.14	0.6	0.14	0.12	0.81	0.65	0.38	0.09	0.07	0.08	0.25	0.79	0.11	0.08	0.07	0.08	0.09	0.07	0.41	0.06	0.09	0.22	0.45	0.18	0.8	0.07	0.08	0.1	0.07	0.11	0.12	0.11
cg08535373	SLC32A1	Pure Island	Within	0.08	0.1	0.07	0.1	0.07	0.08	0.09	0.08	0.08	0.12	0.09	0.1	0.82	0.46	0.34	0.72	0.58	0.27	0.79	0.71	0.56	0.78	0.39	0.05	0.08	0.8	0.55	0.45	0.32	0.43	0.22	0.62	0.29	0.19	0.53	0.39	0.73	0.57	0.58	0.89	0.77	0.43	0.68	0.65	0.68	0.43
cg08537652	PRDM16	Pure Island	Within	0.09	0.08	0.06	0.24	0.06	0.05	0.05	0.06	0.07	0.06	0.05	0.08	0.94	0.76	0.1	0.11	0.18	0.06	0.06	0.1	0.04	0.05	0.05	0.03	0.03	0.04	0.07	0.02	0.02	0.03	0.04	0.03	0.1	0.04	0.04	0.4	0.77	0.06	0.08	0.07	0.05	0.07	0.04	0.06	0.07	0.39
cg08550026	NAV2	Pure Island	Within	0.1	0.08	0.12	0.04	0.05	0.05	0.05	0.05	0.05	0.04	0.08	0.07	0.92	0.07	0.1	0.12	0.09	0.07	0.09	0.08	0.31	0.08	0.05	0.15	0.06	0.07	0.06	0.05	0.11	0.11	0.06	0.11	0.06	0.06	0.11	0.18	0.29	0.31	0.16	0.1	0.49	0.12	0.05	0.37	0.1	0.05
cg08551857	PAG1	Pure Island	Within	0.07	0.11	0.07	0.03	0.04	0.04	0.04	0.05	0.05	0.02	0.02	0.07	0.06	0.1	0.15	0.08	0.12	0.09	0.12	0.16	0.11	0.18	0.07	0.03	0.03	0.03	0.02	0.17	0.02	0.03	0.03	0.03	0.02	0.03	0.04	0.03	0.05	0.03	0.04	0.06	0.12	0.04	0.04	0.08	0.08	0.03
cg08555772	ARMC4	Pure Island	Within	0.09	0.1	0.06	0.04	0.04	0.06	0.05	0.05	0.04	0.03	0.05	0.06	0.95	0.26	0.09	0.21	0.19	0.06	0.86	0.8	0.92	0.93	0.04	0.36	0.05	0.53	0.05	0.05	0.04	0.04	0.05	0.04	0.04	0.07	0.9	0.91	0.79	0.6	0.89	0.07	0.44	0.3	0.3	0.31	0.06	0.23
cg08558873	ZNF214	Pure Island	Within	0.02	0.03	0.02	0.03	0.03	0.04	0.03	0.04	0.04	0.04	0.05	0.03	0.89	0.05	0.05	0.59	0.63	0.03	0.05	0.02	0.02	0.03	0.07	0.02	0.17	0.62	0.02	0.01	0.02	0.01	0.02	0.01	0.07	0.02	0.01	0.03	0.02	0.04	0.23	0.05	0.09	0.03	0.01	0.12	0.03	0.03
cg08568512	FHOD3	Pure Island	Within	0.04	0.03	0.03	0.02	0.04	0.03	0.03	0.03	0.02	0.01	0.02	0.91	0.02	0.02	0.02	0.03	0.26	0.05	0.09	0.03	0.95	0.95	0.01	0.01	0.01	0.02	0.02	0.01	0.01	0.01	0.02	0.01	0.01	0.01	0.99	0.04	0.22	0.26	0.06	0.02	0.22	0.03	0.04	0.13	0.04	0.02
cg08583049	FOXB1	Pure Island	Within	0.03	0.05	0.04	0.05	0.03	0.03	0.02	0.03	0.03	0.02	0.04	0.89	0.27	0.86	0.47	0.75	0.04	0.7	0.67	0.52	0.63	0.58	0.04	0.02	0.1	0.82	0.02	0.03	0.01	0.02	0.9	0.07	0.05	0.02	0.92	0.8	0.84	0.8	0.83	0.92	0.88	0.09	0.93	0.66	0.85	0.74
cg08592761	LARP6	Pure Island	Within	0.08	0.08	0.07	0.04	0.04	0.04	0.03	0.04	0.04	0.03	0.03	0.07	0.94	0.04	0.09	0.23	0.07	0.08	0.1	0.12	0.92	0.93	0.11	0.03	0.02	0.05	0.04	0.03	0.02	0.03	0.03	0.02	0.03	0.05	0.54	0.03	0.52	0.03	0.95	0.47	0.04	0.04	0.03	0.11	0.07	0.04
cg08606356	CD44	Pure Island	Within	0.12	0.07	0.07	0.17	0.1	0.11	0.09	0.11	0.1	0.08	0.06	0.07	0.06	0.06	0.06	0.1	0.06	0.08	0.1	0.1	0.1	0.45	0.05	0.04	0.04	0.52	0.09	0.04	0.04	0.06	0.07	0.06	0.31	0.06	0.05	0.04	0.09	0.05	0.05	0.05	0.05	0.06	0.05	0.1	0.13	0.08
cg08607082	ICAM1	Pure Island	Within	0.06	0.05	0.06	0.04	0.04	0.07	0.07	0.05	0.08	0.1	0.15	0.81	0.03	0.16	0.46	0.05	0.04	0.04	0.33	0.72	0.68	0.03	0.05	0.2	0.77	0.08	0.18	0.33	0.32	0.25	0.08	0.11	0.11	0.72	0.16	0.95	0.06	0.03	0.02	0.05	0.95	0.06	0.07	0.46	0.1	0.04
cg08610361	E2F7	Pure Island	Within	0.07	0.05	0.06	0.19	0.04	0.04	0.03	0.04	0.03	0.03	0.09	0.07	0.06	0.12	0.07	0.11	0.06	0.06	0.09	0.08	0.08	0.13	0.02	0.03	0.04	0.04	0.03	0.03	0.03	0.03	0.03	0.03	0.03	0.04	0.08	0.09	0.1	0.11	0.06	0.08	0.05	0.09	0.13	0.09	0.06	0.03
cg08612037	BTBD11	Pure Island	Within	0.13	0.13	0.09	0.07	0.05	0.05	0.05	0.06	0.05	0.06	0.03	0.56	0.41	0.05	0.22	0.11	0.84	0.09	0.12	0.17	0.11	0.12	0.2	0.04	0.04	0.05	0.03	0.06	0.03	0.03	0.05	0.05	0.09	0.04	0.05	0.05	0.14	0.16	0.05	0.04	0.29	0.24	0.03	0.1	0.49	0.05
cg08614481	HTR1B	Pure Island	Within	0.14	0.12	0.1	0.09	0.05	0.05	0.06	0.06	0.06	0.08	0.21	0.73	0.45	0.64	0.52	0.82	0.3	0.23	0.65	0.65	0.8	0.8	0.34	0.26	0.47	0.87	0.71	0.27	0.1	0.18	0.09	0.84	0.8	0.35	0.87	0.79	0.56	0.89	0.76	0.28	0.88	0.11	0.05	0.79	0.69	0.64
cg08617916	RASSF5	Pure Island	Within	0.03	0.03	0.02	0.02	0.05	0.06	0.06	0.08	0.06	0.03	0.05	0.02	0.02	0.05	0.03	0.05	0.06	0.05	0.04	0.03	0.03	0.32	0.02	0.02	0.02	0.04	0.01	0.02	0.02	0.02	0.03	0.02	0.07	0.02	0.02	0.22	0.05	0.2	0.02	0.03	0.03	0.03	0.02	0.33	0.07	0.06
cg08623947	HCK	Pure Island	Within	0.04	0.03	0.03	0.03	0.05	0.06	0.04	0.06	0.04	0.02	0.05	0.73	0.03	0.09	0.06	0.29	0.05	0.45	0.4	0.09	0.65	0.94	0.66	0.5	0.09	0.91	0.3	0.14	0.06	0.03	0.04	0.17	0.6	0.02	0.74	0.25	0.59	0.82	0.95	0.1	0.97	0.03	0.24	0.94	0.37	0.34
cg08643928	RALGPS2	Pure Island	Within	0.07	0.05	0.04	0.02	0.03	0.03	0.02	0.02	0.02	0.01	0.01	0.03	0.02	0.02	0.09	0.04	0.04	0.04	0.06	0.07	0.07	0.05	0.01	0.01	0.02	0.02	0.03	0.01	0.01	0.01	0.02	0.01	0.01	0.02	0.02	0.02	0.03	0.02	0.02	0.01	0.03	0.02	0.02	0.11	0.03	0.01
cg08661227	TAGLN2	Pure Island	Within	0.03	0.02	0.01	0.04	0.02	0.02	0.02	0.02	0.02	0.03	0.02	0.02	0.02	0.01	0.03	0.02	0.03	0.02	0.04	0.03	0.03	0.03	0.01	0.97	0.01	0.01	0.01	0.01	0.01	0.01	0.01	0.01	0.02	0.01	0.01	0.01	0.02	0.01	0.01	0.03	0.01	0.02	0.02	0.03	0.04	0.02
cg08696890	CPNE2	Pure Island	Within	0.08	0.06	0.06	0.03	0.04	0.03	0.03	0.03	0.03	0.02	0.03	0.04	0.04	0.03	0.11	0.05	0.08	0.06	0.15	0.08	0.07	0.07	0.02	0.03	0.03	0.03	0.04	0.02	0.06	0.03	0.02	0.04	0.04	0.04	0.03	0.04	0.06	0.03	0.04	0.05	0.03	0.04	0.03	0.06	0.06	0.03
cg08713365	NRSN2	Pure Island	Within	0.09	0.14	0.09	NA	0.06	0.07	0.05	0.05	0.07	0.09	0.15	0.23	0.95	0.4	0.57	0.08	0.06	0.04	0.11	0.08	0.55	0.96	0.05	0.04	0.04	0.06	0.1	0.07	0.06	0.04	0.66	0.88	0.19	0.05	0.03	0.91	0.09	0.05	0.86	0.41	0.06	0.1	0.89	0.91	0.06	0.03
cg08715837	TUBA8	Pure Island	Within	0.05	0.1	0.1	0.07	0.09	0.13	0.09	0.08	0.07	0.11	0.09	0.93	0.04	0.05	0.79	0.06	0.05	0.06	0.13	0.08	0.21	0.05	0.61	0.02	0.97	0.06	0.05	0.36	0.03	0.48	0.05	0.96	0.05	0.92	0.06	0.97	0.08	0.6	0.06	0.08	0.96	0.07	0.07	0.87	0.24	0.04
cg08725962	ARL10	Pure Island	Within	0.04	0.06	0.03	0.02	0.02	0.08	0.02	0.02	0.03	0.01	0.09	0.03	0.02	0.63	0.48	0.96	0.56	0.71	0.48	0.04	0.95	0.97	0.68	0.01	0.99	0.98	0.62	0.7	0.01	0.57	0.02	0.99	0.01	0.58	0.59	0.8	0.49	0.77	0.99	0.38	0.99	0.02	0.92	0.94	0.08	0.03
cg08731300	FZD8	Pure Island	Within	0.08	0.08	0.05	0.02	0.04	0.04	0.04	0.04	0.03	0.02	0.04	0.06	0.05	0.05	0.1	0.08	0.52	0.06	0.1	0.19	0.46	0.57	0.03	0.03	0.05	0.04	0.02	0.3	0.03	0.03	0.03	0.06	0.13	0.03	0.04	0.03	0.2	0.08	0.32	0.13	0.04	0.04	0.05	0.59	0.06	0.04
cg08770869	CDC25B	Pure Island	Within	0.12	0.09	0.09	0.03	0.04	0.04	0.03	0.03	0.03	0.02	0.07	0.05	0.07	0.08	0.24	0.08	0.09	0.06	0.43	0.14	0.92	0.09	0.04	0.36	0.02	0.06	0.04	0.02	0.44	0.03	0.04	0.03	0.02	0.04	0.87	0.94	0.09	0.6	0.11	0.36	0.11	0.11	0.24	0.08	0.04	0.03
cg08785534	GAL	Pure Island	Within	0.15	0.13	0.08	0.16	0.08	0.07	0.07	0.07	0.06	0.07	0.08	0.28	0.13	0.39	0.14	0.37	0.12	0.08	0.16	0.11	0.86	0.65	0.2	0.06	0.1	0.35	0.08	0.16	0.07	0.05	0.07	0.11	0.2	0.06	0.62	0.08	0.22	0.29	0.08	0.17	0.09	0.07	0.07	0.15	0.54	0.11
cg08788717	STK33	Pure Island	Within	0.05	0.08	0.06	0.01	0.06	0.03	0.04	0.04	0.03	0.02	0.05	0.03	0.07	0.84	0.06	0.92	0.86	0.79	0.44	0.63	0.96	0.97	0.42	0.02	0.21	0.97	0.97	0.04	0.02	0.02	0.12	0.02	0.02	0.03	0.96	0.5	0.94	0.72	0.97	0.97	0.98	0.05	0.04	0.15	0.05	0.03
cg08789908	HSD11B2	Pure Island	Within	0.08	0.08	0.07	0.07	0.08	0.08	0.08	0.08	0.1	0.08	0.08	0.81	0.06	0.08	0.14	0.1	0.08	0.08	0.1	0.06	0.07	0.06	0.06	0.05	0.07	0.06	0.07	0.06	0.06	0.07	0.05	0.11	0.08	0.12	0.06	0.09	0.1	0.06	0.07	0.09	0.75	0.07	0.06	0.06	0.11	0.06
cg08797471	DAPK1	Associated Island	Within	0.12	0.08	0.11	0.05	0.14	0.13	0.16	0.14	0.15	0.04	0.2	0.76	0.09	0.13	0.22	0.59	0.11	0.46	0.88	0.75	0.09	0.58	0.56	0.05	0.05	0.74	0.07	0.09	0.05	0.06	0.61	0.06	0.15	0.31	0.09	0.11	0.16	0.09	0.08	0.09	0.67	0.09	0.07	0.25	0.28	0.13
cg08806153	HOXD11	Pure Island	Within	0.03	0.04	0.03	0.07	0.04	0.03	0.03	0.03	0.06	0.03	0.08	0.93	0.96	0.49	0.09	0.14	0.23	0.04	0.05	0.06	0.88	NA	0.03	0.02	0.02	0.53	0.03	0.02	0.01	0.08	0.02	0.09	0.03	0.02	0.52	0.92	0.25	0.86	0.08	0.96	0.94	0.2	0.87	0.11	0.86	0.04
cg08815652	UACA	Pure Island	Within	0.07	0.08	0.06	0.05	0.07	0.07	0.07	0.08	0.07	0.03	0.06	0.06	0.86	0.06	0.08	0.09	0.09	0.07	0.15	0.09	0.08	0.1	0.06	0.06	0.06	0.06	0.05	0.06	0.05	0.05	0.06	0.05	0.05	0.04	0.05	0.05	0.07	0.06	0.05	0.05	0.05	0.06	0.05	0.09	0.1	0.06
cg08847533	NEK9	Pure Island	Within	0.17	0.1	0.05	0.03	0.04	0.06	0.04	0.04	0.03	0.05	0.02	0.05	0.05	0.03	0.21	0.82	0.49	0.08	0.09	0.11	0.12	0.09	0.02	0.02	0.02	0.96	0.03	0.65	0.02	0.02	0.03	0.02	0.03	0.08	0.02	0.04	0.07	0.02	0.04	0.04	0.03	0.08	0.02	0.06	0.1	0.03
cg08853659	CLSTN2	Pure Island	Within	0.12	0.11	0.05	0.08	0.05	0.04	0.05	0.04	0.05	0.05	0.04	0.53	0.04	0.09	0.19	0.07	0.11	0.07	0.09	0.16	0.96	0.93	0.1	0.02	0.02	0.02	0.03	0.29	0.02	0.02	0.03	0.05	0.05	0.02	0.98	0.89	0.95	0.02	0.96	0.95	0.98	0.03	0.33	0.86	0.81	0.46
cg08876932	PHOX2A	Pure Island	Within	0.05	0.07	0.08	0.04	0.02	0.03	0.03	0.04	0.08	0.03	0.04	0.95	0.97	0.78	0.93	0.95	0.94	0.93	0.93	0.95	0.96	0.96	0.95	0.98	0.98	0.98	0.63	0.5	0.49	0.9	0.23	0.98	0.99	0.92	0.97	0.97	0.96	0.97	0.97	0.98	0.98	0.92	0.98	0.94	0.9	0.97
cg08893585	BARX2	Pure Island	Within	0.11	0.17	0.16	0.11	0.05	0.04	0.06	0.06	0.04	0.11	0.07	0.61	0.39	0.15	0.12	0.09	0.1	0.06	0.1	0.09	0.08	0.93	0.05	0.04	0.04	0.08	0.06	0.1	0.03	0.04	0.05	0.05	0.09	0.04	0.08	0.05	0.06	0.16	0.05	0.12	0.04	0.07	0.04	0.09	0.14	0.05
cg08912400	CHRNA4	Pure Island	Within	0.17	0.13	0.13	0.05	0.12	0.04	0.1	0.07	0.06	0.04	0.03	0.3	0.47	0.05	0.28	0.66	0.15	0.41	0.57	0.14	0.79	0.82	0.57	0.59	0.37	0.78	0.77	0.43	0.33	0.21	0.12	0.22	0.05	0.21	0.32	0.07	0.73	0.84	0.4	0.36	0.86	0.32	0.13	0.69	0.35	0.2
cg08923450	HEY2	Pure Island	Within	0.17	0.17	0.11	0.1	0.08	0.08	0.06	0.07	0.06	0.15	0.06	0.73	0.35	0.09	0.27	0.21	0.15	0.17	0.15	0.22	0.59	0.58	0.05	0.05	0.04	0.32	0.07	0.06	0.06	0.06	0.05	0.07	0.24	0.05	0.08	0.07	0.13	0.09	0.16	0.1	0.11	0.06	0.16	0.43	0.11	0.05
cg08949296	JPH1	Pure Island	Within	0.05	0.04	0.03	0.12	0.09	0.09	0.09	0.09	0.11	0.15	0.04	0.77	0.98	0.02	0.05	0.03	0.42	0.05	0.05	0.06	0.02	0.31	0.03	0.03	0.14	0.03	0.07	0.09	0.02	0.02	0.02	0.02	0.07	0.03	0.03	0.03	0.03	0.02	0.04	0.03	0.97	0.04	0.02	0.06	0.13	0.28
cg08954856	BIK	Pure Island	Within	0.08	0.12	0.1	0.1	0.08	0.08	0.1	0.1	0.08	0.12	0.16	0.7	0.45	0.65	0.3	0.26	0.55	0.11	0.22	0.24	0.49	0.78	0.13	0.03	0.13	0.34	0.08	0.23	0.09	0.06	0.15	0.24	0.41	0.11	0.3	0.7	0.26	0.23	0.65	0.82	0.2	0.07	0.42	0.59	0.46	0.11
cg08990057	PLS3	Pure Island	Within	0.12	0.09	0.06	0.19	0.06	0.05	0.04	0.05	0.08	0.21	0.07	0.09	0.06	0.29	0.11	0.69	0.08	0.09	0.12	0.09	0.31	0.18	0.03	0.02	0.03	0.04	0.04	0.02	0.03	0.03	0.03	0.04	0.43	0.03	0.03	0.06	0.19	0.06	0.08	0.04	0.04	0.05	0.05	0.07	0.07	0.07
cg08995424	ATP5G2	Pure Island	Within	0.07	0.07	0.06	0.07	0.04	0.06	0.04	0.05	0.04	0.04	0.06	0.87	0.27	0.42	0.55	0.84	0.74	0.72	0.11	0.08	0.79	0.86	0.83	0.03	0.9	0.85	0.9	0.85	0.9	0.85	0.08	0.89	0.89	0.04	0.67	0.54	0.09	0.48	0.28	0.53	0.89	0.56	0.89	0.74	0.76	0.84
cg08997253	GRIN3A	Pure Island	Within	0.13	0.14	0.09	0.19	0.03	0.03	0.03	0.04	0.05	0.02	0.05	0.07	0.9	0.55	0.17	0.35	0.24	0.15	0.57	0.28	0.42	0.81	0.4	0.73	0.06	0.42	0.03	0.36	0.03	0.03	0.3	0.05	0.01	0.03	0.55	0.37	0.32	0.44	0.57	0.54	0.87	0.08	0.35	0.74	0.45	0.27
cg08998967	SLC25A13	Pure Island	Within	0.06	0.07	0.06	0.03	0.04	0.05	0.04	0.04	0.03	0.02	0.04	0.05	0.06	0.05	0.11	0.06	0.1	0.06	0.09	0.07	0.06	0.06	0.04	0.07	0.03	0.04	0.03	0.03	0.03	0.03	0.04	0.04	0.03	0.04	0.05	0.05	0.05	0.06	0.04	0.05	0.06	0.06	0.05	0.08	0.05	0.03
cg08999486	CDC42BPB	Pure Island	Within	0.07	0.1	0.05	0.02	0.04	0.03	0.03	0.03	0.03	0.03	0.02	0.17	0.93	0.05	0.09	0.06	0.11	0.08	0.08	0.1	0.11	0.09	0.03	0.02	0.04	0.04	0.04	0.03	0.02	0.03	0.02	0.03	0.02	0.03	0.03	0.02	0.06	0.03	0.04	0.04	0.04	0.06	0.04	0.06	0.13	0.03
cg09009111	EMILIN2	Pure Island	Within	0.06	0.07	0.07	0.03	0.04	0.06	0.05	0.1	0.04	0.03	0.09	0.04	0.05	0.63	0.49	0.96	0.25	0.85	0.55	0.3	0.96	0.96	0.4	0.04	0.04	0.97	0.04	0.09	0.03	0.12	0.54	0.03	0.14	0.04	0.96	0.5	0.72	0.04	0.97	0.61	0.09	0.05	0.59	0.72	0.88	0.06
cg09009259	MUM1	Pure Island	Within	0.12	0.07	0.05	0.08	0.06	0.07	0.04	0.07	0.06	0.1	0.14	0.06	0.75	0.07	0.09	0.28	0.61	0.06	0.18	0.31	0.12	0.09	0.37	0.76	0.13	0.08	0.04	0.07	0.67	0.3	0.09	0.85	0.08	0.44	0.05	0.81	0.18	0.66	0.23	0.25	0.48	0.08	0.05	0.48	0.09	0.31
cg09010998	ZEB1	Pure Island	Within	0.16	0.13	0.1	0.16	0.07	0.06	0.06	0.08	0.07	0.07	0.04	0.11	0.07	0.05	0.16	0.08	0.12	0.13	0.13	0.22	0.77	0.15	0.04	0.04	0.04	0.04	0.07	0.04	0.04	0.04	0.04	0.04	0.13	0.05	0.88	0.05	0.42	0.09	0.35	0.05	0.06	0.09	0.07	0.14	0.07	0.04
cg09019938	PRKG1	Pure Island	Within	0.09	0.09	0.05	0.11	0.03	0.03	0.04	0.04	0.04	0.07	0.04	0.05	0.95	0.04	0.57	0.07	0.3	0.06	0.55	0.38	0.87	0.91	0.04	0.02	0.07	0.04	0.04	0.21	0.03	0.04	0.03	0.05	0.04	0.73	0.92	0.12	0.66	0.1	0.51	0.12	0.56	0.04	0.06	0.83	0.39	0.11
cg09022993	SPATA18	Pure Island	Within	0.05	0.07	0.04	0.19	0.05	0.03	0.04	0.04	0.04	0.08	0.04	0.84	0.94	0.04	0.42	0.12	0.78	0.59	0.7	0.21	0.2	0.84	0.42	0.04	0.06	0.19	0.06	0.14	0.05	0.09	0.04	0.24	0.06	0.13	0.06	0.06	0.32	0.31	0.78	0.17	0.34	0.06	0.06	0.39	0.07	0.77
cg09038676	GSTP1	Pure Island	Within	0.06	0.06	0.04	0.04	0.06	0.04	0.05	0.05	0.05	0.02	0.03	0.04	0.03	0.03	0.06	0.76	0.56	0.44	0.07	0.07	0.08	0.06	0.06	0.19	0.02	0.85	0.02	0.02	0.02	0.02	0.03	0.02	0.07	0.03	0.03	0.02	0.05	0.02	0.03	0.03	0.02	0.04	0.02	0.06	0.07	0.04
cg09076012	NOV	Pure Island	Within	0.25	0.22	0.17	0.1	0.11	0.09	0.09	0.11	0.09	0.09	0.11	0.13	0.11	0.11	0.28	0.39	0.21	0.13	0.22	0.23	0.25	0.42	0.12	0.09	0.08	0.23	0.15	0.11	0.08	0.09	0.09	0.09	0.09	0.09	0.29	0.12	0.3	0.46	0.1	0.15	0.7	0.1	0.08	0.11	0.14	0.1
cg09079275	ADAM19	Pure Island	Within	0.11	0.09	0.08	0.03	0.21	0.07	0.08	0.14	0.16	0.03	0.19	0.07	0.66	0.55	0.15	0.4	0.46	0.19	0.11	0.12	0.76	0.82	0.07	0.08	0.05	0.11	0.04	0.05	0.11	0.07	0.21	0.06	0.16	0.05	0.1	0.11	0.47	0.06	0.91	0.44	0.14	0.1	0.62	0.07	0.07	0.05
cg09083627	SLITRK5	Pure Island	Within	0.04	0.04	0.02	0.05	0.02	0.04	0.03	0.03	0.02	0.01	0.02	0.98	0.03	0.02	0.98	0.03	0.59	0.03	0.95	0.96	0.96	0.96	0.11	0.01	0.02	0.03	0.03	0.01	0.02	0.01	0.01	0.02	0.05	0.62	0.05	0.96	0.95	0.98	0.97	0.03	0.98	0.98	0.99	0.93	0.05	0.35
cg09088508	RHOF	Pure Island	Within	0.05	0.08	0.05	0.02	0.03	0.03	0.03	0.03	0.03	0.04	0.03	0.03	0.03	0.04	0.34	0.06	0.21	0.05	0.07	0.08	0.07	0.05	0.02	0.92	0.03	0.03	0.02	0.02	0.11	0.02	0.03	0.02	0.01	0.09	0.04	0.03	0.05	0.03	0.02	0.04	0.03	0.03	0.02	0.06	0.05	0.03
cg09092161	AK1	Pure Island	Within	0.05	0.05	0.02	0.05	0.03	0.05	0.03	0.04	0.03	0.05	0.03	0.04	0.91	0.03	0.08	0.05	0.07	0.03	0.07	0.06	0.04	0.04	0.02	0.03	0.02	0.02	0.05	0.02	0.03	0.02	0.02	0.02	0.1	0.02	0.03	0.05	0.06	0.04	0.04	0.02	0.02	0.04	0.03	0.08	0.06	0.03
cg09126273	PTPRO	Pure Island	Within	0.07	0.07	0.04	0.03	0.07	0.08	0.09	0.11	0.09	0.03	0.08	0.81	0.95	0.06	0.14	0.72	0.1	0.62	0.82	0.87	0.88	0.91	0.24	0.02	0.04	0.69	0.04	0.22	0.03	0.03	0.05	0.03	0.02	0.04	0.85	0.41	0.78	0.73	0.94	0.94	0.93	0.12	0.04	0.58	0.79	0.05
cg09134003	NEUROG2	Pure Island	Within	0.06	0.05	0.05	0.03	0.04	0.04	0.04	0.03	0.04	0.02	0.05	0.93	0.05	0.07	0.14	0.11	0.06	0.06	0.19	0.09	0.92	0.93	0.03	0.04	0.04	0.38	0.03	0.03	0.03	0.04	0.05	0.04	0.02	0.05	0.53	0.06	0.76	0.13	0.07	0.1	0.04	0.06	0.17	0.15	0.83	0.05
cg09146695	LEF1	Pure Island	Within	0.23	0.16	0.12	0.06	0.04	0.06	0.05	0.05	0.05	0.1	0.08	0.08	0.09	0.15	0.15	0.25	0.18	0.12	0.16	0.22	0.78	0.17	0.04	0.03	0.03	0.06	0.1	0.02	0.04	0.04	0.04	0.04	0.06	0.06	0.07	0.09	0.54	0.11	0.05	0.11	0.09	0.1	0.06	0.48	0.08	0.15
cg09160477	SUSD3	Pure Island	Within	0.08	0.06	0.04	0.02	0.04	0.02	0.02	0.03	0.02	0.01	0.06	0.94	0.97	0.29	0.2	0.03	0.05	0.03	0.06	0.06	0.1	0.97	0.04	0.55	0.84	0.02	0.54	0.01	0.72	0.06	0.03	0.65	0.99	0.96	0.07	0.06	0.03	0.66	0.54	0.03	0.99	0.03	0.01	0.06	0.04	0.1
cg09186006	SLC16A12	Pure Island	Within	0.05	0.07	0.05	0.02	0.04	0.06	0.03	0.04	0.03	0.02	0.05	0.94	0.22	0.6	0.63	0.94	0.46	0.9	0.94	0.93	0.96	0.95	0.41	0.02	0.53	0.95	0.03	0.38	0.03	0.02	0.14	0.63	0.05	0.03	0.96	0.98	0.95	0.7	0.97	0.97	0.97	0.04	0.97	0.93	0.66	0.6
cg09191327	PRDM12	Pure Island	Within	0.1	0.12	0.06	0.03	0.05	0.05	0.05	0.05	0.05	0.05	0.04	0.07	0.28	0.11	0.13	0.7	0.18	0.16	0.86	0.72	0.9	0.89	0.13	0.03	0.68	0.87	0.57	0.35	0.76	0.14	0.07	0.24	0.03	0.03	0.78	0.29	0.78	0.52	0.89	0.97	0.97	0.19	0.08	0.92	0.76	0.84
cg09225321	USH1G	Pure Island	Within	0.17	0.07	0.09	0.11	0.09	0.07	0.05	0.08	0.06	0.04	0.06	0.39	0.06	0.08	0.12	0.62	0.1	0.12	0.22	0.12	0.52	0.84	0.08	0.08	0.13	0.65	0.18	0.21	0.42	0.11	0.07	0.32	0.07	0.06	0.28	0.75	0.16	0.57	0.48	0.14	0.7	0.06	0.08	0.51	0.8	0.39
cg09229231	DHRS3	Pure Island	Within	0.05	0.07	0.04	0.04	0.05	0.05	0.05	0.04	0.03	0.04	0.03	0.05	0.04	0.04	0.46	0.07	0.07	0.06	0.07	0.05	0.06	0.74	0.03	0.03	0.02	0.03	0.03	0.02	0.03	0.03	0.03	0.03	0.04	0.03	0.03	0.04	0.05	0.03	0.04	0.05	0.52	0.04	0.04	0.09	0.06	0.05
cg09229912	CUX2	Pure Island	Within	0.1	0.1	0.09	0.04	0.03	0.04	0.03	0.03	0.02	0.01	0.08	0.07	0.05	0.19	0.21	0.09	0.53	0.05	0.91	0.92	0.9	0.95	0.52	0.02	0.06	0.03	0.03	0.08	0.02	0.41	0.21	0.92	0.2	0.69	0.96	0.97	0.94	0.96	0.97	0.61	0.96	0.12	0.69	0.88	0.89	0.81
cg09231514	HSD11B1L	Pure Island	Within	0.08	0.06	0.06	0.06	0.07	0.07	0.1	0.08	0.06	0.1	0.04	0.04	0.51	0.21	0.3	0.54	0.6	0.05	0.6	0.44	0.93	0.96	0.41	0.08	0.63	0.35	0.27	0.19	0.02	0.36	0.02	0.6	0.07	0.02	0.87	0.96	0.61	0.64	0.97	0.15	0.81	0.16	0.11	0.45	0.48	0.07
cg09239756	CKAP4	Pure Island	Within	0.14	0.14	0.08	0.13	0.07	0.06	0.07	0.07	0.06	0.1	0.08	0.09	0.27	0.11	0.13	0.31	0.4	0.09	0.12	0.18	0.55	0.14	0.11	0.05	0.04	0.57	0.05	0.03	0.08	0.04	0.09	0.04	0.08	0.05	0.07	0.39	0.18	0.07	0.07	0.13	0.08	0.06	0.07	0.07	0.08	0.04
cg09260830	GNA14	Pure Island	Within	0.13	0.13	0.21	0.06	0.07	0.08	0.08	0.09	0.07	0.03	0.21	0.85	0.32	0.38	0.5	0.3	0.11	0.1	0.37	0.52	0.89	0.95	0.51	0.09	0.91	0.76	0.62	0.45	0.61	0.39	0.08	0.62	0.96	0.31	0.12	0.93	0.09	0.95	0.12	0.43	0.91	0.16	0.45	0.91	0.14	0.19
cg09264112	GCHFR	Pure Island	Within	0.05	0.06	0.02	0.01	0.04	0.03	0.03	0.04	0.03	0.02	0.17	0.96	0.95	0.03	0.86	0.05	0.04	0.04	0.07	0.06	0.05	0.04	0.01	0.01	0.06	0.02	0.02	0.02	0.02	0.02	0.02	0.02	0.63	0.02	0.02	0.02	0.03	0.02	0.01	0.02	0.12	0.03	0.53	0.45	0.04	0.06
cg09266433	OSBPL6	Pure Island	Within	0.11	0.1	0.06	0.05	0.06	0.03	0.03	0.04	0.04	0.05	0.03	0.06	0.05	0.04	0.16	0.07	0.1	0.1	0.09	0.15	0.37	0.85	0.03	0.03	0.04	0.03	0.03	0.02	0.02	0.02	0.02	0.03	0.02	0.06	0.04	0.04	0.29	0.03	0.02	0.32	0.04	0.06	0.04	0.11	0.07	0.03
cg09297361	SNX22	Pure Island	Within	0.11	0.12	0.09	0.05	0.07	0.09	0.07	0.06	0.05	0.05	0.05	0.44	0.07	0.13	0.17	0.31	0.13	0.08	0.28	0.17	0.43	0.86	0.04	0.04	0.09	0.05	0.11	0.08	0.05	0.04	0.05	0.29	0.05	0.18	0.07	0.09	0.09	0.3	0.81	0.29	0.81	0.08	0.18	0.13	0.09	0.07
cg09303043	ALDH3A2	Pure Island	Within	0.05	0.07	0.04	0.02	0.03	0.03	0.03	0.03	0.02	0.04	0.02	0.04	0.06	0.03	0.08	0.05	0.1	0.04	0.08	0.07	0.07	0.08	0.02	0.02	0.02	0.02	0.03	0.02	0.02	0.02	0.02	0.03	0.03	0.02	0.03	0.03	0.06	0.04	0.03	0.04	0.03	0.04	0.03	0.07	0.05	0.03
cg09313439	CDH2	Pure Island	Within	0.06	0.06	0.04	0.03	0.04	0.05	0.05	0.05	0.04	0.02	0.03	0.04	0.04	0.04	0.07	0.08	0.52	0.09	0.78	0.86	0.85	0.93	0.14	0.04	0.04	0.23	0.02	0.24	0.04	0.84	0.04	0.03	0.02	0.83	0.89	0.92	0.69	0.92	0.9	0.9	0.9	0.03	0.04	0.87	0.69	0.27
cg09331011	GNAL	Pure Island	Within	0.06	0.08	0.05	0.03	0.04	0.07	0.04	0.03	0.03	0.02	0.03	0.04	0.04	0.04	0.08	0.63	0.36	0.06	0.07	0.1	0.93	0.22	0.04	0.09	0.03	0.51	0.03	0.03	0.02	0.02	0.03	0.03	0.02	0.03	0.89	0.03	0.13	0.03	0.03	0.58	0.05	0.03	0.03	0.04	0.05	0.03
cg09339527	ZFP2	Pure Island	Within	0.06	0.06	0.04	0.05	0.03	0.02	0.02	0.03	0.03	0.02	0.02	0.95	0.88	0.04	0.4	0.42	0.07	0.04	0.07	0.62	0.06	0.05	0.02	0.12	0.64	0.37	0.09	0.31	0.4	0.52	0.18	0.86	0.02	0.76	0.02	0.01	0.12	0.02	0.12	0.09	0.02	0.03	0.01	0.38	0.04	0.1
cg09413557	S100A6	Pure Island	Within	0.09	0.04	0.03	0.02	0.03	0.03	0.03	0.03	0.02	0.03	0.02	0.05	0.08	0.02	0.05	0.43	0.04	0.04	0.06	0.05	0.05	0.05	0.42	0.05	0.02	0.51	0.02	0.02	0.02	0.02	0.02	0.02	0.01	0.91	0.02	0.02	0.05	0.2	0.02	0.03	0.03	0.03	0.02	0.04	0.06	0.02
cg09416313	MATK	Pure Island	Within	0.13	0.09	0.06	0.1	0.03	0.04	0.03	0.03	0.03	0.03	0.06	0.12	0.35	0.54	0.58	0.16	0.55	0.05	0.43	0.23	0.89	0.91	0.95	0.02	0.88	0.06	0.7	0.87	0.43	0.15	0.1	0.53	0.08	0.11	0.97	0.97	0.91	0.94	0.96	0.97	0.97	0.6	0.96	0.92	0.9	0.22
cg09418283	PAWR	Pure Island	Within	0.07	0.06	0.03	0.02	0.03	0.02	0.03	0.03	0.02	0.03	0.02	0.36	0.46	0.03	0.07	0.06	0.08	0.04	0.06	0.09	0.06	0.07	0.02	0.02	0.02	0.02	0.02	0.02	0.02	0.01	0.02	0.02	0.02	0.02	0.02	0.02	0.03	0.02	0.02	0.02	0.02	0.03	0.02	0.12	0.03	0.02
cg09441152	PQLC1	Pure Island	Within	0.1	0.09	0.05	0.03	0.06	0.06	0.05	0.07	0.04	0.04	0.19	0.15	0.05	0.07	0.08	0.11	0.18	0.07	0.17	0.16	0.84	0.46	0.07	0.07	0.07	0.09	0.05	0.06	0.08	0.07	0.18	0.49	0.08	0.03	0.05	0.04	0.09	0.03	0.13	0.1	0.04	0.04	0.04	0.15	0.18	0.04
cg09450020	STEAP2	Pure Island	Within	0.04	0.06	0.03	0.03	0.02	0.02	0.02	0.02	0.02	0.01	0.02	0.03	0.96	0.02	0.09	0.55	0.84	0.04	0.07	0.04	0.2	0.04	0.02	0.03	0.02	0.94	0.02	0.01	0.12	0.03	0.01	0.02	0.01	0.33	0.02	0.03	0.03	0.02	0.02	0.03	0.84	0.02	0.02	0.06	0.1	0.02
cg09464487	ACTR6	Pure Island	Within	0.03	0.03	0.03	0.02	0.03	0.03	0.03	0.03	0.02	0.01	0.02	0.02	0.02	0.02	0.04	0.03	0.03	0.03	0.03	0.03	0.07	0.53	0.17	0.01	0.02	0.1	0.02	0.01	0.01	0.01	0.01	0.12	0.01	0.01	0.01	0.01	0.05	0.01	0.01	0.11	0.08	0.02	0.01	0.03	0.04	0.02
cg09472203	AP3B2	Pure Island	Within	0.08	0.11	0.05	0.07	0.03	0.05	0.04	0.05	0.04	0.04	0.03	0.05	0.05	0.04	0.12	0.06	0.11	0.06	0.37	0.52	0.86	0.88	0.02	0.03	0.02	0.03	0.03	0.02	0.02	0.02	0.03	0.03	0.04	0.03	0.03	0.03	0.08	0.04	0.04	0.18	0.05	0.04	0.03	0.28	0.09	0.03
cg09479015	KIRREL2	Pure Island	Within	0.07	0.1	0.06	NA	0.07	0.07	0.08	0.06	0.05	0.08	0.12	0.44	0.04	0.11	0.13	0.9	0.55	0.83	0.79	0.72	0.9	0.88	0.02	0.11	0.12	0.89	0.05	0.02	0.89	0.03	0.28	0.56	0.26	0.15	0.94	0.55	0.68	0.91	0.9	0.76	0.08	0.03	0.06	0.78	0.15	0.22
cg09486567	OVOL2	Pure Island	Within	0.04	0.05	0.03	0.03	0.05	0.06	0.03	0.05	0.05	0.09	0.03	0.05	0.09	0.03	0.09	0.04	0.07	0.04	0.09	0.05	0.03	0.27	0.02	0.02	0.03	0.02	0.07	0.02	0.04	0.02	0.02	0.03	0.05	0.02	0.02	0.03	0.04	0.03	0.04	0.03	0.04	0.04	0.08	0.05	0.07	0.04
cg09495977	HTRA3	Pure Island	Within	0.1	0.12	0.06	0.03	0.05	0.07	0.1	0.12	0.05	0.06	0.12	0.06	0.48	0.67	0.41	0.87	0.77	0.76	0.25	0.09	0.85	0.92	0.46	0.93	0.52	0.91	0.95	0.15	0.19	0.9	0.18	0.03	0.58	0.09	0.9	0.89	0.86	0.78	0.92	0.67	0.95	0.06	0.11	0.79	0.52	0.17
cg09498379	NEDD4	Pure Island	Within	0.05	0.06	0.03	0.02	0.02	0.02	0.01	0.02	0.01	0.01	0.01	0.22	0.02	0.02	0.06	0.03	0.04	0.03	0.06	0.06	0.06	0.04	0.01	0.01	0.01	0.01	0.01	0.01	0.01	0.01	0.01	0.01	0.14	0.01	0.01	0.01	0.02	0.01	0.01	0.02	0.02	0.02	0.01	0.07	0.03	0.01
cg09500672	LYPD6	Pure Island	Within	0.07	0.07	0.07	0.03	0.05	0.05	0.05	0.05	0.05	0.03	0.06	0.06	0.95	0.05	0.12	0.07	0.07	0.07	0.13	0.1	0.1	0.08	0.08	0.04	0.04	0.04	0.03	0.05	0.03	0.04	0.05	0.04	0.03	0.03	0.04	0.03	0.08	0.04	0.04	0.04	0.91	0.05	0.04	0.11	0.09	0.06
cg09516965	PTGDR	Pure Island	Within	0.11	0.14	0.05	0.13	0.05	0.04	0.03	0.04	0.05	0.03	0.04	0.97	0.99	0.6	0.98	0.98	0.47	0.79	0.73	0.33	0.97	0.98	0.98	0.54	0.98	0.98	0.99	0.9	0.99	0.76	0.1	0.99	0.99	0.99	0.88	0.9	0.49	0.99	0.99	0.41	0.99	0.04	0.99	0.97	0.91	0.98
cg09527362	C6orf150	Pure Island	Within	0.15	0.07	0.08	0.08	0.23	0.16	0.16	0.13	0.09	0.07	0.22	0.34	0.04	0.04	0.57	0.14	0.33	0.91	0.89	0.75	0.94	0.05	0.02	0.93	0.31	0.24	0.02	0.02	0.95	0.1	0.06	0.03	0.96	0.87	0.04	0.05	0.05	0.05	0.55	0.05	0.06	0.04	0.03	0.86	0.07	0.04
cg09537031	SH2D4A	Pure Island	Within	0.07	0.06	0.04	0.06	0.04	0.05	0.04	0.04	0.04	0.04	0.03	0.7	0.09	0.03	0.14	0.05	0.06	0.06	0.05	0.07	0.06	0.08	0.02	0.03	0.03	0.03	0.04	0.03	0.03	0.03	0.03	0.03	0.06	0.42	0.04	0.04	0.09	0.05	0.04	0.05	0.89	0.06	0.03	0.1	0.07	0.04
cg09539438	NTRK2	Pure Island	Within	0.05	0.02	0.02	0.09	0.06	0.05	0.04	0.04	0.04	0.04	0.11	0.03	0.98	0.19	0.11	0.22	0.04	0.03	0.17	0.03	0.9	0.98	0.08	0.01	0.04	0.14	0.03	0.03	0.02	0.01	0.03	0.05	0.19	0.02	0.15	0.06	0.93	0.92	0.28	0.97	0.98	0.06	0.96	0.38	0.23	0.06
cg09549827	HES2	Pure Island	Within	0.25	0.05	0.04	0.05	0.05	0.06	0.06	0.05	0.05	0.03	0.19	0.84	0.47	0.16	0.71	0.05	0.07	0.05	0.06	0.1	0.16	0.74	0.05	0.02	0.05	0.04	0.03	0.09	0.11	0.03	0.08	0.09	0.06	0.03	0.03	0.07	0.06	0.05	0.04	0.05	0.94	0.04	0.04	0.08	0.1	0.03
cg09573435	SEMA6A	Pure Island	Within	0.06	0.07	0.05	0.12	0.04	0.04	0.05	0.04	0.04	0.1	0.03	0.06	0.05	0.04	0.1	0.05	0.1	0.05	0.2	0.09	0.79	0.8	0.04	0.03	0.03	0.04	0.03	0.03	0.02	0.03	0.04	0.03	0.08	0.03	0.04	0.04	0.09	0.06	0.09	0.05	0.15	0.05	0.06	0.07	0.24	0.03
cg09587549	PYCARD	Pure Island	Within	0.1	0.1	0.06	0.04	0.06	0.06	0.05	0.06	0.05	0.04	0.03	0.9	0.13	0.3	0.76	0.05	0.11	0.73	0.19	0.5	0.88	0.95	0.91	0.19	0.83	0.04	0.9	0.05	0.07	0.81	0.06	0.94	0.89	0.97	0.04	0.7	0.06	0.96	0.9	0.49	0.96	0.05	0.04	0.89	0.14	0.89
cg09615786	DCBLD2	Pure Island	Within	0.09	0.11	0.06	0.14	0.06	0.06	0.05	0.05	0.04	0.07	0.03	0.05	0.05	0.03	0.06	0.05	0.05	0.04	0.1	0.08	0.08	0.07	0.02	0.02	0.03	0.04	0.04	0.04	0.04	0.03	0.04	0.02	0.14	0.03	0.02	0.03	0.03	0.03	0.07	0.03	0.04	0.04	0.02	0.04	0.06	0.03
cg09622447	CBS	Pure Island	Within	0.05	0.08	0.06	0.03	0.15	0.15	0.12	0.13	0.23	0.07	0.13	0.04	0.54	0.71	0.08	0.15	0.24	0.42	0.21	0.07	0.91	0.94	0.06	0.04	0.04	0.12	0.03	0.06	0.04	0.05	0.09	0.06	0.06	0.03	0.94	0.85	0.93	0.04	0.97	0.92	0.08	0.06	0.55	0.86	0.7	0.11
cg09626984	GATA4	Pure Island	Within	0.04	0.05	0.08	0.03	0.15	0.16	0.13	0.21	0.2	0.08	0.19	0.87	0.9	0.44	0.42	0.86	0.69	0.87	0.85	0.82	0.88	0.91	0.58	0.48	0.92	0.88	0.96	0.92	0.93	0.87	0.62	0.91	0.94	0.71	0.87	0.82	0.88	0.91	0.93	0.03	0.92	0.04	0.02	0.88	0.8	0.64
cg09630437	SLC39A3	Pure Island	Within	0.06	0.15	0.15	0.13	0.08	0.08	0.14	0.12	0.08	0.05	0.19	0.14	0.13	0.2	0.29	0.16	0.24	0.07	0.24	0.27	0.2	0.3	0.13	0.04	0.09	0.15	0.06	0.12	0.21	0.1	0.16	0.16	0.03	0.1	0.12	0.21	0.21	0.21	0.11	0.75	0.21	0.09	0.19	0.26	0.33	0.07
cg09635067	RAB7L1	Pure Island	Within	0.12	0.08	0.08	0.14	0.04	0.05	0.07	0.04	0.03	0.02	0.06	0.07	0.05	0.12	0.33	0.26	0.16	0.08	0.32	0.12	0.56	0.14	0.1	0.05	0.39	0.16	0.07	0.15	0.12	0.26	0.16	0.18	0.03	0.08	0.07	0.51	0.24	0.05	0.38	0.3	0.21	0.07	0.12	0.88	0.4	0.08
cg09644722	2011-03-10	Pure Island	Within	0.04	0.08	0.11	0.08	0.21	0.14	0.15	0.14	0.2	0.09	0.16	0.13	0.95	0.45	0.87	0.04	0.89	0.05	0.09	0.08	0.21	0.94	0.39	0.02	0.95	0.06	0.04	0.05	0.05	0.56	0.05	0.94	0.03	0.93	0.04	0.84	0.12	0.92	0.05	0.39	0.94	0.07	0.29	0.33	0.09	0.35
cg09660171	LMX1B	Pure Island	Within	0.1	0.13	0.09	0.05	0.03	0.04	0.03	0.04	0.03	0.03	0.04	0.56	0.39	0.06	0.14	0.08	0.08	0.08	0.21	0.2	0.81	0.77	0.05	0.43	0.13	0.04	0.03	0.04	0.04	0.42	0.08	0.26	0.03	0.07	0.87	0.49	0.79	0.04	0.92	0.32	0.04	0.04	0.37	0.22	0.22	0.22
cg09666654	MYO1B	Pure Island	Within	0.05	0.06	0.05	0.08	0.05	0.05	0.07	0.06	0.06	0.04	0.05	0.03	0.05	0.06	0.06	0.07	0.07	0.05	0.09	0.07	0.03	0.05	0.02	0.02	0.03	0.03	0.04	0.02	0.02	0.02	0.04	0.03	0.04	0.03	0.04	0.06	0.06	0.04	0.04	0.07	0.05	0.07	0.04	0.09	0.07	0.04
cg09688546	GLRB	Pure Island	Within	0.04	0.04	0.03	0.02	0.02	0.02	0.03	0.03	0.02	0.01	0.02	0.03	0.03	0.03	0.41	0.11	0.05	0.03	0.74	0.88	0.91	0.9	0.02	0.02	0.02	0.47	0.02	0.02	0.02	0.02	0.02	0.02	0.01	0.94	0.89	0.62	0.91	0.92	0.96	0.94	0.58	0.02	0.02	0.93	0.06	0.02
cg09712527	KBTBD7	Pure Island	Within	0.04	0.05	0.04	0.04	0.02	0.02	0.02	0.03	0.02	0.05	0.05	0.03	0.03	0.04	0.19	0.06	0.05	0.05	0.04	0.07	0.34	0.05	0.03	0.03	0.02	0.05	0.02	0.02	0.02	0.03	0.02	0.06	0.02	0.05	0.02	0.04	0.1	0.05	0.08	0.04	0.02	0.04	0.03	0.11	0.05	0.03
cg09717545	KISS1R	Pure Island	Within	0.1	0.1	0.09	0.13	0.08	0.08	0.09	0.08	0.08	0.04	0.08	0.93	0.09	0.11	0.14	0.52	0.91	0.08	0.12	0.09	0.93	0.95	0.09	0.07	0.08	0.59	0.07	0.09	0.09	0.21	0.08	0.08	0.05	0.1	0.08	0.89	0.1	0.11	0.54	0.38	0.95	0.11	0.07	0.09	0.16	0.11
cg09722397	GRIN2C	Pure Island	Within	0.12	0.12	0.09	0.05	0.05	0.05	0.05	0.05	0.04	0.03	0.04	0.89	0.05	0.16	0.63	0.74	0.28	0.08	0.29	0.12	0.93	0.94	0.03	0.03	0.04	0.97	0.05	0.13	0.03	0.03	0.04	0.05	0.03	0.03	0.93	0.35	0.31	0.44	0.09	0.24	0.77	0.07	0.04	0.19	0.07	0.1
cg09736162	CELSR3	Pure Island	Within	0.03	0.03	0.02	0.02	0.02	0.02	0.03	0.03	0.03	0.01	0.04	0.01	0.98	0.06	0.12	0.03	0.03	0.03	0.04	0.05	0.97	0.98	0.02	0.01	0.01	0.02	0.01	0.01	0.01	0.01	0.02	0.02	0.01	0.02	0.99	0.16	0.05	0.01	0.52	0.05	0.98	0.03	0.01	0.3	0.71	0.02
cg09761310	EPS8	Pure Island	Within	0.06	0.04	0.04	0.06	0.03	0.04	0.03	0.04	0.03	0.04	0.03	0.08	0.09	0.03	0.5	0.04	0.06	0.04	0.12	0.04	0.05	0.75	0.14	0.03	0.03	0.03	0.03	0.04	0.04	0.05	0.03	0.08	0.04	0.17	0.04	0.06	0.06	0.07	0.04	0.03	0.27	0.07	0.03	0.1	0.05	0.04
cg09766383	GPR63	Pure Island	Within	0.08	0.1	0.08	0.03	0.05	0.05	0.04	0.05	0.04	0.02	0.06	0.06	0.06	0.18	0.1	0.07	0.1	0.07	0.09	0.1	0.84	0.08	0.06	0.06	0.05	0.05	0.03	0.06	0.05	0.05	0.05	0.05	0.03	0.05	0.08	0.05	0.09	0.06	0.05	0.07	0.06	0.06	0.05	0.1	0.11	0.05
cg09770154	MXI1	Pure Island	Within	0.04	0.04	0.02	0.02	0.03	0.03	0.02	0.03	0.03	0.01	0.02	0.53	0.03	0.03	0.05	0.04	0.05	0.03	0.06	0.05	0.04	0.03	0.02	0.02	0.02	0.03	0.01	0.02	0.02	0.02	0.02	0.03	0.02	0.02	0.02	0.02	0.08	0.02	0.02	0.03	0.02	0.04	0.02	0.04	0.07	0.03
cg09770323	TMEM158	Pure Island	Within	0.09	0.09	0.08	0.03	0.06	0.05	0.07	0.08	0.06	0.05	0.04	0.09	0.08	0.06	0.08	0.1	0.15	0.08	0.12	0.1	0.15	0.07	0.04	0.04	0.05	0.05	0.07	0.03	0.04	0.03	0.04	0.04	0.04	0.05	0.05	0.05	0.08	0.05	0.06	0.3	0.06	0.09	0.05	0.1	0.14	0.04
cg09773756	MMS19	Pure Island	Within	0.13	0.19	0.08	0.14	0.07	0.09	0.07	0.06	0.09	0.1	0.06	0.08	0.06	0.05	0.13	0.13	0.14	0.09	0.19	0.2	0.93	0.19	0.04	0.03	0.05	0.14	0.12	0.03	0.04	0.06	0.06	0.05	0.09	0.07	0.04	0.09	0.1	0.06	0.91	0.73	0.04	0.05	0.07	0.09	0.09	0.07
cg09775312	PPP1R3C	Pure Island	Within	0.07	0.06	0.04	0.03	0.02	0.03	0.02	0.03	0.03	0.03	0.04	0.04	0.4	0.21	0.79	0.26	0.06	0.05	0.49	0.39	0.89	0.91	0.02	0.02	0.02	0.96	0.05	0.02	0.02	0.02	0.03	0.38	0.03	0.95	0.91	0.92	0.93	0.93	0.97	0.03	0.93	0.02	0.02	0.91	0.21	0.03
cg09785172	WFS1	Pure Island	Within	0.05	0.05	0.05	0.02	0.04	0.03	0.03	0.03	0.03	0.01	0.03	0.04	0.96	0.04	0.05	0.06	0.11	0.04	0.08	0.05	0.05	0.07	0.03	0.03	0.02	0.03	0.02	0.03	0.03	0.02	0.03	0.03	0.02	0.03	0.03	0.03	0.08	0.04	0.02	0.05	0.03	0.03	0.04	0.05	0.05	0.03
cg09786221	MYL9	Pure Island	Within	0.03	0.02	0.01	0.01	0.03	0.02	0.02	0.02	0.02	0.01	0.03	0.01	0.99	0.02	0.06	0.96	0.15	0.02	0.04	0.02	0.56	0.49	0.01	0.99	0.99	0.99	0	0.01	0.69	0.01	0.01	0.65	0.99	0.99	0.01	0.05	0.04	0.01	0.36	0.03	0.01	0.02	0.03	0.03	0.03	0.01
cg09787254	FA2H	Pure Island	Within	0.04	0.06	0.06	0.02	0.03	0.03	0.03	0.03	0.02	0.01	0.02	0.03	0.04	0.02	0.35	0.03	0.05	0.03	0.09	0.05	0.05	0.03	0.02	0.02	0.01	0.02	0.01	0.02	0.01	0.02	0.02	0.04	0.01	0.02	0.02	0.03	0.04	0.02	0.02	0.03	0.02	0.03	0.02	0.05	0.05	0.03
cg09805010	THRB	Pure Island	Within	0.08	0.07	0.06	0.06	0.05	0.05	0.04	0.04	0.04	0.06	0.02	0.05	0.97	0.03	0.26	0.06	0.08	0.05	0.15	0.14	0.1	0.94	0.27	0.02	0.03	0.03	0.05	0.02	0.02	0.02	0.03	0.02	0.06	0.04	0.05	0.05	0.07	0.03	0.97	0.05	0.95	0.06	0.04	0.31	0.06	0.03
cg09806934	CPT1A	Pure Island	Within	0.03	0.04	0.03	0.02	0.03	0.02	0.02	0.03	0.02	0.02	0.05	0.92	0.02	0.02	0.15	0.03	0.04	0.03	0.04	0.04	0.03	0.05	0.02	0.52	0.02	0.02	0.02	0.02	0.02	0.02	0.02	0.21	0.02	0.31	0.03	0.03	0.08	0.91	0.4	0.04	0.03	0.03	0.03	0.04	0.04	0.02
cg09874752	SFRP5	Pure Island	Within	0.07	0.05	0.04	0.02	0.03	0.06	0.04	0.05	0.04	0.02	0.04	0.87	0.05	0.24	0.08	0.93	0.13	0.84	0.09	0.06	0.89	0.91	0.32	0.02	0.05	0.95	0.03	0.15	0.03	0.13	0.05	0.54	0.02	0.03	0.95	0.88	0.92	0.38	0.97	0.18	0.85	0.03	0.06	0.91	0.94	0.42
cg09879099	ONECUT2	Pure Island	Within	0.12	0.12	0.06	0.12	0.04	0.03	0.04	0.04	0.03	0.05	0.07	0.07	0.43	0.25	0.18	0.08	0.17	0.09	0.11	0.18	0.1	0.19	0.03	0.03	0.03	0.03	0.03	0.04	0.03	0.04	0.04	0.03	0.04	0.03	0.04	0.07	0.08	0.06	0.04	0.07	0.04	0.07	0.04	0.11	0.11	0.04
cg09884077	NIPA1	Pure Island	Within	0.08	0.06	0.06	0.04	0.05	0.05	0.05	0.06	0.04	0.02	0.03	0.06	0.04	0.07	0.09	0.09	0.09	0.07	0.1	0.09	0.1	0.11	0.06	0.05	0.06	0.05	0.03	0.05	0.05	0.06	0.05	0.05	0.03	0.05	0.06	0.05	0.1	0.08	0.08	0.04	0.04	0.04	0.05	0.08	0.06	0.04
cg09892203	CACNG4	Pure Island	Within	0.05	0.04	0.03	0.03	0.02	0.02	0.02	0.02	0.02	0.01	0.02	0.97	0.97	0.02	0.08	0.03	0.05	0.02	0.06	0.04	0.91	0.9	0.11	0.01	0.01	0.17	0.02	0.01	0.01	0.01	0.02	0.02	0.01	0.01	0.97	0.03	0.03	0.02	0.24	0.15	0.02	0.02	0.25	0.85	0.04	0.02
cg09896445	GPC5	Pure Island	Within	0.11	0.09	0.06	0.14	0.06	0.08	0.06	0.07	0.08	0.15	0.05	0.09	0.08	0.04	0.43	0.1	0.17	0.25	0.18	0.09	0.76	0.84	0.07	0.03	0.03	0.05	0.08	0.04	0.04	0.04	0.03	0.05	0.08	0.03	0.38	0.72	0.34	0.05	0.89	0.38	0.2	0.06	0.06	0.12	0.09	0.08
cg09906488	CAMK1D	Pure Island	Within	0.09	0.1	0.05	0.02	0.02	0.03	0.02	0.03	0.04	0.02	0.07	0.36	0.04	0.05	0.64	0.39	0.09	0.74	0.27	0.12	0.09	0.08	0.25	0.02	0.02	0.03	0.02	0.02	0.03	0.02	0.25	0.14	0.01	0.09	0.05	0.95	0.07	0.48	0.37	0.05	0.03	0.05	0.03	0.28	0.13	0.08
cg09916572	ZP3	Pure Island	Within	0.17	0.17	0.1	0.04	0.05	0.04	0.05	0.05	0.05	0.06	0.05	0.47	0.05	0.04	0.46	0.07	0.12	0.06	0.16	0.13	0.1	0.26	0.03	0.03	0.03	0.04	0.03	0.03	0.04	0.03	0.03	0.03	0.76	0.04	0.03	0.03	0.09	0.05	0.1	0.36	0.04	0.06	0.1	0.2	0.25	0.07
cg09916853	TSPAN33	Pure Island	Within	0.19	0.21	0.16	0.05	0.18	0.17	0.2	0.2	0.17	0.07	0.12	0.15	0.07	0.26	0.67	0.15	0.14	0.15	0.33	0.15	0.14	0.32	0.29	0.22	0.08	0.21	0.17	0.33	0.08	0.29	0.17	0.29	0.21	0.09	0.16	0.07	0.26	0.53	0.49	0.09	0.28	0.1	0.45	0.22	0.18	0.2
cg09944147	COL27A1	Pure Island	Within	0.08	0.08	0.04	0.03	0.02	0.03	0.02	0.03	0.02	0.01	0.01	0.04	0.03	0.02	0.07	0.37	0.08	0.04	0.59	0.96	0.06	0.03	0.01	0.02	0.02	0.22	0.04	0.01	0.02	0.02	0.02	0.02	0.02	0.02	0.49	0.53	0.04	0.03	0.98	0.35	0.02	0.04	0.03	0.54	0.04	0.02
cg09952204	RASGRF2	Pure Island	Within	0.06	0.05	0.03	0.02	0.03	0.03	0.04	0.03	0.03	0.01	0.08	0.93	0.56	0.17	0.05	0.94	0.79	0.85	0.27	0.07	0.94	0.94	0.18	0.03	0.03	0.97	0.11	0.4	0.02	0.03	0.1	0.42	0.95	0.05	0.07	0.03	0.06	0.05	0.05	0.59	0.97	0.44	0.98	0.94	0.32	0.28
cg09954385	PRR5	Pure Island	Within	0.07	0.2	0.2	0.07	0.04	0.03	0.04	0.04	0.05	0.05	0.04	0.93	0.95	0.03	0.36	0.1	0.07	0.05	0.15	0.11	0.06	0.93	0.25	0.93	0.04	0.04	0.04	0.06	0.03	0.41	0.03	0.94	0.07	0.04	0.04	0.04	0.06	0.03	0.03	0.09	0.93	0.05	0.05	0.08	0.12	0.06
cg09965258	NFIB	Pure Island	Within	0.08	0.08	0.06	0.17	0.06	0.07	0.06	0.06	0.06	0.19	0.03	0.06	0.83	0.04	0.08	0.13	0.08	0.07	0.1	0.1	0.07	0.08	0.04	0.02	0.03	0.04	0.08	0.03	0.03	0.03	0.03	0.03	0.07	0.04	0.04	0.04	0.06	0.3	0.07	0.05	0.06	0.08	0.05	0.27	0.16	0.04
cg09979256	RSPO3	Pure Island	Within	0.1	0.12	0.05	0.17	0.05	0.05	0.05	0.07	0.05	0.17	0.05	0.05	0.05	0.07	0.12	0.09	0.23	0.1	0.65	0.71	0.77	0.82	0.03	0.04	0.03	0.07	0.05	0.06	0.03	0.04	0.04	0.03	0.11	0.75	0.84	0.57	0.75	0.82	0.84	0.88	0.29	0.05	0.61	0.62	0.06	0.05
cg09980622	BOLA1	Pure Island	Within	0.06	0.05	0.03	0.1	0.03	0.02	0.03	0.03	0.03	0.09	0.02	0.02	0.03	0.14	0.06	0.03	0.04	0.03	0.07	0.05	0.06	0.95	0.02	0.01	0.01	0.02	0.01	0.2	0.01	0.02	0.02	0.75	0.05	0.03	0.01	0.03	0.06	0.01	0.85	0.03	0.95	0.02	0.02	0.05	0.64	0.02
cg09997760	GNB4	Pure Island	Within	0.18	0.24	0.06	0.07	0.05	0.04	0.04	0.04	0.05	0.04	0.04	0.07	0.05	0.05	0.29	0.14	0.15	0.09	0.86	0.64	0.9	0.88	0.02	0.04	0.03	0.5	0.03	0.02	0.03	0.03	0.07	0.03	0.07	0.63	0.96	0.96	0.92	0.09	0.92	0.94	0.97	0.04	0.84	0.85	0.08	0.03
cg09998229	TBXA2R	Pure Island	Within	0.08	0.05	0.06	0.06	0.05	0.05	0.05	0.05	0.04	0.02	0.03	0.15	0.04	0.04	0.11	0.06	0.05	0.05	0.1	0.06	0.09	0.04	0.02	0.02	0.03	0.03	0.03	0.02	0.02	0.02	0.03	0.02	0.04	0.06	0.03	0.03	0.08	0.76	0.03	0.04	0.03	0.07	0.02	0.05	0.06	0.04
cg10000775	PDLIM3	Pure Island	Within	0.12	0.19	0.08	0.05	0.05	0.05	0.05	0.05	0.04	0.03	0.05	0.06	0.88	0.16	0.12	0.07	0.12	0.06	0.1	0.11	0.57	0.88	0.13	0.05	0.05	0.07	0.05	0.05	0.05	0.04	0.05	0.04	0.05	0.07	0.89	0.19	0.82	0.07	0.88	0.88	0.05	0.05	0.67	0.17	0.11	0.07
cg10025443	SYK	Pure Island	Within	0.1	0.15	0.11	0.06	0.11	0.07	0.08	0.06	0.08	0.06	0.06	0.89	0.06	0.13	0.6	0.09	0.1	0.07	0.1	0.11	0.12	0.34	0.38	0.03	0.67	0.04	0.43	0.68	0.03	0.08	0.03	0.44	0.51	0.19	0.04	0.04	0.11	0.3	0.04	0.1	0.9	0.08	0.03	0.35	0.17	0.57
cg10035922	C1orf102	Pure Island	Within	0.12	0.09	0.06	0.08	0.06	0.06	0.07	0.06	0.07	0.12	0.06	0.07	0.68	0.06	0.09	0.11	0.22	0.06	0.13	0.12	0.09	0.08	0.04	0.03	0.03	0.05	0.04	0.03	0.03	0.04	0.04	0.04	0.07	0.04	0.04	0.08	0.08	0.07	0.06	0.06	0.06	0.08	0.05	0.25	0.11	0.06
cg10038087	TLL2	Pure Island	Within	0.07	0.09	0.1	0.09	0.11	0.09	0.08	0.08	0.07	0.07	0.03	0.1	0.06	0.06	0.54	0.06	0.09	0.07	0.14	0.09	0.08	0.3	0.03	0.04	0.04	0.04	0.05	0.03	0.04	0.03	0.04	0.04	0.07	0.05	0.06	0.05	0.05	0.04	0.04	0.05	0.05	0.05	0.06	0.16	0.94	0.03
cg10056627	GNMT	Pure Island	Within	0.13	0.14	0.05	0.03	0.03	0.04	0.03	0.03	0.04	0.05	0.05	0.92	0.97	0.03	0.9	0.12	0.11	0.08	0.39	0.56	0.18	0.92	0.58	0.02	0.97	0.03	0.47	0.75	0.06	0.51	0.04	0.97	0.11	0.53	0.03	0.4	0.06	0.1	0.09	0.21	0.97	0.26	0.05	0.88	0.16	0.24
cg10059959	PAX5	Pure Island	Within	0.06	0.15	0.16	0.1	0.07	0.07	0.07	0.1	0.05	0.1	0.07	0.3	0.88	0.6	0.3	0.81	0.18	0.35	0.16	0.08	0.78	0.84	0.47	0.84	0.15	0.89	0.05	0.79	0.18	0.9	0.04	0.81	0.02	0.09	0.56	0.49	0.05	0.4	0.26	0.89	0.86	0.37	0.81	0.8	0.45	0.04
cg10061117	SORL1	Pure Island	Within	0.02	0.02	0.02	0.01	0.06	0.05	0.06	0.08	0.04	0.03	0.08	0.03	0.05	0.33	0.5	0.08	0.3	0.02	0.03	0.02	0.01	0.85	0.06	0.72	0.01	0.03	0.03	0.04	0.01	0.03	0.01	0.16	0.65	0.1	0.01	0.01	0.04	0.03	0.01	0.02	0.98	0.02	0.02	0.31	0.06	0.15
cg10063179	MTNR1A	Pure Island	Within	0.09	0.1	0.07	0.05	0.1	0.08	0.08	0.07	0.09	0.09	0.05	0.89	0.91	0.11	0.61	0.09	0.1	0.8	0.11	0.07	0.27	0.88	0.26	0.03	0.07	0.05	0.07	0.18	0.04	0.04	0.04	0.07	0.03	0.04	0.23	0.12	0.09	0.73	0.03	0.76	0.07	0.06	0.04	0.26	0.13	0.09
cg10065416	MPP3	Pure Island	Within	0.08	0.12	0.06	0.04	0.03	0.03	0.05	0.04	0.03	0.02	0.06	0.15	0.23	0.09	0.45	0.15	0.56	0.06	0.47	0.11	0.13	0.33	0.36	0.02	0.03	0.11	0.02	0.1	0.07	0.07	0.36	0.33	0.02	0.03	0.08	0.44	0.09	0.09	0.16	0.42	0.16	0.06	0.33	0.16	0.12	0.1
cg10069638	NFIA	Pure Island	Within	0.1	0.09	0.05	0.1	0.03	0.04	0.04	0.04	0.05	0.09	0.03	0.05	0.15	0.04	0.11	0.09	0.08	0.08	0.1	0.12	0.12	0.11	0.02	0.03	0.03	0.03	0.04	0.02	0.03	0.02	0.03	0.02	0.09	0.03	0.03	0.03	0.04	0.04	0.05	0.03	0.04	0.04	0.03	0.06	0.05	0.03
cg10089145	ST14	Pure Island	Within	0.05	0.04	0.05	0.03	0.07	0.07	0.06	0.06	0.07	0.03	0.04	0.94	0.05	0.05	0.82	0.06	0.05	0.05	0.06	0.13	0.03	0.96	0.36	0.05	0.97	0.04	0.98	0.49	0.02	0.26	0.04	0.97	0.03	0.97	0.03	0.03	0.04	0.02	0.02	0.06	0.97	0.09	0.03	0.1	0.11	0.14
cg10095719	NRP1	Pure Island	Within	0.2	0.08	0.19	0.03	0.05	0.04	0.04	0.06	0.04	0.02	0.15	0.04	0.08	0.08	0.11	0.09	0.04	0.06	0.06	0.04	0.03	0.4	0.02	0.02	0.02	0.04	0.3	0.02	0.02	0.02	0.03	0.02	0.01	0.04	0.16	0.2	0.05	0.1	0.08	0.13	0.29	0.23	0.2	0.09	0.06	0.05
cg10104451	ARC	Pure Island	Within	0.14	0.14	0.07	0.19	0.06	0.06	0.06	0.1	0.12	0.1	0.05	0.07	0.07	0.05	0.14	0.07	0.18	0.07	0.08	0.07	0.11	0.06	0.02	0.12	0.04	0.05	0.15	0.04	0.04	0.04	0.08	0.04	0.1	0.03	0.04	0.12	0.08	0.09	0.3	0.14	0.1	0.12	0.03	0.23	0.07	0.08
cg10128164	COCH	Pure Island	Within	0.15	0.17	0.11	0.09	0.13	0.08	0.07	0.08	0.07	0.11	0.07	0.36	0.1	0.37	0.5	0.77	0.21	0.18	0.74	0.61	0.47	0.79	0.8	0.04	0.91	0.76	0.84	0.78	0.38	0.81	0.45	0.72	0.06	0.76	0.39	0.13	0.41	0.05	0.77	0.34	0.91	0.2	0.77	0.76	0.54	0.2
cg10139846	INADL	Pure Island	Within	0.08	0.1	0.04	0.05	0.03	0.04	0.03	0.04	0.04	0.04	0.03	0.05	0.07	0.03	0.17	0.08	0.06	0.08	0.11	0.15	0.13	0.1	0.02	0.02	0.02	0.03	0.03	0.02	0.03	0.02	0.03	0.02	0.04	0.03	0.03	0.03	0.04	0.05	0.03	0.03	0.03	0.05	0.02	0.15	0.11	0.04
cg10140638	PTPRN	Pure Island	Within	0.08	0.07	0.05	0.11	0.04	0.04	0.21	0.05	0.04	0.05	0.04	0.04	0.96	0.09	0.45	0.87	0.74	0.07	0.92	0.87	0.67	0.92	0.4	0.02	0.29	0.77	0.03	0.32	0.76	0.04	0.21	0.02	0.02	0.45	0.97	0.08	0.88	0.88	0.91	0.97	0.97	0.43	0.93	0.95	0.92	0.04
cg10154926	HAP1	Pure Island	Within	0.08	0.1	0.06	0.04	0.04	0.04	0.04	0.05	0.04	0.03	0.02	0.06	0.05	0.04	0.13	0.07	0.13	0.06	0.09	0.12	0.85	0.94	0.02	0.03	0.02	0.02	0.03	0.02	0.02	0.02	0.02	0.05	0.02	0.02	0.07	0.27	0.47	0.06	0.13	0.06	0.06	0.03	0.03	0.07	0.85	0.19
cg10158181	NOP14	Pure Island	Within	0.07	0.07	0.04	0.02	0.03	0.02	0.02	0.02	0.02	0.02	0.02	0.03	0.03	0.07	0.09	0.06	0.13	0.04	0.07	0.05	0.07	0.07	0.02	0.02	0.03	0.05	0.22	0.02	0.02	0.03	0.02	0.12	0.02	0.02	0.03	0.27	0.04	0.03	0.21	0.89	0.04	0.04	0.02	0.05	0.06	0.03
cg10164640	HPDL	Pure Island	Within	0.07	0.07	0.05	0.07	0.04	0.03	0.03	0.04	0.04	0.02	0.07	0.79	0.04	0.07	0.9	0.07	0.24	0.91	0.06	0.07	0.36	0.35	0.03	0.03	0.04	0.36	0.02	0.17	0.3	0.03	0.03	0.03	0.03	0.05	0.03	0.75	0.05	0.05	0.83	0.37	0.5	0.04	0.03	0.89	0.23	0.04
cg10167296	RASSF5	Pure Island	Within	0.07	0.24	0.2	0.04	0.02	0.03	0.03	0.04	0.02	0.03	0.14	0.88	0.52	0.52	0.89	0.82	0.09	0.48	0.59	0.18	0.9	0.91	0.38	0.03	0.47	0.94	0.33	0.56	0.28	0.29	0.15	0.93	0.79	0.39	0.14	0.45	0.94	0.68	0.36	0.04	0.79	0.14	0.03	0.7	0.07	0.03
cg10189695	GPR78	Pure Island	Within	0.1	0.07	0.08	0.05	0.04	0.03	0.03	0.06	0.03	0.02	0.06	0.07	0.94	0.24	0.38	0.07	0.31	0.06	0.51	0.4	0.85	0.91	0.79	0.01	0.12	0.03	0.36	0.43	0.02	0.02	0.18	0.05	0.16	0.03	0.54	0.46	0.87	0.25	0.95	0.95	0.97	0.08	0.96	0.85	0.92	0.54
cg10193817	CADM1	Pure Island	Within	0.06	0.09	0.07	0.03	0.03	0.04	0.04	0.03	0.04	0.03	0.14	0.08	0.96	0.91	0.06	0.06	0.91	0.05	0.05	0.06	0.94	0.05	0.14	0.03	0.03	0.04	0.03	0.03	0.03	0.03	0.04	0.05	0.03	0.03	0.05	0.03	0.9	0.03	0.03	0.04	0.96	0.05	0.33	0.81	0.1	0.08
cg10217445	OLIG2	Pure Island	Within	0.07	0.16	0.16	0.21	0.11	0.09	0.07	0.1	0.07	0.13	0.15	0.4	0.88	0.54	0.67	0.69	0.55	0.33	0.79	0.64	0.81	0.81	0.52	0.3	0.62	0.55	0.43	0.23	0.05	0.68	0.63	0.63	0.2	0.31	0.8	0.79	0.67	0.82	0.85	0.87	0.84	0.57	0.83	0.71	0.76	0.75
cg10227191	KRT18P19	Pure Island	Within	0.09	0.07	0.06	0.03	0.02	0.02	0.02	0.03	0.03	0.02	0.02	0.04	0.95	0.02	0.1	0.04	0.11	0.05	0.06	0.1	0.09	0.06	0.04	0.03	0.02	0.02	0.02	0.02	0.02	0.02	0.03	0.02	0.02	0.03	0.02	0.02	0.03	0.03	0.02	0.03	0.04	0.06	0.02	0.04	0.05	0.03
cg10238818	CYYR1	Pure Island	Within	0.07	0.08	0.05	0.06	0.03	0.03	0.03	0.03	0.08	0.04	0.06	0.04	0.92	0.54	0.72	0.64	0.08	0.84	0.84	0.82	0.85	0.88	0.61	0.92	0.88	0.48	0.94	0.93	0.03	0.9	0.23	0.92	0.97	0.45	0.87	0.84	0.86	0.91	0.88	0.93	0.95	0.92	0.38	0.8	0.76	0.62
cg10240853	MOSPD3	Pure Island	Within	0.2	0.03	0.03	0.03	0.04	0.04	0.07	0.05	0.03	0.02	0.06	0.04	0.16	0.16	0.17	0.4	0.79	0.05	0.61	0.39	0.91	0.88	0.04	0.07	0.4	0.75	0.02	0.42	0.14	0.19	0.22	0.95	0.03	0.16	0.36	0.88	0.8	0.14	0.24	0.6	0.39	0.04	0.77	0.74	0.2	0.1
cg10245048	TNFRSF10A	Pure Island	Within	0.11	0.21	0.18	0.05	0.05	0.04	0.04	0.04	0.04	0.05	0.04	0.85	0.05	0.04	0.65	0.09	0.13	0.08	0.12	0.11	0.11	0.13	0.04	0.07	0.04	0.04	0.04	0.04	0.04	0.04	0.04	0.05	0.05	0.08	0.04	0.04	0.14	0.04	0.04	0.06	0.03	0.07	0.04	0.08	0.08	0.04
cg10247252	GALR2	Pure Island	Within	0.21	0.08	0.06	0.04	0.1	0.11	0.19	0.06	0.08	0.09	0.06	0.19	0.53	0.11	0.09	0.62	0.62	0.68	0.87	0.59	0.68	0.68	0.3	0.51	0.57	0.76	0.85	0.48	0.2	0.16	0.07	0.47	0.97	0.36	0.32	0.07	0.23	0.63	0.45	0.87	0.93	0.46	0.3	0.76	0.6	0.36
cg10266068	PGPEP1	Pure Island	Within	0.09	0.17	0.14	0.13	0.15	0.14	0.13	0.14	0.13	0.09	0.05	0.19	0.12	0.08	0.11	0.08	0.11	0.11	0.13	0.1	0.11	0.13	0.04	0.03	0.05	0.06	0.09	0.06	0.04	0.04	0.05	0.05	0.17	0.07	0.05	0.05	0.16	0.07	0.07	0.06	0.07	0.1	0.06	0.21	0.11	0.08
cg10273210	TRIM59	Pure Island	Within	0.06	0.06	0.04	0.02	0.03	0.03	0.02	0.04	0.03	0.02	0.03	0.59	0.35	0.05	0.48	0.06	0.07	0.06	0.19	0.14	0.52	0.83	0.04	0.15	0.03	0.04	0.58	0.09	0.04	0.03	0.04	0.04	0.02	0.38	0.03	0.14	0.1	0.88	0.06	0.04	0.64	0.04	0.04	0.11	0.09	0.68
cg10293925	AMPH	Pure Island	Within	0.06	0.07	0.07	0.02	0.05	0.04	0.05	0.05	0.06	0.03	0.09	0.05	0.06	0.08	0.24	0.07	0.62	0.05	0.93	0.92	0.9	0.9	0.31	0.02	0.04	0.03	0.03	0.45	0.02	0.02	0.03	0.02	0.02	0.93	0.97	0.95	0.93	0.96	0.98	0.96	0.78	0.77	0.93	0.88	0.51	0.05
cg10294797	MAP3K9	Pure Island	Within	0.06	0.06	0.04	0.03	0.03	0.03	0.03	0.03	0.03	0.02	0.03	0.04	0.03	0.03	0.06	0.04	0.08	0.04	0.05	0.07	0.06	0.06	0.01	0.02	0.02	0.02	0.02	0.02	0.02	0.02	0.02	0.05	0.02	0.02	0.02	0.03	0.04	0.03	0.02	0.03	0.61	0.04	0.02	0.06	0.04	0.02
cg10294836	DYRK1B	Pure Island	Within	0.11	0.09	0.11	0.12	0.08	0.09	0.1	0.08	0.11	0.14	0.05	0.33	0.9	0.43	0.9	0.09	0.09	0.09	0.11	0.13	0.1	0.9	0.05	0.05	0.06	0.07	0.06	0.07	0.05	0.85	0.07	0.91	0.07	0.06	0.94	0.94	0.11	0.93	0.93	0.08	0.9	0.12	0.06	0.67	0.09	0.73
cg10300684	FOXG1B	Pure Island	Within	0.17	0.15	0.07	0.2	0.08	0.08	0.11	0.08	0.06	0.04	0.06	0.89	0.9	0.47	0.65	0.84	0.68	0.63	0.8	0.53	0.82	0.85	0.31	0.36	0.57	0.86	0.78	0.26	0.92	0.75	0.05	0.91	0.05	0.04	0.87	0.87	0.81	0.88	0.86	0.86	0.67	0.69	0.82	0.73	0.62	0.28
cg10303487	DPYS	Pure Island	Within	0.03	0.04	0.02	0.07	0.03	0.03	0.02	0.05	0.03	0.01	0.03	0.89	0.99	0.98	0.91	0.88	0.84	0.16	0.94	0.97	0.95	0.98	0.49	0.98	0.58	0.98	0.99	0.8	0.66	0.11	0.75	0.98	0.99	0.98	0.97	0.82	0.86	0.98	0.98	0.98	0.99	0.74	0.87	0.88	0.84	0.41
cg10313673	CILP2	Pure Island	Within	0.04	0.12	0.05	0.03	0.06	0.06	0.06	0.07	0.08	0.03	0.15	0.95	0.97	0.46	0.94	0.9	0.04	0.64	0.14	0.09	0.92	0.94	0.53	0.01	0.98	0.97	0.02	0.47	0.59	0.96	0.04	0.98	0.6	0.1	0.98	0.95	0.95	0.97	0.95	0.93	0.98	0.38	0.77	0.47	0.67	0.92
cg10314752	PPP4R4	Pure Island	Within	0.06	0.06	0.06	0.03	0.06	0.05	0.06	0.06	0.05	0.03	0.04	0.05	0.05	0.07	0.06	0.08	0.16	0.06	0.12	0.08	0.1	0.08	0.05	0.05	0.07	0.06	0.04	0.04	0.05	0.05	0.06	0.08	0.03	0.05	0.16	0.06	0.13	0.07	0.61	0.07	0.06	0.06	0.06	0.09	0.09	0.06
cg10316635	INADL	Pure Island	Within	0.09	0.05	0.06	0.02	0.03	0.03	0.03	0.03	0.03	0.02	0.02	0.23	0.64	0.04	0.58	0.06	0.07	0.06	0.08	0.14	0.1	0.09	0.03	0.06	0.02	0.04	0.03	0.02	0.03	0.03	0.03	0.31	0.02	0.03	0.02	0.03	0.06	0.05	0.03	0.04	0.03	0.04	0.04	0.06	0.04	0.03
cg10319505	RASEF	Pure Island	Within	0.05	0.05	0.05	0.03	0.03	0.03	0.03	0.03	0.04	0.04	0.06	0.4	0.95	0.03	0.74	0.04	0.05	0.03	0.27	0.13	0.07	0.82	0.34	0.02	0.02	0.03	0.03	0.19	0.02	0.03	0.08	0.06	0.52	0.03	0.02	0.05	0.04	0.92	0.03	0.03	0.92	0.04	0.03	0.84	0.1	0.48
cg10356060	DNAJC18	Pure Island	Within	0.11	0.1	0.04	0.08	0.04	0.04	0.04	0.04	0.04	0.14	0.02	0.94	0.05	0.03	0.11	0.07	0.09	0.07	0.09	0.11	0.1	0.08	0.02	0.03	0.02	0.03	0.04	0.02	0.02	0.02	0.03	0.03	0.07	0.03	0.03	0.03	0.05	0.03	0.04	0.03	0.03	0.05	0.03	0.11	0.08	0.04
cg10362591	SLC6A2	Pure Island	Within	0.09	0.09	0.07	0.08	0.03	0.04	0.04	0.04	0.05	0.05	0.06	0.6	0.96	0.35	0.32	0.46	0.08	0.1	0.92	0.96	0.96	0.97	0.81	0.05	0.67	0.93	0.5	0.8	0.03	0.07	0.43	0.2	0.43	0.97	0.96	0.89	0.92	0.98	0.98	0.98	0.97	0.6	0.82	0.94	0.88	0.25
cg10432620	FA2H	Pure Island	Within	0.05	0.09	0.07	0.03	0.03	0.03	0.04	0.03	0.03	0.02	0.03	0.11	0.04	0.03	0.53	0.08	0.09	0.05	0.07	0.07	0.06	0.08	0.13	0.03	0.02	0.03	0.04	0.21	0.02	0.03	0.03	0.31	0.02	0.02	0.03	0.02	0.04	0.03	0.02	0.04	0.2	0.05	0.03	0.08	0.09	0.06
cg10481417	CYP1A1	Associated Island	Within	0.04	0.05	0.03	0.03	0.03	0.03	0.02	0.02	0.02	0.02	0.03	0.03	0.03	0.03	0.26	0.04	0.05	0.03	0.06	0.05	0.05	0.04	0.18	0.02	0.02	0.02	0.02	0.02	0.39	0.02	0.02	0.02	0.01	0.02	0.02	0.02	0.04	0.02	0.03	0.17	0.03	0.03	0.03	0.1	0.11	0.02
cg10501128	FLT1	Pure Island	Within	0.05	0.05	0.04	0.03	0.02	0.03	0.04	0.04	0.03	0.03	0.02	0.27	0.04	0.1	0.11	0.07	0.06	0.05	0.27	0.11	0.85	0.88	0.16	0.03	0.07	0.02	0.03	0.04	0.02	0.02	0.02	0.03	0.04	0.02	0.06	0.03	0.25	0.1	0.04	0.16	0.28	0.04	0.67	0.63	0.1	0.13
cg10520887	UNC5C	Pure Island	Within	0.07	0.04	0.05	0.09	0.08	0.08	0.07	0.08	0.09	0.1	0.1	0.06	0.87	0.11	0.17	0.07	0.1	0.06	0.73	0.56	0.78	0.78	0.15	0.43	0.03	0.04	0.05	0.15	0.02	0.04	0.04	0.02	0.05	0.34	0.7	0.58	0.63	0.84	0.74	0.92	0.93	0.07	0.79	0.8	0.52	0.18
cg10523820	ACTN3	Pure Island	Within	0.07	0.08	0.04	0.06	0.03	0.04	0.03	0.05	0.03	0.11	0.03	0.25	0.47	0.04	0.33	0.64	0.11	0.12	0.57	0.11	0.46	0.11	0.13	0.94	0.1	0.25	0.92	0.03	0.19	0.1	0.02	0.16	0.87	0.15	0.05	0.1	0.08	0.9	0.43	0.07	0.9	0.04	0.03	0.7	0.08	0.18
cg10524192	SIGMAR1	Pure Island	Within	0.06	0.04	0.03	0.01	0.02	0.02	0.02	0.02	0.02	0.01	0.02	0.03	0.03	0.02	0.06	0.63	0.06	0.04	0.08	0.07	0.06	0.05	0.01	0.02	0.02	0.86	0.01	0.02	0.02	0.02	0.02	0.02	0.01	0.02	0.02	0.02	0.04	0.03	0.02	0.08	0.03	0.03	0.02	0.04	0.04	0.02
cg10530281	TBX3	Pure Island	Within	0.17	0.12	0.08	0.18	0.08	0.09	0.08	0.07	0.08	NA	0.05	0.35	0.5	0.08	0.16	0.11	0.57	0.07	0.2	0.18	0.13	0.18	0.11	0.05	0.03	0.03	0.04	0.03	0.03	0.03	0.06	0.03	0.11	0.03	0.06	0.07	0.13	0.08	0.06	0.07	0.92	0.06	0.93	0.1	0.72	0.34
cg10539418	CCND1	Pure Island	Within	0.06	0.06	0.06	0.08	0.04	0.03	0.03	0.04	0.03	0.02	0.03	0.12	0.05	0.03	0.09	0.06	0.06	0.06	0.12	0.06	0.09	0.07	0.02	0.04	0.03	0.03	0.02	0.02	0.02	0.03	0.04	0.02	0.16	0.04	0.03	0.03	0.08	0.04	0.03	0.04	0.06	0.05	0.04	0.09	0.05	0.03
cg10539712	LYN	Pure Island	Within	0.04	0.05	0.04	0.06	0.06	0.06	0.07	0.09	0.06	0.02	0.03	0.04	0.07	0.04	0.05	0.1	0.06	0.07	0.08	0.07	0.06	0.02	0.01	0.03	0.02	0.34	0.08	0.02	0.03	0.03	0.03	0.04	0.04	0.02	0.02	0.03	0.06	0.03	0.02	0.04	0.02	0.03	0.02	0.09	0.08	0.04
cg10544564	CADM3	Pure Island	Within	0.1	0.14	0.04	NA	0.1	0.11	0.07	0.11	0.08	0.19	0.03	0.07	0.22	0.06	0.07	0.1	0.12	0.05	0.45	NA	NA	NA	0.09	0.02	0.06	0.11	0.07	0.09	0.05	0.03	0.04	0.05	NA	0.05	0.22	0.12	0.41	0.55	0.24	0.64	0.85	0.07	0.06	NA	0.29	0.52
cg10549973	TOMM20L	Pure Island	Within	0.09	0.19	0.24	0.15	0.03	0.04	0.02	0.03	0.02	0.02	0.06	0.92	0.41	0.63	0.94	0.07	0.04	0.15	0.21	0.75	0.3	0.95	0.66	0.93	0.8	0.31	0.61	0.94	0.46	0.75	0.09	0.97	0.02	0.96	0.04	0.89	0.06	0.05	0.15	0.51	0.96	0.56	0.55	0.93	0.48	0.95
cg10604168	RASL12	Pure Island	Within	0.09	0.16	0.17	0.05	0.06	0.07	0.06	0.06	0.07	0.06	0.11	0.9	0.94	0.41	0.91	0.65	0.83	0.2	0.88	0.72	0.87	0.91	0.9	0.06	0.67	0.92	0.1	0.5	0.11	0.12	0.39	0.92	0.97	0.92	0.94	0.39	0.91	0.45	0.92	0.68	0.92	0.1	0.8	0.88	0.85	0.05
cg10639440	SCRN1	Pure Island	Within	0.16	0.17	0.07	0.09	0.11	0.09	0.08	0.09	0.08	0.07	0.06	0.07	0.07	0.33	0.12	0.09	0.11	0.11	0.12	0.15	0.49	0.93	0.03	0.03	0.05	0.05	0.05	0.03	0.03	0.04	0.04	0.39	0.04	0.05	0.05	0.04	0.39	0.05	0.08	0.05	0.06	0.05	0.03	0.24	0.1	0.04
cg10644361	MIPOL1	Pure Island	Within	0.08	0.07	0.05	0.03	0.03	0.04	0.03	0.04	0.04	0.02	0.06	0.05	0.97	0.05	0.06	0.07	0.08	0.06	0.35	0.59	0.94	0.09	0.03	0.03	0.04	0.03	0.03	0.03	0.03	0.03	0.03	0.03	0.02	0.04	0.03	0.04	0.25	0.03	0.97	0.05	0.21	0.04	0.03	0.17	0.04	0.03
cg10646402	PTPRO	Pure Island	Within	0.05	0.08	0.04	0.02	0.03	0.02	0.05	0.07	0.02	0.02	0.06	0.72	0.97	0.05	0.37	0.94	0.23	0.95	0.91	0.93	0.95	0.96	0.41	0.01	0.07	0.97	0.08	0.32	0.02	0.03	0.04	0.04	0.01	0.06	0.95	0.87	0.95	0.95	0.95	0.96	0.79	0.12	0.3	0.87	0.87	0.02
cg10648908	ARFGAP3	Pure Island	Within	0.06	0.06	0.05	0.02	0.05	0.05	0.06	0.06	0.05	0.02	0.07	0.03	0.04	0.09	0.08	0.09	0.07	0.06	0.07	0.06	0.08	0.08	0.02	0.02	0.02	0.04	0.02	0.02	0.02	0.02	0.04	0.03	0.01	0.02	0.04	0.07	0.06	0.09	0.04	0.05	0.03	0.07	0.03	0.07	0.06	0.05
cg10660136	C2orf52	Pure Island	Within	0.05	0.06	0.04	0.01	0.03	0.02	0.02	0.03	0.02	0.01	0.02	0.03	0.03	0.02	0.06	0.04	0.04	0.04	0.08	0.06	0.94	0.44	0.02	0.02	0.02	0.02	0.01	0.02	0.02	0.02	0.02	0.02	0.02	0.02	0.02	0.02	0.48	0.02	0.54	0.02	0.02	0.03	0.02	0.07	0.04	0.02
cg10682057	NAAA	Pure Island	Within	0.05	0.06	0.05	0.02	0.03	0.02	0.02	0.02	0.02	0.02	0.02	0.97	0.03	0.05	0.95	0.05	0.07	0.05	0.08	0.06	0.06	0.04	0.6	0.02	0.02	0.02	0.02	0.02	0.02	0.02	0.02	0.02	0.01	0.47	0.03	0.05	0.06	0.04	0.06	0.03	0.09	0.04	0.02	0.04	0.05	0.03
cg10685945	AGPAT9	Pure Island	Within	0.11	0.1	0.06	0.13	0.06	0.09	0.06	0.07	0.07	0.1	0.09	0.04	0.69	0.07	0.1	0.1	0.17	0.08	0.16	0.15	0.16	0.13	0.04	0.03	0.04	0.13	0.05	0.03	0.03	0.03	0.03	0.03	0.07	0.08	0.05	0.07	0.05	0.07	0.17	0.07	0.12	0.05	0.05	0.08	0.1	0.05
cg10688991	DLX3	Pure Island	Within	0.06	0.05	0.03	0.02	0.03	0.02	0.02	0.03	0.02	0.03	0.04	0.77	0.1	0.03	0.13	0.04	0.06	0.04	0.08	0.07	0.94	0.97	0.04	0.01	0.07	0.02	0.02	0.53	0.01	0.01	0.21	0.02	0.01	0.01	0.03	0.09	0.07	0.03	0.06	0.38	0.96	0.03	0.05	0.6	0.04	0.04
cg10689889	MAF	Pure Island	Within	0.05	0.08	0.05	0.04	0.03	0.03	0.03	0.03	0.02	0.06	0.03	0.03	0.04	0.03	0.07	0.05	0.15	0.03	0.08	0.04	0.78	0.3	0.09	0.02	0.03	0.02	0.03	0.02	0.01	0.01	0.02	0.02	0.03	0.02	0.03	0.03	0.25	0.03	0.02	0.04	0.94	0.04	0.03	0.72	0.05	0.8
cg10708905	LRIG3	Pure Island	Within	0.15	0.15	0.09	0.05	0.06	0.06	0.05	0.07	0.04	0.03	0.05	0.08	0.9	0.06	0.16	0.09	0.14	0.09	0.5	0.34	0.12	0.09	0.46	0.05	0.05	0.05	0.04	0.05	0.05	0.05	0.05	0.05	0.04	0.05	0.07	0.06	0.11	0.06	0.04	0.07	0.64	0.1	0.04	0.13	0.12	0.05
cg10730174	PRRX1	Pure Island	Within	0.09	0.08	0.06	0.08	0.03	0.04	0.04	0.04	0.04	0.07	0.04	0.05	0.95	0.1	0.66	0.6	0.16	0.04	0.17	0.09	0.91	0.89	0.16	0.63	0.22	0.88	0.03	0.18	0.02	0.04	0.03	0.24	0.03	0.03	0.05	0.08	0.34	0.91	0.28	0.92	0.96	0.22	0.71	0.8	0.19	0.57
cg10741760	HTR6	Pure Island	Within	0.12	0.14	0.07	NA	0.18	0.12	0.12	0.15	0.16	0.16	0.13	0.59	0.79	0.73	0.53	0.78	0.69	0.21	0.86	NA	0.91	0.96	0.65	0.81	0.32	0.84	0.88	0.82	0.35	0.62	0.21	0.9	NA	0.14	0.79	0.92	0.51	0.95	0.9	0.89	0.93	0.66	0.67	0.86	0.48	0.28
cg10743104	PDPN	Pure Island	Within	0.06	0.1	0.06	0.03	0.04	0.05	0.04	0.04	0.03	0.04	0.04	0.28	0.94	0.48	0.25	0.68	0.11	0.21	0.89	0.29	0.7	0.91	0.5	0.82	0.85	0.85	0.83	0.57	0.78	0.27	0.09	0.31	0.06	0.35	0.83	0.78	0.45	0.92	0.92	0.41	0.92	0.63	0.12	0.83	0.12	0.45
cg10775273	CRYBA2	Pure Island	Within	0.04	0.02	0.01	0.02	0.03	0.02	0.02	0.02	0.02	0.01	0.02	0.94	0.98	0.85	0.81	0.96	0.39	0.86	0.8	0.08	0.96	0.94	0.52	0.86	0.97	0.98	0.99	0.97	0.99	0.98	0.03	0.98	0.01	0.01	0.34	0.96	0.02	0.97	0.99	0.59	0.99	0.88	0.99	0.93	0.8	0.47
cg10810921	CRLF1	Pure Island	Within	0.05	0.03	0.02	0.01	0.02	0.02	0.02	0.03	0.02	0.01	0.03	0.02	0.11	0.02	0.21	0.03	0.04	0.03	0.05	0.06	0.84	0.95	0.03	0.01	0.02	0.01	0.01	0.02	0.01	0.01	0.03	0.02	0.01	0.02	0.95	0.02	0.34	0.05	0.97	0.25	0.02	0.02	0.02	0.04	0.13	0.01
cg10812811	C20orf112	Pure Island	Within	0.09	0.07	0.05	0.06	0.04	0.05	0.04	0.05	0.05	0.04	0.03	0.05	0.04	0.04	0.1	0.37	0.08	0.05	0.07	0.09	0.06	0.37	0.03	0.02	0.02	0.92	0.03	0.02	0.02	0.03	0.03	0.03	0.04	0.08	0.03	0.78	0.05	0.03	0.35	0.25	0.89	0.04	0.04	0.07	0.07	0.03
cg10845200	DRD1IP	Pure Island	Within	0.09	0.05	0.05	0.02	0.02	0.02	0.02	0.02	0.02	0.01	0.02	0.03	0.23	0.05	0.06	0.39	0.12	0.04	0.05	0.06	0.87	0.92	0.02	0.02	0.01	0.74	0.02	0.01	0.01	0.01	0.02	0.02	0.02	0.02	0.06	0.12	0.42	0.13	0.51	0.63	0.77	0.02	0.22	0.79	0.87	0.02
cg10861017	ZNF420	Pure Island	Within	0.12	0.11	0.09	0.16	0.13	0.14	0.14	0.15	0.14	0.24	0.17	0.1	0.1	0.12	0.12	0.09	0.08	0.12	0.1	0.15	0.9	0.11	0.04	0.04	0.56	0.11	0.07	0.22	0.25	0.04	0.17	0.05	0.14	0.05	0.29	0.93	0.83	0.91	0.09	0.13	0.06	0.08	0.08	0.8	0.1	0.06
cg10866709	GATA4	Pure Island	Within	0.09	0.08	0.06	0.05	0.13	0.09	0.09	0.11	0.05	0.09	0.04	0.06	0.8	0.1	0.11	0.56	0.19	0.64	0.58	0.28	0.41	0.08	0.14	0.23	0.11	0.76	0.04	0.03	0.52	0.18	0.13	0.67	0.06	0.06	0.23	0.21	0.19	0.82	0.2	0.04	0.06	0.07	0.04	0.58	0.33	0.32
cg10918202	BAALC	Pure Island	Within	0.06	0.03	0.03	0.03	0.08	0.09	0.09	0.16	0.1	0.03	0.14	0.13	0.03	0.34	0.68	0.63	0.61	0.13	0.79	0.49	0.93	0.97	0.52	0.02	0.79	0.92	0.26	0.57	0.02	0.03	0.06	0.87	0.01	0.92	0.95	0.88	0.85	0.96	0.98	0.96	0.94	0.52	0.96	0.79	0.57	0.55
cg10918419	C8orf55	Pure Island	Within	0.14	0.1	0.08	0.05	0.04	0.04	0.05	0.04	0.04	0.04	0.07	0.06	0.06	0.07	0.1	0.07	0.09	0.06	0.1	0.15	0.08	0.12	0.05	0.03	0.04	0.03	0.03	0.05	0.4	0.03	0.04	0.04	0.03	0.04	0.08	0.08	0.08	0.06	0.12	0.08	0.05	0.07	0.05	0.1	0.18	0.04
cg10920957	JPH3	Pure Island	Within	0.11	0.1	0.1	0.16	0.05	0.05	0.05	0.04	0.05	0.03	0.03	0.49	0.49	0.3	0.89	0.86	0.56	0.38	0.86	0.17	0.86	0.89	0.64	0.79	0.57	0.91	0.67	0.59	0.26	0.5	0.06	0.88	0.84	0.04	0.91	0.89	0.89	0.53	0.93	0.9	0.92	0.66	0.5	0.91	0.75	0.43
cg10943191	TMEM52	Pure Island	Within	0.05	0.04	0.04	0.01	0.05	0.06	0.06	0.04	0.05	0.02	0.04	0.74	0.05	0.12	0.63	0.04	0.05	0.04	0.07	0.04	0.04	0.03	0.03	0.02	0.08	0.03	0.03	0.04	0.02	0.06	0.02	0.29	0.02	0.02	0.02	0.02	0.03	0.02	0.04	0.95	0.95	0.03	0.03	0.05	0.07	0.42
cg10947146	XKR6	Pure Island	Within	0.09	0.15	0.1	0.03	0.03	0.02	0.03	0.02	0.03	0.02	0.02	0.67	0.98	0.04	0.14	0.26	0.09	0.62	0.89	0.89	0.94	0.09	0.02	0.79	0.7	0.98	0.68	0.46	0.02	0.02	0.62	0.03	0.18	0.05	0.03	0.98	0.05	0.96	0.98	0.02	0.98	0.04	0.02	0.9	0.04	0.93
cg10954182	AC089983.23-1	No/Distant Island	Within	0.07	0.07	0.12	0.14	0.08	0.15	0.09	0.16	0.09	0.14	0.17	0.22	0.21	0.45	0.49	0.44	0.31	0.36	0.71	0.49	0.35	0.42	0.19	0.08	0.22	0.53	0.05	0.49	0.54	0.32	0.31	0.38	0.22	0.34	0.5	0.18	0.36	0.05	0.5	0.53	0.17	0.11	0.38	0.71	0.61	0.06
cg10962407	ICA1L	Pure Island	Within	0.02	0.02	0.02	0.05	0.02	0.02	0.02	0.02	0.03	0.01	0.03	0.02	0.01	0.03	0.03	0.03	0.12	0.03	0.03	0.03	0.01	0.02	0.01	0.01	0.01	0.04	0.03	0.01	0.02	0.01	0.02	0.02	0.01	0.04	0.04	0.33	0.04	0.02	0.02	0.29	0.02	0.02	0.02	0.31	0.04	0.03
cg10964421	TNFRSF10D	Pure Island	Within	0.23	0.25	0.16	0.08	0.13	0.12	0.11	0.12	0.11	0.12	0.06	0.84	0.23	0.08	0.86	0.83	0.37	0.87	0.26	0.33	0.29	0.29	0.05	0.58	0.04	0.9	0.08	0.07	0.36	0.04	0.06	0.06	0.92	0.15	0.12	0.05	0.17	0.08	0.11	0.09	0.17	0.1	0.08	0.19	0.21	0.08
cg10972353	SCD5	Pure Island	Within	0.04	0.04	0.02	0.08	0.03	0.04	0.03	0.03	0.03	0.02	0.02	0.02	0.02	0.02	0.04	0.05	0.03	0.03	0.04	0.03	0.34	0.03	0.01	0.01	0.01	0.02	0.05	0.01	0.01	0.01	0.05	0.01	0.02	0.01	0.03	0.02	0.59	0.02	0.02	0.03	0.02	0.03	0.01	0.03	0.04	0.02
cg10999429	ACVRL1	Pure Island	Within	0.03	0.03	0.02	0.01	0.05	0.05	0.05	0.05	0.05	0.02	0.03	0.15	0.86	0.05	0.05	0.09	0.04	0.04	0.55	0.26	0.04	0.1	0.11	0.5	0.03	0.08	0.03	0.19	0.45	0.02	0.04	0.16	0.4	0.07	0.03	0.21	0.05	0.59	0.05	0.09	0.77	0.04	0.03	0.19	0.11	0.22
cg11011938	SEMA5A	Pure Island	Within	0.06	0.06	0.04	0.02	0.02	0.03	0.03	0.04	0.04	0.02	0.03	0.04	0.88	0.1	0.24	0.09	0.8	0.37	0.71	0.48	0.47	0.91	0.11	0.11	0.04	0.41	0.04	0.06	0.03	0.03	0.04	0.41	0.06	0.03	0.11	0.04	0.26	0.25	0.04	0.88	0.84	0.04	0.85	0.68	0.09	0.15
cg11012046	GLB1L2	Pure Island	Within	0.08	0.08	0.06	0.12	0.09	0.07	0.13	0.08	0.06	0.1	0.04	0.84	0.96	0.2	0.87	0.08	0.48	0.22	0.07	0.06	0.08	0.07	0.05	0.02	0.47	0.05	0.59	0.05	0.03	0.05	0.03	0.05	0.48	0.05	0.05	0.06	0.05	0.03	0.06	0.09	0.88	0.06	0.04	0.14	0.05	0.12
cg11016563	TRPC6	Pure Island	Within	0.08	0.08	0.07	0.19	0.08	0.1	0.08	0.09	0.08	0.18	0.11	0.08	0.84	0.34	0.41	0.09	0.35	0.34	0.74	0.75	0.49	0.77	0.4	0.07	0.05	0.14	0.08	0.31	0.1	0.06	0.08	0.45	0.27	0.45	0.83	0.73	0.77	0.74	0.83	0.84	0.85	0.57	0.57	0.67	0.15	0.32
cg11017269	RHOBTB3	Pure Island	Within	0.06	0.04	0.11	0.02	0.03	0.03	0.03	0.03	0.03	0.01	0.07	0.05	0.04	0.05	0.08	0.06	0.05	0.03	0.05	0.04	0.04	0.06	0.02	0.02	0.02	0.02	0.02	0.02	0.02	0.02	0.02	0.02	0.01	0.03	0.09	0.09	0.12	0.09	0.03	0.08	0.09	0.14	0.06	0.06	0.11	0.02
cg11053574	NT5C3L	Pure Island	Within	0.06	0.08	0.04	0.03	0.04	0.03	0.03	0.02	0.02	0.02	0.02	0.03	0.03	0.02	0.06	0.04	0.06	0.03	0.06	0.04	0.45	0.03	0.02	0.02	0.02	0.06	0.03	0.02	0.02	0.02	0.02	0.02	0.02	0.02	0.02	0.02	0.11	0.16	0.18	0.04	0.02	0.05	0.34	0.05	0.05	0.03
cg11059483	ESR2	Pure Island	Within	0.13	0.16	0.09	0.11	0.06	0.09	0.08	0.09	0.09	0.14	0.16	0.92	0.1	0.9	0.89	0.88	0.88	0.12	0.31	0.22	0.9	0.92	0.2	0.05	0.84	0.94	0.67	0.42	0.04	0.76	0.25	0.92	0.07	0.85	0.36	0.93	0.14	0.1	0.56	0.91	0.94	0.12	0.52	0.69	0.07	0.08
cg11065385	B4GALNT3	Pure Island	Within	0.12	0.07	0.03	0.08	0.04	0.04	0.03	0.05	0.11	0.02	0.09	0.24	0.28	0.29	0.38	0.08	0.09	0.04	0.16	0.37	0.15	0.3	0.13	0.17	0.05	0.05	0.03	0.13	0.06	0.1	0.15	0.86	0.02	0.07	0.16	0.11	0.09	0.03	0.31	0.74	0.63	0.06	0.08	0.16	0.09	0.15
cg11070941	STX11	Pure Island	Within	0.09	0.09	0.04	0.04	0.04	0.04	0.05	0.06	0.06	0.06	0.04	0.05	0.05	0.11	0.11	0.07	0.4	0.07	0.09	0.13	0.92	0.4	0.02	0.05	0.03	0.04	0.05	0.02	0.04	0.03	0.03	0.03	0.12	0.03	0.04	0.03	0.14	0.04	0.04	0.11	0.05	0.04	0.05	0.07	0.09	0.03
cg11078738	ANTXR1	Pure Island	Within	0.09	0.1	0.06	0.04	0.05	0.04	0.05	0.04	0.03	0.03	0.09	0.06	0.05	0.11	0.11	0.15	0.12	0.07	0.61	0.38	0.65	0.84	0.22	0.05	0.07	0.07	0.03	0.06	0.05	0.05	0.06	0.06	0.03	0.06	0.9	0.38	0.85	0.67	0.91	0.12	0.05	0.06	0.03	0.06	0.06	0.05
cg11104347	DUSP23	Pure Island	Within	0.05	0.05	0.06	0.02	0.04	0.03	0.03	0.03	0.03	0.03	0.05	0.9	0.04	0.04	0.88	0.05	0.05	0.04	0.06	0.12	0.06	0.52	0.03	0.02	0.03	0.03	0.03	0.02	0.03	0.05	0.03	0.8	0.03	0.16	0.04	0.04	0.04	0.03	0.35	0.04	0.48	0.06	0.04	0.06	0.07	0.03
cg11140785	ZNF264	Pure Island	Within	0.07	0.05	0.03	0.01	0.03	0.03	0.03	0.04	0.03	0.02	0.02	0.03	0.16	0.03	0.08	0.73	0.04	0.06	0.93	0.93	0.93	0.07	0.01	0.02	0.54	0.92	0.02	0.01	0.02	0.02	0.06	0.02	0.99	0.02	0.02	0.97	0.44	0.14	0.63	0.02	0.03	0.02	0.02	0.09	0.04	0.02
cg11154798	RAI14	Pure Island	Within	0.16	0.15	0.12	0.07	0.06	0.06	0.05	0.06	0.05	0.04	0.03	0.1	0.09	0.06	0.17	0.08	0.12	0.11	0.14	0.19	0.19	0.16	0.03	0.03	0.03	0.04	0.04	0.03	0.03	0.03	0.03	0.03	0.04	0.03	0.05	0.04	0.08	0.04	0.04	0.05	0.05	0.05	0.04	0.1	0.07	0.03
cg11166252	AHR	Pure Island	Within	0.12	0.11	0.05	0.08	0.03	0.03	0.03	0.03	0.04	0.04	0.03	0.97	0.68	0.03	0.59	0.06	0.08	0.06	0.09	0.15	0.11	0.94	0.02	0.02	0.02	0.02	0.03	0.02	0.03	0.01	0.02	0.02	0.03	0.02	0.02	0.02	0.03	0.02	0.03	0.02	0.52	0.03	0.02	0.04	0.09	0.02
cg11166823	AGPAT3	Pure Island	Within	0.04	0.04	0.03	0.02	0.04	0.04	0.03	0.03	0.03	0.01	0.02	0.8	0.03	0.03	0.11	0.04	0.07	0.03	0.07	0.05	0.04	0.04	0.04	0.02	0.02	0.03	0.02	0.02	0.02	0.02	0.02	0.03	0.02	0.02	0.02	0.02	0.06	0.02	0.02	0.03	0.03	0.03	0.02	0.12	0.05	0.03
cg11171719	CTDSPL	Pure Island	Within	0.05	0.07	0.03	0.02	0.03	0.03	0.02	0.06	0.02	0.02	0.02	0.03	0.03	0.03	0.05	0.04	0.05	0.04	0.06	0.06	0.07	0.05	0.02	0.02	0.02	0.03	0.02	0.02	0.03	0.02	0.03	0.03	0.01	0.02	0.03	0.03	0.03	0.02	0.02	0.03	0.02	0.04	0.03	0.1	0.04	0.03
cg11185569	CHN2	Pure Island	Within	0.09	0.08	0.06	0.03	0.04	0.04	0.03	0.04	0.04	0.02	0.03	0.74	0.67	0.04	0.23	0.16	0.07	0.06	0.26	0.08	0.09	0.94	0.22	0.03	0.03	0.35	0.03	0.12	0.03	0.03	0.03	0.04	0.03	0.03	0.07	0.07	0.04	0.05	0.04	0.06	0.36	0.04	0.03	0.49	0.07	0.08
cg11199399	LTBP1	Pure Island	Within	0.1	0.08	0.14	0.05	0.09	0.09	0.1	0.09	0.08	0.04	0.15	0.09	0.09	0.09	0.11	0.1	0.1	0.08	0.13	0.17	0.09	0.44	0.1	0.08	0.09	0.09	0.06	0.09	0.09	0.1	0.08	0.09	0.07	0.08	0.16	0.14	0.12	0.12	0.09	0.14	0.19	0.12	0.09	0.1	0.09	0.07
cg11200929	CRABP1	Pure Island	Within	0.07	0.14	0.12	0.04	0.06	0.04	0.05	0.04	0.05	0.06	0.07	0.84	0.93	0.44	0.26	0.48	0.3	0.46	0.46	0.19	0.91	0.94	0.41	0.03	0.42	0.71	0.96	0.33	0.06	0.11	0.06	0.15	0.07	0.11	0.96	0.31	0.93	0.04	0.94	0.25	0.96	0.08	0.9	0.88	0.87	0.49
cg11248413	NEUROG1	Pure Island	Within	0.04	0.06	0.04	0.04	0.04	0.03	0.19	0.06	0.06	0.03	0.06	0.3	0.99	0.53	0.25	0.92	0.67	0.11	0.94	0.7	0.96	0.98	0.24	0.03	0.6	0.97	0.02	0.59	0.4	0.08	0.04	0.61	0.04	0.15	0.94	0.91	0.91	0.98	0.99	0.89	0.99	0.04	0.96	0.94	0.88	0.56
cg11251858	ESR1	Associated Island	Within	0.16	0.24	0.18	0.06	0.03	0.03	0.07	0.04	0.04	0.03	0.11	0.88	0.91	0.31	0.66	0.05	0.12	0.05	0.87	0.74	0.67	0.91	0.36	0.28	0.67	0.03	0.04	0.3	0.02	0.18	0.05	0.53	0.91	0.2	0.87	0.12	0.86	0.9	0.9	0.88	0.92	0.15	0.76	0.63	0.39	0.18
cg11255163	CDH1	Pure Island	Within	0.06	0.05	0.05	0.03	0.03	0.03	0.02	0.03	0.02	0.03	0.03	0.89	0.96	0.02	0.24	0.05	0.05	0.03	0.17	0.08	0.03	0.91	0.05	0.03	0.03	0.02	0.03	0.03	0.02	0.32	0.02	0.78	0.02	0.05	0.04	0.03	0.04	0.03	0.03	0.04	0.96	0.03	0.03	0.06	0.07	0.03
cg11260422	FOXA1	Pure Island	Within	0.05	0.06	0.05	0.03	0.07	0.06	0.04	0.07	0.18	0.02	0.03	0.94	0.04	0.04	0.08	0.05	0.07	0.04	0.36	0.13	0.06	0.07	0.04	0.03	0.02	0.03	0.03	0.09	0.03	0.03	0.03	0.03	0.03	0.03	0.03	0.04	0.05	0.06	0.04	0.06	0.3	0.03	0.03	0.09	0.1	0.03
cg11262815	CACNA1G	Pure Island	Within	0.06	0.06	0.05	0.12	0.04	0.06	0.08	0.05	0.04	0.02	0.03	0.04	0.05	0.18	0.19	0.44	0.1	0.31	0.07	0.07	0.89	0.88	0.14	0.03	0.03	0.07	0.03	0.02	0.04	0.02	0.16	0.04	0.02	0.03	0.63	0.04	0.25	0.29	0.79	0.52	0.08	0.03	0.27	0.81	0.33	0.05
cg11269533	FEV	Pure Island	Within	0.07	0.08	0.06	0.04	0.16	0.11	0.16	0.17	0.11	0.09	0.12	0.07	0.13	0.32	0.18	0.54	0.48	0.13	0.61	0.26	0.54	0.85	0.35	0.04	0.13	0.55	0.58	0.32	0.14	0.23	0.08	0.49	0.03	0.04	0.12	0.09	0.31	0.61	0.54	0.56	0.93	0.1	0.16	0.85	0.51	0.42
cg11298412	AC110760.3-2	Pure Island	Within	0.07	0.07	0.04	0.03	0.04	0.04	0.04	0.04	0.03	0.02	0.04	0.35	0.04	0.06	0.49	0.21	0.11	0.37	0.1	0.08	0.1	0.56	0.28	0.04	0.03	0.83	0.03	0.05	0.03	0.05	0.04	0.06	0.02	0.03	0.05	0.02	0.11	0.32	0.03	0.08	0.03	0.04	0.04	0.15	0.06	0.3
cg11308840	TMEM215	Pure Island	Within	0.06	0.08	0.06	0.07	0.07	0.07	0.07	0.07	0.06	0.04	0.05	0.14	0.91	0.3	0.22	0.65	0.11	0.07	0.81	0.76	0.84	0.87	0.11	0.27	0.13	0.8	0.09	0.24	0.86	0.05	0.16	0.11	0.08	0.36	0.75	0.44	0.53	0.87	0.84	0.87	0.9	0.19	0.35	0.82	0.68	0.39
cg11312566	SLC2A8	Pure Island	Within	0.07	0.07	0.04	0.03	0.03	0.03	0.03	0.03	0.03	0.02	0.03	0.04	0.95	0.03	0.12	0.05	0.08	0.05	0.07	0.06	0.1	0.26	0.03	0.02	0.03	0.03	0.04	0.02	0.02	0.02	0.03	0.03	0.02	0.02	0.03	0.03	0.05	0.04	0.03	0.03	0.53	0.04	0.03	0.08	0.05	0.03
cg11316784	NSD1	Pure Island	Within	0.08	0.08	0.05	0.02	0.04	0.03	0.03	0.04	0.03	0.01	0.06	0.05	0.17	0.03	0.72	0.05	0.08	0.05	0.08	0.08	0.09	0.06	0.12	0.05	0.03	0.06	0.02	0.03	0.07	0.03	0.03	0.03	0.3	0.06	0.03	0.03	0.04	0.94	0.07	0.05	0.03	0.03	0.04	0.08	0.09	0.04
cg11354906	SFRP2	Pure Island	Within	0.08	0.1	0.08	0.2	0.06	0.08	0.07	0.06	0.06	0.11	0.08	0.89	0.46	0.61	0.85	0.83	0.74	0.57	0.79	0.83	0.86	0.88	0.65	0.07	0.15	0.87	0.53	0.57	0.07	0.85	0.08	0.86	0.82	0.11	0.74	0.9	0.78	0.88	0.83	0.84	0.89	0.12	0.85	0.77	0.81	0.85
cg11377136	PKDREJ	Pure Island	Within	0.15	0.14	0.1	0.06	0.05	0.06	0.07	0.07	0.06	0.05	0.25	0.95	0.96	0.68	0.92	0.91	0.29	0.87	0.89	0.87	0.88	0.91	0.63	0.98	0.97	0.96	0.98	0.97	0.58	0.92	0.23	0.97	0.98	0.97	0.97	0.98	0.92	0.98	0.97	0.92	0.97	0.98	0.85	0.86	0.94	0.94
cg11378840	HHEX	Pure Island	Within	0.1	0.09	0.03	0.02	0.03	0.02	0.02	0.03	0.02	0.01	0.03	0.98	0.02	0.02	0.3	0.04	0.07	0.05	0.06	0.12	0.89	0.91	0.01	0.01	0.02	0.02	0.03	0.01	0.01	0.01	0.02	0.01	0.02	0.02	0.57	0.42	0.78	0.24	0.27	0.01	0.01	0.02	0.01	0.03	0.04	0.02
cg11389172	SLC18A3	Pure Island	Within	0.08	0.09	0.07	0.06	0.03	0.03	0.03	0.03	0.03	0.02	0.03	0.07	0.95	0.29	0.17	0.86	0.38	0.23	0.91	0.94	0.81	0.93	0.37	0.01	0.57	0.88	0.03	0.16	0.02	0.53	0.08	0.74	0.01	0.02	0.98	0.45	0.93	0.95	0.98	0.94	0.97	0.29	0.9	0.92	0.8	0.26
cg11393453	FAM59A	Pure Island	Within	0.05	0.06	0.04	0.02	0.03	0.03	0.03	0.03	0.03	0.01	0.02	0.04	0.03	0.03	0.06	0.04	0.07	0.04	0.12	0.05	0.06	0.04	0.02	0.02	0.03	0.03	0.03	0.03	0.02	0.02	0.02	0.02	0.01	0.02	0.03	0.02	0.06	0.03	0.03	0.04	0.03	0.03	0.03	0.04	0.08	0.02
cg11397854	IQSEC1	Pure Island	Within	0.1	0.08	0.06	0.04	0.04	0.03	0.03	0.03	0.03	0.03	0.03	0.05	0.09	0.03	0.7	0.05	0.09	0.05	0.11	0.71	0.08	0.05	0.03	0.8	0.03	0.03	0.04	0.04	0.84	0.02	0.03	0.03	0.05	0.03	0.35	0.03	0.07	0.03	0.31	0.17	0.05	0.04	0.03	0.08	0.05	0.03
cg11398680	PTK2	Pure Island	Within	0.07	0.08	0.07	0.06	0.07	0.06	0.06	0.08	0.05	0.07	0.04	0.07	0.07	0.05	0.09	0.07	0.09	0.06	0.13	0.1	0.08	0.07	0.04	0.04	0.03	0.04	0.03	0.04	0.04	0.03	0.04	0.05	0.06	0.03	0.04	0.05	0.07	0.06	0.05	0.06	0.07	0.06	0.04	0.08	0.12	0.04
cg11400333	TMEM151A	Pure Island	Within	0.08	0.07	0.06	0.03	0.04	0.05	0.05	0.05	0.04	0.02	0.05	0.05	0.14	0.08	0.19	0.43	0.15	0.05	0.09	0.07	0.68	0.69	0.15	0.04	0.04	0.36	0.05	0.06	0.05	0.03	0.04	0.06	0.03	0.05	0.14	0.05	0.09	0.31	0.36	0.12	0.06	0.05	0.05	0.12	0.1	0.06
cg11422541	ADCY6	Pure Island	Within	0.08	0.1	0.06	0.06	0.06	0.06	0.06	0.06	0.06	0.07	0.05	0.06	0.05	0.04	0.08	0.05	0.12	0.05	0.11	0.08	0.1	0.08	0.02	0.02	0.02	0.03	0.04	0.02	0.03	0.03	0.04	0.03	0.05	0.02	0.04	0.04	0.07	0.03	0.05	0.04	0.05	0.05	0.04	0.06	0.06	0.04
cg11426590	TRIM62	Pure Island	Within	0.1	0.07	0.04	0.03	0.04	0.03	0.03	0.04	0.03	0.02	0.03	0.04	0.05	0.03	0.07	0.05	0.07	0.05	0.1	0.07	0.07	0.06	0.03	0.02	0.02	0.03	0.03	0.03	0.03	0.02	0.03	0.03	0.03	0.02	0.02	0.04	0.06	0.05	0.02	0.1	0.05	0.03	0.03	0.04	0.06	0.03
cg11428724	PAX7	Pure Island	Within	0.08	0.08	0.07	0.22	0.08	0.07	0.08	0.07	0.1	0.04	0.21	0.04	0.98	0.94	0.15	0.97	0.12	0.97	0.97	0.96	0.96	0.95	0.27	0.99	0.42	0.98	0.03	0.97	0.57	0.02	0.19	0.97	0.68	0.93	0.99	0.98	0.93	0.98	0.98	0.94	0.99	0.14	0.99	0.95	0.96	0.97
cg11438428	PTF1A	Pure Island	Within	0.06	0.05	0.05	0.03	0.07	0.07	0.06	0.18	0.06	0.06	0.07	0.05	0.98	0.35	0.06	0.94	0.65	0.52	0.85	0.93	0.91	0.94	0.25	0.47	0.32	0.95	0.03	0.33	0.02	0.28	0.53	0.63	0.28	0.16	0.88	0.58	0.74	0.97	0.96	0.98	0.98	0.09	0.8	0.47	0.54	0.58
cg11460029	EFNB3	Pure Island	Within	0.07	0.07	0.07	0.04	0.07	0.06	0.07	0.06	0.06	0.03	0.06	0.07	0.09	0.06	0.12	0.06	0.21	0.09	0.1	0.13	0.84	0.89	0.28	0.04	0.28	0.08	0.23	0.22	0.12	0.08	0.05	0.57	0.04	0.08	0.92	0.93	0.88	0.08	0.96	0.95	0.55	0.21	0.2	0.9	0.79	0.47
cg11465971	GSH2	Pure Island	Within	0.06	0.04	0.05	0.03	0.11	0.09	0.09	0.1	0.07	0.04	0.05	0.39	0.11	0.2	0.47	0.86	0.05	0.13	0.42	0.69	0.9	0.92	0.25	0.02	0.49	0.86	0.23	0.14	0.02	0.02	0.03	0.05	0.45	0.03	0.93	0.59	0.9	0.54	0.92	0.04	0.94	0.04	0.89	0.86	0.5	0.42
cg11475332	SDC1	Pure Island	Within	0.03	0.05	0.02	0.02	0.03	0.02	0.02	0.03	0.02	0.02	0.02	0.02	0.02	0.02	0.06	0.03	0.03	0.03	0.03	0.04	0.03	0.03	0.02	0.02	0.01	0.02	0.01	0.01	0.01	0.01	0.01	0.02	0.01	0.01	0.01	0.01	0.02	0.02	0.02	0.02	0.03	0.02	0.02	0.03	0.03	0.02
cg11476211	PRKCE	Pure Island	Within	0.05	0.03	0.02	0.03	0.04	0.03	0.03	0.03	0.02	0.02	0.02	0.02	0.63	0.03	0.8	0.04	0.04	0.02	0.31	0.08	0.9	0.13	0.01	0.2	0.73	0.04	0.43	0.05	0.01	0.21	0.05	0.33	0.87	0.02	0.01	0.75	0.05	0.79	0.96	0.03	0.42	0.03	0.02	0.69	0.05	0.03
cg11480873	RAB7L1	Pure Island	Within	0.08	0.05	0.03	0.07	0.04	0.05	0.04	0.04	0.04	0.11	0.04	0.04	0.04	0.03	0.06	0.06	0.08	0.03	0.11	0.06	0.07	0.05	0.04	0.03	0.03	0.03	0.03	0.03	0.02	0.03	0.03	0.03	0.04	0.03	0.03	0.05	0.1	0.03	0.06	0.04	0.03	0.04	0.03	0.16	0.1	0.04
cg11490446	PSEN1	Pure Island	Within	0.07	0.06	0.04	0.09	0.05	0.03	0.03	0.04	0.03	0.05	0.04	0.82	0.07	0.03	0.19	0.05	0.05	0.03	0.07	0.04	0.03	0.2	0.02	0.03	0.04	0.05	0.13	0.01	0.02	0.05	0.02	0.04	0.04	0.03	0.02	0.04	0.04	0.03	0.04	0.04	0.29	0.04	0.03	0.38	0.05	0.58
cg11507178	BCL9L	Pure Island	Within	0.09	0.09	0.09	0.06	0.16	0.2	0.18	0.19	0.19	0.07	0.11	0.09	0.88	0.15	0.09	0.15	0.17	0.15	0.11	0.09	0.08	0.13	0.09	0.75	0.1	0.16	0.09	0.09	0.61	0.09	0.16	0.1	0.05	0.6	0.11	0.33	0.19	0.1	0.08	0.13	0.12	0.1	0.11	0.21	0.24	0.18
cg11510839	OCA2	Pure Island	Within	0.07	0.08	0.08	0.18	0.04	0.06	0.07	0.06	0.05	0.11	0.03	0.2	0.09	0.05	0.19	0.42	0.19	0.07	0.54	0.11	0.72	0.92	0.03	0.03	0.02	0.78	0.04	0.05	0.06	0.03	0.03	0.17	0.12	0.03	0.37	0.19	0.81	0.03	0.41	0.63	0.96	0.04	0.73	0.42	0.12	0.07
cg11538128	ZNF354C	Pure Island	Within	0.2	0.06	0.03	0.06	0.03	0.03	0.03	0.03	0.03	0.05	0.19	0.05	0.89	0.29	0.3	0.26	0.05	0.04	0.83	0.75	0.76	0.84	0.02	0.02	0.3	0.26	0.03	0.06	0.03	0.14	0.07	0.43	0.49	0.87	0.91	0.91	0.61	0.87	0.81	0.34	0.88	0.3	0.66	0.79	0.06	0.3
cg11550426	SDCBP	Pure Island	Within	0.05	0.1	0.03	0.01	0.04	0.04	0.04	0.04	0.03	0.01	0.03	0.03	0.03	0.04	0.08	0.05	0.08	0.04	0.06	0.06	0.08	0.06	0.01	0.01	0.01	0.03	0.01	0.01	0.01	0.01	0.02	0.01	0.01	0.02	0.01	0.02	0.04	0.01	0.02	0.02	0.02	0.03	0.02	0.04	0.05	0.02
cg11582100	GAD1	Pure Island	Within	0.1	0.08	0.07	0.17	0.08	0.09	0.07	0.08	0.11	0.15	0.07	0.08	0.04	0.06	0.07	0.07	0.07	0.07	0.05	0.07	0.08	0.32	0.04	0.04	0.06	0.05	0.05	0.05	0.03	0.03	0.04	0.04	0.05	0.04	0.06	0.08	0.04	0.08	0.05	0.05	0.06	0.08	0.1	0.08	0.09	0.04
cg11611600	ADAMTSL3	Pure Island	Within	0.08	0.06	0.04	0.2	0.06	0.04	0.05	0.07	0.05	0.03	0.04	0.35	0.94	0.58	0.64	0.88	0.64	0.8	0.72	NA	0.89	0.9	0.05	0.04	0.38	0.84	0.05	0.29	0.19	0.07	0.05	0.46	0.16	0.1	0.93	0.62	0.82	0.82	0.88	0.94	0.92	0.41	0.91	0.74	0.5	0.06
cg11612291	ZNF35	Pure Island	Within	0.06	0.05	0.04	0.09	0.05	0.05	0.06	0.07	0.07	0.07	0.03	0.05	0.06	0.04	0.06	0.05	0.07	0.06	0.08	0.09	0.08	0.06	0.04	0.03	0.03	0.04	0.76	0.03	0.04	0.03	0.04	0.02	0.07	0.04	0.05	0.05	0.12	0.04	0.03	0.05	0.04	0.07	0.05	0.18	0.07	0.05
cg11620873	CD9	Pure Island	Within	0.07	0.09	0.06	0.04	0.05	0.03	0.04	0.04	0.04	0.04	0.04	0.05	0.32	0.05	0.39	0.07	0.11	0.07	0.11	0.09	0.07	0.08	0.04	0.3	0.05	0.04	0.05	0.04	0.04	0.05	0.04	0.38	0.03	0.05	0.04	0.05	0.06	0.05	0.04	0.06	0.06	0.04	0.04	0.1	0.05	0.04
cg11625946	LRIG3	Pure Island	Within	0.04	0.05	0.03	0.02	0.05	0.05	0.08	0.06	0.06	0.03	0.03	0.03	0.97	0.04	0.05	0.05	0.05	0.05	0.44	0.2	0.05	0.06	0.42	0.03	0.03	0.03	0.02	0.03	0.02	0.03	0.03	0.03	0.02	0.03	0.03	0.03	0.06	0.03	0.03	0.03	0.2	0.03	0.03	0.07	0.06	0.03
cg11638200	PRKCQ	Pure Island	Within	0.06	0.1	0.07	0.08	0.06	0.06	0.06	0.05	0.05	0.04	0.03	0.05	0.04	0.05	0.15	0.88	0.06	0.61	0.07	0.32	0.11	0.62	0.2	0.31	0.03	0.95	0.05	0.05	0.04	0.03	0.03	0.04	0.27	0.03	0.05	0.05	0.13	0.13	0.61	0.96	0.28	0.06	0.91	0.1	0.16	0.04
cg11651717	ABCA5	Pure Island	Within	0.07	0.07	0.04	0.02	0.02	0.02	0.02	0.03	0.02	0.02	0.02	0.03	0.03	0.02	0.1	0.04	0.09	0.05	0.05	0.06	0.05	0.05	0.02	0.02	0.02	0.34	0.02	0.01	0.01	0.02	0.02	0.02	0.02	0.02	0.02	0.02	0.03	0.02	0.02	0.02	0.21	0.03	0.03	0.08	0.05	0.03
cg11654620	TYMP	Pure Island	Within	0.12	0.07	0.05	0.03	0.02	0.03	0.04	0.03	0.03	0.02	0.03	0.94	0.06	0.25	0.37	0.46	0.08	0.04	0.24	0.07	0.3	0.04	0.02	0.06	0.03	0.39	0.04	0.03	0.21	0.02	0.02	0.03	0.95	0.05	0.02	0.03	0.05	0.96	0.97	0.04	0.97	0.03	0.03	0.04	0.12	0.02
cg11657808	RYR2	Pure Island	Within	0.08	0.07	0.06	0.07	0.05	0.05	0.06	0.07	0.06	0.03	0.04	0.11	0.96	0.41	0.12	0.85	0.91	0.17	0.92	0.9	0.94	0.96	0.31	0.91	0.04	0.94	0.07	0.15	0.94	0.05	0.84	0.44	0.23	0.98	0.96	0.93	0.9	0.96	0.95	0.96	0.97	0.62	0.95	0.8	0.69	0.79
cg11665588	SESN3	Pure Island	Within	0.07	0.06	0.04	0.02	0.08	0.08	0.08	0.08	0.07	0.03	0.05	0.05	0.04	0.06	0.07	0.07	0.12	0.76	0.1	0.06	0.08	0.66	0.03	0.02	0.03	0.05	0.03	0.06	0.03	0.03	0.05	0.04	0.03	0.03	0.04	0.04	0.1	0.06	0.04	0.59	0.97	0.04	0.14	0.76	0.12	0.11
cg11668923	ADAM12	Pure Island	Within	0.09	0.09	0.05	0.1	0.05	0.05	0.05	0.05	0.05	0.05	0.04	0.23	0.96	0.04	0.93	0.74	0.4	0.08	0.8	0.71	0.9	0.91	0.91	0.18	0.26	0.96	0.09	0.3	0.04	0.04	0.04	0.2	0.86	0.18	0.96	0.95	0.91	0.92	0.94	0.96	0.97	0.96	0.96	0.81	0.72	0.03
cg11673969	EPHB4	Pure Island	Within	0.07	0.08	0.05	0.04	0.06	0.06	0.06	0.06	0.07	0.03	0.04	0.05	0.05	0.04	0.08	0.06	0.07	0.08	0.06	0.07	0.05	0.07	0.03	0.03	0.03	0.04	0.04	0.03	0.03	0.03	0.04	0.04	0.03	0.03	0.04	0.04	0.08	0.04	0.04	0.04	0.03	0.04	0.04	0.12	0.07	0.05
cg11695266	DNAJB6	Pure Island	Within	0.07	0.09	0.06	0.02	0.03	0.03	0.03	0.04	0.03	0.03	0.02	0.08	0.04	0.31	0.52	0.05	0.09	0.05	0.22	0.1	0.91	0.93	0.35	0.14	0.55	0.52	0.32	0.06	0.21	0.75	0.03	0.96	0.02	0.31	0.49	0.96	0.88	0.02	0.92	0.34	0.96	0.04	0.94	0.83	0.08	0.04
cg11697652	ATF7IP	Pure Island	Within	0.08	0.12	0.05	0.14	0.06	0.1	0.08	0.08	0.11	0.2	0.08	0.58	0.1	0.06	0.08	0.1	0.11	0.13	0.09	0.08	0.11	0.09	0.04	0.05	0.03	0.06	0.04	0.03	0.04	0.05	0.03	0.04	0.1	0.03	0.05	0.03	0.14	0.04	0.09	0.04	0.04	0.07	0.08	0.2	0.11	0.09
cg11715903	PLEKHC1	Pure Island	Within	0.03	0.04	0.04	0.05	0.03	0.03	0.02	0.03	0.02	0.02	0.02	0.03	0.03	0.03	0.05	0.03	0.05	0.02	0.09	0.05	0.9	0.89	0.02	0.01	0.01	0.02	0.03	0.01	0.01	0.01	0.02	0.02	0.01	0.02	0.97	0.44	0.95	0.03	0.96	0.49	0.03	0.04	0.69	0.1	0.03	0.02
cg11732619	SLIT3	Pure Island	Within	0.11	0.08	0.07	0.05	0.03	0.04	0.03	0.03	0.03	0.03	0.02	0.21	0.97	0.03	0.29	0.59	0.73	0.37	0.94	0.92	0.9	0.94	0.25	0.38	0.03	0.56	0.07	0.44	0.02	0.02	0.12	0.03	0.54	0.96	0.97	0.94	0.95	0.98	0.97	0.97	0.97	0.58	0.79	0.85	0.81	0.37
cg11754676	ZNF10	Pure Island	Within	0.04	0.05	0.02	0.01	0.03	0.04	0.03	0.04	0.03	0.01	0.02	0.02	0.02	0.04	0.19	0.03	0.04	0.03	0.06	0.03	0.85	0.03	0.01	0.01	0.02	0.02	0.01	0.01	0.02	0.01	0.02	0.01	0.02	0.01	0.02	0.13	0.03	0.02	0.02	0.02	0.02	0.03	0.02	0.86	0.07	0.02
cg11806749	SUPT3H	Pure Island	Within	0.04	0.03	0.03	0.04	0.06	0.07	0.06	0.06	0.06	0.03	0.05	0.94	0.03	0.04	0.04	0.05	0.04	0.06	0.08	0.03	0.04	0.03	0.03	0.03	0.02	0.04	0.04	0.03	0.02	0.02	0.04	0.03	0.02	0.02	0.03	0.02	0.04	0.02	0.02	0.03	0.03	0.05	0.03	0.14	0.08	0.05
cg11815363	KCNK1	Pure Island	Within	0.01	0.02	0.03	0.12	0.05	0.04	0.05	0.04	0.03	0.02	0.02	0.02	0.95	0.02	0.03	0.03	0.04	0.49	0.05	0.19	0.03	0.02	0.3	0.01	0.01	0.02	0.01	0.09	0.01	0.01	0.02	0.01	0.12	0.01	0.01	0.01	0.03	0.9	0.02	0.09	0.98	0.02	0.02	0.04	0.07	0.03
cg11832722	DSC3	Pure Island	Within	0.07	0.09	0.07	0.07	0.05	0.06	0.03	0.05	0.05	0.07	0.04	0.92	0.95	0.04	0.92	0.87	0.11	0.92	0.5	0.3	0.89	0.92	0.92	0.34	0.05	0.93	0.06	0.37	0.05	0.08	0.1	0.95	0.73	0.69	0.96	0.4	0.28	0.38	0.94	0.91	0.96	0.09	0.06	0.19	0.87	0.86
cg11846236	COL7A1	Pure Island	Within	0.22	0.08	0.1	0.03	0.04	0.03	0.08	0.05	0.04	0.03	0.03	0.95	0.47	0.19	0.95	0.89	0.89	0.94	0.92	0.09	0.94	0.95	0.97	0.08	0.02	0.96	0.98	0.27	0.86	0.04	0.05	0.02	0.97	0.77	0.95	0.97	0.9	0.95	0.96	0.92	0.96	0.06	0.38	0.84	0.11	0.03
cg11857445	AATF	Pure Island	Within	0.03	0.04	0.04	0.05	0.05	0.05	0.09	0.06	0.05	0.03	0.15	0.03	0.02	0.04	0.07	0.05	0.05	0.04	0.05	0.19	0.34	0.95	0.02	0.02	0.02	0.03	0.02	0.02	0.01	0.02	0.04	0.02	0.01	0.05	0.02	0.02	0.05	0.03	0.03	0.05	0.02	0.03	0.03	0.62	0.09	0.04
cg11896271	PANX2	Pure Island	Within	0.18	0.05	0.04	0.03	0.06	0.06	0.06	0.08	0.06	0.02	0.06	0.56	0.77	0.51	0.54	0.57	0.89	0.57	0.94	0.38	0.88	0.96	0.48	0.02	0.04	0.46	0.05	0.19	0.04	0.02	0.05	0.02	0.02	0.07	0.66	0.58	0.73	0.98	0.97	0.3	0.06	0.05	0.05	0.79	0.17	0.06
cg11928635	ZNF318	Pure Island	Within	0.09	0.07	0.09	0.08	0.05	0.04	0.04	0.04	0.03	0.07	0.09	0.06	0.12	0.07	0.13	0.16	0.26	0.11	0.09	0.08	0.12	NA	0.02	0.04	0.04	0.07	0.05	0.03	0.03	0.05	0.03	0.05	0.11	0.05	0.06	0.11	0.27	0.17	0.83	0.14	0.15	0.08	0.07	0.08	0.2	0.04
cg11930592	MSX1	Pure Island	Within	0.08	0.08	0.06	0.03	0.02	0.03	0.02	0.03	0.03	0.02	0.02	0.04	0.04	0.03	0.18	0.26	0.72	0.05	0.1	0.11	0.08	0.07	0.3	0.02	0.02	0.27	0.03	0.02	0.02	0.02	0.04	0.04	0.02	0.02	0.03	0.03	0.52	0.03	0.03	0.09	0.03	0.03	0.04	0.09	0.52	0.02
cg11934695	ADRA1D	Pure Island	Within	0.09	0.06	0.05	0.03	0.05	0.04	0.07	0.05	0.05	0.02	0.04	0.94	0.92	0.24	0.63	0.89	0.35	0.85	0.13	0.08	0.89	0.92	0.04	0.47	0.02	0.95	0.05	0.04	0.03	0.09	0.34	0.24	0.89	0.14	0.97	0.96	0.9	0.24	0.94	0.96	0.96	0.04	0.27	0.92	0.93	0.06
cg11947493	TNFRSF10D	Pure Island	Within	0.1	0.11	0.15	0.04	0.05	0.06	0.08	0.07	0.05	0.08	0.04	0.94	0.06	0.05	0.95	0.91	0.41	0.94	0.1	0.1	0.18	0.1	0.04	0.33	0.03	0.96	0.03	0.03	0.96	0.14	0.05	0.03	0.97	0.36	0.03	0.07	0.06	0.05	0.04	0.1	0.05	0.06	0.05	0.05	0.06	0.07
cg11948328	HSD17B12	Pure Island	Within	0.18	0.21	0.18	0.07	0.07	0.06	0.07	0.08	0.06	0.1	0.07	0.3	0.13	0.11	0.23	0.14	0.28	0.11	0.17	0.21	0.25	0.28	0.05	0.11	0.06	0.23	0.16	0.05	0.06	0.04	0.07	0.05	0.04	0.06	0.07	0.08	0.14	0.08	0.05	0.09	0.09	0.09	0.06	0.08	0.09	0.06
cg11965370	HNT	Pure Island	Within	0.09	0.1	0.12	0.07	0.04	0.04	0.05	0.04	0.04	0.02	0.04	0.61	0.96	0.6	0.07	0.69	0.35	0.05	0.92	0.74	0.73	0.85	0.56	0.16	0.55	0.44	0.19	0.64	0.51	0.52	0.52	0.57	0.09	0.37	0.56	0.52	0.61	0.85	0.64	0.96	0.83	0.59	0.24	0.81	0.66	0.6
cg11979959	SULF2	Pure Island	Within	0.09	0.1	0.05	0.09	0.05	0.06	0.05	0.05	0.05	0.05	0.1	0.93	0.24	0.09	0.12	0.25	0.06	0.05	0.12	0.06	0.1	0.95	0.09	0.02	0.02	0.13	0.03	0.05	0.02	0.02	0.22	0.03	0.05	0.03	0.09	0.07	0.07	0.09	0.04	0.07	0.3	0.2	0.23	0.16	0.71	0.44
cg11981631	ABCC8	Pure Island	Within	0.07	0.07	0.05	0.05	0.06	0.05	0.04	0.08	0.04	0.06	0.05	0.06	0.69	0.18	0.11	0.33	0.54	0.14	0.67	0.16	0.92	0.92	0.5	0.03	0.05	0.23	0.04	0.33	0.06	0.08	0.47	0.6	0.02	0.05	0.94	0.75	0.96	0.7	0.97	0.61	0.54	0.06	0.22	0.93	0.53	0.22
cg11991859	NPAS3	Pure Island	Within	0.13	0.12	0.06	0.08	0.03	0.04	0.03	0.03	0.03	0.04	0.08	0.06	0.06	0.04	0.14	0.06	0.14	0.08	0.14	0.16	0.78	0.62	0.02	0.02	0.03	0.03	0.06	0.03	0.02	0.02	0.03	0.03	0.03	0.03	0.5	0.05	0.26	0.08	0.18	0.07	0.36	0.04	0.12	0.67	0.1	0.04
cg11993754	ERBB2	Associated Island	Within	0.08	0.07	0.04	0.03	0.04	0.05	0.04	0.03	0.04	0.02	0.02	0.04	0.96	0.03	0.11	0.04	0.06	0.05	0.13	0.08	0.08	0.08	0.03	0.94	0.04	0.03	0.03	0.03	0.55	0.04	0.06	0.11	0.98	0.1	0.03	0.02	0.05	0.04	0.04	0.05	0.04	0.05	0.03	0.09	0.05	0.03
cg12005098	SLC16A12	Pure Island	Within	0.04	0.13	0.12	0.06	0.03	0.03	0.02	0.03	0.03	0.03	0.03	0.97	0.36	0.88	0.62	0.95	0.44	0.95	0.95	0.93	0.94	0.95	0.46	0.02	0.49	0.98	0.04	0.41	0.02	0.04	0.23	0.63	0.07	0.06	0.98	0.98	0.94	0.84	0.98	0.98	0.98	0.03	0.99	0.85	0.66	0.61
cg12011267	PPP1R13B	Pure Island	Within	0.08	0.11	0.1	0.08	0.13	0.15	0.1	0.1	0.06	0.04	0.08	0.74	0.53	0.29	0.8	0.11	0.18	0.04	0.48	0.14	0.31	0.66	0.13	0.37	0.37	0.03	0.04	0.31	0.12	0.27	0.03	0.85	0.04	0.15	0.05	0.35	0.09	0.25	0.5	0.5	0.51	0.07	0.03	0.5	0.07	0.07
cg12062995	RFC1	Pure Island	Within	0.12	0.07	0.09	NA	0.08	0.08	0.12	0.13	0.11	0.18	0.21	0.15	0.09	0.27	0.45	0.14	0.18	0.1	0.25	0.4	0.06	0.85	0.09	0.6	0.1	0.1	0.15	0.1	0.21	0.06	0.05	0.89	NA	0.24	0.08	0.66	0.13	0.18	0.6	0.96	0.61	0.16	0.27	0.56	0.2	0.06
cg12063359	KCNK15	Pure Island	Within	0.07	0.07	0.05	0.09	0.02	0.02	0.02	0.03	0.02	0.01	0.05	0.94	0.1	0.17	0.17	0.06	0.11	0.03	0.21	0.08	0.91	0.69	0.18	0.02	0.52	0.02	0.02	0.04	0.02	0.14	0.04	0.52	0.02	0.58	0.46	0.53	0.43	0.07	0.74	0.66	0.07	0.04	0.06	0.92	0.22	0.02
cg12066181	DNMT3A	Pure Island	Within	0.07	0.08	0.08	0.05	0.08	0.06	0.07	0.06	0.05	0.06	0.04	0.06	0.07	0.04	0.1	0.08	0.07	0.07	0.09	0.08	0.08	0.06	0.03	0.04	0.03	0.04	0.03	0.02	0.03	0.03	0.03	0.03	0.03	0.03	0.04	0.03	0.07	0.03	0.03	0.04	0.04	0.04	0.04	0.11	0.08	0.05
cg12078929	SERHL	Pure Island	Within	0.05	0.04	0.02	0.01	0.02	0.04	0.09	0.16	0.02	0.1	0.06	0.99	0.99	0.39	0.68	0.98	0.98	0.02	0.43	0.59	0.98	0.99	0.05	0.88	0.28	0.98	0.01	0.44	0.8	0.49	0.07	0.99	0.95	0.9	0.2	0.54	0.84	0.99	0.99	0.99	0.99	0.12	0.51	0.98	0.98	0.98
cg12087643	GFRA1	Pure Island	Within	0.05	0.06	0.05	0.09	0.07	0.08	0.07	0.07	0.07	0.07	0.12	0.81	0.83	0.39	0.73	0.05	0.73	0.06	0.75	0.78	0.76	0.8	0.24	0.03	0.05	0.03	0.03	0.32	0.04	0.06	0.11	0.47	0.52	0.71	0.83	0.82	0.76	0.82	0.84	0.83	0.83	0.11	0.62	0.7	0.77	0.4
cg12099051	SAMHD1	Pure Island	Within	0.07	0.06	0.12	0.07	0.07	0.07	0.05	0.06	0.07	0.19	0.05	0.06	0.4	0.07	0.06	0.14	0.17	0.06	0.08	0.09	0.12	0.07	0.05	0.03	0.04	0.2	0.03	0.04	0.04	0.03	0.04	0.05	0.09	0.03	0.05	0.34	0.07	0.06	0.04	0.05	0.07	0.06	0.05	0.09	0.06	0.05
cg12106945	COL13A1	Pure Island	Within	0.11	0.1	0.04	0.04	0.03	0.03	0.03	0.03	0.02	0.06	0.03	0.04	0.1	0.03	0.12	0.07	0.08	0.07	0.11	0.13	0.41	0.22	0.02	0.03	0.02	0.03	0.03	0.02	0.04	0.02	0.03	0.02	0.03	0.03	0.02	0.03	0.09	0.26	0.03	0.03	0.02	0.03	0.02	0.06	0.04	0.03
cg12109455	DPYSL4	Pure Island	Within	0.05	0.07	0.06	0.04	0.05	0.06	0.06	0.06	0.07	0.05	0.18	0.1	0.88	0.44	0.34	0.27	0.61	0.82	0.82	0.79	0.93	0.93	0.29	0.04	0.04	0.55	0.12	0.4	0.12	0.83	0.05	0.59	0.13	0.81	0.96	0.89	0.89	0.89	0.93	0.92	0.93	0.05	0.63	0.16	0.63	0.26
cg12128839	HOXA5	Pure Island	Within	0.06	0.09	0.05	0.21	0.07	0.1	0.06	0.08	0.07	0.15	0.05	0.03	0.04	0.04	0.83	0.06	0.07	0.61	0.15	0.08	0.29	0.05	0.06	0.83	0.14	0.03	0.25	0.05	0.86	0.82	0.15	0.9	0.34	0.86	0.15	0.9	0.41	0.42	0.32	0.88	0.87	0.19	0.86	0.63	0.46	0.04
cg12148919	PTPRK	Pure Island	Within	0.05	0.07	0.05	0.03	0.05	0.06	0.05	0.04	0.05	0.02	0.04	0.05	0.05	0.05	0.06	0.07	0.08	0.06	0.16	0.07	0.04	0.07	0.04	0.04	0.05	0.04	0.04	0.04	0.04	0.04	0.04	0.04	0.03	0.05	0.04	0.04	0.07	0.05	0.04	0.04	0.36	0.05	0.04	0.09	0.07	0.05
cg12154803	CCDC34	Pure Island	Within	0.19	0.21	0.09	0.04	0.04	0.05	0.03	0.04	0.04	0.04	0.04	0.07	0.06	0.06	0.21	0.1	0.22	0.09	0.14	0.18	0.25	0.18	0.02	0.03	0.04	0.04	0.04	0.03	0.03	0.03	0.04	0.04	0.03	0.03	0.05	0.05	0.13	0.05	0.05	0.14	0.07	0.05	0.05	0.14	0.05	0.05
cg12163490	CDH11	Pure Island	Within	0.06	0.06	0.04	0.02	0.03	0.03	0.03	0.03	0.07	0.01	0.06	0.7	0.96	0.15	0.14	0.38	0.58	0.41	0.6	0.42	0.88	0.89	0.4	0.2	0.18	0.94	0.02	0.51	0.02	0.55	0.17	0.57	0.07	0.04	0.97	0.97	0.95	0.59	0.97	0.96	0.98	0.05	0.84	0.92	0.05	0.71
cg12164282	PXDN	Pure Island	Within	0.05	0.06	0.05	0.02	0.06	0.06	0.05	0.05	0.05	0.02	0.03	0.04	0.96	0.04	0.79	0.2	0.04	0.04	0.94	0.95	0.95	0.96	0.63	0.02	0.64	0.61	0.06	0.82	0.02	0.02	0.05	0.97	0.74	0.95	0.99	0.98	0.97	0.99	0.98	0.98	0.99	0.98	0.96	0.75	0.06	0.89
cg12177743	TTC12	Pure Island	Within	0.14	0.14	0.07	0.15	0.09	0.06	0.07	0.08	0.07	0.12	0.04	0.05	0.95	0.04	0.18	0.1	0.15	0.06	0.11	0.13	0.07	0.11	0.03	0.04	0.04	0.05	0.06	0.03	0.05	0.04	0.03	0.05	0.16	0.05	0.04	0.08	0.09	0.04	0.25	0.13	0.11	0.05	0.05	0.12	0.08	0.05
cg12187213	ADAMTS9	Pure Island	Within	0.06	0.07	0.04	0.03	0.04	0.03	0.03	0.04	0.03	0.03	0.03	0.04	0.86	0.04	0.06	0.06	0.06	0.04	0.07	0.05	0.18	0.04	0.03	0.03	0.03	0.04	0.04	0.03	0.03	0.03	0.03	0.02	0.02	0.03	0.04	0.03	0.05	0.03	0.05	0.03	0.05	0.04	0.03	0.07	0.04	0.03
cg12189880	RHOV	Pure Island	Within	0.05	0.06	0.04	0.02	0.03	0.04	0.04	0.04	0.03	0.02	0.05	0.19	0.57	0.03	0.28	0.05	0.06	0.04	0.05	0.06	0.06	0.04	0.02	0.02	0.02	0.03	0.03	0.03	0.03	0.02	0.03	0.03	0.06	0.03	0.02	0.03	0.04	0.03	0.02	0.04	0.05	0.04	0.02	0.06	0.13	0.03
cg12195695	ARMC7	Pure Island	Within	0.13	0.16	0.09	0.04	0.05	0.04	0.04	0.04	0.05	0.03	0.06	0.06	0.12	0.08	0.2	0.1	0.13	0.08	0.19	0.17	0.11	0.53	0.05	0.07	0.03	0.05	0.04	0.06	0.04	0.04	0.06	0.06	0.03	0.04	0.05	0.04	0.07	0.17	0.04	0.2	0.06	0.04	0.04	0.09	0.12	0.05
cg12205047	IGSF3	No/Distant Island	Within	0.12	0.12	0.07	0.04	0.03	0.05	0.05	0.05	0.04	0.04	0.03	0.07	0.35	0.05	0.19	0.05	0.1	0.09	0.18	0.16	0.09	0.16	0.03	0.03	0.03	0.04	0.03	0.03	0.03	0.04	0.04	0.03	0.06	0.03	0.08	0.04	0.1	0.06	0.05	0.06	0.06	0.06	0.03	0.09	0.1	0.04
cg12220493	NKX2-1	Pure Island	Within	0.04	0.04	0.03	0.04	0.06	0.07	0.08	0.05	0.07	0.02	0.08	0.45	0.63	0.38	0.18	0.26	0.28	0.6	0.7	0.06	0.9	0.83	0.09	0.17	0.14	0.41	0.02	0.18	0.03	0.08	0.05	0.15	0.01	0.2	0.89	0.69	0.57	0.06	0.94	0.47	0.93	0.04	0.54	0.63	0.06	0.07
cg12238343	RXFP3	Pure Island	Within	0.04	0.06	0.04	NA	0.03	0.04	0.04	0.06	0.03	0.11	0.07	0.39	0.3	0.41	0.38	0.79	0.61	0.2	0.79	0.67	0.35	NA	0.25	0.16	0.84	0.73	0.78	0.36	0.02	0.65	0.1	0.88	0.05	0.72	0.82	0.36	0.79	0.84	0.83	0.85	0.83	0.66	0.49	0.59	0.84	0.37
cg12249575	NKX2-1	Pure Island	Within	0.05	0.08	0.06	0.08	0.05	0.05	0.05	0.05	0.04	0.06	0.04	0.22	0.96	0.43	0.22	0.59	0.31	0.37	0.61	0.39	0.89	0.93	0.02	0.02	0.03	0.26	0.06	0.06	0.03	0.02	0.03	0.04	0.02	0.7	0.94	0.08	0.88	0.29	0.48	0.43	0.33	0.04	0.51	0.55	0.1	0.18
cg12251804	C10orf125	Pure Island	Within	0.07	0.09	0.09	0.2	0.03	0.04	0.03	0.04	0.03	0.02	0.13	0.05	0.04	0.33	0.1	0.61	0.11	0.82	0.46	0.52	0.96	0.98	0.03	0.03	0.07	0.44	0.04	0.03	0.16	0.38	0.04	0.44	0.56	0.09	0.06	0.05	0.06	0.04	0.96	0.12	0.09	0.05	0.05	0.05	0.65	0.03
cg12275348	SOCS2	Pure Island	Within	0.07	0.05	0.05	0.04	0.05	0.05	0.04	0.03	0.03	0.05	0.22	0.92	0.64	0.13	0.87	0.17	0.57	0.12	0.42	0.77	0.64	0.54	0.2	0.2	0.38	0.42	0.03	0.53	0.37	0.61	0.18	0.79	0.58	0.61	0.14	0.77	0.09	0.09	0.83	0.15	0.65	0.44	0.13	0.36	0.1	0.53
cg12277666	TDRD5	Pure Island	Within	0.12	0.11	0.07	0.02	0.03	0.04	0.03	0.03	0.03	0.02	0.15	0.55	0.97	0.13	0.56	0.05	0.06	0.04	0.85	0.56	0.93	0.95	0.57	0.04	0.05	0.03	0.03	0.44	0.53	0.26	0.05	0.95	0.99	0.04	0.05	0.79	0.18	0.95	0.96	0.16	0.89	0.04	0.17	0.87	0.5	0.19
cg12280407	KCTD12	Pure Island	Within	0.06	0.06	0.03	0.02	0.02	0.03	0.03	0.03	0.03	0.01	0.03	0.04	0.03	0.04	0.18	0.05	0.29	0.04	0.06	0.07	0.06	0.47	0.02	0.04	0.02	0.03	0.02	0.02	0.02	0.02	0.03	0.02	0.01	0.03	0.71	0.05	0.05	0.04	0.5	0.03	0.04	0.04	0.02	0.13	0.05	0.03
cg12292686	PAOX	Pure Island	Within	0.11	0.09	0.07	0.15	0.04	0.05	0.05	0.04	0.04	0.04	0.08	0.08	0.06	0.14	0.15	0.12	0.09	0.07	0.12	0.1	0.1	0.44	0.05	0.04	0.05	0.05	0.06	0.04	0.04	0.04	0.04	0.08	0.04	0.06	0.07	0.15	0.12	0.17	0.2	0.23	0.05	0.09	0.05	0.1	0.06	0.04
cg12297221	ART5	Pure Island	Within	0.05	0.07	0.04	0.03	0.03	0.04	0.03	0.04	0.02	0.02	0.02	0.26	0.04	0.08	0.2	0.05	0.07	0.05	0.07	0.07	0.45	0.56	0.03	0.03	0.02	0.03	0.02	0.02	0.02	0.02	0.03	0.03	0.03	0.02	0.04	0.02	0.08	0.03	0.46	0.15	0.43	0.03	0.02	0.07	0.33	0.03
cg12300353	KCTD8	Pure Island	Within	0.04	0.05	0.03	0.02	0.03	0.04	0.04	0.04	0.03	0.02	0.05	0.58	0.97	0.55	0.65	0.93	0.85	0.84	0.92	0.9	0.92	0.92	0.36	0.66	0.46	0.97	0.02	0.45	0.01	0.96	0.02	0.59	0.01	0.48	0.98	0.97	0.89	0.96	0.97	0.97	0.98	0.97	0.98	0.87	0.84	0.93
cg12331389	RBP4	Pure Island	Within	0.09	0.1	0.05	0.18	0.05	0.03	0.04	0.08	0.06	0.02	0.15	0.47	0.98	0.42	0.38	0.92	0.93	0.51	0.44	0.21	0.43	0.9	0.66	0.02	0.37	0.95	0.62	0.33	0.04	0.4	0.23	0.8	0.03	0.04	0.07	0.97	0.36	0.36	0.93	0.83	0.11	0.05	0.03	0.8	0.95	0.07
cg12370791	HOXB9	Pure Island	Within	0.06	0.2	0.17	0.04	0.06	0.04	0.05	0.06	0.04	0.04	0.01	0.03	0.77	0.03	0.05	0.11	0.11	0.03	0.11	0.05	0.04	0.04	0.14	0.02	0.02	0.03	0.02	0.01	0.02	0.02	0.02	0.02	0.01	0.03	0.02	0.02	0.04	0.13	0.03	0.02	0.05	0.02	0.01	0.04	0.27	0.02
cg12374431	VAX2	Pure Island	Within	0.11	0.12	0.1	0.03	0.11	0.04	0.05	0.07	0.05	0.06	0.07	0.65	0.75	0.22	0.55	0.76	0.84	0.07	0.83	0.42	0.94	0.93	0.51	0.71	0.48	0.81	0.14	0.88	0.4	0.21	0.05	0.38	0.59	0.61	0.9	0.63	0.51	0.39	0.95	0.2	0.93	0.37	0.64	0.77	0.39	0.16
cg12379775	ZNF512B	Pure Island	Within	0.07	0.03	0.03	0.01	0.04	0.03	0.1	0.09	0.03	0.01	0.05	0.92	0.67	0.32	0.82	0.05	0.06	0.05	0.26	0.08	0.95	0.97	0.14	0.02	0.18	0.02	0.01	0.36	0.02	0.11	0.06	0.61	0.01	0.03	0.01	0.68	0.62	0.28	0.04	0.05	0.92	0.03	0.51	0.44	0.93	0.11
cg12388309	PAK7	Pure Island	Within	0.11	0.11	0.05	0.03	0.03	0.04	0.03	0.04	0.04	0.03	0.05	0.04	0.96	0.56	0.14	0.07	0.54	0.07	0.87	0.59	0.81	0.87	0.36	0.03	0.04	0.02	0.03	0.49	0.02	0.02	0.04	0.32	0.02	0.02	0.87	0.08	0.73	0.63	0.96	0.23	0.98	0.03	0.03	0.3	0.61	0.31
cg12400881	PPL	Pure Island	Within	0.04	0.14	0.11	0.03	0.03	0.02	0.02	0.03	0.02	0.02	0.02	0.9	0.4	0.02	0.53	0.04	NA	0.03	0.05	0.04	0.03	0.9	0.09	0.03	0.03	0.03	0.02	0.03	0.02	0.04	0.02	0.67	0.02	0.09	0.02	0.02	0.03	0.02	0.02	0.02	0.88	0.03	0.03	0.12	0.06	0.04
cg12419067	CRELD1	Pure Island	Within	0.08	0.07	0.09	0.03	0.05	0.04	0.05	0.08	0.05	0.02	0.08	0.07	0.05	0.07	0.89	0.07	0.08	0.06	0.07	0.08	0.06	0.06	0.04	0.05	0.05	0.04	0.03	0.05	0.07	0.05	0.05	0.05	0.02	0.06	0.09	0.1	0.06	0.13	0.07	0.09	0.06	0.12	0.06	0.15	0.16	0.04
cg12420104	DMRT3	Pure Island	Within	0.09	0.08	0.09	0.03	0.06	0.09	0.12	0.08	0.04	0.03	0.05	0.64	0.96	0.34	0.21	0.7	0.5	0.5	0.33	0.31	0.92	0.9	0.62	0.37	0.27	0.85	0.05	0.79	0.02	0.11	0.04	0.85	0.49	0.12	0.83	0.84	0.84	0.44	0.96	0.71	0.93	0.09	0.74	0.92	0.78	0.81
cg12422683	MICAL2	Pure Island	Within	0.13	0.09	0.04	0.11	0.04	0.04	0.03	0.04	0.04	0.04	0.02	0.04	0.18	0.03	0.12	0.07	0.1	0.07	0.09	0.13	0.11	0.1	0.03	0.03	0.02	0.05	0.08	0.02	0.04	0.06	0.02	0.12	0.12	0.06	0.02	0.04	0.05	0.02	0.03	0.02	0.04	0.04	0.03	0.11	0.07	0.04
cg12424817	LAPTM4B	Pure Island	Within	0.06	0.06	0.04	0.03	0.04	0.04	0.05	0.05	0.04	0.03	0.03	0.05	0.05	0.04	0.06	0.06	0.06	0.05	0.08	0.07	0.34	0.83	0.04	0.03	0.04	0.04	0.03	0.03	0.03	0.04	0.04	0.03	0.03	0.04	0.07	0.05	0.05	0.06	0.05	0.04	0.04	0.04	0.05	0.06	0.06	0.04
cg12434587	MGMT	Pure Island	Within	0.1	0.1	0.06	0.02	0.08	0.01	0.02	0.02	0.02	0.01	0.02	0.26	0.04	0.41	0.55	0.05	0.08	0.07	0.5	0.89	0.9	0.08	0.02	0.57	0.57	0.02	0.02	0.43	0.02	0.01	0.06	0.42	0.92	0.55	0.02	0.02	0.05	0.02	0.45	0.08	0.02	0.03	0.02	0.54	0.44	0.02
cg12435758	LGI2	Pure Island	Within	0.03	0.04	0.02	0.01	0.03	0.02	0.03	0.02	0.03	0.01	0.02	0.02	0.02	0.04	0.03	0.04	0.04	0.03	0.06	0.04	0.87	0.14	0.02	0.01	0.01	0.02	0.02	0.02	0.01	0.01	0.02	0.01	0.01	0.01	0.02	0.03	0.13	0.02	0.02	0.59	0.03	0.03	0.04	0.5	0.04	0.02
cg12454725	SYT7	Pure Island	Within	0.07	0.06	0.03	0.06	0.03	0.03	0.02	0.03	0.02	0.01	0.01	0.03	0.03	0.02	0.09	0.04	0.05	0.04	0.06	0.11	0.13	0.91	0.01	0.01	0.01	0.02	0.03	0.01	0.01	0.01	0.02	0.01	0.05	0.01	0.01	0.02	0.02	0.01	0.02	0.01	0.02	0.02	0.01	0.09	0.04	0.03
cg12485020	CHRDL1	Pure Island	Within	0.11	0.11	0.08	0.2	0.15	0.16	0.22	0.16	0.09	0.13	0.21	0.08	0.06	0.4	0.4	0.85	0.2	0.09	0.13	0.15	0.84	0.75	0.18	0.03	0.05	0.91	0.38	0.25	0.04	0.04	0.03	0.81	0.15	0.95	0.96	0.9	0.92	0.92	0.93	0.64	0.96	0.06	0.06	0.82	0.07	0.07
cg12497564	RBP1	Pure Island	Within	0.05	0.08	0.05	0.1	0.02	0.02	0.01	0.02	0.02	0.01	0.13	0.04	0.98	0.82	0.92	0.76	0.05	0.14	0.06	0.07	0.94	0.95	0.52	0.01	0.05	0.98	0.07	0.56	0.01	0.01	0.37	0.92	0.75	0.08	0.98	0.09	0.96	0.98	0.98	0.87	0.99	0.04	0.02	0.05	0.25	0.28
cg12506971	AADAT	Pure Island	Within	0.09	0.1	0.05	0.04	0.04	0.03	0.04	0.04	0.04	0.04	0.04	0.06	0.04	0.04	0.13	0.06	0.09	0.09	0.13	0.13	0.09	0.08	0.02	0.03	0.03	0.03	0.04	0.08	0.03	0.03	0.03	0.03	0.04	0.04	0.03	0.03	0.1	0.03	0.03	0.39	0.03	0.06	0.04	0.09	0.06	0.04
cg12507125	WWTR1	Pure Island	Within	0.09	0.09	0.07	0.03	0.05	0.04	0.04	0.04	0.03	0.04	0.04	0.07	0.16	0.05	0.08	0.08	0.09	0.05	0.07	0.12	0.88	0.5	0.02	0.04	0.03	0.11	0.04	0.02	0.03	0.03	0.04	0.02	0.97	0.34	0.04	0.5	0.94	0.53	0.54	0.05	0.04	0.04	0.07	0.08	0.07	0.03
cg12515638	SFRP4	Pure Island	Within	0.16	0.06	0.08	0.02	0.04	0.04	0.06	0.05	0.05	0.02	0.13	0.48	0.05	0.85	0.72	0.88	0.5	0.61	0.91	0.55	0.9	0.93	0.41	0.16	0.21	0.97	0.04	0.4	0.06	0.37	0.2	0.82	0.21	0.03	0.97	0.97	0.89	0.83	0.5	0.62	0.97	0.04	0.65	0.89	0.58	0.38
cg12529801	C16orf72	Pure Island	Within	0.03	0.02	0.02	0.07	0.03	0.03	0.04	0.03	0.03	0.03	0.03	0.02	0.03	0.08	0.12	0.04	0.04	0.03	0.11	0.03	0.16	0.2	0.01	0.02	0.02	0.02	0.02	0.02	0.02	0.02	0.02	0.03	0.04	0.01	0.02	0.16	0.04	0.02	0.34	0.06	0.95	0.03	0.03	0.14	0.08	0.02
cg12531003	ZNF580	Pure Island	Within	0.09	0.09	0.05	0.04	0.04	0.05	0.03	0.04	0.04	0.03	0.04	0.06	0.04	0.04	0.09	0.07	0.09	0.06	0.08	0.09	0.08	0.07	0.02	0.02	0.02	0.04	0.05	0.02	0.02	0.02	0.02	0.03	0.03	0.03	0.04	0.03	0.07	0.03	0.03	0.04	0.03	0.03	0.03	0.12	0.07	0.03
cg12539975	PRDM12	Pure Island	Within	0.09	0.1	0.07	0.13	0.08	0.05	0.07	0.06	0.06	0.07	0.08	0.36	0.2	0.25	0.16	0.64	0.28	0.26	0.84	0.75	0.86	0.85	0.3	0.03	0.61	0.77	0.89	0.71	0.72	0.57	0.2	0.79	0.08	0.03	0.74	0.38	0.8	0.7	0.63	0.94	0.95	0.67	0.77	0.79	0.44	0.64
cg12563178	PLXDC2	Pure Island	Within	0.05	0.06	0.04	0.03	0.02	0.03	0.02	0.03	0.03	0.03	0.03	0.03	0.03	0.03	0.09	0.04	0.05	0.04	0.68	0.19	0.9	0.93	0.12	0.7	0.11	0.02	0.02	0.28	0.02	0.03	0.02	0.14	0.01	0.03	0.24	0.42	0.36	0.61	0.96	0.25	0.62	0.23	0.89	0.92	0.06	0.33
cg12567315	TSPAN13	Pure Island	Within	0.05	0.06	0.06	0.03	0.04	0.05	0.04	0.04	0.04	0.03	0.04	0.05	0.04	0.05	0.58	0.05	0.09	0.05	0.13	0.07	0.1	0.5	0.05	0.03	0.03	0.03	0.02	0.07	0.03	0.03	0.04	0.05	0.02	0.04	0.03	0.03	0.12	0.03	0.03	0.05	0.58	0.04	0.04	0.09	0.07	0.04
cg12569516	TRPS1	Pure Island	Within	0.12	0.13	0.07	0.19	0.03	0.05	0.03	0.04	0.04	0.06	0.04	0.1	0.06	0.06	0.14	0.08	0.1	0.08	0.12	0.17	0.42	0.46	0.05	0.04	0.04	0.04	0.04	0.04	0.04	0.04	0.05	0.05	0.04	0.05	0.06	0.05	0.09	0.06	0.05	0.05	0.05	0.06	0.05	0.79	0.08	0.04
cg12586262	ZNF160	Pure Island	Within	0.19	0.25	0.1	0.11	0.06	0.1	0.09	0.07	0.12	0.2	0.08	0.12	0.1	0.09	0.44	0.12	0.14	0.17	0.19	0.24	0.76	0.22	0.06	0.05	0.65	0.07	0.08	0.22	0.16	0.06	0.15	0.07	0.24	0.06	0.08	0.1	0.08	0.06	0.06	0.08	0.09	0.06	0.07	0.12	0.12	0.06
cg12594641	LYPD6	Pure Island	Within	0.04	0.05	0.04	0.02	0.03	0.03	0.03	0.03	0.03	0.01	0.03	0.03	0.98	0.03	0.04	0.03	0.04	0.04	0.07	0.05	0.05	0.03	0.38	0.02	0.03	0.02	0.02	0.02	0.01	0.02	0.02	0.02	0.01	0.02	0.02	0.02	0.04	0.02	0.02	0.03	0.98	0.05	0.02	0.05	0.03	0.02
cg12601757	ST6GALNAC3	Pure Island	Within	0.05	0.06	0.04	0.07	0.05	0.06	0.05	0.06	0.05	0.05	0.04	0.36	0.57	0.24	0.51	0.8	0.37	0.05	0.05	0.1	0.89	0.78	0.02	0.02	0.03	0.75	0.04	0.02	0.03	0.03	0.06	0.02	0.06	0.03	0.23	0.04	0.08	0.05	0.33	0.04	0.8	0.06	0.04	0.28	0.18	0.08
cg12601987	RASD1	Pure Island	Within	0.06	0.08	0.04	0.05	0.07	0.05	0.04	0.06	0.04	0.03	0.05	0.94	0.06	0.11	0.9	0.1	0.06	0.9	0.07	0.08	0.12	0.52	0.1	0.04	0.11	0.14	0.11	0.09	0.04	0.05	0.05	0.21	0.04	0.08	0.05	0.07	0.11	0.06	0.06	0.26	0.34	0.05	0.06	0.59	0.08	0.09
cg12616277	FAM62C	Pure Island	Within	0.17	0.2	0.16	0.09	0.07	0.07	0.07	0.07	0.1	0.04	0.15	0.58	0.14	0.35	0.3	0.71	0.13	0.59	0.36	0.26	0.88	0.92	0.61	0.07	0.66	0.87	0.61	0.46	0.13	0.1	0.21	0.17	0.05	0.45	0.87	0.89	0.83	0.27	0.56	0.24	0.86	0.17	0.12	0.81	0.14	0.22
cg12618251	FZD7	Pure Island	Within	0.1	0.08	0.08	0.05	0.06	0.07	0.07	0.08	0.07	0.04	0.07	0.08	0.09	0.09	0.1	0.08	0.07	0.08	0.12	0.12	0.38	0.26	0.07	0.07	0.07	0.07	0.04	0.07	0.07	0.07	0.07	0.07	0.05	0.06	0.07	0.06	0.09	0.07	0.05	0.11	0.07	0.08	0.07	0.44	0.1	0.07
cg12622986	BARHL1	Pure Island	Within	0.07	0.07	0.04	0.05	0.13	0.09	0.15	0.19	0.12	0.03	0.09	0.24	0.95	0.18	0.35	0.38	0.26	0.33	0.48	0.27	0.88	0.82	0.32	0.18	0.52	0.15	0.72	0.4	0.06	0.81	0.13	0.93	0.43	0.04	0.49	0.05	0.53	0.8	0.91	0.64	0.96	0.08	0.18	0.59	0.86	0.74
cg12626085	UEVLD	Pure Island	Within	0.05	0.08	0.03	NA	0.05	0.05	0.04	0.04	0.04	0.09	0.03	0.03	0.03	0.03	0.07	0.06	0.05	0.07	0.09	0.06	0.11	0.07	0.02	0.03	0.02	0.03	0.03	0.02	0.02	0.02	0.02	0.01	0.11	0.01	0.02	0.03	0.04	0.03	0.03	0.02	0.02	0.05	0.03	0.08	0.05	0.04
cg12627583	AC080164.6	Associated Island	Within	0.08	0.09	0.06	0.06	0.04	0.06	0.05	0.05	0.04	0.04	0.13	0.84	0.61	0.67	0.9	0.7	0.86	0.46	0.53	0.52	0.84	0.89	0.92	0.04	0.94	0.94	0.05	0.93	0.05	0.85	0.4	0.92	0.89	0.93	0.93	0.6	0.86	0.94	0.93	0.13	0.91	0.06	0.87	0.85	0.49	0.92
cg12629325	PCDHA13	Pure Island	Within	0.1	NA	0.05	0.11	0.04	0.03	0.04	0.04	0.03	0.05	0.02	0.06	0.97	0.04	0.5	0.55	0.08	0.49	0.74	0.73	NA	NA	0.06	0.02	0.02	0.48	0.08	0.03	0.03	0.03	0.03	0.54	0.13	0.07	0.96	0.95	0.91	0.92	0.93	0.47	0.53	0.94	0.97	0.68	0.62	0.38
cg12631737	FUT4	Pure Island	Within	0.07	0.07	0.04	0.05	0.08	0.09	0.1	0.1	0.09	0.04	0.09	0.04	0.04	0.22	0.06	0.14	0.53	0.08	0.08	0.05	0.05	0.05	0.03	0.04	0.03	0.5	0.04	0.03	0.04	0.04	0.06	0.04	0.03	0.11	0.04	0.04	0.09	0.04	0.03	0.04	0.26	0.05	0.04	0.08	0.12	0.08
cg12686016	HOXA1	Pure Island	Within	0.07	0.08	0.06	0.21	0.07	0.09	0.08	0.09	0.07	0.24	0.05	0.05	0.05	0.04	0.22	0.54	0.06	0.34	0.09	0.07	0.09	0.47	0.13	0.55	0.04	0.25	0.69	0.17	0.03	0.93	0.3	0.94	0.38	0.07	0.04	0.06	0.45	0.05	0.18	0.96	0.96	0.04	0.41	0.15	0.69	0.19
cg12691366	AC008074.1	Pure Island	Within	0.05	0.07	0.03	0.01	0.02	0.02	0.01	0.02	0.02	0.01	0.01	0.02	0.02	0.02	0.09	0.03	0.04	0.03	0.06	0.09	0.07	0.04	0.01	0.01	0.01	0.02	0.01	0.01	0.01	0.01	0.02	0.02	0.01	0.02	0.01	0.01	0.03	0.02	0.01	0.02	0.01	0.03	0.01	0.03	0.05	0.02
cg12717668	ZNF655	Pure Island	Within	0.1	0.13	0.12	0.07	0.11	0.1	0.09	0.11	0.12	0.05	0.05	0.07	0.08	0.07	0.12	0.45	0.47	0.11	0.9	0.7	0.12	0.09	0.04	0.04	0.05	0.48	0.06	0.04	0.05	0.05	0.06	0.06	0.08	0.31	0.06	0.48	0.09	0.64	0.31	0.09	0.06	0.09	0.22	0.13	0.1	0.08
cg12727374	MAP6D1	Pure Island	Within	0.08	0.07	0.04	0.02	0.02	0.04	0.02	0.02	0.03	0.01	0.03	0.03	0.03	0.03	0.37	0.06	0.06	0.04	0.08	0.09	0.08	0.06	0.01	0.02	0.03	0.03	0.03	0.02	0.03	0.02	0.02	0.02	0.01	0.04	0.03	0.03	0.04	0.02	0.15	0.2	0.03	0.04	0.02	0.13	0.07	0.03
cg12739034	PTGER3	Pure Island	Within	0.1	0.08	0.07	0.06	0.04	0.03	0.04	0.05	0.04	0.04	0.08	0.42	0.19	0.49	0.5	0.05	0.77	0.05	0.44	0.58	0.93	0.92	0.19	0.1	0.2	0.04	0.03	0.22	0.04	0.05	0.05	0.15	0.03	0.06	0.88	0.19	0.82	0.6	0.93	0.33	0.94	0.07	0.43	0.79	0.51	0.27
cg12741420	IRF4	Pure Island	Within	0.07	0.1	0.05	0.02	0.04	0.06	0.07	0.04	0.05	0.02	0.05	0.8	0.25	0.69	0.3	0.91	0.6	0.51	0.91	0.87	0.88	0.88	0.31	0.54	0.89	0.92	0.56	0.55	0.46	0.09	0.05	0.93	0.03	0.9	0.95	0.85	0.8	0.94	0.93	0.95	0.96	0.75	0.93	0.9	0.71	0.84
cg12748258	HR	Pure Island	Within	0.11	0.11	0.06	0.04	0.03	0.03	0.18	0.03	0.02	0.01	0.05	0.96	0.05	0.03	0.14	0.06	0.13	0.07	0.1	0.13	0.11	0.88	0.38	0.03	0.02	0.02	0.02	0.18	0.02	0.01	0.03	0.02	0.95	0.1	0.02	0.02	0.21	0.56	0.9	0.06	0.98	0.04	0.03	0.22	0.9	0.02
cg12774845	C14orf45	Pure Island	Within	0.16	0.11	0.06	0.06	0.08	0.08	0.06	0.08	0.07	0.08	0.06	0.08	0.77	0.31	0.15	0.37	0.36	0.07	0.51	0.45	0.58	0.5	0.14	0.08	0.07	0.75	0.08	0.07	0.43	0.16	0.43	0.18	0.18	0.24	0.18	0.43	0.34	0.23	0.06	0.5	0.09	0.08	0.07	0.13	0.1	0.09
cg12781218	C7orf31	Pure Island	Within	0.06	0.06	0.04	0.1	0.07	0.09	0.08	0.08	0.08	0.18	0.05	0.05	0.04	0.03	0.05	0.77	0.16	0.05	0.11	0.06	0.07	0.05	0.03	0.03	0.03	0.63	0.04	0.02	0.02	0.03	0.03	0.03	0.05	0.03	0.03	0.04	0.06	0.03	0.05	0.05	0.04	0.04	0.02	0.2	0.09	0.04
cg12796229	C18orf43	Pure Island	Within	0.07	0.05	0.04	0.02	0.04	0.04	0.05	0.05	0.05	0.04	0.04	0.04	0.04	0.03	0.57	0.06	0.08	0.06	0.09	0.08	0.1	0.06	0.02	0.02	0.02	0.03	0.03	0.02	0.03	0.03	0.03	0.03	0.02	0.03	0.02	0.03	0.08	0.03	0.03	0.03	0.03	0.03	0.02	0.05	0.05	0.03
cg12799895	NPTX2	Pure Island	Within	0.08	0.09	0.06	0.01	0.02	0.05	0.23	0.12	0.04	0.02	0.07	0.97	0.98	0.7	0.77	0.96	0.8	0.8	0.62	0.39	0.96	0.97	0.46	0.01	0.9	0.98	0.02	0.55	0.01	0.02	0.53	0.13	0.21	0.87	0.98	0.62	0.97	0.98	0.5	0.99	0.98	0.98	0.97	0.96	0.79	0.86
cg12803724	FAM164A	Pure Island	Within	0.1	0.08	0.06	0.14	0.05	0.05	0.05	0.06	0.04	0.1	0.04	0.05	0.95	0.04	0.13	0.09	0.88	0.54	0.12	0.16	0.14	0.08	0.02	0.03	0.03	0.03	0.09	0.02	0.03	0.03	0.03	0.03	0.09	0.03	0.04	0.05	0.1	0.05	0.06	0.06	0.06	0.07	0.12	0.06	0.07	0.04
cg12808992	ULBP2	Pure Island	Within	0.11	0.09	0.06	0.17	0.05	0.06	0.06	0.06	0.05	0.06	0.04	0.05	0.05	0.05	0.09	0.08	0.1	0.08	0.09	0.09	0.08	0.09	0.04	0.04	0.04	0.05	0.05	0.04	0.04	0.05	0.05	0.05	0.1	0.04	0.05	0.05	0.08	0.07	0.05	0.06	0.05	0.07	0.06	0.23	0.07	0.04
cg12823748	USP15	Pure Island	Within	0.07	0.04	0.05	0.05	0.08	0.08	0.07	0.08	0.09	0.04	0.07	0.16	0.05	0.06	0.07	0.08	0.05	0.07	0.08	0.05	0.05	0.04	0.02	0.02	0.03	0.05	0.05	0.03	0.03	0.03	0.04	0.03	0.02	0.03	0.04	0.05	0.06	0.05	0.04	0.05	0.04	0.04	0.05	0.12	0.08	0.05
cg12832649	SPOCK1	Pure Island	Within	0.03	0.02	0.03	0.02	0.04	0.05	0.03	0.06	0.09	0.02	0.03	0.02	0.55	0.04	0.03	0.39	0.44	0.47	0.95	0.96	0.91	0.98	0.29	0.02	0.02	0.53	0.02	0.51	0.02	0.03	0.03	0.23	0.01	0.72	0.98	0.97	0.93	0.97	0.98	0.38	0.85	0.26	0.02	0.85	0.83	0.04
cg12839593	SIX1	Pure Island	Within	0.08	0.09	0.05	0.08	0.03	0.07	0.04	0.05	0.05	0.05	0.04	0.04	0.57	0.04	0.1	0.46	0.09	0.59	0.12	0.11	0.94	0.9	0.03	0.02	0.03	0.32	0.03	0.02	0.02	0.02	0.03	0.03	0.04	0.03	0.47	0.51	0.48	0.05	0.58	0.03	0.03	0.05	0.34	0.08	0.1	0.04
cg12847373	EDNRB	Pure Island	Within	0.06	0.09	0.06	0.11	0.02	0.03	0.03	0.03	0.03	0.03	0.06	0.77	0.26	0.3	0.7	0.59	0.49	0.06	0.74	0.58	0.82	0.82	0.29	0.79	0.29	0.81	0.04	0.15	0.27	0.03	0.05	0.04	0.03	0.86	0.71	0.62	0.73	0.88	0.82	0.65	0.85	0.65	0.84	0.74	0.09	0.39
cg12848131	KLF5	Pure Island	Within	0.12	0.09	0.04	0.03	0.02	0.02	0.02	0.02	0.02	0.01	0.01	0.04	0.03	0.03	0.12	0.05	0.06	0.06	0.08	0.08	0.1	0.1	0.02	0.02	0.02	0.02	0.02	0.02	0.02	0.01	0.03	0.04	0.02	0.02	0.02	0.02	0.04	0.02	0.02	0.03	0.03	0.03	0.02	0.06	0.04	0.02
cg12858460	EOMES	Pure Island	Within	0.16	0.18	0.13	0.09	0.06	0.06	0.06	0.07	0.05	0.04	0.06	0.87	0.06	0.07	0.23	0.23	0.17	0.65	0.32	0.19	0.68	0.74	0.05	0.38	0.05	0.05	0.05	0.06	0.04	0.04	0.05	0.08	0.04	0.06	0.88	0.48	0.86	0.1	0.34	0.91	0.07	0.06	0.91	0.09	0.64	0.06
cg12870705	NRP1	Pure Island	Within	0.16	0.13	0.05	0.04	0.04	0.03	0.03	0.03	0.03	0.02	0.03	0.67	0.07	0.04	0.17	0.1	0.14	0.09	0.17	0.15	0.13	0.72	0.05	0.04	0.04	0.04	0.03	0.03	0.04	0.04	0.05	0.04	0.03	0.05	0.04	0.05	0.1	0.05	0.04	0.04	0.04	0.07	0.03	0.16	0.06	0.05
cg12874092	VIM	Pure Island	Within	0.03	0.03	0.01	0.02	0.03	0.03	0.02	0.03	0.03	0.03	0.02	0.02	0.98	0.11	0.03	0.93	0.03	0.98	0.04	0.02	0.95	0.96	0.01	0.35	0.01	0.97	0.03	0.01	0.02	0.01	0.15	0.01	0.88	0.01	0.96	0.27	0.93	0.19	0.96	0.97	0.01	0.03	0.96	0.95	0.45	0.01
cg12879297	C16orf46	Pure Island	Within	0.06	0.04	0.04	0.02	0.03	0.04	0.04	0.04	0.03	0.02	0.05	0.04	0.04	0.04	0.05	0.05	0.05	0.04	0.06	0.05	0.04	0.04	0.03	0.03	0.03	0.03	0.03	0.03	0.03	0.02	0.03	0.04	0.02	0.03	0.03	0.06	0.04	0.07	0.03	0.04	0.04	0.05	0.04	0.06	0.06	0.04
cg12880658	CDO1	Pure Island	Within	0.06	0.09	0.05	0.05	0.03	0.03	0.03	0.04	0.02	0.03	0.16	0.56	0.05	0.43	0.37	0.81	0.42	0.62	0.85	0.91	0.8	0.91	0.3	0.02	0.76	0.85	0.88	0.47	0.89	0.64	0.91	0.8	0.69	0.55	0.92	0.87	0.62	0.92	0.94	0.87	0.91	0.79	0.56	0.86	0.77	0.86
cg12893143	UNC5A	Pure Island	Within	0.09	0.09	0.07	0.04	0.04	0.04	0.03	0.07	0.03	0.02	0.05	0.06	0.65	0.04	0.28	0.07	0.08	0.04	0.19	0.07	0.06	0.05	0.23	0.02	0.04	0.04	0.06	0.16	0.07	0.03	0.26	0.04	0.02	0.04	0.08	0.05	0.59	0.27	0.05	0.05	0.14	0.05	0.03	0.1	0.13	0.03
cg12914362	FZD8	Pure Island	Within	0.04	0.04	0.04	0.02	0.03	0.04	0.03	0.04	0.03	0.02	0.03	0.03	0.04	0.03	0.05	0.05	0.26	0.04	0.07	0.08	0.51	0.61	0.03	0.03	0.04	0.03	0.02	0.25	0.02	0.03	0.03	0.03	0.22	0.03	0.03	0.03	0.12	0.03	0.46	0.94	0.04	0.04	0.03	0.49	0.05	0.03
cg12928668	SEMA6A	Pure Island	Within	0.08	0.1	0.08	0.1	0.04	0.04	0.04	0.04	0.04	0.05	0.05	0.11	0.05	0.05	0.56	0.07	0.12	0.06	0.35	0.15	0.85	0.59	0.03	0.03	0.04	0.04	0.03	0.05	0.03	0.03	0.03	0.07	0.04	0.05	0.08	0.06	0.07	0.23	0.04	0.05	0.54	0.06	0.04	0.06	0.37	0.04
cg12955583	KNDC1	Pure Island	Within	0.03	0.04	0.04	0.02	0.02	0.02	0.02	0.02	0.02	0.01	0.12	0.03	0.25	0.2	0.06	0.04	0.07	0.02	0.04	0.05	0.52	0.03	0.01	0.02	0.02	0.02	0.01	0.02	0.02	0.02	0.02	0.01	0.02	0.02	0.03	0.06	0.06	0.03	0.02	0.04	0.03	0.03	0.02	0.05	0.04	0.02
cg12981137	MGMT	Pure Island	Within	0.1	0.07	0.03	0.02	0.19	0.02	0.01	0.02	0.01	0.01	0.02	0.51	0.03	0.3	0.53	0.05	0.09	0.05	0.43	0.91	0.95	0.09	0.02	0.94	0.61	0.02	0.01	0.46	0.02	0.01	0.03	0.51	0.99	0.81	0.02	0.01	0.04	0.02	0.39	0.03	0.02	0.02	0.01	0.38	0.42	0.02
cg12998491	FAM78A	Pure Island	Within	0.03	0.04	0.02	0.01	0.02	0.02	0.01	0.03	0.01	0.01	0.03	0.98	0.02	0.95	0.4	0.9	0.06	0.97	0.36	0.07	0.96	0.97	0.29	0.01	0.3	0.98	0.02	0.02	0.01	0.47	0.08	0.59	0.01	0.02	0.99	0.94	0.97	0.03	0.99	0.87	0.14	0.02	0.98	0.65	0.96	0.02
cg12998614	KISS1R	Pure Island	Within	0.09	0.14	0.17	0.03	0.06	0.05	0.06	0.05	0.06	0.05	0.2	0.72	0.38	0.7	0.69	0.69	0.87	0.37	0.26	0.1	0.92	0.88	0.94	0.08	0.14	0.92	0.03	0.45	0.41	0.72	0.3	0.86	0.04	0.22	0.64	0.96	0.14	0.03	0.54	0.91	0.95	0.35	0.69	0.09	0.93	0.62
cg13021192	CTSZ	Pure Island	Within	0.15	0.14	0.09	0.13	0.08	0.08	0.07	0.08	0.09	0.04	0.03	0.11	0.09	0.04	0.25	0.86	0.11	0.08	0.12	0.15	0.14	0.12	0.03	0.95	0.03	0.97	0.03	0.03	0.04	0.02	0.03	0.03	0.95	0.11	0.03	0.05	0.04	0.03	0.05	0.06	0.04	0.06	0.03	0.08	0.11	0.02
cg13021384	SLC27A2	Pure Island	Within	0.06	0.05	0.07	0.02	0.03	0.03	0.02	0.03	0.04	0.02	0.06	0.11	0.03	0.07	0.74	0.33	0.07	0.07	0.07	0.07	0.07	0.06	0.29	0.02	0.03	0.52	0.41	0.22	0.03	0.03	0.02	0.56	0.01	0.03	0.03	0.04	0.05	0.03	0.03	0.57	0.61	0.03	0.02	0.35	0.08	0.03
cg13031432	NDRG4	Pure Island	Within	0.06	0.07	0.04	0.12	0.04	0.04	0.04	0.04	0.04	0.03	0.02	0.33	0.1	0.08	0.17	0.26	0.24	0.06	0.47	0.82	0.88	0.9	0.08	0.02	0.02	0.9	0.04	0.02	0.02	0.02	0.02	0.03	0.12	0.02	0.96	0.95	0.86	0.46	0.9	0.96	0.17	0.06	0.95	0.76	0.79	0.02
cg13033853	FIBCD1	Pure Island	Within	0.1	0.11	0.05	0.11	0.08	0.08	0.1	0.1	0.08	0.07	0.04	0.05	0.06	0.05	0.13	0.09	0.09	0.08	0.08	0.11	0.14	0.08	0.03	0.03	0.03	0.04	0.07	0.03	0.05	0.03	0.04	0.04	0.03	0.03	0.04	0.06	0.07	0.14	0.05	0.04	0.04	0.07	0.05	0.07	0.14	0.05
cg13042487	XRCC3	Pure Island	Within	0.08	0.1	0.09	0.02	0.04	0.04	0.05	0.08	0.09	0.02	0.05	0.04	0.04	0.06	0.14	0.2	0.11	0.07	0.17	0.08	0.07	0.07	0.04	0.05	0.1	0.09	0.09	0.13	0.08	0.08	0.12	0.03	0.03	0.03	0.05	0.11	0.07	0.05	0.48	0.92	0.06	0.03	0.4	0.35	0.15	0.03
cg13060997	CCNA1	Pure Island	Within	0.09	0.12	0.09	0.14	0.04	0.04	0.04	0.04	0.03	0.06	0.05	0.76	0.21	0.04	0.53	0.21	0.11	0.81	0.87	0.82	0.89	0.89	0.08	0.03	0.06	0.02	0.05	0.16	0.03	0.04	0.04	0.03	0.05	0.7	0.94	0.91	0.92	0.92	0.94	0.9	0.91	0.2	0.85	0.83	0.06	0.03
cg13079099	LENG9	Pure Island	Within	0.06	0.06	0.06	0.02	0.04	0.03	0.03	0.03	0.03	0.02	0.04	0.9	0.04	0.04	0.27	0.06	0.05	0.05	0.08	0.06	0.07	0.06	0.03	0.05	0.04	0.03	0.02	0.13	0.03	0.02	0.03	0.03	0.42	0.12	0.03	0.03	0.06	0.04	0.03	0.05	0.06	0.05	0.06	0.06	0.05	0.03
cg13117105	PAQR5	Pure Island	Within	0.07	0.08	0.06	0.03	0.03	0.04	0.04	0.05	0.03	0.02	0.04	0.46	0.48	0.04	0.27	0.45	0.05	0.05	0.07	0.07	0.06	0.56	0.1	0.03	0.03	0.4	0.03	0.03	0.05	0.04	0.03	0.03	0.03	0.03	0.09	0.06	0.05	0.05	0.03	0.08	0.04	0.08	0.05	0.06	0.04	0.03
cg13127386	SLC4A8	Pure Island	Within	0.09	0.09	0.05	0.03	0.03	0.05	0.03	0.04	0.03	0.02	0.04	0.04	0.07	0.06	0.07	0.06	0.15	0.05	0.1	0.09	0.88	0.88	0.03	0.03	0.03	0.03	0.02	0.03	0.03	0.03	0.06	0.03	0.02	0.04	0.25	0.1	0.6	0.04	0.05	0.18	0.03	0.05	0.04	0.12	0.31	0.04
cg13151102	KCNJ4	Pure Island	Within	0.16	0.11	0.11	0.06	0.05	0.05	0.05	0.05	0.03	0.04	0.06	0.08	0.06	0.05	0.31	0.1	0.14	0.1	0.17	0.21	0.44	0.32	0.04	0.04	0.04	0.04	0.04	0.03	0.04	0.04	0.04	0.06	0.06	0.03	0.34	0.28	0.37	0.04	0.29	0.78	0.06	0.05	0.05	0.11	0.36	0.04
cg13163729	SIX3	Associated Island	Within	0.08	0.07	0.06	0.06	0.06	0.06	0.08	0.05	0.07	0.04	0.08	0.65	0.83	0.32	0.2	0.8	0.12	0.06	0.78	0.39	0.79	0.88	0.47	0.03	0.87	0.8	0.89	0.09	0.05	0.04	0.06	0.15	0.86	0.06	0.85	0.82	0.8	0.88	0.85	0.55	0.56	0.46	0.34	0.74	0.31	0.5
cg13168683	JAKMIP1	Pure Island	Within	0.09	0.1	0.06	0.05	0.11	0.11	0.13	0.12	0.15	0.08	0.08	0.04	0.92	0.62	0.23	0.07	0.76	0.1	0.08	0.09	0.86	0.91	0.04	0.04	0.04	0.05	0.05	0.04	0.03	0.04	0.05	0.04	0.03	0.04	0.91	0.88	0.85	0.87	0.93	0.89	0.51	0.06	0.83	0.44	0.11	0.05
cg13168820	PTPRT	Pure Island	Within	0.05	0.06	0.05	0.03	0.03	0.03	0.03	0.06	0.03	0.01	0.03	0.03	0.94	0.21	0.07	0.46	0.77	0.04	0.86	0.89	0.86	0.91	0.45	0.4	0.43	0.91	0.61	0.39	0.1	0.25	0.05	0.89	0.36	0.73	0.93	0.85	0.81	0.94	0.91	0.94	0.95	0.42	0.63	0.88	0.82	0.91
cg13169373	APP	Pure Island	Within	0.06	0.07	0.07	0.03	0.04	0.04	0.04	0.04	0.04	0.02	0.04	0.03	0.03	0.03	0.1	0.04	0.05	0.04	0.04	0.04	0.06	0.05	0.01	0.02	0.02	0.03	0.09	0.01	0.02	0.01	0.03	0.02	0.02	0.03	0.06	0.06	0.04	0.04	0.02	0.02	0.04	0.04	0.03	0.05	0.06	0.03
cg13184872	PNPLA3	Pure Island	Within	0.11	0.13	0.08	0.06	0.12	0.13	0.13	0.13	0.13	0.12	0.07	0.07	0.53	0.04	0.17	0.09	0.14	0.12	0.11	0.12	0.14	0.12	0.04	0.03	0.04	0.04	0.06	0.04	0.04	0.03	0.04	0.04	0.03	0.04	0.04	0.05	0.06	0.04	0.06	0.05	0.04	0.07	0.03	0.1	0.53	0.05
cg13191049	SYNM	Pure Island	Within	0.07	0.08	0.14	0.08	0.07	0.05	0.09	0.07	0.05	0.03	0.05	0.96	0.57	0.84	0.91	0.93	0.06	0.95	0.58	0.12	0.91	0.94	0.03	0.03	0.03	0.97	0.07	0.38	0.03	0.08	0.03	0.89	0.06	0.04	0.98	0.98	0.93	0.05	0.97	0.48	0.39	0.05	0.31	0.94	0.16	0.04
cg13191808	PCSK9	Pure Island	Within	0.06	0.05	0.05	0.02	0.03	0.04	0.03	0.04	0.03	0.02	0.02	0.91	0.94	0.5	0.19	0.88	0.06	0.92	0.08	0.06	0.05	0.87	0.59	0.23	0.8	0.95	0.97	0.35	0.35	0.66	0.03	0.34	0.14	0.75	0.05	0.03	0.1	0.04	0.04	0.06	0.96	0.07	0.04	0.07	0.13	0.03
cg13216057	DKK3	Pure Island	Within	0.13	0.16	0.07	0.05	0.04	0.02	0.03	0.04	0.04	0.03	0.02	0.06	0.95	0.26	0.29	0.89	0.86	0.71	0.54	0.45	0.92	0.93	0.07	0.02	0.04	0.91	0.06	0.02	0.02	0.05	0.03	0.9	0.05	0.05	0.96	0.4	0.89	0.04	0.93	0.72	0.91	0.03	0.72	0.73	0.89	0.03
cg13226172	CNTFR	Pure Island	Within	0.11	0.1	0.04	0.06	0.05	0.05	0.05	0.05	0.06	0.05	0.03	0.15	0.11	0.1	0.15	0.43	0.2	0.1	0.27	0.17	0.82	0.86	0.14	0.02	0.03	0.52	0.24	0.13	0.03	0.03	0.1	0.24	0.04	0.03	0.84	0.22	0.37	0.18	0.84	0.83	0.4	0.04	0.79	0.6	0.4	0.11
cg13234643	CTSL2	Pure Island	Within	0.07	0.07	0.04	0.03	0.03	0.04	0.03	0.03	0.03	0.03	0.03	0.05	0.05	0.04	0.18	0.06	0.08	0.05	0.09	0.08	0.07	0.18	0.02	0.03	0.02	0.03	0.03	0.02	0.03	0.02	0.03	0.04	0.03	0.03	0.03	0.04	0.04	0.03	0.04	0.3	0.04	0.04	0.03	0.07	0.1	0.03
cg13246654	CAMK2D	Pure Island	Within	0.11	0.11	0.07	0.05	0.02	0.03	0.03	0.03	0.02	0.03	0.04	0.06	0.61	0.06	0.16	0.15	0.11	0.89	0.1	0.15	0.12	0.13	0.01	0.02	0.02	0.31	0.04	0.02	0.02	0.02	0.02	0.02	0.04	0.03	0.09	0.08	0.06	0.06	0.04	0.06	0.06	0.05	0.03	0.09	0.05	0.02
cg13263483	GJB3	Associated Island	Within	0.05	0.06	0.03	0.06	0.05	0.04	0.05	0.05	0.04	0.03	0.03	0.04	0.19	0.03	0.59	0.54	0.04	0.05	0.05	0.04	0.04	0.92	0.4	0.02	0.35	0.65	0.03	0.03	0.03	0.05	0.04	0.18	0.11	0.03	0.02	0.03	0.04	0.57	0.05	0.04	0.04	0.06	0.02	0.08	0.07	0.03
cg13265789	UNC5C	Pure Island	Within	0.07	0.06	0.04	0.2	0.03	0.05	0.03	0.04	0.03	0.07	0.05	0.05	0.91	0.21	0.12	0.06	0.12	0.31	0.82	0.71	0.87	0.87	0.25	0.1	0.04	0.05	0.05	0.18	0.03	0.04	0.04	0.03	0.04	0.61	0.78	0.48	0.83	0.91	0.88	0.88	0.88	0.05	0.89	0.85	0.25	0.46
cg13272258	USP2	Pure Island	Within	0.07	0.08	0.05	0.05	0.03	0.03	0.03	0.03	0.03	0.03	0.03	0.84	0.04	0.05	0.08	0.05	0.06	0.05	0.07	0.08	0.08	0.09	0.02	0.02	0.02	0.03	0.03	0.02	0.02	0.02	0.02	0.02	0.02	0.03	0.03	0.04	0.06	0.06	0.03	0.05	0.04	0.04	0.03	0.06	0.05	0.03
cg13274254	GULP1	Pure Island	Within	0.06	0.06	0.04	0.08	0.05	0.04	0.04	0.05	0.06	0.14	0.04	0.52	0.94	0.03	0.07	0.19	0.57	0.05	0.08	0.27	0.27	0.06	0.03	0.02	0.03	0.17	0.04	0.03	0.03	0.02	0.03	0.02	0.04	0.07	0.03	0.04	0.09	0.04	0.03	0.03	0.06	0.04	0.04	0.07	0.08	0.13
cg13274713	TBX2	Pure Island	Within	0.04	0.03	0.04	0.03	0.02	0.01	0.02	0.02	0.02	0.01	0.02	0.94	0.5	0.02	0.04	0.33	0.04	0.02	0.05	0.03	0.93	0.94	0.28	0.01	0.02	0.17	0.02	0.02	0.01	0.01	0.11	0.02	0.26	0.02	0.96	0.47	0.91	0.04	0.94	0.54	0.02	0.03	0.95	0.8	0.9	0.02
cg13277716	KAL1	Pure Island	Within	0.07	0.08	0.05	0.04	0.03	0.03	0.03	0.03	0.03	0.04	0.15	0.04	0.04	0.33	0.12	0.05	0.06	0.04	0.8	0.86	0.85	0.89	0.33	0.22	0.02	0.03	0.03	0.2	0.02	0.03	0.02	0.05	0.02	0.93	0.92	0.82	0.9	0.03	0.85	0.05	0.95	0.04	0.03	0.83	0.15	0.04
cg13285447	NUMBL	Pure Island	Within	0.06	0.09	0.02	0.21	0.03	0.04	0.03	0.05	0.04	0.07	0.02	0.03	0.03	0.02	0.04	0.04	0.04	0.06	0.03	0.06	0.05	0.05	0.02	0.02	0.01	0.03	0.04	0.01	0.01	0.02	0.02	0.02	0.07	0.02	0.03	0.02	0.03	0.02	0.03	0.02	0.02	0.04	0.03	0.09	0.04	0.03
cg13297865	ELOVL4	Pure Island	Within	0.04	0.03	0.06	0.02	0.02	0.02	0.02	0.06	0.02	0.01	0.01	0.03	0.57	0.14	0.79	0.31	0.04	0.02	0.94	0.86	0.95	0.96	0.32	0.01	0.05	0.03	0.01	0.01	0.01	0.02	0.02	0.02	0.01	0.02	0.99	0.99	0.97	0.47	0.98	0.98	0.99	0.61	0.99	0.96	0.96	0.19
cg13301933	RORA	Pure Island	Within	0.11	0.1	0.05	0.19	0.04	0.04	0.04	0.05	0.04	0.05	0.04	0.04	0.89	0.05	0.11	0.07	0.33	0.07	0.79	0.85	0.86	0.85	0.04	0.03	0.02	0.03	0.04	0.06	0.02	0.03	0.03	0.03	0.03	0.03	0.89	0.91	0.85	0.04	0.88	0.03	0.31	0.04	0.02	0.75	0.2	0.03
cg13306164	HPCA	Pure Island	Within	0.03	0.02	0.02	0.01	0.03	0.03	0.03	0.03	0.03	0.02	0.02	0.02	0.01	0.06	0.05	0.21	0.36	0.04	0.07	0.03	0.96	0.96	0.39	0.01	0.01	0.02	0.01	0.04	0.01	0.01	0.02	0.02	0.01	0.01	0.63	0.01	0.44	0.03	0.5	0.06	0.46	0.02	0.06	0.27	0.46	0.02
cg13310628	SOLH	Pure Island	Within	0.05	0.04	0.04	0.02	0.03	0.03	0.04	0.03	0.03	0.02	0.02	0.04	0.05	0.02	0.06	0.04	0.04	0.05	0.07	0.05	0.03	0.04	0.02	0.02	0.04	0.02	0.02	0.14	0.23	0.04	0.03	0.02	0.05	0.02	0.02	0.02	0.06	0.02	0.03	0.94	0.03	0.03	0.03	0.08	0.06	0.02
cg13313036	SLC29A2	Pure Island	Within	0.05	0.05	0.04	0.02	0.02	0.01	0.02	0.02	0.02	0.01	0.02	0.02	0.02	0.02	0.26	0.03	0.04	0.03	0.04	0.03	0.04	0.03	0.01	0.02	0.01	0.02	0.01	0.02	0.01	0.01	0.02	0.02	0.02	0.02	0.02	0.02	0.03	0.02	0.02	0.03	0.02	0.03	0.01	0.05	0.05	0.01
cg13323474	TTC18	Pure Island	Within	0.11	0.14	0.09	0.25	0.07	0.09	0.06	0.08	0.08	0.17	0.13	0.09	0.08	0.13	0.11	0.14	0.1	0.09	0.15	0.15	0.15	0.33	0.2	0.05	0.07	0.05	0.05	0.05	0.04	0.06	0.05	0.58	0.1	0.07	0.05	0.1	0.08	0.11	0.73	0.09	0.1	0.09	0.07	0.61	0.11	0.06
cg13325666	MLLT4	Pure Island	Within	0.07	0.08	0.05	0.02	0.03	0.03	0.03	0.03	0.03	0.02	0.03	0.04	0.05	0.03	0.06	0.05	0.07	0.05	0.07	0.09	0.07	0.06	0.02	0.03	0.03	0.03	0.03	0.02	0.03	0.03	0.03	0.03	0.02	0.03	0.03	0.03	0.07	0.03	0.03	0.04	0.04	0.04	0.03	0.05	0.06	0.03
cg13332925	AGPS	Pure Island	Within	0.09	0.08	0.04	0.02	0.03	0.02	0.02	0.02	0.04	0.04	0.02	0.04	0.03	0.03	0.1	0.92	0.08	0.55	0.07	0.09	0.06	0.06	0.08	0.02	0.02	0.97	0.02	0.02	0.02	0.02	0.02	0.02	0.02	0.02	0.02	0.02	0.05	0.02	0.02	0.03	0.02	0.03	0.02	0.08	0.05	0.02
cg13352495	CCNO	Pure Island	Within	0.11	0.13	0.13	0.02	0.06	0.04	0.04	0.05	0.05	0.03	0.05	0.07	0.22	0.08	0.13	0.17	0.08	0.07	0.13	0.1	0.09	0.13	0.1	0.03	0.05	0.05	0.05	0.04	0.05	0.04	0.04	0.09	0.03	0.14	0.06	0.1	0.06	0.17	0.33	0.14	0.09	0.19	0.05	0.1	0.07	0.04
cg13353683	PTRF	Pure Island	Within	0.1	0.09	0.05	0.04	0.03	0.04	0.04	0.05	0.03	0.07	0.03	0.06	0.1	0.05	0.1	0.08	0.15	0.06	0.1	0.13	0.09	0.09	0.03	0.05	0.03	0.05	0.03	0.03	0.03	0.03	0.1	0.03	0.04	0.17	0.06	0.03	0.07	0.04	0.05	0.05	0.04	0.05	0.02	0.09	0.09	0.04
cg13359415	LGI2	Pure Island	Within	0.08	0.08	0.03	0.02	0.02	0.02	0.02	0.02	0.02	0.01	0.03	0.03	0.03	0.24	0.25	0.05	0.07	0.05	0.16	0.13	0.95	0.55	0.38	0.02	0.02	0.02	0.01	0.01	0.01	0.02	0.02	0.02	0.01	0.01	0.02	0.02	0.08	0.02	0.13	0.51	0.02	0.02	0.37	0.95	0.07	0.02
cg13365761	SCNN1G	Pure Island	Within	0.07	0.07	0.06	0.08	0.08	0.08	0.08	0.08	0.07	0.05	0.05	0.79	0.12	0.05	0.3	0.11	0.07	0.07	0.17	0.1	0.92	0.93	0.1	0.04	0.04	0.05	0.07	0.15	0.03	0.04	0.06	0.08	0.06	0.03	0.79	0.11	0.07	0.66	0.62	0.7	0.7	0.07	0.06	0.65	0.08	0.22
cg13378388	VEGFC	Pure Island	Within	0.09	0.07	0.06	0.05	0.04	0.05	0.03	0.04	0.04	0.03	0.03	0.06	0.06	0.04	0.09	0.05	0.58	0.05	0.91	0.9	0.96	0.94	0.14	0.03	0.03	0.03	0.06	0.05	0.03	0.03	0.04	0.03	0.05	0.95	0.91	0.88	0.88	0.91	0.95	0.45	0.04	0.05	0.96	0.82	0.07	0.04
cg13384396	ADCY5	Pure Island	Within	0.13	0.11	0.11	0.06	0.06	0.07	0.09	0.1	0.06	0.07	0.13	0.46	0.85	0.48	0.45	0.31	0.52	0.11	0.7	0.25	0.88	0.88	0.3	0.06	0.17	0.62	0.08	0.14	0.1	0.11	0.26	0.51	0.08	0.18	0.95	0.88	0.87	0.73	0.94	0.79	0.92	0.08	0.96	0.86	0.89	0.09
cg13401339	FKBP1B	Pure Island	Within	0.1	0.08	0.1	0.07	0.05	0.05	0.05	0.05	0.05	0.06	0.05	0.91	0.55	0.22	0.92	0.87	0.86	0.08	0.58	0.24	0.9	0.95	0.46	0.05	0.89	0.88	0.12	0.06	0.44	0.69	0.2	0.94	0.95	0.93	0.61	0.91	0.9	0.96	0.93	0.47	0.58	0.13	0.11	0.43	0.53	0.29
cg13401831	TUBA8	Pure Island	Within	0.16	0.09	0.11	0.04	0.05	0.14	0.06	0.05	0.04	0.02	0.06	0.79	0.07	0.15	0.4	0.11	0.08	0.08	0.1	0.15	0.16	0.11	0.56	0.05	0.93	0.06	0.11	0.37	0.07	0.15	0.06	0.92	0.03	0.9	0.13	0.84	0.08	0.53	0.15	0.16	0.77	0.11	0.13	0.86	0.12	0.06
cg13401987	APH1B	Pure Island	Within	0.04	0.04	0.02	0.01	0.03	0.03	0.02	0.03	0.02	0.01	0.02	0.03	0.03	0.02	0.07	0.05	0.05	0.03	0.05	0.05	0.03	0.03	0.02	0.02	0.01	0.02	0.02	0.02	0.02	0.02	0.02	0.02	0.02	0.02	0.02	0.02	0.06	0.03	0.02	0.03	0.02	0.03	0.02	0.05	0.05	0.02
cg13425637	PRKCH	Pure Island	Within	0.1	0.06	0.04	0.15	0.04	0.04	0.04	0.03	0.03	0.05	0.02	0.04	0.03	0.02	0.37	0.04	0.07	0.05	0.1	0.14	0.92	0.9	0.02	0.02	0.02	0.02	0.03	0.02	0.02	0.02	0.02	0.11	0.03	0.03	0.03	0.04	0.08	0.03	0.03	0.03	0.09	0.04	0.02	0.13	0.05	0.04
cg13427055	HERC5	Pure Island	Within	0.04	0.04	0.02	0.05	0.03	0.03	0.03	0.03	0.02	0.02	0.02	0.81	0.02	0.03	0.06	0.03	0.03	0.03	0.06	0.05	0.32	0.45	0.01	0.02	0.01	0.02	0.02	0.01	0.01	0.01	0.02	0.02	0.02	0.02	0.02	0.02	0.03	0.02	0.02	0.02	0.02	0.03	0.02	0.03	0.04	0.02
cg13436799	LRP2	Pure Island	Within	0.11	NA	0.07	NA	0.11	0.08	0.09	0.09	0.07	0.09	0.07	0.53	0.07	0.08	0.16	0.17	0.18	0.06	0.24	0.15	NA	NA	0.05	0.06	0.05	0.07	0.05	0.05	0.04	0.04	0.05	0.05	0.14	0.06	0.76	0.3	0.71	0.06	0.81	0.83	0.27	0.09	0.15	0.63	0.08	0.14
cg13438834	FAM118A	Pure Island	Within	0.04	0.06	0.03	0.02	0.03	0.04	0.05	0.03	0.04	0.02	0.03	0.03	0.05	0.05	0.19	0.06	0.07	0.13	0.49	0.1	0.06	0.11	0.33	0.19	0.22	0.07	0.04	0.47	0.28	0.45	0.2	0.87	0.12	0.01	0.02	0.45	0.29	0.01	0.87	0.09	0.12	0.02	0.01	0.57	0.07	0.09
cg13449778	FAM163A	Pure Island	Within	0.05	0.06	0.05	0.02	0.03	0.04	0.05	0.03	0.03	0.02	0.1	0.5	0.4	0.57	0.53	0.73	0.11	0.45	0.66	0.44	0.93	0.89	0.63	0.05	0.08	0.98	0.01	0.32	0.02	0.05	0.14	0.49	0.01	0.6	0.98	0.98	0.96	0.97	0.97	0.94	0.27	0.11	0.54	0.9	0.96	0.57
cg13488201	ADAM12	Pure Island	Within	0.04	0.15	0.13	0.06	0.04	0.04	0.04	0.04	0.04	0.03	0.1	0.81	0.96	0.37	0.97	0.9	0.75	0.81	0.94	0.92	0.95	0.92	0.81	0.95	0.97	0.91	0.97	0.74	0.96	0.67	0.58	0.46	0.96	0.79	0.96	0.93	0.87	0.95	0.96	0.96	0.98	0.95	0.97	0.92	0.9	0.04
cg13494498	TUBB3	Pure Island	Within	0.05	0.05	0.06	0.03	0.06	0.06	0.04	0.07	0.07	0.06	0.03	0.03	0.6	0.04	0.08	0.06	0.12	0.74	0.06	0.05	0.04	0.04	0.03	0.03	0.03	0.13	0.02	0.03	0.03	0.03	0.07	0.06	0.02	0.04	0.15	0.06	0.16	0.11	0.03	0.05	0.04	0.05	0.11	0.06	0.04	0.04
cg13496736	OVOL1	Pure Island	Within	0.07	0.08	0.11	0.01	0.02	0.02	0.02	0.03	0.02	0.01	0.21	0.93	0.92	0.04	0.71	0.05	0.05	0.04	0.92	0.47	0.09	0.95	0.53	0.97	0.96	0.02	0.97	0.95	0.18	0.71	0.02	0.97	0.99	0.55	0.07	0.09	0.06	0.09	0.03	0.27	0.98	0.76	0.09	0.11	0.14	0.59
cg13501999	CACNB1	Pure Island	Within	0.11	0.12	0.05	0.06	0.04	0.05	0.05	0.04	0.04	0.05	0.04	0.06	0.05	0.04	0.08	0.08	0.13	0.06	0.11	0.11	0.09	0.08	0.03	0.03	0.03	0.03	0.03	0.03	0.02	0.02	0.03	0.03	0.03	0.03	0.03	0.6	0.06	0.03	0.04	0.05	0.04	0.05	0.03	0.1	0.05	0.04
cg13510327	NEU1	Pure Island	Within	0.06	0.1	0.05	0.07	0.04	0.05	0.04	0.03	0.04	0.05	0.02	0.04	0.03	0.04	0.08	0.05	0.05	0.05	0.08	0.11	0.13	0.06	0.02	0.02	0.02	0.02	0.02	0.01	0.02	0.02	0.02	0.02	0.06	0.02	0.03	0.04	0.04	0.03	0.34	0.03	0.57	0.29	0.03	0.04	0.05	0.03
cg13514050	GGT7	Pure Island	Within	0.07	0.07	0.05	0.03	0.04	0.03	0.04	0.04	0.04	0.03	0.09	0.05	0.05	0.28	0.26	0.09	0.1	0.06	0.87	0.06	0.85	0.83	0.04	0.03	0.03	0.04	0.02	0.04	0.03	0.02	0.03	0.05	0.02	0.04	0.46	0.03	0.26	0.11	0.94	0.23	0.14	0.03	0.03	0.54	0.2	0.03
cg13523557	ADCY1	Pure Island	Within	0.08	0.17	0.2	0.09	0.2	0.12	0.09	0.13	0.11	0.08	0.09	0.6	0.87	0.56	0.24	0.41	0.44	0.46	0.8	0.72	0.88	0.89	0.7	0.68	0.11	0.86	0.21	0.53	0.44	0.46	0.21	0.45	0.88	0.22	0.63	0.54	0.68	0.7	0.88	0.76	0.91	0.19	0.54	0.77	0.4	0.55
cg13539030	ARL4C	Pure Island	Within	0.06	0.05	0.04	0.03	0.02	0.03	0.03	0.04	0.03	0.02	0.03	0.03	0.96	0.03	0.38	0.05	0.08	0.05	0.1	0.11	0.05	0.08	0.02	0.02	0.02	0.03	0.03	0.02	0.02	0.02	0.04	0.03	0.02	0.03	0.03	0.02	0.13	0.02	0.03	0.04	0.02	0.03	0.03	0.14	0.08	0.03
cg13548361	FBXL15	Pure Island	Within	0.03	0.05	0.04	0.07	0.06	0.05	0.04	0.06	0.05	0.1	0.09	0.03	0.92	0.29	0.4	0.8	0.75	0.05	0.18	0.06	0.83	0.74	0.29	0.02	0.3	0.66	0.11	0.24	0.06	0.41	0.29	0.68	0.18	0.03	0.7	0.58	0.47	0.09	0.89	0.93	0.94	0.32	0.2	0.57	0.45	0.45
cg13562542	EIF4E3	Pure Island	Within	0.05	0.06	0.05	0.02	0.04	0.06	0.04	0.07	0.03	0.02	0.07	0.05	0.13	0.46	0.58	0.06	0.07	0.04	0.94	0.78	0.95	0.96	0.79	0.02	0.04	0.03	0.04	0.49	0.02	0.02	0.05	0.35	0.02	0.6	0.97	0.96	0.95	0.54	0.98	0.25	0.99	0.04	0.07	0.96	0.52	0.18
cg13574590	CCND2	Pure Island	Within	0.05	0.14	0.04	0.04	0.07	0.06	0.08	0.06	0.07	0.06	0.04	0.56	0.06	0.39	0.72	0.32	0.44	0.19	0.56	0.38	0.39	0.05	0.04	0.14	0.16	0.08	0.04	0.08	0.03	0.04	0.06	0.04	0.45	0.08	0.03	0.94	0.21	0.04	0.44	0.42	0.74	0.06	0.93	0.86	0.09	0.64
cg13643585	HOXB9	Pure Island	Within	0.08	0.05	0.03	0.03	0.07	0.07	0.05	0.06	0.05	0.04	0.03	0.03	0.96	0.05	0.06	0.08	0.41	0.05	0.05	0.08	0.04	0.04	0.09	0.01	0.01	0.07	0.04	0.01	0.02	0.01	0.03	0.01	0.01	0.02	0.01	0.01	0.03	0.05	0.02	0.02	0.02	0.02	0.01	0.02	0.43	0.04
cg13643796	ADAMTS3	Associated Island	Within	0.07	0.1	0.05	0.03	0.04	0.05	0.03	0.05	0.04	0.08	0.06	0.03	0.05	0.04	0.1	0.09	0.09	0.05	0.5	0.4	0.86	0.92	0.02	0.03	0.03	0.22	0.08	0.02	0.03	0.03	0.03	0.34	0.91	0.06	0.92	0.41	0.89	0.9	0.92	0.92	0.47	0.05	0.92	0.68	0.08	0.14
cg13686115	PHYHIPL	Pure Island	Within	0.08	0.08	0.07	0.05	0.04	0.05	0.04	0.07	0.04	0.03	0.06	0.11	0.86	0.51	0.46	0.55	0.31	0.38	0.49	0.07	0.55	0.79	0.2	0.03	0.54	0.56	0.04	0.25	0.16	0.78	0.05	0.53	0.02	0.05	0.84	0.22	0.77	0.05	0.85	0.82	0.84	0.64	0.84	0.57	0.59	0.76
cg13694867	SIM2	Pure Island	Within	0.12	0.14	0.09	0.09	0.03	0.03	0.02	0.02	0.02	0.02	0.07	0.07	0.27	0.1	0.14	0.08	0.07	0.13	0.12	0.18	0.08	0.13	0.45	0.02	0.02	0.03	0.75	0.02	0.16	0.02	0.03	0.05	0.01	0.04	0.04	0.1	0.08	0.06	0.51	0.13	0.06	0.05	0.02	0.09	0.53	0.03
cg13705707	PRKAR2B	Pure Island	Within	0.06	0.09	0.1	0.06	0.05	0.05	0.05	0.05	0.04	0.02	0.06	0.06	0.05	0.08	0.06	0.08	0.07	0.05	0.11	0.08	0.15	0.87	0.04	0.05	0.05	0.05	0.03	0.05	0.04	0.04	0.05	0.05	0.03	0.04	0.9	0.12	0.61	0.09	0.13	0.5	0.09	0.07	0.38	0.1	0.11	0.05
cg13707395	ADAMTS15	Pure Island	Within	0.08	0.08	0.06	0.12	0.04	0.06	0.03	0.05	0.05	0.08	0.05	0.07	0.04	0.04	0.17	0.08	0.08	0.05	0.07	0.1	0.1	0.79	0.07	0.03	0.03	0.03	0.05	0.03	0.03	0.03	0.04	0.04	0.05	0.03	0.04	0.05	0.11	0.04	0.05	0.05	0.05	0.04	0.05	0.09	0.06	0.04
cg13714039	ZNF14	Pure Island	Within	0.04	0.04	0.02	0.02	0.03	0.03	0.02	0.04	0.02	0.02	0.02	0.03	0.11	0.04	0.05	0.04	0.03	0.03	0.46	0.92	0.93	0.03	0.01	0.01	0.02	0.02	0.03	0.02	0.02	0.01	0.02	0.01	0.02	0.02	0.02	0.04	0.05	0.03	0.32	0.02	0.02	0.04	0.02	0.03	0.03	0.03
cg13725272	AC121493.1	Pure Island	Within	0.04	0.03	0.02	0.02	0.03	0.03	0.02	0.03	0.02	0.02	0.02	0.03	0.03	0.02	0.04	0.04	0.05	0.03	0.06	0.03	0.03	0.03	0.02	0.02	0.02	0.02	0.02	0.02	0.02	0.02	0.02	0.02	0.01	0.02	0.02	0.02	0.05	0.03	0.02	0.02	0.03	0.03	0.03	0.05	0.03	0.02
cg13736875	UBE2C	Pure Island	Within	0.02	0.03	0.02	0.17	0.03	0.03	0.02	0.02	0.02	0.03	0.05	0.02	0.29	0.06	0.04	0.05	0.03	0.02	0.04	0.03	0.03	0.05	0.01	0.01	0.02	0.02	0.01	0.01	0.02	0.01	0.02	0.01	0.03	0.01	0.02	0.03	0.03	0.03	0.02	0.02	0.02	0.04	0.02	0.04	0.04	0.06
cg13756879	IGF2AS	Pure Island	Within	0.1	0.14	0.1	0.05	0.03	0.03	0.03	0.03	0.02	0.03	0.02	0.88	0.86	0.07	0.22	0.83	0.18	0.08	0.71	0.52	0.85	0.81	0.03	0.02	0.11	0.9	0.04	0.02	0.05	0.05	0.04	0.47	0.04	0.17	0.95	0.96	0.94	0.96	0.97	0.95	0.97	0.03	0.5	0.84	0.86	0.81
cg13758659	SDC1	Pure Island	Within	0.05	0.07	0.06	0.22	0.08	0.1	0.1	0.09	0.1	0.06	0.04	0.07	0.07	0.05	0.07	0.06	0.11	0.08	0.08	0.09	0.06	0.07	0.03	0.03	0.03	0.05	0.04	0.04	0.03	0.03	0.04	0.03	0.15	0.03	0.03	0.03	0.06	0.03	0.04	0.04	0.06	0.04	0.03	0.09	0.11	0.06
cg13760546	RNF125	Associated Island	Within	0.06	0.08	0.04	0.04	0.02	0.03	0.03	0.03	0.03	0.03	0.03	0.04	0.04	0.03	0.12	0.05	0.07	0.05	0.13	0.07	0.05	0.05	0.02	0.02	0.51	0.03	0.03	0.02	0.02	0.02	0.03	0.03	0.02	0.02	0.03	0.03	0.03	0.04	0.02	0.04	0.05	0.05	0.03	0.07	0.06	0.03
cg13765303	BOC	Pure Island	Within	0.09	0.09	0.05	0.02	0.03	0.04	0.04	0.05	0.02	0.02	0.08	0.05	0.06	0.27	0.29	0.44	0.08	0.06	0.16	0.48	0.66	0.59	0.37	0.02	0.06	0.83	0.82	0.55	0.28	0.26	0.07	0.47	0.03	0.43	0.6	0.45	0.71	0.49	0.87	0.84	0.5	0.14	0.6	0.81	0.53	0.3
cg13765785	SCN3B	Pure Island	Within	0.14	0.14	0.12	0.08	0.1	0.1	0.11	0.12	0.1	0.06	0.17	0.12	0.78	0.18	0.3	0.86	0.29	0.53	0.17	0.22	0.84	0.86	0.35	0.17	0.13	0.9	0.07	0.16	0.13	0.11	0.15	0.15	0.06	0.18	0.2	0.17	0.2	0.29	0.85	0.33	0.68	0.17	0.39	0.62	0.72	0.1
cg13775495	IL12A	Pure Island	Within	0.04	0.05	0.04	0.03	0.03	0.03	0.04	0.03	0.03	0.05	0.03	0.04	0.04	0.03	0.05	0.04	0.04	0.03	0.06	0.06	0.56	0.03	0.02	0.17	0.02	0.02	0.04	0.01	0.02	0.02	0.03	0.02	0.42	0.01	0.02	0.02	0.04	0.02	0.04	0.02	0.02	0.03	0.02	0.06	0.04	0.03
cg13784792	JUP	Pure Island	Within	0.07	0.09	0.07	0.08	0.04	0.05	0.05	0.05	0.04	0.06	0.04	0.09	0.06	0.05	0.48	0.07	0.13	0.06	0.1	0.09	0.07	0.8	0.04	0.04	0.04	0.04	0.04	0.05	0.04	0.04	0.04	0.05	0.05	0.04	0.04	0.05	0.12	0.04	0.04	0.05	0.19	0.05	0.05	0.11	0.06	0.04
cg13799206	ASRGL1	Associated Island	Within	0.11	0.07	0.07	0.02	0.02	0.02	0.02	0.03	0.02	0.02	0.07	0.28	0.03	0.34	0.16	0.28	0.08	0.05	0.12	0.09	0.1	0.95	0.14	0.02	0.02	0.36	0.04	0.02	0.02	0.02	0.02	0.13	0.02	0.02	0.02	0.03	0.05	0.03	0.03	0.04	0.08	0.04	0.03	0.08	0.47	0.02
cg13801416	AKR1B1	Pure Island	Within	0.06	0.05	0.04	0.04	0.03	0.04	0.04	0.05	0.04	0.03	0.03	0.04	0.04	0.03	0.07	0.95	0.14	0.88	0.9	0.59	0.94	0.94	0.32	0.02	0.02	0.98	0.02	0.15	0.02	0.02	0.03	0.02	0.02	0.97	0.99	0.98	0.94	0.5	0.98	0.04	0.03	0.04	0.02	0.36	0.06	0.03
cg13802364	RCOR2	Pure Island	Within	0.05	0.05	0.03	0.02	0.02	0.02	0.02	0.02	0.02	0.01	0.03	0.06	0.03	0.19	0.14	0.04	0.27	0.04	0.53	0.06	0.06	0.47	0.02	0.01	0.04	0.02	0.02	0.33	0.03	0.02	0.02	0.45	0.01	0.05	0.02	0.28	0.04	0.4	0.49	0.2	0.14	0.02	0.04	0.4	0.05	0.13
cg13809962	ZNF711	Pure Island	Within	0.08	0.08	0.05	0.19	0.17	0.17	0.23	0.2	0.19	0.04	0.15	0.04	0.21	0.23	0.13	0.08	0.07	0.06	0.11	0.08	0.79	0.11	0.15	0.03	0.03	0.12	0.03	0.03	0.03	0.03	0.04	0.03	0.08	0.03	0.44	0.06	0.11	0.04	0.04	0.1	0.89	0.05	0.09	0.1	0.31	0.11
cg13812587	NUP188	Pure Island	Within	0.05	0.03	0.02	0.04	0.04	0.05	0.04	0.06	0.04	0.04	0.07	0.04	0.27	0.25	0.24	0.06	0.13	0.03	0.37	0.06	0.05	0.64	0.06	0.01	0.06	0.04	0.03	0.38	0.02	0.02	0.03	0.06	0.03	0.02	0.04	0.05	0.11	0.04	0.95	0.92	0.33	0.04	0.05	0.39	0.24	0.04
cg13828839	FXYD6	Pure Island	Within	0.12	0.12	0.07	0.14	0.07	0.07	0.06	0.09	0.06	0.14	0.07	0.09	0.53	0.14	0.16	0.07	0.12	0.07	0.19	0.14	0.73	0.8	0.31	0.03	0.05	0.05	0.08	0.1	0.04	0.04	0.05	0.28	0.29	0.06	0.38	0.08	0.46	0.06	0.43	0.64	0.11	0.07	0.5	0.44	0.27	0.12
cg13877465	IGF2BP1	Pure Island	Within	0.09	0.13	0.04	0.05	0.09	0.07	0.05	0.05	0.06	0.05	0.03	0.98	0.82	0.05	0.07	0.25	0.06	0.09	0.06	0.05	NA	NA	0.02	0.04	0.02	0.03	0.02	0.02	0.02	0.01	0.02	0.02	0.05	0.02	0.18	0.04	0.8	0.01	0.59	0.76	0.97	0.23	0.03	0.79	0.35	0.02
cg13878010	ADCY5	Pure Island	Within	0.13	0.09	0.13	0.06	0.06	0.05	0.08	0.07	0.05	0.03	0.14	0.87	0.11	0.68	0.55	0.1	0.6	0.06	0.56	0.53	0.97	0.97	0.52	0.04	0.95	0.04	0.79	0.12	0.04	0.07	0.12	0.12	0.04	0.07	0.98	0.95	0.96	0.73	0.97	0.78	0.97	0.17	0.98	0.22	0.9	0.04
cg13894021	RAB36	Pure Island	Within	0.1	0.2	0.12	0.21	0.11	0.12	0.12	0.09	0.11	0.19	0.09	0.12	0.91	0.06	0.22	0.09	0.56	0.1	0.13	0.17	0.11	0.07	0.05	0.03	0.06	0.06	0.16	0.03	0.08	0.06	0.06	0.06	NA	0.05	0.1	0.14	0.18	0.98	0.07	0.09	0.15	0.21	0.04	0.08	0.11	0.38
cg13904771	C10orf47	Pure Island	Within	0.17	0.03	0.03	0.02	0.04	0.04	0.05	0.04	0.04	0.02	0.03	0.02	0.03	0.04	0.03	0.06	0.05	0.04	0.06	0.28	0.95	0.58	0.01	0.03	0.01	0.03	0.03	0.01	0.02	0.01	0.03	0.02	0.13	0.02	0.04	0.32	0.06	0.03	0.02	0.06	0.02	0.04	0.02	0.09	0.04	0.03
cg13912117	ADCY8	Pure Island	Within	0.08	0.05	0.02	0.15	0.03	0.07	0.03	0.03	0.05	0.02	0.04	0.99	0.98	0.69	0.35	0.91	0.94	0.15	0.95	0.97	0.96	0.97	0.83	0.01	0.98	0.96	0.97	0.61	0.55	0.95	0.54	0.98	0.87	0.97	0.99	0.96	0.98	0.97	0.95	0.97	0.99	0.92	0.98	0.94	0.89	0.92
cg13916322	PLA2G16	Pure Island	Within	0.08	0.09	0.07	0.07	0.04	0.05	0.05	0.06	0.04	0.06	0.04	0.91	0.17	0.04	0.1	0.08	0.08	0.07	0.09	0.11	0.09	0.09	0.03	0.03	0.03	0.09	0.05	0.03	0.03	0.02	0.03	0.03	0.03	0.11	0.04	0.05	0.08	0.04	0.04	0.04	0.5	0.05	0.08	0.1	0.06	0.03
cg13921352	FAM19A4	Pure Island	Within	0.06	0.09	0.09	0.12	0.04	0.05	0.04	0.05	0.05	0.09	0.08	0.7	0.94	0.46	0.36	0.28	0.37	0.18	0.88	0.86	0.93	0.93	0.22	0.03	0.05	0.61	0.04	0.08	0.02	0.03	0.05	0.3	0.08	0.5	0.8	0.36	0.65	0.95	0.91	0.94	0.94	0.19	0.8	0.55	0.71	0.08
cg13935507	ZHX2	Pure Island	Within	0.07	0.08	0.06	NA	0.11	0.12	0.08	0.1	0.09	0.11	0.07	0.07	0.05	0.09	0.09	0.09	0.11	0.08	0.13	0.09	0.06	0.2	0.03	0.03	0.05	0.06	0.07	0.04	0.03	0.04	0.05	0.04	0.1	0.04	0.07	0.07	0.16	0.1	0.06	0.08	0.09	0.09	0.09	0.1	0.11	0.09
cg13936125	GNAO1	Pure Island	Within	0.09	0.09	0.07	0.2	0.05	0.05	0.06	0.06	0.05	0.06	0.04	0.06	0.44	0.25	0.14	0.08	0.05	0.07	0.08	0.09	0.93	0.93	0.17	0.01	0.02	0.18	0.05	0.02	0.02	0.02	0.05	0.03	0.06	0.02	0.98	0.96	0.87	0.04	0.95	0.93	0.17	0.05	0.81	0.82	0.06	0.06
cg13958614	FOXD1	Pure Island	Within	0.05	0.06	0.05	0.03	0.08	0.11	0.07	0.12	0.09	0.03	0.04	0.05	0.06	0.05	0.06	0.37	0.07	0.58	0.08	0.11	0.07	0.06	0.05	0.05	0.04	0.04	0.03	0.06	0.05	0.05	0.05	0.05	0.03	0.03	0.04	0.04	0.4	0.05	0.04	0.53	0.05	0.04	0.05	0.15	0.86	0.05
cg13960192	GNA11	Pure Island	Within	0.16	0.12	0.08	0.04	0.03	0.04	0.04	0.04	0.03	0.03	0.03	0.09	0.92	0.18	0.18	0.12	0.13	0.1	0.29	0.2	0.15	0.14	0.07	0.03	0.03	0.04	0.03	0.04	0.09	0.02	0.03	0.06	0.04	0.05	0.13	0.03	0.17	0.06	0.03	0.08	0.05	0.06	0.05	0.06	0.06	0.06
cg13967780	SMAD7	Pure Island	Within	0.04	0.05	0.04	0.01	0.05	0.05	0.05	0.06	0.05	0.02	0.03	0.04	0.03	0.03	0.07	0.03	0.05	0.04	0.08	0.06	0.04	0.09	0.01	0.01	0.02	0.02	0.02	0.02	0.02	0.01	0.02	0.02	0.01	0.02	0.02	0.03	0.03	0.05	0.01	0.04	0.02	0.05	0.03	0.06	0.11	0.02
cg13983578	DUSP4	Pure Island	Within	0.04	0.06	0.04	0.03	0.04	0.03	0.03	0.03	0.03	0.04	0.03	0.97	0.03	0.03	0.06	0.05	0.05	0.03	0.09	0.05	0.05	0.03	0.02	0.02	0.02	0.02	0.03	0.02	0.02	0.02	0.02	0.02	0.02	0.02	0.03	0.02	0.06	0.03	0.03	0.04	0.06	0.06	0.03	0.08	0.04	0.03
cg13983870	TSPAN12	Pure Island	Within	0.07	0.1	0.06	0.08	0.07	0.05	0.04	0.05	0.06	0.09	0.05	0.09	0.06	0.05	0.11	0.07	0.63	0.07	0.1	0.1	0.07	0.07	0.03	0.03	0.03	0.05	0.05	0.03	0.03	0.03	0.03	0.04	0.05	0.05	0.05	0.06	0.07	0.05	0.05	0.04	0.1	0.06	0.05	0.11	0.09	0.05
cg13984181	ABHD7	Pure Island	Within	0.1	0.11	0.09	0.05	0.07	0.05	0.07	0.06	0.07	0.03	0.14	0.9	0.08	0.22	0.64	0.09	0.11	0.87	0.1	0.12	0.07	0.09	0.06	0.04	0.08	0.06	0.05	0.05	0.06	0.06	0.06	0.1	0.04	0.1	0.08	0.07	0.15	0.09	0.06	0.56	0.06	0.07	0.05	0.14	0.11	0.42
cg13986130	PTGS2	Pure Island	Within	0.08	0.08	0.05	0.24	0.07	0.09	0.1	0.09	0.08	0.21	0.06	0.08	0.06	0.04	0.11	0.07	0.81	0.04	0.31	NA	0.11	NA	0.18	0.03	0.04	0.04	0.06	0.06	0.04	0.02	0.03	0.03	0.15	0.05	0.05	0.07	0.08	0.05	0.09	0.05	0.89	0.08	0.07	0.11	0.09	0.58
cg14008883	SLC18A3	Pure Island	Within	0.12	0.11	0.1	0.04	0.06	0.07	0.1	0.12	0.06	0.04	0.1	0.26	0.92	0.91	0.44	0.86	0.84	0.61	0.85	0.82	0.81	0.84	0.46	0.09	0.61	0.91	0.48	0.46	0.06	0.92	0.59	0.92	0.08	0.53	0.94	0.92	0.82	0.94	0.89	0.91	0.92	0.6	0.86	0.88	0.85	0.87
cg14021073	BRSK2	Pure Island	Within	0.09	0.1	0.07	0.23	0.07	0.07	0.07	0.11	0.06	0.08	0.04	0.82	0.68	0.43	0.59	0.83	0.66	0.74	0.87	0.52	0.88	0.87	0.15	0.11	0.17	0.84	0.05	0.8	0.1	0.06	0.11	0.21	0.15	0.06	0.9	0.96	0.66	0.54	0.93	0.86	0.89	0.07	0.89	0.86	0.84	0.28
cg14037665	PXDN	Pure Island	Within	0.1	0.1	0.09	0.11	0.04	0.04	0.05	0.04	0.05	0.06	0.06	0.06	0.94	0.17	0.51	0.73	0.27	0.05	0.89	0.9	0.92	0.87	0.2	0.04	0.58	0.91	0.38	0.68	0.94	0.04	0.06	0.93	0.65	0.91	0.95	0.94	0.87	0.92	0.91	0.95	0.94	0.94	0.9	0.85	0.07	0.91
cg14055374	MAF	Pure Island	Within	0.04	0.07	0.04	0.06	0.03	0.03	0.04	0.04	0.03	0.05	0.03	0.03	0.04	0.04	0.14	0.06	0.14	0.03	0.07	0.06	0.87	0.48	0.31	0.03	0.04	0.06	0.03	0.03	0.02	0.03	0.06	0.03	0.04	0.04	0.03	0.05	0.19	0.04	0.22	0.2	0.71	0.04	0.06	0.87	0.07	0.32
cg14059729	KLRAQ1	Pure Island	Within	0.07	0.06	0.05	0.03	0.02	0.03	0.02	0.03	0.03	0.03	0.05	0.04	0.04	0.03	0.07	0.07	0.07	0.04	0.07	0.06	0.04	0.07	0.02	0.02	0.02	0.02	0.03	0.02	0.02	0.02	0.02	0.02	0.02	0.02	0.03	0.04	0.04	0.05	0.02	0.03	0.03	0.04	0.02	0.06	0.1	0.03
cg14061619	SH3BP4	Pure Island	Within	0.08	0.07	0.04	0.04	0.03	0.04	0.04	0.04	0.04	0.03	0.03	0.12	0.91	0.12	0.47	0.32	0.52	0.05	0.2	0.16	0.16	0.42	0.13	0.92	0.06	0.11	0.08	0.09	0.2	0.36	0.18	0.66	0.08	0.06	0.1	0.49	0.07	0.16	0.05	0.23	0.15	0.06	0.27	0.79	0.07	0.16
cg14080001	SH3PX3	No/Distant Island	Within	0.06	0.05	0.04	0.05	0.06	0.04	0.05	0.05	0.04	0.02	0.04	0.04	0.12	0.04	0.06	0.05	0.08	0.04	0.11	0.07	0.06	0.05	0.05	0.15	0.06	0.04	0.03	0.05	0.22	0.05	0.06	0.05	0.46	0.18	0.06	0.08	0.08	0.03	0.06	0.11	0.04	0.04	0.04	0.08	0.05	0.04
cg14089692	ADAM33	Pure Island	Within	0.14	0.13	0.07	0.17	0.04	0.04	0.04	0.04	0.04	0.08	0.07	0.89	0.67	0.34	0.49	0.83	0.16	0.12	0.83	0.19	0.84	0.86	0.66	0.09	0.8	0.87	0.77	0.74	0.26	0.23	0.13	0.9	0.77	0.91	0.87	0.89	0.81	0.86	0.88	0.48	0.91	0.24	0.22	0.8	0.45	0.16
cg14094960	EGFR	Pure Island	Within	0.08	0.07	0.03	0.02	0.03	0.02	0.02	0.02	0.02	0.01	0.02	0.57	0.98	0.02	0.08	0.04	0.04	0.06	0.05	0.06	0.04	0.05	0.01	0.02	0.01	0.02	0.04	0.01	0.02	0.02	0.02	0.02	0.01	0.02	0.02	0.02	0.04	0.01	0.02	0.01	0.02	0.03	0.01	0.1	0.04	0.02
cg14121103	ABHD5	Pure Island	Within	0.1	0.12	0.06	0.03	0.03	0.04	0.03	0.04	0.03	0.03	0.04	0.05	0.16	0.04	0.37	0.07	0.09	0.07	0.19	0.14	0.1	0.5	0.1	0.04	0.05	0.03	0.04	0.24	0.05	0.12	0.03	0.18	0.03	0.22	0.03	0.03	0.05	0.03	0.03	0.03	0.11	0.03	0.03	0.1	0.07	0.03
cg14133708	EMILIN2	Pure Island	Within	0.16	0.16	0.09	0.12	0.11	0.09	0.09	0.11	0.12	0.16	0.1	0.11	0.09	0.42	0.28	0.26	0.12	0.4	0.15	0.55	0.84	0.86	0.16	0.07	0.08	0.35	0.12	0.1	0.07	0.12	0.1	0.11	0.76	0.08	0.87	0.11	0.83	0.08	0.85	0.67	0.36	0.14	0.52	0.35	0.6	0.08
cg14147105	FAM125A	Pure Island	Within	0.04	0.05	0.04	0.03	0.07	0.07	0.07	0.08	0.06	0.03	0.04	0.05	0.09	0.04	0.06	0.05	0.06	0.05	0.07	0.06	0.74	0.22	0.03	0.03	0.03	0.04	0.03	0.03	0.03	0.03	0.08	0.03	0.94	0.03	0.02	0.09	0.11	0.09	0.89	0.04	0.05	0.05	0.04	0.08	0.13	0.05
cg14174099	SLC8A3	Pure Island	Within	0.04	0.06	0.05	0.23	0.03	0.04	0.05	0.04	0.03	0.1	0.03	0.05	0.42	0.13	0.09	0.17	0.08	0.05	0.1	0.07	0.88	0.83	0.2	0.02	0.03	0.41	0.03	0.18	0.02	0.02	0.05	0.23	0.1	0.02	0.97	0.91	0.83	0.05	0.95	0.39	0.78	0.94	0.26	0.83	0.92	0.03
cg14188232	ITGA11	Pure Island	Within	0.08	0.13	0.05	0.03	0.03	0.03	0.03	0.05	0.04	0.04	0.04	0.57	0.1	0.04	0.31	0.45	0.31	0.27	0.36	0.2	0.27	0.37	0.15	0.5	0.18	0.54	0.16	0.39	0.04	0.03	0.04	0.07	0.93	0.1	0.14	0.31	0.28	0.28	0.49	0.39	0.65	0.12	0.29	0.36	0.13	0.05
cg14201417	ADAMTSL2	Pure Island	Within	0.24	0.12	0.1	0.09	0.05	0.05	0.06	0.05	0.05	0.04	0.07	0.64	0.2	0.07	0.12	0.95	0.1	0.63	0.1	0.05	0.82	0.94	0.72	0.03	0.89	0.95	0.97	0.9	0.04	0.9	0.05	0.86	0.05	0.67	0.03	0.81	0.36	0.96	0.11	0.11	0.98	0.93	0.87	0.86	0.52	0.53
cg14204735	CYB561	Pure Island	Within	0.08	0.1	0.05	0.16	0.04	0.03	0.03	0.04	0.03	0.04	0.14	0.81	0.04	0.02	0.9	0.04	0.08	0.04	0.07	0.19	0.1	0.06	0.29	0.02	0.96	0.02	0.05	0.97	0.83	0.11	0.02	0.51	0.05	0.96	0.02	0.15	0.03	0.02	0.12	0.08	0.02	0.86	0.04	0.91	0.06	0.02
cg14218343	ZNF32	Pure Island	Within	0.11	0.09	0.05	0.09	0.05	0.05	0.05	0.04	0.04	0.1	0.08	0.07	0.2	0.7	0.6	0.14	0.15	0.08	0.84	0.39	0.85	0.37	0.06	0.05	0.19	0.25	0.06	0.32	0.35	0.34	0.18	0.71	0.12	0.48	0.2	0.86	0.1	0.11	0.43	0.28	0.06	0.05	0.42	0.76	0.21	0.05
cg14225485	FAM84A	Pure Island	Within	0.04	0.05	0.04	0.03	0.03	0.03	0.02	0.03	0.03	0.03	0.02	0.55	0.96	0.03	0.33	0.04	0.32	0.61	0.43	0.13	0.06	0.91	0.1	0.02	0.04	0.02	0.03	0.31	0.02	0.02	0.02	0.77	0.02	0.02	0.03	0.95	0.06	0.85	0.02	0.5	0.95	0.83	0.03	0.9	0.1	0.87
cg14225544	PLK2	Pure Island	Within	0.1	0.08	0.06	0.03	0.04	0.05	0.06	0.05	0.05	0.02	0.03	0.65	0.06	0.04	0.12	0.07	0.11	0.07	0.11	0.1	0.08	0.93	0.04	0.05	0.04	0.05	0.04	0.04	0.04	0.04	0.05	0.04	0.02	0.04	0.04	0.04	0.08	0.04	0.03	0.05	0.04	0.04	0.04	0.06	0.1	0.05
cg14228238	EVI1	Pure Island	Within	0.15	0.14	0.1	0.09	0.09	0.07	0.06	0.05	0.09	0.17	0.06	0.16	0.77	0.05	0.92	0.75	0.14	0.52	0.46	0.17	0.22	0.12	0.03	0.02	0.05	0.28	0.05	0.03	0.04	0.04	0.04	0.03	0.98	0.86	0.04	0.04	0.08	0.04	0.11	0.06	0.54	0.05	0.03	0.16	0.07	0.1
cg14228840	MICA	Pure Island	Within	0.03	0.03	0.03	0.05	0.05	0.05	0.03	0.07	0.04	0.05	0.03	0.02	0.04	0.03	0.02	0.04	0.03	0.03	0.05	0.03	0.03	0.03	0.01	0.01	0.01	0.02	0.02	0.01	0.01	0.01	0.02	0.01	0.18	0.01	0.01	0.02	0.03	0.02	0.02	0.02	0.03	0.04	0.02	0.03	0.05	0.03
cg14246617	MITF	Pure Island	Within	0.13	0.12	0.17	0.15	0.03	0.04	0.04	0.04	0.04	0.03	0.12	0.09	0.1	0.11	0.21	0.12	0.11	0.1	0.21	0.21	0.15	0.17	0.03	0.04	0.05	0.04	0.07	0.07	0.02	0.04	0.04	0.04	0.05	0.06	0.1	0.15	0.11	0.13	0.09	0.13	0.17	0.15	0.15	0.17	0.12	0.03
cg14249872	KCNK1	Pure Island	Within	0.05	0.05	0.04	0.03	0.03	0.04	0.05	0.04	0.03	0.01	0.03	0.05	0.91	0.03	0.06	0.05	0.06	0.67	0.06	0.17	0.04	0.06	0.4	0.03	0.04	0.03	0.03	0.21	0.03	0.03	0.03	0.04	0.5	0.07	0.04	0.02	0.05	0.52	0.02	0.04	0.86	0.05	0.03	0.06	0.06	0.07
cg14304761	SYK	Pure Island	Within	0.13	0.1	0.06	0.03	0.03	0.03	0.03	0.03	0.03	0.02	0.03	0.84	0.05	0.05	0.52	0.07	0.1	0.08	0.11	0.13	0.09	0.49	0.56	0.02	0.6	0.03	0.06	0.63	0.03	0.03	0.03	0.77	0.03	0.12	0.03	0.03	0.06	0.07	0.03	0.07	0.97	0.04	0.03	0.13	0.17	0.11
cg14310034	BMP4	Pure Island	Within	0.17	0.15	0.11	0.11	0.13	0.09	0.1	0.08	0.08	0.15	0.14	0.07	0.08	0.94	0.92	0.31	0.85	0.09	0.15	0.17	0.15	0.82	0.37	0.03	0.29	0.04	0.07	0.42	0.55	0.38	0.72	0.5	0.69	0.87	0.06	0.05	0.08	0.05	0.05	0.04	0.92	0.09	0.04	0.11	0.11	0.88
cg14311811	DSG2	Pure Island	Within	0.11	0.13	0.08	0.05	0.04	0.04	0.03	0.04	0.04	0.04	0.04	0.22	0.86	0.04	0.87	0.1	0.62	0.07	0.14	0.21	0.19	0.42	0.38	0.2	0.04	0.55	0.04	0.2	0.04	0.06	0.06	0.2	0.35	0.04	0.07	0.06	0.07	0.21	0.05	0.11	0.79	0.04	0.04	0.07	0.07	0.08
cg14324200	SAMD11	Pure Island	Within	0.07	0.1	0.11	0.02	0.03	0.05	0.03	0.05	0.03	0.02	0.05	0.37	0.66	0.34	0.45	0.2	0.08	0.03	0.18	0.05	0.85	0.82	0.82	0.2	0.18	0.05	0.12	0.94	0.83	0.16	0.24	0.67	0.77	0.36	0.05	0.9	0.1	0.77	0.29	0.11	0.88	0.61	0.68	0.19	0.51	0.42
cg14338887	GNMT	Pure Island	Within	0.07	0.09	0.06	0.12	0.04	0.04	0.05	0.06	0.04	0.05	0.04	0.97	0.98	0.05	0.67	0.05	0.08	0.07	0.12	0.11	0.12	0.97	0.72	0.02	0.98	0.04	0.34	0.35	0.03	0.04	0.03	0.97	0.1	0.42	0.05	0.08	0.16	0.06	0.05	0.06	0.99	0.06	0.05	0.12	0.07	0.05
cg14341579	IRS2	Pure Island	Within	0.05	0.03	0.03	0.02	0.03	0.03	0.02	0.02	0.02	0.01	0.01	0.97	0.03	0.02	0.06	0.04	0.05	0.03	0.05	0.04	0.03	0.03	0.12	0.07	0.02	0.02	0.04	0.24	0.02	0.01	0.02	0.02	0.02	0.02	0.02	0.02	0.06	0.02	0.02	0.04	0.02	0.04	0.02	0.06	0.03	0.03
cg14350002	GAS1	Pure Island	Within	0.11	0.12	0.06	0.03	0.04	0.04	0.03	0.05	0.03	0.03	0.03	0.06	0.05	0.04	0.12	0.05	0.09	0.06	0.12	0.14	0.11	0.09	0.02	0.03	0.03	0.03	0.05	0.02	0.03	0.03	0.04	0.03	0.03	0.03	0.04	0.03	0.06	0.04	0.04	0.06	0.04	0.06	0.03	0.1	0.78	0.03
cg14383135	NPAS2	Pure Island	Within	0.04	0.04	0.03	0.01	0.03	0.04	0.03	0.03	0.03	0.01	0.02	0.02	0.21	0.02	0.04	0.03	0.04	0.03	0.04	0.04	0.05	0.02	0.01	0.02	0.01	0.02	0.03	0.01	0.02	0.01	0.02	0.01	0.01	0.01	0.02	0.02	0.04	0.05	0.01	0.02	0.03	0.05	0.02	0.12	0.1	0.02
cg14384532	NTRK3	Pure Island	Within	0.05	0.06	0.05	0.02	0.05	0.04	0.05	0.05	0.06	0.02	0.2	0.86	0.63	0.56	0.6	0.89	0.74	0.83	0.79	0.71	0.86	0.89	0.53	0.84	0.03	0.86	0.37	0.57	0.13	0.07	0.25	0.51	0.61	0.72	0.86	0.87	0.85	0.89	0.89	0.87	0.9	0.68	0.79	0.74	0.73	0.58
cg14399078	ADPRH	Pure Island	Within	0.04	0.04	0.03	0.01	0.03	0.03	0.02	0.02	0.02	0.01	0.08	0.02	0.04	0.6	0.8	0.03	0.09	0.02	0.1	0.05	0.34	0.44	0.3	0.01	0.02	0.11	0.01	0.03	0.02	0.14	0.03	0.38	0.14	0.31	0.04	0.38	0.18	0.09	0.8	0.22	0.42	0.01	0.02	0.45	0.06	0.03
cg14400118	MMP2	Pure Island	Within	0.1	0.13	0.04	0.1	0.08	0.09	0.08	0.1	0.09	0.05	0.11	0.07	0.07	0.07	0.28	0.86	0.45	0.62	0.7	0.55	0.91	0.92	0.34	0.03	0.09	0.91	0.37	0.27	0.04	0.06	0.37	0.05	0.37	0.04	0.94	0.94	0.91	0.64	0.93	0.69	0.96	0.11	0.89	0.75	0.82	0.91
cg14402472	HLA-F	Pure Island	Within	0.06	0.05	0.03	0.06	0.02	0.03	0.02	0.03	0.02	0.02	0.02	0.04	0.98	0.03	0.09	0.03	0.05	0.04	0.06	0.06	0.07	0.06	0.01	0.36	0.03	0.02	0.03	0.01	0.02	0.01	0.02	0.02	0.02	0.02	0.02	0.03	0.04	0.98	0.02	0.01	0.99	0.03	0.03	0.05	0.09	0.03
cg14415214	PHLDA2	Pure Island	Within	0.04	0.03	0.02	0.04	0.02	0.03	0.03	0.03	0.02	0.02	0.01	0.82	0.01	0.02	0.04	0.05	0.04	0.03	0.04	0.04	0.04	0.03	0.02	0.01	0.01	0.02	0.03	0.01	0.01	0.01	0.02	0.01	0.03	0.01	0.01	0.02	0.01	0.01	0.01	0.02	0.01	0.02	0.01	0.09	0.04	0.02
cg14424579	AGBL5	Pure Island	Within	0.09	0.08	0.05	0.07	0.04	0.04	0.05	0.03	0.03	0.06	0.03	0.04	0.04	0.04	0.09	0.08	0.1	0.06	0.08	0.09	0.08	0.11	0.02	0.03	0.03	0.03	0.02	0.02	0.03	0.04	0.03	0.03	0.02	0.03	0.03	0.05	0.06	0.04	0.03	0.05	0.04	0.03	0.03	0.07	0.07	0.03
cg14426525	SMPDL3A	Pure Island	Within	0.02	0.03	0.04	0.01	0.05	0.06	0.06	0.06	0.08	0.04	0.03	0.03	0.03	0.04	0.04	0.04	0.66	0.04	0.04	0.04	0.04	0.03	0.01	0.01	0.01	0.02	0.02	0.01	0.01	0.01	0.02	0.01	0.01	0.03	0.02	0.02	0.02	0.02	0.01	0.02	0.02	0.03	0.03	0.05	0.04	0.02
cg14430111	TM7SF2	Pure Island	Within	0.05	0.08	0.06	0.04	0.04	0.04	0.03	0.04	0.03	0.06	0.03	0.92	0.04	0.03	0.92	0.05	0.21	0.04	0.07	0.05	0.06	0.05	0.02	0.02	0.03	0.03	0.03	0.02	0.02	0.02	0.02	0.02	0.03	0.02	0.03	0.03	0.06	0.03	0.03	0.03	0.03	0.03	0.02	0.16	0.04	0.03
cg14433673	UCP2	Pure Island	Within	0.04	0.04	0.03	0.02	0.02	0.02	0.02	0.02	0.02	0.02	0.05	0.02	0.02	0.6	0.84	0.02	0.03	0.02	0.03	0.04	0.03	0.03	0.01	0.01	0.01	0.01	0.01	0.04	0.02	0.02	0.01	0.4	0.01	0.05	0.02	0.55	0.02	0.02	0.01	0.02	0.06	0.02	0.02	0.05	0.03	0.02
cg14435807	LOXL1	Pure Island	Within	0.05	0.05	0.04	0.03	0.04	0.03	0.03	0.06	0.03	0.04	0.09	0.04	0.91	0.36	0.07	0.32	0.62	0.77	0.05	0.04	0.06	0.26	0.21	0.36	0.45	0.89	0.78	0.9	0.82	0.02	0.24	0.85	0.97	0.07	0.02	0.5	0.13	0.46	0.44	0.02	0.93	0.05	0.7	0.26	0.05	0.16
cg14436761	RAMP2	Pure Island	Within	0.08	0.07	0.1	0.05	0.06	0.08	0.08	0.07	0.08	0.06	0.07	0.53	0.11	0.38	0.39	0.88	0.89	0.52	0.9	0.84	0.9	0.92	0.94	0.03	0.69	0.93	0.9	0.77	0.27	0.41	0.32	0.89	0.16	0.54	0.82	0.91	0.75	0.04	0.95	0.88	0.92	0.14	0.59	0.87	0.42	0.11
cg14443380	SEMA7A	Pure Island	Within	0.11	0.07	0.04	0.03	0.04	0.18	0.03	0.03	0.03	0.02	0.02	0.05	0.05	0.03	0.1	0.07	0.09	0.06	0.08	0.12	0.95	0.95	0.03	0.02	0.03	0.03	0.02	0.02	0.02	0.02	0.03	0.03	0.02	0.02	0.03	0.16	0.14	0.03	0.85	0.11	0.04	0.03	0.02	0.04	0.05	0.02
cg14449051	SLC6A15	Pure Island	Within	0.05	0.05	0.03	0.11	0.04	0.04	0.03	0.04	0.03	0.14	0.03	0.06	0.95	0.03	0.05	0.77	0.27	0.33	0.49	0.44	0.79	0.9	0.12	0.02	0.02	0.92	0.02	0.02	0.02	0.02	0.02	0.02	0.05	0.92	0.4	0.68	0.37	0.89	0.91	0.93	0.92	0.13	0.9	0.73	0.76	0.16
cg14473924	PDZRN3	Pure Island	Within	0.11	0.17	0.08	0.19	0.12	0.08	0.09	0.1	0.11	0.16	0.11	0.06	0.94	0.09	0.15	0.13	0.72	0.1	0.23	0.47	0.86	0.54	0.76	0.05	0.87	0.06	0.94	0.37	0.05	0.86	0.07	0.35	0.09	0.06	0.08	0.12	0.33	0.07	0.85	0.9	0.92	0.86	0.79	0.73	0.83	0.85
cg14501253	AC135352.6	Pure Island	Within	0.07	0.11	0.06	0.02	0.08	0.06	0.07	0.06	0.05	0.05	0.04	0.07	0.32	0.34	0.68	0.08	0.56	0.07	0.13	0.11	0.1	0.92	0.12	0.03	0.04	0.05	0.05	0.15	0.04	0.03	0.06	0.05	0.09	0.02	0.03	0.03	0.06	0.03	0.04	0.04	0.6	0.72	0.03	0.84	0.09	0.09
cg14538332	SDC2	Pure Island	Within	0.08	0.09	0.07	0.04	0.05	0.05	0.06	0.05	0.05	0.03	0.07	0.07	0.07	0.3	0.13	0.11	0.81	0.08	0.77	0.81	0.8	0.88	0.08	0.07	0.11	0.08	0.04	0.15	0.08	0.06	0.07	0.08	0.06	0.29	0.86	0.9	0.8	0.09	0.86	0.49	0.5	0.08	0.12	0.83	0.1	0.07
cg14539231	EPSTI1	Pure Island	Within	0.08	0.08	0.04	0.02	0.03	0.03	0.03	0.03	0.03	0.03	0.02	0.94	0.39	0.42	0.6	0.92	0.91	0.06	0.45	0.12	0.94	0.95	0.83	0.97	0.96	0.96	0.07	0.3	0.09	0.07	0.11	0.49	0.98	0.97	0.02	0.02	0.1	0.02	0.03	0.04	0.96	0.06	0.02	0.43	0.06	0.03
cg14563260	LPAR1	Pure Island	Within	0.08	0.07	0.08	0.04	0.02	0.12	0.03	0.08	0.03	0.01	0.03	0.8	0.86	0.83	0.86	0.8	0.86	0.62	0.45	0.14	0.25	0.85	0.72	0.39	0.11	0.8	0.03	0.11	0.76	0.52	0.08	0.81	0.83	0.77	0.03	0.12	0.37	0.05	0.04	0.06	0.85	0.05	0.02	0.08	0.43	0.32
cg14580982	ATP6V1C2	Pure Island	Within	0.09	0.1	0.07	0.02	0.03	0.03	0.03	0.04	0.03	0.02	0.1	0.77	0.38	0.17	0.2	0.73	0.28	0.05	0.23	0.1	0.46	0.87	0.33	0.03	0.18	0.38	0.16	0.14	0.03	0.2	0.06	0.25	0.21	0.04	0.05	0.08	0.26	0.09	0.05	0.45	0.61	0.07	0.03	0.39	0.1	0.31
cg14592406	CABP1	Pure Island	Within	0.04	0.03	0.03	0.01	0.01	0.02	0.01	0.02	0.02	0.01	0.01	0.04	0.03	0.51	0.26	0.02	0.04	0.02	0.04	0.05	0.02	0.14	0.03	0.01	0.01	0.01	0.01	0.01	0.01	0.01	0.02	0.02	0.01	0.01	0.02	0.01	0.2	0.01	0.34	0.15	0.04	0.02	0.01	0.05	0.17	0.02
cg14594876	SNTA1	Pure Island	Within	0.09	0.09	0.05	0.24	0.12	0.15	0.11	0.11	0.19	0.24	0.08	0.06	0.07	0.11	0.09	0.06	0.09	0.05	0.2	0.06	0.1	0.22	0.03	0.02	0.03	0.04	0.04	0.05	0.03	0.03	0.03	0.03	0.23	0.03	0.04	0.1	0.12	0.03	0.13	0.48	0.11	0.13	0.08	0.22	0.12	0.04
cg14609458	PRRG4	Pure Island	Within	0.06	0.06	0.04	0.08	0.03	0.05	0.05	0.04	0.03	0.06	0.04	0.22	0.05	0.03	0.3	0.06	0.08	0.04	0.13	0.06	0.06	0.05	0.04	0.03	0.04	0.03	0.04	0.04	0.02	0.04	0.03	0.08	0.09	0.24	0.02	0.03	0.06	0.03	0.03	0.04	0.02	0.04	0.03	0.08	0.06	0.03
cg14611174	SIX6	Pure Island	Within	0.09	0.08	0.06	0.06	0.04	0.04	0.04	0.05	0.04	0.03	0.04	0.2	0.92	0.21	0.16	0.47	0.1	0.07	0.78	0.39	0.83	0.86	0.35	0.14	0.39	0.65	0.63	0.3	0.04	0.42	0.36	0.48	0.83	0.34	0.48	0.21	0.48	0.79	0.71	0.91	0.91	0.26	0.46	0.66	0.37	0.15
cg14613832	CYP26A1	Pure Island	Within	0.07	0.08	0.04	0.08	0.04	0.03	0.03	0.03	0.03	0.03	0.03	0.71	0.03	0.07	0.22	0.05	0.08	0.05	0.08	0.08	0.84	0.86	0.03	0.03	0.03	0.03	0.05	0.24	0.03	0.02	0.03	0.03	0.03	0.03	0.03	0.03	0.09	0.03	0.04	0.35	0.03	0.03	0.85	0.06	0.46	0.03
cg14614901	TMEM215	Pure Island	Within	0.1	0.1	0.06	0.11	0.04	0.05	0.04	0.04	0.06	0.05	0.03	0.11	0.87	0.2	0.19	0.64	0.14	0.07	0.71	0.71	0.8	0.75	0.06	0.03	0.06	0.83	0.03	0.21	0.83	0.03	0.04	0.04	0.04	0.35	0.83	0.56	0.79	0.84	0.73	0.88	0.84	0.06	0.22	0.7	0.65	0.09
cg14617642	H2AFY2	Pure Island	Within	0.02	0.02	0.01	0.03	0.03	0.02	0.03	0.03	0.02	0.01	0.02	0.01	0.98	0.04	0.03	0.04	0.03	0.02	0.05	0.02	0.91	0.02	0.06	0.01	0.01	0.02	0.02	0.01	0.01	0.01	0.04	0.01	0.01	0.01	0.01	0.75	0.44	0.19	0.38	0.11	0.01	0.02	0.02	0.03	0.46	0.02
cg14658362	RBPMS	Pure Island	Within	0.06	0.07	0.07	0.04	0.04	0.03	0.04	0.04	0.04	0.03	0.04	0.78	0.07	0.05	0.09	0.07	0.05	0.05	0.42	0.07	0.36	0.12	0.14	0.03	0.03	0.03	0.05	0.32	0.03	0.25	0.03	0.52	0.03	0.14	0.05	0.45	0.08	0.07	0.37	0.09	0.67	0.11	0.05	0.2	0.07	0.03
cg14662379	KIF1A	Pure Island	Within	0.11	0.09	0.08	0.05	0.08	0.09	0.12	0.09	0.14	0.04	0.08	0.45	0.6	0.3	0.13	0.19	0.15	0.37	0.12	0.51	0.69	0.92	0.43	0.08	0.11	0.31	0.07	0.13	0.08	0.1	0.09	0.42	0.08	0.07	0.77	0.81	0.78	0.17	0.9	0.38	0.26	0.09	0.71	0.89	0.45	0.37
cg14667033	TMEM2	Pure Island	Within	0.1	0.1	0.05	0.06	0.05	0.05	0.06	0.05	0.04	0.08	0.04	0.08	0.39	0.04	0.14	0.08	0.1	0.08	0.09	0.1	0.11	0.12	0.04	0.06	0.04	0.05	0.08	0.11	0.04	0.07	0.05	0.07	0.07	0.05	0.04	0.04	0.05	0.07	0.04	0.06	0.2	0.05	0.04	0.16	0.07	0.05
cg14679587	GLS2	Pure Island	Within	0.11	0.18	0.06	0.18	0.08	0.07	0.05	0.07	0.1	0.18	0.08	0.46	0.72	0.08	0.62	0.35	0.16	0.1	0.15	0.2	0.14	0.76	0.06	0.35	0.79	0.35	0.03	0.07	0.06	0.06	0.05	0.79	0.12	0.07	0.06	0.32	0.15	0.04	0.8	0.72	0.82	0.07	0.08	0.66	0.11	0.08
cg14681055	PITX3	Pure Island	Within	0.14	0.14	0.06	0.04	0.05	0.04	0.04	0.03	0.04	0.03	0.05	0.48	0.05	0.3	0.56	0.1	0.93	0.92	0.15	0.22	0.92	0.95	0.03	0.02	0.02	0.06	0.03	0.02	0.03	0.03	0.05	0.08	0.08	0.03	0.98	0.64	0.09	0.05	0.97	0.95	0.95	0.06	0.85	0.07	0.88	0.03
cg14681767	ARHGEF10	Pure Island	Within	0.13	0.11	0.06	0.09	0.03	0.04	0.02	0.02	0.02	0.02	0.02	0.07	0.92	0.03	0.16	0.07	0.14	0.09	0.17	0.15	0.11	0.14	0.02	0.02	0.03	0.03	0.04	0.02	0.04	0.02	0.03	0.03	0.04	0.03	0.04	0.03	0.82	0.03	0.92	0.04	0.43	0.05	0.03	0.11	0.07	0.02
cg14701410	SLC4A8	Pure Island	Within	0.05	0.05	0.02	0.04	0.03	0.04	0.03	0.03	0.02	0.02	0.02	0.02	0.02	0.02	0.04	0.03	0.07	0.03	0.06	0.06	NA	0.95	0.01	0.01	0.01	0.02	0.01	0.01	0.01	0.01	0.02	0.01	0.01	0.01	0.06	0.08	0.27	0.01	0.02	0.04	0.02	0.02	0.01	0.04	0.17	0.02
cg14717170	SLITRK3	Pure Island	Within	0.19	0.19	0.11	0.2	0.1	0.1	0.09	0.1	0.06	0.13	0.08	0.55	0.9	0.69	0.62	0.45	0.69	0.73	0.58	0.23	0.87	0.83	0.34	0.06	0.08	0.32	0.06	0.14	0.06	0.05	0.06	0.06	0.09	0.06	0.9	0.09	0.8	0.47	0.07	0.91	0.11	0.07	0.9	0.84	0.59	0.84
cg14724364	KCNJ11	No/Distant Island	Within	0.11	0.14	0.11	0.14	0.13	0.1	0.07	0.11	0.08	0.13	0.21	0.1	0.08	0.06	0.13	0.09	0.19	0.11	0.09	0.1	0.1	0.11	0.05	0.04	0.03	0.05	0.08	0.03	0.03	0.04	0.04	0.04	0.11	0.04	0.04	0.05	0.08	0.05	0.05	0.22	0.09	0.1	0.05	0.12	0.11	0.07
cg14785449	ASNS	Pure Island	Within	0.08	0.07	0.05	0.05	0.07	0.06	0.04	0.06	0.06	0.15	0.03	0.04	0.06	0.04	0.06	0.05	0.08	0.18	0.09	0.07	0.09	0.05	0.03	0.03	0.03	0.04	0.05	0.02	0.04	0.02	0.03	0.03	0.06	0.04	0.05	0.03	0.07	0.04	0.05	0.03	0.03	0.05	0.03	0.07	0.09	0.05
cg14795968	ACADL	Pure Island	Within	0.06	0.07	0.05	0.02	0.04	0.04	0.15	0.14	0.07	0.02	0.04	0.05	0.97	0.86	0.59	0.17	0.51	0.93	0.18	0.17	0.95	0.95	0.42	0.01	0.13	0.55	0.05	0.35	0.02	0.02	0.02	0.06	0.39	0.29	0.04	0.48	0.38	0.66	0.48	0.44	0.97	0.03	0.02	0.97	0.08	0.07
cg14809191	FOXQ1	Pure Island	Within	0.12	0.11	0.09	0.07	0.04	0.03	0.04	0.04	0.03	0.05	0.07	0.9	0.94	0.05	0.94	0.09	0.59	0.06	0.09	0.1	0.1	0.87	0.15	0.28	0.38	0.05	0.03	0.06	0.04	0.03	0.05	0.13	0.08	0.04	0.07	0.1	0.08	0.05	0.04	0.11	0.1	0.05	0.03	0.23	0.09	0.1
cg14812492	DGKH	Pure Island	Within	0.06	0.06	0.04	NA	0.11	0.09	0.09	0.1	0.06	0.19	0.04	0.07	0.06	0.05	0.04	0.06	0.07	0.06	0.06	0.08	0.08	0.06	0.08	0.04	0.03	0.03	0.12	0.05	0.05	0.05	0.03	0.03	NA	0.03	0.02	0.06	0.07	0.06	0.11	0.08	0.07	0.11	0.07	0.16	0.08	0.07
cg14831838	CDK5R2	Pure Island	Within	0.04	0.06	0.04	0.07	0.03	0.04	0.03	0.04	0.03	0.03	0.03	0.04	0.12	0.04	0.22	0.04	0.05	0.49	0.05	0.06	0.87	0.88	0.09	0.03	0.03	0.03	0.03	0.04	0.02	0.02	0.11	0.03	0.03	0.03	0.59	0.03	0.86	0.03	0.94	0.05	0.93	0.03	0.62	0.05	0.06	0.03
cg14837411	TEX14	Associated Island	Within	0.16	0.05	0.04	0.1	0.06	0.07	0.06	0.05	0.05	0.14	0.03	0.03	0.03	0.03	0.07	0.12	0.1	0.03	0.09	0.09	0.06	0.05	0.02	0.02	0.02	0.06	0.02	0.02	0.02	0.02	0.02	0.02	0.04	0.01	0.03	0.02	0.13	0.02	0.03	0.06	0.03	0.04	0.07	0.15	0.1	0.03
cg14839257	RPS6KA2	Associated Island	Within	0.03	0.05	0.04	0.18	0.02	0.03	0.02	0.03	0.02	0.02	0.06	0.03	0.47	0.18	0.12	0.05	0.2	0.03	0.12	0.09	0.93	0.92	0.21	0.02	0.15	0.32	0.09	0.25	0.02	0.03	0.06	0.17	0.04	0.04	0.94	0.68	0.87	0.07	0.95	0.92	0.06	0.03	0.7	0.85	0.08	0.12
cg14859074	CLDN1	Pure Island	Within	0.1	0.09	0.04	0.08	0.03	0.03	0.03	0.04	0.03	0.05	0.03	0.04	0.04	0.03	0.7	0.06	0.08	0.05	0.09	0.09	0.07	0.88	0.02	0.06	0.02	0.03	0.03	0.02	0.02	0.02	0.02	0.03	0.03	0.02	0.02	0.03	0.04	0.03	0.03	0.03	0.03	0.02	0.02	0.09	0.06	0.03
cg14889768	RAB32	Pure Island	Within	0.09	0.09	0.05	0.07	0.04	0.04	0.04	0.05	0.05	0.02	0.03	0.05	0.16	0.04	0.08	0.15	0.28	0.07	0.16	0.4	0.83	0.77	0.08	0.26	0.04	0.8	0.05	0.1	0.07	0.07	0.03	0.08	0.79	0.11	0.06	0.09	0.08	0.1	0.45	0.06	0.04	0.06	0.05	0.68	0.11	0.06
cg14900471	GATA4	Pure Island	Within	0.08	0.12	0.08	0.04	0.05	0.05	0.04	0.05	0.05	0.04	0.06	0.05	0.98	0.57	0.13	0.95	0.15	0.92	0.84	0.64	0.94	0.09	0.27	0.04	0.51	0.98	0.05	0.02	0.94	0.85	0.31	0.97	0.05	0.03	0.96	0.51	0.77	0.97	0.82	0.05	0.03	0.06	0.03	0.95	0.88	0.42
cg14914982	CCND2	Pure Island	Within	0.07	0.1	0.09	0.06	0.07	0.08	0.09	0.09	0.08	0.12	0.06	0.07	0.07	0.06	0.14	0.17	0.34	0.11	0.1	0.12	0.08	0.08	0.11	0.04	0.04	0.07	0.06	0.07	0.04	0.04	0.13	0.09	0.08	0.04	0.11	0.08	0.14	0.08	0.06	0.44	0.09	0.09	0.2	0.69	0.12	0.08
cg14950072	LAMA1	Pure Island	Within	0.08	0.08	0.06	0.18	0.05	0.05	0.04	0.05	0.05	0.05	0.05	0.32	0.72	0.13	0.19	0.54	0.19	0.23	0.7	0.67	0.82	0.6	0.26	0.23	0.06	0.38	0.05	0.13	0.09	0.04	0.13	0.08	0.81	0.17	0.5	0.76	0.7	0.89	0.79	0.86	0.84	0.45	0.21	0.55	0.55	0.18
cg14976276	NEU1	Pure Island	Within	0.1	0.07	0.04	0.08	0.03	0.03	0.02	0.03	0.02	0.01	0.04	0.04	0.04	0.04	0.08	0.07	0.06	0.06	0.08	0.08	0.07	0.07	0.02	0.02	0.02	0.03	0.02	0.02	0.02	0.02	0.03	0.03	0.02	0.04	0.04	0.04	0.05	0.08	0.53	0.04	0.71	0.63	0.04	0.06	0.06	0.03
cg14988503	CDKL2	Pure Island	Within	0.04	0.09	0.07	0.04	0.05	0.04	0.04	0.04	0.06	0.05	0.07	0.58	0.57	0.42	0.92	0.09	0.88	0.79	0.08	0.07	0.91	0.75	0.02	0.02	0.02	0.26	0.31	0.03	0.01	0.03	0.03	0.59	0.03	0.07	0.22	0.46	0.05	0.03	0.05	0.04	0.96	0.04	0.03	0.1	0.09	0.31
cg14992253	C1orf91	Pure Island	Within	0.08	0.09	0.06	0.11	0.06	0.07	0.07	0.06	0.06	0.17	0.04	0.04	0.37	0.09	0.15	0.1	0.32	0.07	0.12	0.12	0.09	0.08	0.04	0.1	0.04	0.06	0.05	0.08	0.19	0.03	0.04	0.06	0.11	0.04	0.04	0.23	0.09	0.06	0.23	0.28	0.14	0.07	0.05	0.22	0.09	0.04
cg14998713	ETS1	Pure Island	Within	0.07	0.07	0.04	NA	0.07	0.07	0.06	0.09	0.06	0.15	0.03	0.05	0.13	0.03	0.04	0.83	0.04	0.57	0.05	0.06	0.08	0.12	0.02	0.02	0.03	0.88	0.1	0.02	0.07	0.03	0.03	0.03	NA	0.06	0.06	0.22	0.05	0.96	0.83	0.02	0.04	0.03	0.04	0.3	0.06	0.03
cg15001381	AXIN1	Pure Island	Within	0.11	0.11	0.08	0.07	0.04	0.05	0.04	0.04	0.04	0.06	0.04	0.88	0.93	0.05	0.19	0.09	0.22	0.07	0.13	0.13	0.13	0.09	0.31	0.03	0.16	0.03	0.1	0.04	0.04	0.03	0.04	0.04	0.06	0.03	0.03	0.03	0.08	0.05	0.04	0.06	0.52	0.06	0.05	0.15	0.1	0.24
cg15002214	NOG	Pure Island	Within	0.08	0.06	0.04	0.13	0.03	0.04	0.04	0.04	0.03	0.09	0.03	0.04	0.04	0.03	0.07	0.05	0.1	0.04	0.11	0.08	0.85	0.78	0.02	0.02	0.02	0.03	0.04	0.02	0.02	0.02	0.03	0.02	0.06	0.02	0.41	0.32	0.22	0.07	0.07	0.05	0.03	0.05	0.04	0.08	0.05	0.04
cg15014549	SLC47A1	Pure Island	Within	0.17	0.11	0.07	0.06	0.07	0.06	0.07	0.06	0.05	0.04	0.08	0.64	0.06	0.51	0.45	0.13	0.43	0.1	0.47	0.23	0.86	0.89	0.36	0.05	0.05	0.12	0.03	0.05	0.1	0.04	0.07	0.08	0.29	0.15	0.85	0.57	0.77	0.69	0.85	0.21	0.05	0.05	0.14	0.78	0.1	0.08
cg15016234	TRIM62	Pure Island	Within	0.06	0.06	0.05	0.04	0.04	0.05	0.04	0.04	0.04	0.03	0.05	0.04	0.05	0.04	0.07	0.05	0.07	0.05	0.08	0.07	0.49	0.15	0.04	0.04	0.04	0.04	0.04	0.03	0.04	0.03	0.04	0.04	0.03	0.03	0.04	0.05	0.05	0.04	0.04	0.08	0.05	0.04	0.09	0.08	0.09	0.04
cg15034135	ADAMTS19	Pure Island	Within	0.08	0.05	0.03	0.13	0.03	0.03	0.02	0.03	0.03	0.03	0.03	0.04	0.04	0.07	0.1	0.05	0.2	0.31	0.09	0.06	0.82	NA	0.1	0.02	0.02	0.02	0.04	0.07	0.01	0.01	0.02	0.13	0.04	0.03	0.37	0.03	0.38	0.3	0.03	0.86	0.56	0.03	0.07	0.79	0.18	0.17
cg15042080	TMEM74	Pure Island	Within	0.06	0.06	0.05	0.17	0.06	0.06	0.06	0.05	0.06	0.08	0.03	0.05	0.04	0.03	0.11	0.38	0.89	0.04	0.6	0.58	0.95	0.93	0.02	0.02	0.03	0.03	0.04	0.03	0.02	0.02	0.03	0.02	0.05	0.03	0.97	0.84	0.89	0.05	0.93	0.92	0.94	0.07	0.94	0.88	0.58	0.04
cg15075170	C9orf30	Pure Island	Within	0.02	0.04	0.04	0.03	0.05	0.06	0.05	0.06	0.06	0.02	0.15	0.03	0.03	0.13	0.09	0.05	0.05	0.08	0.4	0.04	0.94	0.95	0.03	0.02	0.03	0.05	0.02	0.02	0.02	0.02	0.04	0.03	0.01	0.02	0.97	0.12	0.82	0.04	0.97	0.15	0.04	0.04	0.47	0.06	0.09	0.04
cg15105660	CLDN1	Pure Island	Within	0.11	0.14	0.08	0.06	0.23	0.12	0.07	0.08	0.09	0.06	0.04	0.05	0.64	0.12	0.94	0.37	0.09	0.06	0.17	0.1	0.21	0.92	0.02	0.05	0.03	0.04	0.02	0.18	0.04	0.02	0.03	0.34	0.04	0.04	0.07	0.05	0.04	0.04	0.03	0.04	0.04	0.04	0.03	0.85	0.06	0.04
cg15105703	DUOXA1	Pure Island	Within	0.1	0.07	0.05	0.06	0.1	0.1	0.12	0.12	0.11	0.03	0.23	0.69	0.75	0.35	0.73	0.9	0.85	0.86	0.87	0.16	0.89	0.92	0.91	0.16	0.76	0.9	0.95	0.92	0.15	0.22	0.12	0.67	0.95	0.91	0.13	0.86	0.9	0.95	0.9	0.66	0.97	0.67	0.74	0.35	0.14	0.34
cg15107670	WIT1	Pure Island	Within	0.06	0.09	0.04	0.05	0.03	0.04	0.03	0.03	0.18	0.02	0.04	0.05	0.03	0.21	0.13	0.91	0.07	0.57	0.12	0.07	0.85	0.91	0.41	0.26	0.03	0.94	0.02	0.37	0.02	0.03	0.04	0.34	0.47	0.05	0.96	0.5	0.76	0.05	0.87	0.92	0.96	0.03	0.62	0.79	0.74	0.53
cg15119375	C16orf67	Pure Island	Within	0.13	0.16	0.07	0.05	0.04	0.03	0.03	0.03	0.03	0.08	0.02	0.08	0.05	0.04	0.37	0.07	0.11	0.09	0.18	0.19	0.16	0.14	0.02	0.03	0.03	0.03	0.02	0.04	0.02	0.03	0.03	0.02	0.05	0.03	0.04	0.03	0.06	0.04	0.03	0.04	0.36	0.04	0.03	0.07	0.06	0.05
cg15128898	SPEF2	Pure Island	Within	0.06	0.05	0.04	0.06	0.03	0.03	0.03	0.03	0.03	0.04	0.06	0.05	0.03	0.04	0.06	0.06	0.25	0.03	0.41	0.31	0.04	0.06	0.15	0.02	0.02	0.03	0.03	0.04	0.02	0.05	0.02	0.34	0.03	0.04	0.03	0.06	0.04	0.07	0.38	0.04	0.59	0.06	0.02	0.08	0.04	0.02
cg15134628	MAPK12	Pure Island	Within	0.09	0.08	0.06	0.03	0.05	0.04	0.05	0.06	0.05	0.02	0.1	0.05	0.05	0.04	0.06	0.52	0.13	0.06	0.08	0.09	0.06	0.06	0.04	0.03	0.03	0.04	0.02	0.04	0.07	0.03	0.04	0.03	0.02	0.04	0.05	0.03	0.06	0.04	0.04	0.05	0.03	0.04	0.03	0.12	0.05	0.03
cg15134649	MT1E	Pure Island	Within	0.11	0.11	0.05	0.03	0.05	0.04	0.03	0.03	0.04	0.04	0.03	0.07	0.78	0.04	0.67	0.85	0.52	0.82	0.11	0.34	0.45	0.1	0.42	0.87	0.93	0.92	0.03	0.02	0.16	0.85	0.47	0.92	0.92	0.84	0.7	0.03	0.04	0.75	0.03	0.17	0.03	0.06	0.04	0.08	0.07	0.88
cg15146720	AC006017.2-1	Pure Island	Within	0.12	0.12	0.15	0.07	0.07	0.08	0.08	0.09	0.07	0.06	0.06	0.15	0.08	0.08	0.11	0.09	0.11	0.13	0.12	0.14	0.15	0.17	0.05	0.06	0.05	0.05	0.05	0.05	0.05	0.05	0.05	0.06	0.04	0.05	0.07	0.07	0.24	0.08	0.05	0.12	0.07	0.08	0.05	0.16	0.09	0.06
cg15156078	RASGRF1	Pure Island	Within	0.09	0.08	0.12	0.04	0.05	0.08	0.05	0.14	0.04	0.03	0.15	0.24	0.92	0.21	0.31	0.35	0.11	0.07	0.9	0.89	0.9	0.91	0.33	0.38	0.1	0.04	0.07	0.33	0.14	0.14	0.15	0.44	0.89	0.33	0.92	0.9	0.86	0.91	0.87	0.66	0.93	0.17	0.78	0.84	0.85	0.49
cg15185001	LSR	Pure Island	Within	0.14	0.15	0.08	0.07	0.07	0.05	0.04	0.05	0.05	0.06	0.04	0.06	0.98	0.04	0.19	0.09	0.1	0.1	0.11	0.18	0.14	0.15	0.06	0.03	0.37	0.04	0.04	0.03	0.04	0.04	0.04	0.64	0.04	0.05	0.04	0.05	0.06	0.05	0.04	0.05	0.96	0.04	0.03	0.05	0.13	0.37
cg15191648	SALL3	Pure Island	Within	0.18	0.14	0.06	0.02	0.04	0.02	0.03	0.04	0.03	0.01	0.08	0.96	0.96	0.97	0.84	0.95	0.89	0.69	0.89	0.96	0.97	0.98	0.47	0.6	0.98	0.97	0.03	0.54	0.02	0.97	0.98	0.94	0.99	0.86	0.98	0.99	0.9	0.98	0.99	0.97	0.98	0.93	0.96	0.93	0.89	0.93
cg15201635	SMPD3	Pure Island	Within	0.05	0.05	0.03	0.02	0.03	0.03	0.04	0.08	0.03	0.02	0.03	0.03	0.02	0.49	0.48	0.03	0.66	0.03	0.05	0.06	0.19	0.9	0.02	0.02	0.02	0.02	0.01	0.02	0.01	0.02	0.02	0.02	0.01	0.02	0.02	0.02	0.03	0.02	0.92	0.03	0.42	0.02	0.02	0.32	0.04	0.01
cg15201877	PTGER3	Pure Island	Within	0.13	0.11	0.1	0.02	0.07	0.09	0.08	0.09	0.06	0.09	0.2	0.88	0.93	0.56	0.83	0.11	0.68	0.04	0.91	0.94	0.93	0.94	0.55	0.03	0.61	0.25	0.31	0.64	0.07	0.42	0.13	0.9	0.31	0.46	0.93	0.96	0.69	0.94	0.96	0.9	0.93	0.36	0.89	0.83	0.77	0.48
cg15210596	SCCPDH	Pure Island	Within	0.03	0.04	0.03	0.08	0.04	0.04	0.05	0.05	0.05	0.04	0.04	0.03	0.03	0.08	0.03	0.19	0.04	0.03	0.04	0.03	0.04	0.04	0.01	0.02	0.02	0.65	0.04	0.02	0.01	0.02	0.03	0.02	0.03	0.02	0.02	0.03	0.05	0.02	0.03	0.03	0.03	0.03	0.03	0.93	0.06	0.03
cg15211655	OSBPL1A	Pure Island	Within	0.05	0.07	0.04	0.01	0.03	0.04	0.03	0.04	0.03	0.04	0.03	0.94	0.03	0.03	0.48	0.04	0.06	0.03	0.06	0.04	0.04	0.04	0.02	0.02	0.02	0.02	0.04	0.03	0.03	0.02	0.03	0.03	0.03	0.03	0.04	0.03	0.05	0.04	0.03	0.06	0.02	0.04	0.06	0.04	0.08	0.04
cg15230273	EFNA5	Pure Island	Within	0.15	0.2	0.13	0.07	0.06	0.07	0.07	0.07	0.06	0.04	0.06	0.08	0.09	0.08	0.24	0.12	0.22	0.13	0.24	0.27	0.21	0.78	0.06	0.05	0.06	0.06	0.09	0.05	0.05	0.07	0.06	0.06	0.04	0.06	0.09	0.08	0.12	0.14	0.06	0.09	0.53	0.07	0.06	0.16	0.09	0.07
cg15239123	SMOC1	Pure Island	Within	0.16	0.14	0.07	0.08	0.03	0.04	0.04	0.04	0.03	0.03	0.04	0.06	0.28	0.04	0.85	0.86	0.12	0.74	0.83	0.76	0.78	0.83	0.41	0.02	0.34	0.93	0.21	0.3	0.05	0.02	0.26	0.02	0.02	0.04	0.54	0.93	0.84	0.93	0.92	0.45	0.93	0.04	0.3	0.87	0.8	0.03
cg15242570	CTSL1	Pure Island	Within	0.2	0.16	0.23	0.21	0.06	0.08	0.1	0.09	0.09	0.06	0.11	0.17	0.52	0.16	0.27	0.16	0.17	0.17	0.15	0.21	0.82	0.28	0.05	0.06	0.04	0.05	0.07	0.04	0.06	0.05	0.06	0.07	0.12	0.26	0.7	0.21	0.14	0.26	0.16	0.14	0.23	0.26	0.08	0.1	0.09	0.06
cg15247144	PYCARD	Pure Island	Within	0.12	0.12	0.05	0.02	0.04	0.03	0.03	0.03	0.03	0.02	0.02	0.91	0.04	0.13	0.61	0.05	0.09	0.56	0.12	0.16	0.9	0.9	0.95	0.04	0.54	0.08	0.73	0.08	0.03	0.57	0.03	0.95	0.96	0.94	0.03	0.75	0.05	0.95	0.94	0.07	0.96	0.03	0.02	0.82	0.06	0.94
cg15270950	TGFBR2	Pure Island	Within	0.09	0.08	0.06	0.03	0.05	0.05	0.06	0.05	0.05	0.03	0.05	0.05	0.05	0.04	0.07	0.06	0.08	0.12	0.09	0.09	0.08	0.09	0.05	0.04	0.06	0.07	0.04	0.04	0.04	0.05	0.05	0.05	0.45	0.11	0.04	0.04	0.08	0.04	0.03	0.05	0.58	0.05	0.04	0.09	0.08	0.05
cg15299721	NHEDC2	Pure Island	Within	0.04	0.06	0.04	0.02	0.02	0.02	0.01	0.03	0.02	0.02	0.02	0.03	0.03	0.02	0.05	0.04	0.05	0.03	0.05	0.05	0.28	0.04	0.13	0.02	0.27	0.02	0.02	0.02	0.02	0.02	0.02	0.02	0.01	0.03	0.02	0.02	0.06	0.03	0.02	0.03	0.03	0.03	0.02	0.1	0.76	0.02
cg15301700	SCRT1	Pure Island	Within	0.07	0.07	0.05	0.07	0.06	0.08	0.07	0.08	0.08	0.04	0.05	0.04	0.04	0.06	0.07	0.07	0.09	0.06	0.12	0.05	0.05	0.05	0.04	0.04	0.03	0.05	0.03	0.03	0.03	0.03	0.06	0.04	0.03	0.03	0.04	0.04	0.09	0.04	0.03	0.05	0.06	0.04	0.04	0.2	0.37	0.06
cg15307169	DOK7	Pure Island	Within	0.13	0.07	0.06	0.03	0.03	0.04	0.04	0.03	0.04	0.03	0.09	0.82	0.15	0.04	0.52	0.05	0.1	0.04	0.08	0.06	0.04	0.84	0.26	0.87	0.11	0.03	0.46	0.07	0.03	0.03	0.04	0.1	0.9	0.11	0.05	0.03	0.07	0.06	0.04	0.05	0.9	0.08	0.05	0.1	0.1	0.05
cg15309006	AC130454.2	Associated Island	Within	0.1	0.09	0.06	0.01	0.03	0.02	0.07	0.03	0.05	0.01	0.18	0.06	0.91	0.49	0.32	0.61	0.73	0.11	0.54	0.28	0.94	0.94	0.61	0.04	0.08	0.13	0.64	0.55	0.09	0.14	0.08	0.92	0.74	0.12	0.47	0.52	0.43	0.98	0.98	0.58	0.97	0.14	0.46	0.95	0.75	0.36
cg15319451	TMEM51	Pure Island	Within	0.12	0.1	0.09	0.04	0.05	0.07	0.06	0.05	0.05	0.04	0.05	0.08	0.87	0.07	0.2	0.11	0.11	0.09	0.15	0.15	0.15	0.15	0.05	0.09	0.06	0.06	0.07	0.05	0.11	0.06	0.11	0.1	0.12	0.07	0.06	0.07	0.12	0.08	0.07	0.07	0.07	0.07	0.06	0.1	0.11	0.06
cg15319457	HES6	Pure Island	Within	0.06	0.06	0.06	0.03	0.03	0.03	0.02	0.03	0.04	0.02	0.04	0.71	0.04	0.1	0.25	0.06	0.05	0.04	0.26	0.06	0.05	0.05	0.02	0.02	0.02	0.03	0.03	0.03	0.01	0.09	0.02	0.95	0.02	0.02	0.02	0.02	0.04	0.02	0.27	0.94	0.03	0.04	0.06	0.04	0.35	0.04
cg15331039	SH3BGRL2	Pure Island	Within	0.17	0.09	0.05	0.03	0.04	0.03	0.02	0.02	0.02	0.03	0.02	0.05	0.04	0.03	0.13	0.06	0.1	0.06	0.08	0.12	0.1	0.1	0.02	0.02	0.03	0.02	0.03	0.02	0.02	0.02	0.02	0.02	0.02	0.04	0.02	0.02	0.05	0.02	0.02	0.02	0.05	0.03	0.02	0.05	0.07	0.02
cg15337897	FGF3	Pure Island	Within	0.2	0.1	0.06	0.05	0.11	0.05	0.09	0.09	0.03	0.02	0.02	0.97	0.98	0.46	0.27	0.96	0.66	0.31	0.1	0.14	0.95	0.96	0.34	0.02	0.48	0.98	0.98	0.52	0.01	0.83	0.1	0.9	0.02	0.02	0.98	0.97	0.9	0.97	0.97	0.9	0.98	0.32	0.98	0.92	0.89	0.88
cg15341340	DNASE2	Pure Island	Within	0.11	0.14	0.09	0.09	0.05	0.05	0.04	0.05	0.05	0.05	0.04	0.08	0.06	0.06	0.51	0.08	0.1	0.09	0.12	0.15	0.12	0.13	0.04	0.04	0.05	0.05	0.05	0.03	0.05	0.04	0.05	0.13	0.03	0.04	0.04	0.05	0.06	0.92	0.04	0.05	0.05	0.05	0.05	0.1	0.07	0.05
cg15348640	MYD88	Pure Island	Within	0.1	0.12	0.04	0.05	0.03	0.03	0.04	0.04	0.03	0.06	0.05	0.35	0.03	0.03	0.91	0.04	0.07	0.05	0.14	0.1	0.07	0.35	0.25	0.01	0.33	0.02	0.03	0.03	0.03	0.02	0.02	0.85	0.05	0.86	0.03	0.02	0.05	0.03	0.02	0.03	0.32	0.04	0.03	0.08	0.07	0.03
cg15365950	KLHDC1	Pure Island	Within	0.05	0.05	0.04	0.02	0.04	0.03	0.03	0.03	0.03	0.02	0.04	0.35	0.04	0.19	0.27	0.06	0.08	0.04	0.11	0.06	0.05	0.09	0.03	0.03	0.03	0.05	0.02	0.02	0.04	0.03	0.04	0.07	0.02	0.43	0.02	0.02	0.07	0.04	0.03	0.05	0.04	0.03	0.03	0.23	0.07	0.03
cg15368822	TMEM63A	Pure Island	Within	0.11	0.11	0.07	0.04	0.06	0.06	0.06	0.06	0.05	0.03	0.05	0.08	0.07	0.07	0.13	0.09	0.12	0.08	0.11	0.11	0.15	0.12	0.06	0.82	0.06	0.06	0.04	0.06	0.06	0.06	0.06	0.06	0.85	0.06	0.06	0.06	0.08	0.06	0.06	0.07	0.05	0.06	0.05	0.08	0.1	0.06
cg15375239	SPINT2	Pure Island	Within	0.08	0.08	0.06	0.01	0.02	0.01	0.01	0.02	0.01	0.01	0.01	0.98	0.02	0.02	0.93	0.04	0.05	0.05	0.06	0.06	0.07	0.96	0.55	0.01	0.01	0.02	0.02	0.02	0.01	0.03	0.01	0.98	0.01	0.6	0.01	0.01	0.03	0.01	0.01	0.02	0.5	0.02	0.02	0.05	0.06	0.47
cg15379633	RAB36	Pure Island	Within	0.1	0.1	0.06	0.02	0.03	0.03	0.03	0.03	0.03	0.03	0.04	0.65	0.97	0.03	0.17	0.05	0.91	0.13	0.07	0.1	0.08	0.08	0.02	0.02	0.02	0.02	0.03	0.02	0.02	0.02	0.03	0.02	0.01	0.59	0.16	0.63	0.06	0.98	0.02	0.03	0.03	0.04	0.03	0.1	0.1	0.97
cg15381769	PTPRK	Pure Island	Within	0.06	0.06	0.03	0.02	0.04	0.03	0.03	0.03	0.03	0.02	0.03	0.03	0.04	0.03	0.05	0.05	0.05	0.04	0.07	0.06	0.06	0.05	0.03	0.02	0.03	0.02	0.02	0.02	0.02	0.02	0.03	0.03	0.02	0.03	0.04	0.03	0.04	0.03	0.03	0.04	0.23	0.04	0.03	0.09	0.07	0.03
cg15385623	THRB	Pure Island	Within	0.13	0.13	0.2	0.05	0.09	0.09	0.1	0.09	0.08	0.05	0.16	0.18	0.87	0.15	0.36	0.13	0.1	0.12	0.15	0.15	0.09	0.85	0.4	0.06	0.07	0.08	0.1	0.1	0.07	0.08	0.08	0.08	0.07	0.1	0.13	0.15	0.16	0.14	0.88	0.19	0.83	0.18	0.16	0.11	0.1	0.09
cg15410903	GSTO2	Pure Island	Within	0.08	0.17	0.13	0.04	0.03	0.02	0.02	0.03	0.03	0.03	0.03	0.68	0.04	0.03	0.1	0.05	0.06	0.04	0.06	0.09	0.06	0.06	0.01	0.02	0.02	0.02	0.03	0.02	0.02	0.01	0.02	0.02	0.01	0.03	0.03	0.04	0.04	0.05	0.03	0.05	0.41	0.03	0.95	0.03	0.08	0.29
cg15413566	ICA1	Pure Island	Within	0.12	0.16	0.21	0.09	0.11	0.13	0.13	0.15	0.12	0.1	0.09	0.62	0.17	0.15	0.2	0.12	0.18	0.14	0.15	0.16	0.12	0.16	0.09	0.08	0.11	0.08	0.12	0.07	0.08	0.08	0.07	0.07	0.08	0.1	0.13	0.13	0.14	0.09	0.1	0.13	0.35	0.14	0.12	0.21	0.13	0.09
cg15414833	RUNDC3B	Pure Island	Within	0.05	0.05	0.03	0.08	0.03	0.04	0.03	0.03	0.04	0.03	0.02	0.98	0.02	0.27	0.05	0.05	0.11	0.03	0.06	0.05	0.98	0.95	0.01	0.01	0.02	0.02	0.04	0.02	0.02	0.02	0.02	0.02	0.03	0.03	0.03	0.02	0.05	0.02	0.02	0.98	0.55	0.04	0.02	0.02	0.06	0.03
cg15416233	PAX2	Pure Island	Within	0.04	0.04	0.02	0.03	0.02	0.02	0.02	0.02	0.02	0.01	0.01	0.03	0.03	0.07	0.05	0.11	0.06	0.02	0.04	0.04	0.81	0.22	0.02	0.02	0.02	0.02	0.02	0.02	0.02	0.02	0.03	0.02	0.03	0.02	0.02	0.21	0.08	0.02	0.03	0.02	0.03	0.02	0.02	0.05	0.26	0.02
cg15425280	GRIA2	Pure Island	Within	0.12	0.16	0.15	0.12	0.06	0.06	0.06	0.09	0.07	0.11	0.2	0.79	0.85	0.43	0.38	0.09	0.11	0.07	0.74	0.73	0.79	0.8	0.26	0.04	0.1	0.07	0.07	0.11	0.05	0.29	0.15	0.44	0.06	0.86	0.83	0.85	0.77	0.8	0.74	0.86	0.86	0.41	0.81	0.68	0.82	0.38
cg15426734	ACD	Pure Island	Within	0.12	0.07	0.06	0.03	0.06	0.05	0.08	0.06	0.05	0.01	0.21	0.84	0.46	0.66	0.82	0.86	0.49	0.27	0.89	0.58	0.31	0.88	0.75	0.93	0.92	0.91	0.92	0.92	0.48	0.76	0.26	0.89	0.04	0.69	0.49	0.95	0.18	0.9	0.93	0.77	0.93	0.57	0.13	0.88	0.75	0.86
cg15427448	BACE1	Pure Island	Within	0.06	0.06	0.06	0.02	0.04	0.03	0.03	0.06	0.03	0.02	0.03	0.04	0.04	0.03	0.07	0.05	0.07	0.05	0.07	0.07	0.06	0.06	0.02	0.02	0.02	0.02	0.01	0.02	0.02	0.02	0.02	0.02	0.01	0.02	0.03	0.02	0.05	0.1	0.03	0.03	0.03	0.04	0.03	0.07	0.05	0.02
cg15433631	C5orf38	Pure Island	Within	0.14	0.11	0.06	0.02	0.04	0.03	0.03	0.03	0.03	0.02	0.02	0.96	0.97	0.03	0.15	0.06	0.08	0.08	0.53	0.61	0.52	0.41	0.89	0.91	0.51	0.03	0.03	0.41	0.02	0.02	0.02	0.02	0.02	0.03	0.02	0.98	0.41	0.02	0.98	0.97	0.98	0.97	0.97	0.92	0.22	0.95
cg15439862	DSC3	Pure Island	Within	0.06	0.11	0.11	0.04	0.04	0.07	0.04	0.04	0.04	0.02	0.04	0.88	0.91	0.04	0.86	0.87	0.13	0.86	0.39	0.22	0.89	0.85	0.89	0.52	0.27	0.9	0.03	0.46	0.03	0.43	0.1	0.89	0.58	0.55	0.91	0.44	0.48	0.05	0.89	0.88	0.89	0.05	0.12	0.38	0.81	0.86
cg15442702	FGFR4	Pure Island	Within	0.09	0.1	0.12	0.06	0.1	0.08	0.1	0.09	0.06	0.04	0.21	0.08	0.1	0.15	0.49	0.1	0.12	0.09	0.16	0.11	0.09	0.13	0.12	0.1	0.09	0.1	0.07	0.12	0.1	0.24	0.1	0.15	0.06	0.14	0.11	0.14	0.13	0.13	0.15	0.09	0.54	0.13	0.12	0.12	0.28	0.08
cg15444978	MARK3	Pure Island	Within	0.07	0.1	0.05	0.03	0.04	0.05	0.03	0.04	0.04	0.03	0.06	0.11	0.08	0.34	0.15	0.11	0.1	0.04	0.15	0.16	0.41	0.18	0.02	0.11	0.1	0.05	0.04	0.12	0.03	0.05	0.03	0.05	0.04	0.04	0.03	0.59	0.22	0.07	0.8	0.93	0.21	0.06	0.11	0.66	0.16	0.04
cg15447479	SMO	Pure Island	Within	0.13	0.09	0.05	0.22	0.06	0.05	0.08	0.05	0.04	0.05	0.07	0.06	0.05	0.23	0.1	0.91	0.13	0.09	0.4	0.11	0.91	0.96	0.12	0.02	0.02	0.95	0.03	0.02	0.02	0.03	0.03	0.3	0.26	0.02	0.68	0.06	0.68	0.03	0.94	0.66	0.04	0.05	0.72	0.19	0.86	0.04
cg15456206	ZNF580	Pure Island	Within	0.21	0.04	0.05	0.03	0.03	0.03	0.04	0.03	0.03	0.02	0.05	0.09	0.72	0.1	0.18	0.06	0.08	0.08	0.07	0.18	0.06	0.04	0.08	0.02	0.1	0.06	0.02	0.08	0.27	0.05	0.04	0.12	0.02	0.04	0.04	0.62	0.08	0.03	0.68	0.32	0.21	0.05	0.41	0.21	0.84	0.03
cg15457899	SCN3B	Pure Island	Within	0.03	0.05	0.07	0.08	0.05	0.04	0.03	0.04	0.04	0.02	0.03	0.03	0.98	0.08	0.73	0.96	0.87	0.85	0.46	0.38	0.94	0.96	0.22	0.01	0.09	0.98	0.02	0.44	0.04	0.05	0.09	0.06	0.02	0.02	0.02	0.48	0.63	0.53	0.98	0.98	0.97	0.04	0.38	0.41	0.89	0.03
cg15462232	FOXD3	Pure Island	Within	0.06	0.05	0.06	0.18	0.09	0.07	0.11	0.08	0.09	0.06	0.04	0.62	0.51	0.19	0.13	0.08	0.06	0.08	0.12	0.11	0.83	0.78	0.03	0.03	0.03	0.06	0.06	0.02	0.04	0.04	0.04	0.04	0.18	0.04	0.45	0.07	0.16	0.13	0.62	0.06	0.7	0.06	0.08	0.31	0.1	0.05
cg15488251	MYH11	Pure Island	Within	0.06	0.07	0.02	0.1	0.04	0.04	0.04	0.05	0.03	0.05	0.02	0.04	0.02	0.03	0.84	0.31	0.1	0.03	0.91	0.17	0.93	NA	0.06	0.06	0.11	0.88	0.05	0.46	0.01	0.02	0.03	0.78	0.06	0.01	0.94	0.56	0.61	0.1	0.96	0.56	0.07	0.03	0.8	0.47	0.3	0.05
cg15507817	WNT7B	Pure Island	Within	0.02	0.03	0.02	0.02	0.04	0.03	0.03	0.03	0.04	0.02	0.02	0.86	0.03	0.02	0.02	0.03	0.02	0.02	0.05	0.02	0.04	0.9	0.02	0.01	0.01	0.02	0.02	0.01	0.01	0.01	0.03	0.02	0.02	0.01	0.01	0.01	0.03	0.03	0.01	0.02	0.25	0.02	0.01	0.03	0.03	0.03
cg15520279	AC009336.13	Pure Island	Within	0.05	0.04	0.03	0.02	0.03	0.05	0.03	0.05	0.02	0.01	0.09	0.02	0.02	0.96	0.07	0.03	0.91	0.94	0.06	0.03	0.04	0.26	0.07	0.97	0.01	0.02	0.88	0.01	0.99	0.01	0.98	0.01	0.01	0.01	0.02	0.03	0.05	0.02	0.01	0.99	0.98	0.98	0.98	0.02	0.95	0.01
cg15553522	TMEM132A	Pure Island	Within	0.17	0.1	0.07	0.13	0.05	0.05	0.04	0.04	0.04	0.03	0.04	0.23	0.09	0.24	0.15	0.06	0.08	0.07	0.13	0.09	0.25	0.08	0.03	0.03	0.03	0.03	0.11	0.03	0.04	0.05	0.04	0.12	0.04	0.03	0.1	0.05	0.21	0.05	0.22	0.05	0.05	0.06	0.08	0.11	0.32	0.05
cg15568167	SAMD10	Pure Island	Within	0.07	0.07	0.06	0.06	0.03	0.03	0.03	0.03	0.02	0.03	0.04	0.04	0.03	0.02	0.25	0.05	0.07	0.05	0.08	0.09	0.07	0.07	0.03	0.02	0.97	0.03	0.03	0.24	0.04	0.02	0.02	0.06	0.03	0.26	0.06	0.03	0.05	0.03	0.02	0.07	0.49	0.06	0.02	0.1	0.04	0.06
cg15576195	HTATIP2	Pure Island	Within	0.14	0.11	0.05	0.05	0.08	0.06	0.06	0.07	0.05	0.06	0.07	0.07	0.41	0.05	0.87	0.08	0.08	0.08	0.13	0.12	0.12	0.1	0.14	0.05	0.04	0.05	0.04	0.04	0.07	0.04	0.05	0.06	0.95	0.52	0.04	0.04	0.1	0.04	0.04	0.05	0.04	0.06	0.05	0.09	0.07	0.05
cg15591678	ZNF365	Pure Island	Within	0.09	0.09	0.04	0.02	0.03	0.03	0.02	0.02	0.03	0.01	0.03	0.05	0.05	0.03	0.1	0.05	0.09	0.06	0.1	0.12	0.87	0.91	0.2	0.02	0.02	0.02	0.02	0.01	0.02	0.02	0.02	0.03	0.02	0.02	0.96	0.04	0.94	0.55	0.97	0.07	0.71	0.02	0.02	0.05	0.44	0.02
cg15604467	POU4F1	Pure Island	Within	0.13	0.15	0.11	0.08	0.07	0.04	0.03	0.06	0.2	0.08	0.05	0.89	0.05	0.25	0.62	0.85	0.11	0.93	0.65	0.2	0.87	0.94	0.07	0.03	0.05	0.93	0.05	0.02	0.02	0.18	0.03	0.42	0.04	0.03	0.94	0.42	0.87	0.04	0.55	0.9	0.95	0.29	0.84	0.86	0.76	0.08
cg15613048	KIF17	Pure Island	Within	0.05	0.04	0.03	0.01	0.03	0.02	0.02	0.02	0.04	0.01	0.1	0.98	0.58	0.24	0.88	0.53	0.38	0.05	0.93	0.54	0.95	0.96	0.02	0.65	0.59	0.98	0.14	0.16	0.02	0.01	0.04	0.04	0.03	0.01	0.98	0.77	0.95	0.37	0.98	0.98	0.98	0.05	0.6	0.94	0.97	0.02
cg15628498	ONECUT1	Pure Island	Within	0.04	0.03	0.04	0.03	0.03	0.03	0.02	0.02	0.02	0.02	0.02	0.23	0.08	0.04	0.13	0.22	0.36	0.03	0.76	0.2	0.68	0.89	0.04	0.02	0.03	0.25	0.02	0.04	0.02	0.02	0.03	0.31	0.02	0.05	0.94	0.05	0.88	0.24	0.71	0.09	0.49	0.03	0.03	0.88	0.13	0.04
cg15639045	SLC16A11	Pure Island	Within	0.08	0.08	0.05	0.02	0.03	0.04	0.03	0.04	0.04	0.01	0.1	0.26	0.08	0.36	0.37	0.66	0.55	0.06	0.45	0.1	0.88	0.91	0.44	0.03	0.44	0.89	0.51	0.64	0.05	0.03	0.05	0.44	0.03	0.08	0.05	0.45	0.1	0.94	0.84	0.91	0.93	0.1	0.76	0.86	0.13	0.1
cg15640375	AC006273.1	Pure Island	Within	0.11	0.08	0.09	0.06	0.07	0.1	0.11	0.12	0.1	0.04	0.13	0.87	0.08	0.27	0.44	0.15	0.4	0.09	0.21	0.12	0.9	0.92	0.28	0.06	0.06	0.63	0.05	0.08	0.11	0.15	0.18	0.24	0.05	0.13	0.93	0.95	0.89	0.33	0.92	0.91	0.06	0.07	0.89	0.57	0.71	0.05
cg15646782	FAM55C	Pure Island	Within	0.04	0.04	0.03	0.08	0.04	0.04	0.03	0.03	0.03	0.04	0.04	0.02	0.03	0.03	0.06	0.04	0.05	0.04	0.06	0.03	0.04	0.05	0.01	0.02	0.02	0.02	0.03	0.03	0.02	0.02	0.02	0.01	0.04	0.02	0.02	0.04	0.04	0.03	0.03	0.02	0.03	0.03	0.02	0.05	0.07	0.03
cg15649452	ATOH8	Pure Island	Within	0.05	0.06	0.05	0.03	0.05	0.06	0.04	0.06	0.05	0.03	0.05	0.86	0.05	0.05	0.3	0.06	0.07	0.05	0.18	0.06	0.06	0.55	0.05	0.04	0.05	0.06	0.04	0.05	0.05	0.05	0.05	0.05	0.03	0.12	0.04	0.04	0.08	0.05	0.04	0.07	0.05	0.04	0.05	0.12	0.08	0.04
cg15669092	TUBB3	Pure Island	Within	0.06	0.04	0.04	0.02	0.03	0.02	0.03	0.03	0.03	0.02	0.02	0.03	0.35	0.03	0.05	0.1	0.07	0.86	0.05	0.05	0.08	0.04	0.02	0.02	0.02	0.39	0.02	0.02	0.27	0.02	0.03	0.02	0.01	0.29	0.03	0.35	0.06	0.22	0.03	0.03	0.02	0.03	0.03	0.06	0.05	0.03
cg15676084	ENAH	Pure Island	Within	0.05	0.04	0.05	0.05	0.03	0.04	0.03	0.04	0.03	0.02	0.11	0.03	0.18	0.16	0.91	0.12	0.11	0.04	0.1	0.1	0.15	0.15	0.02	0.01	0.02	0.03	0.03	0.02	0.02	0.02	0.03	0.02	0.01	0.05	0.06	0.06	0.17	0.08	0.06	0.05	0.05	0.05	0.07	0.63	0.06	0.03
cg15676241	ITGA2	Pure Island	Within	0.05	0.08	0.1	0.07	0.16	0.18	0.17	0.19	0.17	0.07	0.11	0.08	0.07	0.13	0.11	0.13	0.11	0.14	0.11	0.09	0.09	0.1	0.08	0.07	0.09	0.12	0.09	0.08	0.08	0.08	0.11	0.08	0.04	0.07	0.08	0.08	0.12	0.09	0.06	0.09	0.44	0.09	0.09	0.14	0.16	0.15
cg15700739	hsa-mir-615	Pure Island	Within	0.1	0.13	0.11	0.14	0.19	0.2	0.2	0.18	0.2	0.09	0.2	0.94	0.94	0.16	0.39	0.27	0.41	0.93	0.15	0.15	0.2	0.11	0.86	0.05	0.78	0.55	0.98	0.97	0.06	0.16	0.3	0.58	0.21	0.07	0.13	0.13	0.17	0.11	0.11	0.96	0.15	0.95	0.14	0.16	0.56	0.08
cg15717808	KCNQ5	Pure Island	Within	0.04	0.02	0.04	0.03	0.03	0.02	0.03	0.02	0.03	0.02	0.03	0.07	0.02	0.03	0.05	0.16	0.17	0.02	0.83	0.94	0.93	0.95	0.01	0.01	0.03	0.04	0.02	0.04	0.01	0.01	0.02	0.02	0.12	0.89	0.86	0.8	0.97	0.93	0.96	0.25	0.96	0.04	0.76	0.69	0.08	0.36
cg15725933	SLC19A1	Pure Island	Within	0.17	0.17	0.08	0.05	0.05	0.04	0.04	0.05	0.04	0.04	0.03	0.12	0.06	0.05	0.2	0.08	0.13	0.11	0.15	0.21	0.15	0.2	0.02	0.02	0.03	0.03	0.05	0.02	0.03	0.03	0.03	0.03	0.05	0.03	0.03	0.03	0.1	0.05	0.03	0.04	0.03	0.06	0.04	0.1	0.91	0.04
cg15729869	BARHL1	Pure Island	Within	0.07	0.03	0.08	0.02	0.02	0.02	0.02	0.02	0.03	0.01	0.12	0.21	0.25	0.14	0.1	0.12	0.05	0.16	0.44	0.14	0.93	0.95	0.23	0.01	0.14	0.03	0.19	0.31	0.01	0.27	0.03	0.31	0.01	0.02	0.97	0.34	0.92	0.45	0.87	0.92	0.97	0.09	0.94	0.93	0.41	0.9
cg15749748	GATA5	Pure Island	Within	0.08	0.04	0.04	0.03	0.05	0.06	0.04	0.04	0.06	0.02	0.12	0.38	0.68	0.32	0.12	0.87	0.22	0.72	0.81	0.58	0.87	0.92	0.65	0.23	0.84	0.92	0.84	0.62	0.46	0.49	0.12	0.62	0.26	0.08	0.87	0.79	0.86	0.94	0.91	0.3	0.93	0.03	0.51	0.78	0.63	0.76
cg15753757	AUTS2	Pure Island	Within	0.07	0.07	0.05	0.11	0.03	0.04	0.05	0.05	0.04	0.06	0.07	0.07	0.1	0.22	0.19	0.08	0.08	0.04	0.73	0.59	0.87	0.94	0.18	0.03	0.05	0.05	0.04	0.05	0.03	0.03	0.04	0.04	0.04	0.04	0.91	0.53	0.71	0.22	0.94	0.56	0.38	0.05	0.21	0.75	0.44	0.05
cg15755084	MSX1	Pure Island	Within	0.05	0.05	0.04	0.02	0.04	0.05	0.05	0.04	0.04	0.02	0.11	0.04	0.03	0.03	0.24	0.06	0.24	0.03	0.08	0.05	0.05	0.04	0.22	0.03	0.03	0.04	0.03	0.02	0.03	0.03	0.05	0.03	0.06	0.02	0.03	0.03	0.44	0.03	0.03	0.04	0.03	0.03	0.03	0.06	0.78	0.03
cg15757271	WNT5A	Pure Island	Within	0.04	0.04	0.03	0.2	0.03	0.04	0.03	0.03	0.03	0.05	0.03	0.15	0.9	0.04	0.04	0.06	0.35	0.03	0.04	0.14	NA	NA	0.06	0.03	0.03	0.03	0.05	0.03	0.02	0.02	0.02	0.02	0.04	0.02	0.07	0.04	0.73	0.05	0.02	0.09	0.08	0.04	0.43	0.6	0.07	0.03
cg15774153	FGF19	Pure Island	Within	0.08	0.06	0.04	0.01	0.04	0.03	0.04	0.03	0.03	0.02	0.03	0.97	0.96	0.89	0.28	0.96	0.43	0.39	0.07	0.07	0.96	0.97	0.31	0.98	0.62	0.98	0.65	0.6	0.01	0.29	0.07	0.96	0.01	0.03	0.02	0.98	0.06	0.99	0.97	0.58	0.98	0.1	0.98	0.33	0.91	0.48
cg15774283	PTGS2	Pure Island	Within	0.09	0.07	0.06	0.05	0.03	0.04	0.03	0.03	0.03	0.06	0.07	0.06	0.04	0.04	0.12	0.49	0.36	0.34	0.2	0.17	0.33	0.89	0.15	0.02	0.02	0.04	0.03	0.05	0.02	0.02	0.02	0.02	0.96	0.09	0.18	0.03	0.08	0.04	0.04	0.41	0.76	0.04	0.03	0.38	0.05	0.11
cg15774495	GRB10	Pure Island	Within	0.07	0.06	0.03	0.1	0.08	0.09	0.06	0.13	0.06	0.04	0.05	0.81	0.97	0.16	0.88	0.63	0.66	0.05	0.78	0.08	0.85	0.64	0.69	0.76	0.02	0.63	0.16	0.82	0.06	0.05	0.21	0.04	0.85	0.22	0.08	0.07	0.07	0.06	0.04	0.05	0.79	0.03	0.07	0.1	0.09	0.32
cg15786541	PVRL3	Pure Island	Within	0.18	0.2	0.07	0.02	0.04	0.03	0.03	0.04	0.03	0.02	0.03	0.08	0.06	0.04	0.2	0.09	0.29	0.11	0.39	0.24	0.19	0.21	0.02	0.03	0.03	0.04	0.04	0.02	0.03	0.03	0.03	0.02	0.02	0.02	0.04	0.03	0.05	0.03	0.04	0.04	0.16	0.04	0.02	0.15	0.06	0.03
cg15796941	BTBD11	Pure Island	Within	0.17	0.15	0.22	0.06	0.05	0.06	0.05	0.05	0.05	0.04	0.19	0.59	0.57	0.14	0.73	0.19	0.72	0.09	0.14	0.17	0.2	0.42	0.34	0.06	0.06	0.1	0.19	0.31	0.06	0.05	0.09	0.13	0.16	0.2	0.21	0.31	0.13	0.39	0.18	0.22	0.86	0.55	0.23	0.13	0.49	0.08
cg15802323	ARF5	Pure Island	Within	0.1	0.09	0.15	0.04	0.06	0.06	0.05	0.08	0.1	0.07	0.17	0.31	0.32	0.26	0.59	0.3	0.56	0.12	0.66	0.45	0.41	0.76	0.22	0.33	0.24	0.33	0.12	0.38	0.38	0.15	0.04	0.27	0.28	0.63	0.23	0.38	0.35	0.65	0.55	0.59	0.29	0.14	0.74	0.62	0.37	0.05
cg15802898	FOXE1	Pure Island	Within	0.12	0.09	0.06	0.06	0.06	0.07	0.04	0.06	0.05	0.05	0.17	0.7	0.89	0.58	0.55	0.87	0.3	0.75	0.84	0.6	0.9	0.83	0.58	0.91	0.94	0.89	0.54	0.64	0.84	0.77	0.17	0.92	0.43	0.36	0.7	0.83	0.85	0.92	0.89	0.49	0.9	0.22	0.76	0.79	0.74	0.49
cg15808558	EPHA4	Pure Island	Within	0.08	0.06	0.09	0.14	0.04	0.05	0.04	0.04	0.04	0.05	0.06	0.52	0.56	0.06	0.09	0.08	0.07	0.05	0.09	0.08	0.07	0.75	0.13	0.03	0.09	0.06	0.04	0.17	0.03	0.04	0.04	0.17	0.03	0.13	0.06	0.92	0.1	0.1	0.19	0.1	0.05	0.09	0.08	0.36	0.08	0.64
cg15816080	TPST1	Pure Island	Within	0.03	0.04	0.02	0.02	0.04	0.03	0.03	0.03	0.07	0.03	0.02	0.02	0.02	0.02	0.04	0.02	0.04	0.02	0.04	0.03	0.42	0.39	0.01	0.01	0.01	0.02	0.02	0.01	0.01	0.01	0.01	0.01	0.01	0.01	0.99	0.01	0.04	0.01	0.01	0.02	0.01	0.02	0.01	0.04	0.07	0.02
cg15817236	ALX4	Pure Island	Within	0.18	0.17	0.1	0.04	0.05	0.04	0.04	0.05	0.04	0.04	0.03	0.81	0.28	0.44	0.54	0.92	0.22	0.63	0.91	0.89	0.91	0.93	0.16	0.97	0.36	0.96	0.04	0.11	0.03	0.03	0.05	0.32	0.34	0.36	0.95	0.97	0.91	0.97	0.95	0.94	0.39	0.07	0.91	0.86	0.72	0.36
cg15822346	SLC16A10	Pure Island	Within	0.08	0.1	0.1	0.06	0.08	0.09	0.11	0.08	0.07	0.06	0.08	0.08	0.08	0.76	0.1	0.08	0.1	0.09	0.11	0.08	0.92	0.1	0.06	0.05	0.05	0.05	0.08	0.06	0.05	0.05	0.06	0.05	0.03	0.05	0.07	0.07	0.53	0.08	0.06	0.97	0.06	0.08	0.07	0.15	0.09	0.05
cg15824705	BCAR1	Pure Island	Within	0.08	0.06	0.04	0.03	0.03	0.04	0.04	0.04	0.03	0.03	0.02	0.04	0.04	0.03	0.09	0.08	0.05	0.04	0.06	0.06	0.06	0.06	0.02	0.02	0.02	0.02	0.03	0.03	0.02	0.02	0.02	0.02	0.02	0.02	0.04	0.03	0.07	0.03	0.03	0.03	0.03	0.04	0.02	0.13	0.07	0.03
cg15839448	SFRP1	Pure Island	Within	0.07	0.08	0.06	0.03	0.03	0.13	0.03	0.03	0.02	0.03	0.03	0.04	0.95	0.03	0.36	0.87	0.08	0.63	0.87	0.87	0.87	0.89	0.34	0.06	0.06	0.93	0.03	0.3	0.03	0.95	0.07	0.91	0.02	0.94	0.96	0.88	0.88	0.93	0.96	0.96	0.96	0.06	0.89	0.76	0.88	0.76
cg15840658	APBA1	Pure Island	Within	0.05	0.04	0.04	0.03	0.04	0.04	0.03	0.03	0.03	0.01	0.06	0.04	0.04	0.26	0.15	0.04	0.08	0.04	0.16	0.05	0.05	0.89	0.03	0.02	0.03	0.04	0.02	0.05	0.02	0.03	0.04	0.1	0.02	0.05	0.27	0.48	0.15	0.05	0.16	0.08	0.2	0.06	0.03	0.13	0.09	0.03
cg15852891	OTP	Associated Island	Within	0.1	0.09	0.06	0.05	0.04	0.03	0.03	0.04	0.04	0.03	0.03	0.25	0.58	0.13	0.13	0.67	0.16	0.14	0.81	0.78	0.8	0.72	0.7	0.19	0.44	0.77	0.83	0.74	0.91	0.27	0.43	0.33	0.94	0.45	0.36	0.26	0.26	0.71	0.5	0.6	0.92	0.34	0.31	0.84	0.52	0.42
cg15861540	TBXA2R	Pure Island	Within	0.16	0.07	0.05	0.02	0.02	0.02	0.02	0.03	0.03	0.01	0.09	0.49	0.05	0.04	0.25	0.05	0.06	0.04	0.08	0.08	0.11	0.06	0.02	0.04	0.14	0.03	0.02	0.02	0.02	0.02	0.03	0.06	0.02	0.34	0.03	0.04	0.06	0.96	0.02	0.04	0.02	0.03	0.02	0.04	0.08	0.02
cg15878317	NMNAT3	Pure Island	Within	0.08	0.2	0.13	0.06	0.06	0.05	0.04	0.05	0.04	0.05	0.15	0.44	0.05	0.11	0.87	0.36	0.11	0.07	0.12	0.12	0.13	0.09	0.13	0.03	0.03	0.29	0.58	0.11	0.03	0.05	0.04	0.21	0.07	0.17	0.03	0.04	0.21	0.33	0.04	0.14	0.92	0.08	0.03	0.07	0.1	0.28
cg15894661	ACCS	Pure Island	Within	0.1	0.09	0.05	0.03	0.03	0.03	0.03	0.03	0.03	0.03	0.06	0.41	0.04	0.03	0.14	0.06	0.07	0.06	0.1	0.1	0.12	0.09	0.02	0.02	0.02	0.03	0.03	0.02	0.03	0.02	0.03	0.04	0.93	0.05	0.03	0.03	0.05	0.03	0.03	0.03	0.23	0.03	0.03	0.03	0.05	0.04
cg15898840	IGFBP3	Pure Island	Within	0.05	0.06	0.03	0.04	0.05	0.03	0.04	0.04	0.03	0.02	0.02	0.98	0.98	0.05	0.91	0.43	0.03	0.73	0.07	0.13	0.11	0.98	0.37	0.18	0.02	0.68	0.03	0.01	0.01	0.01	0.02	0.02	0.01	0.03	0.03	0.63	0.97	0.98	0.69	0.98	0.98	0.81	0.74	0.35	0.04	0.02
cg15903421	DFNB31	Pure Island	Within	0.07	0.06	0.04	0.02	0.03	0.03	0.04	0.03	0.03	0.02	0.03	0.41	0.66	0.03	0.29	0.05	0.07	0.04	0.06	0.06	0.24	0.16	0.02	0.03	0.03	0.03	0.03	0.02	0.03	0.02	0.03	0.59	0.02	0.02	0.27	0.77	0.94	0.64	0.16	0.96	0.05	0.03	0.64	0.37	0.08	0.03
cg15910208	KLK10	Associated Island	Within	0.09	0.09	0.05	0.03	0.03	0.03	0.03	0.03	0.03	0.02	0.13	0.82	0.16	0.04	0.15	0.58	0.1	0.05	0.09	0.11	0.1	0.8	0.22	0.03	0.13	0.18	0.03	0.53	0.41	0.06	0.04	0.06	0.05	0.03	0.03	0.03	0.05	0.59	0.03	0.04	0.92	0.08	0.03	0.12	0.14	0.11
cg15925792	MX1	Pure Island	Within	0.1	0.12	0.08	0.16	0.1	0.11	0.09	0.09	0.1	0.16	0.04	0.72	0.11	0.09	0.17	0.9	0.13	0.1	0.31	0.17	0.35	0.13	0.08	0.88	0.87	0.95	0.05	0.05	0.05	0.04	0.05	0.85	0.94	0.05	0.06	0.06	0.12	0.93	0.67	0.08	0.97	0.08	0.06	0.75	0.19	0.06
cg15932716	GDF11	Pure Island	Within	0.05	0.06	0.03	0.02	0.03	0.03	0.03	0.03	0.03	0.01	0.02	0.03	0.03	0.03	0.06	0.04	0.06	0.05	0.06	0.07	0.05	0.06	0.02	0.02	0.02	0.02	0.03	0.02	0.02	0.02	0.02	0.02	0.02	0.02	0.03	0.03	0.05	0.03	0.03	0.06	0.02	0.03	0.03	0.07	0.07	0.03
cg15948326	C11orf45	Pure Island	Within	0.05	0.05	0.02	0.02	0.04	0.04	0.04	0.04	0.04	0.03	0.03	0.03	0.02	0.03	0.92	0.05	0.04	0.04	0.05	0.05	0.04	0.62	0.02	0.01	0.01	0.57	0.02	0.01	0.01	0.02	0.03	0.01	0.95	0.18	0.01	0.01	0.05	0.14	0.01	0.02	0.96	0.02	0.02	0.04	0.04	0.04
cg15955341	GSTM4	Pure Island	Within	0.05	0.05	0.03	0.05	0.03	0.03	0.03	0.03	0.03	0.09	0.02	0.05	0.62	0.47	0.91	0.04	0.06	0.04	0.11	0.06	0.06	0.13	0.05	0.02	0.03	0.03	0.02	0.02	0.02	0.02	0.03	0.02	0.05	0.02	0.03	0.02	0.07	0.4	0.03	0.03	0.04	0.04	0.02	0.08	0.04	0.03
cg15966253	UBE2E1	Pure Island	Within	0.06	0.07	0.04	0.11	0.06	0.05	0.04	0.05	0.05	0.05	0.03	0.05	0.04	0.04	0.1	0.06	0.1	0.05	0.1	0.1	0.09	0.07	0.03	0.03	0.04	0.04	0.07	0.03	0.03	0.04	0.04	0.03	0.09	0.04	0.06	0.04	0.11	0.05	0.04	0.05	0.03	0.05	0.04	0.07	0.06	0.04
cg15973234	KIAA1199	Pure Island	Within	0.19	0.06	0.05	0.11	0.04	0.04	0.04	0.04	0.04	0.04	0.06	0.28	0.53	0.07	0.17	0.1	0.06	0.05	0.21	0.07	0.07	0.81	0.34	0.03	0.06	0.04	0.04	0.22	0.04	0.04	0.06	0.09	0.05	0.05	0.04	0.22	0.07	0.54	0.04	0.11	0.07	0.05	0.06	0.55	0.07	0.04
cg15980408	TMEM22	Pure Island	Within	0.06	0.05	0.03	0.04	0.02	0.05	0.02	0.02	0.04	0.02	0.02	0.03	0.03	0.02	0.06	0.94	0.05	0.95	0.05	0.05	0.91	0.93	0.02	0.02	0.02	0.97	0.02	0.02	0.02	0.02	0.02	0.02	0.02	0.06	0.98	0.02	0.08	0.38	0.95	0.24	0.03	0.02	0.02	0.29	0.04	0.02
cg15984661	CCDC8	Pure Island	Within	0.09	0.11	0.08	0.12	0.06	0.07	0.08	0.06	0.06	0.08	0.15	0.43	0.89	0.56	0.32	0.8	0.55	0.47	0.74	0.75	0.78	0.69	0.11	0.89	0.81	0.86	0.89	0.62	0.86	0.56	0.07	0.69	0.47	0.14	0.34	0.61	0.43	0.85	0.66	0.83	0.88	0.17	0.66	0.72	0.21	0.84
cg15993674	PRNP	Pure Island	Within	0.06	0.06	0.04	0.03	0.02	0.03	0.04	0.04	0.03	0.02	0.02	0.04	0.03	0.03	0.06	0.05	0.06	0.04	0.06	0.06	0.06	0.05	0.03	0.03	0.03	0.03	0.02	0.03	0.03	0.02	0.03	0.03	0.02	0.02	0.03	0.59	0.05	0.03	0.03	0.18	0.03	0.03	0.03	0.04	0.06	0.03
cg16004226	B4GALNT4	Pure Island	Within	0.06	0.08	0.08	0.09	0.05	0.04	0.06	0.06	0.06	0.03	0.05	0.07	0.88	0.05	0.33	0.09	0.08	0.07	0.2	0.21	0.81	0.16	0.05	0.03	0.06	0.04	0.09	0.03	0.04	0.04	0.05	0.26	0.04	0.04	0.62	0.04	0.8	0.19	0.89	0.82	0.05	0.04	0.57	0.2	0.5	0.09
cg16041660	PRICKLE1	Pure Island	Within	0.11	0.12	0.06	0.02	0.02	0.03	0.03	0.09	0.03	0.01	0.02	0.04	0.04	0.03	0.11	0.05	0.08	0.59	0.1	0.26	0.93	0.94	0.05	0.01	0.02	0.03	0.02	0.09	0.02	0.02	0.02	0.41	0.22	0.02	0.98	0.69	0.96	0.29	0.98	0.07	0.05	0.04	0.05	0.29	0.06	0.03
cg16042149	NEFH	Pure Island	Within	0.11	0.09	0.1	0.13	0.06	0.06	0.07	0.07	0.04	0.06	0.06	0.58	0.91	0.47	0.39	0.85	0.81	0.86	0.8	0.63	0.8	0.82	0.25	0.41	0.91	0.91	0.86	0.3	0.04	0.11	0.36	0.86	0.09	0.04	0.94	0.93	0.89	0.91	0.93	0.87	0.91	0.23	0.9	0.79	0.82	0.86
cg16046465	FRMD5	Pure Island	Within	0.04	0.06	0.05	0.03	0.05	0.06	0.05	0.04	0.04	0.02	0.05	0.03	0.92	0.03	0.07	0.04	0.04	0.06	0.07	0.04	0.04	0.03	0.01	0.01	0.02	0.03	0.02	0.01	0.01	0.02	0.02	0.02	0.02	0.02	0.01	0.01	0.04	0.02	0.02	0.03	0.17	0.02	0.01	0.08	0.05	0.03
cg16063112	C10orf107	Pure Island	Within	0.18	0.1	0.08	0.09	0.05	0.07	0.07	0.06	0.07	0.08	0.11	0.07	0.93	0.38	0.57	0.11	0.38	0.52	0.5	0.77	0.86	0.86	0.06	0.03	0.04	0.11	0.09	0.24	0.21	0.51	0.16	0.65	0.84	0.94	0.6	0.14	0.87	0.48	0.9	0.83	0.91	0.05	0.62	0.33	0.18	0.04
cg16065186	ERBB2	Associated Island	Within	0.02	0.02	0.01	0.01	0.04	0.03	0.03	0.03	0.02	0.01	0.02	0.01	0.97	0.02	0.03	0.03	0.01	0.02	0.03	0.02	0.01	0.01	0.01	0.88	0.01	0.02	0.01	0.01	0.73	0.01	0.02	0.18	0.99	0.05	0.01	0.01	0.02	0.01	0.01	0.02	0.01	0.01	0.01	0.03	0.03	0.02
cg16092956	ACSL1	Pure Island	Within	0.06	0.07	0.06	0.03	0.07	0.07	0.06	0.09	0.07	0.03	0.04	0.05	0.05	0.06	0.07	0.07	0.12	0.07	0.1	0.06	0.07	0.06	0.04	0.03	0.04	0.05	0.04	0.02	0.03	0.03	0.05	0.04	0.06	0.04	0.04	0.05	0.06	0.03	0.03	0.04	0.05	0.08	0.04	0.08	0.07	0.06
cg16098981	C20orf39	Associated Island	Within	0.07	0.08	0.07	0.04	0.04	0.05	0.06	0.04	0.05	0.02	0.07	0.05	0.9	0.65	0.46	0.07	0.81	0.86	0.88	0.87	0.84	0.91	0.31	0.42	0.32	0.19	0.22	0.53	0.08	0.4	0.16	0.05	0.63	0.6	0.92	0.93	0.84	0.92	0.93	0.93	0.91	0.07	0.18	0.73	0.85	0.74
cg16111791	CACNB4	Pure Island	Within	0.05	0.04	0.05	0.1	0.11	0.12	0.12	0.12	0.13	0.04	0.1	0.05	0.05	0.21	0.31	0.11	0.35	0.08	0.1	0.06	0.94	0.47	0.17	0.03	0.04	0.08	0.03	0.04	0.04	0.03	0.08	0.47	0.04	0.03	0.96	0.06	0.5	0.09	0.04	0.77	0.41	0.06	0.34	0.73	0.12	0.11
cg16154416	RASGRF1	Pure Island	Within	0.13	0.15	0.1	0.1	0.07	0.08	0.05	0.07	0.07	0.04	0.06	0.81	0.92	0.47	0.41	0.31	0.12	0.4	0.86	0.87	0.79	0.82	0.91	0.36	0.57	0.05	0.28	0.58	0.35	0.67	0.2	0.97	0.3	0.95	0.96	0.95	0.92	0.94	0.91	0.92	0.91	0.87	0.92	0.88	0.91	0.53
cg16158807	WNK2	Pure Island	Within	0.12	0.11	0.13	0.17	0.1	0.1	0.08	0.08	0.07	0.09	0.15	0.4	0.39	0.6	0.87	0.37	0.12	0.14	0.14	0.14	0.09	0.11	0.12	0.06	0.18	0.22	0.53	0.46	0.17	0.14	0.06	0.29	0.09	0.1	0.08	0.09	0.13	0.29	0.64	0.43	0.24	0.12	0.13	0.21	0.78	0.36
cg16211684	PCDH21	Pure Island	Within	0.12	0.1	0.07	0.03	0.04	0.04	0.04	0.04	0.05	0.03	0.07	0.32	0.5	0.18	0.47	0.73	0.24	0.3	0.35	0.19	0.83	0.77	0.3	0.03	0.36	0.53	0.62	0.3	0.06	0.07	0.08	0.38	0.02	0.05	0.4	0.78	0.3	0.55	0.44	0.84	0.59	0.18	0.48	0.69	0.48	0.42
cg16232979	TPM4	Pure Island	Within	0.06	0.04	0.02	0.04	0.08	0.07	0.1	0.09	0.08	0.05	0.05	0.03	0.04	0.03	0.06	0.05	0.04	0.97	0.08	0.05	0.06	0.03	0.02	0.01	0.02	0.03	0.04	0.02	0.02	0.02	0.02	0.02	0.04	0.02	0.02	0.03	0.05	0.02	0.03	0.99	0.58	0.04	0.72	0.65	0.07	0.03
cg16241714	CEBPD	Pure Island	Within	0.06	0.05	0.03	0.02	0.02	0.02	0.02	0.02	0.02	0.01	0.02	0.03	0.03	0.02	0.06	0.05	0.05	0.03	0.06	0.06	0.04	0.04	0.02	0.02	0.02	0.02	0.01	0.02	0.02	0.02	0.02	0.02	0.01	0.03	0.02	0.02	0.03	0.02	0.02	0.02	0.03	0.03	0.01	0.07	0.06	0.02
cg16249454	CXCL2	Pure Island	Within	0.04	0.04	0.03	0.03	0.03	0.03	0.03	0.03	0.03	0.02	0.02	0.8	0.02	0.02	0.88	0.08	0.15	0.04	0.04	0.05	0.07	0.13	0.01	0.05	0.01	0.25	0.03	0.02	0.03	0.01	0.02	0.02	0.03	0.1	0.02	0.02	0.02	0.02	0.02	0.02	0.02	0.02	0.02	0.07	0.03	0.03
cg16254764	HDAC11	Pure Island	Within	0.12	0.1	0.08	0.03	0.04	0.05	0.04	0.06	0.05	0.03	0.11	0.08	0.13	0.18	0.39	0.1	0.12	0.08	0.26	0.1	0.18	0.13	0.1	0.39	0.14	0.17	0.06	0.51	0.22	0.26	0.07	0.83	0.03	0.27	0.1	0.11	0.3	0.72	0.17	0.32	0.06	0.12	0.08	0.11	0.09	0.15
cg16276070	ZNF550	Pure Island	Within	0.06	0.05	0.07	0.02	0.04	0.04	0.03	0.04	0.02	0.02	0.04	0.05	0.05	0.04	0.07	0.15	0.09	0.04	0.85	0.81	0.82	0.47	0.03	0.03	0.16	0.41	0.03	0.02	0.02	0.03	0.03	0.03	0.03	0.03	0.03	0.28	0.49	0.08	0.92	0.07	0.04	0.06	0.03	0.58	0.5	0.03
cg16306115	DCDC2	Pure Island	Within	0.25	0.11	0.06	0.1	0.07	0.06	0.05	0.06	0.05	0.08	0.06	0.93	0.95	0.2	0.64	0.23	0.35	0.43	0.09	0.14	0.85	0.89	0.37	0.02	0.03	0.04	0.32	0.08	0.03	0.07	0.03	0.8	0.94	0.05	0.96	0.05	0.93	0.04	0.34	0.11	0.56	0.07	0.05	0.86	0.12	0.06
cg16312163	ALDH1L1	Pure Island	Within	0.1	0.1	0.04	0.05	0.05	0.04	0.04	0.06	0.05	0.03	0.08	0.35	0.95	0.14	0.65	0.88	0.54	0.08	0.14	0.11	0.74	0.89	0.29	0.02	0.28	0.91	0.41	0.04	0.11	0.02	0.03	0.56	0.02	0.03	0.02	0.9	0.42	0.65	0.03	0.95	0.76	0.04	0.8	0.89	0.08	0.41
cg16326979	OXR1	Pure Island	Within	0.06	0.05	0.05	0.02	0.03	0.03	0.02	0.03	0.03	0.02	0.03	0.03	0.04	0.03	0.08	0.04	0.06	0.04	0.06	0.07	0.05	0.06	0.01	0.02	0.02	0.02	0.03	0.02	0.02	0.02	0.02	0.02	0.01	0.02	0.03	0.05	0.08	0.04	0.02	0.03	0.12	0.05	0.03	0.03	0.05	0.02
cg16336120	RAMP3	Pure Island	Within	0.17	0.17	0.09	0.07	0.1	0.08	0.08	0.09	0.09	0.04	0.06	0.07	0.28	0.08	0.16	0.15	0.16	0.09	0.32	0.25	0.19	0.62	0.1	0.05	0.05	0.17	0.12	0.26	0.05	0.04	0.06	0.05	0.08	0.05	0.11	0.09	0.16	0.24	0.1	0.22	0.76	0.05	0.07	0.43	0.16	0.07
cg16357921	CCRK	Pure Island	Within	0.04	0.05	0.05	0.01	0.02	0.03	0.02	0.03	0.02	0.04	0.03	0.03	0.05	0.03	0.54	0.04	0.04	0.04	0.05	0.12	0.94	0.04	0.01	0.02	0.02	0.02	0.02	0.02	0.01	0.01	0.02	0.01	0.01	0.04	0.02	0.03	0.04	0.04	0.03	0.03	0.02	0.04	0.03	0.03	0.07	0.02
cg16382256	EPHB3	Pure Island	Within	0.03	0.03	0.04	0.17	0.04	0.05	0.03	0.04	0.04	0.03	0.02	0.04	0.03	0.02	0.04	0.03	0.04	0.02	0.04	0.04	0.03	0.87	0.01	0.01	0.02	0.02	0.03	0.01	0.01	0.02	0.02	0.02	0.05	0.01	0.01	0.02	0.03	0.02	0.04	0.03	0.05	0.03	0.02	0.03	0.04	0.03
cg16382322	ARAP3	Pure Island	Within	0.08	0.13	0.06	0.09	0.04	0.03	0.03	0.04	0.03	0.02	0.03	0.05	0.04	0.03	0.41	0.11	0.09	0.07	0.08	0.13	0.11	0.09	0.15	0.05	0.03	0.04	0.03	0.03	0.04	0.03	0.03	0.03	0.9	0.67	0.04	0.05	0.04	0.04	0.04	0.04	0.12	0.06	0.03	0.06	0.05	0.03
cg16400825	ITPR3	Pure Island	Within	0.05	0.06	0.03	0.02	0.04	0.04	0.04	0.05	0.04	0.02	0.03	0.02	0.04	0.03	0.06	0.05	0.04	0.04	0.07	0.06	0.05	0.04	0.08	0.02	0.02	0.03	0.02	0.01	0.02	0.02	0.03	0.02	0.01	0.14	0.02	0.02	0.05	0.03	0.02	0.03	0.03	0.02	0.02	0.05	0.06	0.03
cg16428251	SOX14	Pure Island	Within	0.07	0.12	0.06	0.02	0.07	0.04	0.04	0.08	0.08	0.02	0.12	0.67	0.9	0.3	0.15	0.78	0.61	0.66	0.41	0.24	0.84	0.87	0.39	0.81	0.53	0.86	0.46	0.51	0.03	0.83	0.49	0.63	0.59	0.1	0.5	0.55	0.81	0.64	0.6	0.61	0.87	0.61	0.8	0.74	0.62	0.81
cg16500334	SUMO3	Pure Island	Within	0.23	0.08	0.11	0.03	0.08	0.13	0.1	0.1	0.07	0.06	0.17	0.13	0.06	0.25	0.77	0.33	0.25	0.1	0.44	0.07	0.27	0.92	0.07	0.46	0.3	0.46	0.11	0.09	0.1	0.04	0.03	0.17	0.67	0.05	0.47	0.05	0.41	0.16	0.49	0.87	0.82	0.34	0.11	0.93	0.21	0.04
cg16509658	GABRB2	Pure Island	Within	0.02	0.06	0.03	0.15	0.04	0.05	0.03	0.04	0.03	0.03	0.02	0.05	0.56	0.32	0.3	0.85	0.65	0.05	0.42	0.05	0.83	NA	0.43	0.02	0.22	0.89	0.03	0.31	0.01	0.08	0.04	0.38	0.04	0.03	0.87	0.67	0.79	0.88	0.79	0.95	0.93	0.02	0.63	0.84	0.49	0.06
cg16534233	RIMKLA	Pure Island	Within	0.05	0.06	0.05	0.03	0.04	0.04	0.04	0.04	0.04	0.02	0.08	0.04	0.04	0.12	0.34	0.05	0.06	0.04	0.06	0.06	0.05	0.2	0.02	0.02	0.02	0.03	0.02	0.02	0.02	0.02	0.03	0.03	0.02	0.02	0.03	0.02	0.03	0.02	0.02	0.04	0.04	0.04	0.04	0.07	0.12	0.03
cg16541031	IRF7	Pure Island	Within	0.18	0.1	0.06	0.09	0.05	0.04	0.03	0.03	0.04	0.14	0.23	0.83	0.11	0.06	0.88	0.09	0.08	0.44	0.26	0.11	0.08	0.4	0.04	0.05	0.27	0.07	0.58	0.04	0.04	0.06	0.03	0.25	0.16	0.9	0.05	0.09	0.09	0.5	0.03	0.92	0.92	0.25	0.03	0.12	0.06	0.8
cg16551261	LRRC6	Pure Island	Within	0.09	0.15	0.12	0.15	0.07	0.08	0.09	0.09	0.07	0.18	0.08	0.06	0.06	0.1	0.14	0.1	0.38	0.07	0.25	NA	0.6	0.51	0.1	0.06	0.05	0.09	0.05	0.08	0.06	0.05	0.06	0.07	0.14	0.07	0.07	0.08	0.11	0.08	0.1	0.91	0.11	0.19	0.11	0.13	0.11	0.06
cg16564824	SNAP25	Pure Island	Within	0.12	0.14	0.08	0.05	0.03	0.03	0.04	0.04	0.03	0.04	0.03	0.08	0.92	0.09	0.13	0.06	0.55	0.1	0.12	0.18	0.86	0.83	0.11	0.02	0.02	0.13	0.03	0.02	0.03	0.02	0.03	0.02	0.02	0.03	0.94	0.86	0.91	0.72	0.93	0.39	0.66	0.04	0.84	0.27	0.61	0.03
cg16580737	MME	Associated Island	Within	0.09	0.08	0.07	0.2	0.05	0.06	0.05	0.05	0.05	0.05	0.03	0.9	0.94	0.04	0.07	0.91	0.08	0.88	0.88	0.43	0.91	0.91	0.02	0.03	0.04	0.95	0.05	0.07	0.03	0.04	0.04	0.04	0.07	0.02	0.95	0.92	0.88	0.63	0.93	0.1	0.93	0.07	0.03	0.89	0.88	0.04
cg16584573	FGF8	Pure Island	Within	0.04	0.04	0.03	0.02	0.03	0.02	0.02	0.02	0.02	0.02	0.1	0.97	0.21	0.06	0.69	0.06	0.33	0.13	0.95	0.3	0.95	0.97	0.41	0.02	0.12	0.57	0.18	0.36	0.02	0.04	0.02	0.78	0.05	0.13	0.96	0.99	0.96	0.62	0.98	0.46	0.61	0.39	0.99	0.9	0.5	0.1
cg16588061	CTSC	Pure Island	Within	0.1	0.12	0.05	0.02	0.03	0.03	0.03	0.04	0.04	0.08	0.03	0.05	0.04	0.03	0.91	0.09	0.1	0.06	0.12	0.1	0.09	0.1	0.02	0.02	0.02	0.03	0.04	0.02	0.02	0.03	0.03	0.02	0.03	0.02	0.03	0.03	0.05	0.02	0.25	0.03	0.48	0.04	0.02	0.08	0.05	0.04
cg16597172	MYCN	Pure Island	Within	0.08	0.07	0.05	0.06	0.03	0.03	0.03	0.04	0.02	0.03	0.03	0.04	0.04	0.09	0.12	0.15	0.07	0.04	0.19	0.1	0.07	0.69	0.15	0.04	0.03	0.03	0.03	0.07	0.02	0.05	0.07	0.09	0.02	0.02	0.03	0.03	0.08	0.03	0.04	0.08	0.29	0.05	0.04	0.41	0.08	0.06
cg16608348	PTPN14	Pure Island	Within	0.04	0.05	0.04	0.02	0.02	0.02	0.02	0.02	0.02	0.01	0.02	0.03	0.03	0.03	0.05	0.04	0.05	0.03	0.06	0.06	0.06	0.04	0.02	0.16	0.02	0.02	0.02	0.02	0.02	0.02	0.05	0.02	0.96	0.02	0.02	0.02	0.04	0.03	0.02	0.02	0.03	0.02	0.02	0.06	0.04	0.02
cg16632280	LTBP3	Pure Island	Within	0.07	0.07	0.05	0.04	0.05	0.06	0.05	0.06	0.06	0.03	0.11	0.08	0.29	0.06	0.06	0.11	0.18	0.07	0.11	0.09	0.68	0.45	0.06	0.05	0.05	0.06	0.03	0.1	0.24	0.07	0.05	0.06	0.05	0.1	0.13	0.52	0.1	0.05	0.26	0.65	0.07	0.06	0.07	0.13	0.07	0.07
cg16638540	ZNF135	Pure Island	Within	0.11	0.1	0.1	0.04	0.03	0.03	0.09	0.03	0.04	0.02	0.21	0.07	0.98	0.77	0.61	0.81	0.12	0.08	0.9	0.96	0.94	0.97	0.36	0.98	0.94	0.97	0.02	0.55	0.98	0.32	0.91	0.73	0.96	0.98	0.98	0.99	0.94	0.98	0.98	0.75	0.99	0.98	0.96	0.94	0.95	0.88
cg16689634	CYP4X1	Pure Island	Within	0.15	0.19	0.17	0.06	0.05	0.06	0.04	0.05	0.05	0.04	0.14	0.84	0.9	0.25	0.55	0.88	0.12	0.08	0.7	0.24	0.28	0.89	0.35	0.03	0.77	0.89	0.17	0.27	0.05	0.04	0.07	0.66	0.13	0.1	0.08	0.36	0.32	0.43	0.15	0.19	0.19	0.23	0.14	0.75	0.16	0.43
cg16718678	NRXN2	Pure Island	Within	0.09	0.09	0.07	0.07	0.07	0.06	0.08	0.06	0.09	0.06	0.03	0.08	0.07	0.07	0.1	0.07	0.08	0.07	0.11	0.09	0.84	0.85	0.03	0.03	0.04	0.04	0.07	0.03	0.03	0.03	0.03	0.04	0.05	0.05	0.93	0.04	0.1	0.04	0.04	0.07	0.06	0.05	0.07	0.08	0.09	0.04
cg16721845	MTL5	Pure Island	Within	0.03	0.05	0.03	0.02	0.03	0.03	0.03	0.03	0.02	0.01	0.02	0.43	0.02	0.02	0.05	0.03	0.04	0.03	0.14	0.03	0.03	0.04	0.02	0.01	0.01	0.02	0.01	0.01	0.01	0.01	0.02	0.08	0.01	0.02	0.01	0.01	0.03	0.61	0.01	0.02	0.02	0.02	0.01	0.03	0.08	0.1
cg16741710	TP73	Pure Island	Within	0.07	0.1	0.08	0.03	0.04	0.04	0.06	0.05	0.06	0.03	0.17	0.05	0.88	0.65	0.92	0.29	0.08	0.05	0.07	0.44	0.38	0.05	0.19	0.03	0.44	0.04	0.03	0.03	0.14	0.32	0.06	0.56	0.03	0.05	0.05	0.04	0.07	0.04	0.04	0.09	0.93	0.06	0.04	0.07	0.15	0.17
cg16745616	ANGPTL4	Pure Island	Within	0.17	0.18	0.1	0.21	0.09	0.1	0.1	0.1	0.09	0.15	0.07	0.85	0.1	0.09	0.8	0.34	0.6	0.12	0.74	0.43	0.8	0.5	0.08	0.1	0.07	0.18	0.09	0.26	0.08	0.45	0.08	0.66	0.12	0.1	0.65	0.17	0.25	0.29	0.3	0.63	0.06	0.11	0.19	0.25	0.45	0.11
cg16756998	ZDHHC8	Pure Island	Within	0.06	0.09	0.05	0.02	0.03	0.04	0.03	0.03	0.03	0.02	0.03	0.03	0.04	0.04	0.07	0.06	0.07	0.96	0.08	0.08	0.06	0.06	0.02	0.03	0.03	0.03	0.03	0.02	0.02	0.03	0.02	0.03	0.02	0.03	0.12	0.04	0.07	0.05	0.04	0.07	0.04	0.05	0.03	0.1	0.11	0.03
cg16773899	EDIL3	Pure Island	Within	0.1	0.07	0.09	0.09	0.02	0.02	0.02	0.03	0.03	0.03	0.08	0.04	0.06	0.36	0.13	0.08	0.72	0.14	0.88	0.89	0.9	0.91	0.17	0.04	0.09	0.08	0.03	0.08	0.03	0.03	0.04	0.04	0.01	0.05	0.89	0.93	0.8	0.51	0.96	0.91	0.71	0.1	0.9	0.87	0.17	0.07
cg16778809	ADAM23	Pure Island	Within	0.06	0.13	0.07	0.07	0.04	0.05	0.04	0.05	0.04	0.02	0.1	0.05	0.09	0.05	0.09	0.45	0.73	0.88	0.64	0.23	0.89	0.89	0.25	0.03	0.03	0.43	0.03	0.02	0.03	0.02	0.03	0.02	0.02	0.03	0.98	0.18	0.95	0.03	0.58	0.64	0.05	0.05	0.98	0.95	0.64	0.04
cg16778903	BRUNOL6	Pure Island	Within	0.03	0.05	0.03	0.01	0.04	0.05	0.07	0.04	0.07	0.02	0.06	0.02	0.01	0.03	0.77	0.05	0.04	0.03	0.04	0.03	0.44	0.95	0.01	0.01	0.01	0.02	0.01	0.01	0.02	0.01	0.02	0.01	0.01	0.01	0.01	0.01	0.06	0.01	0.07	0.02	0.02	0.02	0.02	0.76	0.31	0.03
cg16786703	ADAM8	Pure Island	Within	0.07	0.05	0.05	0.03	0.11	0.04	0.04	0.07	0.13	0.01	0.06	0.91	0.95	0.15	0.92	0.91	0.9	0.26	0.91	0.83	0.86	0.91	0.62	0.4	0.98	0.94	0.97	0.59	0.04	0.96	0.03	0.97	0.2	0.03	0.02	0.88	0.04	0.77	0.98	0.09	0.97	0.66	0.03	0.91	0.06	0.94
cg16787600	SORCS3	Pure Island	Within	0.12	0.09	0.08	0.19	0.05	0.07	0.13	0.06	0.06	0.07	0.07	0.85	0.96	0.53	0.27	0.87	0.75	0.76	0.88	0.87	0.83	0.84	0.37	0.05	0.06	0.92	0.11	0.67	0.37	0.35	0.9	0.6	NA	0.89	0.94	0.9	0.81	0.91	0.94	0.94	0.95	0.66	0.82	0.85	0.68	0.92
cg16792800	GPC6	Pure Island	Within	0.09	0.07	0.07	0.12	0.08	0.09	0.09	0.1	0.1	0.14	0.08	0.06	0.95	0.08	0.09	0.13	0.63	0.08	0.84	0.89	0.94	0.93	0.04	0.04	0.08	0.05	0.09	0.25	0.04	0.04	0.04	0.07	0.04	0.1	0.89	0.63	0.84	0.95	0.94	0.94	0.94	0.09	0.43	0.84	0.08	0.56
cg16796590	MFSD2	Pure Island	Within	0.12	0.14	0.08	0.25	0.06	0.07	0.07	0.07	0.09	0.23	0.06	0.76	0.05	0.05	0.75	0.41	0.14	0.12	0.19	0.2	0.17	0.11	0.04	0.03	0.04	0.33	0.06	0.03	0.02	0.05	0.05	0.06	0.19	0.05	0.04	0.07	0.07	0.17	0.09	0.14	0.05	0.06	0.07	0.16	0.05	0.07
cg16861508	TNFRSF10B	Pure Island	Within	0.07	0.06	0.04	0.09	0.15	0.08	0.18	0.1	0.08	0.12	0.05	0.2	0.14	0.1	0.25	0.3	0.09	0.04	0.08	0.06	0.04	0.06	0.05	0.48	0.03	0.25	0.06	0.02	0.03	0.03	0.03	0.04	0.85	0.06	0.03	0.04	0.07	0.03	0.03	0.05	0.32	0.05	0.02	0.08	0.08	0.07
cg16872560	PPP1R9A	Pure Island	Within	0.05	0.19	0.17	0.05	0.05	0.04	0.04	0.1	0.04	0.04	0.18	0.03	0.42	0.12	0.53	0.04	0.06	0.04	0.07	0.07	0.06	0.03	0.02	0.06	0.03	0.03	0.03	0.16	0.03	0.03	0.03	0.04	0.02	0.03	0.09	0.05	0.05	0.04	0.04	0.05	0.3	0.04	0.03	0.09	0.07	0.03
cg16884042	SGPP2	Pure Island	Within	0.17	0.18	0.07	0.09	0.15	0.14	0.15	0.15	0.12	0.12	0.11	0.89	0.92	0.09	0.67	0.13	0.16	0.13	0.25	0.28	0.1	0.94	0.73	0.57	0.14	0.13	0.3	0.39	0.06	0.07	0.07	0.59	0.07	0.36	0.07	0.08	0.06	0.95	0.07	0.08	0.97	0.08	0.07	0.48	0.15	0.18
cg16898420	PPAPR3	Pure Island	Within	0.05	0.07	0.05	0.05	0.04	0.04	0.04	0.04	0.06	0.02	0.09	0.04	0.85	0.23	0.48	0.08	0.36	0.05	0.18	0.09	0.49	0.71	0.3	0.04	0.05	0.05	0.05	0.13	0.04	0.05	0.04	0.1	0.03	0.3	0.04	0.07	0.38	0.26	0.5	0.24	0.53	0.07	0.31	0.59	0.26	0.18
[truncated: 992 more rows]
[truncated: 19 more columns]
