# Supplementary material for: A DNA hypermethylation module for the stem/progenitor cell signature of cancer
Source: HighWire-hosted journal article supplement (doi:10.1101/gr.131169.111), 2012-03-05
Supplement: Table_S2.xlsx [file Table_S2.xlsx]

## Sheet: Genelists
List of genes marked in hESC by H3K4Me3 or H3K27Me3 and represented in the Illumina methylation array that were used as the 'universe' for the GO analysis			Genes identifies in the significant GO categories
hESC-H3K4Me3	hESC-Bivalent	Genes methyalted across various tumor cell lines	Methyalted genes marked by H3K4Me3 in hESC and represented in the significant GO categories	Methyalted genes marked by bivalent chromatin in hESC and represented in the significant GO categories
ABL2	ABHD7	AADAT	ABHD5	AATF
ACADM	ACTA1	AATF	ACD	ABCA1
ACBD3	ACTN2	AATK	ADAMTS3	ACADL
ACBD6	ADAM15	ABCA1	ADCY2	ACAN
ACP6	AJAP1	ABCA5	ADD2	ACE
ADAR	AK3L1	ABCB6	AHR	ACHE
ADIPOR1	AK5	ABCC3	AKAP12	ACSL1
ADPRHL2	AL008733.10	ABCC8	ALCAM	ACSL6
ADSS	AL121988.10	ABHD5	ALDH3A2	ACTN2
AHCYL1	AL592464.24	ABHD7	ANTXR1	ACVR1C
AK2	ALPL	ABHD8	ANXA2	ACVRL1
AKR7A2	ANKRD34A	ABLIM3	ANXA5	ADAM12
AL136378.14	ANKRD35	ABO	APH1B	ADAM23
AL139287.24	ARF1	ABTB2	ARHGEF10	ADAMTS1
AL157904.24	ARHGAP29	AC006273.1	ARHGEF3	ADAMTS14
AL357673.12	ARV1	AC008073.5	ARL4D	ADAMTS9
AL445435.11	AVPR1B	AC008074.1	ARRB2	ADCY1
AL450998.19	BAI2	AC009336.13	ASNS	ADCY5
AL590666.8	BARHL2	AC026250.16	AXIN1	ADCY6
ALDH4A1	BCAN	AC079610.4	BCAR1	ADCY8
AMPD2	BCAR3	AC080164.6	BCL11A	ADCYAP1
ANGEL2	BMP8A	AC106900.1	BCL9L	ADORA2B
ANKRD13C	BTG2	AC108142.1	BCR	ADRA1A
ANP32E	BXDC5	AC114947.1	BMP2K	ADRA1D
AOF2	C1orf115	AC121493.1	BMPR1A	ADRA2A
AQP10	C1orf126	AC130454.2	BRSK2	ADRB2
ARHGEF2	C1orf132	AC135352.6	BSG	AGPAT9
ARID1A	C1orf133	ACADL	C20orf149	AGTR1
ARID4B	C1orf159	ACAN	C9orf127	ALDH1A3
ARNT	C1orf194	ACCS	CACNA1H	ALK
ASPM	C1orf200	ACD	CACNA2D1	ALOX5
ATP13A2	C1orf21	ACE	CACNB1	ALPL
ATP1B1	C1orf213	ACHE	CAPG	ALX1
ATP5F1	C1orf59	ACN9	CD24L4	ALX4
ATP6V0B	C1orf65	ACP1	CD276	AMOT
ATP8B2	CAMK2N1	ACP6	CD81	AMPH
ATPAF1	CDKN2C	ACSF2	CDC42BPB	ANGPTL4
ATPIF1	CHD5	ACSL1	CDC42EP3	APBA1
B3GALNT2	CITED4	ACSL6	CDH1	APBB1
B3GALT6	CLSTN1	ACTN2	CDK5R1	APP
B4GALT2	CMPK1	ACTN3	CDKL2	AQP11
BAT2D1	CNIH3	ACTR6	CELSR3	ARC
BOLA1	COL9A2	ACVR1C	CHN1	ARF5
BRP44	CR2	ACVRL1	CLDN7	ARG2
BSDC1	CRABP2	ADAM12	CNIH2	ARHGAP21
BTBD8	CSF1	ADAM19	CNN3	ARHGAP22
C1orf101	CSRP1	ADAM23	COL6A1	ARHGAP26
C1orf102	CYR61	ADAM33	COL7A1	ARHGDIG
C1orf106	DAB1	ADAM8	CORO2A	ARHGEF1
C1orf107	DDAH1	ADAMTS1	CREM	ARHGEF17
C1orf109	DFFA	ADAMTS10	CSRP2BP	ARL4C
C1orf122	DNM3	ADAMTS14	CST3	ARNT2
C1orf123	DUSP10	ADAMTS15	CTGF	ARSA
C1orf124	DVL1	ADAMTS17	CTSC	ASCL1
C1orf131	E2F2	ADAMTS18	CXCL2	ATOH1
C1orf135	ECE1	ADAMTS19	DBN1	ATOH8
C1orf149	EFNA1	ADAMTS3	DCBLD2	ATP10A
C1orf163	EFNA3	ADAMTS5	DDAH2	ATRN
C1orf174	EPB41	ADAMTS9	DHRS3	ATRNL1
C1orf187	EPHA10	ADAMTSL2	DKKL1	B3GNT5
C1orf190	EPHA8	ADAMTSL3	DSC2	BAIAP3
C1orf2	EPHB2	ADARB2	DSG2	BARHL1
C1orf216	ERRFI1	ADCY1	DYRK1B	BARHL2
C1orf223	ESPN	ADCY2	EDIL3	BARX2
C1orf25	FAM129A	ADCY5	EFEMP2	BBS5
C1orf26	FAM43B	ADCY6	ELOVL4	BCAR3
C1orf27	FAM46C	ADCY8	ENPP1	BCL11B
C1orf35	FAM5B	ADCYAP1	EPHB4	BCL2
C1orf43	FAM89A	ADD2	ERBB2	BIK
C1orf50	FOXD2	ADHFE1	ERBB3	BMP3
C1orf57	FOXD3	ADORA2B	EVC	BMP4
C1orf58	FUCA1	ADPRH	FADS1	BMP6
C1orf63	G0S2	ADRA1A	FBXO6	BMP7
C1orf66	GBA	ADRA1D	FGFR2	BMP8B
C1orf71	GFI1	ADRA2A	FGFR4	BMPER
C1orf74	GIPC2	ADRB2	FKBP1B	BMPR1B
C1orf77	GJB3	AGBL5	FOXA3	BNC1
C1orf83	GNG12	AGPAT3	FSTL1	BOC
C1orf86	GPR137B	AGPAT9	FZD6	BTG2
C1orf88	GPR153	AGPS	FZD7	C6orf145
C1orf91	GPR157	AGTR1	GABBR1	CA4
C1orf93	GPR88	AGXT2L1	GAMT	CA8
C1orf96	GPX7	AHR	GDF11	CACNA1C
CACYBP	GRIK3	AIFM2	GNA11	CACNA1G
CALML6	GRRP1	AIP	GNA12	CACNB2
CAMSAP1L1	GSTM3	AJAP1	GNB4	CACNB3
CAP1	GUK1	AK1	GPR125	CACNB4
CAPZA1	HES2	AK5	GPR160	CACNG2
CASP9	HES4	AKAP12	GPR176	CACNG4
CCBL2	HES5	AKR1B1	GRB14	CADM1
CCDC18	HEYL	AL121789.38	GSTP1	CALCA
CCDC21	HHAT	ALCAM	GTF2IRD1	CAMK2B
CCDC23	HLX	ALDH1A3	HAPLN3	CAMK2D
CCDC24	HNRNPR	ALDH1L1	HBEGF	CAMK4
CCDC76	HPCA	ALDH3A2	HIF3A	CAMTA2
CD46	HTR6	ALK	HMGA2	CARTPT
CD55	IER5	ALOX5	HOMER1	CAV1
CD58	IGSF21	ALPL	HOOK1	CCNA1
CDC14A	IL6R	ALS2CL	HSD17B12	CCND1
CDC20	INSRR	ALX1	ID4	CCND2
CDC42	ITPKB	ALX4	IGF2BP1	CD44
CDC42SE1	JUN	AMOT	IGF2BP2	CD59
CDC7	KANK4	AMOTL2	IGFBP2	CD70
CDCA8	KCNA3	AMPH	IGFBP4	CD8A
CDCP2	KCNC4	ANGPTL4	IL12A	CD9
CENPF	KCND3	ANKMY1	INADL	CDH11
CENPL	KCNH1	ANKRD43	IQSEC1	CDH2
CEP350	KCNJ10	ANKRD5	ITPR3	CDKN1C
CEPT1	KCNQ4	ANTXR1	JPH1	CDKN2A
CHD1L	KIAA1324	ANUBL1	JPH3	CDKN2B
CKS1B	KIF17	ANXA2	JRKL	CDO1
CLCC1	KLHL17	ANXA5	KCNJ11	CDS1
CLCN6	LAD1	AP1S1	KCNK1	CDX2
CLIC4	LEPR	AP1S3	KCNK5	CERCAM
CLK2	LHX4	AP3B2	KCNMB4	CHN2
CLSPN	LHX9	AP3M2	KCNQ2	CHRDL1
CNIH4	LIX1L	APBA1	KCTD15	CHRNA3
CNN3	LMX1A	APBB1	KNDC1	CHRNA4
COPA	LPGAT1	APH1B	LAMA5	CHRNB1
CPSF3L	LRRC8C	APP	LOXL2	CITED1
CTH	LRRN2	AQP11	LRDD	CKB
CTPS	MAN1C1	ARC	LSR	CLDN1
CTTNBP2NL	MANEAL	ARF5	LYN	CLDN11
DAP3	MAP3K19	ARFGAP3	MAP1B	CLIC5
DARS2	MCOLN3	ARG2	MAP3K11	CNIH3
DDOST	MFSD2	ARHGAP21	MAP3K9	CNTFR
DDX20	MFSD4	ARHGAP22	MEGF10	CNTNAP2
DDX59	MIXL1	ARHGAP26	MICAL1	COCH
DEGS1	MRPS15	ARHGDIG	MLF1	COL12A1
DEPDC1	NAV1	ARHGEF1	MLH1	COL13A1
DFFB	NBPF3	ARHGEF10	MLLT4	COL15A1
DHCR24	NFIA	ARHGEF17	MMP16	COL4A1
DHRS3	NGF	ARHGEF3	MOSPD3	COL4A3
DHX9	NOC2L	ARL10	MTL5	COL5A1
DIO1	NT5C1A	ARL4C	MYCN	COL9A2
DISC1	NTRK1	ARL4D	MYD88	CPE
DMAP1	OLFML2B	ARMC4	MYH10	CPT1A
DNAJC11	PADI2	ARMC7	MYL9	CRABP1
DNAJC16	PANK4	ARNT2	MYO3A	CRABP2
DNAJC8	PAX7	ARRB2	MYO6	CRHR1
DPH2	PCSK9	ARRDC4	NCKIPSD	CRHR2
DPM3	PDIK1L	ARSA	NCOA4	CRIP2
DR1	PDPN	ARSD	NENF	CSF1
DUSP12	PER3	ART5	NEO1	CTNND2
DUSP23	PEX14	ASCL1	NES	CXCL12
EFHD2	PHLDA3	ASNS	NFATC2IP	CXCL14
EFNA4	PIK3CD	ASRGL1	NOTCH3	CXCR4
EIF2B3	PLD5	ASS1	NPR2	CYP1A1
EIF2C1	PLEKHN1	ATBF1	NSD1	CYP24A1
EIF2C3	PODN	ATF7IP	NTNG1	CYP26A1
EIF2C4	POLR3GL	ATOH1	NUAK2	CYP26B1
EIF3I	POU3F1	ATOH8	NUMBL	CYP39A1
ELOVL1	PPIE	ATP10A	OBSL1	CYR61
ENAH	PRDM16	ATP12A	PALM	DAB1
ENO1	PRRX1	ATP1B2	PARVA	DAPK2
EPHA2	PTGER3	ATP5G2	PATZ1	DCDC2
EPRS	PTGFR	ATP6V1C2	PAWR	DES
EPS15	PTPRF	ATP8A2	PCSK5	DFNA5
ERMAP	PTPRU	ATP8B2	PDE9A	DFNB31
ETNK2	RAB7L1	ATP9A	PDGFC	DGAT1
ETV3	RAP1GAP	ATRN	PER1	DGKH
EXO1	RASSF5	ATRNL1	PEX7	DGKI
EXOC8	RBP7	AUTS2	PKN1	DGKZ
EXOSC10	RCC2	AXIN1	PLCG1	DKK1
F11R	RHOC	B3GALNT1	PLEKHG2	DKK2
FAM46B	RNF220	B3GAT1	PLK2	DKK3
FAM76A	RP11-488L18.5	B3GAT2	POMT1	DLL1
FBXO28	RP11-520H14.1	B3GNT5	PPAP2B	DLX2
FBXO6	RP4-631H13.4	B4GALNT2	PPL	DLX3
FGGY	RPA2	B4GALNT3	PPP1R9A	DLX4
FH	RSPO1	B4GALNT4	PPP2R5B	DLX5
FHL3	RUNX3	BAALC	PRDX2	DMRT1
FOXJ3	RYR2	BACE1	PRKACB	DMRT3
FUBP1	SAMD11	BACH2	PRKAR2B	DMRTA1
FUSIP1	SCP2	BAG2	PRKCQ	DNASE2
GADD45A	SEMA6C	BAIAP3	PSEN1	DNM3
GALNT2	SERTAD4	BARHL1	PTCH2	DNMT3A
GCLM	SKI	BARHL2	PTEN	DOC2A
GDAP2	SLC30A2	BARX2	PTK2	DOK1
GGPS1	SLC35F3	BBS5	PTPRG	DPYSL3
GLMN	SNFT	BCAR1	PTPRK	DPYSL4
GLTPD1	SOAT1	BCAR3	PTPRZ1	DPYSL5
GLUL	SPSB1	BCAS4	PVRL3	DRD1
GMEB1	ST6GALNAC5	BCL11A	PYCARD	DRD4
GNAI3	SYT2	BCL11B	QKI	DSCAML1
GNB1	SYT6	BCL2	RAB15	DUSP10
GNG4	TACSTD2	BCL9L	RAB24	DUSP4
GNG5	TAGLN2	BCR	RAB32	DUSP6
GNPAT	TARBP1	BIK	RAB36	DZIP1
GNRHR2	TDRD5	BIVM	RAB39	EBF3
GPATCH3	TFAP2E	BLVRA	RAB39B	ECE1
GPR3	TGFBR3	BMP2K	RAB3B	EDNRB
H3F3A	TMCO4	BMP3	RAC3	EFNA1
H6PD	TMEM51	BMP4	RALGPS2	EFNA2
HAX1	TMEM54	BMP6	RASL10B	EFNA3
HCN3	TMEM63A	BMP7	RASL12	EFNA5
HDGF	TNFRSF18	BMP8B	RASSF8	EFNB2
HECTD3	TP73	BMPER	RBPMS	EFNB3
HHLA3	TRAPPC3	BMPR1A	RDX	EGFR
HIAT1	TRIM17	BMPR1B	RECQL4	EGR1
HIPK1	TSSK3	BNC1	RHBDL1	EIF5A2
HIST2H2AB	TTC13	BOC	RHEB	ELAVL3
HIST2H2AC	USF1	BOLA1	RHOF	ELMO1
HIST2H2BE	VAV3	BRSK2	RHOQ	EOMES
HMGN2	WDR8	BRUNOL6	RHOV	EPHA10
HNRNPU	WDTC1	BRWD1	RHPN2	EPHA4
HOOK1	WNT3A	BSCL2	ROR1	EPHA7
HPDL	WNT4	BSG	RPL39L	EPHA8
HS2ST1	ZC3H12A	BTBD11	RRAS2	EPHB3
HSD17B7	ZNF436	BTG2	S1PR2	EPHB6
HSPG2	ADAM12	BTG3	SCRIB	EPO
ICMT	ADAMTS14	C10orf107	SDC1	EPS8
IGSF8	ADARB2	C10orf125	SDC4	ESR1
IGSF9	ADRA2A	C10orf137	SEMA4C	ESR2
IL28RA	ADRB1	C10orf35	SEMA5A	ETS1
INADL	AIFM2	C10orf47	SEMA6A	EVI1
IPO13	AL359832.33	C10orf57	SERPINB9	EVX1
IQGAP3	AL390294.19	C10orf93	SFXN5	EYA4
IQWD1	AL391005.9	C11orf45	SH2B3	F2R
IRF2BP2	AL731567.6	C11orf70	SIX4	FABP5
ISG20L2	ALOX5	C13orf15	SLC12A4	FAM3B
IVNS1ABP	ANXA11	C13orf33	SLC12A7	FARP1
JMJD2A	ARHGAP21	C14orf45	SLC25A4	FBLIM1
JMJD4	ARHGAP22	C16orf45	SLC38A1	FEV
JTB	BMI1	C16orf46	SLC39A3	FEZF2
KCNK1	BNIP3	C16orf67	SLC44A2	FGF19
KHDRBS1	BUB3	C16orf72	SLC4A8	FGF22
KIAA0090	C10orf116	C16orf86	SMAD1	FGF3
KIAA0319L	C10orf125	C17orf67	SMTN	FGF8
KIAA0494	C10orf57	C17orf91	SNAP25	FGFR3
KIAA0562	C10orf88	C18orf1	SNX9	FIBCD1
KIF14	CACNB2	C18orf43	SPSB2	FLI1
KIF1B	CAMK1D	C18orf54	STEAP2	FLT1
KLHL12	CCDC3	C19orf26	STK25	FLT3
KLHL21	CHAT	C1orf101	STMN3	FOXA1
KRTCAP2	CHST3	C1orf102	SYNGR1	FOXA2
KTI12	CNNM1	C1orf216	TCF7L1	FOXC1
LAMC1	CNNM2	C1orf88	TEKT2	FOXD3
LASS2	COL13A1	C1orf91	TGFBR2	FOXE1
LBR	COMMD3	C1QTNF1	THBS1	FOXF1
LEPRE1	CPXM2	C20orf112	TIMP2	FOXF2
LEPROT	CXCL12	C20orf133	TLE4	FOXN4
LIN28	CYP26A1	C20orf149	TNFRSF10B	FOXQ1
LMNA	CYP26C1	C20orf39	TPBG	FST
LMO4	DKK1	C21orf59	TPM1	FYN
LRIG2	DPYSL4	C21orf63	TPM2	FZD4
LRP8	DRD1IP	C2orf39	TPM4	FZD8
LRRC41	DUSP	C2orf52	TRAF5	GABRA2
LRRC42	EBF3	C3orf15	TRIB2	GABRA4
LRRC47	ECHS1	C3orf52	TRIM13	GABRB2
LYPLAL1	EGR2	C3orf59	TRPS1	GAD1
LZIC	EMX2	C3orf72	TSPAN12	GAD2
MAD2L2	ENTPD7	C5orf35	TUBB3	GADD45G
MAGOH	FAM53B	C5orf38	UACA	GAL
MAN1A2	FGF8	C5orf39	UBE2C	GALR1
MCL1	FOXI2	C6orf145	UCHL1	GALR2
MED8	FRAT1	C6orf150	VEGFB	GAS1
MEF2D	GAD2	C6orf152	VWA1	GATA3
MFN2	GATA3	C7orf11	WFS1	GATA4
MGST3	GBF1	C7orf31	WWTR1	GBX2
MIER1	GDF10	C7orf63	YOD1	GCHFR
MKNK1	GFRA1	C8orf55	ZCCHC11	GDNF
MLLT11	GPR26	C9orf125	ZMYM4	GDPD5
MORN1	GRK5	C9orf127	ZNF160	GFI1
MPZL1	H2AFY2	C9orf75	ZNF256	GFRA1
MRPL20	HHEX	CA4	ZNF296	GGN
MRPL37	HTR7	CA8	ZNF35	GJB2
MRPL55	HTRA1	CABP1	ZNF8	GJB3
MRPS14	IFIT5	CABP7		GJC1
MRTO4	IL15RA	CACNA1A		GJD2
MSTO1	INA	CACNA1C		GLRB
MTF2	KAZALD1	CACNA1D		GNA14
MTHFR	KCNIP2	CACNA1G		GNAI1
MTR	KCNMA1	CACNA1H		GNAL
MTX1	LIPA	CACNA2D1		GNAO1
MUC1	LRRC20	CACNB1		GNG13
MYCBP	MAP3K8	CACNB2		GNG8
NCDN	MKX	CACNB3		GPR150
NCSTN	MMS19	CACNB4		GPR155
NECAP2	MXI1	CACNG2		GPR157
NEK2	NEBL	CACNG4		GPR37
NENF	NEURL	CADM1		GPR39
NES	NEUROG3	CADM3		GPR6
NFYC	NFKB2	CADPS		GPR63
NMNAT1	NKX6-2	CALCA		GPR78
NOL9	NPM3	CAMK1D		GPR83
NSL1	NRP1	CAMK2B		GPRC5C
NSUN4	OGDHL	CAMK2D		GPRIN1
NTNG1	PAOX	CAMK4		GRASP
NUAK2	PARD3	CAMTA2		GRB10
NUDC	PAX2	CAPG		GREM1
NUF2	PCDH21	CAPN14		GRIA2
NUP133	PCGF5	CARTPT		GRIK3
NVL	PDLIM1	CAV1		GRIN2A
ORC1L	PFKFB3	CBR3		GRIN2C
OSBPL9	PFKP	CBS		GRIN3A
OTUD7B	PHYHIPL	CCDC102A		GSTM3
PABPC4	PIP5K2A	CCDC3		GUCY1A2
PARK7	PITX3	CCDC34		HAND1
PARP1	PLAU	CCDC42		HAND2
PARS2	PPA1	CCDC62		HCK
PEA15	PPP1R3C	CCDC8		HES4
PEX10	PRKG1	CCDC9		HES6
PEX11B	PRLHR	CCNA1		HEY2
PFKFB2	PTPRE	CCND1		HHEX
PGD	RBP4	CCND2		HIC1
PHF13	RET	CCNF		HLX
PIAS3	RGS10	CCNJ		HOXA1
PIGM	SEC31B	CCNJL		HOXA13
PIGV	SFRP5	CCNO		HOXA4
PIP5K1A	SLC16A12	CCRK		HOXA5
PKN2	SLC18A2	CD200		HOXA9
PLEKHO1	SLC18A3	CD24L4		HOXB13
PLK3	SLIT1	CD276		HOXB9
PMVK	SORCS3	CD320		HOXC12
PNRC2	SPAG6	CD44		HOXD1
POGK	STK32C	CD59		HOXD11
POGZ	SVIL	CD70		HOXD13
POLR3C	TCERG1L	CD81		HRK
POMGNT1	TLL2	CD8A		HSD11B2
POU2F1	TMEM20	CD9		HSPA2
PPAP2B	TSPAN15	CDC14B		HTATIP2
PPCS	UBTD1	CDC16		HTR1B
PPIH	UNC5B	CDC25B		HTR1E
PPOX	UTF1	CDC42BPB		HTR6
PPP1R12B	VAX1	CDC42EP3		HTR7
PPP1R15B	VENTX	CDCA7L		HTRA1
PPP1R8	VWA2	CDCP1		ICAM1
PPP2R5A	ZEB1	CDH1		IGF2
PQLC2	ZMYND11	CDH11		IGFBP3
PRCC	ZNF32	CDH2		IGFBP7
PRDX1	ZNF503	CDK5R1		IL15
PRDX6	ABCC8	CDK5R2		IL17RA
PRKAA2	ABCG4	CDKL2		INA
PRKAB2	ABTB2	CDKN1C		INHBB
PRKACB	AC079296.5	CDKN2A		IRF4
PRKCZ	ADAMTS15	CDKN2B		IRF8
PRPF3	ADM	CDO1		IRS2
PRPF38A	AHNAK	CDS1		IRX3
PRPF38B	ALX4	CDX2		IRX4
PSMA5	AMPD3	CEBPA		IRX5
PSMB2	AP002448.3	CEBPD		ITGA11
PSMB4	AP006284.2	CELSR3		ITGA2
PSRC1	APBB1	CENPB		ITGA4
PTBP2	APLP2	CERCAM		ITGB3
PTCH2	ARHGEF17	CHAC1		ITGB4
PTGFRN	ARNTL	CHD5		ITGB8
PTP4A2	BAD	CHDH		ITPKB
PTPN14	BARX2	CHFR		JUNB
PUM1	BDNF	CHGB		KAL1
PUSL1	BTG4	CHN1		KCNA1
PYGO2	C11orf35	CHN2		KCNC4
RAB3B	C11orf45	CHRDL1		KCNH1
RAB3GAP2	C11orf88	CHRNA3		KCNH2
RABIF	C2CD2L	CHRNA4		KCNIP1
RAD54L	CADM1	CHRNB1		KCNJ8
RAG1AP1	CALCA	CIB2		KCNK10
RALGPS2	CALCB	CIC		KCNMA1
RASAL2	CCDC85B	CILP2		KCNQ1
RBM15	CCND1	CITED1		KCNQ3
RBMXL1	CD44	CITED4		KCNQ5
RCAN3	CDC42EP2	CKAP4		KHDRBS3
RER1	CDKN1C	CKB		KIFC3
RERE	CHST1	CLDN1		KISS1R
RGS2	COX8A	CLDN11		KITLG
RLF	CPT1A	CLDN7		KLF4
RNF19B	CRY2	CLGN		KLF5
RNPEP	DCHS1	CLIC5		LAMA1
ROR1	DGKZ	CLMN		LBX1
RP1-144C9.2	DKK3	CLSTN1		LEF1
RP11-179G5.1	DRD2	CLSTN2		LGALS3
RP11-20O24.2	DRD4	CMTM3		LHX1
RP11-235D19.2	DSCAML1	CNIH2		LHX4
RP11-269F19.4	DUSP8	CNIH3		LHX5
RP11-275I14.2	E2F8	CNN3		LHX6
RP11-302M6.3	ESAM	CNTFR		LHX9
RP11-465N4.2	ESRRA	CNTNAP2		LIPA
RP11-544M22.3	ETS1	COBLL1		LIPG
RP11-544M22.4	FAM89B	COCH		LMX1A
RP11-8J9.1	FGF4	COL12A1		LMX1B
RP4-604K5.1	FIBP	COL13A1		LOX
RP4-654H19.2	FLI1	COL14A1		LRP12
RP4-665N4.5	FOSL1	COL15A1		LRP2
RP5-882O7.1	FUT4	COL23A1		LTBP2
RP5-882O7.4	FZD4	COL27A1		LTBP3
RPAP2	GAB2	COL4A1		MAPK11
RPL5	GAL	COL4A3		MAPK12
RPS6KA1	GALNTL4	COL5A1		MAPK13
RPS8	GDPD5	COL6A1		MAPT
RRP15	GLB1L2	COL6A2		MATK
RSBN1	GLB1L3	COL7A1		MATN3
S100A13	GPR137	COL9A2		MBP
S100PBP	GPR83	COL9A3		MCAM
SARS	GUCY1A2	CORO2A		MCOLN3
SASS6	HRAS	CPE		MDFI
SCARNA1	HTATIP2	CPEB4		MDK
SCMH1	IGF2	CPNE2		MERTK
SCNN1D	IGF2AS	CPNE5		MICB
SCYL3	INPPL1	CPNE7		MITF
SDF4	KCNJ5	CPT1A		MLPH
SERBP1	KCNK4	CPT1C		MLXIPL
SESN2	KLHL35	CR2		MME
SF3A3	LRRC56	CRABP1		MMP2
SFPQ	LTBP3	CRABP2		MMS19
SFRS4	MAPK8IP1	CRAMP1L		MPP3
SFT2D2	MCAM	CRELD1		MSI1
SH3BGRL3	ME3	CREM		MSX1
SH3GLB1	MICAL2	CRHR1		MSX2
SHC1	MTA2	CRHR2		MT3
SLC16A1	MYOD1	CRIP1		MTNR1A
SLC19A2	NAV2	CRIP2		MX1
SLC25A24	NELL1	CRISPLD1		MYH11
SLC25A33	NPAS4	CRLF1		MYOCD
SLC25A44	NRGN	CRYBA2		MYOD1
SLC27A3	NRXN2	CSF1		NAV2
SLC2A1	OAF	CSRP2BP		NDRG4
SLC30A1	OTOG	CST3		NEDD4
SLC35A3	OVOL1	CTDSPL		NEFH
SLC35D1	P2RY2	CTGF		NELL1
SLC45A3	PAX6	CTNND2		NEURL
SLC6A9	PDE3B	CTSC		NEUROG1
SMAP2	PHLDA2	CTSL1		NEUROG2
SMG5	PHOX2A	CTSL2		NEUROG3
SMG7	PRDX5	CTSZ		NFATC1
SNORD46	RAB3IL1	CUX2		NGF
SNORD55	RASGRP2	CXCL12		NGFR
SNRPE	RASSF7	CXCL14		NKD1
SNX27	RELT	CXCL2		NKD2
SPATA1	RNF26	CXCR4		NKX2-2
SPATA21	RTN4RL2	CYB561		NKX2-5
SPATA6	SCN3B	CYB5A		NKX2-8
SPEN	SCUBE2	CYBRD1		NKX6-1
SRM	SIAE	CYP1A1		NMU
SRP9	SLC1A2	CYP24A1		NOG
SRRM1	SLC35C1	CYP26A1		NPAS2
SSBP3	SLC43A1	CYP26B1		NPAS3
SSU72	SNX19	CYP2S1		NPB
SSX2IP	SPA17	CYP39A1		NPPC
ST3GAL3	SPON1	CYP4X1		NPTX1
ST6GALNAC3	SSSCA1	CYP51A1		NPTX2
ST7L	ST14	CYP7B1		NR2E1
STIL	STIM1	CYR61		NR2F2
STK40	SYT12	CYYR1		NRCAM
STMN1	SYT9	DAB1		NRG1
STX6	TIGD3	DAP		NRP1
STXBP3	TMEM151A	DAPK1		NRP2
SYF2	TRPC6	DAPK2		NTN1
TADA1L	USH1C	DBN1		NTN4
TARDBP	USP2	DCBLD2		NTRK2
TAS1R1	VSIG2	DCDC2		NTRK3
TATDN3	VWCE	DDAH2		NXPH3
TCEB3	WIT1	DEGS2		NXPH4
TEKT2	WNT11	DENND2C		OCA2
TESK2	WT1	DES		OLFM1
TFB2M	YIF1A	DFNA5		OLIG2
THBS3	ZBTB16	DFNB31		ONECUT1
THEM4	AC005908.1	DGAT1		ONECUT2
TIMM17A	AC139768.14	DGKH		OPRK1
TIPRL	ACCN2	DGKI		OSMR
TMED5	ACVR1B	DGKZ		OSR1
TMEM183A	ALX1	DHRS3		OTP
TMEM206	AMDHD1	DKK1		OVOL1
TMEM39B	ANKRD13A	DKK2		OVOL2
TMEM48	AQP5	DKK3		P2RY2
TMEM50A	ASCL1	DKKL1		PAG1
TMEM52	B3GNT4	DLEC1		PAPPA
TMEM53	B4GALNT1	DLL1		PAQR5
TMEM59	B4GALNT3	DLX2		PAQR8
TMEM77	BCL7A	DLX3		PARD3
TMEM79	BTBD11	DLX4		PAX2
TMEM9	C12orf23	DLX5		PAX5
TNFRSF25	CACNA1C	DMRT1		PAX7
TOMM20	CACNB3	DMRT3		PCDH1
TOR1AIP1	CCDC38	DMRTA1		PCDH21
TOR1AIP2	CCDC92	DNAJB6		PCGF2
TOR3A	CCND2	DNAJC18		PCSK9
TP53BP2	CDK4	DNAJC22		PDE10A
TPR	CHPT1	DNASE2		PDE3A
TPRG1L	CSAD	DNM3		PDE3B
TRAF5	CTDSP2	DNMT3A		PDE8B
TRIM33	CUX2	DOC2A		PDGFB
TRIM45	DNAJC22	DOCK9		PDLIM3
TRIM46	DTX1	DOK1		PDPN
TRIM62	DUSP6	DOK7		PDX1
TROVE2	EFCAB4B	DPYS		PENK
TSNAX	ELK3	DPYSL3		PER3
TTC4	EPS8	DPYSL4		PGF
TTF2	FAM119B	DPYSL5		PHLDA2
TUFT1	FBXL14	DRD1		PHLDA3
UAP1	FKBP4	DRD1IP		PHOX2A
UBAP2L	FOXN4	DRD4		PIK3CD
UBE2J2	FZD10	DSC2		PITX3
UBE2Q1	GIT2	DSC3		PKDREJ
UBQLN4	GLS2	DSCAML1		PKP1
UBR4	GPRC5A	DSG2		PLCB1
UCHL5	GRASP	DTNB		PLEK2
UCK2	HEBP1	DUOXA1		PLEKHG6
UQCRH	HOXC4	DUOXA2		PLXNC1
UROD	HOXC6	DUSP10		POU2F3
USP1	HRK	DUSP15		POU3F2
USP21	ITGA5	DUSP23		POU4F1
USP33	KCNA1	DUSP26		POU4F2
USP48	KCNA5	DUSP4		POU4F3
UTP11L	KCNA6	DUSP6		PPARA
VAMP3	KCNH3	DYRK1B		PPARG
VWA1	KITLG	DZIP1		PPIC
WARS2	KRT7	E2F7		PPP1R16B
WASF2	LGR5	EBF3		PPP1R1A
WDR3	LHX5	ECE1		PRDM12
WDR42A	2011-03-09	ECHDC3		PRDM16
WDR47	METTL1	EDIL3		PRKAG2
WDR77	MMP17	EDNRB		PRKCA
WDR78	MSRB3	EFCBP2		PRKCE
XKR8	NDUFA4L2	EFEMP2		PRKCH
XPR1	NOS1	EFHA2		PRKG1
YARS	NT5DC3	EFNA1		PRRX1
YBX1	NTN4	EFNA2		PRRX2
YIPF1	NXPH4	EFNA3		PSD2
YOD1	PLEKHG6	EFNA5		PTF1A
YRDC	PLXNC1	EFNB2		PTGDR
YY1AP1	POLE	EFNB3		PTGER2
Z99127.2	PPP1R1A	EGFL9		PTGER3
Z99572.1	PRICKLE1	EGFLAM		PTGFR
ZBTB17	PRMT8	EGFR		PTGS2
ZBTB40	PRPH	EGLN3		PTPRE
ZBTB48	PTPRO	EGR1		PTPRM
ZCCHC11	PXMP2	EIF4E3		PTPRN
ZCCHC17	RAD9B	EIF5A2		PTPRT
ZMYM4	RFX4	ELAVL3		PTPRU
ZMYM6	RILPL2	ELMO1		PYGO1
ZMYND12	SHMT2	ELOVL4		RAB20
ZNF281	SLC2A13	ELOVL5		RAB3C
ZNF326	SLC5A8	EMILIN2		RAB6B
ZNF496	SOCS2	EML1		RAB7L1
ZNF643	SSPN	EMP2		RALGDS
ZNF644	ST8SIA1	EMX1		RAMP2
ZNF670	SUDS3	ENAH		RAMP3
ZNF672	SYT10	ENO2		RASD1
ZNF687	TAOK3	ENPP1		RASD2
AC016542.11	TBX3	ENTPD3		RASEF
AC022400.9	TBX5	ENTPD8		RASGRF1
ACBD5	TCHP	EOMES		RASGRF2
ADAM8	TEAD4	EPB41L4B		RASSF1
ADK	TENC1	EPHA10		RASSF5
AFDC1	TESC	EPHA4		RBP4
AL157400.8	TMEM117	EPHA7		RELN
AL355355.25	TMEM132D	EPHA8		RERG
AL512598.11	TRHDE	EPHB3		RET
AL512631.11	TSPAN8	EPHB4		RGS11
ALDH18A1	TSPAN9	EPHB6		RGS7
ANKRD16	VDR	EPO		RHOB
ANKRD26	VPS29	EPS8		ROCK1
ANUBL1	VPS37B	EPSTI1		ROPN1L
AP3M1	WIF1	ERBB2		ROR2
ARHGAP12	WNT1	ERBB3		RORA
ARHGAP19	YAF2	ERC2		RPS6KA2
ARL3	ZNF664	ERRFI1		RRAD
ARL5B	ZNF740	ESAM		RSPO1
ARMC4	ABCC4	ESR1		RSPO3
ARMETL1	ARHGEF7	ESR2		RTN4RL2
ASB13	ATP12A	ETS1		RXFP3
ATP5C1	ATP8A2	EVC		RYR2
AVPI1	BIVM	EVI1		S100A6
BAG3	C13orf15	EVX1		S1PR5
BAMBI	C13orf31	EYA4		SALL1
BCCIP	CCDC122	F2R		SALL3
BMPR1A	CCNA1	FA2H		SARM1
BTAF1	CDX2	FABP5		SCNN1G
BTRC	COL4A1	FADS1		SDCBP
C10orf107	COL4A2	FADS2		SECTM1
C10orf111	DOCK9	FAH		SEMA7A
C10orf119	EDNRB	FAIM		SFRP1
C10orf137	EFNB2	FAM105A		SFRP2
C10orf22	EPSTI1	FAM111B		SFRP4
C10orf47	FAM123A	FAM114A1		SFRP5
C10orf59	FAM70B	FAM118A		SGCB
C10orf82	FARP1	FAM124A		SH3GL2
C10orf93	FGF9	FAM125A		SH3GL3
C10orf95	FLT1	FAM131B		SIM2
CAMK2G	FLT3	FAM133A		SIX1
CBARA1	GAS6	FAM150A		SIX2
CCAR1	GJB2	FAM164A		SIX3
CCDC109A	GPC5	FAM174B		SIX6
CCDC6	GPR12	FAM19A4		SKAP2
CHCHD1	GPR180	FAM20A		SLC17A7
CISD1	GSH1	FAM3B		SLC18A2
COMTD1	HS6ST3	FAM43B		SLC1A1
COPEB	IL17D	FAM55C		SLC1A4
CPEB3	KCTD12	FAM57A		SLC2A4
CREM	KDELC1	FAM59A		SLC2A8
CSGALNACT2	KL	FAM62C		SLC30A4
CSTF2T	KLF5	FAM70B		SLC6A2
CTBP2	MLNR	FAM78A		SLC6A4
CUL2	PCDH8	FAM84A		SLC8A3
DCLRE1A	POU4F1	FAM84B		SLIT1
DCLRE1C	RAB20	FARP1		SLIT2
DDIT4	SLC15A1	FBLIM1		SLIT3
DDX21	SLC46A3	FBLN5		SLITRK3
DDX50	SLITRK5	FBP1		SLITRK5
DHTKD1	SOX1	FBXL14		SMAD7
DNAJC1	SOX21	FBXL15		SMARCD3
DNAJC9	VGCNL1	FBXL16		SMO
DUSP13	ZIC2	FBXL2		SMPD3
ECD	AC007160.3	FBXO15		SNCAIP
ECHDC3	ADCY4	FBXO30		SNTA1
EIF3S10	AL049775.2	FBXO32		SNX18
EPC1	AL049836.3	FBXO6		SNX19
FAM149B1	AL928654.1	FBXW9		SNX22
FAM35A	AMN	FEV		SNX32
FBXL15	BCL11B	FEZF2		SOCS2
FBXO18	BMP4	FGF19		SORCS3
FGFR2	C14orf179	FGF22		SOX14
FRAT2	C14orf39	FGF3		SOX7
FUT11	C14orf4	FGF8		SOX9
GDI2	C14orf43	FGFR2		SPATA18
GLUD1	C14orf80	FGFR3		SPDYA
GOT1	C14orf83	FGFR4		SPHK1
GSTO1	CKB	FHOD3		SPOCK1
GSTO2	COCH	FIBCD1		SPRY4
HECTD2	CRIP1	FKBP1B		SPSB4
HELLS	CRIP2	FLI1		SRD5A2
HERC4	DACT1	FLNC		SSPN
HPS1	DEGS2	FLT1		SSTR1
HPS6	DIO3	FLT3		SSTR2
HSPA14	DLK1	FNBP1		SSTR4
IDE	ESR2	FNDC4		ST6GAL2
IDI1	FBLN5	FOXA1		ST8SIA2
INPP5A	FLRT2	FOXA2		STAC2
INPP5F	FOS	FOXA3		STBD1
IPMK	FOXA1	FOXB1		SVIL
ITGB1	GCH1	FOXC1		SYK
KIAA0913	GPR135	FOXD1		SYN2
KIAA1279	GSC	FOXD3		T
KIF11	HHIPL1	FOXE1		TAC1
KIF5B	INSM2	FOXF1		TAGLN2
KIN	JAG2	FOXF2		TBX2
KNDC1	KCNK10	FOXN4		TBX20
LCOR	KCNK13	FOXO1A		TBX3
LDB1	KLHDC1	FOXQ1		TBXA2R
LHPP	LGALS3	FRMD5		TCF7
LIPJ	LRFN5	FRMD6		TEAD4
LOXL4	LTBP2	FRMPD1		TERT
LZTS2	MARK3	FRY		TFAP2C
2011-03-05	MTA1	FST		TFCP2L1
2011-03-08	NDRG2	FSTL1		TFPI2
MARVELD1	NID2	FUT11		TGFBI
MASTL	NKX2-8	FUT4		THBD
MGEA5	NPAS3	FXYD6		THBS4
MGMT	NRL	FYN		TIAM1
MINPP1	PGF	FZD4		TIMP3
MKI67	PIGH	FZD6		TLE2
MORN4	PLEK2	FZD7		TLL2
MRPL43	POLE2	FZD8		TLX2
MRPS16	PPP1R13B	G0S2		TLX3
MSRB2	PRIMA1	GABBR1		TNFRSF10A
MYO3A	PRKCH	GABRA2		TNFRSF10D
NANOS1	PTGDR	GABRA4		TNFRSF11A
NCOA4	PTGER2	GABRB2		TNFSF9
NDST2	RTN1	GAD1		TP73
NDUFB8	SAMD4A	GAD2		TPD52L1
NHLRC2	SIX1	GADD45G		TRAF3
NOLC1	SIX6	GAL		TRH
NRBF2	SLC8A3	GALNT12		TRPA1
NSMCE4A	SMOC1	GALNT14		TSPAN2
OBFC1	SSTR1	GALNTL4		TSSK3
OPTN	STXBP6	GALR1		TUBB2B
P4HA1	TGFB3	GALR2		TWIST1
PANK1	TMEM121	GAMT		UCN
PAPSS2	TMEM179	GAS1		UNC5A
PBLD	TRAF3	GAS8		UNC5C
PCGF6	TRIM9	GATA3		USH1C
PDCD11	VASH1	GATA4		USH1G
PDCD4	VSX2	GATA5		UTF1
PEO1	WDR21A	GBX2		VASH1
PGAM1	AC011330.6	GCA		VASH2
PHYH	ACAN	GCHFR		VAV3
PI4K2A	ADAMTS17	GDF11		VAX2
PLXDC2	ADAMTSL3	GDF7		VDR
POLL	ALDH1A2	GDNF		VEGFC
POLR3A	ALDH1A3	GDPD5		VENTX
PPIF	ANP32A	GFI1		VGF
PPRC1	ATP10A	GFOD1		VGLL2
PRKCQ	AVEN	GFPT2		VIPR2
PRPF18	B2M	GFRA1		VLDLR
PRTFDC1	BNC1	GGH		VWC2
PSD	BRUNOL6	GGN		WIF1
PTEN	CATSPER2	GJB2		WNK2
PTER	CHRNA3	GJB3		WNT1
PWWP2B	CRABP1	GJC1		WNT10A
RAB18	CTSH	GJD2		WNT2
RBM17	CYFIP1	GLB1L2		WNT3
RP11-366I13.3	CYP1A1	GLB1L3		WNT3A
RP11-369J21.6	DAPK2	GLDC		WNT5A
RP11-402L1.1	DUOX1	GLRB		WNT7A
RP11-455B2.3	DUOX2	GLS2		WNT7B
RP11-500G10.4	DUOXA1	GLUL		WNT9B
RP11-508N22.5	DUOXA2	GMPR		YBX2
RP11-529I10.4	FAM103A1	GNA11		ZAR1
RPP38	FBN1	GNA12		ZBTB16
RPS24	FOXB1	GNA14		ZEB1
RSU1	GCHFR	GNAI1		ZFP37
SAMD8	GJD2	GNAL		ZNF287
SAR1A	GREM1	GNAO1		ZP3
SCD	HCN4	GNB4
SEC23IP	HISPPD2A	GNG13
SEPHS1	IDH2	GNG8
SFXN2	IMP3	GNMT
SFXN4	ITGA11	GOT1
SGMS1	ITPKA	GPATCH1
SIRT1	KIAA1199	GPC1
SLC25A16	KLF13	GPC5
SMC3	LYSMD4	GPC6
SORBS1	MAGEL2	GPM6A
SSH3BP	MAP1A	GPR125
SUPV3L1	MEGF11	GPR150
SUV39H2	MEIS2	GPR155
TAF5	MESDC1	GPR157
TCF7L2	MESP1	GPR160
TET1	MYO5A	GPR176
TFAM	NEDD4	GPR37
TIAL1	NEIL1	GPR39
TNKS2	NIPA1	GPR6
TRIM8	NR2F2	GPR63
TRUB1	NTRK3	GPR78
TTC18	OCA2	GPR83
TUBGCP2	ONECUT1	GPRC5C
TXNL3	PAQR5	GPRIN1
UBE2D1	PARP16	GPX3
UPF2	PCSK6	GRASP
UROS	PDE8A	GRB10
USMG5	PKM2	GRB14
USP6NL	PYGO1	GREM1
VCL	RASGRF1	GRIA2
VIM	RASGRP1	GRIK3
VPS26A	RHCG	GRIN2A
VTI1A	RPP25	GRIN2C
WAPAL	SCAND2	GRIN3A
WDR37	SEMA7A	GSH1
YME1L1	SH3PX3	GSH2
ZDHHC6	SLC27A2	GSTM3
ZNF25	SLC30A4	GSTM4
ZNF33B	SLCO3A1	GSTO2
ZNF37A	SMAD3	GSTP1
ZNF485	SMAD6	GTF2IRD1
ZNF511	SNX22	GUCY1A2
AASDHPPT	SQRDL	GULP1
AC009532.9	ST8SIA2	GYG2
AC026250.16	SV2B	H2AFY2
ACAD8	TLE3	HAAO
ACTN3	TM6SF1	HAND1
ADRBK1	TP53BP1	HAND2
AL135932.7	ABCA3	HAP1
ANKRD42	AC009019.10	HAPLN3
ANKRD49	AC025284.4	HAS3
AP000580.6	AC026461.11	HBEGF
AP001187.11	AC120498.2	HCG4P8
AP001462.3	AC130454.2	HCK
AP003110.2	ADAMTS18	HDAC10
AP006287.2	ADCY9	HDAC11
AP006621.1	AGRP	HDHD3
AP006623.1	AL023882.4	HEBP1
AP2A2	ARHGDIG	HERC3
APIP	ATBF1	HERC5
ARCN1	BAIAP3	HES2
ARFGAP2	BCL7C	HES4
ARFIP2	C16orf44	HES6
ART1	C16orf7	HEY2
ART5	CA7	HHEX
ASRGL1	CCDC78	HIC1
ATM	CDH11	HIF3A
B3GAT3	CDH3	HIST1H2BJ
B4GALNT4	CDH8	HLA-A
BACE1	CES2	HLA-F
BANF1	CKLF	HLTF
BCL9L	COTL1	HLX
BET1L	CPNE2	HMGA2
BIRC2	CPNE7	HMGN3
BRMS1	CRAMP1L	HMHA1
BRSK2	CTF1	HNT
BSCL2	DEF8	HOMER1
BUD13	DOC2A	HOOK1
C11orf10	DOK4	HOXA1
C11orf24	EXOC3L	HOXA13
C11orf30	FA2H	HOXA4
C11orf46	FAM65A	HOXA5
C11orf48	FAM96B	HOXA9
C11orf54	FBXL16	HOXB13
C11orf61	FBXL8	HOXB9
C11orf67	FHOD1	HOXC12
C11orf68	FOXC2	HOXC8
C11orf70	FOXF1	HOXD1
C11orf71	GFER	HOXD11
C11orf79	GRIN2A	HOXD13
C11orf83	HAGHL	HPCA
C2CD3	HBA1	HPDL
CAPN1	HBQ1	HPSE
CAPRIN1	HS3ST2	HR
CARS	HSD11B2	HRK
CAT	HSDL1	HS3ST1
CBL	HSF4	HS3ST3A1
CCDC34	IFT140	HS3ST3B1
CCDC82	IRF8	HS6ST3
CCDC83	IRX3	HSD11B1L
CCDC87	IRX5	HSD11B2
CCDC90B	KIFC3	HSD17B12
CCS	KREMEN2	HSD17B7
CD81	LITAF	HSD17B8
CDCA5	LRRC50	HSPA2
CDK2AP2	METRN	HTATIP2
CDON	MMP2	HTR1B
CEP57	MMP25	HTR1E
CFL1	MPHOSPH6	HTR6
CHCHD8	MT1A	HTR7
CHKA	MT1E	HTRA1
CKAP5	MT1F	HTRA3
CLNS1A	MT1X	ICA1
CLPB	MT3	ICA1L
CNGA4	MTHFSD	ICAM1
CNIH2	MYH11	ID4
COPB1	NDRG4	IDH2
CORO1B	NETO2	IFI30
CREBZF	NKD1	IGF2
CTR9	NOL3	IGF2AS
CTSC	NOXO1	IGF2BP1
CTSD	PAQR4	IGF2BP2
CTTN	PDIA2	IGFBP2
CUGBP1	PLLP	IGFBP3
CWC15	RAB40C	IGFBP4
CYB5R2	RGS11	IGFBP7
CYBASC3	RRAD	IGSF21
CYP2R1	SALL1	IGSF3
DAK	SCNN1B	IHH
DCDC1	SCNN1G	IL12A
DCPS	SLC6A2	IL15
DCUN1D5	SLC9A5	IL17D
DDB1	SMPD3	IL17RA
DDB2	SOX8	INA
DDX10	SULT1A1	INADL
DDX6	SYNGR3	INHBB
DEAF1	SYT7	INSM2
DHCR7	TAOK2	IQCC
DNAJC4	TBC1D24	IQSEC1
DPAGT1	TBL3	IRF4
DPF2	TK2	IRF7
DRAP1	TPPP3	IRF8
EED	TRADD	IRS2
EEF1G	VAC14	IRX3
EFEMP2	WWOX	IRX4
EHD1	Z97652.9	IRX5
EIF1AD	ZFPM1	ITGA11
EIF3M	ZNF276	ITGA2
EIF4G2	AATF	ITGA4
EXT2	ABCA5	ITGB3
FADD	ABCC3	ITGB4
FADS1	ABR	ITGB8
FADS2	AC073624.1	ITPKB
FAM111B	AC090610.6	ITPR3
FAM118B	AC100793.8	JAKMIP1
FAM160A2	ACE	JAM3
FAM76B	ADAM11	JPH1
FANCF	ADORA2B	JPH3
FAR1	ALOX12	JRKL
FAU	ALOX15	JUNB
FDX1	ATP2A3	JUP
FEN1	B4GALNT2	KAL1
FKBP2	C17orf59	KANK1
FOXRED1	C17orf67	KANK3
FRMD8	C17orf82	KANK4
FXC1	C1QL1	KBTBD7
GAL3ST3	C1QTNF1	KCNA1
GANAB	CA4	KCNB1
GNG3	CACNA1G	KCNC1
GSTP1	CACNG4	KCNC4
GTF2H1	CAMTA2	KCNF1
H19	CANT1	KCNG1
H2AFX	CBX4	KCNG3
HNT	CBX8	KCNH1
HPS5	CCDC56	KCNH2
HSD17B12	CCDC57	KCNIP1
HSPA8	CCR10	KCNJ10
HYOU1	CHAD	KCNJ11
IGHMBP2	CNTD1	KCNJ3
INTS5	CNTNAP1	KCNJ4
IPO7	COL1A1	KCNJ6
IRF7	CORO6	KCNJ8
JAM3	CPD	KCNK1
JMJD2D	CRHR1	KCNK10
JRKL	CXCL16	KCNK12
KAT5	CYB5D1	KCNK15
KBTBD3	CYGB	KCNK5
KBTBD4	DGKE	KCNK9
KCNE3	DHX40	KCNMA1
KCNJ11	DLX3	KCNMB4
KLC2	DLX4	KCNN2
LDHA	DPH1	KCNQ1
LIN7C	DUSP3	KCNQ2
LRDD	ETV4	KCNQ3
LRFN4	EZH1	KCNQ5
MACROD1	FAM20A	KCNS3
MADD	FBXO39	KCNV1
MAP3K11	FGF11	KCTD12
MAP4K2	FOXJ1	KCTD15
MED17	FZD2	KCTD8
MED19	GALR2	KHDRBS3
MLL	GAS7	KIAA0922
MRE11A	GLTPD2	KIAA0980
MRPL16	GPRC5C	KIAA1199
MRPL21	GRIN2C	KIAA1324
MRPL23	GUCY2D	KIF17
MRPL49	HAP1	KIF1A
MTL5	HCRT	KIF3C
MUS81	HIC1	KIF6
NADSYN1	HLF	KIFC3
NAP1L4	HOXB13	KIRREL2
NARS2	HOXB7	KISS1R
NAT10	HOXB8	KITLG
NCAPD3	HOXB9	KLC2
NDUFC2	HS3ST3A1	KLF12
NDUFS3	HS3ST3B1	KLF14
NDUFS8	ITGA3	KLF15
NLRP14	ITGB3	KLF2
NLRX1	ITGB4	KLF4
NPAT	JUP	KLF5
NUCB2	KCNH4	KLHDC1
NUDT8	KCNJ2	KLHDC8B
NXF1	KIF1C	KLK10
ORAOV1	LHX1	KNDC1
OTUB1	LSMD1	LAD1
P2RX3	MAP2K3	LAMA1
PAAF1	MAPT	LAMA5
PACS1	MED31	LAPTM4B
PAFAH1B2	MGAT5B	LARGE
PAK1	MLLT6	LARP6
PANX1	MPP3	LASS4
PARVA	MYOCD	LBX1
PCNXL3	NAGS	LCMT2
PDDC1	NGFR	LEF1
PDGFD	NOG	LENG9
PDHX	NPB	LEPREL1
PGM2L1	NPTX1	LETM2
PHF21A	NR1D1	LGALS3
PICALM	NTN1	LGI2
PITPNM1	OTOP2	LHFP
PLCB3	OTOP3	LHX1
POLA2	PHOSPHO1	LHX2
POLD3	PLEKHH3	LHX4
POLR2G	PRCD	LHX5
PPFIA1	PRKCA	LHX6
PPP1CA	PYY	LHX9
PPP1R14B	RAB11FIP4	LIPA
PPP2R5B	RAB37	LIPG
PRCP	RAB40B	LLGL2
PRDM10	RAI1	LMX1A
PRKCDBP	RAMP2	LMX1B
PRKRIR	RASD1	LOX
PRPF19	RILP	LOXL1
PRRG4	RNFT1	LOXL2
PSMC3	RPRML	LRDD
PSMD13	SARM1	LRIG3
PTDSS2	SCARF1	LRP12
PTPRJ	SCRN2	LRP2
PTS	SECTM1	LRRC3
PVRL1	SLC13A5	LRRC33
RAB1B	SLC16A11	LRRC3B
RAB39	SLC16A3	LRRC49
RAB6A	SLC16A6	LRRC56
RAD9A	SLC25A39	LRRC6
RBM4	SLC2A4	LRRC8C
RBM4B	SLC47A1	LRRTM1
RBM7	SLC6A4	LSR
RCE1	SLFN11	LTBP1
RCOR2	SMARCD2	LTBP2
RDX	SOCS3	LTBP3
RELA	SOX9	LYN
REXO2	SPHK1	LYNX1
RHOD	SRP68	LYPD6
RHOG	SSTR2	LYPLA3
RIC3	ST6GALNAC2	MAF
RIC8A	STAC2	MAN1A1
RNASEH2C	TBX21	MAN1C1
RNF141	TBX4	MAP1B
RNH1	TMEM102	MAP3K11
RPL27A	TMEM132E	MAP3K9
RPLP2	TMEM88	MAP6D1
RPS6KA4	TNK1	MAP9
RPUSD4	TRIM25	MAPK11
RRAS2	TTYH2	MAPK12
RRM1	ULK2	MAPK13
RSF1	USH1G	MAPK15
RTN3	VMO1	MAPT
SAC3D1	VTN	2011-03-10
SAPS3	WNK4	MARK3
SART1	WNT3	MARVELD1
SC5DL	WNT9B	MARVELD3
SCYL1	XYLT2	MATK
SF1	YBX2	MATN3
SF3B2	ZACN	MBOAT2
SHANK2	ZMYND15	MBP
SIRT3	ZNF232	MCAM
SLC15A3	ZNF287	MCOLN3
SLC22A18	ZNHIT3	MDFI
SLC25A45	ADCYAP1	MDK
SLC29A2	APCDD1	MEGF10
SLC36A4	BCL2	MEGF11
SLC37A4	C18orf1	MERTK
SNORA3	C18orf43	MFI2
SNORA52	C18orf8	MFSD2
SNX15	CDH2	MGAT3
SORL1	CIDEA	MGAT5B
SPCS2	COLEC12	MGLL
SRPR	DSC3	MGMT
SSH3	EMILIN2	MICAL1
SSRP1	EPB41L3	MICAL2
ST3GAL4	FAM59A	MICB
STIP1	FHOD3	MIPOL1
STK33	GALR1	MITF
STT3A	GATA6	MLF1
STX3	GNAL	MLH1
STX5	L3MBTL4	MLH3
SYVN1	LAMA1	MLLT4
TAF10	LIPG	MLPH
TAF6L	MBP	MLXIPL
TALDO1	MOCOS	MME
TBC1D10C	NETO1	MMP16
TBRG1	NFATC1	MMP2
TCP11L1	NOL4	MMP25
THY1	ONECUT2	MMS19
THYN1	PQLC1	MN1
TIMM10	PSTPIP2	MOCOS
TIRAP	PTPRM	MOSPD3
TM7SF2	RAX	MOXD1
TMEM109	ROCK1	MPP3
TMEM132A	SALL3	MRPL41
TMEM136	SERPINB8	MSH5
TMEM138	SMAD7	MSI1
TMEM179B	ST8SIA5	MSRB3
TMEM80	TNFRSF11A	MSX1
TMEM9B	TSHZ1	MSX2
TOLLIP	TUBB6	MT1E
TP53I11	ZADH2	MT1F
TPCN2	AC008738.7	MT3
TRAF6	AC010327.8	MTERF
TRAPPC4	ANGPTL4	MTHFSD
TSG101	ANKRD27	MTL5
TSKU	APLP1	MTNR1A
TSPAN4	ARHGEF1	MTUS1
TSSC4	ARRDC2	MUM1
TTC12	ATP1A3	MX1
TUT1	B3GNT3	MXI1
UBE2L6	BLVRB	MYADM
UBXN1	C19orf2	MYCN
UCP2	C19orf22	MYD88
UEVLD	C19orf51	MYH10
UVRAG	C19orf55	MYH11
VEGFB	CADM4	MYL9
VPS26B	CCDC8	MYO1B
WEE1	CD70	MYO3A
XRRA1	CDC37	MYO5A
YAP1	CEBPA	MYO6
ZBED5	CEBPG	MYOCD
ZBTB3	CILP2	MYOD1
ZDHHC24	CIRBP	MYRIP
ZDHHC5	COMP	N6AMT2
ZFPL1	CRLF1	NAAA
ZNF143	DLL3	NAT14
ZNF202	EFNA2	NAV2
ZNF214	EXOC3L2	NBPF3
ZNF215	FBXO27	NCKIPSD
ZNHIT2	FGF22	NCOA4
AACS	GADD45B	NDRG4
ABCB9	GNG8	NDUFA4L2
AC005911.6	GRIN2D	NEDD4
AC006122.24	HCN2	NEF3
AC007564.10	HSPB6	NEFH
AC009779.18	ICAM1	NEGR1
AC025262.27	ICAM4	NEK9
AC084199.28	ICAM5	NELL1
AC125807.9	IFI30	NENF
ACAD10	IL11	NEO1
ACTR6	INSL3	NES
ADIPOR2	JOSD2	NETO1
AL021546.3	KANK3	NEU1
ALDH2	KDELR1	NEURL
ALKBH2	KIRREL2	NEUROG1
ANAPC7	KISS1R	NEUROG2
APAF1	KLC3	NEUROG3
APOF	KLF16	NFATC1
APPL2	KLF2	NFATC2IP
ARF3	KLK10	NFE2L3
ARL1	LENG9	NFIA
ASB8	LRRC8E	NFIB
ATF1	MADCAM1	NGF
ATF7	MAST1	NGFR
ATF7IP	MATK	NHEDC2
ATP5B	NFIC	NHLRC1
ATP5G2	NPAS1	NID2
ATP6V0A2	NPHS1	NIPA1
ATXN2	OSCAR	NIPSNAP1
BCAT1	PCP2	NKD1
BCDIN3D	PCSK4	NKD2
BICD1	PHLDB3	NKX2-2
BIN2	POLRMT	NKX2-5
BLOC1S1	POU2F2	NKX2-8
BRAP	PPFIA3	NKX6-1
BRI3BP	PPP1R13L	NME3
BTG1	PVR	NMNAT3
C12orf11	REEP6	NMU
C12orf24	RFX2	NOG
C12orf30	RGL3	NOL3
C12orf32	RGS9BP	NOL4
C12orf44	RTBDN	NOTCH3
C12orf48	S1PR5	NOV
C12orf49	SCN1B	NOVA2
C12orf5	SHD	NPAL1
C12orf52	SLC17A7	NPAS2
C12orf57	SLC7A10	NPAS3
C12orf60	SNAPC2	NPB
C12orf61	SPTBN4	NPPC
C12orf62	SSBP4	NPR2
C12orf65	STXBP2	NPTX1
CAND1	SYT5	NPTX2
CAPS2	TBXA2R	NR2E1
CBX5	TGFB1	NR2F2
CCDC41	TLE2	NRCAM
CCDC62	TMEM59L	NRG1
CCDC64	TNFAIP8L1	NRP1
CCNT1	TNFSF9	NRP2
CCT2	TRIM28	NRSN2
CD63	TTYH1	NRXN2
CDCA3	ZBTB7A	NSD1
CDK2	ZFP82	NSUN7
CDK2AP1	ZNF441	NT5C1A
CEP290	ZNF584	NT5C3L
CHD4	ZNF667	NT5E
CHFR	ZNF702P	NTN1
CKAP4	ABHD1	NTN4
CLIP1	AC008073.8	NTNG1
CMAS	AC080164.6	NTRK2
CNPY2	ACADL	NTRK3
CORO1C	ACP1	NUAK2
COX6A1	ACVR1C	NUDT14
CREBL2	ALK	NUMBL
CRY1	ANKMY1	NUP188
DAZAP2	ANKRD53	NUP210
DDIT3	ANKRD57	NXNL2
DDX23	AOX1	NXPH3
DDX51	ARID5A	NXPH4
DDX54	ATOH8	OBSL1
DDX55	ATP6V1C2	OCA2
DEPDC4	BBS5	OCIAD2
DHX37	BOLL	OCLN
DIABLO	C2orf78	OGDHL
DNAJC14	CACNB4	OLFM1
DNM1L	CAPN14	OLFML2B
DUSP16	CCDC140	OLIG2
DYNLL1	CD8A	ONECUT1
DYRK2	CDK5R2	ONECUT2
E2F7	CGREF1	OPRK1
EEA1	COL4A3	ORAI3
EIF4B	COL4A4	OSBPL1A
EMG1	CREG2	OSBPL3
ERBB3	CRYBA2	OSBPL6
ERC1	CTDSP1	OSMR
ERP29	CXCR4	OSR1
ETV6	CYP1B1	OTOP2
FAM60A	CYP26B1	OTOP3
FBXO21	DGKD	OTP
FBXW8	DLX1	OTUB2
FGFR1OP2	DLX2	OVOL1
FICD	DNMT3A	OVOL2
FKBP11	DOK1	OXR1
FOXJ2	DPYSL5	P2RY2
FOXM1	DTNB	PABPC5
GAPDH	DUSP2	PADI2
GATC	DUSP28	PAG1
GCN1L1	ECEL1	PAK7
GDF11	EGR4	PALM
GLIPR1L2	EHD3	PANX2
GNPTAB	EIF2AK2	PAOX
GNS	EMX1	PAPPA
GOLGA3	EN1	PAQR5
GPN3	EPAS1	PAQR8
H2AFJ	EPHA4	PARD3
HIST4H4	ERBB4	PARD6G
HMGA2	FAM84A	PARVA
HNRPA1L3	FNDC4	PATZ1
HSP90B1	FOSL2	PAWR
IPO8	GAD1	PAX2
IQCD	GALNT14	PAX5
IRAK4	GBX2	PAX7
ISCU	GCKR	PBX4
ITGA7	GDF7	PCBP4
ITPR2	GPC1	PCCA
JARID1A	GPR155	PCDH1
KCNMB4	GPR39	PCDH21
KCTD10	HAAO	PCDH7
KNTC1	HES6	PCDH9
LASS5	HOXD12	PCGF1
LETMD1	HOXD13	PCGF2
LMBR1L	HPCAL1	PCOLCE2
LOH12CR1	IHH	PCSK5
LOH12CR2	INHBB	PCSK9
LPCAT3	ITGA4	PDE10A
LRIG3	KCNF1	PDE3A
LRP1	KCNJ3	PDE3B
LRP6	KCNK12	PDE8B
LTA4H	KCNS3	PDE9A
M6PR	KLF11	PDGFB
MANSC1	LBX2	PDGFC
MAP3K12	LIMS2	PDGFD
MAPKAPK5	LOXL3	PDLIM1
MBD6	LRP1B	PDLIM3
MCRS1	LRP2	PDPN
MDM1	LRRTM1	PDX1
MDM2	LY75	PDZRN3
MED13L	MALL	PELI2
MED21	MATN3	PENK
MLF2	MLPH	PER1
MMAB	NEUROD1	PER3
MRPS35	NPAS2	PEX7
MVK	NPPC	PFKFB3
NAB2	NR4A2	PFKP
NEDD1	NRP2	PFN2
NFYB	NRXN1	PGAM5
NOC4L	ODC1	PGBD1
NUP107	OSBPL6	PGF
NUP37	OSR1	PGPEP1
OGFOD2	OTX1	PHF21B
OSBPL8	PAX3	PHLDA2
PAWR	PCGF1	PHLDA3
PCBP2	PFN4	PHOSPHO1
PCTK2	PLA2R1	PHOX2A
PEX5	POLE4	PHPT1
PGAM5	POMC	PHYHIPL
PHB2	POU3F3	PIGZ
PHC1	PQLC3	PIK3CD
PHLDA1	PRKCE	PIP4K2C
PIP4K2C	PSMD1	PIP5K1B
PLEKHA5	PTHR2	PIP5KL1
PLEKHA9	PXDN	PISD
POLR3B	RALB	PITX3
POP5	REEP1	PKDREJ
POU6F1	RHBDD1	PKN1
PPP1CC	RHOB	PKP1
PPP1R12A	RNPEPL1	PLA2G7
PPTC7	RPRM	PLCB1
PRDM4	SATB2	PLCG1
PRIM1	SERTAD2	PLEK2
PRKAB1	SGPP2	PLEKHA5
PRKAG1	SH2D6	PLEKHA9
PSMD9	SH3YL1	PLEKHC1
PTGES3	SIX2	PLEKHG2
PTPN11	SIX3	PLEKHG6
PTPN6	SLC1A4	PLEKHN1
PUS1	SLC30A3	PLK2
PUS7L	SLC40A1	PLOD2
PWP1	SLC4A3	PLS3
PXN	SLC5A7	PLXDC2
RAB21	SLC9A2	PLXNC1
RAB35	SPDYA	PMM1
RAB5B	SPHKAP	PNMA2
RAD52	SRD5A2	PNPLA3
RAP1B	ST6GAL2	PNPLA5
RAPGEF3	STAM2	POMT1
RASSF8	STEAP3	POU2F3
RDH5	TFCP2L1	POU3F2
RFC5	TGFA	POU4F1
RHOF	TLX2	POU4F2
RIC8B	TMEFF2	POU4F3
RNF10	TMEM163	PPAP2B
RNF34	TMEM178	PPAPR3
RNFT2	TMSB10	PPARA
RPAP3	TUBA1	PPARG
RSRC2	UCN	PPIC
SART3	VAMP5	PPL
SCARB1	VAX2	PPM1E
SCYL2	WNT10A	PPP1R13B
SFRS8	ACSS2	PPP1R16B
SFRS9	ACTR5	PPP1R1A
SH2B3	ADAM33	PPP1R3B
SILV	ADRA1D	PPP1R3C
SLC11A2	ANKRD60	PPP1R9A
SLC15A4	ATRN	PPP2R3A
SLC25A3	BFSP1	PPP2R5B
SLC2A14	BMP2	PQLC1
SLC38A1	BMP7	PRDM12
SLC38A2	C20orf100	PRDM16
SLC4A8	C20orf112	PRDX2
SLC6A15	C20orf133	PRICKLE1
SNRPF	C20orf177	PRKACB
SP1	C20orf20	PRKAG2
SPSB2	C20orf201	PRKAR2B
STAT2	C20orf27	PRKCA
STRAP	C20orf39	PRKCDBP
TARBP2	C20orf58	PRKCE
TBK1	CBFA2T2	PRKCH
TCP11L2	CBLN4	PRKCQ
TCTN2	CPXM1	PRKG1
TDG	CYP24A1	PRMT8
THAP2	DUSP15	PRNP
TIMELESS	EDN3	PRRG4
TMED2	EEF1A2	PRRX1
TMEM116	EMILIN3	PRRX2
TMEM5	EYA2	PRSS12
TMPO	FAM113A	PRSS23
TMTC3	FOXA2	PRSS27
TPI1	GATA5	PRTFDC1
TRAFD1	GNAS	PSAT1
TRIAP1	HCK	PSD2
TRPV4	HRH3	PSEN1
TUBA1A	KCNB1	PSMD2
TUBA1B	KCNG1	PSRC1
TUBA1C	KCNK15	PSTPIP2
TULP3	KIAA0980	PTCH2
TWF1	MAFB	PTEN
UBA52	NANP	PTF1A
UBE2N	NFATC2	PTGDR
UBE3B	NKX2-2	PTGER2
ULK1	NTSR1	PTGER3
UNG	OPRL1	PTGFR
USP15	OVOL2	PTGFRN
USP30	PLCB1	PTGIS
USP5	PLTP	PTGS2
VAMP1	PPP1R16B	PTK2
VPS33A	PPP1R3D	PTPN14
WBP11	PROKR2	PTPRE
WDR51B	PRR17	PTPRG
WNK1	PTPRT	PTPRK
WSB2	RGS19	PTPRM
YEATS4	RIMS4	PTPRN
ZC3H10	RP11-93B14.6	PTPRN2
ZNF10	SLC12A5	PTPRO
ZNF140	SLC24A3	PTPRT
ZNF384	SLC32A1	PTPRU
ZNF84	SLCO4A1	PTPRZ1
AKAP11	SMOX	PTRF
AL136218.26	SNAI1	PVRL3
AL359736.19	SNTA1	PXDN
AL512505.8	SSTR4	PYCARD
AL606514.3	STX16	PYCR1
ALG5	SULF2	PYGL
ANKRD10	TBC1D20	PYGO1
B3GALTL	TCF15	QKI
C13orf1	TCFL5	RAB11FIP4
C13orf23	TFAP2C	RAB15
C13orf27	THBD	RAB20
C13orf3	TP53INP2	RAB24
C13orf34	TRIB3	RAB32
C13orf37	TTLL9	RAB36
CARS2	VPS16	RAB39
CDADC1	VSX1	RAB39B
CDC16	ZFP64	RAB3B
CDK8	ZNF343	RAB3C
CENPJ	ZNF512B	RAB6B
CKAP2	ADAMTS1	RAB7L1
COG3	ADAMTS5	RAC3
COG6	ADARB1	RAD51L3
CUL4A	AGPAT3	RAI14
DCUN1D2	APP	RALGDS
DIS3	BACE2	RALGPS2
DNAJC3	C21orf63	RAMP2
EBPL	CBR3	RAMP3
EFHA1	CHODL	RASD1
ERCC5	CLIC6	RASD2
EXOSC8	COL6A2	RASEF
FBXL3	DSCR1	RASGRF1
FNDC3A	ERG	RASGRF2
FOXO1A	GRIK1	RASGRP2
FRY	KCNJ6	RASL10B
GPC6	MX1	RASL12
GTF2F2	NCAM2	RASSF1
HMGB1	OLIG2	RASSF5
HSPH1	PIGP	RASSF8
IFT88	PTTG1IP	RBP1
ING1	RIPK4	RBP4
INTS6	SIM2	RBP7
ITM2B	SLC37A1	RBPMS
KBTBD6	SUMO3	RCOR2
KBTBD7	TIAM1	RDX
KPNA3	TMPRSS2	RECQL4
LATS2	TSGA2	RELN
LECT1	TTC3	RERG
LNX2	ZNF295	RET
MED4	AIFM3	RFC1
MIPEP	AL049758.2	RFTN1
MIRHG1	ARFGAP3	RFX4
MPHOSPH8	ARVCF	RGS11
MRP63	BIK	RGS7
MRPS31	C22orf25	RHBDL1
MTIF3	CABP7	RHEB
MTMR6	CACNG2	RHOB
N6AMT2	CARD10	RHOBTB3
NHLRC3	CBX7	RHOF
NUDT15	CDC42EP1	RHOQ
PARP4	CELSR1	RHOV
PCCA	DUSP18	RHPN2
PCID2	FOXRED2	RIC3
PDS5B	GCAT	RILP
PHGDHL1	GNAZ	RIMS4
PIBF1	GP1BB	RNF125
POLR1D	H1F0	RNF32
POMP	IL17RA	ROCK1
RAP2A	KCNJ4	ROPN1L
RB1	KLHL22	ROR1
RBM26	KREMEN1	ROR2
RCBTB1	MAFF	RORA
RCBTB2	MAPK11	RP11-369J21.6
RFXAP	MAPK8IP2	RP11-93B14.6
RNASEH2B	MGAT3	RPL39L
RNF6	MMP11	RPP25
RPL21	MN1	RPRML
SAP18	NEFH	RPS6KA2
SETDB2	ODF3B	RPS6KL1
SLC7A1	PANX2	RRAD
SNORA27	PDGFB	RRAGA
SNORA31	PKDREJ	RRAS2
SNORD102	POLR2F	RRP15
SPATA13	PPARA	RSPO1
SPG20	PPM1F	RSPO3
SPRY2	RASD2	RTN4RL2
STK24	RASL10A	RUNDC3B
SUCLA2	RIBC2	RUNX3
SUGT1	RNF185	RUSC1
TFDP1	RP4-742C19.11	RXFP3
TM9SF2	SBF1	RYR2
TMCO3	SCARF2	S100A6
TPP2	SCO2	S1PR2
TPT1	SCUBE1	S1PR5
TRIM13	SERHL	SALL1
TSC22D1	SERHL2	SALL3
TUBGCP3	SMC1B	SAMD10
UBL3	SMCR7L	SAMD11
UCHL3	TIMP3	SAMD14
UFM1	TNFRSF13C	SAMD4A
UGCGL2	TSPO	SAMHD1
VPS36	TTC38	SARM1
WBP4	TUBA8	SCARF2
WDFY2	TXN2	SCCPDH
ZC3H13	UPB1	SCD5
ZMYM2	WNT7B	SCN3B
ZMYM5	ZBED4	SCNN1G
ABCD4	ABHD14A	SCRIB
AC005225.2	ABHD14B	SCRN1
AC006146.2	ABHD6	SCRT1
ACIN1	ACPL2	SDC1
ACOT4	ADAMTS9	SDC2
ACTN1	ADCY5	SDC4
AHSA1	AGTR1	SDCBP
AL049872.3	ALDH1L1	SECTM1
AL136295.17	ALS2CL	SEMA4C
AL352979.4	AMOTL2	SEMA5A
ALKBH1	B3GALNT1	SEMA6A
ANG	B3GNT5	SEMA7A
ANGEL1	BOC	SERF2
ANKRD9	C3orf39	SERHL
AP4S1	C3orf45	SERHL2
APEX1	C3orf54	SERPINB9
ARF6	C3orf72	SERTAD4
ARHGAP5	CACNA1D	SESN3
ARID4A	CAMK2N2	SETD7
ATP5S	CCK	SFMBT1
ATP6V1D	CD47	SFRP1
ATXN3	CDCP1	SFRP2
BAG5	CHCHD6	SFRP4
BRF1	CHDH	SFRP5
BTBD6	CHRD	SFXN5
BTBD7	CHST13	SGCB
C14orf1	CISH	SGPP2
C14orf10	CLDN1	SGSH
C14orf100	CLDN11	SH2B3
C14orf102	CLSTN2	SH2D4A
C14orf104	CMTM8	SH3BGRL2
C14orf106	CSPG5	SH3BP4
C14orf119	CYB561D2	SH3GL2
C14orf126	DGKG	SH3GL3
C14orf128	DLEC1	SH3GLB1
C14orf133	ECE2	SH3PX3
C14orf142	EIF4E3	SIM2
C14orf143	EIF5A2	SIX1
C14orf147	ENTPD3	SIX2
C14orf149	EOMES	SIX3
C14orf153	EPHB1	SIX4
C14orf156	EPHB3	SIX6
C14orf166	ETV5	SKAP2
C14orf181	EVI1	SLC12A4
C14orf2	FAM19A4	SLC12A7
C14orf21	FAM62C	SLC13A5
C14orf33	FBLN2	SLC16A1
C14orf45	FEZF2	SLC16A10
CCNK	FOXL2	SLC16A11
CDC42BPB	FOXP1	SLC16A12
CDCA4	FYTTD1	SLC16A13
CDKN3	GATA2	SLC17A7
CFL2	GPD1L	SLC18A2
CGRRF1	GPR27	SLC18A3
CHGA	GRM7	SLC19A1
CNIH	HRASLS	SLC1A1
COQ6	IL17RB	SLC1A4
CPSF2	IL1RAP	SLC22A17
CYP46A1	ITGA9	SLC22A3
DAD1	ITPR1	SLC24A3
DDHD1	KLF15	SLC25A13
DDX24	LAMP3	SLC25A21
DHRS1	LRRC3B	SLC25A39
DICER1	MAPKAPK3	SLC25A4
EAPP	MFI2	SLC27A2
EGLN3	MFSD1	SLC27A3
EIF2B2	MGLL	SLC27A6
EIF2S1	MITF	SLC29A2
EIF5	MME	SLC2A4
ENTPD5	MYRIP	SLC2A4RG
ERO1L	NMNAT3	SLC2A6
EXOC5	OXTR	SLC2A8
FAM161B	P2RY1	SLC30A2
FANCM	PAQR9	SLC30A3
FBXO33	PCBP4	SLC30A4
FKBP3	PDIA5	SLC32A1
FNTB	PDZRN3	SLC34A2
FOXN3	PIGZ	SLC35C2
FRMD6	PLCD1	SLC35F3
GLRX5	PLXND1	SLC38A1
GMFB	PODXL2	SLC38A3
GNPNAT1	PPARG	SLC39A3
GPR68	PPM1M	SLC39A8
GSTZ1	PPP1R2	SLC44A2
GTF2A1	PROK2	SLC44A3
HIF1A	PXK	SLC46A2
HNRNPC	RAB6B	SLC46A3
IPO4	RARRES1	SLC47A1
ISCA2	RASSF1	SLC4A3
ITPK1	RBP1	SLC4A8
JUB	RFTN1	SLC5A5
KIAA0391	RSRC1	SLC5A8
KIAA1409	SCN5A	SLC6A15
KIAA1737	SEMA3F	SLC6A2
KLC1	SFMBT1	SLC6A20
KLHDC2	SHOX2	SLC6A4
KTN1	SIDT1	SLC6A9
L2HGDH	SLC38A3	SLC7A10
LRP10	SLC6A1	SLC8A3
LRRC9	SLC6A20	SLC9A3
MAP3K9	SLCO2A1	SLCO2A1
MAP4K5	SLITRK3	SLCO3A1
MAPK1IP1L	SOX14	SLCO5A1
MAX	SPSB4	SLFN11
MGAT2	TFG	SLIT1
MIPOL1	THPO	SLIT2
MLH3	TMEM22	SLIT3
MMP14	TRH	SLITRK3
MTHFD1	TUSC4	SLITRK5
NDUFB1	UBE2E2	SMAD1
NEK9	VIPR1	SMAD7
NFKBIA	WNT5A	SMARCD3
NP	WNT7A	SMC1B
NPC2	ZIC1	SMO
NUDT14	ZIC4	SMOC1
OSGEP	ZMYND10	SMPD3
OTUB2	AC020593.1	SMPDL3A
PAPOLA	AC079341.6	SMTN
PCK2	AC108142.1	SNAP25
PCNX	AC110298.5	SNAP91
PLEKHC1	AC111197.4	SNCAIP
PNMA1	ACSL1	SNN
PNN	ADRA2C	SNTA1
POMT2	AGPAT9	SNX18
PPIL5	AGXT2L1	SNX19
PPP2R5E	ATOH1	SNX22
PSEN1	BAPX1	SNX32
PSMA3	BMP3	SNX9
PSME1	BMPR1B	SOCS2
PSME2	C4orf31	SOLH
PYGL	C4orf32	SORCS3
RAB15	CAMK2D	SORL1
RAB2B	CCDC96	SOX14
RAGE	CD38	SOX21
RCOR1	CDS1	SOX7
RNASE4	CPEB2	SOX9
RNF31	CRMP1	SPATA18
RPL36AL	CXCL1	SPDYA
RPS29	CXCL3	SPEF2
RPS6KA5	DCHS2	SPG20
RPS6KL1	DGKQ	SPHK1
SCARNA13	DKK2	SPINT2
SEC23A	DOK7	SPOCK1
SEL1L	EPHA5	SPON1
SETD3	FGF5	SPRY4
SFRS5	FGFR3	SPSB2
SIVA1	FGFRL1	SPSB4
SIX4	GABRA2	SQLE
SLC25A21	GABRA4	SQRDL
SLC25A29	GLRB	SRD5A2
SLC38A6	GPR78	SSBP2
SMEK1	GRIA2	SSH3
SNORA28	GRK4	SSPN
SNX6	GRPEL1	SSTR1
SOCS4	GSH2	SSTR2
SPTLC2	HAND2	SSTR4
SRP54	HERC3	ST14
STRN3	HERC5	ST3GAL1
STYX	HHIP	ST6GAL2
SUPT16H	HPSE	ST6GALNAC3
TDP1	HS3ST1	ST6GALNAC5
TINF2	HTRA3	ST6GALNAC6
TM9SF1	IGFBP7	ST8SIA1
TMEM55B	IL15	ST8SIA2
TOMM20L	JAKMIP1	ST8SIA5
TOX4	KCTD8	STAC2
TPPP2	KDR	STARD5
TRAPPC6B	KIAA0922	STBD1
TRIP11	KIT	STEAP2
TRMT5	KLF3	STK25
TTC8	LCORL	STK32C
TTLL5	LEF1	STK33
UBR7	LETM1	STMN3
VRK1	LGI2	STOM
VTI1B	LIMCH1	STX11
WDHD1	LRAT	STXBP2
WDR20	MTNR1A	STXBP6
WDR23	NAT8L	SULF2
WDR89	NEUROG2	SULT4A1
XRCC3	NKX6-1	SUMO3
YY1	NMU	SUPT3H
ZBTB1	NPAL1	SUSD3
ZBTB25	NPY2R	SV2B
ZC3H14	NPY5R	SVIL
ZFP36L1	NR3C2	SYK
ZFYVE1	PCDH7	SYN2
ZFYVE21	PDLIM3	SYNGR1
ZNF219	PGM2	SYT10
ZNF410	POU4F2	SYT2
ABHD2	PPP3CA	SYT6
AC009996.7	PRSS12	SYT7
AC012100.1	RFC1	SYT9
AC012476.8	SCD5	T
AC012652.1	SETD7	TAC1
AC090164.22	SFRP2	TAGLN2
AC092701.2	SH3BP2	TBC1D4
ADAL	SLC10A4	TBCD
ADAM10	SLC10A7	TBX2
AKAP13	SLC34A2	TBX20
ALPK3	SLIT2	TBX3
ANXA2	SNCA	TBX6
AP3B2	STBD1	TBXA2R
APH1B	TBC1D1	TC2N
ARID3B	TBC1D14	TCBA1
ARIH1	TMEM155	TCF7
ARRDC4	TRPC3	TCF7L1
ASB7	UNC5C	TCTE1
BLM	VEGFC	TCTN2
BMF	ZAR1	TDRD5
BTBD1	ABLIM3	TEAD4
BUB1B	AC008694.6	TEKT2
C15orf15	AC008781.7	TERT
C15orf24	AC025171.8	TES
C15orf29	AC034236.1	TET1
C15orf33	AC114947.1	TEX14
C15orf39	ADAM19	TFAP2C
C15orf44	ADAMTS2	TFAP2E
C15orf58	ADRB2	TFCP2L1
CASC4	ANKH	TFPI2
CASC5	ANKRD43	TGFBI
CCNB2	ARL10	TGFBR2
CCNDBP1	C5orf33	THBD
CCPG1	C5orf38	THBS1
CD276	C5orf39	THBS4
CEP27	CCNO	THEM4
CHAC1	CDH6	THNSL2
CHSY1	CDO1	THRB
CIB1	CDX1	TIAM1
CIB2	COL23A1	TIMP2
CLN6	CPLX2	TIMP3
CLPX	CTNND2	TJP1
COMMD4	CXCL14	TLE2
COPS2	DOCK2	TLE4
COX5A	DRD1	TLL2
CSNK1G1	DUSP1	TLX2
CTDSPL2	EBF1	TLX3
D4ST1	EFNA5	TM6SF1
DIS3L	EGFLAM	TM7SF2
DNAJA4	EGR1	TMBIM1
DNAJC17	ELL2	TMCO4
DPP8	F2R	TMED3
DTWD1	FAM105A	TMEFF2
DUT	FBN2	TMEM132A
EHD4	FGF18	TMEM132D
EIF3S1	FLT4	TMEM132E
ELL3	FOXD1	TMEM150
ETFA	GABRB2	TMEM151A
FAM96A	GALNT10	TMEM155
FAM98B	GDNF	TMEM158
FEM1B	GFPT2	TMEM163
FSIP1	GFRA3	TMEM168
GABPB2	GHR	TMEM169
GALK2	GLRA1	TMEM17
GPR176	GPR150	TMEM171
GTF2A2	GPRIN1	TMEM176A
HAPLN3	GPX3	TMEM178
HEXA	GRM6	TMEM2
IDH3A	HAND1	TMEM215
IGF1R	HTR4	TMEM22
IQGAP1	IRX2	TMEM42
IREB2	IRX4	TMEM51
KIF23	ISL1	TMEM52
KLHL25	ITGA2	TMEM54
LACTB	KCNIP1	TMEM63A
LARP6	KIAA1191	TMEM74
LCMT2	LOX	TNFAIP8L1
LEO1	LSM11	TNFRSF10A
LINS1	2011-03-03	TNFRSF10B
LOXL1	MSX2	TNFRSF10D
LRRC28	NEUROG1	TNFRSF11A
LRRC49	NKX2-5	TNFSF9
LRRC57	NPR3	TNPO1
MAP2K1	NR2F1	TOMM20L
MAP2K5	OSMR	TP53INP1
MAPK6	OTP	TP73
MFGE8	OXCT1	TPBG
MRPL46	P4HA2	TPD52L1
MRPS11	PDE8B	TPM1
MTMR15	PDLIM7	TPM2
MYO9A	POU4F3	TPM4
NARG2	PPARGC1B	TPST1
NDN	PPIC	TRAF3
NDNL2	PSD2	TRAF5
NEO1	PURA	TRH
NGRN	RASGRF2	TRIB2
NIPA2	RHOBTB3	TRIM13
NPTN	RXFP3	TRIM45
NUSAP1	SCGB3A1	TRIM59
OIP5	SLC12A2	TRIM62
PDCD7	SLC22A4	TRPA1
PEX11A	SLC27A6	TRPC4
PGBD4	SLC6A3	TRPC6
PIAS1	SLC6A7	TRPS1
PIGB	SLC9A3	TSC22D1
PLEKHQ1	SLIT3	TSGA14
PML	SNCAIP	TSPAN12
POLG	SNCB	TSPAN13
PPIB	SNX18	TSPAN2
PRC1	SPEF2	TSPAN33
PSMA4	SPOCK1	TSPAN4
PTPN9	SPRY4	TSPAN5
RAB11A	ST8SIA4	TSSK3
RAB27A	TCF7	TTC12
RAB8B	TERT	TTC14
RASL12	TGFBI	TTC18
RHOV	THBS4	TTC22
RNF111	TLX3	TTC38
RPAP1	TMEM171	TTYH2
RPLP1	TRIM7	TUBA1
RPUSD2	UNC5A	TUBA8
RTF1	WDR36	TUBB2B
SCAMP2	AIM1	TUBB3
SEC11A	AL121789.38	TWIST1
SENP8	AL137003.12	TXNDC6
SERF2	AL353716.18	UACA
SERINC4	AL356311.6	UBE2C
SIN3A	ATXN1	UBE2E1
SLTM	B3GAT2	UBE2E2
SNRPA1	BACH2	UBE2L3
SNRPN	BMP6	UBE2L6
SNUPN	BXDC1	UBTD2
SNURF	C6orf108	UCHL1
SNX1	C6orf114	UCN
SORD	C6orf145	UCP2
SPATA5L1	CDKN1A	UEVLD
SPG11	CLIC5	UGCGL2
SPINT1	COL12A1	ULBP1
STARD5	CPNE5	ULBP2
STOML1	DLL1	ULBP3
TARSL2	DSP	UNC5A
TCF12	EGFL9	UNC5C
THAP10	ELOVL2	USH1C
THBS1	EPHA7	USH1G
TM2D3	ESR1	USP13
TMOD3	ETV7	USP15
TPM1	EYA4	USP2
TSPAN3	FAM120B	UST
TTC23	FOXC1	UTF1
TUBGCP5	FOXF2	VASH1
TYRO3	FOXO3	VASH2
UACA	FOXP4	VAT1
UBE3A	FOXQ1	VAV3
UBL7	FRS3	VAX1
USP8	GFOD1	VAX2
VPS39	GLP1R	VDR
WDR93	GMPR	VEGFB
ZFAND6	GNMT	VEGFC
ZFYVE19	GPR126	VENTX
ZNF710	GPR6	VGF
ABCC11	HCG4P11	VGLL2
AC004381.6	HCG4P8	VIM
AC004754.1	HEY2	VIPR2
AC009090.12	HLA-F	VLDLR
AC009171.3	HLA-G	VSNL1
AC020663.7	HSD17B8	VWA1
AC040162.5	HSF2	VWC2
AC044802.7	HSPA1A	WBSCR17
ACD	HSPA1B	WDR17
ADAD2	HSPA1L	WDR86
ADAT1	HTR1B	WFDC2
AFG3L1	HTR1E	WFS1
AL022341.6	IL20RA	WIF1
AMDHD2	IRF4	WIT1
ANKRD11	KCNK17	WNK2
ANKS3	KCNQ5	WNT1
AP1G1	LRP11	WNT10A
APRT	LRRC1	WNT2
ARL6IP1	MAGI1	WNT3
ASPHD1	MAN1A1	WNT3A
ATP6V0C	MAP3K5	WNT5A
ATP6V0D1	MAP7	WNT7A
ATXN2L	MAPK13	WNT7B
AXIN1	MDFI	WNT9B
BANP	MICB	WWC1
BCAR1	MOXD1	WWC2
BCKDK	MRAP2	WWTR1
BFAR	MYB	XKR6
BTBD12	NHLRC1	XKR8
C16orf14	NMBR	XRCC3
C16orf34	NR2E1	YAP1
C16orf42	NRN1	YBX2
C16orf46	NT5E	YOD1
C16orf48	PACSIN1	YPEL1
C16orf51	PDE10A	ZAR1
C16orf53	PLAGL1	ZBED3
C16orf55	POU3F2	ZBTB16
C16orf57	PPP1R14C	ZC3HAV1L
C16orf58	PRR18	ZCCHC11
C16orf59	PSMB9	ZDHHC8
C16orf61	RBM24	ZEB1
C16orf63	REV3L	ZFP2
C16orf67	RING1	ZFP28
C16orf70	RP11-420L9.2	ZFP37
C16orf71	RP11-67P15.1	ZFP82
C16orf72	RPS6KA2	ZHX2
C16orf75	RRAGD	ZMYM4
C16orf76	RREB1	ZMYM5
C16orf80	RSPO3	ZNF10
C16orf84	RXRB	ZNF132
C16orf85	SCUBE3	ZNF135
C16orf86	SLC16A10	ZNF14
C16orf87	SLC22A3	ZNF140
CACNA1H	SLC39A7	ZNF160
CCDC101	SMOC2	ZNF214
CCDC102A	SNAP91	ZNF215
CCNF	STX11	ZNF232
CD2BP2	SYNJ2	ZNF256
CDH1	T	ZNF264
CDH15	TAP1	ZNF287
CDIPT	TCBA1	ZNF296
CDK10	TCF21	ZNF304
CDR2	TCTE1	ZNF318
CENPN	TNFAIP3	ZNF32
CFDP1	TPD52L1	ZNF331
CHMP1A	TUBB2B	ZNF35
CHTF18	ULBP1	ZNF354C
CLDN6	ULBP2	ZNF365
CLDN9	ULBP3	ZNF396
CLEC16A	VGLL2	ZNF420
CLN3	ZDHHC14	ZNF480
CMTM3	ZNF318	ZNF485
CMTM4	ABHD11	ZNF491
CNOT1	AC002457.2	ZNF496
COG7	AC005046.3	ZNF512B
COG8	AC093726.4	ZNF549
COQ7	ACHE	ZNF550
CORO1A	ADCY1	ZNF559
CORO7	ADCYAP1R1	ZNF563
COX4I1	AEBP1	ZNF569
COX4NB	AMPH	ZNF570
CREBBP	AP1S1	ZNF580
CSNK2A2	AP4M1	ZNF581
CTCF	ARF5	ZNF624
CYBA	ATG9B	ZNF625
DBNDD1	ATP6V1F	ZNF655
DCI	AUTS2	ZNF660
DCTN5	BMPER	ZNF671
DCUN1D3	C7orf10	ZNF702P
DDX19A	C7orf11	ZNF711
DDX28	C7orf13	ZNF77
DECR2	C7orf23	ZNF781
DEXI	CASP2	ZNF790
DHODH	CAV1	ZNF8
DNAJA2	CCDC126	ZNF804B
DNAJA3	CDK6	ZNF83
DUS2L	CHN2	ZNF84
E2F4	CPVL	ZP3
E4F1	CRHR2	ZSCAN12
EARS2	CUX1	ZSCAN18
EDC4	DFNA5	ZSCAN5A
EEF2K	DGKI
EFCBP2	DLX5
ELMO3	EGFR
EME2	EPDR1
EMP2	EPO
EXOSC6	FASTK
FAHD1	FERD3L
FAM100A	FLNC
FANCA	FZD1
FBXL19	FZD9
FLYWCH2	GBAS
FTS	GCC1
FUS	GNB2
GABARAPL2	GPC2
GALNS	GPR37
GAN	GRB10
GAS8	HOXA1
GBL	HOXA3
GCSH	HOXA4
GDE1	HOXA5
GFOD2	HOXA6
GINS2	HOXA7
GINS3	HOXA9
GLG1	HSPB1
GNPTG	HTR5A
GOT2	IGFBP3
GPT2	IMPDH1
GSPT1	KCNH2
GTF3C1	KLF14
HAGH	LAMB1
HAS3	LRRC4
HERPUD1	MEPCE
HIRIP3	MEST
HSBP1	MLXIPL
IL4R	MNX1
ITFG1	NFE2L3
ITFG3	NPTX2
JMJD5	NPY
JMJD8	NRCAM
JPH3	OSBPL3
KARS	PARP12
KCTD13	PDGFA
KCTD5	PDK4
KIAA0174	PRKAG2
KIAA0182	PTPRN2
KIAA0556	RAMP3
KIF22	RARRES2
KLHDC4	RBM28
LONP2	RELN
LUC7L	RNF32
LYPLA3	RUNDC3B
LYRM1	SFRP4
MAF	SLC26A4
MAP1LC3B	SLC26A5
MAPK3	SLC29A4
MAPK8IP3	SMARCD3
MARVELD3	SMO
MAZ	SRCRB4D
MBTPS1	STAG3
METTL9	STX1A
MMP15	TAC1
MON1B	TBL2
MRPL28	TBX20
MRPS34	TFPI2
MSLNL	TMEM139
MVD	TMEM176A
MVP	TMEM176B
MYST1	TMUB1
NARFL	TWIST1
NDE1	UBE2D4
NDUFAB1	VGF
NDUFB10	VIPR2
NFATC2IP	VWC2
NFATC3	WDR86
NIP7	WNT2
NME3	ZCWPW1
NME4	ZNF467
NTAN1	ZNF800
NTHL1	ZNF804B
NUBP1	ZP3
NUBP2	AC135352.6
NUDT16L1	ADCY8
NUDT21	ADRA1A
NUTF2	ADRB3
OGFOD1	AF205589.5
ORAI3	ANK1
ORC6L	ARC
PALB2	BAALC
PARD6A	C8orf13
PHKB	C8orf55
PHKG2	CA2
PIGQ	CA8
PKMYT1	CEBPD
PLK1	COL14A1
PMM2	CRH
POLR2C	CTSB
POLR3E	CYP7B1
POLR3K	DENND3
PPL	DGAT1
PPP4C	DUSP26
PRMT7	DUSP4
PRRT2	EGR3
PRSS27	ERICH1
PSKH1	EXT1
PSMD7	FABP5
PYCARD	FAM150A
RAB26	FAM160B2
[truncated: 3,361 more rows]

## Sheet: GOSTATS-Bivalent
GOBPID	Pvalue	OddsRatio	ExpCount	Count	Size	Term	FDR
GO:0032501	8.48758e-14	1.87849	445.569	533	988	multicellular organismal process	3.02787e-10
GO:0048731	1.49672e-13	1.95997	310.725	391	689	system development	3.02787e-10
GO:0007275	7.2194e-13	1.87764	356.275	437	790	multicellular organismal development	9.73656e-10
GO:0030154	1.25056e-12	2.03875	230.902	301	512	cell differentiation	1.26494e-09
GO:0048856	1.80512e-12	1.88028	328.314	406	728	anatomical structure development	1.4607e-09
GO:0032502	5.46304e-12	1.8124	384.235	463	852	developmental process	3.68391e-09
GO:0048869	7.07185e-12	1.97175	238.569	307	529	cellular developmental process	4.08753e-09
GO:0048513	1.09084e-10	1.90547	231.353	295	513	organ development	5.5169e-08
GO:0007399	3.48206e-10	2.03991	166.412	221	369	nervous system development	1.56538e-07
GO:0048699	1.56547e-09	2.41047	95.6078	137	212	generation of neurons	6.33388e-07
GO:0030182	1.82554e-09	2.50765	86.5882	126	192	neuron differentiation	6.71466e-07
GO:0048468	2.51835e-09	2.2551	109.588	153	243	cell development	8.49102e-07
GO:0022008	5.08771e-09	2.29567	100.118	141	222	neurogenesis	1.58345e-06
GO:0023052	3.19897e-07	1.54397	391.902	450	869	signaling	9.24503e-05
GO:0030030	7.45865e-07	2.40476	62.2353	90	138	cell projection organization	0.000201185
GO:0048666	1.67e-06	2.34636	61.3333	88	136	neuron development	0.000422302
GO:0031175	2.00985e-06	2.58004	49.1569	73	109	neuron projection development	0.00044525
GO:0009653	2.08192e-06	1.66148	186.255	229	413	anatomical structure morphogenesis	0.00044525
GO:0045664	2.09089e-06	4.63427	21.1961	37	47	regulation of neuron differentiation	0.00044525
GO:0007267	2.20303e-06	1.94684	99.2157	132	220	cell-cell signaling	0.000445674
GO:0006928	2.3583e-06	2.08458	80.2745	110	178	cellular component movement	0.000454366
GO:0048667	5.87416e-06	2.65741	41.9412	63	93	cell morphogenesis involved in neuron differentiation	0.00108031
GO:0000904	8.5213e-06	2.40433	49.6078	72	110	cell morphogenesis involved in differentiation	0.00149025
GO:0007154	8.83983e-06	1.59727	191.667	232	425	cell communication	0.00149025
GO:0007166	9.84488e-06	1.60599	183.549	223	407	cell surface receptor linked signaling pathway	0.0015933
GO:0048812	1.12477e-05	2.52935	43.2941	64	96	neuron projection morphogenesis	0.00175031
GO:0007409	1.2547e-05	2.6122	40.1373	60	89	axonogenesis	0.0018802
GO:0032990	1.49108e-05	2.42252	46	67	102	cell part morphogenesis	0.00208032
GO:0048858	1.49108e-05	2.42252	46	67	102	cell projection morphogenesis	0.00208032
GO:0050767	1.6493e-05	3.13636	28.4118	45	63	regulation of neurogenesis	0.00213187
GO:0048870	1.6861e-05	2.17261	58.6275	82	130	cell motility	0.00213187
GO:0051674	1.6861e-05	2.17261	58.6275	82	130	localization of cell	0.00213187
GO:0009888	2.0158e-05	1.83519	95.1569	124	211	tissue development	0.00247149
GO:0051960	3.1116e-05	2.79651	32.0196	49	71	regulation of nervous system development	0.0037028
GO:0023046	3.38211e-05	1.43402	335.98	381	745	signaling process	0.00374102
GO:0023060	3.38211e-05	1.43402	335.98	381	745	signal transmission	0.00374102
GO:0016477	3.51148e-05	2.11518	57.7255	80	128	cell migration	0.00374102
GO:0060284	3.55635e-05	2.73008	32.9216	50	73	regulation of cell development	0.00374102
GO:0032989	3.60644e-05	2.01003	66.2941	90	147	cellular component morphogenesis	0.00374102
GO:0045165	3.69849e-05	2.88372	29.7647	46	66	cell fate commitment	0.00374102
GO:0007417	3.86493e-05	1.98594	68.098	92	151	central nervous system development	0.00381402
GO:0000902	4.72591e-05	2.01064	64.0392	87	142	cell morphogenesis	0.00455263
GO:0050793	6.54654e-05	1.77882	91.549	118	203	regulation of developmental process	0.00615984
GO:0003008	6.83693e-05	1.61476	136.647	168	303	system process	0.00628687
GO:0023033	7.17198e-05	1.51651	190.314	226	422	signaling pathway	0.0064484
GO:0001708	9.13302e-05	4.96142	13.5294	24	30	cell fate specification	0.00803308
GO:0051239	9.46546e-05	1.63533	122.667	152	272	regulation of multicellular organismal process	0.00814835
GO:0040011	0.000101646	1.92579	65.8431	88	146	locomotion	0.00856794

## Sheet: GOSTATS-H3K4Me3
GOBPID	Pvalue	OddsRatio	ExpCount	Count	Size	Term	FDR
GO:0023052	2.06439e-08	1.80817	110.972	161	851	signaling	5.71424e-05
GO:0007166	3.48582e-07	2.2657	34.1653	63	262	cell surface receptor linked signaling pathway	0.000482437
GO:0023033	1.17807e-06	2.12667	37.5557	66	288	signaling pathway	0.000819487
GO:0031175	1.18423e-06	4.06959	8.08491	23	62	neuron projection development	0.000819487
GO:0009653	1.68287e-06	2.12455	36.3821	64	279	anatomical structure morphogenesis	0.000931638
GO:0030030	3.32368e-06	2.99081	13.4314	31	103	cell projection organization	0.00118551
GO:0007155	3.86644e-06	2.7	16.8218	36	129	cell adhesion	0.00118551
GO:0022610	3.86644e-06	2.7	16.8218	36	129	biological adhesion	0.00118551
GO:0023060	3.95377e-06	1.67867	91.9333	130	705	signal transmission	0.00118551
GO:0023046	4.28291e-06	1.67517	92.0637	130	706	signaling process	0.00118551
GO:0048856	8.8147e-06	1.71841	72.5034	106	556	anatomical structure development	0.0022181
GO:0048699	2.12503e-05	2.6104	15.257	32	117	generation of neurons	0.00471276
GO:0043062	2.21336e-05	6.27839	3.26005	12	25	extracellular structure organization	0.00471276
GO:0030182	4.26235e-05	2.63658	13.6922	29	105	neuron differentiation	0.00830209
GO:0048666	4.49897e-05	3.04053	9.78014	23	75	neuron development	0.00830209
GO:0007165	4.93061e-05	1.59994	83.9788	116	644	signal transduction	0.00852995
GO:0030001	5.67989e-05	2.98228	9.91054	23	76	metal ion transport	0.00892294
GO:0048731	6.02797e-05	1.66676	64.4185	93	494	system development	0.00892294
GO:0001501	6.36594e-05	3.26325	8.08491	20	62	skeletal system development	0.00892294
GO:0032501	7.0719e-05	1.52758	107.842	142	827	multicellular organismal process	0.00892294
GO:0003008	7.90491e-05	2.09663	24.2547	43	186	system process	0.00892294
GO:0051239	7.90491e-05	2.09663	24.2547	43	186	regulation of multicellular organismal process	0.00892294
GO:0007154	8.14705e-05	1.79573	43.163	67	331	cell communication	0.00892294
GO:0007186	8.21566e-05	3.18642	8.21531	20	63	G-protein coupled receptor protein signaling pathway	0.00892294
GO:0032502	8.24851e-05	1.549	94.6717	127	726	developmental process	0.00892294
GO:0042060	8.38137e-05	4.33412	4.69447	14	36	wound healing	0.00892294
GO:0000902	9.47778e-05	2.54044	13.5618	28	104	cell morphogenesis	0.00971648
