# Supplementary material for: A DNA hypermethylation module for the stem/progenitor cell signature of cancer
Source: HighWire-hosted journal article supplement (doi:10.1101/gr.131169.111), 2012-03-05
Supplement: Table_S3.xlsx [file Table_S3.xlsx]

## Sheet: ES-H3K4Me3 marked chromatin
Molecular function (MF) associated with the top 10 Biological Function (BF) categories in methylated genes that are H3K4Me3-marked in hESC
BF categories:	signaling	cell surface receptor linked signaling pathway	signaling pathway	neuron projection development	anatomical structure morphogenesis	cell projection organization	cell adhesion	biological adhesion	signal transmission	signaling process
MF categories	signal transducer activity	signal transducer activity	signal transducer activity	protein kinase activator activity	signal transducer activity	protein kinase activator activity	cell adhesion molecule binding	cell adhesion molecule binding	signal transducer activity	signal transducer activity
	molecular transducer activity	molecular transducer activity	molecular transducer activity	kinase activator activity	molecular transducer activity	kinase activator activity	growth factor binding	growth factor binding	molecular transducer activity	molecular transducer activity
	receptor activity	receptor activity	receptor activity	signal transducer activity	receptor activity	protein binding	protein kinase activator activity	protein kinase activator activity	GTP binding	GTP binding
	transmembrane receptor activity	transmembrane receptor activity	transmembrane receptor activity	molecular transducer activity	transmembrane receptor activity	actin binding	receptor activity	receptor activity	guanyl nucleotide binding	guanyl nucleotide binding
	receptor binding	G-protein coupled receptor activity	G-protein coupled receptor activity	protein tyrosine kinase activator activity	cell adhesion molecule binding	signal transducer activity	glycosaminoglycan binding	glycosaminoglycan binding	guanyl ribonucleotide binding	guanyl ribonucleotide binding
	pattern binding	transmembrane receptor protein kinase activity	transmembrane receptor protein kinase activity	cell adhesion molecule binding	receptor binding	molecular transducer activity	pattern binding	pattern binding	receptor binding	receptor binding
	polysaccharide binding	pattern binding	pattern binding	transmembrane receptor activity	protein binding	cytoskeletal protein binding	integrin binding	integrin binding	ribonucleotide binding	ribonucleotide binding
	G-protein coupled receptor activity	polysaccharide binding	polysaccharide binding	receptor activity	transmembrane receptor protein kinase activity	profilin binding	polysaccharide binding	polysaccharide binding	purine ribonucleotide binding	purine ribonucleotide binding
	growth factor binding	growth factor binding	growth factor binding	protein binding	growth factor binding	protein tyrosine kinase activator activity	transmembrane receptor activity	transmembrane receptor activity	transmembrane receptor activity	transmembrane receptor activity
	GTP binding	carbohydrate binding	carbohydrate binding	protein kinase regulator activity	cytoskeletal protein binding	receptor activity	collagen binding	collagen binding	receptor activity	receptor activity

## Sheet: ES-Bivalent marked chromatin
Molecular function (MF) assciated with the top 10 Biological Function (BF) categories in methylated genes that are bivalent-marked in hESC
BF categories:	multicellular organismal process	system development	multicellular organismal development	cell differentiation	anatomical structure development	developmental process	cellular developmental process	organ development	nervous system development	generation of neurons
MF categories	sequence-specific DNA binding	sequence-specific DNA binding	transcription factor activity	transcription factor activity	sequence-specific DNA binding	transcription factor activity	sequence-specific DNA binding	transcription factor activity	sequence-specific DNA binding	sequence-specific DNA binding
	transcription factor activity	transcription factor activity	sequence-specific DNA binding	sequence-specific DNA binding	transcription factor activity	sequence-specific DNA binding	transcription factor activity	sequence-specific DNA binding	transcription regulator activity	transcription factor activity
	transcription regulator activity	transcription regulator activity	transcription regulator activity	transcription regulator activity	transcription regulator activity	transcription regulator activity	transcription regulator activity	transcription regulator activity	transcription factor activity	transcription regulator activity
	receptor binding	DNA binding	DNA binding	DNA binding	DNA binding	DNA binding	DNA binding	DNA binding	DNA binding	DNA binding
	DNA binding	nucleic acid binding	nucleic acid binding	nucleic acid binding	nucleic acid binding	nucleic acid binding	nucleic acid binding	nucleic acid binding	nucleic acid binding	nucleic acid binding
	protein binding	receptor binding	receptor binding	receptor binding	receptor binding	receptor binding	receptor binding	receptor binding	receptor binding	ephrin receptor binding
	nucleic acid binding	protein binding	protein binding	binding	protein binding	protein binding	binding	protein binding	ephrin receptor binding	receptor binding
	binding	binding	binding	protein binding	binding	binding	protein binding	binding	transmembrane receptor protein kinase activity	transmembrane receptor protein kinase activity
	signal transducer activity	transcription activator activity	transcription activator activity	growth factor activity	transcription activator activity	transcription activator activity	growth factor activity	transcription activator activity	transmembrane receptor protein tyrosine kinase activity	binding
	molecular transducer activity	growth factor activity	protein tyrosine kinase activity	transcription activator activity	transcription repressor activity	growth factor activity	transcription activator activity	growth factor activity	protein binding	transmembrane receptor protein tyrosine kinase activity
