# Supplementary material for: A DNA hypermethylation module for the stem/progenitor cell signature of cancer
Source: HighWire-hosted journal article supplement (doi:10.1101/gr.131169.111), 2012-03-05
Supplement: Table_S4.xlsx [file Table_S4.xlsx]

## Sheet: Supplementary Table4.xls
Colon	Lung	Breast	Pancreas	Leukemia	Gastric Carcinoma	Sarcoma
SW480	H1299	MCF10A	PL45	KG1A	AGS	U20S
SW620	H2122	MCF7	MIA	KG1	N87	HT1080
SW48	H1385	MDA.MB.468	PANC1	NB4	SNU1
RKO	H838	T47D	CAPAN1	K562	KATOIII
COLO320	H249	MDA.MB.231		Kasumi.1
COLO205	A549	BT474		U937
LOVO	H23	CAMA1
HT29	H157	MCF12A
CACO2	H520	HCC1937
DLD1	H2170	MDA.MB.453
HCT116	U1752
T84	H460
COLO201
SKCO1
SNUC1
SW626
