# Supplementary material for: A DNA hypermethylation module for the stem/progenitor cell signature of cancer
Source: HighWire-hosted journal article supplement (doi:10.1101/gr.131169.111), 2012-03-05
Supplement: Table_S5.xlsx [file Table_S5.xlsx]

## Sheet: TCGA Patient Samples
Lung	Colon	Breast
TCGA-21-1070-01A-01D-0689-05	TCGA-A6-2670-01A-02D-0820-05	TCGA-A2-A04P-01A-31D-A032-05
TCGA-21-1071-01A-01D-0689-05	TCGA-A6-2674-01A-02D-0820-05	TCGA-A2-A04Q-01A-21D-A032-05
TCGA-21-1072-01A-01D-0689-05	TCGA-A6-2677-01A-01D-0820-05	TCGA-A2-A04T-01A-21D-A032-05
TCGA-21-1075-01A-01D-0689-05	TCGA-A6-2678-01A-01D-0820-05	TCGA-A2-A04V-01A-21D-A032-05
TCGA-21-1076-01A-01D-0689-05	TCGA-A6-2683-01A-01D-0820-05	TCGA-A2-A04X-01A-21D-A032-05
TCGA-21-1076-01A-02D-0689-05	TCGA-AA-3514-01A-02D-0820-05	TCGA-A2-A04Y-01A-21D-A032-05
TCGA-21-1077-01A-01D-0689-05	TCGA-AA-3517-01A-01D-0820-05	TCGA-A2-A0CM-01A-31D-A032-05
TCGA-21-1078-01A-01D-0689-05	TCGA-AA-3519-01A-02D-0820-05	TCGA-A2-A0CP-01A-11D-A032-05
TCGA-21-1079-01A-01D-0689-05	TCGA-AA-3520-01A-01D-0820-05	TCGA-A2-A0CQ-01A-21D-A032-05
TCGA-21-1080-01A-01D-0689-05	TCGA-AA-3521-01A-01D-0820-05	TCGA-A2-A0CU-01A-12D-A032-05
TCGA-21-1081-01A-01D-0689-05	TCGA-AA-3522-01A-01D-0820-05	TCGA-A2-A0CX-01A-21D-A00Y-05
TCGA-21-1082-01A-01D-0689-05	TCGA-AA-3524-01A-02D-0820-05	TCGA-A2-A0CY-01A-12D-A032-05
TCGA-21-1083-01A-01D-0689-05	TCGA-AA-3526-01A-02D-0820-05	TCGA-A2-A0CZ-01A-11D-A032-05
TCGA-22-0940-01A-01D-0689-05	TCGA-AA-3527-01A-01D-0820-05	TCGA-A2-A0D0-01A-11D-A00Y-05
TCGA-22-0944-01A-01D-0689-05	TCGA-AA-3529-01A-02D-0820-05	TCGA-A2-A0D1-01A-11D-A032-05
TCGA-22-1000-01A-01D-0689-05	TCGA-AA-3531-01A-01D-0820-05	TCGA-A2-A0D2-01A-21D-A032-05
TCGA-22-1002-01A-01D-0689-05	TCGA-AA-3532-01A-01D-0820-05	TCGA-A2-A0D4-01A-11D-A00Y-05
TCGA-22-1005-01A-01D-0689-05	TCGA-AA-3534-01A-01D-0820-05	TCGA-A2-A0EM-01A-11D-A032-05
TCGA-22-1011-01A-01D-0689-05	TCGA-AA-3538-01A-01D-0820-05	TCGA-A2-A0EO-01A-11D-A032-05
TCGA-22-1012-01A-01D-0689-05	TCGA-AA-3542-01A-02D-0820-05	TCGA-A2-A0EQ-01A-11D-A032-05
TCGA-22-1016-01A-01D-0689-05	TCGA-AA-3544-01A-01D-0820-05	TCGA-A2-A0ER-01A-21D-A032-05
TCGA-56-1622-01A-01D-0689-05	TCGA-AA-3548-01A-01D-0820-05	TCGA-A2-A0ET-01A-31D-A032-05
TCGA-34-2596-01A-01D-0848-05	TCGA-AA-3549-01A-02D-0820-05	TCGA-A2-A0EV-01A-11D-A032-05
TCGA-34-2600-01A-01D-0848-05	TCGA-AA-3552-01A-01D-0820-05	TCGA-A2-A0EX-01A-21D-A032-05
TCGA-34-2604-01A-01D-0848-05	TCGA-AA-3553-01A-01D-0820-05	TCGA-A2-A0EY-01A-11D-A032-05
TCGA-34-2605-01A-01D-0848-05	TCGA-AA-3555-01A-01D-0820-05	TCGA-A7-A0CD-01A-11D-A00Y-05
TCGA-34-2608-01A-02D-0848-05	TCGA-AA-3556-01A-01D-0820-05	TCGA-A7-A0CE-01A-11D-A00Y-05
TCGA-34-2609-01A-01D-0848-05	TCGA-AA-3558-01A-01D-0820-05	TCGA-A7-A0CG-01A-11D-A00Y-05
TCGA-43-2576-01A-01D-0848-05	TCGA-AA-3560-01A-01D-0820-05	TCGA-A7-A0CH-01A-21D-A00Y-05
TCGA-43-2578-01A-01D-0848-05	TCGA-AA-3561-01A-01D-0820-05	TCGA-A7-A0CJ-01A-21D-A00Y-05
TCGA-43-2581-01A-01D-0848-05	TCGA-AA-3562-01A-02D-0820-05	TCGA-A7-A0DB-01A-11D-A00Y-05
TCGA-60-2695-01A-01D-0848-05	TCGA-A6-2672-01A-01D-0825-05	TCGA-A7-A0DC-01A-11D-A00Y-05
TCGA-60-2696-01A-01D-0848-05	TCGA-A6-2676-01A-01D-0825-05	TCGA-A8-A06N-01A-11D-A00Y-05
TCGA-60-2698-01A-01D-0848-05	TCGA-AA-3516-01A-02D-0825-05	TCGA-A8-A06O-01A-11D-A00Y-05
TCGA-60-2706-01A-01D-0848-05	TCGA-AA-3518-01A-02D-0825-05	TCGA-A8-A06P-01A-11D-A00Y-05
TCGA-60-2707-01A-01D-0848-05	TCGA-AA-3525-01A-02D-0825-05	TCGA-A8-A06Q-01A-11D-A032-05
TCGA-60-2708-01A-01D-0848-05	TCGA-AA-3543-01A-01D-0825-05	TCGA-A8-A06R-01A-11D-A00Y-05
TCGA-60-2710-01A-01D-0848-05	TCGA-AA-3554-01A-01D-0825-05	TCGA-A8-A06T-01A-11D-A00Y-05
TCGA-60-2711-01A-01D-0848-05	TCGA-AA-A00A-01A-01D-A004-05	TCGA-A8-A06U-01A-11D-A00Y-05
TCGA-60-2712-01A-01D-0848-05	TCGA-AA-A00D-01A-01D-A004-05	TCGA-A8-A06X-01A-21D-A00Y-05
TCGA-60-2713-01A-01D-0848-05	TCGA-AA-A00E-01A-01D-A004-05	TCGA-A8-A06Y-01A-21D-A00Y-05
TCGA-60-2714-01A-01D-0848-05	TCGA-AA-A00F-01A-01D-A004-05	TCGA-A8-A06Z-01A-11D-A00Y-05
TCGA-60-2715-01A-01D-0848-05	TCGA-AA-A00J-01A-02D-A004-05	TCGA-A8-A076-01A-21D-A00Y-05
TCGA-60-2716-01A-01D-0848-05	TCGA-AA-A00K-01A-02D-A004-05	TCGA-A8-A079-01A-21D-A00Y-05
TCGA-60-2719-01A-01D-0848-05	TCGA-AA-A00L-01A-01D-A004-05	TCGA-A8-A07B-01A-11D-A00Y-05
TCGA-60-2720-01A-01D-0848-05	TCGA-AA-A00Q-01A-01D-A004-05	TCGA-A8-A07C-01A-11D-A032-05
TCGA-60-2721-01A-01D-0848-05	TCGA-AA-A00R-01A-01D-A004-05	TCGA-A8-A07E-01A-11D-A032-05
TCGA-60-2722-01A-01D-0848-05	TCGA-AA-A00U-01A-01D-A004-05	TCGA-A8-A07F-01A-11D-A00Y-05
TCGA-60-2723-01A-01D-0848-05	TCGA-AA-A00W-01A-01D-A004-05	TCGA-A8-A07G-01A-11D-A032-05
TCGA-60-2724-01A-01D-0848-05	TCGA-AA-A00Z-01A-01D-A004-05	TCGA-A8-A07I-01A-11D-A00Y-05
TCGA-60-2726-01A-01D-0848-05	TCGA-AA-A01F-01A-01D-A004-05	TCGA-A8-A07J-01A-11D-A00Y-05
TCGA-66-2755-01A-01D-0848-05	TCGA-AA-A01G-01A-01D-A004-05	TCGA-A8-A07L-01A-11D-A00Y-05
TCGA-66-2756-01A-01D-0848-05	TCGA-AA-A01Q-01A-01D-A004-05	TCGA-A8-A07O-01A-11D-A00Y-05
TCGA-66-2757-01A-01D-0848-05	TCGA-AA-A004-01A-01D-A00B-05	TCGA-A8-A07P-01A-11D-A00Y-05
TCGA-66-2758-01A-02D-0848-05	TCGA-AA-A00N-01A-02D-A00B-05	TCGA-A8-A07R-01A-21D-A032-05
TCGA-66-2759-01A-01D-0848-05	TCGA-AA-A00O-01A-02D-A00B-05	TCGA-A8-A07S-01A-11D-A032-05
TCGA-66-2763-01A-01D-0848-05	TCGA-AA-A010-01A-01D-A00B-05	TCGA-A8-A07U-01A-11D-A032-05
TCGA-66-2765-01A-01D-0848-05	TCGA-AA-A017-01A-01D-A00B-05	TCGA-A8-A07W-01A-11D-A00Y-05
TCGA-66-2766-01A-01D-0848-05	TCGA-AA-A01C-01A-01D-A00B-05	TCGA-A8-A07Z-01A-11D-A00Y-05
TCGA-66-2767-01A-01D-0848-05	TCGA-AA-A01D-01A-01D-A00B-05	TCGA-A8-A081-01A-11D-A00Y-05
TCGA-66-2768-01A-01D-0848-05	TCGA-AA-A01I-01A-02D-A00B-05	TCGA-A8-A082-01A-11D-A00Y-05
TCGA-66-2769-01A-02D-0848-05	TCGA-AA-A01K-01A-01D-A00B-05	TCGA-A8-A083-01A-21D-A00Y-05
TCGA-66-2770-01A-01D-0848-05	TCGA-AA-A024-01A-02D-A00B-05	TCGA-A8-A084-01A-21D-A00Y-05
TCGA-66-2778-01A-02D-0848-05	TCGA-AA-A029-01A-01D-A00B-05	TCGA-A8-A085-01A-11D-A00Y-05
TCGA-66-2780-01A-01D-0848-05	TCGA-AA-A02E-01A-01D-A00B-05	TCGA-A8-A086-01A-11D-A00Y-05
TCGA-66-2781-01A-01D-0848-05	TCGA-AA-A02F-01A-01D-A00B-05	TCGA-A8-A08A-01A-11D-A00Y-05
TCGA-66-2782-01A-01D-0848-05	TCGA-AA-A02H-01A-01D-A00B-05	TCGA-A8-A08B-01A-11D-A00Y-05
TCGA-66-2785-01A-01D-0848-05	TCGA-AA-A02J-01A-01D-A00B-05	TCGA-A8-A08C-01A-11D-A00Y-05
TCGA-66-2786-01A-01D-0848-05	TCGA-AA-A02R-01A-01D-A00B-05	TCGA-A8-A08F-01A-11D-A00Y-05
TCGA-18-3406-01A-01D-0979-05	TCGA-AA-A02W-01A-01D-A00B-05	TCGA-A8-A08G-01A-11D-A00Y-05
TCGA-18-3406-11A-01D-0979-05	TCGA-AA-3664-01A-01D-0904-05	TCGA-A8-A08H-01A-21D-A00Y-05
TCGA-18-3407-01A-01D-0979-05	TCGA-AA-3666-01A-02D-0904-05	TCGA-A8-A08I-01A-11D-A00Y-05
TCGA-18-3407-11A-01D-0979-05	TCGA-AA-3667-01A-01D-0904-05	TCGA-A8-A08J-01A-11D-A00Y-05
TCGA-18-3408-01A-01D-0979-05	TCGA-AA-3672-01A-01D-0904-05	TCGA-A8-A08L-01A-11D-A00Y-05
TCGA-18-3408-11A-01D-0979-05	TCGA-AA-3673-01A-01D-0904-05	TCGA-A8-A08P-01A-11D-A00Y-05
TCGA-18-3409-01A-01D-0979-05	TCGA-AA-3675-01A-02D-0904-05	TCGA-A8-A08R-01A-11D-A032-05
TCGA-18-3409-11A-01D-0979-05	TCGA-AA-3678-01A-01D-0904-05	TCGA-A8-A08S-01A-11D-A032-05
TCGA-18-3410-01A-01D-0979-05	TCGA-AA-3679-01A-02D-0904-05	TCGA-A8-A08T-01A-21D-A00Y-05
TCGA-18-3410-11A-01D-0979-05	TCGA-AA-3680-01A-01D-0904-05	TCGA-A8-A08X-01A-21D-A00Y-05
TCGA-18-3411-01A-01D-0979-05	TCGA-AA-3681-01A-01D-0904-05	TCGA-A8-A08Z-01A-21D-A00Y-05
TCGA-18-3411-11A-01D-0979-05	TCGA-AA-3684-01A-02D-0904-05	TCGA-A8-A090-01A-11D-A00Y-05
TCGA-18-3412-01A-01D-0979-05	TCGA-AA-3685-01A-02D-0904-05	TCGA-A8-A091-01A-11D-A00Y-05
TCGA-18-3412-11A-01D-0979-05	TCGA-AA-3688-01A-01D-0904-05	TCGA-A8-A092-01A-11D-A00Y-05
TCGA-18-3414-01A-01D-0979-05	TCGA-AA-3692-01A-01D-0904-05	TCGA-A8-A093-01A-11D-A00Y-05
TCGA-18-3414-11A-01D-0979-05	TCGA-AA-3693-01A-01D-0904-05	TCGA-A8-A094-01A-11D-A00Y-05
TCGA-18-3415-01A-01D-0979-05	TCGA-AA-3695-01A-01D-0904-05	TCGA-A8-A095-01A-11D-A00Y-05
TCGA-18-3415-11A-01D-0979-05	TCGA-AA-3696-01A-01D-0904-05	TCGA-A8-A096-01A-11D-A00Y-05
TCGA-18-3416-01A-01D-0979-05	TCGA-AA-3715-01A-01D-0904-05	TCGA-A8-A097-01A-11D-A032-05
TCGA-18-3416-11A-01D-0979-05	TCGA-AA-3812-01A-01D-0904-05	TCGA-A8-A099-01A-11D-A00Y-05
TCGA-18-3419-01A-01D-0979-05	TCGA-AA-3814-01A-01D-0904-05	TCGA-A8-A09A-01A-11D-A00Y-05
TCGA-18-3419-11A-01D-0979-05	TCGA-AA-3818-01A-01D-0904-05	TCGA-A8-A09B-01A-11D-A00Y-05
TCGA-18-3421-01A-01D-0979-05	TCGA-AA-3819-01A-01D-0904-05	TCGA-A8-A09C-01A-11D-A00Y-05
TCGA-18-3421-11A-01D-0979-05	TCGA-AA-3831-01A-01D-0904-05	TCGA-A8-A09D-01A-11D-A00Y-05
TCGA-37-3789-01A-01D-0979-05	TCGA-AA-3833-01A-01D-0904-05	TCGA-A8-A09E-01A-11D-A00Y-05
TCGA-37-3792-01A-01D-0979-05	TCGA-AA-3837-01A-01D-0904-05	TCGA-A8-A09G-01A-21D-A00Y-05
TCGA-43-3394-01A-01D-0979-05	TCGA-AA-3848-01A-01D-0904-05	TCGA-A8-A09I-01A-22D-A032-05
TCGA-43-3920-01A-01D-0979-05	TCGA-AA-3852-01A-01D-0904-05	TCGA-A8-A09K-01A-11D-A00Y-05
TCGA-46-3765-01A-01D-0979-05	TCGA-AA-3854-01A-01D-0904-05	TCGA-A8-A09M-01A-11D-A00Y-05
TCGA-46-3766-01A-01D-0979-05	TCGA-AA-3856-01A-01D-0904-05	TCGA-A8-A09N-01A-11D-A00Y-05
TCGA-46-3767-01A-01D-0979-05	TCGA-AA-3858-01A-01D-0904-05	TCGA-A8-A09Q-01A-11D-A00Y-05
TCGA-46-3768-01A-01D-0979-05	TCGA-AA-3860-01A-02D-0904-05	TCGA-A8-A09R-01A-11D-A00Y-05
TCGA-46-3769-01A-01D-0979-05	TCGA-AA-3875-01A-01D-0904-05	TCGA-A8-A09T-01A-11D-A00Y-05
TCGA-66-2727-01A-01D-0979-05	TCGA-A6-3807-01A-01D-1020-05	TCGA-A8-A09V-01A-11D-A032-05
TCGA-66-2727-11A-01D-0979-05	TCGA-A6-3807-11A-01D-1020-05	TCGA-A8-A09W-01A-11D-A00Y-05
TCGA-66-2734-01A-01D-0979-05	TCGA-A6-3808-01A-01D-1020-05	TCGA-A8-A09X-01A-11D-A00Y-05
TCGA-66-2734-11A-01D-0979-05	TCGA-A6-3808-11A-01D-1020-05	TCGA-A8-A09Z-01A-11D-A00Y-05
TCGA-66-2737-01A-01D-0979-05	TCGA-A6-3809-01A-01D-1020-05	TCGA-A8-A0A1-01A-11D-A00Y-05
TCGA-66-2737-11A-01D-0979-05	TCGA-A6-3809-11A-01D-1020-05	TCGA-A8-A0A2-01A-11D-A032-05
TCGA-66-2742-01A-01D-0979-05	TCGA-A6-3810-01A-01D-1020-05	TCGA-A8-A0A4-01A-11D-A00Y-05
TCGA-66-2742-11A-01D-0979-05	TCGA-A6-3810-11A-01D-1020-05	TCGA-A8-A0A7-01A-11D-A00Y-05
TCGA-66-2744-01A-01D-0979-05	TCGA-AA-3530-01A-01D-1020-05	TCGA-A8-A0A9-01A-11D-A00Y-05
TCGA-66-2744-11A-01D-0979-05	TCGA-AA-3710-01A-01D-1020-05	TCGA-A8-A0AB-01A-11D-A032-05
TCGA-66-2753-01A-01D-0979-05	TCGA-AA-3811-01A-01D-1020-05	TCGA-AN-A03X-01A-21D-A00Y-05
TCGA-66-2753-11A-01D-0979-05	TCGA-AA-3815-01A-01D-1020-05	TCGA-AN-A03Y-01A-21D-A00Y-05
TCGA-66-2754-01A-01D-0979-05	TCGA-AA-3821-01A-01D-1020-05	TCGA-AN-A041-01A-11D-A032-05
TCGA-66-2754-11A-01D-0979-05	TCGA-AA-3842-01A-01D-1020-05	TCGA-AN-A046-01A-21D-A032-05
TCGA-66-2771-01A-01D-0979-05	TCGA-AA-3844-01A-01D-1020-05	TCGA-AN-A049-01A-21D-A00Y-05
TCGA-66-2771-11A-01D-0979-05	TCGA-AA-3845-01A-01D-1020-05	TCGA-AN-A04A-01A-21D-A032-05
TCGA-66-2787-01A-01D-0979-05	TCGA-AA-3846-01A-01D-1020-05	TCGA-AN-A04C-01A-21D-A032-05
TCGA-66-2787-11A-01D-0979-05	TCGA-AA-3850-01A-01D-1020-05	TCGA-AN-A04D-01A-21D-A032-05
TCGA-66-2788-01A-01D-0979-05	TCGA-AA-3851-01A-01D-1020-05	TCGA-AN-A0AJ-01A-11D-A00Y-05
TCGA-66-2788-11A-01D-0979-05	TCGA-AA-3855-01A-01D-1020-05	TCGA-AN-A0AK-01A-21D-A00Y-05
TCGA-66-2789-01A-01D-0979-05	TCGA-AA-3861-01A-01D-1020-05	TCGA-AN-A0AL-01A-11D-A00Y-05
TCGA-66-2789-11A-01D-0979-05	TCGA-AA-3862-01A-01D-1020-05	TCGA-AN-A0AM-01A-11D-A032-05
TCGA-66-2790-01A-01D-0979-05	TCGA-AA-3864-01A-01D-1020-05	TCGA-AN-A0AR-01A-11D-A00Y-05
TCGA-66-2790-11A-01D-0979-05	TCGA-AA-3866-01A-01D-1020-05	TCGA-AN-A0AS-01A-11D-A00Y-05
TCGA-66-2791-01A-01D-0979-05	TCGA-AA-3867-01A-01D-1020-05	TCGA-AN-A0AT-01A-11D-A032-05
TCGA-66-2791-11A-01D-0979-05	TCGA-AA-3869-01A-01D-1020-05	TCGA-AN-A0FD-01A-11D-A032-05
TCGA-66-2792-01A-01D-0979-05	TCGA-AA-3870-01A-01D-1020-05	TCGA-AN-A0FE-01A-11D-A00Y-05
TCGA-66-2792-11A-01D-0979-05	TCGA-AA-3872-01A-01D-1020-05	TCGA-AN-A0FF-01A-11D-A032-05
TCGA-66-2795-01A-02D-0979-05	TCGA-AA-3877-01A-01D-1020-05	TCGA-AN-A0FG-01A-11D-A00Y-05
TCGA-66-2795-11A-01D-0979-05	TCGA-AA-3930-01A-01D-1020-05	TCGA-AN-A0FJ-01A-11D-A00Y-05
TCGA-18-4083-01A-01D-1096-05	TCGA-AA-3939-01A-01D-1020-05	TCGA-AN-A0FK-01A-11D-A032-05
TCGA-18-4086-01A-01D-1096-05	TCGA-AA-3941-01A-01D-1020-05	TCGA-AN-A0FL-01A-11D-A032-05
TCGA-37-4129-01A-01D-1096-05	TCGA-AA-3947-01A-01D-1020-05	TCGA-AN-A0FN-01A-11D-A032-05
TCGA-37-4130-01A-01D-1096-05	TCGA-AA-3949-01A-01D-1020-05	TCGA-AN-A0FS-01A-11D-A032-05
TCGA-37-4132-01A-01D-1096-05	TCGA-AA-3950-01A-02D-1020-05	TCGA-AN-A0FT-01A-11D-A032-05
TCGA-37-4133-01A-01D-1096-05	TCGA-AA-3952-01A-01D-1020-05	TCGA-AN-A0FV-01A-11D-A00Y-05
TCGA-37-4135-01A-01D-1096-05	TCGA-AA-3955-01A-02D-1020-05	TCGA-AN-A0FW-01A-11D-A032-05
TCGA-37-4141-01A-02D-1096-05	TCGA-AA-3956-01A-02D-1020-05	TCGA-AN-A0FX-01A-11D-A032-05
TCGA-51-4079-01A-01D-1096-05	TCGA-AA-3968-01A-01D-1020-05	TCGA-AN-A0FY-01A-11D-A032-05
TCGA-51-4080-01A-01D-1096-05	TCGA-AA-3970-01A-01D-1020-05	TCGA-AN-A0FZ-01A-11D-A032-05
TCGA-51-4081-01A-01D-1096-05	TCGA-AA-3971-01A-01D-1020-05	TCGA-AN-A0G0-01A-11D-A032-05
TCGA-22-4591-01A-01D-1198-05	TCGA-AA-3972-01A-01D-1020-05	TCGA-AO-A03O-01A-11D-A00Y-05
TCGA-22-4594-01A-01D-1198-05	TCGA-AA-3973-01A-01D-1020-05	TCGA-AO-A03P-01A-11D-A00Y-05
TCGA-22-4595-01A-01D-1198-05	TCGA-AA-3975-01A-01D-1020-05	TCGA-AO-A03R-01A-21D-A032-05
TCGA-22-4596-01A-01D-1198-05	TCGA-AA-3976-01A-01D-1020-05	TCGA-AO-A03T-01A-21D-A032-05
TCGA-22-4604-01A-01D-1198-05	TCGA-AA-3977-01A-01D-1020-05	TCGA-AO-A0J2-01A-11D-A032-05
TCGA-22-4607-01A-01D-1198-05	TCGA-AA-3979-01A-01D-1020-05	TCGA-AO-A0J3-01A-11D-A032-05
TCGA-33-4532-01A-01D-1198-05	TCGA-AA-3980-01A-02D-1020-05	TCGA-AO-A0J4-01A-11D-A032-05
TCGA-33-4533-01A-01D-1198-05	TCGA-AA-3982-01A-02D-1020-05	TCGA-AO-A0J5-01A-11D-A032-05
TCGA-33-4538-01A-01D-1198-05	TCGA-AA-3984-01A-02D-1020-05	TCGA-AO-A0J6-01A-11D-A032-05
TCGA-33-4547-01A-01D-1198-05	TCGA-AA-3986-01A-02D-1020-05	TCGA-AO-A0J7-01A-11D-A032-05
TCGA-37-3783-01A-01D-1198-05	TCGA-AA-3989-01A-01D-1020-05	TCGA-AO-A0J8-01A-21D-A032-05
TCGA-60-2725-01A-01D-1198-05	TCGA-AA-3675-01A-02D-1110-05	TCGA-AO-A0J9-01A-11D-A032-05
TCGA-66-2773-01A-01D-1198-05	TCGA-AA-3966-01A-01D-1110-05	TCGA-AQ-A04J-01A-02D-A032-05
TCGA-66-2777-01A-01D-1198-05	TCGA-AA-3970-01A-01D-1110-05	TCGA-B6-A0I2-01A-11D-A032-05
TCGA-66-2783-01A-01D-1198-05	TCGA-AA-3994-01A-01D-1110-05	TCGA-B6-A0I5-01A-11D-A032-05
TCGA-66-2793-01A-01D-1198-05	TCGA-AY-4070-01A-01D-1110-05	TCGA-B6-A0I6-01A-11D-A032-05
TCGA-66-2794-01A-01D-1198-05	TCGA-AY-4071-01A-01D-1110-05	TCGA-B6-A0I8-01A-11D-A032-05
TCGA-66-2800-01A-01D-1198-05	TCGA-AA-A01P-01A-21D-A081-05	TCGA-B6-A0I9-01A-11D-A032-05
TCGA-35-3615-01A-01D-0945-05	TCGA-AA-A01P-11A-11D-A081-05	TCGA-B6-A0IA-01A-11D-A032-05
TCGA-44-2655-01A-01D-0945-05	TCGA-AA-A01R-01A-21D-A081-05	TCGA-B6-A0IB-01A-11D-A032-05
TCGA-44-2656-01A-02D-0945-05	TCGA-AA-A01R-11A-12D-A081-05	TCGA-B6-A0IC-01A-11D-A032-05
TCGA-44-2659-01A-01D-0945-05	TCGA-AA-A01S-01A-21D-A081-05	TCGA-B6-A0IE-01A-11D-A032-05
TCGA-44-2662-01A-01D-0945-05	TCGA-AA-A01S-11A-21D-A081-05	TCGA-B6-A0IG-01A-11D-A032-05
TCGA-44-2665-01A-01D-0945-05	TCGA-AA-A01T-01A-21D-A081-05	TCGA-B6-A0IJ-01A-11D-A032-05
TCGA-44-2666-01A-01D-0945-05	TCGA-AA-A01T-11A-11D-A081-05	TCGA-B6-A0IM-01A-11D-A032-05
TCGA-44-2668-01A-01D-0945-05	TCGA-AA-A01V-01A-23D-A081-05	TCGA-B6-A0IN-01A-11D-A032-05
TCGA-55-1592-01A-01D-0945-05	TCGA-AA-A01V-11A-11D-A081-05	TCGA-B6-A0IO-01A-11D-A032-05
TCGA-55-1592-11A-01D-0945-05	TCGA-AA-A01X-01A-21D-A081-05	TCGA-B6-A0IP-01A-11D-A032-05
TCGA-55-1594-01A-01D-0945-05	TCGA-AA-A01X-11A-11D-A081-05	TCGA-B6-A0IQ-01A-11D-A032-05
TCGA-55-1594-11A-01D-0945-05	TCGA-AA-A01Z-01A-11D-A081-05	TCGA-BH-A0AY-01A-21D-A00Y-05
TCGA-55-1595-01A-01D-0945-05	TCGA-AA-A01Z-11A-11D-A081-05	TCGA-BH-A0B4-01A-11D-A00Y-05
TCGA-55-1595-11A-01D-0945-05	TCGA-AA-A022-01A-21D-A081-05	TCGA-BH-A0BD-01A-11D-A032-05
TCGA-55-1596-01A-01D-0945-05	TCGA-AA-A022-11A-11D-A081-05	TCGA-BH-A0BV-01A-11D-A00Y-05
TCGA-55-1596-11A-01D-0945-05	TCGA-AA-A02K-01A-21D-A081-05	TCGA-BH-A0DZ-01A-11D-A00Y-05
TCGA-64-1676-01A-01D-0945-05	TCGA-AA-A02O-01A-21D-A081-05	TCGA-BH-A0E6-01A-11D-A032-05
TCGA-64-1677-01A-01D-0945-05	TCGA-AA-A02O-11A-11D-A081-05	TCGA-BH-A0E7-01A-11D-A032-05
TCGA-64-1678-01A-01D-0945-05	TCGA-AA-A02Y-01A-43D-A081-05	TCGA-BH-A0EB-01A-11D-A032-05
TCGA-64-1680-01A-02D-0945-05	TCGA-AA-A03F-01A-11D-A081-05	TCGA-BH-A0EE-01A-11D-A032-05
TCGA-67-3770-01A-01D-0945-05	TCGA-AA-A03F-11A-12D-A081-05	TCGA-BH-A0HL-01A-11D-A032-05
TCGA-67-3771-01A-01D-0945-05	TCGA-AA-A03J-01A-21D-A081-05	TCGA-BH-A0HO-01A-11D-A032-05
TCGA-67-3772-01A-01D-0945-05	TCGA-AA-A03J-11A-11D-A081-05	TCGA-BH-A0HQ-01A-11D-A032-05
TCGA-67-3773-01A-01D-0945-05	NA	TCGA-BH-A0HU-01A-11D-A032-05
TCGA-67-3774-01A-01D-0945-05	NA	TCGA-BH-A0HW-01A-11D-A032-05
TCGA-05-4244-01A-01D-1104-05	NA	NA
TCGA-05-4249-01A-01D-1104-05	NA	NA
TCGA-05-4250-01A-01D-1104-05	NA	NA
TCGA-35-3621-01A-01D-1104-05	NA	NA
TCGA-35-4122-01A-01D-1104-05	NA	NA
TCGA-35-4123-01A-01D-1104-05	NA	NA
TCGA-44-2657-01A-01D-1104-05	NA	NA
TCGA-44-2659-01A-01D-1104-05	NA	NA
TCGA-44-2661-01A-01D-1104-05	NA	NA
TCGA-44-3398-01A-01D-1104-05	NA	NA
TCGA-44-3918-01A-01D-1104-05	NA	NA
TCGA-44-3918-11A-01D-1104-05	NA	NA
TCGA-44-3919-01A-02D-1104-05	NA	NA
TCGA-44-3919-11A-01D-1104-05	NA	NA
TCGA-44-4112-01A-01D-1104-05	NA	NA
TCGA-44-4112-11A-01D-1104-05	NA	NA
TCGA-17-Z000-01A-01D-0752-05	NA	NA
TCGA-17-Z001-01A-01D-0752-05	NA	NA
TCGA-17-Z002-01A-01D-0752-05	NA	NA
TCGA-17-Z003-01A-01D-0752-05	NA	NA
TCGA-17-Z004-01A-01D-0752-05	NA	NA
TCGA-17-Z005-01A-01D-0752-05	NA	NA
TCGA-17-Z006-01A-01D-0752-05	NA	NA
TCGA-17-Z007-01A-01D-0752-05	NA	NA
TCGA-17-Z008-01A-01D-0752-05	NA	NA
TCGA-17-Z009-01A-01D-0752-05	NA	NA
TCGA-17-Z010-01A-01D-0752-05	NA	NA
TCGA-17-Z011-01A-01D-0752-05	NA	NA
TCGA-17-Z012-01A-01D-0752-05	NA	NA
TCGA-17-Z013-01A-01D-0752-05	NA	NA
TCGA-17-Z014-01A-01D-0752-05	NA	NA
TCGA-17-Z015-01A-01D-0752-05	NA	NA
TCGA-17-Z016-01A-01D-0752-05	NA	NA
TCGA-17-Z017-01A-01D-0752-05	NA	NA
TCGA-17-Z018-01A-01D-0752-05	NA	NA
TCGA-17-Z019-01A-01D-0752-05	NA	NA
TCGA-17-Z020-01A-01D-0752-05	NA	NA
TCGA-17-Z022-01A-01D-0752-05	NA	NA
TCGA-17-Z023-01A-01D-0752-05	NA	NA
TCGA-17-Z024-01A-01D-0752-05	NA	NA
TCGA-17-Z025-01A-01D-0752-05	NA	NA
TCGA-17-Z026-01A-01D-0752-05	NA	NA
TCGA-17-Z027-01A-01D-0752-05	NA	NA
TCGA-17-Z028-01A-01D-0752-05	NA	NA
TCGA-17-Z030-01A-01D-0752-05	NA	NA
TCGA-17-Z031-01A-01D-0752-05	NA	NA
TCGA-17-Z032-01A-01D-0752-05	NA	NA
TCGA-17-Z033-01A-01D-0752-05	NA	NA
TCGA-17-Z034-01A-01D-0752-05	NA	NA
TCGA-17-Z035-01A-01D-0752-05	NA	NA
TCGA-17-Z036-01A-01D-0752-05	NA	NA
TCGA-17-Z037-01A-01D-0752-05	NA	NA
TCGA-17-Z038-01A-01D-0752-05	NA	NA
TCGA-17-Z039-01A-01D-0752-05	NA	NA
TCGA-17-Z040-01A-01D-0752-05	NA	NA
TCGA-17-Z041-01A-01D-0752-05	NA	NA
TCGA-17-Z042-01A-01D-0752-05	NA	NA
TCGA-17-Z043-01A-01D-0752-05	NA	NA
TCGA-17-Z044-01A-01D-0752-05	NA	NA
TCGA-17-Z045-01A-01D-0752-05	NA	NA
TCGA-17-Z046-01A-01D-0752-05	NA	NA
TCGA-17-Z048-01A-01D-0752-05	NA	NA
TCGA-17-Z049-01A-01D-0752-05	NA	NA
TCGA-17-Z050-01A-01D-0752-05	NA	NA
TCGA-17-Z051-01A-01D-0752-05	NA	NA
TCGA-17-Z052-01A-01D-0752-05	NA	NA
TCGA-17-Z053-01A-01D-0752-05	NA	NA
TCGA-17-Z054-01A-01D-0752-05	NA	NA
TCGA-17-Z056-01A-01D-0752-05	NA	NA
TCGA-17-Z058-01A-01D-0752-05	NA	NA
TCGA-17-Z059-01A-01D-0752-05	NA	NA
TCGA-17-Z060-01A-01D-0752-05	NA	NA
TCGA-17-Z061-01A-01D-0752-05	NA	NA
TCGA-17-Z062-01A-01D-0752-05	NA	NA
TCGA-05-4382-01A-01D-1205-05	NA	NA
TCGA-05-4389-01A-01D-1205-05	NA	NA
TCGA-05-4395-01A-01D-1205-05	NA	NA
TCGA-05-4397-01A-01D-1205-05	NA	NA
TCGA-05-4398-01A-01D-1205-05	NA	NA
TCGA-05-4402-01A-01D-1205-05	NA	NA
TCGA-05-4403-01A-01D-1205-05	NA	NA
TCGA-05-4418-01A-01D-1205-05	NA	NA
TCGA-05-4420-01A-01D-1205-05	NA	NA
TCGA-05-4422-01A-01D-1205-05	NA	NA
TCGA-05-4426-01A-01D-1205-05	NA	NA
TCGA-05-4430-01A-02D-1205-05	NA	NA
TCGA-05-4432-01A-01D-1205-05	NA	NA
TCGA-05-4434-01A-01D-1205-05	NA	NA
TCGA-38-4625-01A-01D-1205-05	NA	NA
TCGA-38-4626-01A-01D-1205-05	NA	NA
TCGA-38-4627-01A-01D-1205-05	NA	NA
TCGA-38-4628-01A-01D-1205-05	NA	NA
TCGA-38-4628-11A-01D-1205-05	NA	NA
TCGA-38-4629-01A-02D-1205-05	NA	NA
TCGA-38-4629-11A-01D-1205-05	NA	NA
TCGA-38-4630-01A-01D-1205-05	NA	NA
TCGA-38-4630-11A-01D-1205-05	NA	NA
TCGA-44-3396-01A-01D-1205-05	NA	NA
TCGA-49-4486-01A-01D-1205-05	NA	NA
TCGA-49-4486-11A-01D-1205-05	NA	NA
TCGA-49-4494-01A-01D-1205-05	NA	NA
TCGA-49-4494-11A-01D-1205-05	NA	NA
TCGA-49-4501-01A-01D-1205-05	NA	NA
TCGA-49-4501-11A-01D-1205-05	NA	NA
TCGA-49-4505-01A-01D-1205-05	NA	NA
TCGA-49-4505-11A-01D-1205-05	NA	NA
TCGA-49-4506-01A-01D-1205-05	NA	NA
TCGA-49-4506-11A-01D-1205-05	NA	NA
TCGA-49-4507-01A-01D-1205-05	NA	NA
TCGA-49-4507-11A-01D-1205-05	NA	NA
TCGA-49-4510-01A-01D-1205-05	NA	NA
TCGA-49-4510-11A-01D-1205-05	NA	NA
TCGA-73-4659-01A-01D-1205-05	NA	NA
TCGA-73-4659-11A-01D-1205-05	NA	NA
TCGA-73-4662-01A-01D-1205-05	NA	NA
TCGA-73-4662-11A-01D-1205-05	NA	NA
TCGA-73-4666-01A-01D-1205-05	NA	NA
TCGA-73-4666-11A-01D-1205-05	NA	NA
TCGA-73-4668-01A-01D-1205-05	NA	NA
TCGA-73-4668-11A-01D-1205-05	NA	NA
TCGA-73-4670-01A-01D-1205-05	NA	NA
TCGA-73-4670-11A-01D-1205-05	NA	NA
TCGA-73-4675-01A-01D-1205-05	NA	NA
TCGA-73-4675-11A-01D-1205-05	NA	NA
TCGA-73-4677-01A-01D-1205-05	NA	NA
TCGA-73-4677-11A-01D-1205-05	NA	NA
