# Supplementary material for: A DNA hypermethylation module for the stem/progenitor cell signature of cancer
Source: HighWire-hosted journal article supplement (doi:10.1101/gr.131169.111), 2012-03-05
Supplement: Table_S6.xlsx [file Table_S6.xlsx]

## Sheet: HSC_H3K4Me3_peaks
Chr	Start	End	Length	Tags	Pval(-10*LOG10)	Fold enrichment
chr1	703249	703967	719	14	156.39	71.34
chr1	704135	704654	520	14	176.82	53.5
chr1	752134	752881	748	16	167.98	65.39
chr1	829362	830014	653	8	81.16	29.72
chr1	835008	835765	758	15	167.09	59.45
chr1	848712	850970	2259	63	720.75	83.22
chr1	865308	866028	721	26	341.56	107
chr1	866117	866700	584	6	60.5	23.78
chr1	866866	868232	1367	24	241.55	41.61
chr1	883628	884831	1204	69	1001.29	154.56
chr1	885457	887006	1550	32	336.87	65.39
chr1	891406	892743	1338	22	217	41.61
chr1	904035	904563	529	6	63.33	29.72
chr1	923573	924753	1181	28	314.48	77.28
chr1	924881	926449	1569	28	280.07	53.5
chr1	926807	927243	437	6	68.84	29.72
chr1	938170	939495	1326	49	625.88	136.73
chr1	944420	946338	1919	60	717.12	95.11
chr1	953015	953590	576	6	60.89	23.78
chr1	958232	959391	1160	20	203.37	53.5
chr1	965296	966494	1199	17	161.55	35.67
chr1	974163	974699	537	9	101.9	41.61
chr1	975122	975899	778	7	63.31	29.72
chr1	984215	985362	1148	21	217.86	35.67
chr1	985483	986073	591	7	72.25	23.78
chr1	988922	989882	961	16	164.54	47.56
chr1	993602	994940	1339	27	285.1	83.22
chr1	996930	997786	857	16	158.9	53.5
chr1	1040305	1040793	489	6	65.59	29.72
chr1	1040947	1042464	1518	42	487.6	95.11
chr1	1047168	1047734	567	6	61.34	17.83
chr1	1062082	1062882	801	11	110.08	29.72
chr1	1082801	1083564	764	13	138.89	47.56
chr1	1091958	1092778	821	9	84.4	35.67
chr1	1125996	1127147	1152	16	151.81	35.67
chr1	1138618	1139214	597	6	59.87	23.78
chr1	1142332	1143142	811	12	122.29	35.67
chr1	1156041	1158922	2882	154	2151.22	196.17
chr1	1171698	1172301	604	9	97.01	29.72
chr1	1198028	1199959	1932	70	876.55	112.95
chr1	1218571	1219079	509	6	64.44	23.78
chr1	1219173	1219732	560	9	100.15	47.56
chr1	1232023	1234894	2872	112	1421.06	118.89
chr1	1237260	1237642	383	8	99.49	47.56
chr1	1247675	1248282	608	7	71.32	23.78
chr1	1249052	1250891	1840	71	907.94	112.95
chr1	1261282	1261909	628	12	136.11	47.56
chr1	1273144	1275318	2175	92	1204.55	148.62
chr1	1279624	1281013	1390	23	226.51	47.56
chr1	1299606	1301363	1758	72	938.83	148.62
chr1	1323144	1325837	2694	144	2013.72	148.62
chr1	1331603	1333957	2355	114	1551.83	178.34
chr1	1344757	1345974	1218	22	225.97	53.5
chr1	1352462	1353194	733	17	198.41	71.34
chr1	1359022	1359720	699	8	78.65	23.78
chr1	1360419	1361742	1324	25	258.56	53.5
chr1	1363330	1363793	464	6	67.11	23.78
chr1	1364456	1365255	800	15	163.48	47.56
chr1	1396165	1398241	2077	63	743.44	101.06
chr1	1436456	1438293	1838	79	1043.82	172.39
chr1	1464962	1466243	1282	46	583.33	112.95
chr1	1498638	1501097	2460	159	2350.41	208.06
chr1	1522531	1523006	476	8	92.94	41.61
chr1	1524405	1526172	1768	51	595.79	89.17
chr1	1540199	1541922	1724	69	894.02	184.28
chr1	1554163	1555120	958	18	191.99	41.61
chr1	1555234	1556291	1058	16	157.77	35.67
chr1	1556464	1556992	529	6	63.33	29.72
chr1	1557397	1557816	420	7	83.57	35.67
chr1	1580085	1580854	770	24	301.78	95.11
chr1	1645049	1646013	965	14	138.06	35.67
chr1	1698649	1700595	1947	76	973.69	112.95
chr1	1703334	1704026	693	8	78.97	29.72
chr1	1810205	1813718	3514	133	1665.07	148.62
chr1	1829821	1830876	1056	28	328.12	65.39
chr1	1840048	1840981	934	13	127.26	41.61
chr1	1924858	1925605	748	8	64.58	29.72
chr1	1940164	1941259	1096	25	279.1	83.22
chr1	1970886	1972738	1853	52	600.81	95.11
chr1	2054187	2055054	868	15	158.05	47.56
chr1	2110896	2111572	677	12	132.03	41.61
chr1	2115323	2116667	1345	38	446.99	95.11
chr1	2120769	2121243	475	12	151.35	59.45
chr1	2125663	2127386	1724	42	464.57	53.5
chr1	2147946	2151189	3244	176	2465.63	225.89
chr1	2230779	2231278	500	10	119.06	53.5
chr1	2235762	2237019	1258	34	396.02	95.11
chr1	2276192	2276831	640	9	94.62	35.67
chr1	2312016	2314250	2235	97	1279.18	172.39
chr1	2332957	2335013	2057	85	1106.52	107
chr1	2364493	2365640	1148	19	190.89	47.56
chr1	2446536	2448171	1636	74	995.87	160.5
chr1	2450441	2451919	1479	28	287.19	65.39
chr1	2461775	2462428	654	12	133.9	47.56
chr1	2467380	2468640	1261	23	236.21	47.56
chr1	2485623	2486762	1140	20	204.89	65.39
chr1	2506774	2509314	2541	61	659.6	83.22
chr1	2549964	2550524	561	6	61.64	23.78
chr1	2563700	2565150	1451	51	639.28	154.56
chr1	2695978	2697152	1175	16	150.43	35.67
chr1	2924824	2925209	386	7	85.2	41.61
chr1	2933865	2934624	760	9	87.55	41.61
chr1	2974039	2977813	3775	112	1290.16	112.95
chr1	2979796	2980458	663	10	106.13	35.67
chr1	2984997	2985501	505	6	64.66	29.72
chr1	3092980	3093526	547	6	62.37	23.78
chr1	3296187	3296566	380	7	85.2	41.61
chr1	3299797	3301151	1355	31	340.83	53.5
chr1	3318994	3319462	469	6	66.8	23.78
chr1	3360568	3361405	838	14	146.82	41.61
chr1	3397535	3398132	598	7	59.82	23.78
chr1	3436533	3437129	597	6	59.87	17.83
chr1	3437181	3438446	1266	41	488.57	77.28
chr1	3452922	3453506	585	6	60.45	23.78
chr1	3504855	3505340	486	13	165.45	71.34
chr1	3517144	3518890	1747	31	293.51	71.34
chr1	3530621	3532506	1886	71	900.38	148.62
chr1	3555618	3556551	934	21	236.83	65.39
chr1	3558376	3559958	1583	32	320.02	83.22
chr1	3652961	3654064	1104	35	431.21	107
chr1	3678259	3679730	1472	33	358.39	65.39
chr1	3701840	3703503	1664	58	721.26	101.06
chr1	3762803	3764812	2010	125	1833.7	166.45
chr1	3805697	3808164	2468	92	1154.56	124.84
chr1	4262760	4263295	536	6	62.95	23.78
chr1	4614052	4616292	2241	48	500.97	59.45
chr1	4671832	4672339	508	9	104.21	35.67
chr1	5501047	5501488	442	6	68.51	29.72
chr1	5657940	5658458	519	6	63.88	29.72
chr1	5973683	5976391	2709	58	600.13	95.11
chr1	6008613	6011483	2871	144	1974.3	190.23
chr1	6161976	6163749	1774	53	626.14	83.22
chr1	6180559	6182520	1962	147	2269.23	255.62
chr1	6188504	6189111	608	7	71.32	23.78
chr1	6217570	6218936	1367	77	1108.19	154.56
chr1	6224590	6225642	1053	17	171.19	41.61
chr1	6231648	6232779	1132	33	395.96	71.34
chr1	6242551	6244471	1921	35	347.51	53.5
chr1	6375064	6376873	1810	54	637.14	89.17
chr1	6402240	6402796	557	10	114.1	47.56
chr1	6407239	6408119	881	18	198.64	65.39
chr1	6422921	6423609	689	11	117.55	35.67
chr1	6429665	6430166	502	7	77.64	29.72
chr1	6430205	6430769	565	6	61.44	29.72
chr1	6437469	6438079	611	11	123.55	41.61
chr1	6438182	6438688	507	8	90.57	29.72
chr1	6448378	6449059	682	9	91.99	35.67
chr1	6453273	6453816	544	6	62.53	23.78
chr1	6467807	6468897	1091	18	181.73	53.5
chr1	6472591	6473792	1202	20	200.27	41.61
chr1	6479579	6480698	1120	36	444.97	112.95
chr1	6536331	6537548	1218	66	942.97	154.56
chr1	6562258	6563437	1180	50	667.8	136.73
chr1	6582925	6586385	3461	175	2398.81	148.62
chr1	6595325	6598505	3181	122	1520.03	112.95
chr1	6607470	6608796	1327	53	675.78	101.06
chr1	6683068	6684800	1733	99	1422.32	184.28
chr1	6766404	6767673	1270	63	877.26	130.78
chr1	6767850	6769136	1287	45	566.17	77.28
chr1	6944488	6945061	574	6	60.99	29.72
chr1	6945395	6946331	937	13	127.07	47.56
chr1	6946367	6946792	426	7	83.1	35.67
chr1	7662320	7663793	1474	46	555.53	95.11
chr1	7686391	7688004	1614	47	552.99	71.34
chr1	7688009	7688546	538	16	205.91	77.28
chr1	7753351	7755030	1680	70	918.74	118.89
chr1	7765904	7767565	1662	34	355.12	65.39
chr1	7809375	7809968	594	6	60.01	29.72
chr1	7936269	7937585	1317	47	577.95	130.78
chr1	7943364	7945419	2056	104	1438.01	160.5
chr1	8007843	8008298	456	6	67.61	23.78
chr1	8008311	8009369	1059	24	268.19	47.56
chr1	8199579	8200531	953	18	192.41	53.5
chr1	8300487	8301387	901	14	142.31	41.61
chr1	8404953	8407231	2279	67	779.98	107
chr1	8507925	8508496	572	6	61.09	17.83
chr1	8685281	8686441	1161	31	361.61	83.22
chr1	8798585	8801577	2993	105	1286.41	118.89
chr1	8857325	8859657	2333	40	383.53	53.5
chr1	8859787	8862536	2750	155	2200.59	279.4
chr1	9110974	9112479	1506	46	551.26	77.28
chr1	9164121	9165905	1785	39	414.88	83.22
chr1	9216670	9218362	1693	66	848.86	118.89
chr1	9274926	9276890	1965	46	498.59	65.39
chr1	9411039	9411936	898	16	169.32	65.39
chr1	9521900	9523339	1440	68	930.1	130.78
chr1	9571067	9572912	1846	77	1008.16	95.11
chr1	9609467	9610322	856	14	132.29	47.56
chr1	9612248	9613615	1368	47	586.59	101.06
chr1	9633692	9635976	2285	82	1018.71	130.78
chr1	9671767	9672803	1037	23	255.81	59.45
chr1	9699980	9700730	751	9	88.04	35.67
chr1	9805514	9807347	1834	66	826.09	83.22
chr1	9833213	9833940	728	9	89.31	23.78
chr1	9891825	9893799	1975	74	935.75	112.95
chr1	9925109	9926633	1525	84	1198.1	166.45
chr1	9979567	9980844	1278	21	208.07	35.67
chr1	10014901	10016809	1909	102	1435.04	190.23
chr1	10192322	10194343	2022	71	879.1	112.95
chr1	10380813	10383029	2217	138	2021.72	202.12
chr1	10412798	10414289	1492	67	902.26	172.39
chr1	10454295	10455756	1462	58	753.69	130.78
chr1	10457463	10458715	1253	62	863.11	160.5
chr1	10620822	10622413	1592	33	347.24	65.39
chr1	10676213	10678248	2036	94	1265.56	124.84
chr1	10774787	10775166	380	7	85.2	41.61
chr1	10777360	10778151	792	11	110.64	29.72
chr1	10778484	10779416	933	18	194.09	53.5
chr1	10849493	10850306	814	20	234.47	77.28
chr1	10870959	10871954	996	16	148.93	35.67
chr1	10926778	10927259	482	8	92.47	41.61
chr1	10994379	10996614	2236	112	1541.6	202.12
chr1	11041348	11043804	2457	133	1869.46	148.62
chr1	11081425	11082846	1422	114	1800.4	243.73
chr1	11244227	11245266	1040	49	677.61	142.67
chr1	11245424	11245866	443	13	170.94	65.39
chr1	11255419	11257099	1681	132	2067.77	202.12
chr1	11461330	11462561	1232	19	185.05	47.56
chr1	11636694	11638130	1437	30	318.72	65.39
chr1	11646806	11647698	893	21	240.97	71.34
chr1	11662980	11664524	1545	68	909.39	118.89
chr1	11673483	11674975	1493	37	414.91	71.34
chr1	11718732	11719889	1158	30	331.76	77.28
chr1	11785684	11786267	584	8	85.3	23.78
chr1	11787279	11790489	3211	145	1922.38	160.5
chr1	11891112	11891925	814	11	109.29	29.72
chr1	11908228	11909338	1111	27	307	95.11
chr1	11916653	11918105	1453	37	419.25	89.17
chr1	11962449	11963805	1357	62	841.67	118.89
chr1	12001840	12003286	1447	44	527.56	77.28
chr1	12045732	12047123	1392	20	187.55	41.61
chr1	12149408	12150701	1294	33	376.79	71.34
chr1	12212399	12213881	1483	66	886.64	160.5
chr1	12369179	12369659	481	6	66.07	23.78
chr1	12599150	12600193	1044	15	145.82	35.67
chr1	12600231	12601367	1137	20	205.12	47.56
chr1	12601591	12602081	491	6	65.47	23.78
chr1	13712151	13713118	968	18	191.17	71.34
chr1	13898625	13900438	1814	92	1276.55	130.78
chr1	13947641	13949788	2148	87	1124.38	112.95
chr1	14091670	14092590	921	11	103.21	35.67
chr1	14797446	14798749	1304	18	167.75	35.67
chr1	15122795	15124396	1602	41	462.8	83.22
chr1	15170059	15170464	406	6	70.98	29.72
chr1	15351454	15353805	2352	49	505.11	59.45
chr1	15608257	15610858	2602	95	1182.82	107
chr1	15722683	15724969	2287	103	1372.92	172.39
chr1	15725760	15726834	1075	75	1149.88	184.28
chr1	15783348	15784416	1069	22	238.48	47.56
chr1	15802077	15803094	1018	41	543.42	148.62
chr1	15815886	15817957	2072	115	1632.97	172.39
chr1	15882796	15884469	1674	75	1005.85	136.73
chr1	15957436	15958395	960	13	125.67	29.72
chr1	16032805	16034911	2107	88	1148.61	112.95
chr1	16035132	16035641	510	13	162.6	71.34
chr1	16035908	16037040	1133	19	191.98	41.61
chr1	16046126	16049540	3415	190	2679.84	148.62
chr1	16174192	16175297	1106	42	545.26	118.89
chr1	16211821	16212350	530	7	75.84	29.72
chr1	16225841	16226213	373	6	71.42	35.67
chr1	16247625	16248158	534	8	88.63	29.72
chr1	16272166	16273032	867	30	384.73	83.22
chr1	16354623	16355418	796	11	110.39	35.67
chr1	16405221	16406829	1609	33	345.73	71.34
chr1	16415940	16416726	787	7	62.94	29.72
chr1	16435321	16436655	1335	42	510.93	89.17
chr1	16550192	16552203	2012	87	1148.89	142.67
chr1	16565935	16567719	1785	92	1282.95	172.39
chr1	16639433	16640675	1243	79	1177.58	184.28
chr1	16651284	16651881	598	9	97.42	47.56
chr1	16697815	16699081	1267	46	585.67	118.89
chr1	16713377	16713961	585	6	60.45	29.72
chr1	16811718	16813307	1590	94	1365.96	279.4
chr1	16842711	16844095	1385	118	1893.59	255.62
chr1	16891342	16891750	409	6	70.77	29.72
chr1	16899480	16899977	498	6	65.07	29.72
chr1	16899985	16900662	678	11	118.36	41.61
chr1	16906928	16907497	570	9	99.41	35.67
chr1	17087790	17088846	1057	26	297.88	83.22
chr1	17094351	17094749	399	8	99.49	47.56
chr1	17103465	17104222	758	11	112.81	53.5
chr1	17112712	17113862	1151	32	362.78	83.22
chr1	17159961	17160558	598	13	153.22	47.56
chr1	17179344	17180054	711	14	157.09	53.5
chr1	17209757	17211276	1520	55	694.23	89.17
chr1	17252133	17253440	1308	54	712.93	166.45
chr1	17318206	17319131	926	17	180.8	53.5
chr1	17635867	17639338	3472	181	2503.74	142.67
chr1	17738244	17739632	1389	26	267.02	47.56
chr1	18306886	18307460	575	7	73.16	35.67
chr1	18839804	18840370	567	6	61.34	23.78
chr1	18845280	18845690	411	6	70.63	29.72
chr1	18845784	18846462	679	15	174.46	53.5
chr1	18915768	18916292	525	6	63.55	23.78
chr1	19100768	19101774	1007	36	461.65	107
chr1	19101933	19102489	557	13	157.4	65.39
chr1	19154256	19156406	2151	87	1123.86	118.89
chr1	19408090	19410581	2492	163	2417.13	202.12
chr1	19449702	19451804	2103	175	2774.67	243.73
chr1	19473121	19473760	640	8	81.9	23.78
chr1	19487922	19488501	580	6	60.69	17.83
chr1	19510456	19512172	1717	61	762.19	118.89
chr1	19683164	19685705	2542	78	917.97	83.22
chr1	19795314	19797094	1781	81	1089.28	118.89
chr1	19842678	19844867	2190	88	1133.98	101.06
chr1	19863628	19864479	852	17	187.06	35.67
chr1	19864584	19865495	912	13	128.63	35.67
chr1	19956053	19956429	377	6	71.42	35.67
chr1	19998266	19999599	1334	39	463.87	95.11
chr1	20081280	20082448	1169	53	721.79	112.95
chr1	20384896	20385652	757	14	153.16	53.5
chr1	20565518	20566133	616	8	83.32	23.78
chr1	20683044	20683515	472	7	79.68	23.78
chr1	20683969	20685696	1728	48	554.45	83.22
chr1	20706277	20707797	1521	95	1402.76	190.23
chr1	20752209	20753333	1125	33	396.85	89.17
chr1	20787954	20788813	860	9	82.51	23.78
chr1	20832318	20833602	1285	44	550.18	77.28
chr1	20859519	20861389	1871	131	1987.33	172.39
chr1	20895427	20896367	941	12	114.33	29.72
chr1	20916290	20917319	1030	25	285.88	65.39
chr1	20929095	20929595	501	6	64.89	29.72
chr1	20930302	20932248	1947	41	428.45	53.5
chr1	20984349	20987358	3010	178	2559.3	196.17
chr1	21374459	21376496	2038	62	732.85	95.11
chr1	21488784	21489732	949	25	294.84	71.34
chr1	21543697	21545817	2121	42	427.28	47.56
chr1	21627211	21627714	504	6	64.72	29.72
chr1	21638867	21639822	956	32	387.89	101.06
chr1	21708098	21708611	514	10	117.79	53.5
chr1	21820938	21822010	1073	23	252.38	59.45
chr1	21850347	21851459	1113	32	382.79	89.17
chr1	21867516	21869447	1932	36	360.24	65.39
chr1	21980834	21982994	2161	150	2265.35	202.12
chr1	21983792	21984168	377	6	71.42	35.67
chr1	22013395	22014009	615	18	227.38	59.45
chr1	22135362	22136948	1587	50	603.62	83.22
chr1	22223695	22225528	1834	94	1307.94	249.67
chr1	22251337	22253242	1906	65	798.94	89.17
chr1	22341319	22342799	1481	57	733.7	130.78
chr1	22650642	22652171	1530	88	1270.21	196.17
chr1	22762188	22763238	1051	25	283.67	77.28
chr1	22909352	22911102	1751	65	822.69	107
chr1	23152133	23153006	874	13	131.09	41.61
chr1	23217686	23220017	2332	143	2084.59	172.39
chr1	23366431	23368244	1814	67	845.7	124.84
chr1	23376511	23377409	899	12	116.77	41.61
chr1	23415783	23416888	1106	34	415.06	89.17
chr1	23417286	23417495	210	7	177	41.61
chr1	23540850	23544104	3255	146	1931.21	184.28
chr1	23563491	23564046	556	6	61.9	23.78
chr1	23566765	23569196	2432	126	1748.87	136.73
chr1	23622821	23623914	1094	21	222.28	53.5
chr1	23682593	23684186	1594	29	291.67	53.5
chr1	23729108	23730457	1350	42	508.9	89.17
chr1	23753496	23754475	980	14	137.1	47.56
chr1	23757655	23758838	1184	19	188.34	53.5
chr1	23766990	23767643	654	16	191.89	65.39
chr1	23890670	23892573	1904	119	1749.73	178.34
chr1	23941858	23943797	1940	95	1302.83	118.89
chr1	23976651	23978290	1640	118	1787.81	214.01
chr1	23989898	23991419	1522	42	487.12	65.39
chr1	23998481	24000684	2204	79	982.05	107
chr1	24023452	24024880	1429	78	1111.57	231.84
chr1	24066403	24067773	1371	37	428.55	83.22
chr1	24101544	24102394	851	11	107.09	41.61
chr1	24157902	24160427	2526	126	1728.3	196.17
chr1	24177749	24179794	2046	110	1548.18	208.06
chr1	24307470	24308007	538	6	62.84	29.72
chr1	24385970	24387060	1091	28	324.14	101.06
chr1	24520778	24522044	1267	20	195.7	47.56
chr1	24612008	24613229	1222	62	869.86	196.17
chr1	24614283	24615921	1639	62	791.03	142.67
chr1	24701095	24702977	1883	61	737.93	95.11
chr1	24754570	24755544	975	12	112.44	35.67
chr1	24840704	24841266	563	8	86.66	29.72
chr1	24841396	24843679	2284	134	1929.8	214.01
chr1	24943789	24945901	2113	92	1216	160.5
chr1	25047202	25047950	749	13	140.05	41.61
chr1	25069782	25070121	340	7	99.49	41.61
chr1	25127069	25127532	464	9	108	41.61
chr1	25127596	25130103	2508	114	1520.94	112.95
chr1	25131219	25131794	576	8	85.81	41.61
chr1	25430592	25432634	2043	103	1423	225.89
chr1	25438639	25439670	1032	20	213.59	47.56
chr1	25445030	25447668	2639	138	1918.06	178.34
chr1	25535709	25536566	858	16	172.55	47.56
chr1	25537132	25538488	1357	64	876.72	124.84
chr1	25628651	25631076	2426	145	2097.28	202.12
chr1	25742461	25743618	1158	42	536.87	101.06
chr1	25815169	25817311	2143	53	583.15	65.39
chr1	25998927	26000193	1267	43	536.62	83.22
chr1	26018483	26020527	2045	99	1351.55	112.95
chr1	26057554	26059409	1856	43	465.77	65.39
chr1	26073766	26075413	1648	48	564.25	77.28
chr1	26103609	26106364	2756	91	1094.99	124.84
chr1	26121435	26122646	1212	24	254.07	53.5
chr1	26196389	26197256	868	28	352.15	101.06
chr1	26234063	26235248	1186	46	598.87	101.06
chr1	26244827	26245798	972	11	100.57	35.67
chr1	26309523	26311868	2346	153	2268.84	202.12
chr1	26360320	26361526	1207	19	186.74	41.61
chr1	26363100	26363698	599	10	110.76	41.61
chr1	26368635	26369794	1160	62	883.88	172.39
chr1	26423837	26424958	1122	21	219.96	53.5
chr1	26432883	26434655	1773	108	1578.84	178.34
chr1	26478373	26480582	2210	63	726.67	112.95
chr1	26505108	26506101	994	55	795.63	202.12
chr1	26516802	26518040	1239	34	398.27	89.17
chr1	26534811	26536069	1259	31	350.7	95.11
chr1	26559043	26559784	742	11	113.87	35.67
chr1	26630595	26632182	1588	59	732.96	172.39
chr1	26670888	26673273	2386	83	1019.7	130.78
chr1	26699130	26700937	1808	63	781.03	95.11
chr1	26728400	26729803	1404	61	815.25	130.78
chr1	26744587	26745792	1206	30	341.5	101.06
chr1	26819108	26820997	1890	71	899.74	118.89
chr1	26891341	26892535	1195	41	498.6	112.95
chr1	26894118	26897771	3654	146	1858.83	107
chr1	26986254	26988402	2149	96	1278.23	166.45
chr1	27025203	27027133	1931	58	684.08	118.89
chr1	27063307	27064880	1574	53	637.37	118.89
chr1	27088555	27089720	1166	79	1199.52	172.39
chr1	27098629	27100212	1584	117	1805.41	196.17
chr1	27120044	27122067	2024	101	1391.47	196.17
chr1	27158985	27159565	581	6	60.64	23.78
chr1	27192273	27193810	1538	42	485.22	101.06
chr1	27211573	27212398	826	12	121.3	35.67
chr1	27353460	27354743	1284	50	649.47	142.67
chr1	27433019	27434983	1965	48	527.95	83.22
chr1	27520903	27522736	1834	107	1544.55	255.62
chr1	27540722	27542973	2252	74	894	118.89
chr1	27548368	27549457	1090	18	181.8	35.67
chr1	27559308	27559819	512	6	64.27	17.83
chr1	27564624	27566289	1666	45	515.96	71.34
chr1	27591318	27592306	989	32	399.28	101.06
chr1	27687764	27689953	2190	90	1167.81	154.56
chr1	27726693	27727588	896	19	211.54	59.45
chr1	27749905	27750356	452	6	67.87	29.72
chr1	27750727	27751307	581	6	60.64	23.78
chr1	27767385	27768335	951	14	138.96	47.56
chr1	27774394	27775556	1163	22	230.39	53.5
chr1	27800770	27801361	592	8	84.79	23.78
chr1	27801366	27803648	2283	71	842.08	71.34
chr1	27833087	27834442	1356	26	269.72	59.45
chr1	27858512	27859093	582	7	72.76	23.78
chr1	27859099	27859627	529	9	102.52	29.72
chr1	27870826	27871898	1073	32	387.89	83.22
chr1	27924858	27926025	1168	73	1085.11	172.39
chr1	27971407	27973159	1753	83	1129.88	172.39
chr1	28029442	28031301	1860	111	1612	214.01
chr1	28071327	28072747	1421	29	292.02	59.45
chr1	28112925	28113794	870	55	827.6	154.56
chr1	28133760	28134777	1018	22	243.19	53.5
chr1	28158370	28159920	1551	69	925.55	124.84
chr1	28286405	28288197	1793	121	1818.76	273.45
chr1	28431206	28432471	1266	76	1115.18	219.95
chr1	28434651	28436476	1826	88	1202.92	196.17
chr1	28445435	28446223	789	23	283.43	65.39
chr1	28458136	28460167	2032	73	910.27	107
chr1	28527655	28529068	1414	56	728.23	154.56
chr1	28568368	28569863	1496	102	1523.47	172.39
chr1	28637058	28638621	1564	29	294.04	47.56
chr1	28704104	28709557	5454	340	3100	214.01
chr1	28717044	28718415	1372	65	891.24	112.95
chr1	28729453	28730018	566	6	61.39	29.72
chr1	28751450	28753210	1761	79	1058.41	160.5
chr1	28778505	28779215	711	10	102.95	23.78
chr1	28779353	28782031	2679	230	3100	249.67
chr1	28791023	28792067	1045	27	314.22	89.17
chr1	28841147	28843376	2230	122	1722.95	166.45
chr1	28867192	28869230	2039	120	1733.01	178.34
chr1	28935235	28937487	2253	132	1900.67	190.23
chr1	28974102	28974680	579	6	60.74	17.83
chr1	29010910	29011755	846	9	83.18	35.67
chr1	29085847	29087532	1686	61	766.98	124.84
chr1	29113244	29114684	1441	46	544.14	89.17
chr1	29320163	29322380	2218	33	300.49	41.61
chr1	29322835	29324347	1513	31	312.05	65.39
chr1	29379115	29381636	2522	130	1800.59	160.5
chr1	29429123	29430606	1484	55	699.93	172.39
chr1	29435228	29435951	724	25	324.61	107
chr1	29436197	29437704	1508	46	550.99	95.11
chr1	29458740	29459386	647	11	120.69	35.67
chr1	30331379	30331829	451	6	67.93	29.72
chr1	30963576	30964952	1377	40	474	71.34
chr1	31001249	31002067	819	12	121.76	29.72
chr1	31002207	31003716	1510	85	1220.01	196.17
chr1	31052643	31053028	386	9	114.23	53.5
chr1	31153440	31154437	998	45	615.94	107
chr1	31197943	31198314	372	7	85.2	41.61
chr1	31309188	31311902	2715	125	1671.73	166.45
chr1	31399977	31401331	1355	48	604.87	101.06
chr1	31484523	31485461	939	18	193.58	53.5
chr1	31541154	31543367	2214	172	2676.57	231.84
chr1	31618508	31619099	592	8	84.79	35.67
chr1	31639906	31640606	701	10	103.59	35.67
chr1	31658477	31659898	1422	33	363.31	65.39
chr1	31826972	31827545	574	10	112.72	35.67
chr1	31855542	31856137	596	6	59.92	29.72
chr1	31856314	31856769	456	6	67.61	29.72
chr1	31882045	31884035	1991	119	1726.76	202.12
chr1	31953269	31953798	530	6	63.27	23.78
chr1	31998785	31999408	624	10	108.89	35.67
chr1	32001647	32002934	1288	30	332.93	65.39
chr1	32010181	32011297	1117	15	141.38	35.67
chr1	32026210	32027642	1433	32	333.32	89.17
chr1	32174815	32177076	2262	76	924.68	107
chr1	32251748	32253769	2022	133	1981.28	184.28
chr1	32310361	32311962	1602	51	617.46	178.34
chr1	32345614	32347424	1811	140	2181.65	243.73
chr1	32417409	32419353	1945	80	1041.5	148.62
chr1	32438724	32439812	1089	24	265.26	53.5
chr1	32443542	32444767	1226	45	575.65	148.62
chr1	32459784	32461443	1660	101	1477.98	279.4
chr1	32478232	32479260	1029	25	285.99	89.17
chr1	32479301	32479905	605	13	152.54	41.61
chr1	32529469	32531193	1725	75	996.13	166.45
chr1	32573129	32574488	1360	42	507.56	83.22
chr1	32574543	32574969	427	7	83.02	35.67
chr1	32589253	32590439	1187	30	343.57	83.22
chr1	32599620	32600562	943	17	179.44	41.61
chr1	32631862	32633486	1625	98	1431.23	184.28
chr1	32702987	32703519	533	6	63.11	17.83
chr1	32738294	32739680	1387	48	600.01	95.11
chr1	32777007	32779052	2046	111	1566.32	172.39
chr1	32850049	32851065	1017	27	317.42	95.11
chr1	32887995	32890636	2642	143	2007.66	208.06
chr1	32940399	32941758	1360	18	164.47	29.72
chr1	32950393	32950776	384	6	71.42	35.67
chr1	32979256	32980896	1641	68	891.67	130.78
chr1	32991796	32992907	1112	19	193.54	41.61
chr1	33054265	33057002	2738	211	3100	237.78
chr1	33108405	33109694	1290	44	549.44	95.11
chr1	33124435	33125166	732	11	114.54	29.72
chr1	33130904	33131757	854	10	94.67	29.72
chr1	33138955	33139944	990	31	383.15	101.06
chr1	33201615	33203621	2007	61	721.21	107
chr1	33210921	33211680	760	19	225.37	59.45
chr1	33274136	33275525	1390	61	817.9	118.89
chr1	33319105	33319730	626	11	122.34	41.61
chr1	33364744	33365510	767	59	936.17	208.06
chr1	33365692	33366460	769	21	254.82	89.17
chr1	33418768	33420589	1822	38	397.28	65.39
chr1	33493740	33496373	2634	87	1048.19	118.89
chr1	33544966	33545370	405	6	71.05	29.72
chr1	33586584	33588907	2324	89	1128.14	107
chr1	33668236	33669443	1208	45	578.54	107
chr1	33710363	33711600	1238	27	294.29	83.22
chr1	34401213	34402399	1187	18	175.1	41.61
chr1	34402861	34403379	519	8	89.7	41.61
chr1	34415199	34415686	488	6	65.65	23.78
chr1	35019304	35020025	722	12	128.55	41.61
chr1	35096865	35098296	1432	100	1523.32	231.84
chr1	35103741	35105137	1397	33	365.84	65.39
chr1	35123461	35124557	1097	18	181.29	53.5
chr1	35167021	35168780	1760	51	596.79	83.22
chr1	35222694	35224115	1422	100	1526.36	184.28
chr1	35268585	35270286	1702	143	2279.26	219.95
chr1	35317080	35318432	1353	71	1002.32	184.28
chr1	35358690	35359335	646	8	81.56	35.67
chr1	35428655	35431568	2914	217	3100	202.12
chr1	35506509	35508432	1924	65	796.31	130.78
chr1	35794717	35797267	2551	116	1547.3	166.45
chr1	35811254	35812577	1324	27	286.42	65.39
chr1	35814783	35815154	372	6	71.42	35.67
chr1	35815218	35816638	1421	24	237.53	47.56
chr1	35878499	35880334	1836	91	1253.96	208.06
chr1	35880462	35880839	378	7	85.2	41.61
chr1	35945583	35946792	1210	25	268.33	65.39
chr1	35955698	35957678	1981	85	1120.31	136.73
chr1	36007033	36008693	1661	64	820.75	124.84
chr1	36045666	36047589	1924	86	1148.31	130.78
chr1	36121375	36122529	1155	68	995.17	148.62
chr1	36168115	36170499	2385	143	2070.73	154.56
chr1	36321961	36322814	854	29	370.36	101.06
chr1	36326732	36328322	1591	88	1255.32	166.45
chr1	36336883	36337605	723	13	128.47	41.61
chr1	36338083	36338375	293	6	99.49	35.67
chr1	36362775	36363812	1038	31	376.74	112.95
chr1	36386905	36387927	1023	59	862.04	160.5
chr1	36393453	36396199	2747	110	1408.69	154.56
chr1	36399199	36399781	583	7	72.7	23.78
chr1	36414454	36414821	368	8	99.49	47.56
chr1	36461479	36463984	2506	166	2470.08	237.78
chr1	36544367	36545803	1437	36	406.04	77.28
chr1	36558737	36559881	1145	21	204.5	41.61
chr1	36560953	36562347	1395	38	440.99	65.39
chr1	36622858	36625006	2149	73	892.7	118.89
chr1	36635197	36636277	1081	93	1503.12	267.51
chr1	36688256	36689175	920	22	252.96	65.39
chr1	36701488	36703207	1720	79	1066.45	184.28
chr1	36720126	36721166	1041	18	185.42	41.61
chr1	37272187	37272985	799	22	266.62	95.11
chr1	37711583	37714570	2988	101	1206.32	124.84
chr1	37717394	37718128	735	8	65.14	29.72
chr1	37751869	37753476	1608	72	966.57	154.56
chr1	37791348	37792863	1516	71	967.34	148.62
chr1	37832954	37834620	1667	91	1291.93	184.28
chr1	37927725	37929174	1450	51	639.43	172.39
chr1	37929388	37931688	2301	98	1284.12	208.06
chr1	37990888	37991689	802	15	163.32	41.61
chr1	37992011	37992605	595	6	59.96	17.83
chr1	38031527	38033267	1741	50	583.66	83.22
chr1	38045150	38047460	2311	119	1650.25	184.28
chr1	38096622	38098818	2197	97	1286.34	112.95
chr1	38169317	38170577	1261	47	603.18	118.89
chr1	38184390	38185666	1277	37	439.93	118.89
chr1	38226774	38228723	1950	105	1479.87	196.17
chr1	38234053	38234602	550	7	74.62	29.72
chr1	38242136	38244164	2029	78	993.45	148.62
chr1	38250854	38252047	1194	90	1384.37	261.56
chr1	38283157	38285942	2786	68	737.18	77.28
chr1	38714667	38715220	554	6	62	23.78
chr1	38797712	38798417	706	9	90.57	29.72
chr1	38816523	38817278	756	10	100.17	35.67
chr1	39042223	39042983	761	10	99.87	29.72
chr1	39056133	39056843	711	8	78.02	23.78
chr1	39097113	39098959	1847	92	1269.38	136.73
chr1	39110684	39112464	1781	84	1141.74	154.56
chr1	39229021	39231023	2003	95	1289.74	148.62
chr1	39264160	39265751	1592	116	1783.41	303.17
chr1	39319194	39320654	1461	29	302.55	71.34
chr1	39343127	39344943	1817	58	699.27	77.28
chr1	39442656	39445391	2736	94	1146.16	118.89
chr1	39453425	39454052	628	8	82.6	23.78
chr1	39454099	39455350	1252	23	236.93	41.61
chr1	39646376	39648278	1903	61	735.16	101.06
chr1	39729400	39730434	1035	33	408.85	89.17
chr1	39797257	39797963	707	38	553.65	118.89
chr1	39812509	39815429	2921	105	1297.36	124.84
chr1	39871025	39871778	754	10	100.29	41.61
chr1	39877385	39878481	1097	29	338.6	65.39
chr1	39909686	39910678	993	17	175.57	47.56
chr1	39929476	39930068	593	10	111.22	47.56
chr1	39976912	39977965	1054	68	1022.22	237.78
chr1	40026673	40028027	1355	28	297.78	71.34
chr1	40120830	40121884	1055	87	1392.17	279.4
chr1	40139207	40141057	1851	62	758.51	148.62
chr1	40192961	40194600	1640	44	503.78	89.17
chr1	40277681	40280253	2573	152	2189.37	208.06
chr1	40334862	40336041	1180	44	566.47	107
chr1	40399232	40401359	2128	115	1619.74	202.12
chr1	40495109	40497116	2008	175	2809.66	214.01
chr1	40553706	40554382	677	16	189.42	71.34
chr1	40554486	40555471	986	16	162.72	41.61
chr1	40611543	40613420	1878	111	1607.39	166.45
chr1	40687767	40689114	1348	47	589.58	89.17
chr1	40714955	40716499	1545	65	857.83	107
chr1	40730571	40731079	509	6	64.44	29.72
chr1	40732924	40733494	571	6	61.14	17.83
chr1	40746119	40748087	1969	103	1439.39	160.5
chr1	40769085	40770712	1628	91	1301.25	148.62
chr1	40903361	40904328	968	16	164.02	41.61
chr1	40929221	40931206	1986	97	1328.55	130.78
chr1	40947195	40948029	835	11	108.03	35.67
chr1	41021372	41022919	1548	44	514.73	107
chr1	41040323	41041019	697	9	91.1	35.67
chr1	41056464	41057179	716	11	115.64	35.67
chr1	41099150	41100587	1438	46	560.44	89.17
chr1	41100767	41101384	618	12	122.98	65.39
chr1	41217243	41219297	2055	108	1509.98	160.5
chr1	41479117	41481300	2184	102	1375.84	112.95
chr1	41599063	41600515	1453	31	331.47	59.45
chr1	41604392	41605570	1179	18	175.63	41.61
chr1	41619844	41621107	1264	27	291.85	53.5
chr1	41734029	41734888	860	16	172.39	47.56
chr1	41754439	41755189	751	16	182.02	53.5
chr1	41899732	41901448	1717	51	602.22	77.28
chr1	42129466	42130284	819	13	134.85	35.67
chr1	42155584	42157231	1648	57	707.38	130.78
chr1	42158010	42158448	439	6	68.71	29.72
chr1	42273049	42274915	1867	72	920.16	112.95
chr1	42572105	42574485	2381	151	2202.57	178.34
chr1	42618378	42619892	1515	53	662.23	148.62
chr1	42693795	42695503	1709	116	1747.8	172.39
chr1	42700927	42702091	1165	42	535.76	142.67
chr1	42767861	42768295	435	8	96.33	35.67
chr1	42896101	42898063	1963	109	1549.57	184.28
chr1	42919234	42922957	3724	173	2308.81	154.56
chr1	43003700	43006492	2793	177	2597.86	243.73
chr1	43054805	43056011	1207	51	679.98	142.67
chr1	43083785	43085975	2191	102	1374.43	148.62
chr1	43161878	43163564	1687	51	606.09	101.06
chr1	43195842	43197862	2021	81	1045.12	124.84
chr1	43306221	43307230	1010	15	148.01	41.61
chr1	43386003	43386390	388	6	71.42	35.67
chr1	43409391	43411101	1711	97	1390.99	208.06
chr1	43508636	43509423	788	17	192.94	71.34
chr1	43538945	43539682	738	7	65.01	29.72
chr1	43543181	43543570	390	8	99.49	47.56
chr1	43575943	43576704	762	11	112.55	35.67
chr1	43586740	43587859	1120	16	153.78	35.67
chr1	43596056	43597970	1915	66	813.81	124.84
chr1	43605059	43607196	2138	121	1726.77	154.56
chr1	43627089	43629059	1971	135	2034.21	208.06
chr1	43691442	43692943	1502	36	399.17	77.28
chr1	43768872	43770316	1445	41	481.05	59.45
chr1	43803632	43804542	911	17	182.03	53.5
chr1	43887643	43889718	2076	123	1779.13	160.5
chr1	43944764	43947115	2352	144	2097.98	166.45
chr1	44174179	44175259	1081	27	310.22	59.45
chr1	44183747	44185865	2119	107	1477.83	172.39
chr1	44207845	44209115	1271	61	841.57	202.12
chr1	44212426	44214468	2043	85	1109.02	124.84
chr1	44216900	44218610	1711	46	525.94	71.34
chr1	44229504	44230548	1045	22	240.67	65.39
chr1	44267628	44269957	2330	88	1110.53	107
chr1	44451150	44452478	1329	62	847.28	208.06
chr1	44592544	44593881	1338	52	657.18	154.56
chr1	44643145	44648468	5324	262	3100	178.34
chr1	44655539	44656740	1202	21	200.27	41.61
chr1	44855166	44855717	552	8	87.4	35.67
chr1	44869735	44871291	1557	58	721.36	95.11
chr1	44912002	44913266	1265	52	686.57	202.12
chr1	44977407	44979013	1607	85	1197.1	190.23
chr1	45013062	45015343	2282	164	2498.41	178.34
chr1	45022142	45022720	579	6	60.74	17.83
chr1	45024370	45025136	767	9	87.17	35.67
chr1	45037872	45039429	1558	50	607.61	107
chr1	45051772	45052459	688	11	117.63	41.61
chr1	45058232	45059282	1051	29	344.02	112.95
chr1	45081029	45081922	894	16	169.64	47.56
chr1	45223646	45225259	1614	74	1000.2	178.34
chr1	45248385	45250029	1645	69	908	148.62
chr1	45250068	45251850	1783	54	640.63	89.17
chr1	45443791	45445470	1680	77	1039.48	130.78
chr1	45541531	45542958	1428	68	932.57	160.5
chr1	45564603	45566649	2047	69	842.98	107
chr1	45577239	45579846	2608	135	1871.12	178.34
chr1	45580144	45580719	576	6	60.89	29.72
chr1	45728363	45730051	1689	83	1143.22	148.62
chr1	45737652	45739347	1696	67	865.14	142.67
chr1	45758348	45758858	511	9	103.96	29.72
chr1	45758998	45760918	1921	119	1745.16	243.73
chr1	45788737	45790195	1459	114	1787.71	190.23
chr1	45821708	45824104	2397	150	2198.24	255.62
chr1	45923371	45927310	3940	252	3100	279.4
chr1	45988288	45988951	664	9	93.1	35.67
chr1	45989048	45989573	526	13	160.78	65.39
chr1	46041816	46043089	1274	27	290.93	59.45
chr1	46370214	46371221	1008	18	187.97	65.39
chr1	46371387	46372179	793	19	221.79	77.28
chr1	46404769	46405698	930	31	391.63	89.17
chr1	46435964	46437192	1229	69	995.13	154.56
chr1	46441094	46442683	1590	72	970.07	166.45
chr1	46484829	46485782	954	36	470.15	101.06
chr1	46485894	46487184	1291	51	665.09	166.45
chr1	46539521	46543034	3514	226	3100	219.95
chr1	46578485	46579881	1397	85	1248.65	219.95
chr1	46631986	46633204	1219	33	385.34	83.22
chr1	46681032	46681592	561	8	73.97	35.67
chr1	46686096	46686857	762	13	139.05	41.61
chr1	46704569	46705521	953	31	388.32	77.28
chr1	46723621	46724441	821	28	359	107
chr1	46727458	46728431	974	12	112.5	23.78
chr1	46771043	46771929	887	16	170.2	71.34
chr1	46841832	46843139	1308	53	695.94	190.23
chr1	46854275	46855499	1225	46	592.41	95.11
chr1	46905604	46907184	1581	79	1095.23	148.62
chr1	46956510	46958133	1624	81	1121.58	142.67
chr1	47261660	47262325	666	9	92.97	29.72
chr1	47462828	47464576	1749	48	551.96	77.28
chr1	47466758	47470851	4094	187	2479.63	243.73
chr1	47473480	47474030	551	6	62.16	29.72
chr1	47551225	47552969	1745	73	958.17	148.62
chr1	47571542	47573531	1990	122	1782.9	184.28
chr1	47654275	47655592	1318	23	231.8	47.56
chr1	47670554	47671277	724	12	128.4	41.61
chr1	47674882	47677880	2999	88	1015.39	95.11
chr1	47746071	47747089	1019	33	411.09	77.28
chr1	47771388	47772048	661	9	93.28	29.72
chr1	47963230	47963819	590	15	183.92	53.5
chr1	48222334	48222817	484	6	65.89	29.72
chr1	48234557	48236233	1677	42	469.56	83.22
chr1	48709628	48711102	1475	53	668.36	118.89
chr1	49014229	49016010	1782	68	867.48	112.95
chr1	50261995	50262821	827	18	203.67	53.5
chr1	50286181	50286786	606	8	83.93	29.72
chr1	50347938	50348447	510	6	64.38	23.78
chr1	50571436	50571969	534	8	88.63	23.78
chr1	50656888	50657835	948	18	192.82	47.56
chr1	51197426	51199113	1688	96	1378.28	184.28
chr1	51206143	51209482	3340	161	2176.3	142.67
chr1	51215023	51216965	1943	54	620.68	65.39
chr1	51473838	51476126	2289	126	1781.78	160.5
chr1	51568252	51569213	962	21	234.1	53.5
chr1	51582936	51583734	799	10	97.67	23.78
chr1	51755765	51757786	2022	106	1481.43	142.67
chr1	51854878	51856259	1382	79	1141.25	208.06
chr1	51967215	51968932	1718	66	844.69	130.78
chr1	52115445	52118140	2696	158	2269.13	208.06
chr1	52228229	52229215	987	19	203.46	59.45
chr1	52270584	52272168	1585	113	1708.11	202.12
chr1	52292454	52295812	3359	264	3100	315.06
chr1	52379990	52381485	1496	65	866.89	166.45
chr1	52603583	52605148	1566	63	820.1	124.84
chr1	52606609	52607215	607	18	228.43	65.39
chr1	52641390	52644123	2734	187	2804.35	243.73
chr1	52789978	52792583	2606	132	1817.88	148.62
chr1	52840197	52841809	1613	43	491.71	71.34
chr1	52871050	52872010	961	21	234.2	47.56
chr1	52935953	52937088	1136	47	624.49	154.56
chr1	52941322	52941968	647	16	192.66	71.34
chr1	52964332	52965808	1477	63	836.04	118.89
chr1	53080921	53081943	1023	16	160.13	35.67
chr1	53159385	53160296	912	19	210.06	71.34
chr1	53165082	53166513	1432	38	436.69	77.28
chr1	53252632	53254153	1522	52	644.92	130.78
chr1	53299966	53301127	1162	15	138.79	35.67
chr1	53434653	53436198	1546	79	1102.88	178.34
chr1	53457962	53459433	1472	80	1137.81	166.45
chr1	53475812	53477576	1765	98	1396.21	214.01
chr1	53514882	53515419	538	6	62.84	23.78
chr1	53563842	53567015	3174	145	1929.59	148.62
chr1	53697737	53698392	656	9	93.6	41.61
chr1	53975900	53977904	2005	40	409.34	47.56
chr1	54075270	54077183	1914	97	1344.01	154.56
chr1	54127420	54128757	1338	62	845.46	196.17
chr1	54183038	54185629	2592	82	974.37	118.89
chr1	54220614	54220931	318	6	85.2	35.67
chr1	54290090	54292983	2894	197	2948.52	303.17
chr1	54359989	54360393	405	7	71.05	35.67
chr1	54437591	54439417	1827	135	2078.5	279.4
chr1	54643186	54646086	2901	88	1027.87	71.34
chr1	54712871	54713575	705	8	78.34	23.78
chr1	54726217	54727252	1036	18	185.8	47.56
chr1	54727354	54727906	553	12	143.03	41.61
chr1	54737205	54738649	1445	24	235.8	41.61
chr1	54780039	54781155	1117	25	277.03	53.5
chr1	54953697	54955232	1536	97	1436.28	225.89
chr1	55001802	55003003	1202	59	820.67	160.5
chr1	55003064	55003393	330	7	99.49	41.61
chr1	55039020	55039929	910	20	224.64	53.5
chr1	55123797	55126300	2504	107	1400.92	208.06
chr1	55218613	55219301	689	8	79.18	29.72
chr1	55235140	55235680	541	6	62.68	29.72
chr1	55277594	55278360	767	9	87.17	23.78
chr1	55294467	55294799	333	6	85.2	35.67
chr1	55451745	55454361	2617	161	2345.3	190.23
chr1	56715594	56716364	771	16	180.14	47.56
chr1	56816188	56818201	2014	73	913.06	107
chr1	56882961	56884400	1440	26	249.48	47.56
chr1	57659844	57661190	1347	18	165.22	35.67
chr1	57661995	57663217	1223	27	295.72	71.34
chr1	58487991	58488792	802	10	97.5	23.78
chr1	58783875	58785422	1548	70	943.49	148.62
chr1	58814524	58816124	1601	37	403.77	65.39
chr1	58937326	58938712	1387	71	994.68	202.12
chr1	59019782	59021173	1392	23	226.37	35.67
chr1	59021185	59023560	2376	65	737.45	89.17
chr1	59053488	59053970	483	8	92.39	23.78
chr1	59054336	59054939	604	9	97.01	41.61
chr1	59141597	59142611	1015	27	317.65	77.28
chr1	59384734	59385549	816	13	135.07	35.67
chr1	59534317	59535805	1489	51	633.58	118.89
chr1	60052425	60053983	1559	36	393.38	89.17
chr1	60164361	60165459	1099	44	580.07	130.78
chr1	61281432	61282073	642	14	163.5	47.56
chr1	61288036	61289771	1736	46	523.07	77.28
chr1	61291816	61292502	687	22	281.31	83.22
chr1	61294785	61296019	1235	28	309.03	95.11
chr1	61315027	61316344	1318	49	627.17	107
chr1	61319782	61322371	2590	124	1679.45	142.67
chr1	61962422	61964232	1811	126	1909.24	261.56
chr1	61979958	61981768	1811	99	1403.48	118.89
chr1	62057675	62058070	396	6	71.42	35.67
chr1	62433018	62433888	871	10	93.79	23.78
chr1	62556686	62557931	1246	22	223.8	53.5
chr1	62673735	62674717	983	61	909.72	202.12
chr1	62674835	62677386	2552	142	2010.75	154.56
chr1	62925568	62927425	1858	94	1302.66	107
chr1	63021744	63023415	1672	123	1874.76	255.62
chr1	63312056	63312959	904	14	142.1	35.67
chr1	63555048	63556154	1107	15	141.97	41.61
chr1	63560635	63562902	2268	33	297.38	47.56
chr1	63605466	63606733	1268	88	1341.87	219.95
chr1	63760432	63762695	2264	150	2235.19	237.78
chr1	63830835	63832875	2041	110	1549.34	154.56
chr1	64012247	64013717	1471	41	477.89	71.34
chr1	64707865	64710089	2225	73	881.8	77.28
chr1	64743321	64744767	1447	40	465.42	101.06
chr1	64982523	64984660	2138	94	1245.76	118.89
chr1	65203214	65205520	2307	143	2091.24	190.23
chr1	65240509	65241656	1148	44	571.72	83.22
chr1	65304316	65307655	3340	192	2734.71	160.5
chr1	65385345	65387756	2412	64	718.14	77.28
chr1	65492315	65494220	1906	88	1186.64	124.84
chr1	65502844	65503298	455	6	67.67	29.72
chr1	65503708	65504693	986	19	203.54	53.5
chr1	65547552	65548344	793	11	110.58	35.67
chr1	65657726	65658613	888	27	333.46	107
chr1	65658783	65660557	1775	100	1430.38	190.23
chr1	65763319	65764889	1571	42	481.38	83.22
chr1	66030617	66031752	1136	22	232.65	47.56
chr1	66570250	66571517	1268	39	472.45	101.06
chr1	66771201	66772632	1432	39	451.9	77.28
chr1	66990247	66991737	1491	82	1169.73	124.84
chr1	67016760	67017322	563	7	73.85	29.72
chr1	67162293	67164422	2130	146	2197.86	208.06
chr1	67168036	67170095	2060	93	1243.42	148.62
chr1	67219499	67220122	624	10	108.89	41.61
chr1	67290944	67293168	2225	140	2057.08	160.5
chr1	67372910	67373432	523	10	116.99	41.61
chr1	67545393	67547014	1622	71	946.59	107
chr1	67664826	67665743	918	14	141.15	29.72
chr1	67665816	67669883	4068	320	3100	225.89
chr1	67922536	67925659	3124	148	1992	172.39
chr1	68070167	68072179	2013	46	493.84	83.22
chr1	68288530	68289131	602	13	152.83	53.5
chr1	68469062	68470326	1265	21	209	41.61
chr1	68734114	68736026	1913	113	1635.5	237.78
chr1	69805305	69807031	1727	42	464.25	59.45
chr1	70442958	70445241	2284	179	2790.95	249.67
chr1	70459349	70461641	2293	105	1406.52	142.67
chr1	70591491	70593795	2305	143	2091.78	237.78
chr1	70648519	70650428	1910	99	1380.73	178.34
chr1	71285067	71286237	1171	26	286.27	53.5
chr1	71317922	71320571	2650	108	1391.76	196.17
chr1	72520039	72524018	3980	218	3055.47	172.39
chr1	72861672	72861982	311	9	144.92	53.5
chr1	74435885	74437406	1522	88	1272.21	166.45
chr1	74911420	74912348	929	21	237.32	65.39
chr1	74970861	74972525	1665	140	2232.59	291.29
chr1	75363542	75364036	495	6	65.24	23.78
chr1	75373138	75374158	1021	14	134.57	41.61
chr1	75374413	75375294	882	17	184.46	53.5
chr1	75853222	75854815	1594	25	238.55	47.56
chr1	75961825	75964024	2200	118	1657.38	148.62
chr1	76023873	76027965	4093	185	2445.1	184.28
chr1	76312661	76313634	974	23	262.12	83.22
chr1	77068648	77069085	438	6	68.78	29.72
chr1	77105955	77106987	1033	19	199.66	35.67
chr1	77456644	77458676	2033	120	1734.54	243.73
chr1	77519836	77521467	1632	39	429.9	59.45
chr1	77920116	77922281	2166	146	2187.29	225.89
chr1	77925809	77926290	482	6	66.01	29.72
chr1	77996811	77998475	1665	111	1665.17	214.01
chr1	78017438	78018772	1335	76	1097.68	172.39
chr1	78126426	78127649	1224	33	384.75	71.34
chr1	78215838	78219122	3285	255	3100	255.62
chr1	78242506	78244423	1918	46	503.37	71.34
chr1	78283742	78285320	1579	58	734.39	107
chr1	78728970	78729538	569	9	99.49	35.67
chr1	78729675	78730241	567	9	99.63	29.72
chr1	78858596	78859492	897	14	142.59	29.72
chr1	78888045	78889274	1230	24	252.54	59.45
chr1	78889560	78890029	470	11	136.75	53.5
chr1	79278672	79279281	610	7	71.22	23.78
chr1	81544242	81544855	614	21	275.79	89.17
chr1	82038466	82040829	2364	55	589.84	71.34
chr1	82399935	82400397	463	6	67.17	23.78
chr1	83931031	83931564	534	8	88.63	35.67
chr1	84098630	84099487	858	18	200.74	59.45
chr1	84236680	84238137	1458	62	822.39	107
chr1	84314999	84317369	2371	164	2471.32	225.89
chr1	84382563	84385802	3240	175	2448.44	130.78
chr1	84428566	84429113	548	6	62.32	23.78
chr1	84536481	84538209	1729	116	1741.96	225.89
chr1	84540054	84541697	1644	38	414.06	53.5
chr1	84671761	84672266	506	8	77.37	35.67
chr1	84717239	84718701	1463	98	1475.8	196.17
chr1	84742849	84745673	2825	145	2002.18	172.39
chr1	84811348	84813163	1816	63	779.83	136.73
chr1	84858809	84859710	902	32	412.17	130.78
chr1	84927672	84929934	2263	91	1171.95	148.62
chr1	84997280	84997862	583	12	140.15	47.56
chr1	85130754	85132059	1306	23	232.71	47.56
chr1	85183341	85184029	689	8	79.18	29.72
chr1	85234496	85237073	2578	100	1252.89	142.67
chr1	85285687	85287237	1551	35	379.65	59.45
chr1	85300155	85300807	653	13	148.06	53.5
chr1	85437864	85440684	2821	164	2348.42	190.23
chr1	85496578	85498369	1792	88	1210.06	255.62
chr1	85513694	85515394	1701	88	1229.88	172.39
chr1	85702459	85703896	1438	42	497.42	59.45
chr1	85814444	85815942	1499	33	355.8	77.28
chr1	85817923	85818458	536	7	75.47	35.67
chr1	85818587	85819713	1127	20	205.89	41.61
chr1	85854118	85854840	723	11	115.16	35.67
chr1	85945209	85947100	1892	87	1171.96	160.5
chr1	86230542	86231435	894	10	92.62	29.72
chr1	86393262	86395321	2060	34	323.9	47.56
chr1	86633605	86635245	1641	112	1691.28	267.51
chr1	86941686	86944511	2826	153	2146.09	148.62
chr1	87151206	87154312	3107	188	2719.87	231.84
chr1	87369870	87371099	1230	23	238.7	53.5
chr1	87389938	87390452	515	6	64.1	23.78
chr1	87566012	87568162	2151	105	1435.44	148.62
chr1	87568858	87570451	1594	32	319.1	47.56
chr1	87572873	87574616	1744	44	492.13	83.22
chr1	88700737	88701285	549	16	204.45	71.34
chr1	88921112	88924293	3182	149	1997.79	172.39
chr1	89128697	89130744	2048	133	1973.94	237.78
chr1	89229896	89231972	2077	104	1433.46	160.5
chr1	89259817	89261242	1426	54	692.72	124.84
chr1	89303217	89303652	436	6	68.91	29.72
chr1	89308110	89308845	736	12	127.51	35.67
chr1	89363488	89364438	951	19	206.56	47.56
chr1	89435335	89437695	2361	116	1585.94	249.67
chr1	89437757	89438237	481	6	66.07	29.72
chr1	89509670	89511138	1469	31	330	65.39
chr1	89645539	89646038	500	11	133.63	59.45
chr1	89762295	89764241	1947	92	1248.45	172.39
chr1	89870596	89872758	2163	135	1980.01	172.39
chr1	90000706	90001960	1255	19	183.52	41.61
chr1	90058323	90060853	2531	122	1656.4	154.56
chr1	90081257	90082545	1289	58	785.34	136.73
chr1	90232613	90234579	1967	134	2016.25	237.78
chr1	90954857	90955236	380	7	85.2	41.61
chr1	90955655	90956391	737	13	140.99	47.56
chr1	90961512	90962056	545	8	87.87	29.72
chr1	91088799	91090054	1256	36	427.03	89.17
chr1	91258829	91260636	1808	104	1495.73	148.62
chr1	91625198	91625876	679	97	1780.62	362.62
chr1	91642052	91643148	1097	52	718.76	107
chr1	91738632	91740463	1832	79	1044.94	142.67
chr1	92123326	92124728	1403	28	293.56	65.39
chr1	92267773	92268930	1158	27	302.13	59.45
chr1	92318065	92319251	1187	103	1665.15	261.56
chr1	92536234	92538274	2041	129	1900.41	208.06
chr1	92718475	92719016	542	6	62.63	23.78
chr1	92720193	92725453	5261	215	2743.96	112.95
chr1	93022504	93023863	1360	32	354.94	83.22
chr1	93070140	93072262	2123	159	2451.57	214.01
chr1	93198717	93200581	1865	71	903.81	107
chr1	93316706	93319646	2941	172	2465.87	184.28
chr1	93416741	93419786	3046	155	2132.41	172.39
chr1	93583243	93586839	3597	212	3039.04	184.28
chr1	93685223	93687943	2721	140	1935.65	142.67
chr1	93918712	93920468	1757	43	475.89	95.11
chr1	94083897	94086820	2924	136	1822.17	172.39
chr1	94116348	94118058	1711	118	1785.52	249.67
chr1	94146663	94148711	2049	102	1403.89	148.62
chr1	94475279	94476014	736	11	114.27	35.67
chr1	94485110	94486106	997	19	202.62	41.61
chr1	94655782	94657890	2109	88	1148.25	142.67
chr1	94778965	94780729	1765	48	550.08	77.28
chr1	95058028	95059014	987	18	189.63	35.67
chr1	95163743	95166072	2330	82	1011.84	89.17
chr1	95200690	95201684	995	16	162.09	53.5
chr1	95310362	95311637	1276	64	893.8	219.95
chr1	95354925	95356510	1586	45	525.5	118.89
chr1	95471657	95473146	1490	74	1025.79	184.28
chr1	96959136	96961515	2380	137	1961.07	196.17
chr1	98157677	98160074	2398	124	1720.57	178.34
chr1	98282493	98283088	596	6	59.92	23.78
chr1	98283374	98284562	1189	29	328.43	59.45
chr1	98291316	98292791	1476	32	343.62	59.45
chr1	98899140	98900696	1557	37	408.21	71.34
chr1	99242375	99243563	1189	20	201.22	59.45
chr1	99502009	99503160	1152	17	164.51	41.61
chr1	100004250	100005137	888	31	381.58	142.67
chr1	100087491	100089437	1947	110	1571.73	184.28
chr1	100207300	100209294	1995	127	1856.54	214.01
chr1	100274746	100278112	3367	237	3100	214.01
chr1	100369975	100372226	2252	141	2068.54	225.89
chr1	100487003	100488374	1372	79	1143.74	231.84
chr1	100503431	100505425	1995	125	1837.75	237.78
chr1	100589476	100592128	2653	151	2150.96	184.28
chr1	100776836	100778550	1715	32	322.96	41.61
chr1	101085370	101085902	533	6	63.11	23.78
chr1	101132423	101135187	2765	177	2605.55	231.84
chr1	101263203	101264922	1720	155	2514.79	196.17
chr1	101473935	101476354	2420	37	338.5	41.61
chr1	103346261	103346874	614	7	71	35.67
chr1	103840492	103842358	1867	75	970.53	178.34
chr1	107400488	107402447	1960	140	2133.78	243.73
chr1	107484189	107485102	914	11	103.58	29.72
chr1	107485165	107486526	1362	20	189.43	29.72
chr1	107914431	107915262	832	16	174.73	59.45
chr1	108306088	108310294	4207	220	3039.44	214.01
chr1	108543182	108545246	2065	101	1382.74	124.84
chr1	108903590	108905427	1838	55	649.17	107
chr1	109004947	109005718	772	20	239.16	65.39
chr1	109035329	109038620	3292	265	3100	225.89
chr1	109090666	109092058	1393	82	1193.89	154.56
chr1	109220716	109222793	2078	102	1397.71	112.95
chr1	109306428	109307958	1531	62	809.29	136.73
chr1	109384842	109386970	2129	90	1178.75	118.89
chr1	109419320	109420534	1215	57	782.61	178.34
chr1	109434343	109436431	2089	96	1289.94	148.62
chr1	109443919	109445443	1525	73	1000.68	154.56
chr1	109457647	109458221	575	10	112.64	41.61
chr1	109557626	109559287	1662	70	921.99	160.5
chr1	109593448	109594223	776	23	285.12	101.06
chr1	109602550	109603049	500	7	77.77	35.67
chr1	109626868	109628046	1179	60	825.62	148.62
chr1	109740921	109742548	1628	40	445.08	71.34
chr1	109769239	109771659	2421	139	1987.69	190.23
chr1	109810332	109811637	1306	20	193.07	41.61
chr1	109827337	109829190	1854	50	570.14	77.28
chr1	109837949	109838795	847	41	576.35	172.39
chr1	109853351	109854630	1280	40	486.66	112.95
chr1	109891845	109893812	1968	98	1350.13	219.95
chr1	109963492	109965994	2503	122	1662.24	154.56
chr1	109967846	109968281	436	6	68.91	29.72
chr1	109999676	110000935	1260	48	619.99	148.62
chr1	110012336	110012774	439	6	68.71	29.72
chr1	110056073	110057026	954	14	138.77	35.67
chr1	110083894	110084871	978	24	276.54	65.39
chr1	110254401	110255527	1127	40	508.79	89.17
chr1	110328840	110330265	1426	70	968.37	142.67
chr1	110378195	110379862	1668	97	1401.67	160.5
chr1	110414371	110415268	898	25	300.9	77.28
chr1	110427548	110429184	1637	32	329.35	47.56
chr1	110494497	110495385	889	10	92.87	29.72
chr1	110553589	110556553	2965	87	1004.14	95.11
chr1	110681427	110683332	1906	98	1363.67	178.34
chr1	110683407	110684878	1472	89	1303.56	196.17
chr1	110750970	110752682	1713	121	1823.38	196.17
chr1	110899446	110899967	522	8	89.48	35.67
chr1	110950274	110952042	1769	37	387.9	65.39
chr1	111017918	111019761	1844	58	695.58	89.17
chr1	111216932	111219892	2961	88	1020.18	118.89
chr1	111306320	111306914	595	8	84.61	41.61
chr1	111307006	111308234	1229	37	446.09	95.11
chr1	111308357	111309132	776	32	433.28	124.84
chr1	111483097	111485445	2349	164	2477.92	219.95
chr1	111547723	111548819	1097	15	142.56	29.72
chr1	111690066	111691000	935	13	127.19	47.56
chr1	111792407	111794645	2239	159	2415.02	243.73
chr1	111817979	111818973	995	17	175.42	41.61
chr1	111859270	111860067	798	8	73.8	29.72
chr1	111963394	111965328	1935	80	1043.28	136.73
chr1	112082472	112084431	1960	38	385.4	59.45
chr1	112084439	112084850	412	8	84.21	41.61
chr1	112098919	112101239	2321	116	1594.48	178.34
chr1	112333226	112334718	1493	34	370.82	65.39
chr1	112681044	112681643	600	8	84.3	29.72
chr1	112739664	112741448	1785	84	1140.93	130.78
chr1	112810191	112810946	756	9	87.77	41.61
chr1	112845932	112846824	893	22	255.84	53.5
chr1	112852129	112852674	546	6	62.42	23.78
chr1	112852680	112853912	1233	25	252.28	47.56
chr1	112962059	112965190	3132	175	2473.96	160.5
chr1	113018222	113019972	1751	100	1436.26	124.84
chr1	113050580	113052002	1423	39	452.97	107
chr1	113058397	113059915	1519	26	243.73	53.5
chr1	113193684	113194536	853	14	145.71	41.61
chr1	113299106	113301183	2078	108	1504.8	142.67
chr1	113301341	113301966	626	8	82.72	29.72
chr1	113416799	113418578	1780	96	1356.26	202.12
chr1	113733678	113735981	2304	88	1114.78	118.89
chr1	114101411	114104153	2743	119	1562.5	124.84
chr1	114155071	114156681	1611	133	2112.03	273.45
chr1	114248014	114250279	2266	162	2464.67	225.89
chr1	114272465	114275204	2740	194	2937.03	237.78
chr1	114496552	114498214	1663	22	196.42	35.67
chr1	114690578	114691106	529	6	63.33	23.78
chr1	114853862	114856532	2671	126	1698.04	160.5
chr1	114924902	114926641	1740	66	841.07	190.23
chr1	115013604	115014854	1251	40	490.64	77.28
chr1	115059954	115061503	1550	65	856.92	172.39
chr1	115100507	115102514	2008	120	1740.95	255.62
chr1	115123593	115125177	1585	93	1348.71	184.28
chr1	115432710	115434345	1636	62	791.52	107
chr1	115442913	115444298	1386	43	519.89	95.11
chr1	115681381	115682545	1165	14	126.47	29.72
chr1	115985784	115987428	1645	65	840.21	107
chr1	116172300	116173102	803	27	345.39	65.39
chr1	116182688	116183626	939	13	126.95	35.67
chr1	116319700	116321366	1667	59	737.12	118.89
chr1	116496152	116496821	670	10	105.65	41.61
chr1	116511992	116513025	1034	18	185.96	41.61
chr1	116716674	116718931	2258	92	1189.72	101.06
chr1	116762091	116763452	1362	105	1642.96	303.17
chr1	116913943	116915357	1415	74	1042.34	166.45
chr1	116915486	116915876	391	7	85.2	41.61
chr1	117011059	117012360	1302	26	274.3	59.45
chr1	117253711	117255144	1434	48	577	101.06
chr1	117403112	117405275	2164	123	1757.09	178.34
chr1	117465239	117466718	1480	79	1117.8	237.78
chr1	117709880	117713722	3843	191	2601.19	196.17
chr1	117713841	117714352	512	7	76.98	35.67
chr1	117949208	117951908	2701	121	1604.96	130.78
chr1	118079150	118079791	642	8	81.79	23.78
chr1	118102596	118103357	762	16	180.98	71.34
chr1	118272789	118275062	2274	162	2462.21	225.89
chr1	118529130	118529912	783	12	124.18	41.61
chr1	119331680	119332221	542	6	62.63	23.78
chr1	119483766	119485694	1929	74	943.26	148.62
chr1	119671128	119672283	1156	17	164.25	47.56
chr1	119967268	119967985	718	13	142.51	41.61
chr1	119975364	119975887	524	6	63.6	23.78
chr1	119991315	119993161	1847	69	873.51	107
chr1	120055717	120057964	2248	107	1450.58	219.95
chr1	120412401	120413985	1585	31	319.85	53.5
chr1	120961768	120963180	1413	38	438.88	77.28
chr1	121052867	121053541	675	7	67.91	29.72
chr1	121055038	121055558	521	9	103.16	47.56
chr1	121185485	121187134	1650	249	3100	416.12
chr1	141560207	141560771	565	6	61.44	23.78
chr1	141831607	141832640	1034	66	989.96	202.12
chr1	142308581	142309475	895	26	316.82	77.28
chr1	142534616	142535858	1243	24	251.44	77.28
chr1	143230945	143231693	749	7	53.45	35.67
chr1	143231974	143232955	982	21	232.21	59.45
chr1	143244607	143245766	1160	17	164	41.61
chr1	143305029	143305983	955	24	279.05	71.34
chr1	143640013	143641398	1386	23	226.8	35.67
chr1	143641478	143644734	3257	317	3100	338.84
chr1	143750251	143751730	1480	58	750.62	118.89
chr1	143786223	143787622	1400	40	471.13	107
chr1	143803481	143804193	713	16	185.72	53.5
chr1	143807423	143809066	1644	98	1426.3	237.78
chr1	143920112	143921863	1752	29	279.91	53.5
chr1	144093890	144094491	602	7	71.65	23.78
chr1	144106898	144107826	929	58	867.97	154.56
chr1	144107910	144109924	2015	68	831.49	112.95
chr1	144109940	144110666	727	13	141.79	29.72
chr1	144126593	144127148	556	9	100.45	35.67
chr1	144148958	144152671	3714	210	2973.2	219.95
chr1	144180849	144182333	1485	85	1226.15	214.01
chr1	144183560	144186339	2780	83	965.37	118.89
chr1	144188324	144189467	1144	52	709.28	124.84
chr1	144218318	144219921	1604	78	1072.56	142.67
chr1	144226918	144228828	1911	89	1203.13	184.28
chr1	144259939	144260868	930	17	180.48	71.34
chr1	144274124	144274667	544	6	62.53	17.83
chr1	144286347	144288315	1969	92	1243.99	130.78
chr1	144300144	144301224	1081	38	483.06	101.06
chr1	144321309	144322990	1682	118	1794.25	279.4
chr1	144537715	144538532	818	12	121.82	41.61
chr1	145010330	145011295	966	18	191.33	65.39
chr1	145017832	145018592	761	14	152.83	41.61
chr1	145022201	145023839	1639	28	274.81	59.45
chr1	145109443	145112170	2728	163	2353.54	190.23
chr1	145163236	145164155	920	46	649.76	142.67
chr1	145180782	145182740	1959	155	2427.51	326.95
chr1	145479728	145480950	1223	18	172.76	35.67
chr1	145537060	145539155	2096	50	543.83	59.45
chr1	145607869	145609780	1912	93	1273.32	160.5
chr1	145867052	145868003	952	17	178.73	53.5
chr1	146184703	146186106	1404	24	238.78	47.56
chr1	146201971	146203168	1198	24	255.29	53.5
chr1	146219166	146219672	507	7	77.31	29.72
chr1	146241935	146242513	579	10	112.32	41.61
chr1	146256725	146257651	927	20	223.01	47.56
chr1	146272779	146274005	1227	35	415.14	59.45
chr1	146466754	146467481	728	14	155.61	53.5
chr1	146542767	146543434	668	16	190.38	65.39
chr1	146614441	146614823	383	6	71.42	35.67
chr1	146822363	146823069	707	14	157.44	59.45
chr1	147121530	147122124	595	12	139.04	41.61
chr1	147122223	147122851	629	8	82.55	29.72
chr1	147300856	147301453	598	7	59.82	29.72
chr1	147301673	147302242	570	13	156.04	53.5
chr1	147404224	147404772	549	6	62.26	23.78
chr1	147489691	147490528	838	10	95.52	41.61
chr1	147490609	147491872	1264	23	235.97	77.28
chr1	147553429	147553943	515	10	117.7	35.67
chr1	147565187	147566415	1229	36	430.43	112.95
chr1	147599477	147600047	571	6	61.14	23.78
chr1	148051205	148051654	450	10	123.93	47.56
chr1	148081528	148082361	834	20	232.33	59.45
chr1	148088043	148088683	641	16	193.33	77.28
chr1	148123094	148124968	1875	54	628.95	77.28
chr1	148125047	148127136	2090	76	950.51	95.11
chr1	148137592	148138498	907	41	564.08	136.73
chr1	148154893	148156368	1476	52	635.51	166.45
chr1	148165205	148167273	2069	96	1293.92	225.89
chr1	148248057	148249830	1774	36	373.39	71.34
chr1	148305172	148307086	1915	84	1115.45	136.73
chr1	148387626	148391023	3398	174	2394.73	166.45
chr1	148452383	148453216	834	8	61.07	35.67
chr1	148472727	148475922	3196	132	1702.14	172.39
chr1	148506600	148508901	2302	100	1318.25	172.39
chr1	148521226	148522017	792	9	85.86	29.72
chr1	148532479	148533918	1440	96	1444.32	315.06
chr1	148560245	148561759	1515	57	728.1	130.78
chr1	148602436	148605907	3472	168	2272.34	196.17
chr1	148725601	148727347	1747	79	1061.14	172.39
chr1	148754033	148755370	1338	39	463.36	101.06
chr1	148787649	148788774	1126	29	335.3	53.5
chr1	148800168	148801282	1115	23	248.52	59.45
chr1	148815759	148816163	405	7	71.05	35.67
chr1	148816227	148819523	3297	233	3100	214.01
chr1	148867427	148869471	2045	90	1194.36	166.45
chr1	148935571	148937082	1512	62	812.64	184.28
chr1	149003846	149005230	1385	34	381.85	89.17
chr1	149114422	149116604	2183	64	745.48	101.06
chr1	149164930	149166607	1678	60	751.8	112.95
chr1	149212271	149214577	2307	138	1998.02	166.45
chr1	149244722	149246216	1495	42	490.37	89.17
chr1	149247202	149248676	1475	51	635.66	107
chr1	149286422	149287754	1333	53	691.59	77.28
chr1	149297078	149299941	2864	131	1746.87	130.78
chr1	149309294	149310727	1434	74	1038.07	124.84
chr1	149369825	149370671	847	9	83.13	35.67
chr1	149371677	149372618	942	23	265.49	83.22
chr1	149384858	149386575	1718	61	762.03	124.84
chr1	149395424	149397122	1699	58	716.05	95.11
chr1	149403949	149406229	2281	106	1426.36	231.84
chr1	149428309	149429632	1324	112	1795.47	273.45
chr1	149437207	149438768	1562	71	958.16	136.73
chr1	149493462	149494930	1469	87	1267.14	214.01
chr1	149520375	149522861	2487	138	1953.32	184.28
chr1	149565657	149567717	2061	58	667.86	101.06
chr1	149585020	149586539	1520	41	472.09	89.17
chr1	149586606	149587209	604	16	197.59	77.28
chr1	149638262	149639942	1681	101	1472.49	196.17
chr1	149696961	149698705	1745	73	958.17	124.84
chr1	149712321	149713069	749	24	304.7	71.34
chr1	149749817	149750887	1071	19	196.66	53.5
chr1	149779022	149780485	1464	39	448.18	107
chr1	149851031	149852587	1557	75	1029.34	136.73
chr1	149959862	149960874	1013	15	147.81	29.72
chr1	150001553	150003203	1651	90	1277.51	166.45
chr1	150029073	150029671	599	8	84.36	35.67
chr1	150029827	150031119	1293	61	837.03	136.73
chr1	150076965	150078219	1255	34	396.38	101.06
chr1	150147740	150149639	1900	76	981.7	160.5
chr1	150232034	150233610	1577	34	362.8	65.39
chr1	150274902	150276366	1465	28	274.61	53.5
chr1	150347324	150347806	483	6	65.95	29.72
chr1	150349467	150350512	1046	25	284.19	65.39
chr1	150351495	150352014	520	6	63.82	29.72
chr1	150427779	150428688	910	33	427.41	95.11
chr1	150754244	150755029	786	12	123.97	53.5
chr1	151500198	151501198	1001	16	161.66	53.5
chr1	151774219	151775628	1410	40	469.9	95.11
chr1	151784329	151785229	901	29	347.57	77.28
chr1	151873042	151874042	1001	68	1037.49	231.84
chr1	151897585	151898692	1108	69	1026.2	214.01
chr1	151909017	151910250	1234	87	1313.63	172.39
chr1	151910373	151911342	970	17	177.33	47.56
chr1	151917884	151919090	1207	30	341.39	65.39
chr1	151937194	151937823	630	9	95.27	29.72
chr1	151966571	151967909	1339	66	915.85	172.39
chr1	152014182	152015511	1330	39	464.38	65.39
chr1	152022146	152023214	1069	25	281.82	83.22
chr1	152160410	152162197	1788	74	967.48	130.78
chr1	152162266	152163292	1027	61	898.09	154.56
chr1	152183716	152185965	2250	88	1123.75	112.95
chr1	152196369	152197916	1548	86	1229.11	142.67
chr1	152201531	152203616	2086	82	1050.84	178.34
chr1	152205593	152207963	2371	128	1798.85	178.34
chr1	152215642	152217403	1762	152	2438.01	249.67
chr1	152224863	152225952	1090	24	265.16	59.45
chr1	152229471	152231146	1676	89	1253.56	249.67
chr1	152420069	152422917	2849	108	1358.21	148.62
chr1	152458030	152461556	3527	190	2653.48	208.06
chr1	152511348	152512553	1206	55	749.38	148.62
chr1	152563535	152566113	2579	116	1541.86	130.78
chr1	152567161	152568061	901	18	196.86	47.56
chr1	152591432	152592383	952	16	165.2	41.61
chr1	152644142	152645794	1653	53	642.28	107
chr1	152740506	152741763	1258	23	236.45	47.56
chr1	152741805	152742459	655	9	93.66	29.72
chr1	152796110	152798838	2729	125	1668.97	154.56
chr1	152806827	152807627	801	8	73.66	35.67
chr1	152810823	152811352	530	6	63.27	23.78
chr1	152846218	152847327	1110	82	1274.73	196.17
chr1	152847581	152848382	802	14	136.07	47.56
chr1	152865887	152867412	1526	85	1216.13	196.17
chr1	152999480	153000141	662	13	147.26	65.39
chr1	153175314	153176928	1615	66	862.31	130.78
chr1	153194626	153195498	873	26	319.66	124.84
chr1	153199650	153201791	2142	113	1580.35	190.23
chr1	153212646	153215433	2788	106	1318.33	112.95
chr1	153221879	153223582	1704	95	1356.06	202.12
chr1	153238400	153239758	1359	25	255.74	47.56
chr1	153239935	153241157	1223	22	225.58	53.5
chr1	153241252	153243355	2104	68	818.86	112.95
chr1	153256395	153257138	744	12	126.93	47.56
chr1	153289366	153292230	2865	98	1191.91	148.62
chr1	153301972	153302519	548	6	62.32	23.78
chr1	153302589	153303515	927	28	344.08	101.06
chr1	153317860	153318425	566	6	61.39	29.72
chr1	153318583	153319116	534	6	63.06	23.78
chr1	153319689	153320267	579	7	72.93	23.78
chr1	153320863	153321454	592	6	60.11	23.78
chr1	153323852	153325067	1216	63	889.15	172.39
chr1	153366353	153367765	1413	29	306.73	65.39
chr1	153367781	153368375	595	8	84.61	29.72
chr1	153368494	153369050	557	6	61.85	29.72
chr1	153374015	153376417	2403	75	889.16	107
chr1	153378794	153380006	1213	74	1091.79	178.34
chr1	153411653	153412766	1114	54	732.89	112.95
chr1	153412888	153413453	566	9	99.71	41.61
chr1	153429852	153430468	617	8	83.26	29.72
chr1	153430710	153432189	1480	39	446.35	89.17
chr1	153444508	153446480	1973	86	1138.98	148.62
chr1	153462853	153463940	1088	46	616.12	142.67
chr1	153480437	153481319	883	14	130.5	53.5
chr1	153486683	153487460	778	24	300.68	101.06
chr1	153490965	153492421	1457	38	433.84	77.28
chr1	153497716	153499231	1516	92	1347.95	214.01
chr1	153508791	153510387	1597	56	682.48	136.73
chr1	153513406	153514849	1444	31	332.3	77.28
chr1	153531126	153531712	587	6	60.35	23.78
chr1	153544840	153546678	1839	146	2290.58	214.01
chr1	153546916	153547379	464	7	80.25	29.72
chr1	153559022	153561901	2880	104	1270.94	112.95
chr1	153798095	153800721	2627	138	1920.77	154.56
chr1	153845970	153846752	783	29	381.42	118.89
chr1	153873538	153874384	847	14	146.15	53.5
chr1	153924315	153926118	1804	119	1777.49	148.62
chr1	153981413	153982131	719	15	170.62	59.45
chr1	154092846	154094013	1168	54	739.47	160.5
chr1	154095305	154096304	1000	15	148.66	47.56
chr1	154096465	154097369	905	26	315.55	77.28
chr1	154147075	154148463	1389	39	457.04	89.17
chr1	154169674	154171592	1919	78	1012.18	214.01
chr1	154206876	154207457	582	6	60.59	23.78
chr1	154211059	154212225	1167	18	176.43	41.61
chr1	154212265	154215892	3628	153	1981.91	142.67
chr1	154256354	154257752	1399	48	598.22	148.62
chr1	154289099	154292467	3369	189	2672.64	231.84
chr1	154312817	154313552	736	8	76.76	29.72
chr1	154317376	154319649	2274	77	939.06	154.56
chr1	154350771	154353143	2373	54	574.47	71.34
chr1	154390913	154391517	605	9	96.94	47.56
chr1	154397232	154398190	959	18	191.91	47.56
chr1	154429714	154431204	1491	71	972.45	184.28
chr1	154448865	154450371	1507	74	1022.16	208.06
chr1	154452730	154453409	680	47	729.84	148.62
chr1	154482013	154482473	461	6	67.3	23.78
chr1	154517911	154520164	2254	94	1224.38	142.67
chr1	154527528	154528220	693	9	91.34	29.72
chr1	154531288	154532381	1094	25	279.3	95.11
chr1	154572657	154575503	2847	146	2015.23	243.73
chr1	154605405	154606054	650	8	81.33	35.67
chr1	154624655	154625276	622	13	150.91	53.5
chr1	154636839	154637431	593	6	60.06	23.78
chr1	154658104	154658751	648	9	94.1	29.72
chr1	154672311	154673155	845	11	107.44	47.56
chr1	154693064	154693853	790	18	207.32	53.5
chr1	154735272	154737984	2713	136	1865.97	154.56
chr1	154794438	154794825	388	8	99.49	47.56
chr1	154808133	154809376	1244	22	223.95	47.56
chr1	154818419	154818947	529	8	88.99	35.67
chr1	154827605	154829110	1506	58	746.25	190.23
chr1	154837187	154838362	1176	113	1873.72	225.89
chr1	154861523	154862269	747	11	113.54	29.72
chr1	154878028	154878732	705	13	143.58	47.56
chr1	154912985	154913510	526	6	63.49	23.78
chr1	154941891	154942321	431	7	82.71	35.67
chr1	154963927	154966015	2089	130	1906.18	214.01
chr1	154976464	154977585	1122	75	1135.92	172.39
chr1	154983184	154984024	841	11	107.68	35.67
chr1	154984866	154989515	4650	272	3100	225.89
chr1	155002752	155003660	909	32	411.08	107
chr1	155003827	155005429	1603	118	1818.83	249.67
chr1	155050089	155050877	789	13	137.02	59.45
chr1	155095308	155096082	775	14	151.69	41.61
chr1	155096553	155097160	608	7	71.32	23.78
chr1	155097198	155097775	578	11	126.34	41.61
chr1	155129470	155130611	1142	17	165.16	35.67
chr1	155163706	155164450	745	10	100.83	41.61
chr1	155281628	155283154	1527	66	878.29	107
chr1	155373539	155375790	2252	127	1808.93	142.67
chr1	155636964	155637997	1034	17	172.55	41.61
chr1	156229425	156230685	1261	27	292.13	53.5
chr1	156349584	156350320	737	22	274.47	89.17
chr1	156385928	156386768	841	14	146.59	41.61
chr1	156417187	156418139	953	29	356.42	89.17
chr1	157246215	157249150	2936	120	1544.67	160.5
chr1	157407696	157408603	908	13	128.88	35.67
chr1	157538778	157539173	396	6	71.42	35.67
chr1	157539958	157540538	581	6	60.64	23.78
chr1	158017332	158018163	832	33	440.36	95.11
chr1	158090538	158091743	1206	37	449.12	77.28
chr1	158092020	158092577	558	7	74.14	35.67
chr1	158158179	158159084	906	14	141.97	47.56
chr1	158159861	158162617	2757	158	2253.9	202.12
chr1	158181854	158182436	583	8	85.36	29.72
chr1	158267112	158269208	2097	136	2016.97	208.06
chr1	158306449	158307538	1090	38	481.69	101.06
chr1	158320062	158320923	862	21	244.24	77.28
chr1	158334002	158335860	1859	50	569.56	77.28
chr1	158441349	158442672	1324	50	642.81	118.89
chr1	158497633	158499531	1899	128	1902.43	273.45
chr1	158520440	158521757	1318	59	797.08	136.73
chr1	158578211	158578796	586	6	60.4	23.78
chr1	158578815	158580668	1854	175	2870.09	255.62
chr1	158636595	158637818	1224	37	446.74	65.39
chr1	158815037	158815520	484	6	65.89	23.78
chr1	159098401	159099200	800	18	206.32	53.5
chr1	159218456	159218884	429	6	69.38	23.78
chr1	159256581	159258170	1590	90	1292.17	136.73
chr1	159274553	159275710	1158	54	741.48	160.5
chr1	159280469	159283334	2866	159	2245.74	172.39
chr1	159304851	159306614	1764	47	535	95.11
chr1	159334218	159335413	1196	20	200.71	47.56
chr1	159353497	159355177	1681	146	2347.36	279.4
chr1	159368348	159370237	1890	86	1154.92	202.12
chr1	159389634	159391092	1459	92	1363.23	190.23
chr1	159395448	159396716	1269	59	806.78	142.67
chr1	159401998	159402680	683	10	104.77	35.67
chr1	159402778	159403909	1132	48	642.33	130.78
chr1	159413104	159414232	1129	65	946.24	178.34
chr1	159438330	159439594	1265	80	1190.38	243.73
chr1	159462267	159463382	1116	38	477.79	95.11
chr1	159494974	159495658	685	19	234.14	89.17
chr1	159541411	159542878	1468	65	872.2	219.95
chr1	159550389	159551731	1343	82	1206.88	190.23
chr1	159625932	159627290	1359	39	460.73	77.28
chr1	159635203	159637180	1978	117	1693	202.12
chr1	159642328	159642798	471	10	121.82	53.5
chr1	159676100	159677312	1213	31	355.71	112.95
chr1	159760314	159760973	660	21	253.06	83.22
chr1	159766800	159767705	906	13	129.01	41.61
chr1	159776138	159776911	774	10	99.1	35.67
chr1	159962133	159964056	1924	43	459.13	77.28
chr1	159985872	159987359	1488	102	1525.81	237.78
chr1	160001505	160003799	2295	102	1354.06	178.34
chr1	160259885	160261111	1227	36	430.68	89.17
chr1	160305596	160307112	1517	51	629.47	83.22
chr1	160733734	160735439	1706	103	1503.2	202.12
chr1	160797079	160798896	1818	80	1064.79	142.67
chr1	161027220	161028014	795	10	97.89	35.67
chr1	161557394	161559344	1951	98	1353.8	154.56
chr1	162556996	162557558	563	7	73.85	29.72
chr1	162794090	162797307	3218	94	1080.96	89.17
chr1	163471194	163472121	928	21	237.42	47.56
chr1	163611761	163612387	627	11	122.26	35.67
chr1	163680668	163681251	584	7	72.65	29.72
chr1	163833685	163834606	922	26	313.43	101.06
chr1	163865795	163868113	2319	93	1196.01	148.62
chr1	163933516	163935119	1604	74	1002.19	172.39
chr1	164003711	164005793	2083	142	2135.16	214.01
chr1	164062891	164065371	2481	165	2458.23	178.34
chr1	164392711	164393090	380	6	71.42	35.67
chr1	164400963	164401463	501	7	77.7	23.78
chr1	164401686	164403697	2012	52	582.43	71.34
chr1	164578914	164579177	264	8	160.8	47.56
chr1	164725194	164726567	1374	26	268.24	53.5
chr1	165074638	165076719	2082	89	1170.25	118.89
chr1	165111170	165112848	1679	72	953.13	142.67
chr1	165156222	165157322	1101	19	194.36	59.45
chr1	165183275	165183926	652	8	81.22	29.72
chr1	165210788	165212349	1562	43	497.67	83.22
chr1	165279607	165280338	732	28	373.14	101.06
chr1	165357130	165357779	650	12	134.24	41.61
chr1	165455191	165458849	3659	147	1874.8	130.78
chr1	165559887	165560438	552	6	62.11	29.72
chr1	165564916	165565512	597	6	59.87	17.83
chr1	165674922	165675811	890	14	143.07	35.67
chr1	165690315	165692292	1978	85	1120.86	107
chr1	165788534	165790478	1945	80	1041.5	136.73
chr1	165865509	165868217	2709	88	1037.73	136.73
chr1	165949173	165952491	3319	136	1748.22	118.89
chr1	165956949	165959107	2159	112	1558.52	160.5
chr1	166170857	166174130	3274	217	3219.64	225.89
chr1	166371534	166373567	2034	55	625.23	77.28
chr1	166414236	166415893	1658	105	1553.49	196.17
chr1	166461272	166462675	1404	76	1081.08	142.67
chr1	167341036	167343999	2964	128	1675.93	148.62
chr1	167602799	167605149	2351	139	2005.28	184.28
chr1	167662532	167663753	1222	39	478.7	95.11
chr1	167695909	167696588	680	23	298.55	77.28
chr1	167720201	167722857	2657	107	1373.66	124.84
chr1	167943789	167944412	624	7	70.47	23.78
chr1	167944949	167947793	2845	51	478.84	59.45
chr1	168029805	168031645	1841	140	2171.7	225.89
chr1	168128333	168130347	2015	116	1665.21	202.12
chr1	168309642	168311019	1378	70	978.75	237.78
chr1	168767051	168768996	1946	93	1266.25	136.73
chr1	168900088	168901032	945	13	126.58	41.61
chr1	169486993	169487735	743	13	127	41.61
chr1	169720420	169722959	2540	146	2086.96	166.45
chr1	169976776	169978995	2220	113	1562.92	148.62
chr1	170016500	170017129	630	10	108.46	35.67
chr1	170017290	170018545	1256	50	654.25	124.84
chr1	170076536	170078709	2174	76	937.64	112.95
chr1	170416910	170417413	504	6	64.72	23.78
chr1	170678892	170680119	1228	70	1013.75	196.17
chr1	170767225	170770380	3156	188	2707.21	309.12
chr1	171438329	171438879	551	6	62.16	23.78
chr1	171439488	171441601	2114	57	646.33	83.22
chr1	171442394	171443462	1069	16	157.04	41.61
chr1	171642287	171642935	649	9	94.04	35.67
chr1	171712276	171714668	2393	143	2068.67	190.23
chr1	171905169	171905717	549	7	74.68	29.72
chr1	171950108	171952101	1994	133	1989.3	225.89
chr1	172059159	172061536	2378	148	2165.86	225.89
chr1	172099818	172100803	986	16	162.72	47.56
chr1	172100857	172105047	4191	275	3100	303.17
chr1	172256841	172258870	2030	116	1661.5	208.06
chr1	172394137	172396475	2339	93	1192.57	136.73
chr1	173035115	173036399	1285	31	347.95	71.34
chr1	173110077	173110576	500	7	77.77	29.72
chr1	173226103	173226895	793	21	251.97	89.17
chr1	173234514	173237425	2912	142	1930.1	196.17
chr1	173258471	173259697	1227	93	1451.93	243.73
chr1	173427270	173429123	1854	51	585.37	89.17
chr1	173834838	173835374	537	6	62.9	23.78
chr1	174441151	174444237	3087	149	2017.19	166.45
chr1	176273105	176274241	1137	34	410.97	107
chr1	176328767	176330780	2014	77	979.26	89.17
chr1	176722349	176723124	776	13	137.99	53.5
chr1	176777583	176779435	1853	94	1303.75	142.67
chr1	176960084	176962438	2355	90	1139.69	136.73
chr1	177260813	177262944	2132	126	1820.4	219.95
chr1	177317112	177319175	2064	111	1562.12	166.45
chr1	177464433	177466167	1735	62	775.8	136.73
chr1	177529094	177530622	1529	77	1070.84	166.45
chr1	177601178	177602570	1393	53	681.48	136.73
chr1	177811475	177812274	800	10	97.61	29.72
chr1	177822171	177822622	452	6	67.87	29.72
chr1	177978530	177979762	1233	22	224.8	47.56
chr1	177979840	177980266	427	9	111.49	41.61
chr1	178050448	178051317	870	17	185.49	59.45
chr1	178112566	178114199	1634	43	489.32	83.22
chr1	178117206	178119639	2434	216	3100	297.23
chr1	178119789	178120232	444	6	68.38	29.72
chr1	178189563	178191761	2199	113	1567.55	166.45
chr1	178191940	178192537	598	6	59.82	23.78
chr1	178389468	178391779	2312	116	1596.42	154.56
chr1	178464527	178466168	1642	45	518.77	65.39
chr1	178466289	178467179	891	17	183.69	47.56
chr1	178737350	178739320	1971	135	2034.21	202.12
chr1	178867759	178868834	1076	81	1266.19	178.34
chr1	179147564	179149545	1982	44	467.98	95.11
chr1	179189497	179190426	930	13	127.5	41.61
chr1	179257397	179258798	1402	100	1532.5	214.01
chr1	179269458	179270214	757	20	240.89	95.11
chr1	179324107	179326727	2621	108	1379.93	130.78
chr1	179340296	179341553	1258	37	442.34	77.28
chr1	179425553	179426055	503	6	64.78	29.72
chr1	179552838	179553872	1035	12	109.27	23.78
chr1	180264852	180266297	1446	43	512	95.11
chr1	180624869	180628471	3603	161	2123.93	124.84
chr1	180824237	180825322	1086	64	938.63	214.01
chr1	180839555	180840174	620	7	70.68	35.67
chr1	180850371	180851266	896	14	142.66	41.61
chr1	181024664	181025941	1278	46	583.95	95.11
chr1	181074685	181076775	2091	118	1683.25	190.23
chr1	181188385	181188976	592	8	84.79	35.67
chr1	181258113	181260122	2010	58	674.09	77.28
chr1	181260140	181260628	489	6	65.59	29.72
chr1	181421604	181422343	740	13	140.75	35.67
chr1	181706487	181709498	3012	118	1497.97	136.73
chr1	181870016	181872324	2309	111	1508.45	166.45
chr1	182040574	182041432	859	24	290.21	65.39
chr1	182271857	182273696	1840	52	602.38	89.17
chr1	182287114	182288647	1534	120	1880.73	237.78
chr1	182388048	182389070	1023	15	147.16	35.67
chr1	182621651	182624507	2857	110	1390.16	112.95
chr1	182989199	182990692	1494	119	1874.63	208.06
chr1	182990903	182991689	787	37	518.07	172.39
chr1	183208843	183210731	1889	81	1068.7	118.89
chr1	183280836	183282775	1940	83	1093.58	136.73
chr1	183391305	183394065	2761	163	2345.09	196.17
chr1	183551336	183554014	2679	128	1731.54	166.45
chr1	183969668	183970435	768	18	209.57	65.39
chr1	184609491	184612621	3131	227	3100	231.84
chr1	184915395	184917573	2179	103	1394.38	166.45
chr1	185064309	185065511	1203	63	892.09	196.17
chr1	185065659	185066093	435	6	68.98	29.72
chr1	185308177	185308696	520	8	89.63	41.61
chr1	190394092	190394934	843	18	202.15	53.5
chr1	190394979	190396454	1476	27	273.74	71.34
chr1	190919116	190919323	208	8	210.28	47.56
chr1	191043993	191045267	1275	50	650.99	142.67
chr1	191293760	191296597	2838	198	2984.33	243.73
chr1	191339592	191341913	2322	99	1297.39	148.62
chr1	191357216	191359003	1788	109	1593.54	178.34
chr1	191654155	191654868	714	15	171.09	71.34
chr1	194843629	194845357	1729	40	434.72	59.45
chr1	194887163	194887773	611	7	71.16	23.78
chr1	194888175	194888702	528	7	75.97	29.72
chr1	194888714	194889318	605	8	83.99	29.72
chr1	195380950	195383136	2187	127	1824.98	190.23
chr1	195436016	195438279	2264	132	1897.9	249.67
chr1	195590389	195590780	392	6	71.42	35.67
chr1	195895107	195895381	275	7	129.39	41.61
chr1	196009226	196011451	2226	94	1229.43	142.67
chr1	196137660	196139202	1543	54	674.3	142.67
chr1	196153440	196154097	658	8	80.88	29.72
chr1	196391935	196395432	3498	180	2480.03	154.56
chr1	196874861	196877935	3075	167	2341.87	184.28
chr1	197168714	197173522	4809	220	2913.26	142.67
chr1	198167684	198168191	508	6	64.49	23.78
chr1	198264554	198265500	947	24	279.93	59.45
chr1	198274750	198276079	1330	28	300.04	59.45
chr1	198278251	198278857	607	7	71.38	29.72
chr1	198537508	198538866	1359	53	687.15	142.67
chr1	198644796	198646590	1795	63	782.99	136.73
chr1	198855634	198857386	1753	81	1094.82	142.67
chr1	198904682	198906443	1762	75	989.26	160.5
chr1	198974047	198975867	1821	29	275.12	41.61
chr1	199108748	199109665	918	13	128.25	53.5
chr1	199126656	199127190	535	8	88.56	35.67
chr1	199258300	199259729	1430	37	421.8	65.39
chr1	199350056	199350940	885	28	349.77	95.11
chr1	199389206	199390600	1395	46	566.49	101.06
chr1	199406554	199407508	955	19	206.21	47.56
chr1	199518999	199519572	574	9	99.12	41.61
chr1	199634807	199635762	956	16	151.64	47.56
chr1	199703946	199705576	1631	52	629.39	118.89
chr1	199716278	199716855	578	6	60.79	29.72
chr1	199742102	199743331	1230	44	558.53	160.5
chr1	199774459	199776402	1944	93	1266.66	101.06
chr1	199883924	199884918	995	15	148.99	29.72
chr1	199885777	199886466	690	11	117.48	41.61
chr1	199975476	199976485	1010	13	122.76	23.78
chr1	200064748	200066109	1362	70	982.29	225.89
chr1	200124055	200124977	923	22	252.64	65.39
chr1	200182097	200182737	641	9	94.55	41.61
chr1	200190696	200192285	1590	130	2059.66	279.4
chr1	200217865	200219448	1584	79	1094.58	154.56
chr1	200378959	200381113	2155	103	1399.3	118.89
chr1	200394673	200396725	2053	65	778.17	101.06
chr1	200429447	200430126	680	13	145.69	47.56
chr1	200449754	200450576	823	11	108.74	29.72
chr1	200577019	200578145	1127	60	855.27	273.45
chr1	200584302	200585672	1371	88	1312.05	196.17
chr1	200945249	200945805	557	6	61.85	23.78
chr1	201041955	201044693	2739	100	1243.59	118.89
chr1	201046178	201047574	1397	54	697.52	154.56
chr1	201096379	201098203	1825	72	927.22	112.95
chr1	201123870	201125181	1312	72	1030	148.62
chr1	201162250	201163443	1194	69	1003.79	166.45
chr1	201192923	201194543	1621	78	1069.01	142.67
chr1	201202129	201203797	1669	48	561.64	101.06
chr1	201241901	201244151	2251	115	1591.88	196.17
chr1	201261849	201262486	638	11	121.39	47.56
chr1	201311191	201311844	654	9	93.72	35.67
chr1	201363101	201363629	529	8	88.99	41.61
chr1	201363748	201364293	546	6	62.42	29.72
chr1	201503123	201503625	503	19	260.33	101.06
chr1	201540576	201542731	2156	77	956.69	112.95
chr1	201562727	201563917	1191	21	214.5	47.56
chr1	201862390	201865678	3289	104	1228.23	107
chr1	202005346	202005806	461	9	108.27	47.56
chr1	202031360	202032699	1340	59	775.58	107
chr1	202097282	202098684	1403	111	1727.73	214.01
chr1	202308535	202310571	2037	42	434.53	71.34
chr1	202387042	202388502	1461	45	541.46	77.28
chr1	202613330	202614461	1132	25	275.58	71.34
chr1	202617983	202618620	638	10	94.75	47.56
chr1	202642647	202648106	5460	408	3100	267.51
chr1	202729407	202731445	2039	63	748.44	118.89
chr1	202742855	202743786	932	25	296.82	71.34
chr1	202751747	202752932	1186	72	1061.56	166.45
chr1	202887604	202888352	749	12	126.57	53.5
chr1	202920557	202921439	883	18	198.46	41.61
chr1	202921516	202921778	263	6	114.23	35.67
chr1	203064068	203064573	506	7	77.37	35.67
chr1	203278251	203279191	941	11	102.16	23.78
chr1	203356758	203358004	1247	72	1045.88	219.95
chr1	203358068	203358757	690	28	363.44	89.17
chr1	203446275	203448107	1833	89	1219.13	154.56
chr1	203463098	203464902	1805	41	441.76	59.45
chr1	203556903	203557814	912	11	103.69	41.61
chr1	203578917	203580096	1180	25	271.05	71.34
chr1	203666282	203666953	672	10	105.51	35.67
chr1	203691284	203691710	427	6	69.52	29.72
chr1	203692371	203693337	967	13	125.26	29.72
chr1	203740103	203741474	1372	34	383.24	71.34
chr1	203804207	203805274	1068	26	296.71	65.39
chr1	203827570	203828219	650	11	120.46	47.56
chr1	203866124	203868631	2508	141	2003.07	172.39
chr1	203914720	203916760	2041	57	654.92	71.34
chr1	203983906	203986102	2197	90	1166.57	142.67
chr1	204010213	204011307	1095	39	497.31	107
chr1	204047876	204049730	1855	79	1040.69	130.78
chr1	204085285	204085987	703	18	216.65	77.28
chr1	204389831	204390999	1169	23	243.78	59.45
chr1	204471788	204473119	1332	38	448.59	95.11
chr1	204710006	204711518	1513	79	1110.26	202.12
chr1	204746711	204747797	1087	24	265.45	71.34
chr1	204797073	204798467	1395	37	425.77	71.34
chr1	204851409	204852825	1417	70	970.29	243.73
chr1	204874891	204876445	1555	64	838.98	124.84
chr1	204924471	204926680	2210	94	1232.35	101.06
chr1	205149021	205150262	1242	29	322.93	59.45
chr1	205290015	205291471	1457	114	1768.66	225.89
chr1	205292637	205293691	1055	63	928.04	166.45
chr1	205560854	205562612	1759	100	1434.29	172.39
chr1	205693985	205694988	1004	22	244.52	41.61
chr1	205735930	205736729	800	14	149.71	35.67
chr1	205884560	205885477	918	27	329.52	89.17
chr1	205909108	205910132	1025	15	147.03	47.56
chr1	205991654	205993332	1679	121	1853.15	214.01
chr1	206062652	206063422	771	13	138.36	41.61
chr1	206107752	206109620	1869	70	886.54	89.17
chr1	206148240	206149380	1141	23	246.21	53.5
chr1	206149504	206152037	2534	134	1869.8	142.67
chr1	206198720	206199918	1199	35	418.65	77.28
chr1	206203047	206203864	818	13	134.92	53.5
chr1	206482969	206484879	1911	31	295.01	35.67
chr1	206972676	206972924	249	6	114.23	35.67
chr1	207228674	207229193	520	6	63.82	23.78
chr1	207447644	207448242	599	6	59.77	23.78
chr1	207471332	207472315	984	17	176.25	41.61
chr1	207914985	207916231	1247	22	223.72	41.61
chr1	207987426	207988048	623	12	136.54	41.61
chr1	207996169	207997479	1311	20	192.74	41.61
chr1	208023851	208024829	979	28	337.39	95.11
chr1	208045769	208046608	840	16	174.05	41.61
chr1	208067582	208068402	821	40	564.1	136.73
chr1	208177898	208178763	866	14	144.77	41.61
chr1	208471990	208473438	1449	31	317.64	53.5
chr1	208473654	208474308	655	9	93.66	35.67
chr1	208490788	208491980	1193	24	255.72	53.5
chr1	208492475	208493026	552	7	74.5	23.78
chr1	208532174	208532991	818	27	343.2	95.11
chr1	208550915	208551677	763	16	180.89	47.56
chr1	208568240	208569771	1532	78	1088.06	130.78
chr1	209373698	209374569	872	11	105.89	29.72
chr1	209497792	209499272	1481	52	651.05	112.95
chr1	209499343	209501357	2015	95	1287.29	136.73
chr1	209566361	209567865	1505	52	647.44	95.11
chr1	209622339	209623623	1285	60	821.08	190.23
chr1	209718870	209719466	597	6	59.87	23.78
chr1	209755260	209756004	745	15	154.16	47.56
chr1	209816879	209820089	3211	110	1335.13	107
chr1	209914772	209916149	1378	59	785.69	136.73
chr1	210069555	210071278	1724	61	761.12	101.06
chr1	210274285	210277406	3122	185	2660.33	237.78
chr1	210524348	210527514	3167	213	3155.24	208.06
chr1	210653991	210655288	1298	72	1033.35	172.39
chr1	210672329	210673651	1323	66	919.29	118.89
chr1	210754612	210755452	841	9	83.42	29.72
chr1	210798261	210799414	1154	38	472.25	89.17
chr1	210806423	210807188	766	23	286.43	89.17
chr1	210846745	210847331	587	7	72.48	23.78
chr1	210847407	210850030	2624	76	876.35	89.17
chr1	210905100	210905580	481	8	92.55	41.61
chr1	210938663	210940832	2170	45	464.96	53.5
chr1	211030838	211032648	1811	149	2359.99	279.4
chr1	211097420	211099555	2136	106	1456.36	154.56
chr1	211190103	211191678	1576	37	406.28	53.5
chr1	211254148	211255847	1700	99	1430.55	208.06
chr1	211290767	211292120	1354	64	877.33	166.45
chr1	211453341	211453805	465	6	67.05	23.78
chr1	212222657	212223318	662	7	68.54	29.72
chr1	212227695	212228172	478	6	66.25	23.78
chr1	212228232	212228764	533	6	63.11	23.78
chr1	212520275	212522192	1918	115	1671.32	178.34
chr1	212704465	212705039	575	6	60.94	29.72
chr1	212790722	212792486	1765	59	722.59	112.95
chr1	212842542	212844238	1697	60	748.89	118.89
chr1	213322595	213323186	592	17	214.62	59.45
chr1	213806364	213808477	2114	137	2031.13	202.12
chr1	214771151	214771926	776	15	165.52	65.39
chr1	214840759	214841847	1089	24	265.26	65.39
chr1	215329512	215329992	481	7	79.05	35.67
chr1	215374970	215376013	1044	15	145.82	41.61
chr1	215377205	215377900	696	7	66.91	23.78
chr1	215870230	215871710	1481	81	1153.88	178.34
chr1	216404125	216405953	1829	35	354.86	41.61
chr1	216524550	216526454	1905	102	1435.96	142.67
chr1	216585328	216587032	1705	31	310.13	41.61
chr1	217413475	217414947	1473	79	1119.42	196.17
chr1	218167675	218168645	971	22	247.75	53.5
chr1	218285291	218286967	1677	124	1912.1	255.62
chr1	218329147	218330481	1335	48	607.96	112.95
chr1	218333773	218334981	1209	71	1036.99	190.23
chr1	218511198	218512841	1644	92	1315.68	214.01
chr1	218767854	218769295	1442	38	435.54	65.39
chr1	218929976	218931086	1111	33	398.65	89.17
chr1	218931703	218932082	380	7	85.2	41.61
chr1	218987835	218988917	1083	35	434.14	77.28
chr1	219026281	219027505	1225	26	281.18	41.61
chr1	219050351	219050943	593	6	60.06	23.78
chr1	219116761	219117302	542	7	75.1	23.78
chr1	219118331	219119301	971	19	204.82	47.56
chr1	219119459	219121469	2011	60	705.04	65.39
chr1	219133751	219134619	869	21	243.49	77.28
chr1	219963697	219964308	612	7	59.16	17.83
chr1	219980243	219982177	1935	114	1648.41	142.67
chr1	219982290	219983596	1307	57	764.55	83.22
chr1	220704918	220705798	881	13	130.63	47.56
chr1	220828851	220830547	1697	101	1468.35	219.95
chr1	220857366	220859296	1931	93	1269.35	124.84
chr1	220883605	220885025	1421	115	1820.62	249.67
chr1	220951109	220954095	2987	192	2827.05	178.34
chr1	221054710	221055860	1151	79	1203.96	219.95
chr1	221382617	221383600	984	15	149.73	59.45
chr1	221603237	221603897	661	8	80.71	29.72
chr1	221603935	221605199	1265	27	291.76	71.34
chr1	221633180	221634017	838	12	120.53	47.56
chr1	221966333	221967811	1479	37	416.42	71.34
chr1	222003106	222003762	657	9	93.53	23.78
chr1	222098841	222101397	2557	114	1511.46	142.67
chr1	222246523	222247276	754	9	87.87	47.56
chr1	222367832	222369769	1938	93	1267.9	178.34
chr1	222436716	222438792	2077	111	1559.12	136.73
chr1	222583629	222585402	1774	108	1578.57	219.95
chr1	222595208	222595776	569	7	73.5	29.72
chr1	222606889	222607343	455	7	80.9	35.67
chr1	222611095	222612105	1011	58	846.59	160.5
chr1	222687092	222690182	3091	123	1568.44	148.62
chr1	222870125	222871315	1191	20	201.07	47.56
chr1	222910860	222911443	584	7	72.65	35.67
chr1	223183724	223184872	1149	53	708.29	130.78
chr1	223680580	223683325	2746	131	1770.56	136.73
chr1	223721466	223722395	930	16	166.85	35.67
chr1	223906302	223908694	2393	62	690.19	65.39
chr1	223931672	223932170	499	9	104.96	41.61
chr1	224031320	224032088	769	11	112.1	35.67
chr1	224032109	224033461	1353	91	1374.18	166.45
chr1	224063973	224065075	1103	32	384.05	101.06
chr1	224111530	224111903	374	7	85.2	41.61
chr1	224124582	224124959	378	6	71.42	35.67
chr1	224135416	224137747	2332	95	1227.52	124.84
chr1	224177654	224179285	1632	105	1541.8	202.12
chr1	224252242	224253829	1588	98	1441	184.28
chr1	224315689	224319646	3958	209	2897.76	148.62
chr1	224336947	224338608	1662	29	286.46	47.56
chr1	224354645	224355507	863	10	94.2	29.72
chr1	224363795	224365615	1821	59	698.72	95.11
chr1	224375372	224377292	1921	49	547.52	71.34
chr1	224439902	224441755	1854	99	1393.45	154.56
chr1	224477421	224478881	1461	43	510.08	101.06
chr1	224562225	224564535	2311	92	1180.54	148.62
chr1	224660651	224662887	2237	117	1630.88	184.28
chr1	224802687	224804730	2044	27	236.15	35.67
chr1	224934073	224934774	702	19	232.06	83.22
chr1	224957397	224958584	1188	36	435.74	124.84
chr1	224991242	224994058	2817	148	2057.82	184.28
chr1	225124471	225125562	1092	30	354.46	101.06
chr1	225193507	225194354	848	39	540.84	112.95
chr1	225194494	225195790	1297	77	1125.74	148.62
chr1	225570396	225571297	902	12	116.59	29.72
chr1	225571367	225573690	2324	99	1297.02	118.89
chr1	225796214	225797371	1158	40	504.06	89.17
chr1	225813140	225813786	647	7	69.29	29.72
chr1	225815207	225815753	547	6	62.37	23.78
chr1	225817728	225818881	1154	61	867.15	166.45
chr1	225862398	225862924	527	6	63.44	29.72
chr1	225908600	225909220	621	8	83.02	29.72
chr1	225909988	225911319	1332	16	141.71	29.72
chr1	225912386	225913091	706	8	78.28	23.78
chr1	225982489	225983083	595	6	59.96	29.72
chr1	225988690	225990376	1687	93	1323.62	172.39
chr1	226041548	226042619	1072	22	238.22	65.39
chr1	226042648	226043372	725	10	102.06	35.67
chr1	226201496	226202870	1375	35	397.86	77.28
chr1	226260805	226261760	956	37	486.57	136.73
chr1	226261868	226262946	1079	16	156.39	41.61
chr1	226291885	226293127	1243	26	279.53	59.45
chr1	226335661	226338844	3184	155	2102.89	160.5
chr1	226356011	226357848	1838	67	841.91	208.06
chr1	226362840	226364474	1635	71	944.14	130.78
chr1	226393938	226395754	1817	96	1347.72	202.12
chr1	226412242	226412659	418	11	142.69	59.45
chr1	226412797	226413500	704	19	231.82	71.34
chr1	226419405	226419873	469	7	79.89	35.67
chr1	226419952	226420994	1043	34	423.75	107
chr1	226466868	226467621	754	9	87.87	29.72
chr1	226467648	226468432	785	19	222.65	83.22
chr1	226529882	226531248	1367	23	228.17	59.45
chr1	226632603	226633863	1261	38	457.62	77.28
chr1	226659527	226662058	2532	92	1144.45	154.56
chr1	226699691	226700852	1162	27	301.72	71.34
chr1	226710664	226712234	1571	93	1352.28	172.39
chr1	226712438	226713415	978	18	190.36	47.56
chr1	226717990	226718524	535	7	75.53	29.72
chr1	226718671	226719065	395	9	114.23	53.5
chr1	226740624	226742796	2173	130	1884.06	190.23
chr1	226848963	226850044	1082	14	131	29.72
chr1	226850092	226851049	958	13	125.79	35.67
chr1	226937143	226938927	1785	57	671.89	83.22
chr1	227473231	227474910	1680	71	935.81	124.84
chr1	227543520	227546059	2540	109	1428.55	166.45
chr1	227609292	227610047	756	9	87.77	23.78
chr1	227634070	227634908	839	17	188.21	65.39
chr1	227709448	227711412	1965	116	1677.8	202.12
chr1	227759957	227761943	1987	113	1616.98	148.62
chr1	227827184	227829647	2464	163	2425.07	154.56
chr1	228058507	228058857	351	6	71.42	35.67
chr1	228268291	228271388	3098	115	1434.05	118.89
chr1	228476449	228477460	1012	17	174.16	47.56
chr1	228479518	228480091	574	6	60.99	23.78
chr1	228627918	228629184	1267	41	488.44	83.22
chr1	228843997	228846177	2181	123	1752.94	208.06
chr1	229070002	229071638	1637	69	909.45	95.11
chr1	229180222	229182409	2188	122	1732.95	184.28
chr1	229241549	229243183	1635	51	612.97	83.22
chr1	229364047	229365080	1034	14	133.79	35.67
chr1	229365215	229365590	376	6	71.42	35.67
chr1	229442704	229444539	1836	143	2232.35	214.01
chr1	229539238	229541845	2608	219	3100	303.17
chr1	229622388	229625290	2903	112	1415.9	124.84
chr1	229730448	229732129	1682	64	800.65	196.17
chr1	229828682	229830119	1438	74	1037.17	124.84
chr1	230831409	230833447	2039	63	748.44	77.28
chr1	231007443	231008720	1278	79	1168.06	196.17
chr1	231152201	231154107	1907	78	1014.29	166.45
chr1	231497295	231498298	1004	27	318.94	71.34
chr1	231529379	231531663	2285	69	810.4	95.11
chr1	231815849	231817361	1513	30	298.18	53.5
chr1	232107207	232108246	1040	17	172.12	47.56
chr1	232416433	232417222	790	13	136.95	35.67
chr1	232528490	232529088	599	11	124.55	53.5
chr1	232574686	232577319	2634	159	2303.56	261.56
chr1	232679743	232681903	2161	89	1155.97	107
chr1	232801950	232803023	1074	23	252.29	53.5
chr1	232805942	232813811	7870	358	3100	130.78
chr1	232878454	232879029	576	9	98.98	35.67
chr1	233356764	233359027	2264	121	1696.88	202.12
chr1	233390222	233391734	1513	118	1848.37	243.73
chr1	233556183	233560151	3969	242	3100	243.73
[truncated: 20,183 more rows]

## Sheet: HSC_H3K27Me3_peaks
Chr	Start	End	Length	Tags	Pval(-10*LOG10)	Fold enrichment
chr1	848438	850730	2293	60	319.22	12.84
chr1	850939	852291	1353	30	149.48	11.41
chr1	858496	859301	806	15	64.94	12.84
chr1	860118	861568	1451	51	333.38	21.39
chr1	865000	869146	4147	135	807.3	21.39
chr1	892969	893587	619	13	71.05	11.41
chr1	894647	896315	1669	48	276.78	15.69
chr1	896529	897162	634	11	54.03	8.56
chr1	910657	911264	608	12	63.77	8.56
chr1	919846	920375	530	11	61.93	9.98
chr1	921919	926632	4714	153	910.24	17.12
chr1	928185	929296	1112	20	89.09	11.41
chr1	944474	945932	1459	38	208.28	17.12
chr1	946135	947815	1681	34	155.35	11.41
chr1	957215	957899	685	14	73.83	12.84
chr1	959025	960345	1321	33	177.88	14.26
chr1	963343	964446	1104	25	129.39	14.26
chr1	964996	966235	1240	29	151.01	14.26
chr1	984042	984582	541	10	52.94	8.56
chr1	985471	986339	869	18	91.45	14.26
chr1	986541	987834	1294	30	154.62	12.84
chr1	987856	988493	638	12	61.47	11.41
chr1	1004662	1005694	1033	20	94.68	8.56
chr1	1042294	1043160	867	20	108.26	15.69
chr1	1131046	1132405	1360	29	140.73	12.84
chr1	1170950	1173542	2593	60	291.13	14.26
chr1	1277679	1278577	899	18	89.08	11.41
chr1	1278621	1279697	1077	23	115.15	12.84
chr1	1279791	1280437	647	12	60.8	8.56
chr1	1280494	1281263	770	17	91.5	17.12
chr1	1283866	1284666	801	15	72.88	12.84
chr1	1285897	1286431	535	11	61.51	11.41
chr1	1506247	1506891	645	14	77.18	11.41
chr1	1511188	1511833	646	17	103.45	14.26
chr1	1556636	1557408	773	15	67.2	12.84
chr1	1886804	1887744	941	20	101.86	11.41
chr1	1923866	1925668	1803	49	271.33	17.12
chr1	1926227	1926796	570	10	50.84	11.41
chr1	1936214	1936966	753	14	68.62	12.84
chr1	1938663	1939291	629	12	62.14	9.98
chr1	1939518	1940676	1159	30	167.47	15.69
chr1	1940821	1943851	3031	84	457.68	15.69
chr1	1967526	1969592	2067	43	196.51	12.84
chr1	2148915	2150433	1519	43	247.25	19.97
chr1	2355328	2356009	682	12	58.31	9.98
chr1	2363199	2364957	1759	46	249	12.84
chr1	2365489	2366699	1211	36	216.99	21.39
chr1	2366972	2367676	705	17	97.47	12.84
chr1	2367695	2368785	1091	23	105.99	12.84
chr1	2369501	2370441	941	22	118.59	14.26
chr1	2383812	2385805	1994	44	210.41	9.98
chr1	2387460	2389145	1686	36	170.83	11.41
chr1	2449957	2451004	1048	28	160.97	15.69
chr1	2451064	2453433	2370	88	579.48	24.25
chr1	2461492	2462330	839	17	85.78	11.41
chr1	2520282	2520847	566	10	51.12	8.56
chr1	2522382	2522914	533	10	53.54	8.56
chr1	2541367	2542253	887	16	74.45	12.84
chr1	2547430	2550218	2789	105	693.03	24.25
chr1	2550305	2551847	1543	40	217.56	12.84
chr1	2557947	2558515	569	10	50.91	7.13
chr1	2572081	2572813	733	15	78.08	9.98
chr1	2573909	2576493	2585	73	405.66	17.12
chr1	2576716	2577801	1086	25	130.98	14.26
chr1	2578397	2579050	654	14	76.41	14.26
chr1	2604953	2605980	1028	21	102.94	14.26
chr1	2612324	2613046	723	17	95.75	11.41
chr1	2618889	2619688	800	22	132.76	18.54
chr1	2619983	2620835	853	22	127.13	14.26
chr1	2694137	2699785	5649	190	1151.46	31.38
chr1	2701938	2703019	1082	22	106.69	9.98
chr1	2703510	2704485	976	21	107.15	11.41
chr1	2874663	2875789	1127	20	88.09	9.98
chr1	2933491	2934000	510	12	72.32	9.98
chr1	2934508	2936276	1769	44	230.47	17.12
chr1	2975376	2975967	592	13	73.39	12.84
chr1	3153312	3154583	1272	32	173.9	15.69
chr1	3298981	3299559	579	10	50.22	9.98
chr1	3347674	3348159	486	10	57.3	9.98
chr1	3556457	3560265	3809	104	555.9	21.39
chr1	3561628	3562286	659	13	67.81	9.98
chr1	3566490	3567258	769	14	67.48	11.41
chr1	3589580	3590603	1024	25	136.72	18.54
chr1	3614042	3615326	1285	39	236.71	17.12
chr1	3615587	3616097	511	10	55.25	7.13
chr1	3616121	3616663	543	11	60.85	9.98
chr1	3623627	3624221	595	11	56.8	8.56
chr1	3825605	3826303	699	17	98.05	11.41
chr1	3833101	3833825	725	15	78.73	11.41
chr1	3912022	3913172	1151	26	133.65	12.84
chr1	3914079	3915714	1636	38	191.5	11.41
chr1	3917475	3918414	940	17	78.34	11.41
chr1	3929295	3929884	590	11	57.17	8.56
chr1	3942586	3943487	902	18	88.85	12.84
chr1	3960267	3960932	666	13	67.27	9.98
chr1	4008989	4009533	545	10	52.64	9.98
chr1	4028800	4029565	766	17	91.85	12.84
chr1	4031318	4032950	1633	38	191.77	14.26
chr1	4079423	4079982	560	10	51.55	9.98
chr1	4098247	4100885	2639	58	270.82	11.41
chr1	4173394	4174040	647	11	53.16	9.98
chr1	4210512	4211089	578	10	50.29	11.41
chr1	4233641	4234070	430	16	121.38	19.97
chr1	4235205	4236135	931	21	111.01	15.69
chr1	4399229	4399773	545	11	60.68	12.84
chr1	4399827	4400404	578	10	50.29	8.56
chr1	4401357	4401958	602	11	56.29	8.56
chr1	4405043	4406890	1848	47	248.96	15.69
chr1	4406966	4408716	1751	46	249.81	15.69
chr1	4451909	4452458	550	10	52.27	8.56
chr1	4469690	4471591	1902	45	226.68	14.26
chr1	4483493	4484159	667	11	51.85	11.41
chr1	4489187	4490032	846	18	93.34	12.84
chr1	4519657	4521420	1764	41	205.34	11.41
chr1	4523613	4524416	804	19	105.48	17.12
chr1	4525503	4526163	661	12	59.79	9.98
chr1	4527860	4528580	721	13	63.21	9.98
chr1	4544363	4547208	2846	85	487.51	17.12
chr1	4586222	4586805	584	12	65.7	8.56
chr1	4597420	4599096	1677	41	213.27	15.69
chr1	4600047	4600640	594	11	56.87	9.98
chr1	4601227	4601896	670	14	75.06	12.84
chr1	4605461	4606187	727	14	70.55	11.41
chr1	4607718	4609090	1373	26	116.21	11.41
chr1	4609439	4611693	2255	86	575.99	22.82
chr1	4611718	4617599	5882	210	1309.37	21.39
chr1	4617678	4621745	4068	135	817.47	24.25
chr1	4624410	4625151	742	14	69.43	11.41
chr1	4641407	4642105	699	13	64.79	12.84
chr1	4644505	4645126	622	12	62.68	9.98
chr1	4645520	4646182	663	12	59.64	8.56
chr1	4656225	4657221	997	22	113.63	12.84
chr1	4667213	4667954	742	14	69.43	11.41
chr1	4669562	4672093	2532	84	516.59	19.97
chr1	4672427	4673522	1096	20	90.19	9.98
chr1	4674039	4674834	796	20	115.03	14.26
chr1	4680144	4680719	576	11	58.23	9.98
chr1	4681872	4682569	698	13	64.86	11.41
chr1	4689096	4689736	641	15	86.1	14.26
chr1	4689745	4690830	1086	33	203.34	15.69
chr1	4691587	4693492	1906	43	209.62	12.84
chr1	4693776	4695650	1875	47	246.34	17.12
chr1	4697540	4698879	1340	31	158.94	12.84
chr1	4698978	4699538	561	10	51.48	8.56
chr1	4701941	4703474	1534	33	158.94	12.84
chr1	4704262	4704821	560	11	59.47	11.41
chr1	4709448	4710235	788	15	73.84	12.84
chr1	4731440	4731976	537	10	53.24	12.84
chr1	4733022	4734151	1130	26	135.5	11.41
chr1	4762917	4763693	777	15	74.66	12.84
chr1	4854156	4854812	657	11	52.49	8.56
chr1	4923496	4924593	1098	21	97.66	9.98
chr1	4940306	4940862	557	10	51.77	7.13
chr1	4975280	4975829	550	10	52.27	8.56
chr1	4990675	4991272	598	11	56.58	11.41
chr1	5032636	5033170	535	10	53.39	9.98
chr1	5185303	5186622	1320	39	232.56	21.39
chr1	5188508	5189071	564	10	51.27	11.41
chr1	5191264	5191813	550	10	52.27	11.41
chr1	5400934	5401528	595	11	56.8	11.41
chr1	5405522	5409166	3645	102	555.24	17.12
chr1	5409510	5410485	976	21	107.15	8.56
chr1	5413118	5414090	973	18	83.62	11.41
chr1	5417428	5417981	554	12	68.26	14.26
chr1	5417995	5418581	587	13	73.83	9.98
chr1	5428952	5429466	515	10	54.93	8.56
chr1	5432308	5432808	501	11	64.46	9.98
chr1	5436133	5437508	1376	33	172.66	15.69
chr1	5438044	5439162	1119	39	258.28	19.97
chr1	5442872	5444210	1339	28	134.37	12.84
chr1	5444457	5446411	1955	52	282.46	17.12
chr1	5446853	5447404	552	10	52.13	8.56
chr1	5450364	5452086	1723	38	184.02	12.84
chr1	5452712	5454216	1505	31	145.23	11.41
chr1	5457432	5459687	2256	52	253.98	14.26
chr1	5464805	5466117	1313	36	205.5	18.54
chr1	5468300	5468891	592	11	57.02	8.56
chr1	5471649	5472225	577	10	50.36	9.98
chr1	5474024	5474715	692	13	65.3	8.56
chr1	5475844	5477807	1964	44	212.93	12.84
chr1	5478890	5479523	634	12	61.76	8.56
chr1	5480510	5481249	740	15	77.52	12.84
chr1	5564523	5565358	836	16	78.09	15.69
chr1	5585550	5586074	525	10	54.15	12.84
chr1	5593958	5594657	700	15	80.82	12.84
chr1	5595025	5596540	1516	34	168.62	11.41
chr1	5597822	5598747	926	17	79.31	15.69
chr1	5609720	5610687	968	22	116.16	9.98
chr1	5610799	5612189	1391	34	179.86	14.26
chr1	5615105	5615694	590	11	57.17	11.41
chr1	5622520	5623157	638	12	61.47	9.98
chr1	5633555	5634113	559	11	59.55	9.98
chr1	5634255	5636779	2525	78	459.31	18.54
chr1	5637495	5638063	569	10	50.91	11.41
chr1	5652792	5653479	688	15	81.85	9.98
chr1	5653970	5655035	1066	22	107.95	9.98
chr1	5655111	5655881	771	14	67.34	17.12
chr1	5698038	5698643	606	13	72.16	11.41
chr1	5699328	5701027	1700	41	211.13	12.84
chr1	5701410	5701961	552	10	52.13	8.56
chr1	5710610	5711204	595	11	56.8	9.98
chr1	5712532	5713124	593	11	56.95	9.98
chr1	5716752	5717420	669	11	51.72	8.56
chr1	5722129	5722773	645	14	77.18	11.41
chr1	5727208	5728415	1208	24	112.83	11.41
chr1	5742463	5743066	604	11	56.14	9.98
chr1	5746109	5746887	779	14	66.78	14.26
chr1	5746902	5748409	1508	48	295.97	19.97
chr1	5773959	5774661	703	12	56.9	9.98
chr1	5779886	5780705	820	14	64.02	12.84
chr1	5794945	5796883	1939	44	215.06	11.41
chr1	5796885	5797509	625	11	54.65	8.56
chr1	5802753	5803483	731	15	78.25	11.41
chr1	5809935	5810753	819	19	104.09	9.98
chr1	5812821	5813523	703	13	64.5	9.98
chr1	5813945	5814944	1000	21	105.17	14.26
chr1	5816344	5817022	679	11	51.08	9.98
chr1	5837073	5837643	571	10	50.77	11.41
chr1	6158537	6162044	3508	121	743.36	22.82
chr1	6162441	6164212	1772	45	238.89	12.84
chr1	6187684	6191048	3365	104	605.73	18.54
chr1	6191195	6191774	580	10	50.15	8.56
chr1	6221467	6227395	5929	221	1424.97	25.67
chr1	6227807	6229812	2006	46	225.85	14.26
chr1	6230087	6231045	959	24	134.27	15.69
chr1	6231056	6235010	3955	119	677.66	18.54
chr1	6241748	6243044	1297	34	189.11	15.69
chr1	6244152	6244952	801	22	132.65	17.12
chr1	6244963	6245612	650	12	60.58	9.98
chr1	6397212	6397850	639	14	77.71	12.84
chr1	6398579	6400399	1821	47	251.63	15.69
chr1	6400427	6404846	4420	138	802.27	25.67
chr1	6405302	6409086	3785	139	896.54	21.39
chr1	6421733	6422399	667	12	51.85	9.98
chr1	6423512	6424103	592	11	57.02	9.98
chr1	6429023	6431329	2307	74	447.73	19.97
chr1	6431458	6432607	1150	26	133.74	17.12
chr1	6435093	6435703	611	13	71.73	14.26
chr1	6436978	6438638	1661	44	241.18	14.26
chr1	6438678	6439952	1275	32	173.6	12.84
chr1	6441909	6443407	1499	39	213.12	14.26
chr1	6443492	6443914	423	10	63.06	12.84
chr1	6466297	6469593	3297	89	474.74	15.69
chr1	6478904	6480118	1215	25	120.19	12.84
chr1	6768134	6768562	429	11	71.54	14.26
chr1	6946878	6947514	637	11	53.83	7.13
chr1	7052413	7053170	758	13	60.69	12.84
chr1	7066836	7067618	783	18	98.82	11.41
chr1	7078402	7079050	649	16	94.12	11.41
chr1	7230846	7231427	582	10	50.01	9.98
chr1	7255269	7255925	657	13	67.97	11.41
chr1	7256279	7257223	945	18	85.62	11.41
chr1	7279970	7280739	770	15	75.19	9.98
chr1	7281062	7281612	551	12	68.53	8.56
chr1	7282195	7282791	597	11	56.65	9.98
chr1	7362213	7362775	563	10	51.34	9.98
chr1	7685224	7686690	1467	44	262.57	21.39
chr1	7688000	7689709	1710	67	460.72	28.53
chr1	7753878	7754443	566	10	51.12	9.98
chr1	7868316	7869197	882	20	106.91	15.69
chr1	7998050	7999375	1326	36	204.11	14.26
chr1	8000706	8001594	889	20	106.29	9.98
chr1	8006050	8008620	2571	116	847.61	34.23
chr1	8009085	8010845	1761	39	189.02	12.84
chr1	8010853	8011858	1006	24	129.76	12.84
chr1	8046090	8046604	515	10	54.93	9.98
chr1	8103728	8104353	626	13	70.47	11.41
chr1	8104546	8105122	577	11	58.15	8.56
chr1	8116651	8118030	1380	27	123.37	11.41
chr1	8119464	8120033	570	11	58.69	11.41
chr1	8121293	8121899	607	12	55.93	11.41
chr1	8137145	8139972	2828	66	320.52	15.69
chr1	8194942	8196263	1322	29	143.87	11.41
chr1	8199333	8202680	3348	95	523.62	19.97
chr1	8263452	8264207	756	13	60.82	11.41
chr1	8264522	8265209	688	12	57.9	9.98
chr1	8268770	8269250	481	10	57.73	9.98
chr1	8297930	8299125	1196	29	155.07	15.69
chr1	8299787	8300285	499	12	73.39	12.84
chr1	8300343	8300898	556	11	59.79	8.56
chr1	8301861	8302536	676	13	66.5	12.84
chr1	9164092	9166919	2828	65	312.21	17.12
chr1	9180370	9187145	6776	248	1568.08	29.95
chr1	9188783	9189403	621	12	62.75	9.98
chr1	9189778	9190462	685	12	58.11	12.84
chr1	9977540	9978231	692	12	50.27	11.41
chr1	9979028	9980467	1440	40	228.34	15.69
chr1	9980481	9981041	561	11	59.4	9.98
chr1	9981240	9981925	686	15	82.02	11.41
chr1	10193134	10193663	530	10	53.77	11.41
chr1	10619808	10621672	1865	48	256.07	18.54
chr1	10676732	10677313	582	10	50.01	11.41
chr1	10677326	10678010	685	15	82.11	11.41
chr1	10767914	10768516	603	11	56.22	8.56
chr1	10770076	10778413	8338	263	1519.28	22.82
chr1	10779209	10781107	1899	47	244.05	18.54
chr1	10782524	10784131	1608	38	194.01	15.69
chr1	10785416	10785992	577	10	50.36	8.56
chr1	10789905	10790535	631	12	61.99	11.41
chr1	10790834	10793499	2666	70	370.15	15.69
chr1	10816985	10817846	862	17	84	11.41
chr1	10818024	10819328	1305	43	273.09	27.1
chr1	10819468	10820160	693	21	135.77	18.54
chr1	10845139	10849020	3882	112	620.83	22.82
chr1	10849128	10850958	1831	41	199.53	15.69
chr1	10851334	10851911	578	10	50.29	9.98
chr1	10870640	10873983	3344	84	426.11	15.69
chr1	11301499	11302274	776	15	74.73	11.41
chr1	11378338	11379090	753	14	68.62	9.98
chr1	11398562	11399125	564	11	59.16	11.41
chr1	11423202	11423694	493	10	56.71	8.56
chr1	11424805	11425378	574	10	50.56	9.98
chr1	11426824	11427481	658	11	52.43	9.98
chr1	11436538	11438123	1586	31	139.13	11.41
chr1	11443371	11444279	909	20	104.55	11.41
chr1	11444418	11445121	704	13	64.43	14.26
chr1	11458431	11459317	887	21	115	11.41
chr1	11459961	11461097	1137	24	118.37	11.41
chr1	11462832	11465503	2672	66	334.69	14.26
chr1	11467607	11468391	785	15	74.06	11.41
chr1	11481185	11482057	873	20	107.72	9.98
chr1	11482366	11483459	1094	29	156.24	14.26
chr1	11484148	11484940	793	17	89.53	11.41
chr1	11536298	11538264	1967	52	281.23	12.84
chr1	11540031	11540701	671	13	66.88	12.84
chr1	11541636	11542271	636	12	61.61	11.41
chr1	11566045	11567102	1058	22	108.58	11.41
chr1	11567685	11568379	695	15	81.24	9.98
chr1	11569402	11570312	911	22	121.4	12.84
chr1	11573951	11574439	489	10	57.05	9.98
chr1	11576808	11578021	1214	33	188.77	18.54
chr1	11579079	11579572	494	10	56.63	11.41
chr1	11631286	11634173	2888	72	365.93	18.54
chr1	11672159	11678015	5857	176	991.09	18.54
chr1	11680713	11681773	1061	21	100.4	8.56
chr1	11682770	11684270	1501	45	268.02	19.97
chr1	11684299	11685330	1032	26	144.71	12.84
chr1	11686215	11686820	606	14	80.69	9.98
chr1	11687900	11688471	572	10	50.7	8.56
chr1	11839163	11839822	660	13	59.86	11.41
chr1	11839973	11840968	996	31	195.12	18.54
chr1	11840983	11842383	1401	36	196.38	15.69
chr1	11844428	11845053	626	14	78.86	12.84
chr1	11879836	11880560	725	19	113.32	18.54
chr1	11881099	11882590	1492	47	288.27	18.54
chr1	12045566	12047204	1639	40	208.23	15.69
chr1	12047221	12047718	498	10	56.3	8.56
chr1	12522420	12523177	758	20	118.94	17.12
chr1	12597903	12598418	516	10	54.85	7.13
chr1	12598772	12600085	1314	33	178.56	12.84
chr1	12645548	12646071	524	11	62.44	9.98
chr1	12739397	12739835	439	10	61.51	11.41
chr1	12741318	12741889	572	10	50.7	9.98
chr1	12742615	12743193	579	10	50.22	8.56
chr1	13109301	13110016	716	12	56.04	12.84
chr1	13662250	13662828	579	11	58	9.98
chr1	13709259	13714471	5213	157	887.81	28.53
chr1	13715790	13717241	1452	43	254.88	15.69
chr1	13718956	13719515	560	10	51.55	9.98
chr1	13755173	13756516	1344	33	175.67	12.84
chr1	13770003	13770651	649	13	68.6	11.41
chr1	13776752	13777325	574	11	58.38	9.98
chr1	13778972	13779594	623	11	54.79	8.56
chr1	13779754	13785802	6049	226	1458.76	27.1
chr1	13786514	13787238	725	13	62.93	8.56
chr1	13788214	13789001	788	18	98.36	11.41
chr1	13789009	13789587	579	10	50.22	7.13
chr1	13794406	13794987	582	10	50.01	9.98
chr1	13804081	13804630	550	11	60.27	9.98
chr1	14035489	14036086	598	11	56.58	9.98
chr1	14043602	14044692	1091	25	130.54	9.98
chr1	14060818	14061439	622	12	62.68	8.56
chr1	14080840	14081750	911	20	104.38	9.98
chr1	14082637	14083343	707	15	80.22	12.84
chr1	14085380	14090391	5012	181	1148.61	29.95
chr1	14090448	14095307	4860	210	1478.89	25.67
chr1	14095607	14096197	591	11	57.1	8.56
chr1	14096309	14097149	841	13	55.54	12.84
chr1	14097598	14098063	466	10	59.03	9.98
chr1	14101320	14101970	651	11	52.89	9.98
chr1	14104066	14104670	605	13	72.25	12.84
chr1	14126643	14127216	574	11	58.38	9.98
chr1	14129278	14130314	1037	20	94.38	9.98
chr1	14162934	14163976	1043	28	161.5	15.69
chr1	14165154	14166082	929	20	102.86	11.41
chr1	14189788	14190306	519	10	54.62	11.41
chr1	14190487	14191060	574	10	50.56	9.98
chr1	14214719	14215298	580	12	66.04	11.41
chr1	14219208	14219851	644	12	61.02	8.56
chr1	14226890	14227465	576	10	50.42	8.56
chr1	14244579	14245257	679	11	51.08	9.98
chr1	14269924	14270810	887	20	106.47	12.84
chr1	14284569	14285190	622	13	70.8	12.84
chr1	14294800	14295375	576	10	50.42	11.41
chr1	14308107	14308748	642	13	69.16	9.98
chr1	14309427	14309950	524	11	62.44	8.56
chr1	14312967	14313469	503	10	55.89	9.98
chr1	14316952	14319156	2205	52	258.49	12.84
chr1	14334983	14335695	713	14	71.61	11.41
chr1	14372873	14373535	663	12	59.64	9.98
chr1	14374934	14375471	538	10	53.16	11.41
chr1	14378133	14380841	2709	67	339.8	14.26
chr1	14382763	14383386	624	13	70.64	11.41
chr1	14386104	14386870	767	16	83.47	8.56
chr1	14387591	14388039	449	10	60.57	9.98
chr1	14402620	14403150	531	11	61.84	11.41
chr1	14430960	14431635	676	12	58.73	8.56
chr1	14434474	14435330	857	15	61.66	11.41
chr1	14460605	14461132	528	10	53.92	8.56
chr1	14461700	14462360	661	12	59.79	9.98
chr1	14470746	14471325	580	10	50.15	7.13
chr1	14481468	14482450	983	21	106.57	11.41
chr1	14482559	14483545	987	17	75.19	12.84
chr1	14503374	14503912	539	10	53.09	11.41
chr1	14515982	14516568	587	11	57.4	11.41
chr1	14591328	14591902	575	10	50.49	9.98
chr1	14593560	14594079	520	10	54.54	7.13
chr1	14598454	14599050	597	12	64.64	9.98
chr1	14610898	14611459	562	10	51.41	8.56
chr1	14617306	14617862	557	10	51.77	11.41
chr1	14617864	14618425	562	10	51.41	9.98
chr1	14637583	14638133	551	10	52.2	9.98
chr1	14669536	14670198	663	12	59.64	8.56
chr1	14696442	14697012	571	11	58.61	11.41
chr1	14700507	14701114	608	11	55.85	9.98
chr1	14737937	14738879	943	18	85.77	14.26
chr1	14739095	14739994	900	20	105.33	11.41
chr1	14740309	14740948	640	13	69.32	11.41
chr1	14742121	14742695	575	10	50.49	8.56
chr1	14745077	14745811	735	19	112.28	12.84
chr1	14754675	14755194	520	11	62.78	9.98
chr1	14758079	14758847	769	15	75.26	11.41
chr1	14776566	14777131	566	10	51.12	9.98
chr1	14784116	14784677	562	10	51.41	8.56
chr1	14788373	14789842	1470	32	147.99	9.98
chr1	14790613	14793991	3379	110	661.79	17.12
chr1	14795247	14803580	8334	324	2131.97	27.1
chr1	14804995	14806079	1085	22	106.46	11.41
chr1	14815547	14816214	668	16	92.26	11.41
chr1	14816570	14817143	574	11	58.38	11.41
chr1	14817204	14817842	639	12	61.39	9.98
chr1	14834058	14834694	637	12	53.83	9.98
chr1	14888570	14889388	819	13	56.84	9.98
chr1	14889540	14890200	661	12	59.79	11.41
chr1	14892199	14892750	552	11	52.13	12.84
chr1	14893462	14894370	909	26	157.79	21.39
chr1	14894717	14895465	749	12	53.96	11.41
chr1	14896755	14897373	619	14	79.5	11.41
chr1	14898067	14898654	588	14	82.4	12.84
chr1	14898675	14899234	560	10	51.55	7.13
chr1	14923943	14924543	601	12	64.32	9.98
chr1	15012218	15012785	568	11	58.85	8.56
chr1	15052910	15053456	547	11	60.52	9.98
chr1	15072723	15073315	593	11	56.95	8.56
chr1	15074823	15075757	935	17	78.68	14.26
chr1	15123793	15127191	3399	129	850.51	28.53
chr1	15128397	15129224	828	16	78.69	9.98
chr1	15350968	15351633	666	14	75.39	11.41
chr1	15352857	15354034	1178	33	192.69	18.54
chr1	15883217	15883849	633	17	104.86	17.12
chr1	15954181	15959176	4996	159	932.9	19.97
chr1	15959490	15961338	1849	46	240.15	17.12
chr1	16226965	16227581	617	12	63.06	9.98
chr1	16271645	16272793	1149	26	133.82	11.41
chr1	16272985	16273797	813	14	64.48	9.98
chr1	16300689	16301388	700	14	72.63	11.41
chr1	16306140	16306728	589	11	57.25	9.98
chr1	16352564	16353375	812	15	72.09	12.84
chr1	16353729	16354604	876	24	142.89	22.82
chr1	16355150	16355725	576	10	50.42	8.56
chr1	16360444	16361569	1126	21	95.66	11.41
chr1	16368155	16368769	615	11	55.36	9.98
chr1	16424914	16428210	3297	104	614.02	29.95
chr1	16732825	16733550	726	12	55.4	12.84
chr1	16810583	16811472	890	18	89.78	17.12
chr1	16811474	16812137	664	14	67.42	9.98
chr1	16846619	16847150	532	10	53.62	11.41
chr1	16847437	16848261	825	19	103.54	17.12
chr1	16849199	16849796	598	11	56.58	8.56
chr1	16889990	16893806	3817	162	1134.61	35.66
chr1	16894711	16895246	536	13	78.64	12.84
chr1	16895335	16901999	6665	233	1442.16	31.38
chr1	16902152	16902940	789	15	73.76	14.26
chr1	16905631	16907487	1857	46	239.39	14.26
chr1	16907554	16908481	928	22	119.8	11.41
chr1	16925877	16926473	597	11	56.65	9.98
chr1	16956873	16957441	569	10	50.91	9.98
chr1	16958219	16958817	599	11	56.51	11.41
chr1	16971480	16972135	656	17	102.4	11.41
chr1	17072558	17073104	547	12	68.88	14.26
chr1	17179505	17180072	568	10	50.98	7.13
chr1	17316790	17318475	1686	46	256.57	18.54
chr1	17346129	17346624	496	11	64.91	12.84
chr1	17348353	17349310	958	26	152.35	14.26
chr1	17669221	17669760	540	11	61.09	12.84
chr1	17715968	17716488	521	13	80.15	12.84
chr1	17719217	17720365	1149	24	117.41	9.98
chr1	17720554	17721182	629	13	62.14	9.98
chr1	17721184	17721968	785	19	107.28	12.84
chr1	17725140	17725800	661	12	59.79	8.56
chr1	17736932	17740560	3629	133	857.73	25.67
chr1	17741485	17742229	745	19	111.25	15.69
chr1	17801504	17802345	842	14	62.6	12.84
chr1	17942907	17943496	590	11	57.17	9.98
chr1	17991869	17992498	630	12	62.07	11.41
chr1	17992517	17993465	949	22	117.87	11.41
chr1	17994696	17995262	567	10	51.05	9.98
chr1	17995802	17996379	578	10	50.29	11.41
chr1	17998627	17999506	880	18	90.57	12.84
chr1	18009409	18010493	1085	21	98.61	14.26
chr1	18017886	18018847	962	20	100.15	8.56
chr1	18026760	18027369	610	11	55.71	9.98
chr1	18034500	18035082	583	11	57.7	8.56
chr1	18035163	18035733	571	12	66.79	9.98
chr1	18042190	18043132	943	19	93.63	15.69
chr1	18044004	18044629	626	11	54.58	11.41
chr1	18075726	18076437	712	15	79.81	12.84
chr1	18086581	18087739	1159	26	132.95	14.26
chr1	18089749	18091244	1496	34	170.35	12.84
chr1	18108027	18109982	1956	51	273.46	14.26
chr1	18113703	18114627	925	24	137.69	21.39
chr1	18115297	18116194	898	19	97.23	11.41
chr1	18123841	18124458	618	11	55.14	9.98
chr1	18124594	18125754	1161	27	141.18	11.41
chr1	18137015	18137632	618	12	55.14	9.98
chr1	18152074	18152614	541	10	52.94	8.56
chr1	18168376	18169177	802	15	72.81	11.41
chr1	18184562	18185302	741	14	69.5	11.41
chr1	18206715	18207701	987	22	114.49	9.98
chr1	18218472	18219110	639	12	61.39	9.98
chr1	18220948	18221576	629	13	62.14	12.84
chr1	18227028	18227585	558	10	51.69	9.98
chr1	18230545	18231258	714	15	79.64	11.41
chr1	18231544	18232085	542	10	52.86	8.56
chr1	18237696	18238600	905	19	96.65	9.98
chr1	18264753	18265654	902	17	81.02	11.41
chr1	18286090	18287425	1336	28	134.61	14.26
chr1	18289599	18292875	3277	84	432.57	14.26
chr1	18292970	18293837	868	16	75.77	12.84
chr1	18294016	18294681	666	12	59.43	9.98
chr1	18297477	18298384	908	22	121.68	15.69
chr1	18300869	18301496	628	11	54.45	8.56
chr1	18302483	18312474	9992	376	2421.69	25.67
chr1	18315298	18315954	657	12	60.07	8.56
chr1	18316071	18316980	910	17	80.45	12.84
chr1	18318144	18319853	1710	42	218.78	12.84
chr1	18320108	18320624	517	10	54.77	8.56
chr1	18320650	18321246	597	11	56.65	11.41
chr1	18329188	18330489	1302	33	179.74	15.69
chr1	18330894	18331912	1019	22	111.77	11.41
chr1	18375838	18378642	2805	73	382.7	17.12
chr1	18384007	18384558	552	11	52.13	11.41
chr1	18384794	18385368	575	10	50.49	7.13
chr1	18389165	18389660	496	10	56.47	11.41
chr1	18392879	18393660	782	18	98.91	14.26
chr1	18394480	18397713	3234	93	517.83	19.97
chr1	18397962	18401251	3290	97	548.59	18.54
chr1	18426543	18427186	644	12	61.02	9.98
chr1	18427384	18428631	1248	28	141.9	11.41
chr1	18428870	18430866	1997	48	243.48	12.84
chr1	18435859	18436463	605	11	56.07	9.98
chr1	18438502	18439081	580	14	83.18	11.41
chr1	18461572	18462335	764	16	83.72	9.98
chr1	18475401	18476016	616	13	71.31	12.84
chr1	18480875	18481847	973	18	83.62	14.26
chr1	18482130	18482696	567	10	51.05	7.13
chr1	18483084	18485675	2592	65	333.65	14.26
chr1	18488677	18490487	1811	44	226.51	11.41
chr1	18492830	18495065	2236	60	325.03	14.26
chr1	18495424	18496075	652	13	68.36	8.56
chr1	18496275	18498869	2595	72	395.45	18.54
chr1	18526232	18526863	632	12	61.92	11.41
chr1	18530676	18531266	591	13	73.48	9.98
chr1	18539420	18539991	572	10	50.7	9.98
chr1	18550269	18553121	2853	73	377.97	14.26
chr1	18565522	18566210	689	14	73.51	11.41
chr1	18577625	18578250	626	12	62.37	9.98
chr1	18583788	18586182	2395	58	292.04	15.69
chr1	18586210	18586966	757	19	110.03	14.26
chr1	18595926	18596964	1039	20	94.24	9.98
chr1	18596976	18597721	746	15	77.05	9.98
chr1	18601211	18601866	656	13	68.05	9.98
chr1	18601923	18602872	950	22	117.77	12.84
chr1	18603403	18604005	603	11	56.22	8.56
chr1	18606051	18607004	954	21	109.01	14.26
chr1	18639553	18640698	1146	29	159.9	14.26
chr1	18647569	18648154	586	12	65.54	11.41
chr1	18653730	18654313	584	12	65.7	11.41
chr1	18670212	18671082	871	17	83.31	12.84
chr1	18735759	18736353	595	11	56.8	8.56
chr1	18737686	18738417	732	13	62.45	11.41
chr1	18740720	18745178	4459	136	778.6	18.54
chr1	18746375	18747212	838	21	119.72	12.84
chr1	18756198	18758448	2251	82	535.19	22.82
chr1	18758649	18759482	834	22	129.1	15.69
chr1	18759947	18760770	824	23	139.38	18.54
chr1	18760914	18761478	565	10	51.19	8.56
chr1	18786849	18787465	617	15	88.41	15.69
chr1	18791376	18792648	1273	30	156.51	14.26
chr1	18792668	18793237	570	10	50.84	11.41
chr1	18797278	18798580	1303	30	153.82	12.84
chr1	18798607	18799723	1117	22	104.02	9.98
chr1	18801730	18802965	1236	28	142.95	11.41
chr1	18807458	18808440	983	18	82.92	14.26
chr1	18810326	18811571	1246	29	150.47	17.12
chr1	18812909	18814090	1182	33	192.25	21.39
chr1	18817780	18818556	777	15	74.66	9.98
chr1	18820585	18821281	697	15	81.07	12.84
chr1	18823044	18825650	2607	94	606.55	22.82
chr1	18825737	18826353	617	18	116.09	15.69
chr1	18826542	18829739	3198	112	705.64	24.25
chr1	18829948	18830517	570	12	66.88	9.98
chr1	18830652	18839033	8382	308	1959.19	22.82
chr1	18839184	18855764	16581	640	3100	29.95
chr1	18856041	18856885	845	21	119.02	11.41
chr1	18857254	18859080	1827	54	314.76	21.39
chr1	18859559	18860071	513	10	55.09	8.56
chr1	18860144	18861650	1507	31	145.07	12.84
chr1	18862596	18863376	781	12	52.04	12.84
chr1	18863435	18864506	1072	28	158.47	17.12
chr1	18866353	18866953	601	11	56.36	8.56
chr1	18868341	18868909	569	13	75.47	11.41
chr1	18871810	18872600	791	17	89.7	11.41
chr1	18872962	18877067	4106	136	822.34	19.97
chr1	18883120	18883987	868	16	75.77	12.84
chr1	18884002	18885371	1370	36	199.52	14.26
chr1	18886561	18887105	545	10	52.64	8.56
chr1	18888407	18889006	600	11	56.43	11.41
chr1	18890335	18891062	728	14	70.47	11.41
chr1	18891504	18892121	618	14	79.59	15.69
chr1	18892128	18893315	1188	34	200.85	18.54
chr1	18893517	18894287	771	24	155.22	14.26
chr1	18894307	18895137	831	21	120.42	14.26
chr1	18896330	18897401	1072	29	158.47	19.97
chr1	18897459	18898163	705	14	72.24	9.98
chr1	18898192	18898638	447	10	60.76	12.84
chr1	18900595	18901152	558	10	51.69	8.56
chr1	18901370	18903469	2100	65	386.62	18.54
chr1	18903785	18904973	1189	35	210.11	18.54
chr1	18907772	18908364	593	11	56.95	9.98
chr1	18908539	18909739	1201	31	172.12	14.26
chr1	18912107	18912918	812	19	104.73	15.69
chr1	18913054	18913648	595	13	73.12	11.41
chr1	18913969	18916119	2151	75	478.24	19.97
chr1	18916242	18920305	4064	125	721.44	19.97
chr1	18920639	18923849	3211	91	501.99	17.12
chr1	18923883	18925062	1180	28	147.97	15.69
chr1	18925581	18926781	1201	30	163.29	14.26
chr1	18928739	18929841	1103	25	129.48	14.26
chr1	18931264	18931889	626	12	62.37	9.98
chr1	18932192	18932798	607	11	55.93	8.56
chr1	18933220	18933826	607	12	55.93	9.98
chr1	18936262	18936857	596	11	56.73	8.56
chr1	18941650	18942831	1182	26	130.98	11.41
chr1	18942874	18943467	594	11	56.87	8.56
chr1	18949507	18950502	996	23	122.12	11.41
chr1	18954078	18954577	500	15	101.35	15.69
chr1	18963087	18963646	560	10	51.55	9.98
chr1	18968552	18969607	1056	22	108.74	12.84
chr1	18971201	18972333	1133	26	135.23	11.41
chr1	18972945	18973955	1011	26	146.81	19.97
chr1	18974433	18975133	701	14	72.55	11.41
chr1	18975809	18976955	1147	25	125.7	9.98
chr1	18981681	18982286	606	11	56	8.56
chr1	18982607	18983433	827	21	120.82	14.26
chr1	18983846	18984815	970	20	99.51	11.41
chr1	18986845	18987419	575	11	58.31	11.41
chr1	18988170	18988642	473	10	58.42	11.41
chr1	18988646	18989236	591	11	57.1	8.56
chr1	19001674	19002598	925	19	95.04	11.41
chr1	19003215	19003796	582	10	50.01	7.13
chr1	19004512	19005463	952	22	117.59	14.26
chr1	19007422	19007948	527	10	54	8.56
chr1	19009524	19010094	571	11	58.61	11.41
chr1	19010142	19010726	585	12	65.62	11.41
chr1	19011068	19011629	562	10	51.41	8.56
chr1	19013940	19014818	879	21	115.75	15.69
chr1	19016228	19020265	4038	114	622.02	19.97
chr1	19027289	19027804	516	10	54.85	9.98
chr1	19032807	19033290	484	11	66.02	9.98
chr1	19033576	19034541	966	21	107.99	19.97
chr1	19051120	19051769	650	12	60.58	9.98
chr1	19052260	19052834	575	10	50.49	7.13
chr1	19053265	19054058	794	14	65.75	9.98
chr1	19064333	19064962	630	13	70.14	12.84
chr1	19064993	19065690	698	14	72.79	11.41
chr1	19065702	19066278	577	11	58.15	9.98
chr1	19066920	19067442	523	10	54.31	11.41
chr1	19183539	19184147	609	11	55.78	9.98
chr1	19203577	19204239	663	12	59.64	14.26
chr1	19222401	19222969	569	12	66.96	9.98
chr1	19227145	19229479	2335	55	272.09	11.41
chr1	19237408	19238533	1126	27	144.39	15.69
chr1	19239927	19240394	468	11	67.55	11.41
chr1	19240724	19241441	718	14	71.23	9.98
chr1	19241504	19242545	1042	22	109.87	14.26
chr1	19252438	19254868	2431	66	358.59	18.54
chr1	19254914	19256008	1095	25	130.18	11.41
chr1	19256328	19256949	622	22	155.32	19.97
chr1	19473166	19474404	1239	31	168.35	14.26
chr1	19859703	19860280	578	10	50.29	8.56
chr1	19862008	19862777	770	18	100.01	9.98
chr1	19862962	19866278	3317	102	592.48	21.39
chr1	19870401	19870935	535	11	61.51	11.41
chr1	20023911	20024495	585	11	57.55	9.98
chr1	20066051	20066646	596	11	56.73	8.56
chr1	20067932	20068485	554	12	68.26	11.41
chr1	20163410	20164032	623	12	62.6	11.41
chr1	20170726	20171300	575	11	58.31	8.56
chr1	20180219	20180857	639	12	61.39	9.98
chr1	20187267	20188527	1261	41	259.11	18.54
chr1	20188569	20189157	589	11	57.25	11.41
chr1	20199584	20200187	604	11	56.14	8.56
chr1	20214284	20214854	571	10	50.77	8.56
chr1	20230654	20231455	802	17	88.78	12.84
chr1	20238006	20239637	1632	41	217.57	14.26
chr1	20254155	20255339	1185	29	156.11	19.97
chr1	20289107	20289795	689	13	65.52	12.84
chr1	20319672	20321149	1478	37	197.59	17.12
chr1	20362960	20363482	523	10	54.31	9.98
chr1	20376170	20376780	611	11	55.64	8.56
chr1	20381302	20381864	563	11	59.24	11.41
chr1	20382589	20389074	6486	205	1190.86	22.82
chr1	20391396	20392148	753	16	76.5	11.41
chr1	20393320	20394178	859	20	108.99	17.12
chr1	20396821	20397349	529	10	53.84	9.98
chr1	20397413	20399381	1969	52	281.02	15.69
chr1	20399523	20400315	793	16	81.38	9.98
chr1	20400647	20401204	558	16	103.97	11.41
chr1	20401764	20402285	522	10	54.38	11.41
chr1	20410628	20411206	579	10	50.22	8.56
chr1	20411825	20413896	2072	55	297.23	15.69
chr1	20413938	20414582	645	14	77.18	11.41
chr1	20415037	20415941	905	23	130.78	14.26
chr1	20417765	20418328	564	10	51.27	11.41
chr1	20420610	20421813	1204	22	97.79	11.41
chr1	20422363	20422932	570	11	58.69	9.98
chr1	20422946	20423948	1003	26	147.63	11.41
chr1	20423976	20425484	1509	42	239.15	17.12
chr1	20425558	20426622	1065	34	215.65	14.26
chr1	20426966	20427466	501	11	64.46	8.56
chr1	20427874	20428594	721	12	55.72	11.41
chr1	20432011	20436004	3994	114	626.83	17.12
chr1	20436153	20437200	1048	26	143.14	14.26
chr1	20439665	20441356	1692	40	203.35	15.69
chr1	20441487	20442156	670	13	66.96	9.98
chr1	20442210	20442972	763	16	83.8	11.41
chr1	20443293	20444909	1617	39	201.71	14.26
chr1	20451199	20451919	721	13	63.21	9.98
chr1	20454743	20455564	822	14	63.89	11.41
chr1	20455639	20456387	749	16	84.97	12.84
chr1	20456526	20457397	872	20	107.81	14.26
chr1	20459224	20459819	596	13	73.03	9.98
chr1	20468579	20469266	688	15	81.85	11.41
chr1	20470735	20471327	593	11	56.95	8.56
chr1	20471516	20472609	1094	27	147.43	12.84
chr1	20480981	20481599	619	11	55.07	8.56
chr1	20481601	20482067	467	15	105.63	17.12
chr1	20482394	20483424	1031	25	136.05	14.26
chr1	20483801	20484309	509	10	55.41	9.98
chr1	20484779	20486616	1838	49	267.68	18.54
chr1	20486826	20493220	6395	205	1202.12	19.97
chr1	20508528	20509060	533	11	61.67	11.41
chr1	20512882	20513432	551	11	60.19	11.41
chr1	20519027	20519565	539	10	53.09	8.56
chr1	20519605	20520177	573	13	75.1	11.41
chr1	20520498	20522008	1511	42	238.93	17.12
chr1	20522157	20522734	578	12	66.2	9.98
chr1	20526428	20528421	1994	49	252.31	15.69
chr1	20528692	20529334	643	11	53.42	9.98
chr1	20529971	20530553	583	12	65.79	9.98
chr1	20533795	20534392	598	11	56.58	11.41
chr1	20535646	20536252	607	12	55.93	11.41
chr1	20536477	20537076	600	11	56.43	8.56
chr1	20540829	20541439	611	11	55.64	9.98
chr1	20541520	20542537	1018	36	242.03	19.97
chr1	20542777	20546671	3895	112	619.39	19.97
chr1	20547849	20548499	651	12	60.51	11.41
chr1	20556193	20556770	578	11	58.08	8.56
chr1	20558882	20559457	576	10	50.42	9.98
chr1	20559599	20560355	757	17	92.65	14.26
chr1	20560643	20562088	1446	43	255.58	18.54
chr1	20563376	20566980	3605	122	740.34	25.67
chr1	20567262	20568183	922	21	111.81	11.41
chr1	20568240	20569253	1014	24	129.01	14.26
chr1	20569563	20570131	569	10	50.91	11.41
chr1	20570926	20571860	935	22	119.15	14.26
chr1	20572145	20572837	693	13	65.23	9.98
chr1	20572840	20573333	494	11	65.09	12.84
chr1	20574648	20575259	612	13	71.65	11.41
chr1	20579055	20579686	632	13	69.97	11.41
chr1	20582210	20583786	1577	33	155.49	15.69
chr1	20583865	20588623	4759	138	762.78	17.12
chr1	20596916	20597812	897	22	122.74	15.69
chr1	20598337	20598895	559	10	51.62	11.41
chr1	20601494	20602775	1282	36	208.88	15.69
chr1	20603235	20606261	3027	92	532.24	17.12
chr1	20629335	20630069	735	18	103.35	11.41
chr1	20631820	20632387	568	10	50.98	9.98
chr1	20634439	20635398	960	19	92.32	14.26
chr1	20635708	20636427	720	12	55.78	11.41
chr1	20639640	20640247	608	11	55.85	7.13
chr1	20646220	20646747	528	13	79.44	15.69
chr1	20647006	20648037	1032	24	127.36	18.54
chr1	20648559	20649525	967	22	116.25	15.69
chr1	20651394	20652041	648	14	76.92	9.98
chr1	20658414	20658919	506	10	55.65	8.56
chr1	20660994	20661633	640	13	69.32	11.41
chr1	20663618	20665157	1540	33	158.45	12.84
chr1	20667118	20667782	665	13	67.34	8.56
chr1	20671571	20674571	3001	79	416.02	15.69
chr1	20674611	20676742	2132	71	440.91	21.39
chr1	20677201	20678085	885	18	90.18	11.41
chr1	20678920	20684988	6069	247	1676.05	25.67
chr1	20685107	20689338	4232	122	674.03	22.82
chr1	20689871	20691137	1267	28	140.28	12.84
chr1	20691422	20692027	606	11	56	8.56
chr1	20692447	20693051	605	14	80.79	12.84
chr1	20726137	20726693	557	11	59.71	11.41
chr1	20739020	20739805	786	16	81.93	9.98
chr1	20744632	20745363	732	15	70.17	9.98
chr1	20749954	20755335	5382	174	1029.49	24.25
chr1	20755624	20756456	833	13	56.01	11.41
chr1	20789132	20789909	778	12	52.22	11.41
chr1	20914369	20915136	768	16	83.39	15.69
chr1	20915335	20916917	1583	48	286.76	19.97
chr1	20917743	20918324	582	10	50.01	9.98
chr1	20928603	20931921	3319	103	601.76	22.82
chr1	21542471	21544260	1790	41	203.05	12.84
chr1	21545298	21546342	1045	33	208.42	14.26
chr1	21579910	21580710	801	15	72.88	12.84
chr1	21582671	21583670	1000	21	105.17	9.98
chr1	21626612	21627141	530	12	70.43	14.26
chr1	21692082	21692645	564	10	51.27	8.56
chr1	21706990	21711238	4249	116	617.64	18.54
chr1	21735166	21736106	941	20	101.86	12.84
chr1	21736273	21738445	2173	57	304.74	17.12
chr1	21738868	21739771	904	22	122.06	12.84
chr1	21771317	21771862	546	10	52.57	8.56
chr1	21821493	21822365	873	22	125.1	12.84
chr1	21832958	21833571	614	12	55.43	14.26
chr1	21848944	21851044	2101	80	536.8	28.53
chr1	21851195	21852245	1051	28	160.66	15.69
chr1	21858571	21859438	868	23	134.6	12.84
chr1	21869240	21869746	507	10	55.57	9.98
chr1	22339235	22341792	2558	66	345.67	14.26
chr1	22341824	22344653	2830	102	646.01	21.39
chr1	22380662	22381612	951	21	109.27	11.41
chr1	22382389	22383117	729	13	62.66	9.98
chr1	22383236	22383767	532	10	53.62	9.98
chr1	22389802	22390890	1089	23	114.16	9.98
chr1	22396014	22396956	943	19	93.63	12.84
chr1	22398813	22400021	1209	31	171.32	21.39
chr1	22402703	22403531	829	18	94.77	11.41
chr1	22405946	22410166	4221	132	769.16	21.39
chr1	22410172	22410740	569	13	75.47	15.69
chr1	22410962	22412688	1727	46	252.27	18.54
chr1	22413171	22413767	597	12	64.64	15.69
chr1	22415334	22415952	619	12	62.91	11.41
chr1	22432342	22434382	2041	43	198.55	12.84
chr1	22434732	22435888	1157	21	93.51	8.56
chr1	22475106	22475775	670	14	75.06	11.41
chr1	22481286	22482241	956	19	92.63	11.41
chr1	22487532	22487921	390	11	74.78	15.69
chr1	22488662	22489644	983	20	98.48	9.98
chr1	22492918	22493508	591	11	57.1	9.98
chr1	22494329	22495253	925	22	120.08	12.84
chr1	22495852	22496629	778	15	74.58	11.41
chr1	22496805	22497791	987	29	177.03	22.82
chr1	22498567	22499067	501	10	56.06	12.84
chr1	22503618	22506687	3070	87	480.8	24.25
chr1	22506835	22507383	549	11	60.36	9.98
chr1	22507588	22508179	592	14	82.02	9.98
chr1	22517102	22518542	1441	33	166.8	9.98
chr1	22539769	22540363	595	13	73.12	9.98
chr1	22541416	22542349	934	17	78.75	12.84
chr1	22544489	22545125	637	13	61.54	9.98
chr1	22546582	22548210	1629	40	209.18	15.69
chr1	22548218	22553496	5279	207	1377.8	27.1
chr1	22555624	22556256	633	17	104.86	17.12
chr1	22557465	22558128	664	12	59.57	11.41
chr1	22558169	22558796	628	14	70.3	12.84
chr1	22565111	22566297	1187	27	138.87	12.84
chr1	22568366	22569093	728	12	55.27	12.84
chr1	22572514	22573099	586	11	57.47	11.41
chr1	22578750	22579897	1148	25	125.62	14.26
chr1	22581286	22583427	2142	56	299.01	12.84
chr1	22583468	22584063	596	11	56.73	8.56
chr1	22586528	22587617	1090	24	122.27	12.84
chr1	22592132	22592674	543	16	105.77	14.26
chr1	22593277	22594914	1638	47	270.99	15.69
chr1	22595133	22597354	2222	68	400.52	21.39
chr1	22597594	22600548	2955	73	368.21	14.26
chr1	22602782	22604108	1327	34	186.08	14.26
chr1	22607896	22608455	560	10	51.55	8.56
chr1	22618911	22619639	729	15	78.41	9.98
chr1	22641696	22642232	537	10	53.24	11.41
chr1	22746965	22748139	1175	34	202.33	21.39
chr1	22751750	22752306	557	10	51.77	7.13
chr1	22752637	22754040	1404	29	129.35	12.84
chr1	22754233	22757148	2916	84	470.24	17.12
chr1	22758725	22759847	1123	27	144.67	11.41
chr1	22760169	22762776	2608	99	657.93	27.1
chr1	22763199	22764425	1227	46	314.61	25.67
chr1	22764643	22766196	1554	41	225.34	19.97
chr1	22772576	22773114	539	11	61.17	9.98
chr1	22790531	22791883	1353	37	210.32	17.12
chr1	22791898	22792430	533	11	61.67	11.41
chr1	22793632	22794765	1134	24	118.61	9.98
chr1	22801835	22802439	605	11	56.07	8.56
chr1	22802454	22803525	1072	20	91.86	9.98
chr1	22804162	22804982	821	16	79.22	11.41
chr1	22805041	22805860	820	18	95.54	14.26
chr1	22807316	22807873	558	10	51.69	9.98
chr1	22808082	22809040	959	21	108.58	12.84
chr1	22816144	22816694	551	11	60.19	9.98
chr1	22817489	22818755	1267	26	124.08	11.41
chr1	22820699	22821852	1154	25	125.12	14.26
chr1	22823928	22827339	3412	105	609.6	18.54
chr1	22827609	22829468	1860	42	205.3	14.26
chr1	22830748	22831340	593	11	56.95	8.56
chr1	22832751	22833357	607	12	55.93	11.41
chr1	22839926	22840498	573	11	58.46	12.84
chr1	22870245	22870778	534	10	53.46	11.41
chr1	22870915	22871641	727	14	70.55	12.84
chr1	22872341	22873648	1308	38	224.55	17.12
chr1	22908560	22909232	673	12	58.94	9.98
chr1	22909615	22910319	705	16	88.81	12.84
chr1	22910408	22913417	3010	99	591.96	25.67
chr1	22922888	22923391	504	13	81.93	14.26
chr1	22923412	22924005	594	11	56.87	8.56
chr1	23149357	23150255	899	21	113.89	14.26
chr1	23150320	23150802	483	14	93.73	14.26
chr1	23151076	23154809	3734	133	842.72	24.25
chr1	23165060	23165883	824	16	71.24	11.41
chr1	23167024	23169612	2589	63	316.75	14.26
chr1	23366812	23367386	575	10	50.49	9.98
chr1	23414634	23417780	3147	91	509.07	18.54
chr1	23417963	23418993	1031	22	110.78	12.84
chr1	23419321	23420657	1337	28	134.53	12.84
chr1	23622119	23622907	789	14	66.09	11.41
chr1	23623045	23623869	825	18	95.11	14.26
chr1	23623949	23624861	913	30	195.97	22.82
chr1	23624980	23625933	954	21	109.01	11.41
chr1	23682111	23682991	881	22	124.31	12.84
chr1	23684215	23684869	655	12	60.22	12.84
chr1	23754847	23755705	859	17	84.23	9.98
chr1	23760374	23762481	2108	52	267.4	17.12
chr1	23762521	23764448	1928	50	267.43	17.12
chr1	23764573	23765112	540	10	53.01	9.98
chr1	23766681	23769611	2931	96	582.56	25.67
chr1	23817397	23819642	2246	76	475.31	22.82
chr1	23877621	23878118	498	11	64.73	8.56
chr1	24102390	24103297	908	26	157.91	14.26
chr1	24335510	24336075	566	10	51.12	8.56
chr1	24348965	24349596	632	13	69.97	11.41
chr1	24349743	24351092	1350	30	149.74	12.84
chr1	24351645	24352353	709	12	56.5	8.56
chr1	24371402	24371972	571	11	58.61	11.41
chr1	24373660	24374281	622	12	62.68	11.41
chr1	24376587	24377095	509	10	55.41	8.56
chr1	24384434	24387907	3474	104	592.84	18.54
chr1	24391617	24392274	658	12	60	9.98
chr1	24413735	24414758	1024	24	128.09	12.84
chr1	24415828	24416622	795	20	115.13	12.84
chr1	24517146	24520862	3717	128	794.82	21.39
chr1	24522899	24523941	1043	20	93.94	8.56
chr1	24526256	24526978	723	15	78.9	14.26
chr1	24527250	24527820	571	10	50.77	9.98
chr1	24755910	24756506	597	11	56.65	9.98
chr1	25742497	25743036	540	10	53.01	11.41
chr1	25809038	25809605	568	10	50.98	9.98
chr1	25816953	25818318	1366	32	165.06	11.41
chr1	25818556	25819114	559	10	51.62	8.56
chr1	25839535	25840497	963	24	133.87	17.12
chr1	25844226	25845258	1033	22	110.61	9.98
chr1	25847026	25847553	528	10	53.92	9.98
chr1	25850057	25850906	850	14	62.1	11.41
chr1	26233646	26234294	649	12	60.65	9.98
chr1	26242596	26246894	4299	152	955.5	21.39
chr1	26247394	26247985	592	12	65.05	14.26
chr1	26252753	26254540	1788	37	170.74	11.41
chr1	26267093	26267615	523	12	71.08	11.41
chr1	26558010	26558611	602	12	64.24	11.41
chr1	26558650	26561418	2769	85	496.6	31.38
chr1	26601738	26602446	709	12	56.5	9.98
chr1	26602592	26603610	1019	23	120.07	11.41
chr1	26607794	26612905	5112	205	1383.03	24.25
chr1	26613349	26615157	1809	40	193.18	12.84
chr1	27155615	27156110	496	10	56.47	9.98
chr1	27156223	27157130	908	21	113.06	11.41
chr1	27157178	27160346	3169	146	1073.14	31.38
chr1	27161038	27161590	553	10	52.05	11.41
chr1	27190821	27191436	616	11	55.28	9.98
chr1	27191844	27192905	1062	48	363.94	28.53
chr1	27193050	27194668	1619	58	380.78	21.39
chr1	27194711	27196091	1381	27	123.29	12.84
chr1	27210825	27211507	683	15	82.28	12.84
chr1	27517248	27517887	640	13	69.32	9.98
chr1	27899491	27900088	598	11	56.58	8.56
chr1	28867805	28868335	531	11	61.84	9.98
chr1	29009130	29013979	4850	163	990.52	27.1
chr1	29014288	29014819	532	10	53.62	11.41
chr1	29319326	29324299	4974	139	748.4	17.12
chr1	29324489	29324994	506	10	55.65	9.98
chr1	29333534	29334108	575	13	74.92	9.98
chr1	29433692	29434288	597	11	56.65	8.56
chr1	29434339	29435193	855	15	69.12	11.41
chr1	29435286	29439320	4035	157	1045.76	25.67
chr1	29442259	29442969	711	15	79.89	11.41
chr1	29445141	29445702	562	10	51.41	9.98
chr1	29457185	29458637	1453	57	395.37	24.25
chr1	29459046	29460708	1663	56	354.52	21.39
chr1	29460782	29461735	954	29	180.98	17.12
chr1	29466057	29468318	2262	55	278.73	11.41
chr1	29468420	29469001	582	10	50.01	8.56
chr1	29470261	29471570	1310	28	136.71	9.98
chr1	29530473	29531003	531	16	107.25	15.69
chr1	29531114	29532370	1257	25	116.96	11.41
chr1	29532464	29533003	540	10	53.01	11.41
chr1	29534672	29535297	626	14	78.86	11.41
chr1	29535300	29536168	869	17	83.46	12.84
chr1	29539762	29540393	632	12	61.92	11.41
chr1	29542393	29543338	946	18	85.55	15.69
chr1	29559880	29560680	801	16	80.75	9.98
chr1	29570449	29571577	1129	25	127.22	14.26
chr1	29582328	29583876	1549	38	199.47	17.12
chr1	29583983	29584564	582	10	50.01	9.98
chr1	29587358	29587922	565	10	51.19	11.41
chr1	29589372	29590354	983	20	98.48	11.41
chr1	29605431	29606037	607	11	55.93	9.98
chr1	29615079	29615674	596	11	56.73	9.98
chr1	29622337	29622874	538	11	61.26	12.84
chr1	29637728	29638505	778	14	66.85	9.98
chr1	29638579	29639829	1251	29	150.02	14.26
chr1	29642542	29643179	638	11	53.76	9.98
chr1	29655683	29656228	546	11	60.6	12.84
chr1	29657682	29658730	1049	24	125.84	12.84
chr1	29672416	29672970	555	11	59.87	11.41
chr1	29673222	29674094	873	28	171.64	19.97
chr1	29675085	29679413	4329	123	672.51	27.1
chr1	29679673	29680614	942	22	118.5	12.84
chr1	29710145	29710803	659	12	59.93	9.98
chr1	29721233	29721785	553	10	52.05	9.98
chr1	29734164	29734687	524	10	54.23	8.56
chr1	29803848	29804487	640	12	61.32	9.98
chr1	29818623	29819166	544	10	52.71	8.56
chr1	29822570	29823857	1288	29	146.77	11.41
chr1	29828928	29829552	625	13	70.55	9.98
chr1	29829557	29829980	424	10	62.97	11.41
chr1	29854361	29854916	556	12	68.09	12.84
chr1	29889725	29890311	587	12	65.46	11.41
chr1	29892856	29894337	1482	32	155.09	11.41
chr1	29910007	29911052	1046	20	93.72	9.98
chr1	29911141	29913928	2788	72	375.6	21.39
chr1	29935012	29936356	1345	29	133.9	12.84
chr1	29949482	29950440	959	28	170.85	17.12
chr1	29950456	29951406	951	24	135.06	11.41
chr1	29951468	29952153	686	15	82.02	11.41
chr1	29966826	29967391	566	10	51.12	11.41
chr1	29997226	29997770	545	11	60.68	9.98
chr1	30013298	30014139	842	16	77.65	12.84
chr1	30024219	30024800	582	11	57.77	14.26
chr1	30027979	30028706	728	18	104.04	15.69
chr1	30047027	30047554	528	10	53.92	9.98
chr1	30048831	30049446	616	11	55.28	9.98
chr1	30061699	30062467	769	16	83.31	14.26
chr1	30063442	30064152	711	13	63.92	9.98
chr1	30068913	30069495	583	13	74.19	9.98
chr1	30111300	30112296	997	20	97.39	9.98
chr1	30135836	30136409	574	10	50.56	8.56
chr1	30146292	30147190	899	19	97.15	12.84
chr1	30147484	30148189	706	14	72.16	11.41
chr1	30157526	30158100	575	13	74.92	9.98
chr1	30176669	30177205	537	10	53.24	9.98
chr1	30204508	30205091	584	11	57.62	9.98
chr1	30214229	30215067	839	16	77.87	9.98
chr1	30215072	30215565	494	10	56.63	8.56
chr1	30295848	30296387	540	10	53.01	9.98
chr1	30298316	30300172	1857	40	189.23	11.41
chr1	30301513	30302879	1367	33	173.5	14.26
chr1	30303039	30303613	575	13	74.92	14.26
chr1	30355927	30356515	589	15	91.24	11.41
chr1	30357138	30357708	571	10	50.77	8.56
chr1	30403214	30403887	674	13	66.65	9.98
chr1	30411745	30412427	683	12	58.25	9.98
chr1	30413300	30413893	594	11	56.87	9.98
chr1	30421786	30423876	2091	50	251.88	19.97
chr1	30430834	30431814	981	29	177.74	18.54
chr1	30431861	30432427	567	12	67.13	9.98
chr1	30445148	30445855	708	12	56.56	8.56
chr1	30448620	30449286	667	13	67.19	9.98
chr1	30456037	30456745	709	14	71.92	9.98
chr1	30481798	30482403	606	11	56	11.41
chr1	30486157	30486718	562	12	67.56	8.56
chr1	30488617	30489374	758	16	84.21	11.41
chr1	30500611	30501161	551	10	52.2	9.98
chr1	30503519	30505456	1938	51	275.28	24.25
chr1	30505827	30506340	514	10	55.01	9.98
chr1	30514135	30514667	533	10	53.54	8.56
chr1	30515390	30515932	543	10	52.79	9.98
chr1	30535267	30535834	568	10	50.98	9.98
chr1	30536484	30537063	580	10	50.15	11.41
chr1	30537315	30538056	742	13	61.76	9.98
chr1	30543842	30544346	505	10	55.73	8.56
chr1	30545081	30545809	729	14	70.39	8.56
chr1	30550101	30551089	989	20	98.01	9.98
chr1	30552680	30554723	2044	62	364.78	19.97
chr1	30558748	30559434	687	12	57.97	11.41
chr1	30559441	30560038	598	12	64.56	11.41
chr1	30561265	30561896	632	12	61.92	8.56
chr1	30562681	30563218	538	10	53.16	11.41
chr1	30563261	30563873	613	12	55.5	12.84
chr1	30586532	30590045	3514	142	969.48	31.38
chr1	30590933	30591420	488	11	65.65	11.41
chr1	30592560	30593664	1105	28	155.14	12.84
chr1	30596224	30596803	580	10	50.15	11.41
chr1	30622015	30623098	1084	23	114.57	14.26
chr1	30639265	30639843	579	11	58	9.98
chr1	30674053	30674926	874	16	75.35	9.98
chr1	30690136	30690595	460	11	68.34	9.98
chr1	30767707	30768274	568	11	58.85	9.98
chr1	30781490	30782041	552	10	52.13	8.56
chr1	30840082	30840735	654	12	60.29	12.84
chr1	30842467	30843012	546	10	52.57	8.56
chr1	30863756	30864249	494	10	56.63	11.41
chr1	30888748	30889538	791	16	81.54	11.41
chr1	30926713	30931990	5278	233	1658.26	34.23
chr1	30931995	30932766	772	16	83.06	11.41
chr1	31037231	31037961	731	15	78.25	12.84
chr1	31049895	31050876	982	26	149.8	17.12
chr1	31050959	31052782	1824	64	412.74	21.39
chr1	31053233	31054198	966	23	124.87	17.12
chr1	31055920	31057340	1421	44	268.11	22.82
chr1	31057709	31058473	765	14	67.76	9.98
chr1	31058877	31059935	1059	29	168.91	14.26
chr1	31060148	31065605	5458	164	924.96	19.97
chr1	31066161	31066738	578	10	50.29	8.56
chr1	31066879	31067452	574	12	66.54	9.98
chr1	31069689	31071895	2207	71	431.23	18.54
chr1	31072063	31073169	1107	28	154.94	12.84
chr1	31073218	31074804	1587	41	222	14.26
chr1	31075095	31076135	1041	23	118.17	12.84
chr1	31078170	31080714	2545	64	329.49	14.26
chr1	31081959	31082596	638	13	69.48	9.98
chr1	31082617	31085608	2992	88	498.76	18.54
chr1	31085893	31087106	1214	26	128.32	14.26
chr1	31087657	31088802	1146	29	159.9	14.26
chr1	31088926	31090754	1829	47	250.83	14.26
chr1	31091879	31094517	2639	84	502.92	19.97
chr1	31095332	31096482	1151	32	177.3	21.39
chr1	31101518	31102170	653	14	76.49	9.98
chr1	31102338	31102857	520	10	54.54	8.56
chr1	31103073	31104726	1654	38	189.92	15.69
chr1	31109340	31110089	750	18	101.9	15.69
chr1	31111386	31113591	2206	64	364.78	14.26
chr1	31113835	31114519	685	12	58.11	9.98
chr1	31118389	31121329	2941	78	413.23	18.54
chr1	31123054	31124459	1406	38	213.76	19.97
chr1	31124874	31125663	790	16	81.62	14.26
chr1	31128526	31128986	461	10	59.48	12.84
chr1	31129900	31131510	1611	34	160.79	11.41
chr1	31131778	31132764	987	21	106.24	11.41
chr1	31133619	31134108	490	10	56.97	11.41
chr1	31134155	31134909	755	17	92.83	11.41
chr1	31135633	31136663	1031	24	127.45	15.69
chr1	31137773	31139290	1518	33	160.25	14.26
chr1	31139655	31140810	1156	26	133.21	18.54
chr1	31148883	31149428	546	13	77.66	11.41
chr1	31149725	31150692	968	22	116.16	9.98
chr1	31150811	31155686	4876	176	1117.16	31.38
chr1	31155767	31156725	959	32	209.77	19.97
chr1	31167807	31168471	665	12	59.5	8.56
chr1	31481027	31481879	853	15	69.25	12.84
chr1	31481900	31482552	653	17	102.71	14.26
chr1	31483059	31485122	2064	63	371.89	17.12
chr1	31485138	31487023	1886	72	486	27.1
chr1	31655815	31657337	1523	43	246.81	15.69
chr1	31657381	31659658	2278	66	375.21	17.12
chr1	31659739	31660593	855	19	100.87	12.84
chr1	31826397	31827439	1043	24	126.37	17.12
chr1	31855017	31856070	1054	30	178.71	18.54
chr1	31941303	31941853	551	10	52.2	8.56
chr1	31955004	31955522	519	10	54.62	9.98
chr1	32001008	32003638	2631	72	391.62	15.69
chr1	32009762	32012974	3213	128	868.85	32.81
chr1	32662630	32663359	730	13	62.59	11.41
chr1	32664187	32665539	1353	29	141.3	18.54
chr1	32665987	32666662	676	13	66.5	8.56
chr1	32702136	32705119	2984	91	527.87	18.54
chr1	32979603	32980319	717	13	55.98	9.98
chr1	33107274	33110964	3691	123	748.75	21.39
chr1	33119682	33120860	1179	29	156.69	14.26
chr1	33121492	33122754	1263	30	157.43	12.84
chr1	33123141	33127113	3973	123	713.35	22.82
chr1	33127907	33132232	4326	131	747.11	17.12
chr1	33137001	33137566	566	10	51.12	9.98
chr1	33137694	33140297	2604	95	617.2	22.82
chr1	33140337	33141360	1024	47	359.77	31.38
chr1	33147940	33148816	877	18	90.81	12.84
chr1	33156220	33156773	554	12	68.26	12.84
chr1	33158117	33158654	538	10	53.16	8.56
chr1	33158860	33159619	760	17	92.38	11.41
chr1	33161654	33163570	1917	55	313.83	18.54
chr1	33163695	33164530	836	16	78.09	9.98
chr1	33209701	33211341	1641	60	398.1	24.25
chr1	33319632	33320760	1129	33	198.24	19.97
chr1	33320921	33321558	638	16	95.22	15.69
chr1	33439322	33439954	633	12	61.84	12.84
chr1	33494063	33494642	580	10	50.15	7.13
chr1	33544276	33544858	583	11	57.7	8.56
chr1	33544937	33545711	775	18	99.55	9.98
chr1	33764287	33764855	569	10	50.91	9.98
chr1	33770530	33771063	534	10	53.46	11.41
chr1	33831781	33832409	629	12	62.14	9.98
chr1	33832860	33833463	604	11	56.14	11.41
chr1	33871818	33872492	675	12	58.8	9.98
chr1	33876348	33876927	580	10	50.15	9.98
chr1	33898459	33899387	929	21	111.18	14.26
chr1	33919299	33919866	568	10	50.98	7.13
chr1	33922449	33924079	1631	39	200.42	11.41
chr1	33924492	33925563	1072	24	123.82	14.26
chr1	33925743	33926777	1035	22	110.45	9.98
chr1	33927061	33927868	808	14	64.81	11.41
chr1	33936478	33937337	860	23	135.44	17.12
chr1	33940372	33940850	479	10	57.9	12.84
chr1	33969062	33969650	589	11	57.25	9.98
chr1	34008335	34008919	585	12	65.62	9.98
chr1	34019565	34020184	620	11	55	8.56
chr1	34089021	34089564	544	12	69.15	9.98
chr1	34098303	34098865	563	10	51.34	8.56
chr1	34101713	34102439	727	15	78.57	12.84
chr1	34116736	34117409	674	12	58.87	11.41
chr1	34120369	34121200	832	16	78.39	9.98
chr1	34123970	34124515	546	11	60.6	9.98
chr1	34140011	34140589	579	12	66.12	8.56
chr1	34140974	34141649	676	12	58.73	8.56
chr1	34152426	34153004	579	11	58	9.98
chr1	34155469	34155922	454	10	60.11	9.98
chr1	34168324	34168893	570	10	50.84	8.56
chr1	34214498	34215118	621	11	54.93	8.56
chr1	34216761	34217273	513	10	55.09	11.41
chr1	34220765	34221701	937	17	78.54	15.69
chr1	34308303	34309342	1040	22	110.04	11.41
chr1	34309517	34310152	636	11	53.9	8.56
chr1	34346831	34347419	589	11	57.25	8.56
chr1	34364400	34365567	1168	26	132.18	12.84
chr1	34383063	34383783	721	13	63.21	9.98
chr1	34398303	34400258	1956	47	238.73	15.69
chr1	34400393	34400903	511	11	63.57	8.56
chr1	34400944	34402398	1455	47	292.96	24.25
chr1	34402443	34408826	6384	226	1410.7	34.23
chr1	34408839	34409558	720	15	79.14	11.41
chr1	34409682	34410700	1019	21	103.65	9.98
chr1	34411498	34419628	8131	252	1439.52	22.82
chr1	34419647	34420153	507	10	55.57	11.41
chr1	34424774	34425393	620	11	55	9.98
chr1	34425415	34427802	2388	72	418.7	21.39
chr1	34442061	34442453	393	10	65.42	14.26
chr1	34442499	34443141	643	15	85.91	11.41
chr1	34444544	34445192	649	13	68.6	9.98
chr1	34474476	34475041	566	10	51.12	8.56
chr1	34484531	34485120	590	11	57.17	9.98
chr1	34486189	34487172	984	26	149.59	12.84
chr1	34487770	34489056	1287	47	316.04	19.97
chr1	34501132	34501792	661	13	67.65	9.98
chr1	34502941	34504873	1933	38	167.64	12.84
chr1	34505362	34505910	549	10	52.35	11.41
chr1	34505923	34506508	586	11	57.47	9.98
chr1	34584557	34585444	888	18	89.94	14.26
chr1	34601040	34602174	1135	24	118.53	11.41
chr1	34604705	34605933	1229	24	111.26	12.84
chr1	34607139	34607689	551	10	52.2	9.98
chr1	34609998	34610712	715	12	56.11	9.98
chr1	34612566	34613691	1126	28	153.07	17.12
chr1	34614300	34615014	715	13	63.64	9.98
chr1	34616104	34617316	1213	27	136.61	12.84
chr1	34621383	34621964	582	10	50.01	9.98
chr1	34638275	34638895	621	12	62.75	8.56
chr1	34650476	34651073	598	11	56.58	8.56
chr1	34653236	34653904	669	15	83.52	14.26
chr1	34677606	34679425	1820	36	160.52	9.98
chr1	34679715	34680719	1005	24	129.85	19.97
chr1	34681710	34682319	610	11	55.71	8.56
chr1	34686131	34686832	702	12	56.96	12.84
chr1	34707747	34709260	1514	37	194.15	14.26
chr1	34709266	34709728	463	10	59.3	12.84
chr1	34709739	34710328	590	12	65.21	14.26
chr1	34716137	34717986	1850	42	206.16	14.26
chr1	34767769	34768492	724	14	70.77	9.98
chr1	34768581	34769670	1090	24	122.27	12.84
chr1	34770056	34770652	597	12	64.64	8.56
chr1	34775894	34776552	659	12	59.93	8.56
chr1	34786762	34787263	502	12	73.1	14.26
chr1	34820270	34820886	617	12	63.06	11.41
chr1	34886067	34886962	896	21	114.16	9.98
chr1	34886971	34887629	659	18	111.26	15.69
chr1	34891261	34891989	729	13	62.66	9.98
chr1	34927371	34927999	629	12	62.14	8.56
chr1	34943693	34944424	732	15	70.17	14.26
chr1	34962704	34963812	1109	24	120.67	12.84
chr1	35018684	35022093	3410	105	609.84	18.54
chr1	35030349	35030927	579	10	50.22	9.98
chr1	35099945	35100477	533	10	53.54	9.98
chr1	35110981	35111609	629	11	54.38	11.41
chr1	35111684	35112714	1031	22	110.78	11.41
chr1	35119053	35120061	1009	22	112.61	14.26
chr1	35121104	35122291	1188	30	164.57	12.84
chr1	35122328	35125254	2927	99	612.62	24.25
chr1	35125466	35126508	1043	22	109.79	11.41
chr1	35139482	35140061	580	10	50.15	9.98
chr1	35140328	35140897	570	10	50.84	8.56
chr1	35160151	35160826	676	16	91.5	11.41
chr1	35163501	35167737	4237	158	1025.6	29.95
chr1	35167827	35169597	1771	56	330.92	24.25
chr1	35169732	35170615	884	20	106.73	15.69
chr1	35171100	35171657	558	10	51.69	8.56
chr1	35172467	35173026	560	10	51.55	9.98
chr1	35178295	35178810	516	11	63.13	11.41
chr1	35882885	35884593	1709	40	201.82	12.84
chr1	35935516	35936260	745	18	102.38	11.41
chr1	35936282	35938243	1962	54	299.74	17.12
chr1	35938270	35939161	892	24	141.15	14.26
chr1	35939862	35941777	1916	67	430.21	21.39
chr1	35945000	35946491	1492	45	269.09	18.54
chr1	35946801	35947874	1074	26	140.64	14.26
chr1	36362113	36363100	988	24	131.45	12.84
chr1	36363425	36364305	881	20	107	15.69
chr1	36790247	36791174	928	18	86.88	14.26
chr1	36791264	36792048	785	18	98.64	12.84
chr1	36792402	36793314	913	18	88.01	17.12
chr1	36810417	36811931	1515	31	136.63	11.41
chr1	36820015	36820725	711	13	63.92	9.98
chr1	36823104	36823733	630	15	87.14	12.84
chr1	36824076	36825388	1313	33	178.66	14.26
chr1	36828569	36830519	1951	41	189.73	12.84
chr1	36898564	36899150	587	11	57.4	8.56
chr1	36899965	36900831	867	19	99.83	18.54
chr1	36907391	36908172	782	14	66.57	12.84
chr1	36908325	36909141	817	22	130.91	14.26
chr1	36909764	36910429	666	12	59.43	11.41
chr1	36910458	36912286	1829	50	277.63	15.69
chr1	36914960	36916017	1058	23	116.72	9.98
chr1	36916433	36918412	1980	47	236.54	12.84
chr1	36918719	36919546	828	15	70.96	14.26
chr1	36924975	36925533	559	10	51.62	11.41
chr1	36930259	36931479	1221	35	206.43	21.39
chr1	36931707	36932663	957	24	134.46	14.26
chr1	36933117	36933695	579	10	50.22	8.56
chr1	36937247	36937815	569	11	58.77	9.98
chr1	36945778	36946346	569	10	50.91	11.41
chr1	36947114	36948538	1425	38	211.77	17.12
chr1	36948630	36950411	1782	49	273.56	18.54
chr1	36959354	36960216	863	14	54.27	12.84
chr1	36963500	36964190	691	13	65.38	11.41
chr1	36968645	36969510	866	16	75.92	12.84
chr1	36971275	36971960	686	15	82.02	12.84
chr1	36972538	36973300	763	14	67.91	11.41
chr1	36974093	36977614	3522	106	606.03	21.39
chr1	36979943	36980545	603	11	56.22	8.56
chr1	36982392	36982998	607	12	55.93	9.98
chr1	36983027	36983598	572	10	50.7	8.56
chr1	36985822	36986741	920	19	95.44	11.41
chr1	37006266	37007048	783	14	66.5	9.98
chr1	37007294	37014640	7347	224	1267.89	21.39
chr1	37015042	37016099	1058	20	92.86	7.13
chr1	37022460	37024330	1871	34	141.87	9.98
chr1	37025426	37026228	803	16	80.6	11.41
chr1	37027387	37028305	919	19	95.52	15.69
chr1	37029111	37029853	743	13	54.33	11.41
chr1	37046559	37047266	708	15	80.14	12.84
chr1	37056744	37057647	904	18	88.7	11.41
chr1	37070379	37070947	569	11	58.77	9.98
chr1	37081288	37082637	1350	29	133.5	11.41
chr1	37084660	37087850	3191	82	423.52	15.69
chr1	37089163	37089959	797	19	106.14	14.26
chr1	37090033	37090569	537	10	53.24	8.56
chr1	37093561	37094555	995	21	105.58	15.69
chr1	37095036	37096480	1445	35	183.4	17.12
chr1	37098122	37098999	878	26	161.41	17.12
chr1	37100621	37101508	888	17	82.04	12.84
chr1	37101620	37102197	578	13	74.64	12.84
chr1	37104320	37104983	664	17	101.56	18.54
chr1	37143130	37143683	554	11	59.95	9.98
chr1	37150986	37151574	589	12	65.29	9.98
chr1	37170341	37170929	589	11	57.25	8.56
chr1	37171016	37171784	769	18	100.11	11.41
chr1	37173667	37174512	846	16	77.36	15.69
chr1	37177196	37177903	708	12	56.56	8.56
chr1	37181493	37182056	564	10	51.27	8.56
chr1	37220948	37221573	626	12	62.37	9.98
chr1	37238252	37238787	536	10	53.31	8.56
chr1	37263274	37264338	1065	21	100.1	8.56
chr1	37265733	37268718	2986	104	654.51	21.39
chr1	37268742	37278400	9659	349	2183.49	25.67
chr1	37278406	37281129	2724	81	464.15	17.12
chr1	37281482	37282453	972	26	150.85	15.69
chr1	37284152	37285905	1754	43	223.25	14.26
chr1	37295756	37296312	557	10	51.77	8.56
chr1	37308710	37309556	847	19	101.57	12.84
chr1	37310536	37311517	982	21	106.65	11.41
chr1	37324893	37325446	554	10	51.98	8.56
chr1	37325493	37326336	844	17	85.39	9.98
chr1	37330691	37331311	621	11	54.93	9.98
chr1	37331860	37332549	690	12	57.77	9.98
chr1	37342204	37342751	548	11	60.44	9.98
chr1	37347213	37347828	616	12	63.14	9.98
chr1	37348275	37348786	512	12	72.13	11.41
chr1	37353701	37354238	538	10	53.16	11.41
chr1	37383064	37384131	1068	22	99.87	9.98
chr1	37385718	37386290	573	10	50.63	8.56
chr1	37419911	37420563	653	12	60.36	11.41
chr1	37427615	37428413	799	15	73.03	9.98
chr1	37436198	37436769	572	10	50.7	8.56
chr1	37471522	37472442	921	19	95.36	15.69
chr1	37472448	37472891	444	10	61.04	11.41
chr1	37473383	37473942	560	10	51.55	8.56
chr1	37474392	37476458	2067	43	196.51	9.98
chr1	37491903	37492440	538	10	53.16	9.98
chr1	37492500	37493294	795	18	97.74	15.69
chr1	37494119	37494764	646	11	53.22	11.41
chr1	37494782	37495965	1184	27	139.13	9.98
chr1	37495982	37496966	985	24	131.74	14.26
chr1	37497214	37498313	1100	20	89.91	9.98
chr1	37500190	37501043	854	17	84.61	17.12
chr1	37516440	37517039	600	11	56.43	12.84
chr1	37518536	37519175	640	12	61.32	9.98
chr1	37520717	37521302	586	11	57.47	8.56
chr1	37530988	37531758	771	14	67.34	12.84
chr1	37535102	37535676	575	10	50.49	9.98
chr1	37537056	37537651	596	11	56.73	8.56
chr1	37547748	37548355	608	11	55.85	8.56
chr1	37550978	37552161	1184	28	147.6	11.41
chr1	37553719	37558426	4708	169	1069.94	21.39
chr1	37561441	37562080	640	13	69.32	9.98
chr1	37562596	37563117	522	10	54.38	7.13
chr1	37594414	37594995	582	10	50.01	8.56
chr1	37599066	37599886	821	14	63.95	12.84
chr1	37600354	37603267	2914	84	470.46	17.12
chr1	37620771	37621418	648	12	60.73	8.56
chr1	37629946	37630519	574	11	58.38	8.56
chr1	37631121	37631749	629	13	62.14	9.98
chr1	37632310	37633074	765	17	91.94	11.41
chr1	37633174	37634285	1112	28	154.44	17.12
chr1	37666693	37667716	1024	23	119.64	9.98
chr1	37684457	37684984	528	11	62.1	9.98
chr1	37854142	37854711	570	10	50.84	12.84
chr1	37854734	37855508	775	17	91.07	14.26
chr1	37856091	37857066	976	25	141.44	14.26
chr1	37858912	37859698	787	18	98.45	11.41
chr1	37860045	37861073	1029	20	94.97	9.98
chr1	37864216	37864917	702	13	64.57	8.56
chr1	37865003	37865698	696	14	72.95	11.41
chr1	37866690	37875194	8505	347	2348.14	31.38
chr1	37875861	37877399	1539	42	235.92	19.97
chr1	37878853	37879990	1138	22	102.46	9.98
chr1	37880027	37881396	1370	37	208.51	15.69
chr1	37881412	37882166	755	21	128.48	17.12
chr1	37973176	37974648	1473	50	320.27	18.54
chr1	37978079	37978678	600	11	56.43	12.84
chr1	37981508	37982331	824	13	56.54	11.41
chr1	37983537	37984138	602	13	72.51	9.98
chr1	37987948	37988536	589	13	73.65	11.41
chr1	37990059	37992771	2713	103	673.3	31.38
chr1	37993128	37996533	3406	99	554.01	22.82
chr1	37996540	37997097	558	10	51.69	9.98
chr1	37997301	37997930	630	11	54.31	11.41
chr1	37997941	37998421	481	11	66.3	11.41
chr1	37998547	37999118	572	11	58.54	9.98
chr1	38000087	38006114	6028	215	1339.4	29.95
chr1	38006127	38007289	1163	26	132.61	12.84
chr1	38007541	38008143	603	12	64.16	8.56
chr1	38019278	38019887	610	11	55.71	8.56
chr1	38026269	38027232	964	22	116.52	12.84
chr1	38028662	38029348	687	13	65.67	11.41
chr1	38029515	38030094	580	11	57.92	9.98
chr1	38030330	38031715	1386	42	253.2	19.97
chr1	38032268	38032849	582	10	50.01	8.56
chr1	38033118	38033792	675	12	58.8	9.98
chr1	38277357	38277928	572	10	50.7	11.41
chr1	38278755	38284474	5720	222	1466.86	25.67
chr1	38284598	38286669	2072	46	220.23	14.26
chr1	38369223	38380257	11035	410	2607.58	31.38
chr1	38380672	38381985	1314	33	178.56	12.84
chr1	38392150	38392870	721	12	55.72	9.98
chr1	38487491	38488292	802	16	80.67	12.84
chr1	38490557	38491463	907	17	80.66	12.84
chr1	38503919	38504518	600	11	56.43	8.56
chr1	38508296	38510365	2070	53	279.74	14.26
chr1	38510410	38511424	1015	22	112.11	15.69
chr1	38512789	38513382	594	11	56.87	8.56
chr1	38517328	38517854	527	10	54	11.41
chr1	38526378	38527040	663	12	59.64	8.56
chr1	38527441	38529162	1722	43	226.29	12.84
chr1	38529729	38532545	2817	105	688.85	18.54
chr1	38533493	38535194	1702	55	329.82	19.97
chr1	38535213	38536247	1035	23	118.68	15.69
chr1	38540998	38541600	603	11	56.22	11.41
chr1	38542141	38542799	659	13	67.81	9.98
chr1	38543717	38545485	1769	55	331.16	17.12
chr1	38545566	38546372	807	14	64.87	12.84
chr1	38547081	38547681	601	11	56.36	11.41
chr1	38554190	38554798	609	11	55.78	8.56
chr1	38558383	38558958	576	10	50.42	9.98
chr1	38561048	38562230	1183	24	114.73	9.98
chr1	38565650	38566318	669	14	75.14	11.41
chr1	38566563	38567167	605	13	72.25	11.41
chr1	38594685	38595263	579	10	50.22	8.56
chr1	38601403	38601975	573	10	50.63	8.56
chr1	38604863	38605395	533	10	53.54	9.98
chr1	38606176	38607822	1647	35	165.93	11.41
chr1	38608306	38609845	1540	37	191.72	15.69
chr1	38610417	38611034	618	14	79.59	12.84
chr1	38658801	38659690	890	21	114.72	12.84
chr1	38659778	38660559	782	19	107.57	14.26
chr1	38660958	38661660	703	13	64.5	8.56
chr1	38662792	38663546	755	15	76.34	14.26
chr1	38676509	38677452	944	24	135.76	15.69
chr1	38677986	38678491	506	12	72.71	15.69
chr1	38679441	38680056	616	12	63.14	11.41
chr1	38685555	38686189	635	14	78.06	12.84
chr1	38688834	38689626	793	16	81.38	11.41
chr1	38690333	38690899	567	12	67.13	9.98
chr1	38693534	38695401	1868	35	149.5	9.98
chr1	38696564	38697107	544	10	52.71	8.56
chr1	38699736	38701147	1412	28	128.75	14.26
chr1	38701305	38701948	644	12	61.02	9.98
chr1	38705463	38706347	885	27	170.15	17.12
chr1	38706757	38707304	548	10	52.42	8.56
chr1	38710311	38710904	594	12	64.89	9.98
chr1	38712777	38717960	5184	187	1185.09	25.67
chr1	38726241	38727432	1192	26	130.14	12.84
chr1	38727436	38728310	875	18	90.97	9.98
chr1	38733283	38733810	528	10	53.92	8.56
chr1	38736393	38738822	2430	58	288.84	17.12
chr1	38739344	38739876	533	10	53.54	11.41
chr1	38739924	38742968	3045	80	420.43	15.69
chr1	38744146	38744814	669	13	59.22	9.98
chr1	38745890	38746627	738	22	139.92	12.84
chr1	38746850	38747683	834	23	138.27	14.26
chr1	38747730	38749820	2091	62	359.26	17.12
chr1	38755201	38755827	627	12	62.29	8.56
chr1	38758082	38758658	577	11	58.15	8.56
chr1	38759983	38762019	2037	48	239.85	15.69
chr1	38784381	38786654	2274	54	260.74	12.84
chr1	38789912	38790475	564	10	51.27	8.56
chr1	38807569	38808195	627	11	54.51	8.56
chr1	38810833	38811530	698	13	64.86	12.84
chr1	38812675	38813163	489	10	57.05	12.84
chr1	38814272	38818443	4172	144	892.73	27.1
chr1	38818458	38819419	962	20	100.15	9.98
chr1	38831023	38831607	585	11	57.55	8.56
chr1	38926360	38927223	864	18	91.86	17.12
chr1	38928398	38929044	647	13	68.76	12.84
chr1	38931508	38932230	723	14	70.85	12.84
chr1	38964958	38965561	604	11	56.14	8.56
chr1	38970009	38970537	529	10	53.84	11.41
chr1	39017491	39018043	553	10	52.05	9.98
chr1	39019204	39023307	4104	126	726.14	18.54
chr1	39026567	39027424	858	21	117.75	14.26
chr1	39030944	39031437	494	10	56.63	11.41
chr1	39040649	39045044	4396	163	1053.66	25.67
chr1	39046225	39046925	701	13	64.64	9.98
chr1	39046993	39047515	523	10	54.31	9.98
chr1	39057436	39058452	1017	25	137.39	22.82
chr1	39058479	39059171	693	14	73.19	12.84
chr1	39059246	39059766	521	10	54.46	11.41
chr1	39318273	39319226	954	20	100.79	11.41
chr1	39319297	39321379	2083	63	369.63	19.97
chr1	39321388	39322316	929	21	111.18	12.84
chr1	39728957	39729600	644	11	53.36	9.98
chr1	39729888	39730554	667	13	67.19	8.56
chr1	39730669	39732971	2303	69	400.39	24.25
chr1	39905673	39906492	820	16	79.29	12.84
chr1	39907813	39910573	2761	87	516.7	18.54
chr1	39910963	39911541	579	11	58	9.98
chr1	39918081	39920024	1944	42	198.3	12.84
chr1	39921105	39923887	2783	88	523.6	24.25
chr1	39924582	39926064	1483	38	205.87	15.69
chr1	39926200	39930601	4402	138	804.46	22.82
chr1	39930607	39934007	3401	108	639.64	21.39
chr1	39935282	39937807	2526	67	357.72	18.54
chr1	39955418	39956056	639	12	61.39	9.98
chr1	39961495	39962379	885	18	90.18	12.84
chr1	39962714	39963828	1115	28	154.15	14.26
chr1	39964037	39964607	571	10	50.77	9.98
chr1	39964615	39966939	2325	75	455.17	22.82
chr1	39967000	39967597	598	13	72.86	9.98
chr1	39967659	39968232	574	10	50.56	8.56
chr1	39969374	39970343	970	19	91.56	9.98
chr1	39970834	39972656	1823	48	260.29	19.97
chr1	39972673	39973136	464	10	59.21	9.98
chr1	40025191	40026130	940	28	173.09	18.54
chr1	40026575	40029072	2498	62	316.69	15.69
chr1	40029724	40030389	666	11	51.91	11.41
chr1	40031954	40032468	515	10	54.93	11.41
chr1	40066830	40067602	773	15	67.2	8.56
chr1	40067722	40068570	849	19	101.4	12.84
chr1	40136773	40140110	3338	110	667.06	24.25
chr1	40140567	40142392	1826	53	305.52	18.54
chr1	40553704	40556712	3009	86	478.33	15.69
chr1	40877631	40878239	609	12	63.69	9.98
chr1	40890723	40891441	719	14	71.15	9.98
chr1	40891762	40893107	1346	26	118.14	15.69
chr1	40896580	40897156	577	10	50.36	9.98
chr1	40907697	40908835	1139	23	110.21	11.41
chr1	40911383	40912771	1389	36	197.58	11.41
chr1	40917090	40917629	540	12	69.51	11.41
chr1	41020131	41023204	3074	89	498.76	18.54
chr1	41099175	41100111	937	19	94.1	9.98
chr1	41120858	41123533	2676	104	689.33	31.38
chr1	41123870	41125698	1829	43	216.36	17.12
chr1	41480231	41480835	605	12	64	9.98
chr1	41599427	41599877	451	10	60.39	9.98
chr1	41600353	41602442	2090	61	350.03	17.12
chr1	41605986	41606766	781	15	66.64	9.98
chr1	41618447	41623098	4652	155	937.75	21.39
chr1	41633100	41635212	2113	52	266.92	14.26
chr1	41675334	41676104	771	17	91.42	11.41
chr1	41725114	41725680	567	11	58.92	9.98
chr1	42288045	42288771	727	13	62.79	12.84
chr1	42289590	42290391	802	17	88.78	12.84
chr1	42306521	42307215	695	12	57.43	12.84
chr1	42307297	42307781	485	10	57.39	11.41
chr1	42619205	42620263	1059	26	142.07	15.69
chr1	42620294	42620971	678	19	118.47	19.97
chr1	43382173	43382986	814	18	96.06	12.84
chr1	43383021	43384118	1098	26	138.4	11.41
chr1	43385355	43386128	774	18	99.64	17.12
chr1	43386480	43387999	1520	45	265.79	15.69
chr1	43388079	43388893	815	17	87.71	12.84
chr1	43767959	43769146	1188	28	147.23	14.26
chr1	43769932	43770454	523	11	62.52	11.41
chr1	44171187	44171861	675	13	66.58	12.84
chr1	44172025	44172639	615	16	97.61	12.84
chr1	45443539	45444067	529	10	53.84	8.56
chr1	46367291	46370144	2854	123	874.61	32.81
chr1	46685104	46688219	3116	118	778.85	22.82
chr1	46688261	46688825	565	11	59.08	8.56
chr1	46690466	46691047	582	12	65.87	9.98
chr1	46700487	46700988	502	10	55.97	11.41
chr1	46703962	46704713	752	26	177.73	18.54
chr1	46704763	46706496	1734	75	543.11	25.67
chr1	46711695	46713091	1397	37	205.69	18.54
chr1	46720771	46721312	542	10	52.86	9.98
chr1	46721943	46728918	6976	238	1439.95	24.25
chr1	46728980	46731380	2401	97	658.61	28.53
chr1	46731417	46734095	2679	103	688.87	25.67
chr1	46751526	46752218	693	12	57.56	11.41
chr1	46771858	46773283	1426	38	211.67	14.26
chr1	46775079	46775666	588	14	82.4	12.84
chr1	46780120	46780746	627	12	62.29	9.98
chr1	46780993	46784253	3261	118	747.35	21.39
chr1	46964916	46965451	536	10	53.31	9.98
chr1	46978968	46979902	935	25	145.69	14.26
chr1	46980866	46981944	1079	20	91.37	9.98
chr1	46982030	46983349	1320	28	135.89	11.41
chr1	46983678	46984769	1092	24	122.1	14.26
chr1	46987649	46988084	436	10	61.8	11.41
chr1	46995666	46996717	1052	22	109.07	12.84
chr1	47002012	47002927	916	18	87.78	12.84
chr1	47004309	47004870	562	10	51.41	11.41
chr1	47005574	47006148	575	10	50.49	9.98
chr1	47045135	47045737	603	12	64.16	11.41
chr1	47199745	47200375	631	13	70.06	9.98
chr1	47233246	47233929	684	13	65.9	11.41
chr1	47260965	47262086	1122	31	180.42	14.26
chr1	47262125	47263330	1206	34	198.83	17.12
chr1	47288297	47289047	751	12	53.84	11.41
chr1	47652378	47654250	1873	40	187.94	12.84
chr1	47654724	47655691	968	27	160.46	14.26
chr1	47656064	47657459	1396	33	170.83	12.84
chr1	47657500	47658063	564	10	51.27	8.56
chr1	47658695	47659263	569	10	50.91	9.98
chr1	47667016	47667627	612	12	63.45	9.98
chr1	47669359	47673675	4317	160	1034.41	25.67
chr1	47673722	47675379	1658	54	335.42	21.39
chr1	47675961	47691403	15443	611	3100	31.38
chr1	47693162	47693751	590	15	91.13	12.84
chr1	47695971	47696539	569	12	66.96	12.84
chr1	47696755	47701901	5147	160	924	18.54
chr1	47703531	47704106	576	11	58.23	11.41
chr1	47731757	47732381	625	11	54.65	11.41
chr1	47733013	47734188	1176	26	131.49	11.41
chr1	47740856	47741496	641	11	53.56	11.41
chr1	47744121	47747476	3356	98	550.38	22.82
chr1	47747800	47748367	568	11	58.85	9.98
chr1	47749174	47749780	607	12	55.93	11.41
chr1	47808257	47809041	785	18	98.64	12.84
chr1	47838245	47838807	563	10	51.34	8.56
chr1	47943431	47944092	662	13	67.58	8.56
chr1	47944175	47952428	8254	269	1587.58	18.54
chr1	47952472	47953393	922	22	120.36	12.84
chr1	47953588	47954147	560	10	51.55	9.98
chr1	47962054	47964575	2522	90	577.96	19.97
chr1	47970213	47971024	812	15	72.09	11.41
chr1	47973659	47974621	963	20	100.07	15.69
chr1	47976421	47976946	526	10	54.07	9.98
chr1	47977534	47978116	583	11	57.7	8.56
chr1	48000064	48000782	719	19	113.96	18.54
chr1	48071765	48072695	931	18	86.66	12.84
chr1	48098697	48099247	551	10	52.2	11.41
chr1	48125130	48126404	1275	28	139.6	9.98
chr1	48160869	48161772	904	18	88.7	12.84
chr1	48161953	48164113	2161	55	288.33	14.26
chr1	48167516	48168136	621	11	54.93	11.41
chr1	48171629	48172264	636	12	61.61	8.56
chr1	48220665	48221361	697	15	81.07	15.69
chr1	48221560	48227073	5514	168	956.02	22.82
chr1	48229181	48229794	614	13	71.48	11.41
chr1	48231033	48232831	1799	36	162.07	9.98
chr1	48233132	48235452	2321	71	417.19	14.26
chr1	48235848	48237922	2075	72	458.55	22.82
chr1	48238790	48239313	524	10	54.23	9.98
chr1	48251815	48253053	1239	26	126.29	12.84
chr1	48274736	48275489	754	12	53.65	12.84
chr1	48290366	48291187	822	14	63.89	12.84
chr1	48719412	48720238	827	18	94.94	17.12
chr1	48770689	48771247	559	11	59.55	8.56
chr1	48772718	48773248	531	10	53.69	8.56
chr1	48912211	48912809	599	11	56.51	9.98
chr1	49150563	49151070	508	10	55.49	9.98
chr1	49151636	49152214	579	10	50.22	8.56
chr1	49186064	49187218	1155	24	116.93	9.98
chr1	49197141	49197659	519	10	54.62	9.98
chr1	49209923	49210444	522	10	54.38	11.41
chr1	50281034	50288707	7674	267	1644.21	27.1
chr1	50514680	50515297	618	11	55.14	9.98
chr1	50515681	50516520	840	20	110.76	12.84
chr1	50516665	50517854	1190	30	164.37	17.12
chr1	50568058	50568739	682	14	74.07	11.41
chr1	50577306	50577758	453	10	60.21	8.56
chr1	50592774	50593377	604	11	56.14	11.41
chr1	50603856	50604813	958	21	108.67	11.41
chr1	50604911	50606866	1956	62	375.5	19.97
chr1	50608766	50609726	961	17	76.91	12.84
chr1	50644252	50645230	979	22	115.19	9.98
chr1	50646588	50647712	1125	33	198.7	14.26
chr1	50648584	50649449	866	18	91.7	11.41
chr1	50650024	50662196	12173	492	3100	25.67
chr1	50662203	50672708	10506	448	3092.38	29.95
chr1	51212848	51223413	10566	440	3006.63	32.81
chr1	51223430	51225318	1889	52	289.38	15.69
chr1	51256161	51256707	547	12	68.88	9.98
chr1	51289238	51289857	620	12	62.83	11.41
chr1	51311016	51311580	565	10	51.19	9.98
chr1	51317084	51317677	594	11	56.87	12.84
chr1	51318361	51318921	561	11	59.4	11.41
chr1	51581342	51582228	887	22	123.71	14.26
chr1	51582297	51585049	2753	87	517.69	24.25
chr1	52123765	52124359	595	11	56.8	8.56
chr1	52128672	52129216	545	11	60.68	11.41
chr1	52134368	52135332	965	23	124.96	15.69
chr1	52149370	52149992	623	11	54.79	9.98
chr1	52186908	52187737	830	16	78.54	12.84
chr1	52193942	52196128	2187	46	203.02	14.26
chr1	52197841	52199972	2132	48	231.56	12.84
chr1	52200191	52201136	946	21	109.7	14.26
chr1	52228568	52229954	1387	38	215.79	15.69
chr1	52230171	52231798	1628	49	290.9	22.82
chr1	52232093	52232616	524	11	62.44	11.41
chr1	52462974	52463489	516	10	54.85	9.98
chr1	52465277	52466277	1001	21	105.09	11.41
chr1	52466678	52467247	570	11	58.69	9.98
chr1	52467279	52468097	819	19	104.09	11.41
chr1	52468881	52469836	956	23	125.81	19.97
chr1	52470885	52471412	528	10	53.92	9.98
chr1	52471508	52472295	788	15	73.84	11.41
chr1	52472885	52477727	4843	171	1071.21	31.38
chr1	52478858	52481896	3039	130	919.18	35.66
chr1	52482038	52482505	468	10	58.86	9.98
chr1	52482559	52483143	585	14	82.69	12.84
chr1	52484244	52485025	782	13	59.13	14.26
chr1	52485920	52486913	994	23	122.3	12.84
chr1	52870084	52871445	1362	38	218.5	17.12
chr1	52871575	52873331	1757	47	258.14	15.69
chr1	53079740	53083161	3422	106	617.91	19.97
chr1	53159745	53160458	714	13	63.71	9.98
chr1	53163026	53164428	1403	41	241.75	15.69
chr1	53164859	53165417	559	11	59.55	11.41
chr1	53187039	53187731	693	15	81.42	12.84
chr1	53188630	53189081	452	13	87.82	17.12
chr1	53190198	53191072	875	21	116.12	12.84
chr1	53199489	53200256	768	13	60.03	9.98
chr1	53296594	53300170	3577	98	526.29	15.69
chr1	53300549	53303357	2809	110	742.26	24.25
chr1	53303604	53304227	624	11	54.72	8.56
chr1	53973273	53974290	1018	22	111.85	9.98
chr1	53974867	53977259	2393	89	586.41	25.67
chr1	53977905	53979236	1332	35	194.47	14.26
chr1	55211360	55212717	1358	34	183.03	15.69
chr1	55217387	55219591	2205	70	421.78	15.69
chr1	55219741	55221401	1661	40	206.19	17.12
chr1	55234873	55236989	2117	68	413.45	19.97
chr1	55272461	55274754	2294	51	242.5	11.41
chr1	55274904	55275620	717	13	55.98	12.84
chr1	55275741	55279978	4238	164	1087.8	27.1
chr1	55280424	55281003	580	10	50.15	9.98
chr1	55660782	55661328	547	10	52.49	7.13
chr1	55664184	55664875	692	14	73.27	11.41
chr1	55744282	55744937	656	12	60.15	9.98
chr1	55756730	55757398	669	15	83.52	12.84
chr1	55816467	55817074	608	11	55.85	9.98
chr1	55882244	55882834	591	11	57.1	11.41
chr1	55955726	55956303	578	11	58.08	11.41
chr1	55958027	55958684	658	12	60	9.98
chr1	55961079	55961624	546	10	52.57	8.56
chr1	55980282	55981417	1136	35	216.46	22.82
chr1	55982239	55983119	881	17	82.56	12.84
chr1	55988042	55988685	644	13	69	12.84
chr1	55989342	55989903	562	11	59.32	11.41
chr1	56117841	56118364	524	10	54.23	8.56
chr1	56714946	56715747	802	17	88.78	9.98
chr1	56865370	56866015	646	14	77.1	9.98
chr1	56880444	56883559	3116	126	863.14	35.66
chr1	56883583	56886860	3278	108	645.45	29.95
chr1	56975102	56975700	599	11	56.51	8.56
chr1	57094447	57095005	559	10	51.62	9.98
chr1	57108516	57109077	562	10	51.41	8.56
chr1	57139751	57140291	541	11	61.01	11.41
chr1	57173011	57173583	573	11	58.46	8.56
chr1	57175179	57175740	562	10	51.41	9.98
chr1	57320035	57320535	501	11	64.46	9.98
chr1	57324019	57324577	559	10	51.62	8.56
chr1	57357888	57358461	574	10	50.56	8.56
chr1	57372844	57373785	942	19	93.71	11.41
chr1	57506570	57507086	517	12	71.65	9.98
chr1	57509102	57509771	670	12	59.15	9.98
chr1	57527195	57528294	1100	20	89.91	11.41
chr1	57645429	57645907	479	10	57.9	11.41
chr1	57646545	57647137	593	12	64.97	9.98
chr1	57654490	57661599	7110	250	1551.37	34.23
chr1	57661637	57664732	3096	106	659.52	19.97
chr1	57665558	57666136	579	14	83.28	14.26
chr1	57670677	57671246	570	10	50.84	8.56
chr1	57688974	57690088	1115	25	128.43	11.41
chr1	57690137	57690706	570	11	58.69	8.56
chr1	57702090	57702708	619	12	62.91	11.41
chr1	57731156	57732071	916	17	80.02	14.26
chr1	57732636	57733579	944	19	93.55	12.84
chr1	57750799	57751477	679	13	66.27	11.41
chr1	57751563	57752139	577	10	50.36	8.56
chr1	57755750	57756415	666	11	51.91	11.41
chr1	57826396	57826940	545	10	52.64	11.41
chr1	57836858	57838172	1315	28	136.3	17.12
chr1	57869553	57870129	577	10	50.36	9.98
chr1	57871048	57871699	652	12	60.44	8.56
chr1	57875614	57876256	643	12	61.09	8.56
chr1	57880397	57880908	512	11	63.48	11.41
chr1	57889322	57889924	603	12	64.16	8.56
chr1	57919288	57920060	773	15	67.2	9.98
chr1	58032344	58032869	526	12	70.8	12.84
chr1	58046492	58047102	611	11	55.64	11.41
chr1	58058738	58059562	825	15	71.17	11.41
chr1	58060257	58060852	596	11	56.73	9.98
chr1	58061865	58062505	641	13	69.24	9.98
chr1	58073640	58074266	627	13	70.39	9.98
chr1	58127174	58128004	831	17	86.42	14.26
chr1	58134452	58135083	632	13	69.97	12.84
chr1	58146625	58147338	714	15	79.64	11.41
chr1	58167644	58168608	965	20	99.91	11.41
chr1	58184021	58184593	573	10	50.63	8.56
chr1	58217812	58218395	584	15	91.76	15.69
chr1	58218794	58220466	1673	42	222.32	15.69
chr1	58220946	58223332	2387	56	275.86	17.12
chr1	58225586	58226882	1297	31	162.85	14.26
chr1	58227229	58227992	764	13	60.3	11.41
chr1	58230739	58231519	781	15	66.64	11.41
chr1	58240601	58242076	1476	35	180.54	14.26
chr1	58268871	58271364	2494	69	379.03	18.54
chr1	58271740	58272327	588	12	57.32	11.41
chr1	58275892	58276399	508	10	55.49	9.98
chr1	58427694	58428779	1086	21	98.53	9.98
chr1	58429115	58430367	1253	27	133.25	14.26
chr1	58476845	58477409	565	10	51.19	9.98
chr1	58479756	58480362	607	11	55.93	11.41
chr1	58482429	58489892	7464	255	1553.13	31.38
chr1	58489936	58490527	592	11	57.02	8.56
chr1	58490608	58491455	848	18	93.17	9.98
chr1	58597329	58597889	561	10	51.48	8.56
chr1	58810690	58812773	2084	51	261.05	12.84
chr1	58813008	58816383	3376	112	681.74	24.25
chr1	59173936	59174528	593	11	56.95	12.84
chr1	59174972	59177211	2240	62	342.66	14.26
chr1	59177248	59178306	1059	29	168.91	14.26
chr1	59178458	59179021	564	10	51.27	8.56
chr1	59179219	59179737	519	10	54.62	9.98
chr1	59181108	59182087	980	19	90.82	14.26
chr1	59182899	59183587	689	12	57.84	8.56
chr1	59192516	59193051	536	12	69.87	12.84
chr1	60165386	60165890	505	12	72.8	11.41
chr1	60310036	60310569	534	10	53.46	9.98
chr1	60310652	60312684	2033	98	745.97	28.53
chr1	60312698	60313862	1165	36	222.53	15.69
chr1	60314162	60314979	818	14	64.15	11.41
chr1	62432442	62434023	1582	50	296.44	17.12
chr1	62434030	62434832	803	34	254.7	27.1
chr1	62435036	62435507	472	11	67.16	12.84
chr1	62554807	62558258	3452	116	711.17	24.25
chr1	63186894	63187974	1081	24	123.04	11.41
chr1	63188445	63189058	614	11	55.43	8.56
chr1	63189068	63189583	516	13	80.67	15.69
chr1	63190529	63191289	761	14	68.05	12.84
chr1	63238173	63238733	561	11	59.4	8.56
chr1	63238737	63239571	835	17	86.1	11.41
chr1	63240509	63241069	561	10	51.48	8.56
chr1	63266216	63266825	610	12	63.61	11.41
chr1	63307627	63308540	914	19	95.92	12.84
chr1	63309134	63314890	5757	193	1166.81	22.82
chr1	63439051	63439883	833	16	70.62	11.41
chr1	63460629	63461151	523	11	62.52	9.98
chr1	63461474	63462302	829	17	86.58	15.69
chr1	63507442	63508085	644	11	53.36	9.98
chr1	63514859	63515499	641	12	61.24	8.56
chr1	63532671	63533711	1041	23	118.17	11.41
chr1	63542609	63546307	3699	100	531.5	17.12
chr1	63547617	63548294	678	15	82.72	11.41
chr1	63550603	63551600	998	23	121.94	12.84
chr1	63552937	63553832	896	22	122.84	12.84
chr1	63553874	63555383	1510	42	239.04	14.26
chr1	63555619	63573616	17998	741	3100	32.81
chr1	63573805	63574339	535	10	53.39	8.56
chr1	63578935	63579765	831	15	70.75	11.41
chr1	63590199	63590672	474	10	58.33	11.41
chr1	63590702	63592508	1807	65	425.31	19.97
chr1	63592527	63593306	780	17	90.64	14.26
chr1	64010170	64011954	1785	53	310.23	19.97
chr1	64012853	64015107	2255	75	464.21	31.38
chr1	64705966	64707133	1168	21	92.76	9.98
chr1	64709218	64710435	1218	23	104.37	11.41
chr1	64710599	64711133	535	13	78.74	12.84
chr1	65384873	65385650	778	13	52.22	11.41
chr1	65548324	65549493	1170	23	107.86	14.26
chr1	65761733	65766819	5087	152	855.58	18.54
chr1	66028980	66034601	5622	256	1851.45	39.94
chr1	66391875	66392444	570	10	50.84	9.98
chr1	67387673	67388486	814	19	104.55	12.84
chr1	67388973	67389575	603	12	64.16	11.41
chr1	67403653	67407288	3636	92	467.36	19.97
chr1	67407385	67407965	581	13	74.37	11.41
chr1	67410119	67411675	1557	35	173.39	17.12
chr1	67411817	67414804	2988	73	365.14	18.54
chr1	67430956	67431507	552	12	68.44	12.84
chr1	67431543	67432187	645	20	132.03	17.12
chr1	67436328	67437100	773	13	52.51	12.84
chr1	68067341	68068323	983	31	187.06	24.25
chr1	68068524	68075962	7439	307	2094.31	29.95
chr1	68076540	68078652	2113	53	275.56	17.12
chr1	68078891	68079505	615	11	55.36	9.98
chr1	68079558	68080143	586	12	65.54	9.98
chr1	68080395	68081581	1187	21	91.5	9.98
chr1	68090091	68090579	489	10	57.05	9.98
chr1	68188958	68189304	347	10	74.78	14.26
chr1	68284102	68284744	643	16	94.72	11.41
chr1	68286425	68288253	1829	52	295.92	19.97
chr1	68289292	68289917	626	12	62.37	8.56
chr1	68445083	68445828	746	16	85.22	11.41
chr1	68448782	68449641	860	20	108.9	14.26
chr1	68450456	68451019	564	10	51.27	8.56
chr1	68466128	68466718	591	12	57.1	9.98
chr1	68467298	68473362	6065	216	1354.41	25.67
chr1	68473571	68474571	1001	21	105.09	9.98
chr1	68475195	68475925	731	14	70.24	12.84
chr1	69802361	69805018	2658	73	397.8	14.26
chr1	69805841	69808709	2869	110	722.55	39.94
chr1	69809441	69810076	636	12	61.61	9.98
chr1	69812239	69812920	682	11	50.89	11.41
chr1	71101025	71101934	910	19	96.25	12.84
chr1	71101940	71103338	1399	31	153.82	11.41
chr1	71106005	71106622	618	13	71.14	11.41
chr1	71215168	71216585	1418	33	168.84	12.84
chr1	71219008	71219606	599	12	64.48	11.41
chr1	71219915	71222236	2322	55	273.26	17.12
chr1	71281148	71281993	846	20	110.19	14.26
chr1	71282609	71283963	1355	31	157.62	11.41
chr1	71284469	71288016	3548	140	942.82	21.39
chr1	71288543	71289852	1310	38	224.32	15.69
chr1	74733272	74733824	553	10	52.05	8.56
chr1	74760189	74761030	842	17	85.54	11.41
chr1	74808794	74809818	1025	20	95.27	8.56
chr1	74810706	74812136	1431	28	127.35	11.41
chr1	75010629	75011407	779	16	74.51	11.41
chr1	75013082	75014079	998	32	194.87	17.12
chr1	75029612	75030190	579	11	58	8.56
chr1	75030246	75030771	526	10	54.07	11.41
chr1	75360073	75380884	20812	910	3100	29.95
chr1	75380946	75382899	1954	50	264.85	15.69
chr1	75382902	75384451	1550	55	360.04	19.97
chr1	75384721	75386207	1487	42	241.57	14.26
chr1	75386750	75387398	649	13	68.6	9.98
chr1	75390022	75390441	420	10	63.36	12.84
chr1	75401099	75402278	1180	24	114.97	8.56
chr1	75429039	75429611	573	10	50.63	8.56
chr1	75432229	75432892	664	14	67.42	9.98
chr1	75440561	75441127	567	11	58.92	9.98
chr1	75443930	75444549	620	14	79.4	11.41
chr1	75445013	75445799	787	13	58.81	9.98
chr1	75460682	75461301	620	12	62.83	9.98
chr1	75464309	75464875	567	10	51.05	9.98
[truncated: 46,652 more rows]

## Sheet: CD36_H3K4Me3_peaks
Chr	Start	End	Length	Tags	Pval(-10*LOG10)	Fold enrichment
chr1	703076	703974	899	26	348.01	148.97
chr1	704133	704622	490	17	250.28	117.61
chr1	751931	753173	1243	33	422.35	109.77
chr1	865356	865871	516	7	85.94	39.2
chr1	883602	884586	985	78	1331.74	250.9
chr1	885582	886438	857	9	93.99	39.2
chr1	892044	892539	496	5	59.74	23.52
chr1	938238	939194	957	43	641.2	203.85
chr1	945240	945895	656	7	77.94	31.36
chr1	1040278	1040863	586	5	55.61	23.52
chr1	1040953	1041445	493	20	303.92	133.29
chr1	1041619	1042112	494	6	73.33	23.52
chr1	1082918	1083686	769	15	184.72	62.72
chr1	1155839	1157496	1658	137	2339.55	352.82
chr1	1197532	1199893	2362	137	2129.38	258.74
chr1	1232170	1233079	910	19	233.53	78.4
chr1	1233298	1234922	1625	42	525.55	125.45
chr1	1249390	1251096	1707	67	943.54	172.49
chr1	1273354	1274569	1216	41	561.15	141.13
chr1	1274757	1275285	529	19	279.64	109.77
chr1	1299543	1301089	1547	85	1313.14	219.53
chr1	1323186	1326065	2880	210	3100	305.78
chr1	1331580	1334050	2471	154	2437.48	243.05
chr1	1396017	1398299	2283	81	1099.25	148.97
chr1	1436442	1438293	1852	79	1135.8	266.58
chr1	1498756	1500996	2241	186	3167.76	329.3
chr1	1539555	1540182	628	9	106.92	39.2
chr1	1540215	1542057	1843	77	1100.86	250.9
chr1	1580086	1580561	476	16	234.78	86.25
chr1	1613699	1614035	337	5	65.12	39.2
chr1	1644876	1645263	388	6	79.52	47.04
chr1	1645381	1645859	479	13	182.75	78.4
chr1	1666798	1667369	572	6	69.07	23.52
chr1	1698519	1700697	2179	109	1630.82	258.74
chr1	1810238	1813440	3203	99	1278.3	196.01
chr1	1829524	1831241	1718	36	421.35	109.77
chr1	1840015	1840666	652	7	78.15	47.04
chr1	2111003	2111550	548	10	127.63	47.04
chr1	2115868	2116665	798	14	167.24	54.88
chr1	2120411	2121259	849	30	424.03	196.01
chr1	2148259	2152947	4689	137	1724.81	196.01
chr1	2153772	2154416	645	6	65.59	23.52
chr1	2311604	2314241	2638	123	1798.91	250.9
chr1	2332962	2334867	1906	85	1236.18	188.17
chr1	2446280	2448072	1793	82	1202.55	266.58
chr1	2450009	2452194	2186	56	689.79	86.25
chr1	2467621	2469061	1441	25	279.44	86.25
chr1	2485868	2486877	1010	20	239.87	54.88
chr1	2506645	2507747	1103	25	308.72	78.4
chr1	2508038	2509128	1091	36	492.62	164.65
chr1	2563975	2564726	752	21	282.71	109.77
chr1	3437633	3438258	626	6	66.45	23.52
chr1	3530748	3531504	757	23	315.85	133.29
chr1	3531564	3532447	884	25	333.13	117.61
chr1	3555425	3556928	1504	42	539.67	133.29
chr1	3558694	3559235	542	5	57.54	31.36
chr1	3651623	3652239	617	7	79.98	39.2
chr1	3652303	3652712	410	6	78.8	31.36
chr1	3652740	3654189	1450	58	825.43	117.61
chr1	3678133	3681274	3142	125	1724.09	203.85
chr1	3701596	3703707	2112	131	2075.59	219.53
chr1	3762460	3764702	2243	136	2140.19	258.74
chr1	3804991	3807829	2839	147	2210.35	211.69
chr1	5974051	5975296	1246	37	488.49	125.45
chr1	5975328	5976703	1376	43	572.94	78.4
chr1	6008318	6010309	1992	38	427.95	117.61
chr1	6180580	6182897	2318	167	2745.24	344.98
chr1	6188220	6189194	975	11	114.06	31.36
chr1	6217362	6219028	1667	88	1343.1	274.42
chr1	6243479	6244202	724	8	87.61	31.36
chr1	6374820	6376900	2081	60	767.76	133.29
chr1	6407371	6408434	1064	15	162.93	39.2
chr1	6535802	6537564	1763	80	1171.24	243.05
chr1	6562412	6563641	1230	48	682.86	180.33
chr1	6582120	6582623	504	5	59.34	31.36
chr1	6582876	6586676	3801	220	3100	235.21
chr1	6595151	6596077	927	49	761.49	172.49
chr1	6596351	6597237	887	23	299.67	94.09
chr1	6597821	6598525	705	8	88.6	39.2
chr1	6607571	6608769	1199	65	1007.55	164.65
chr1	6682904	6684817	1914	142	2357.33	407.7
chr1	6766081	6768000	1920	79	1123.46	188.17
chr1	6768559	6769418	860	23	302.82	86.25
chr1	7662952	7663554	603	6	67.54	31.36
chr1	7753109	7755232	2124	112	1700.4	258.74
chr1	7809110	7810286	1177	12	117.16	39.2
chr1	7936226	7937639	1414	57	795.53	148.97
chr1	7943043	7945587	2545	161	2537.2	305.78
chr1	8008060	8009127	1068	12	122.37	39.2
chr1	8391718	8392543	826	8	82.71	39.2
chr1	8403959	8407185	3227	114	1533.08	188.17
chr1	8684585	8686708	2124	43	492.01	109.77
chr1	8798557	8801334	2778	100	1356.52	156.81
chr1	8858395	8858937	543	5	57.49	23.52
chr1	8859460	8861962	2503	115	1676.6	196.01
chr1	9111126	9111758	633	9	106.59	47.04
chr1	9163360	9166162	2803	139	2065.85	211.69
chr1	9216871	9218299	1429	51	703.93	109.77
chr1	9275470	9275781	312	5	79.52	39.2
chr1	9276027	9276754	728	11	128.65	47.04
chr1	9411134	9412290	1157	27	334.9	125.45
chr1	9522076	9523622	1547	84	1293.73	266.58
chr1	9571371	9572935	1565	70	1024.18	227.37
chr1	9669821	9670631	811	8	83.39	23.52
chr1	9805655	9807194	1540	59	828.11	141.13
chr1	9891990	9892928	939	29	393.56	125.45
chr1	9893236	9893886	651	21	296.23	125.45
chr1	9924847	9926788	1942	119	1882.14	235.21
chr1	10015525	10017325	1801	162	2819.95	415.55
chr1	10192589	10194367	1779	56	739.68	109.77
chr1	10380844	10383526	2683	207	3100	305.78
chr1	10412603	10414134	1532	76	1143.59	258.74
chr1	10453988	10455703	1716	88	1332.04	188.17
chr1	10457301	10458679	1379	96	1577.75	274.42
chr1	10676173	10677301	1129	21	244.89	78.4
chr1	10677448	10677948	501	5	59.49	23.52
chr1	10994487	10994924	438	7	91.44	47.04
chr1	10995042	10997096	2055	116	1794.23	266.58
chr1	11041219	11043880	2662	141	2135.26	235.21
chr1	11081354	11083025	1672	111	1796.34	337.14
chr1	11244039	11245861	1823	99	1519.28	235.21
chr1	11255638	11256965	1328	117	2035.52	297.94
chr1	11646939	11647626	688	7	76.37	31.36
chr1	11662921	11664138	1218	38	509.18	141.13
chr1	11664241	11664578	338	5	65.12	39.2
chr1	11718686	11720035	1350	72	1107.67	196.01
chr1	11784558	11786526	1969	105	1601.19	180.33
chr1	11787158	11790694	3537	220	3100	297.94
chr1	11890955	11891991	1037	21	252.76	78.4
chr1	11907391	11909428	2038	35	380.22	86.25
chr1	11916789	11918130	1342	53	753.8	133.29
chr1	11962493	11964414	1922	81	1159.56	250.9
chr1	12002013	12003097	1085	71	1155.99	235.21
chr1	12149567	12150593	1027	35	484.64	109.77
chr1	12212369	12213847	1479	84	1310.14	211.69
chr1	12332413	12333026	614	7	80.14	39.2
chr1	12333277	12333687	411	5	64.44	31.36
chr1	12599009	12600347	1339	18	187.4	54.88
chr1	12600424	12602247	1824	73	1031.6	141.13
chr1	13898668	13900541	1874	64	863.97	156.81
chr1	13947559	13949861	2303	78	1043.95	133.29
chr1	15122881	15124307	1427	13	118.82	39.2
chr1	15351620	15352046	427	6	77.6	39.2
chr1	15352774	15353450	677	9	103.78	39.2
chr1	15608376	15610464	2089	63	817.01	211.69
chr1	15610492	15610965	474	5	60.87	23.52
chr1	15722480	15723432	953	62	1011.83	344.98
chr1	15723624	15723994	371	23	401.3	180.33
chr1	15724245	15724804	560	22	328.46	148.97
chr1	15725776	15727075	1300	89	1458.57	235.21
chr1	15783551	15784372	822	8	82.89	31.36
chr1	15802073	15803069	997	49	745.88	196.01
chr1	15816250	15818263	2014	137	2223.95	274.42
chr1	15819541	15820224	684	6	63.9	31.36
chr1	15882948	15884866	1919	62	805.83	164.65
chr1	16032706	16035425	2720	130	1913.41	172.49
chr1	16036350	16036861	512	6	72.29	39.2
chr1	16045851	16049591	3741	225	3100	290.1
chr1	16174197	16175500	1304	50	706.3	141.13
chr1	16405772	16406485	714	8	88.12	31.36
chr1	16416190	16416581	392	5	65.12	39.2
chr1	16435459	16436311	853	24	320.28	117.61
chr1	16550029	16552177	2149	115	1752.44	211.69
chr1	16566294	16568248	1955	108	1662.57	243.05
chr1	16639423	16641046	1624	114	1871.62	250.9
chr1	16642913	16643415	503	5	59.39	23.52
chr1	16697588	16698938	1351	41	542.31	141.13
chr1	16713346	16713973	628	12	151.22	70.56
chr1	16811754	16813292	1539	82	1256.92	344.98
chr1	16842349	16844466	2118	190	3100	384.18
chr1	17088038	17088854	817	11	122.87	47.04
chr1	17103312	17104212	901	14	159.6	54.88
chr1	17113360	17113874	515	6	72.12	23.52
chr1	17159645	17160214	570	7	82.62	31.36
chr1	17210185	17211340	1156	30	383.3	78.4
chr1	17252057	17253369	1313	85	1373.75	274.42
chr1	17253419	17253629	211	5	125.93	39.2
chr1	17635808	17639529	3722	154	2165.17	219.53
chr1	19100682	19102610	1929	72	996.1	203.85
chr1	19108258	19110307	2050	54	672.6	109.77
chr1	19149372	19149977	606	7	80.58	31.36
chr1	19154557	19155876	1320	43	580.73	141.13
chr1	19407256	19410848	3593	238	3100	329.3
chr1	19449389	19452647	3259	216	3100	344.98
chr1	19510138	19512406	2269	63	794.52	133.29
chr1	19682909	19685732	2824	111	1544.55	203.85
chr1	19795417	19797743	2327	132	2040.13	243.05
chr1	19842517	19845275	2759	91	1202.76	125.45
chr1	19998270	19999746	1477	32	381.93	86.25
chr1	20081383	20082706	1324	91	1492.18	219.53
chr1	20384582	20385946	1365	44	591.58	148.97
chr1	20706287	20707784	1498	113	1890.81	344.98
chr1	20832248	20833687	1440	46	615.43	141.13
chr1	20859180	20861484	2305	158	2565.03	290.1
chr1	20895499	20896299	801	16	197.2	78.4
chr1	20984100	20987098	2999	221	3100	305.78
chr1	21374008	21375643	1636	59	812.61	125.45
chr1	21375712	21376426	715	17	221.33	78.4
chr1	21533165	21534331	1167	12	117.62	31.36
chr1	21543260	21545970	2711	107	1491.88	172.49
chr1	21638743	21640095	1353	48	662.91	141.13
chr1	21850068	21851001	934	11	116.19	47.04
chr1	21867276	21869038	1763	31	342.65	78.4
chr1	21980404	21982900	2497	208	3100	321.46
chr1	22134860	22136465	1606	38	463.39	125.45
chr1	22223633	22225633	2001	79	1109.32	227.37
chr1	22251408	22253393	1986	85	1221.04	188.17
chr1	22650814	22652307	1494	94	1504.21	313.62
chr1	23217540	23220427	2888	170	2645.35	258.74
chr1	23318134	23318912	779	9	97.94	47.04
chr1	23366528	23368753	2226	83	1143.49	196.01
chr1	23376573	23377228	656	9	105.09	39.2
chr1	23540754	23544224	3471	155	2229.96	219.53
chr1	23560928	23561499	572	5	56.21	31.36
chr1	23566354	23569422	3069	181	2815.9	274.42
chr1	23683118	23684188	1071	15	162.49	47.04
chr1	23727170	23727970	801	9	96.78	39.2
chr1	23728009	23730729	2721	122	1763.91	180.33
chr1	23758202	23758772	571	5	56.25	23.52
chr1	23890547	23892930	2384	192	3100	384.18
chr1	23941838	23944382	2545	143	2201.59	258.74
chr1	23976148	23976706	559	6	56.77	31.36
chr1	23976717	23978911	2195	162	2680.98	329.3
chr1	23979133	23979580	448	5	62.28	31.36
chr1	23989585	23990401	817	12	136.85	54.88
chr1	23990408	23991471	1064	41	585.1	172.49
chr1	23998534	24000665	2132	69	913.21	172.49
chr1	24023428	24025131	1704	119	1929.19	360.66
chr1	24066646	24067753	1108	26	324.05	109.77
chr1	24157850	24160620	2771	196	3200.53	258.74
chr1	24177057	24179593	2537	182	2985.44	258.74
chr1	24386209	24386706	498	6	73.1	39.2
chr1	24520794	24521423	630	8	92.81	31.36
chr1	24612007	24613129	1123	38	522.67	164.65
chr1	24614408	24616021	1614	76	1126.38	211.69
chr1	24701410	24702081	672	17	226.07	109.77
chr1	24840670	24844113	3444	203	3153.67	290.1
chr1	24944259	24946261	2003	100	1497.86	211.69
chr1	25047408	25047983	576	5	56.03	23.52
chr1	25127405	25129347	1943	67	905.94	133.29
chr1	25129439	25129969	531	5	58.05	31.36
chr1	25430479	25432628	2150	140	2245.43	258.74
chr1	25438476	25439794	1319	34	429.99	133.29
chr1	25444393	25447457	3065	194	3055.03	282.26
chr1	25535726	25536561	836	32	461.78	133.29
chr1	25537136	25539072	1937	88	1285.82	211.69
chr1	25617854	25618605	752	10	113.02	62.72
chr1	25619124	25620011	888	13	146.27	54.88
chr1	25628491	25629911	1421	96	1565.22	290.1
chr1	25630004	25632351	2348	135	2093.65	235.21
chr1	25742616	25744147	1532	54	740.77	141.13
chr1	25814808	25816007	1200	18	196.08	54.88
chr1	25816242	25816835	594	5	55.27	23.52
chr1	25998965	25999833	869	9	93.42	31.36
chr1	26018210	26020628	2419	136	2095.73	250.9
chr1	26057219	26059305	2087	96	1405.13	188.17
chr1	26074078	26075004	927	11	116.56	31.36
chr1	26103438	26105908	2471	87	1175.65	164.65
chr1	26121559	26122549	991	19	226.33	62.72
chr1	26196368	26197220	853	40	605.96	172.49
chr1	26234099	26235211	1113	36	489.47	109.77
chr1	26244682	26245096	415	5	64.2	31.36
chr1	26309467	26312191	2725	186	3010.28	290.1
chr1	26325638	26326134	497	7	87.2	39.2
chr1	26326367	26327061	695	11	130.98	54.88
chr1	26360915	26361445	531	6	71.23	39.2
chr1	26368631	26370141	1511	82	1263.47	290.1
chr1	26424205	26424996	792	10	110.65	31.36
chr1	26432856	26434612	1757	146	2494.59	305.78
chr1	26478627	26480234	1608	38	463.18	117.61
chr1	26504686	26505767	1082	60	938.3	250.9
chr1	26535008	26535796	789	12	138.75	54.88
chr1	26630605	26632384	1780	90	1356.09	337.14
chr1	26670446	26672197	1752	36	418.29	78.4
chr1	26672211	26673551	1341	55	790.22	235.21
chr1	26699147	26700869	1723	36	420.89	86.25
chr1	26728352	26730507	2156	106	1559.93	211.69
chr1	26744520	26746031	1512	63	905.28	196.01
chr1	26818899	26819711	813	22	291.9	133.29
chr1	26819795	26821166	1372	36	456.55	117.61
chr1	26891368	26892169	802	26	361.13	86.25
chr1	26894048	26897976	3929	174	2493.24	219.53
chr1	26898027	26898511	485	6	73.87	23.52
chr1	26899266	26899871	606	6	67.39	31.36
chr1	26985918	26988591	2674	93	1249.81	203.85
chr1	27025364	27026691	1328	26	303.4	94.09
chr1	27063460	27065058	1599	39	480.05	109.77
chr1	27088357	27090153	1797	114	1821.54	352.82
chr1	27098237	27100204	1968	150	2505.81	368.5
chr1	27120367	27122425	2059	109	1657.55	313.62
chr1	27192746	27193646	901	12	131.54	62.72
chr1	27353595	27354234	640	18	246.48	78.4
chr1	27433609	27435485	1877	63	846.17	227.37
chr1	27520919	27522566	1648	126	2091.08	376.34
chr1	27540776	27541703	928	11	116.51	54.88
chr1	27542018	27542738	721	14	158.51	62.72
chr1	27559557	27560254	698	7	75.89	47.04
chr1	27564774	27566047	1274	25	292.9	70.56
chr1	27591536	27592258	723	22	303.38	117.61
chr1	27687650	27689986	2337	120	1805.82	297.94
chr1	27727017	27727449	433	5	63.13	31.36
chr1	27767802	27768148	347	5	65.12	39.2
chr1	27802290	27803538	1249	42	573.68	148.97
chr1	27858895	27859564	670	10	118.33	39.2
chr1	27870967	27872080	1114	30	388.17	141.13
chr1	27924418	27924744	327	6	94.5	47.04
chr1	27924969	27926207	1239	57	846.42	156.81
chr1	27971734	27973335	1602	101	1614.75	274.42
chr1	28029204	28031630	2427	169	2752.8	329.3
chr1	28071350	28073163	1814	113	1796.91	235.21
chr1	28112778	28114105	1328	102	1717.94	274.42
chr1	28133943	28134746	804	11	123.67	39.2
chr1	28158581	28159892	1312	38	496.84	94.09
chr1	28286192	28288219	2028	198	3100	446.91
chr1	28431079	28432432	1354	97	1605.93	258.74
chr1	28434692	28436994	2303	168	2770.55	509.63
chr1	28445145	28446391	1247	32	405.57	94.09
chr1	28458125	28460160	2036	87	1248.46	188.17
chr1	28527723	28529085	1363	53	750.21	188.17
chr1	28568198	28569851	1654	73	1062.57	235.21
chr1	28637146	28638419	1274	40	535.67	94.09
chr1	28638472	28638958	487	5	60.2	31.36
chr1	28704106	28709385	5280	361	3100	384.18
chr1	28717069	28718766	1698	66	927.09	188.17
chr1	28752049	28753642	1594	93	1458.04	290.1
chr1	28778347	28779262	916	12	130.65	39.2
chr1	28779355	28782035	2681	224	3100	392.02
chr1	28840868	28843060	2193	139	2213.39	258.74
chr1	28847091	28847408	318	5	79.52	39.2
chr1	28867143	28867909	767	18	231.88	117.61
chr1	28868086	28869123	1038	59	929.53	180.33
chr1	28935237	28937590	2354	154	2449.67	282.26
chr1	28937725	28938323	599	7	80.96	39.2
chr1	28974163	28974862	700	13	160.25	70.56
chr1	29086112	29087605	1494	110	1829.9	243.05
chr1	29112828	29113968	1141	16	171.97	62.72
chr1	29320568	29321066	499	5	59.59	31.36
chr1	29323034	29323993	960	19	229.01	101.93
chr1	29378890	29381219	2330	171	2823.9	266.58
chr1	29381239	29381731	493	5	59.89	31.36
chr1	29428784	29430331	1548	94	1489.7	313.62
chr1	29435558	29436155	598	5	55.11	23.52
chr1	29436200	29436784	585	8	95.59	39.2
chr1	30963336	30963717	382	5	65.12	39.2
chr1	30963877	30965429	1553	33	390.31	109.77
chr1	30998791	30999877	1087	24	294.59	101.93
chr1	31000021	31004295	4275	319	3100	321.46
chr1	31069628	31070293	666	10	118.61	70.56
chr1	31308744	31311690	2947	174	2709.11	337.14
chr1	31400553	31401392	840	12	135.34	47.04
chr1	31540898	31543483	2586	268	3100	431.23
chr1	31590894	31591366	473	5	60.92	31.36
chr1	31591413	31592464	1052	24	298.05	109.77
chr1	31618662	31619254	593	5	55.32	23.52
chr1	31639966	31640556	591	9	109.46	62.72
chr1	31658245	31659577	1333	18	187.76	47.04
chr1	31881791	31883870	2080	121	1885.98	266.58
chr1	32026349	32027155	807	21	276.11	141.13
chr1	32174284	32177037	2754	157	2423.8	321.46
chr1	32182312	32182824	513	5	58.9	31.36
chr1	32182858	32183281	424	8	107.77	47.04
chr1	32251029	32251602	574	7	82.38	39.2
chr1	32251635	32253812	2178	181	3084.52	282.26
chr1	32310493	32312267	1775	67	932.19	211.69
chr1	32345841	32347480	1640	175	3173.21	360.66
chr1	32417453	32419489	2037	77	1067.49	180.33
chr1	32438476	32439204	729	13	157.86	70.56
chr1	32439237	32440593	1357	28	331.31	62.72
chr1	32443185	32444876	1692	77	1129.4	211.69
chr1	32459751	32461566	1816	144	2431.62	493.95
chr1	32478635	32479533	899	24	314.7	109.77
chr1	32479617	32480105	489	5	60.09	31.36
chr1	32529798	32531318	1521	76	1145.97	180.33
chr1	32573082	32574511	1430	27	309.87	78.4
chr1	32589176	32590458	1283	34	434.1	109.77
chr1	32631355	32633955	2601	129	1919.56	282.26
chr1	32738314	32739366	1053	31	412.37	117.61
chr1	32777230	32778725	1496	31	364.76	94.09
chr1	32850232	32851078	847	24	321.03	94.09
chr1	32887490	32887848	359	6	79.52	47.04
chr1	32888046	32889098	1053	88	1518.98	360.66
chr1	32889344	32890756	1413	109	1835.64	274.42
chr1	32890937	32891700	764	11	126.23	47.04
chr1	32979374	32981069	1696	45	566.34	125.45
chr1	32991801	32993820	2020	92	1343.89	258.74
chr1	33053462	33057021	3560	254	3100	392.02
chr1	33200235	33200950	716	9	101.44	54.88
chr1	33201833	33203491	1659	66	933.75	211.69
chr1	33273753	33275136	1384	77	1196.63	203.85
chr1	33318911	33319742	832	14	164.61	62.72
chr1	33364435	33366432	1998	108	1652.38	352.82
chr1	33419437	33420292	856	9	94.04	31.36
chr1	33493939	33496062	2124	49	584.71	125.45
chr1	33586227	33588935	2709	101	1385.07	156.81
chr1	33668468	33669299	832	13	150.09	47.04
chr1	33710407	33711738	1332	44	596.28	164.65
chr1	35096659	35098309	1651	146	2534.02	431.23
chr1	35103973	35104760	788	13	153.28	54.88
chr1	35222698	35224281	1584	72	1057.63	196.01
chr1	35268693	35270901	2209	128	1991.06	258.74
chr1	35316984	35318425	1442	70	1049.08	258.74
chr1	35358888	35359331	444	5	62.5	31.36
chr1	35428399	35432020	3622	251	3100	274.42
chr1	35506715	35508566	1852	65	884.71	164.65
chr1	35794581	35797045	2465	158	2519.13	266.58
chr1	35811225	35811780	556	12	157.91	78.4
chr1	35815261	35815851	591	6	55.4	31.36
chr1	35815901	35816305	405	6	79.16	39.2
chr1	35875356	35876897	1542	30	345.54	94.09
chr1	35878373	35880837	2465	125	1873	235.21
chr1	35956174	35957414	1241	60	902.41	156.81
chr1	36006706	36008589	1884	76	1075.39	211.69
chr1	36045599	36047635	2037	66	875.05	148.97
chr1	36120942	36122491	1550	60	844.35	172.49
chr1	36168101	36170694	2594	154	2405.11	219.53
chr1	36322253	36322848	596	9	109.11	47.04
chr1	36326705	36328079	1375	72	1101.92	196.01
chr1	36386777	36387798	1022	82	1403.07	305.78
chr1	36393600	36394133	534	16	226.44	94.09
chr1	36394275	36395972	1698	65	909.18	164.65
chr1	36398946	36399672	727	8	87.45	47.04
chr1	36461402	36464319	2918	162	2481.42	243.05
chr1	36544548	36545457	910	15	173.39	78.4
chr1	36622477	36625284	2808	89	1161.69	211.69
chr1	36635157	36636423	1267	109	1887.34	384.18
chr1	36639340	36639940	601	7	80.85	39.2
chr1	36688163	36689183	1021	30	399.66	125.45
chr1	36701342	36702955	1614	113	1854.2	258.74
chr1	37711790	37713740	1951	60	784.49	133.29
chr1	37713891	37714415	525	5	58.33	23.52
chr1	37751573	37753758	2186	75	1009.08	172.49
chr1	37791313	37792621	1309	101	1703.42	313.62
chr1	37832962	37834722	1761	126	2075.64	243.05
chr1	37927290	37931800	4511	237	3100	415.55
chr1	38032061	38032847	787	8	84.5	39.2
chr1	38045002	38047453	2452	155	2462.61	297.94
chr1	38096648	38098772	2125	139	2232.35	266.58
chr1	38168874	38170465	1592	68	982.14	235.21
chr1	38184396	38185595	1200	51	742.75	211.69
chr1	38226810	38228764	1955	141	2323.68	462.59
chr1	38233783	38234596	814	10	109.4	39.2
chr1	38241871	38244106	2236	127	1964.76	313.62
chr1	38250836	38252070	1235	132	2403.05	368.5
chr1	38285165	38285665	501	6	72.92	23.52
chr1	39042109	39042772	664	7	64.75	31.36
chr1	39097016	39099314	2299	135	2105.97	266.58
chr1	39110415	39112485	2071	127	2006.92	266.58
chr1	39228879	39231188	2310	111	1640.87	282.26
chr1	39264246	39265828	1583	138	2388.47	423.39
chr1	39319620	39320324	705	6	63.03	31.36
chr1	39343306	39344963	1658	67	952.01	141.13
chr1	39442755	39443320	566	5	56.47	23.52
chr1	39443437	39444561	1125	24	290.96	54.88
chr1	39444624	39445072	449	8	105.6	54.88
chr1	39453283	39454275	993	16	181.84	62.72
chr1	39646519	39648246	1728	67	939.98	148.97
chr1	39729585	39730092	508	5	59.15	23.52
chr1	39797387	39798022	636	36	578.11	196.01
chr1	39812569	39815331	2763	111	1536.98	227.37
chr1	39877703	39878304	602	14	185.09	86.25
chr1	39976798	39978207	1410	111	1878.52	439.07
chr1	40027286	40027949	664	10	118.75	47.04
chr1	40120435	40121916	1482	105	1730.65	274.42
chr1	40139307	40140946	1640	43	540.12	117.61
chr1	40193097	40194598	1502	39	490.65	125.45
chr1	40277725	40280233	2509	157	2487.06	344.98
chr1	40334413	40335873	1461	39	495.35	141.13
chr1	40399227	40401316	2090	143	2323.52	274.42
chr1	40494744	40497682	2939	243	3100	399.86
chr1	40553461	40554450	990	10	100.49	23.52
chr1	40554538	40555465	928	14	157.75	54.88
chr1	40611553	40614329	2777	184	2954.62	258.74
chr1	40622094	40623490	1397	24	268.17	62.72
chr1	40687870	40689329	1460	64	933.31	211.69
chr1	40714947	40716409	1463	57	805.17	125.45
chr1	40733102	40733996	895	9	92.2	39.2
chr1	40746373	40748149	1777	92	1394.99	196.01
chr1	40769255	40770839	1585	80	1208.2	227.37
chr1	40903265	40904639	1375	38	489.06	141.13
chr1	40929045	40931485	2441	105	1503.56	227.37
chr1	40947198	40948816	1619	35	415.07	101.93
chr1	41022096	41022690	595	6	67.92	39.2
chr1	41040139	41041040	902	10	104.72	31.36
chr1	41056584	41057338	755	6	61.07	31.36
chr1	41217636	41219554	1919	78	1105.48	180.33
chr1	41478943	41481147	2205	78	1058.6	203.85
chr1	41599051	41599960	910	14	158.97	94.09
chr1	42273620	42274807	1188	19	211.1	70.56
chr1	42571580	42574719	3140	183	2837.26	282.26
chr1	42618957	42619624	668	9	104.34	39.2
chr1	42693898	42696004	2107	128	2017.26	235.21
chr1	42700980	42702477	1498	64	926.16	243.05
chr1	42896199	42898040	1842	150	2548.85	360.66
chr1	42918824	42924534	5711	279	3100	297.94
chr1	43003426	43006720	3295	216	3100	266.58
chr1	43053986	43054625	640	6	65.81	31.36
chr1	43054784	43056271	1488	61	873.15	188.17
chr1	43063407	43066649	3243	162	2407.56	321.46
chr1	43083881	43085679	1799	61	805.56	164.65
chr1	43162283	43163379	1097	23	278.08	86.25
chr1	43164435	43164977	543	5	57.49	31.36
chr1	43193896	43194607	712	14	174.45	47.04
chr1	43194869	43198098	3230	194	3031.07	305.78
chr1	43409185	43410856	1672	103	1635.74	274.42
chr1	43587535	43588073	539	8	98.68	54.88
chr1	43596394	43599133	2740	112	1577.12	219.53
chr1	43604821	43607299	2479	88	1191.94	117.61
chr1	43627257	43629310	2054	136	2192.05	250.9
chr1	43692183	43692620	438	5	62.84	31.36
chr1	43768943	43769305	363	5	65.12	39.2
chr1	43803821	43804408	588	5	55.52	23.52
chr1	43887318	43889737	2420	106	1525.89	274.42
chr1	43944513	43947278	2766	147	2226.89	211.69
chr1	44174418	44175048	631	7	79.23	39.2
chr1	44183825	44186554	2730	125	1799.26	266.58
chr1	44207928	44209419	1492	89	1405.25	282.26
chr1	44212585	44214479	1895	123	1975.01	211.69
chr1	44216971	44217686	716	14	174.09	78.4
chr1	44217692	44218675	984	20	242.18	94.09
chr1	44218711	44219187	477	5	60.71	23.52
chr1	44229383	44230441	1059	14	149.48	47.04
chr1	44267721	44268605	885	21	267.51	101.93
chr1	44268611	44270169	1559	84	1290.91	250.9
chr1	44451151	44452440	1290	54	781.18	219.53
chr1	44592514	44593889	1376	41	539.03	133.29
chr1	44643356	44644403	1048	19	221.63	54.88
chr1	44645014	44645486	473	5	60.92	23.52
chr1	44647022	44647645	624	6	66.55	31.36
chr1	44655352	44655913	562	5	56.64	23.52
chr1	44662692	44663367	676	7	76.95	31.36
chr1	44869744	44870026	283	8	159.02	62.72
chr1	44870229	44871232	1004	45	669.2	180.33
chr1	44911756	44913572	1817	59	768.62	235.21
chr1	44977493	44979455	1963	164	2801.79	446.91
chr1	45013230	45016437	3208	229	3100	282.26
chr1	45016474	45017029	556	7	83.45	39.2
chr1	45024483	45025121	639	12	150.27	62.72
chr1	45037909	45039394	1486	49	660.54	188.17
chr1	45039907	45040470	564	5	56.55	23.52
chr1	45046482	45047193	712	8	88.23	39.2
chr1	45051724	45052536	813	12	137.12	62.72
chr1	45058400	45059142	743	13	142.02	78.4
chr1	45223602	45225284	1683	88	1339.45	235.21
chr1	45248442	45249772	1331	92	1510.49	227.37
chr1	45250121	45253748	3628	128	1717	266.58
chr1	45444288	45445046	759	17	216.78	86.25
chr1	45445063	45445373	311	5	79.52	39.2
chr1	45541246	45541852	607	6	54.74	31.36
chr1	45542084	45542718	635	49	842.85	282.26
chr1	45564820	45566971	2152	57	709.84	94.09
chr1	45577375	45580167	2793	171	2689.78	282.26
chr1	45728135	45730111	1977	94	1389.96	258.74
chr1	45737350	45739697	2348	105	1521.19	250.9
chr1	45758650	45760542	1893	97	1464.79	196.01
chr1	45788662	45790301	1640	92	1427.02	219.53
chr1	45821732	45824950	3219	187	2895.96	329.3
chr1	45923006	45927681	4676	299	3100	305.78
chr1	45988200	45989470	1271	85	1385.78	274.42
chr1	46041539	46043260	1722	62	852.05	180.33
chr1	46368735	46369914	1180	20	226.13	62.72
chr1	46369927	46371161	1235	43	593.22	125.45
chr1	46371220	46372249	1030	20	238.14	86.25
chr1	46436023	46437365	1343	58	844.78	156.81
chr1	46441307	46442013	707	14	174.89	47.04
chr1	46485173	46485776	604	25	375.39	148.97
chr1	46485891	46487347	1457	92	1474.3	243.05
chr1	46539244	46541618	2375	151	2403.67	235.21
chr1	46541894	46543657	1764	109	1730.61	329.3
chr1	46578176	46579968	1793	93	1410.56	266.58
chr1	46632229	46633081	853	14	163.04	47.04
chr1	46704588	46705259	672	14	178.11	70.56
chr1	46727280	46727817	538	6	70.85	31.36
chr1	46841679	46842978	1300	83	1337.16	392.02
chr1	46854085	46855511	1427	65	958.28	148.97
chr1	46905289	46906941	1653	97	1521.83	250.9
chr1	46956443	46958107	1665	83	1247.89	188.17
chr1	47417268	47418100	833	16	179.33	78.4
chr1	47418274	47418537	264	5	94.5	39.2
chr1	47462676	47471035	8360	645	3100	431.23
chr1	47550882	47553207	2326	126	1923.71	344.98
chr1	47571418	47573806	2389	127	1928.39	203.85
chr1	47670844	47671403	560	6	69.68	39.2
chr1	47674946	47676615	1670	31	349.93	94.09
chr1	47947662	47948135	474	5	60.87	23.52
chr1	48709906	48711065	1160	27	334.6	78.4
chr1	51196996	51199343	2348	138	2152.58	282.26
chr1	51206384	51210056	3673	270	3100	337.14
chr1	51210105	51210679	575	14	188.01	70.56
chr1	51215128	51217145	2018	73	999.64	117.61
chr1	51474186	51476458	2273	124	1897.46	266.58
chr1	51568870	51569309	440	6	76.72	39.2
chr1	51754282	51757774	3493	245	3100	337.14
chr1	51757781	51759810	2030	31	323.77	62.72
chr1	51855318	51856200	883	90	1630.69	274.42
chr1	51966914	51969186	2273	128	1975.23	329.3
chr1	52113810	52114543	734	10	114.14	31.36
chr1	52114577	52115144	568	5	56.38	23.52
chr1	52115485	52117961	2477	224	3100	407.7
chr1	52269985	52272346	2362	202	3100	478.27
chr1	52292393	52296076	3684	339	3100	368.5
chr1	52379820	52381480	1661	84	1267.8	188.17
chr1	52603463	52604899	1437	56	791.6	164.65
chr1	52606570	52607115	546	6	70.42	31.36
chr1	52640882	52644055	3174	290	3100	431.23
chr1	52790160	52792266	2107	99	1457.19	227.37
chr1	52840594	52841176	583	6	68.51	39.2
chr1	52935589	52936962	1374	53	748.36	196.01
chr1	52941329	52941861	533	7	84.86	39.2
chr1	52964380	52965987	1608	68	979.19	211.69
chr1	53159407	53160256	850	18	223.62	78.4
chr1	53165181	53166331	1151	22	258.07	62.72
chr1	53252509	53254217	1709	98	1527.39	266.58
chr1	53434586	53435954	1369	76	1180.77	243.05
chr1	53457991	53459400	1410	74	1132.41	156.81
chr1	53475877	53477588	1712	120	1947.2	337.14
chr1	53563587	53564569	983	15	168.22	47.04
chr1	53564641	53566438	1798	90	1352.17	180.33
chr1	53977564	53977881	318	5	79.52	39.2
chr1	54075494	54077197	1704	132	2218.4	282.26
chr1	54127127	54128656	1530	68	993.88	250.9
chr1	54182912	54184073	1162	75	1214.86	227.37
chr1	54184290	54185388	1099	35	474.24	172.49
chr1	54289737	54293251	3515	260	3100	431.23
chr1	54437339	54440213	2875	211	3100	360.66
chr1	54467909	54468906	998	11	112.9	39.2
chr1	54643188	54644029	842	32	460.77	125.45
chr1	54644232	54645202	971	16	183.43	54.88
chr1	54645256	54646151	896	12	131.84	47.04
chr1	54726686	54728060	1375	19	198.9	47.04
chr1	54780389	54781013	625	10	121.54	54.88
chr1	54953754	54955291	1538	86	1334.77	282.26
chr1	55001874	55003393	1520	82	1261.35	305.78
chr1	55123608	55126628	3021	124	1726.95	211.69
chr1	55277401	55280333	2933	228	3100	266.58
chr1	55449434	55454657	5224	325	3100	305.78
chr1	56816403	56818004	1602	47	610.83	125.45
chr1	58783768	58785420	1653	89	1365.64	266.58
chr1	58936825	58938701	1877	139	2307.12	392.02
chr1	59020990	59023444	2455	50	569.29	86.25
chr1	59053419	59053926	508	5	59.15	23.52
chr1	59054247	59055036	790	8	84.36	47.04
chr1	59141693	59142555	863	14	147.94	54.88
chr1	59384755	59385375	621	9	107.39	47.04
chr1	59534381	59536227	1847	65	885.47	141.13
chr1	60052446	60053015	570	10	125.8	54.88
chr1	60053201	60054036	836	10	108.18	31.36
chr1	60164625	60165316	692	11	131.2	47.04
chr1	61288361	61289828	1468	40	510.96	101.93
chr1	61291293	61292686	1394	36	454.06	101.93
chr1	61294711	61296183	1473	55	767.74	203.85
chr1	61314704	61316375	1672	69	985.84	164.65
chr1	61319798	61324747	4950	260	3100	258.74
chr1	61961960	61962430	471	5	61.03	31.36
chr1	61962580	61964115	1536	130	2235.27	344.98
chr1	62673687	62674724	1038	72	1169.71	329.3
chr1	62674865	62677549	2685	195	3206.66	243.05
chr1	62925380	62927771	2392	103	1475.96	156.81
chr1	62927812	62928342	531	5	58.05	23.52
chr1	63021739	63023653	1915	114	1790.1	290.1
chr1	63560233	63560999	767	9	98.58	39.2
chr1	63605493	63606742	1250	103	1765.96	329.3
chr1	63760405	63762690	2286	149	2388.3	266.58
chr1	63831155	63832874	1720	49	629.42	109.77
chr1	64708056	64709681	1626	27	294.78	47.04
chr1	64982560	64984658	2099	65	849.5	125.45
chr1	65203267	65205444	2178	88	1241.15	211.69
chr1	65240622	65241797	1176	30	381.04	94.09
chr1	65303987	65307600	3614	165	2387.55	196.01
chr1	65385463	65388110	2648	63	752.62	101.93
chr1	65492079	65495463	3385	244	3100	329.3
chr1	65503638	65504289	652	7	78.15	31.36
chr1	65546845	65548622	1778	24	243	54.88
chr1	65658055	65658605	551	9	112.41	47.04
chr1	65658844	65660938	2095	187	3100	329.3
chr1	65661094	65661427	334	5	65.12	39.2
chr1	65716966	65719400	2435	59	711.16	94.09
chr1	65763340	65766659	3320	170	2543.02	203.85
chr1	66990164	66991254	1091	23	263.25	78.4
chr1	67162028	67165810	3783	189	2803.6	321.46
chr1	67166775	67167369	595	5	55.23	23.52
chr1	67167656	67170260	2605	126	1861.99	282.26
chr1	67219618	67220121	504	5	59.34	23.52
chr1	67291097	67293241	2145	110	1657.33	188.17
chr1	67373011	67373464	454	6	75.8	39.2
chr1	67545559	67546035	477	9	118.48	47.04
chr1	67665070	67669837	4768	413	3100	376.34
chr1	67923388	67927300	3913	268	3100	266.58
chr1	68733729	68736268	2540	178	2902.54	360.66
chr1	69805181	69807031	1851	40	470.71	62.72
chr1	70442262	70445224	2963	217	3100	297.94
chr1	70459138	70461676	2539	171	2760.3	376.34
chr1	70590807	70593962	3156	183	2833.25	321.46
chr1	70648465	70650548	2084	106	1594.43	172.49
chr1	71283629	71284183	555	6	69.94	23.52
chr1	71284448	71286513	2066	42	481.91	62.72
chr1	71317102	71320119	3018	178	2769.81	274.42
chr1	72520102	72522926	2825	66	782.04	109.77
chr1	74435981	74437909	1929	108	1668.83	243.05
chr1	74970548	74972573	2026	143	2342.79	399.86
chr1	75961938	75964474	2537	140	2145.14	297.94
chr1	76024136	76028450	4315	306	3100	297.94
chr1	76312600	76313606	1007	14	152.63	70.56
chr1	77456620	77458714	2095	125	1960.98	321.46
chr1	77519974	77520544	571	5	56.25	23.52
chr1	77918752	77919296	545	5	57.4	23.52
chr1	77919468	77922446	2979	155	2332.16	360.66
chr1	77996712	77998475	1764	130	2157.15	329.3
chr1	78017789	78019015	1227	68	1059.19	250.9
chr1	78126471	78127935	1465	47	629.09	148.97
chr1	78214299	78215214	916	16	187.6	62.72
chr1	78215730	78219425	3696	286	3100	313.62
chr1	78242261	78242666	406	5	64.75	31.36
chr1	78242749	78244892	2144	104	1543.58	227.37
chr1	78245065	78245657	593	10	123.97	47.04
chr1	78283789	78284994	1206	33	426.71	101.93
chr1	78319062	78319417	356	5	65.12	39.2
chr1	84098813	84099576	764	14	155.1	62.72
chr1	84236772	84237994	1223	27	328.34	94.09
chr1	84315120	84317665	2546	158	2497.03	321.46
chr1	84382609	84385065	2457	60	724.78	109.77
chr1	84536304	84538005	1702	90	1373.59	250.9
chr1	84540135	84540551	417	5	64.08	31.36
chr1	84717092	84718905	1814	133	2203.21	376.34
chr1	84742521	84746010	3490	216	3100	321.46
chr1	84811766	84813282	1517	61	868.03	188.17
chr1	84858872	84859447	576	30	475.53	196.01
chr1	84925297	84929805	4509	200	2862.42	227.37
chr1	85183456	85183840	385	5	65.12	39.2
chr1	85235153	85236021	869	12	133.5	47.04
chr1	85300180	85300460	281	6	109.99	47.04
chr1	85438008	85440633	2626	132	1971.13	196.01
chr1	85496693	85498343	1651	79	1175.16	274.42
chr1	85513388	85515626	2239	138	2180.98	360.66
chr1	85702474	85703584	1111	17	187.91	47.04
chr1	85814457	85815979	1523	29	332.12	78.4
chr1	85818326	85820091	1766	33	371.9	86.25
chr1	85945088	85947218	2131	134	2130.32	274.42
chr1	86394263	86395141	879	11	119.21	39.2
chr1	86633596	86635168	1573	80	1210.84	274.42
chr1	86741871	86742468	598	6	67.78	23.52
chr1	86941806	86944793	2988	132	1897.53	203.85
chr1	87150823	87152715	1893	145	2426.51	376.34
chr1	87152870	87154573	1704	122	2011.13	219.53
chr1	87369936	87370591	656	6	65.1	31.36
chr1	87565961	87569251	3291	88	1084.65	133.29
chr1	87569286	87569988	703	13	160	54.88
chr1	87569995	87570821	827	12	136.19	47.04
chr1	87572974	87574213	1240	23	265.69	101.93
chr1	88700659	88701225	567	5	56.42	31.36
chr1	88921117	88924647	3531	203	3131.81	250.9
chr1	89128493	89130561	2069	142	2309.39	368.5
chr1	89229520	89232185	2666	106	1481.58	211.69
chr1	89308109	89308773	665	8	90.78	39.2
chr1	89436509	89437567	1059	14	149.48	39.2
chr1	89762229	89764517	2289	107	1570.09	329.3
chr1	89870695	89873167	2473	178	2923.13	305.78
chr1	90000663	90001811	1149	15	157.81	54.88
chr1	90058644	90060272	1629	47	607.41	101.93
chr1	90081157	90082787	1631	107	1727.25	305.78
chr1	90232729	90235108	2380	136	2105.29	250.9
chr1	90260387	90260905	519	8	100.11	39.2
chr1	90261094	90261568	475	5	60.82	31.36
chr1	90261688	90262101	414	6	78.51	31.36
chr1	91088586	91089902	1317	26	304.35	94.09
chr1	91258333	91260527	2195	128	1994.58	274.42
chr1	91625198	91625880	683	39	625.34	203.85
chr1	91641818	91643080	1263	41	554.36	125.45
chr1	91738301	91741450	3150	130	1831.09	172.49
chr1	92123453	92124598	1146	22	258.49	94.09
chr1	92267966	92268557	592	5	55.36	23.52
chr1	92317974	92319613	1640	89	1368.69	313.62
chr1	92536024	92537989	1966	137	2238.27	313.62
chr1	92723483	92724466	984	12	126.78	39.2
chr1	92724819	92725270	452	6	75.93	39.2
chr1	93022131	93023915	1785	85	1260.34	188.17
chr1	93069840	93071986	2147	198	3100	376.34
chr1	93072561	93072905	345	5	65.12	39.2
chr1	93199430	93200595	1166	33	431.59	109.77
chr1	93316517	93320034	3518	198	3037.31	250.9
chr1	93415988	93417341	1354	27	316.31	70.56
chr1	93417450	93419943	2494	172	2793.9	274.42
chr1	93420414	93420962	549	5	57.22	31.36
chr1	93583037	93587895	4859	366	3100	282.26
chr1	93685245	93686049	805	8	83.66	23.52
chr1	93686164	93687576	1413	31	372.47	78.4
chr1	93919571	93920302	732	18	235.64	78.4
chr1	94084143	94086453	2311	110	1621.85	188.17
chr1	94116341	94117872	1532	138	2408.1	360.66
chr1	94145193	94148595	3403	166	2449.2	313.62
chr1	94475090	94476013	924	12	130.18	39.2
chr1	94485288	94486254	967	10	101.56	31.36
chr1	94655443	94658108	2666	128	1886.96	211.69
chr1	94778888	94780492	1605	44	560.58	117.61
chr1	95092657	95093208	552	10	127.29	70.56
chr1	95163911	95165366	1456	47	630.35	133.29
chr1	95310148	95311600	1453	92	1475.4	329.3
chr1	95354796	95357877	3082	166	2520.18	250.9
chr1	95471893	95473147	1255	68	1052.5	243.05
chr1	96959375	96962136	2762	148	2247.09	219.53
chr1	98157802	98160020	2219	77	1038.99	196.01
chr1	98291925	98292478	554	6	69.99	23.52
chr1	100002031	100003858	1828	55	716.19	133.29
chr1	100003967	100005144	1178	80	1311.48	305.78
chr1	100087701	100089527	1827	108	1694.27	250.9
chr1	100207258	100209098	1841	107	1671.02	243.05
chr1	100274664	100278528	3865	288	3100	337.14
chr1	100369512	100372678	3167	222	3100	321.46
chr1	100486943	100488481	1539	116	1939.73	376.34
chr1	100503287	100505424	2138	130	2048.78	321.46
chr1	100589230	100592685	3456	226	3100	290.1
chr1	100777302	100778396	1095	11	108.31	31.36
chr1	101131701	101135657	3957	219	3100	290.1
chr1	101262882	101264941	2060	140	2271.37	282.26
chr1	103840184	103840779	596	5	55.19	23.52
chr1	103840848	103842974	2127	101	1490.62	235.21
chr1	107400483	107403062	2580	183	2992.69	321.46
chr1	108307536	108310248	2713	117	1673.23	148.97
chr1	108543716	108544953	1238	23	265.85	62.72
chr1	108877750	108878160	411	5	64.44	31.36
chr1	108903421	108904074	654	7	78.05	31.36
chr1	108904294	108906316	2023	93	1361.92	243.05
chr1	109004979	109005766	788	18	229.7	78.4
chr1	109035137	109039233	4097	344	3100	305.78
chr1	109039525	109040064	540	5	57.63	23.52
chr1	109090611	109091878	1268	81	1305.89	250.9
chr1	109220654	109222710	2057	105	1581.3	148.97
chr1	109306434	109308020	1587	65	928.25	211.69
chr1	109384585	109386958	2374	99	1406.1	211.69
chr1	109419043	109420530	1488	111	1852.54	360.66
chr1	109434216	109436579	2364	108	1573.76	258.74
chr1	109444160	109445450	1291	98	1646.84	321.46
chr1	109445681	109446185	505	6	72.69	31.36
chr1	109557637	109559835	2199	145	2332.34	258.74
chr1	109593546	109594472	927	10	103.47	39.2
chr1	109626246	109628043	1798	77	1109.11	172.49
chr1	109741538	109742812	1275	15	150.9	47.04
chr1	109769071	109771881	2811	197	3208.81	329.3
chr1	109827349	109829073	1725	44	546.81	101.93
chr1	109837878	109838895	1018	41	593.03	219.53
chr1	109853467	109854224	758	16	201.16	54.88
chr1	109891535	109893960	2426	166	2691.95	344.98
chr1	109963338	109963898	561	5	56.69	31.36
chr1	109963921	109966276	2356	101	1445.95	188.17
chr1	109967691	109968188	498	6	73.1	31.36
chr1	109968350	109968913	564	8	96.97	54.88
chr1	109999727	110000927	1201	63	968.44	219.53
chr1	110083805	110084981	1177	26	317.15	54.88
chr1	110254271	110256827	2557	144	2218.17	258.74
chr1	110328761	110330474	1714	84	1256.35	211.69
chr1	110378294	110380089	1796	106	1662.76	219.53
chr1	110428564	110429176	613	15	200.07	94.09
chr1	110554256	110555027	772	13	154.48	54.88
chr1	110681335	110683051	1717	80	1180.42	156.81
chr1	110683487	110685052	1566	127	2139.83	274.42
chr1	110686715	110687315	601	7	80.85	39.2
chr1	110750965	110752615	1651	106	1701.48	321.46
chr1	111217187	111218527	1341	20	214.89	47.04
chr1	111260895	111261483	589	5	55.48	23.52
chr1	111306194	111307286	1093	17	189.14	62.72
chr1	111307404	111309211	1808	75	1070.71	141.13
chr1	111483072	111485943	2872	235	3100	384.18
chr1	111547435	111548070	636	9	106.39	31.36
chr1	111548212	111548960	749	14	156.26	70.56
chr1	111690176	111690786	611	15	184.15	78.4
chr1	111791696	111795008	3313	226	3100	399.86
chr1	111859725	111860303	579	5	55.9	23.52
chr1	111963914	111965815	1902	102	1558.82	196.01
chr1	111965833	111966236	404	6	79.23	39.2
chr1	112082392	112084431	2040	43	499.5	70.56
chr1	112084596	112084962	367	5	65.12	39.2
chr1	112099046	112101336	2291	135	2108	290.1
chr1	112739788	112741123	1336	57	827.7	227.37
chr1	112810451	112810731	281	8	159.02	62.72
chr1	112845845	112846694	850	10	107.42	31.36
chr1	112961736	112965510	3775	220	3100	290.1
chr1	112965623	112965998	376	8	109.99	62.72
chr1	112966305	112966729	425	5	63.6	23.52
chr1	113018195	113020145	1951	93	1376.52	219.53
chr1	113050510	113051573	1064	18	205.65	70.56
chr1	113059680	113060108	429	7	92.14	47.04
chr1	113193796	113194377	582	5	55.78	31.36
chr1	113298090	113301421	3332	194	3005.02	282.26
chr1	113416624	113418706	2083	148	2427.8	360.66
chr1	113733655	113736216	2562	100	1391.43	180.33
chr1	114101699	114104270	2572	120	1756.12	196.01
chr1	114153574	114156652	3079	214	3100	517.47
chr1	114156655	114157082	428	7	77.53	47.04
chr1	114215326	114215932	607	7	80.52	39.2
chr1	114248037	114250368	2332	199	3100	384.18
chr1	114272141	114276063	3923	260	3100	321.46
chr1	114382024	114382536	513	11	146.34	78.4
chr1	114853670	114856423	2754	140	2095.48	211.69
chr1	114924757	114926527	1771	89	1339.01	360.66
chr1	115013631	115014782	1152	41	570.84	133.29
chr1	115059631	115061595	1965	79	1115.53	203.85
chr1	115099905	115102597	2693	152	2341.09	305.78
chr1	115123475	115125207	1733	128	2105.04	384.18
chr1	115433723	115434272	550	9	112.48	47.04
chr1	115442740	115443691	952	18	214.53	54.88
chr1	115985750	115987745	1996	97	1442.52	188.17
chr1	116172313	116172904	592	8	95.15	47.04
chr1	116319673	116321096	1424	26	295.47	70.56
chr1	116496104	116496820	717	11	129.42	70.56
chr1	116716776	116719072	2297	78	1044.82	125.45
chr1	116761812	116763293	1482	81	1250.93	313.62
chr1	116912880	116913453	574	5	56.12	23.52
chr1	116913531	116915277	1747	121	1977.5	266.58
chr1	117011001	117012101	1101	16	174.5	62.72
chr1	117254246	117255018	773	11	125.64	47.04
chr1	117402542	117405253	2712	143	2162.3	235.21
chr1	117405563	117406158	596	5	55.19	31.36
chr1	117465393	117466601	1209	47	668.43	219.53
chr1	117710296	117714595	4300	170	2353.63	219.53
chr1	117949313	117953368	4056	298	3100	376.34
chr1	118079073	118079711	639	6	65.86	31.36
chr1	118272554	118274928	2375	234	3100	399.86
chr1	118529028	118530023	996	25	319.96	101.93
chr1	119483480	119485610	2131	93	1340.98	211.69
chr1	119991371	119993127	1757	93	1418.74	211.69
chr1	120055991	120056847	857	18	222.96	70.56
chr1	120412713	120413887	1175	27	333.08	78.4
chr1	120639260	120639864	605	8	94.33	39.2
chr1	120640511	120641067	557	8	97.44	54.88
chr1	120641203	120641457	255	6	125.93	47.04
chr1	120839716	120840493	778	10	111.47	39.2
chr1	120962086	120963068	983	21	257.73	109.77
chr1	121184702	121185267	566	5	56.47	23.52
chr1	121185694	121187131	1438	196	3100	423.39
chr1	141480520	141480977	458	5	61.73	23.52
chr1	141831644	141832619	976	79	1355.95	305.78
chr1	142308099	142309465	1367	52	731.61	203.85
chr1	142534601	142535878	1278	26	307.77	101.93
chr1	143051254	143051658	405	8	109.52	54.88
chr1	143231311	143231531	221	5	125.93	39.2
chr1	143231796	143232726	931	13	143.51	39.2
chr1	143244516	143245654	1139	16	172.09	54.88
chr1	143304655	143305411	757	13	155.64	78.4
chr1	143305453	143305991	539	8	98.68	54.88
chr1	143642435	143644438	2004	151	2514.77	290.1
chr1	143720573	143720982	410	6	78.8	39.2
chr1	143750665	143751676	1012	56	877.24	188.17
chr1	143786570	143787427	858	23	303.06	94.09
chr1	143802105	143802543	439	5	62.79	31.36
chr1	143807691	143810187	2497	185	3059.92	486.11
chr1	143810440	143810996	557	5	56.86	23.52
chr1	143850480	143851021	542	5	57.54	31.36
chr1	143920113	143921482	1370	33	408.33	109.77
chr1	144093285	144094130	846	8	81.82	39.2
chr1	144106804	144107865	1062	67	1081.93	196.01
chr1	144107913	144110962	3050	107	1437.55	164.65
chr1	144148968	144153651	4684	382	3100	399.86
chr1	144180831	144182309	1479	91	1448.37	266.58
chr1	144183418	144183980	563	5	56.6	23.52
chr1	144184379	144186391	2013	60	776.37	141.13
chr1	144187744	144189572	1829	62	835.85	211.69
chr1	144218113	144220416	2304	123	1870.89	250.9
chr1	144226487	144228738	2252	126	1941.34	266.58
chr1	144260242	144260760	519	12	161.7	86.25
chr1	144286253	144288031	1779	87	1299.33	219.53
chr1	144300239	144301241	1003	26	335.45	86.25
chr1	144321225	144322988	1764	138	2323.61	384.18
chr1	144536848	144538461	1614	33	384.78	94.09
chr1	145010742	145011337	596	6	67.87	39.2
chr1	145022510	145023595	1086	14	147.91	47.04
chr1	145109238	145112002	2765	175	2777.05	344.98
chr1	145163313	145164200	888	28	366.36	109.77
chr1	145180709	145183268	2560	185	3039.96	392.02
chr1	145479691	145480279	589	5	55.48	23.52
chr1	145537508	145539404	1897	31	332.83	62.72
chr1	145608309	145609380	1072	56	863.15	211.69
chr1	145867095	145869094	2000	41	472.51	156.81
chr1	146202170	146203236	1067	18	205.43	54.88
chr1	146256913	146257562	650	7	78.25	31.36
chr1	146272389	146272954	566	5	56.47	23.52
chr1	146273005	146274257	1253	45	625.62	141.13
chr1	146466643	146467636	994	17	196.31	94.09
chr1	146542775	146543591	817	17	211.17	70.56
chr1	146614205	146614666	462	5	61.51	23.52
chr1	146822364	146823614	1251	19	206.78	54.88
chr1	147489672	147490533	862	8	81.13	39.2
chr1	147490871	147491564	694	11	131.06	62.72
chr1	147565278	147566418	1141	18	200.09	62.72
chr1	148051293	148051652	360	6	79.52	47.04
chr1	148081579	148082428	850	58	960.65	250.9
chr1	148082668	148083232	565	7	82.91	31.36
chr1	148087370	148088681	1312	52	740.92	180.33
chr1	148122504	148122935	432	5	63.19	31.36
chr1	148123396	148124845	1450	55	771.51	156.81
chr1	148125049	148126656	1608	57	781.76	117.61
chr1	148126748	148127254	507	10	131.24	62.72
chr1	148137603	148138384	782	32	471.2	164.65
chr1	148164935	148167163	2229	112	1677.01	297.94
chr1	148247845	148249707	1863	123	1984.09	266.58
chr1	148305118	148307419	2302	112	1661.4	180.33
chr1	148388687	148389246	560	5	56.73	31.36
chr1	148452708	148453205	498	5	59.64	23.52
chr1	148473055	148476196	3142	179	2758.38	274.42
chr1	148506605	148508750	2146	130	2046.68	290.1
chr1	148520614	148521139	526	5	58.28	31.36
chr1	148521181	148521730	550	6	70.2	39.2
chr1	148531903	148533822	1920	119	1888.01	376.34
chr1	148559910	148561785	1876	112	1760.65	274.42
chr1	148602603	148606255	3653	236	3100	282.26
chr1	148725842	148727351	1510	94	1499.85	321.46
chr1	148754104	148755416	1313	56	813.6	203.85
chr1	148787824	148788520	697	11	130.84	54.88
chr1	148799978	148801573	1596	32	371.15	101.93
chr1	148815417	148819529	4113	299	3100	392.02
chr1	148867263	148869706	2444	118	1744.83	258.74
chr1	148935180	148937183	2004	79	1108.81	250.9
chr1	149004081	149004865	785	7	72.02	31.36
chr1	149114417	149116418	2002	73	1002.16	148.97
chr1	149164805	149166277	1473	55	767.74	141.13
chr1	149212114	149214743	2630	178	2875.72	352.82
chr1	149215016	149216860	1845	41	486.8	70.56
chr1	149218448	149218733	286	7	125.93	54.88
chr1	149244604	149246328	1725	41	498.75	133.29
chr1	149247527	149248389	863	54	876.03	196.01
chr1	149286489	149287734	1246	49	698.14	117.61
chr1	149296883	149299918	3036	198	3163.33	290.1
chr1	149309224	149310616	1393	61	890.66	180.33
chr1	149370282	149370742	461	5	61.57	31.36
chr1	149384962	149386382	1421	35	434.93	117.61
chr1	149395475	149397129	1655	36	427.18	117.61
chr1	149403914	149404510	597	5	55.15	31.36
chr1	149404577	149406122	1546	129	2210.37	344.98
chr1	149428101	149429599	1499	137	2399.53	313.62
chr1	149437007	149439055	2049	97	1431.51	203.85
chr1	149493441	149495003	1563	105	1706.38	266.58
chr1	149520447	149522912	2466	144	2240.74	313.62
chr1	149565210	149566837	1628	47	607.54	109.77
chr1	149566905	149567538	634	20	281.35	101.93
chr1	149585129	149586933	1805	49	619.18	164.65
chr1	149610661	149611880	1220	25	282.41	62.72
chr1	149638057	149639971	1915	104	1594.46	258.74
chr1	149696035	149696537	503	5	59.39	31.36
chr1	149696717	149698671	1955	52	650.86	101.93
chr1	149712253	149712996	744	7	73.79	39.2
chr1	149749884	149751313	1430	19	195.64	54.88
chr1	149779035	149780661	1627	62	849.48	188.17
chr1	149851071	149852282	1212	60	908.6	164.65
chr1	150001555	150003516	1962	113	1758.49	203.85
chr1	150028951	150031169	2219	114	1717.35	274.42
chr1	150077255	150077848	594	6	67.97	31.36
chr1	150078400	150078964	565	5	56.51	31.36
chr1	150147468	150149490	2023	76	1051.97	196.01
chr1	150231784	150233368	1585	51	663.84	94.09
chr1	150275078	150276130	1053	30	395.59	94.09
chr1	150349228	150350079	852	11	120.77	54.88
chr1	150427882	150428721	840	15	178.77	54.88
chr1	151772672	151775640	2969	262	3100	392.02
chr1	151782883	151785552	2670	167	2643.06	321.46
chr1	151872740	151874400	1661	86	1306.04	313.62
chr1	151897705	151898837	1133	81	1345.61	250.9
chr1	151908655	151910271	1617	108	1751.49	235.21
chr1	151910400	151911179	780	16	199.11	70.56
chr1	151917548	151918402	855	8	81.43	31.36
chr1	151966790	151968385	1596	89	1379.2	290.1
chr1	152014132	152015381	1250	30	373.03	78.4
chr1	152022132	152023172	1041	23	283.39	101.93
chr1	152160548	152162142	1595	101	1616.67	321.46
chr1	152162274	152163419	1146	72	1159.05	282.26
chr1	152183862	152186126	2265	96	1371.13	180.33
chr1	152196391	152197832	1442	85	1339.1	250.9
chr1	152201516	152203493	1978	78	1095.25	188.17
chr1	152205322	152207890	2569	109	1553.23	274.42
chr1	152215405	152217602	2198	189	3100	266.58
chr1	152224192	152225809	1618	32	354.19	94.09
chr1	152229241	152232369	3129	141	2036.86	235.21
chr1	152421084	152422795	1712	120	1947.2	211.69
chr1	152457621	152462081	4461	253	3100	329.3
chr1	152510916	152512590	1675	78	1151.47	227.37
chr1	152563906	152565887	1982	46	551.69	94.09
chr1	152567227	152567783	557	5	56.86	31.36
chr1	152591687	152592424	738	11	127.97	62.72
chr1	152796184	152797731	1548	60	844.69	172.49
chr1	152797879	152798763	885	17	205.1	62.72
chr1	152846219	152848214	1996	86	1237.54	211.69
chr1	152865734	152867375	1642	99	1564.2	227.37
chr1	153175056	153176088	1033	37	518.86	125.45
chr1	153176357	153176874	518	7	85.81	31.36
chr1	153194583	153195669	1087	36	493.2	172.49
chr1	153199688	153201824	2137	113	1716.67	227.37
chr1	153212581	153215715	3135	154	2279.09	266.58
chr1	153221818	153223394	1577	104	1661.9	274.42
chr1	153239409	153239890	482	6	74.05	39.2
chr1	153240530	153243757	3228	144	2073.27	282.26
chr1	153289436	153291729	2294	71	925.18	133.29
chr1	153302626	153303182	557	18	257.72	109.77
chr1	153323735	153324628	894	52	828.08	211.69
chr1	153366219	153367408	1190	23	269.85	109.77
chr1	153374216	153376292	2077	69	921.01	180.33
chr1	153378632	153379937	1306	133	2393.02	407.7
chr1	153411251	153412719	1469	98	1591.79	290.1
chr1	153428914	153431700	2787	46	484.29	62.72
chr1	153431731	153432138	408	7	93.84	47.04
chr1	153444721	153446476	1756	130	2159.72	337.14
chr1	153462782	153464029	1248	50	715.87	148.97
chr1	153464153	153464653	501	9	116.41	39.2
chr1	153477429	153477862	434	8	106.89	54.88
chr1	153479648	153481579	1932	41	478.63	133.29
chr1	153486898	153487272	375	11	159.02	86.25
chr1	153491002	153492533	1532	33	392.26	109.77
chr1	153497545	153499128	1584	102	1639.79	313.62
chr1	153508764	153510356	1593	66	945.38	148.97
chr1	153513691	153514441	751	22	299.66	78.4
chr1	153536404	153538235	1832	102	1575.4	258.74
chr1	153544728	153547034	2307	186	3144.37	454.75
chr1	153547067	153547665	599	5	55.07	31.36
chr1	153559400	153559828	429	5	63.36	23.52
chr1	153559835	153561953	2119	72	966.84	188.17
chr1	153798422	153801270	2849	194	3136.31	274.42
chr1	153845949	153846763	815	21	275.19	125.45
chr1	153846867	153847259	393	6	79.52	47.04
chr1	153873669	153874088	420	6	78.09	39.2
chr1	153923515	153926143	2629	163	2574.36	297.94
chr1	153926376	153926814	439	6	76.79	31.36
chr1	153981399	153982117	719	24	338.48	125.45
chr1	154092530	154094035	1506	81	1245.28	250.9
chr1	154095457	154095778	322	6	94.5	47.04
chr1	154096533	154097084	552	7	83.69	31.36
chr1	154146469	154147881	1413	34	419.78	133.29
chr1	154169651	154171491	1841	118	1869.54	297.94
chr1	154211245	154216937	5693	218	2979.53	211.69
chr1	154256366	154257444	1079	52	785.29	188.17
chr1	154289145	154292303	3159	186	2891.46	297.94
chr1	154317835	154319454	1620	29	324.33	94.09
chr1	154350343	154353533	3191	282	3100	431.23
chr1	154354409	154354821	413	6	78.58	31.36
chr1	154358752	154359514	763	10	112.36	39.2
chr1	154362562	154363144	583	7	81.86	39.2
chr1	154429678	154431502	1825	80	1159.25	258.74
chr1	154448981	154450452	1472	73	1099.54	266.58
chr1	154452792	154453367	576	16	220.96	101.93
chr1	154517555	154517827	273	5	94.5	39.2
chr1	154517970	154520200	2231	122	1849.26	266.58
chr1	154527327	154528191	865	13	147.81	78.4
chr1	154531410	154532281	872	24	317.94	117.61
chr1	154573266	154575516	2251	174	2911.95	344.98
chr1	154692824	154693779	956	14	155.88	54.88
chr1	154735577	154738235	2659	91	1217.23	180.33
chr1	154808101	154809262	1162	61	938.85	196.01
chr1	154827616	154829137	1522	60	849.11	172.49
chr1	154837045	154838318	1274	111	1927.48	274.42
chr1	154896781	154898120	1340	32	395.52	109.77
chr1	154961569	154962825	1257	19	206.38	62.72
chr1	154963860	154966137	2278	176	2944.66	423.39
chr1	154976561	154977625	1065	74	1222.87	243.05
chr1	154983181	154989442	6262	436	3100	337.14
chr1	155002719	155005843	3125	181	2801.76	329.3
chr1	155049862	155050663	802	8	83.8	31.36
chr1	155129931	155130630	700	6	63.23	31.36
chr1	155130859	155131396	538	8	98.75	39.2
chr1	155281419	155283065	1647	34	397.11	78.4
chr1	155373365	155375683	2319	140	2199.56	235.21
chr1	156385743	156386587	845	14	163.63	39.2
chr1	156416946	156418155	1210	14	141.19	47.04
chr1	156918157	156919974	1818	27	281.72	54.88
chr1	156920013	156923161	3149	324	3100	344.98
chr1	157408198	157408845	648	8	91.75	31.36
chr1	157436667	157437328	662	10	118.89	47.04
chr1	157441343	157441859	517	5	58.71	23.52
chr1	158016795	158018088	1294	33	416.55	94.09
chr1	158090468	158091618	1151	15	144.29	39.2
chr1	158158809	158162686	3878	193	2859.04	321.46
chr1	158181824	158182482	659	6	64.97	31.36
chr1	158194295	158194835	541	15	208.56	86.25
chr1	158195261	158195677	417	5	64.08	31.36
chr1	158197104	158198797	1694	45	566.57	148.97
chr1	158198916	158199470	555	7	83.51	31.36
chr1	158199501	158200054	554	7	69.99	31.36
chr1	158266786	158269295	2510	174	2829.89	352.82
chr1	158306676	158307354	679	7	76.8	39.2
chr1	158320312	158320885	574	7	82.38	47.04
chr1	158334378	158335133	756	11	126.76	31.36
chr1	158335328	158335911	584	6	68.46	23.52
chr1	158441787	158442657	871	42	639.97	219.53
chr1	158497225	158499551	2327	160	2599.21	344.98
chr1	158520522	158521896	1375	73	1121.18	243.05
chr1	158578324	158580925	2602	222	3100	337.14
chr1	158814862	158816109	1248	19	206.98	54.88
chr1	159249748	159250525	778	8	72.32	31.36
chr1	159256222	159258188	1967	102	1543.97	211.69
chr1	159274753	159275695	943	30	393.02	109.77
chr1	159280801	159283061	2261	151	2435.83	266.58
chr1	159305791	159306363	573	9	110.76	54.88
chr1	159334542	159335425	884	10	105.63	39.2
chr1	159353392	159355518	2127	175	2975.81	462.59
chr1	159368098	159370306	2209	115	1738.74	274.42
chr1	159389695	159391703	2009	85	1216.8	188.17
chr1	159395363	159396790	1428	68	1014.28	235.21
chr1	159401640	159404048	2409	136	2098.17	211.69
chr1	159413021	159414305	1285	67	1026.25	196.01
chr1	159438232	159439822	1591	92	1439.13	368.5
chr1	159462389	159463439	1051	44	641.82	172.49
chr1	159463847	159464464	618	12	136.91	78.4
chr1	159494872	159495548	677	10	117.85	54.88
chr1	159541718	159543080	1363	36	457.59	141.13
chr1	159550114	159551969	1856	96	1453.91	203.85
chr1	159625780	159626471	692	26	378.14	180.33
chr1	159626633	159627151	519	25	392.29	133.29
chr1	159635159	159637038	1880	89	1315.96	219.53
chr1	159642496	159642702	207	5	125.93	39.2
chr1	159664270	159664939	670	7	77.24	39.2
chr1	159676256	159677300	1045	30	396.59	148.97
chr1	159760271	159761026	756	15	185.87	62.72
chr1	159766737	159767504	768	15	184.81	94.09
chr1	159776189	159777002	814	8	83.25	39.2
chr1	159962182	159964487	2306	98	1400.21	219.53
chr1	159985844	159987214	1371	95	1559.72	305.78
chr1	160001592	160004153	2562	126	1871.06	305.78
chr1	160259778	160261096	1319	59	867.87	196.01
chr1	160305666	160306994	1329	33	412.7	78.4
chr1	160733768	160735967	2200	135	2131.69	337.14
chr1	160797157	160799260	2104	95	1383.16	219.53
chr1	161026934	161027781	848	8	81.73	31.36
chr1	161557065	161559794	2730	152	2332.13	305.78
chr1	162794411	162797131	2721	44	460.44	70.56
chr1	163833656	163834539	884	32	453.91	188.17
chr1	163866076	163868744	2669	126	1848.78	250.9
chr1	163933595	163934865	1271	63	952.88	211.69
chr1	164003849	164005791	1943	200	3100	360.66
chr1	164063321	164065802	2482	158	2514.43	227.37
chr1	164402964	164403441	478	5	60.66	23.52
chr1	164725660	164726186	527	16	227.39	101.93
chr1	165074821	165076296	1476	22	234.09	54.88
chr1	165110825	165113003	2179	94	1350.37	203.85
chr1	165211313	165212236	924	13	143.95	62.72
chr1	165279547	165280198	652	15	195.88	94.09
chr1	165357123	165357786	664	11	133.28	70.56
chr1	165455237	165456621	1385	61	892.19	148.97
chr1	165456753	165459108	2356	73	950.8	133.29
chr1	165675008	165675524	517	6	72.01	23.52
chr1	165690313	165691849	1537	44	568.86	164.65
chr1	165786739	165787457	719	7	74.91	39.2
chr1	165787887	165790402	2516	85	1134.14	180.33
chr1	165865816	165867079	1264	27	324.43	109.77
chr1	165949144	165952486	3343	120	1620.46	180.33
chr1	165957219	165959275	2057	93	1355.21	180.33
chr1	166055897	166056168	272	5	94.5	39.2
chr1	166102894	166105175	2282	52	616.15	86.25
chr1	166169319	166175056	5738	414	3100	344.98
chr1	166371448	166373050	1603	35	416.58	78.4
chr1	166414176	166416564	2389	133	2044.55	313.62
chr1	166461553	166463027	1475	74	1117.91	266.58
chr1	167341318	167343531	2214	78	1057.22	164.65
chr1	167602973	167605550	2578	176	2850.38	337.14
chr1	167662882	167663727	846	17	208.52	70.56
chr1	167695741	167696638	898	15	174.28	78.4
chr1	167719811	167722674	2864	122	1718.66	219.53
chr1	168029805	168031797	1993	151	2518.38	321.46
chr1	168128454	168130017	1564	114	1890.26	305.78
chr1	168130059	168130607	549	5	57.22	23.52
chr1	168309270	168311229	1960	66	886.06	258.74
chr1	168767158	168769094	1937	80	1138.61	188.17
chr1	169487016	169487887	872	11	119.61	39.2
chr1	169549789	169550264	476	5	60.77	31.36
chr1	169720427	169723336	2910	189	3017.69	321.46
chr1	169976291	169978734	2444	131	1992.8	211.69
chr1	170017230	170019547	2318	118	1771.84	297.94
chr1	170019981	170021578	1598	20	199.58	47.04
chr1	170076733	170078441	1709	56	749.43	172.49
chr1	170678731	170680186	1456	90	1434.61	368.5
chr1	170689632	170692380	2749	81	1034.37	125.45
chr1	170767181	170772050	4870	347	3100	352.82
chr1	171642262	171643041	780	12	139.37	54.88
chr1	171711901	171715319	3419	207	3100	329.3
chr1	171950334	171952726	2393	177	2927.78	360.66
chr1	172058828	172061676	2849	210	3100	344.98
chr1	172099555	172105134	5580	414	3100	431.23
chr1	172105487	172106056	570	5	56.29	23.52
chr1	172256458	172258705	2248	146	2338.61	329.3
chr1	172394423	172397065	2643	163	2570.61	297.94
chr1	173035290	173036391	1102	17	188.53	78.4
chr1	173200581	173201028	448	5	62.28	23.52
chr1	173226141	173226920	780	15	183.76	86.25
chr1	173234411	173237513	3103	165	2496.05	235.21
chr1	173258144	173259817	1674	97	1516.52	290.1
chr1	173427406	173429207	1802	28	296.78	70.56
chr1	174440766	174444419	3654	219	3100	290.1
chr1	176273314	176274031	718	25	356.17	141.13
chr1	176328672	176331056	2385	91	1259.93	133.29
chr1	176777401	176779221	1821	59	768.07	188.17
chr1	176960485	176962847	2363	87	1192.43	164.65
chr1	177252682	177255257	2576	150	2330.93	258.74
chr1	177255289	177256498	1210	28	345.35	78.4
chr1	177261017	177263332	2316	79	1059.39	219.53
chr1	177316658	177319364	2707	128	1878.53	235.21
chr1	177464354	177466178	1825	47	584.26	164.65
chr1	177528868	177530518	1651	62	863.38	227.37
chr1	177601236	177602494	1259	65	993.72	274.42
chr1	178050414	178051243	830	9	95.31	39.2
chr1	178111843	178114015	2173	80	1081.14	117.61
chr1	178116919	178119736	2818	242	3100	337.14
chr1	178189523	178192820	3298	179	2720.93	290.1
chr1	178389667	178391893	2227	84	1161.1	243.05
chr1	178465286	178465972	687	12	146.3	54.88
chr1	178467040	178467633	594	5	55.27	23.52
chr1	178736616	178739525	2910	174	2718.61	313.62
chr1	178867560	178869219	1660	97	1520.05	250.9
chr1	179257035	179259380	2346	124	1880.5	258.74
chr1	179269087	179269684	598	7	67.78	31.36
chr1	179269705	179270607	903	42	633.32	180.33
chr1	179323909	179327415	3507	225	3100	282.26
chr1	179340296	179341684	1389	29	343.76	70.56
chr1	180264912	180266481	1570	39	483.15	133.29
chr1	180624502	180628490	3989	245	3100	250.9
chr1	180824239	180825253	1015	73	1217.76	329.3
chr1	180838450	180839206	757	9	99.13	39.2
chr1	180839215	180840171	957	33	460.19	117.61
chr1	181024619	181026378	1760	60	793.91	141.13
chr1	181026873	181027417	545	5	57.4	23.52
chr1	181027701	181028294	594	6	67.97	23.52
chr1	181074656	181076946	2291	132	2049.03	227.37
chr1	181077141	181078156	1016	17	194.65	54.88
chr1	181188034	181188896	863	13	147.94	47.04
chr1	181258254	181258817	564	6	69.47	31.36
chr1	181258999	181260095	1097	24	293.62	86.25
chr1	181706005	181709437	3433	154	2218.78	227.37
chr1	181869639	181872549	2911	112	1547.88	235.21
chr1	182271957	182272716	760	10	112.54	39.2
chr1	182272798	182273538	741	13	156.9	54.88
chr1	182286972	182288583	1612	110	1793.57	290.1
chr1	182621891	182624244	2354	61	752	109.77
chr1	182988938	182991786	2849	227	3100	337.14
chr1	183208878	183210600	1723	90	1368.8	180.33
chr1	183281053	183282883	1831	113	1792.34	203.85
chr1	183390928	183394202	3275	208	3100	266.58
chr1	183519081	183519543	463	5	61.46	23.52
chr1	183549208	183554080	4873	273	3100	243.05
chr1	183929673	183930366	694	8	76.08	47.04
chr1	183969591	183970435	845	13	149.18	78.4
chr1	184609299	184612928	3630	295	3100	376.34
chr1	184854206	184854640	435	7	91.68	47.04
chr1	184915454	184917699	2246	100	1448.3	196.01
chr1	185064472	185065277	806	42	654.28	164.65
chr1	185308249	185308927	679	9	103.65	39.2
chr1	191044160	191045705	1546	53	721.16	235.21
chr1	191293078	191297020	3943	342	3100	423.39
chr1	191297214	191297443	230	5	109.99	39.2
chr1	191339777	191341709	1933	114	1785.48	235.21
chr1	191356964	191359122	2159	137	2182.68	266.58
chr1	191359404	191359775	372	6	79.52	47.04
chr1	191654051	191654798	748	11	127.29	70.56
chr1	194102210	194102699	490	5	60.04	31.36
chr1	194844146	194844770	625	6	54.02	31.36
chr1	195380407	195383085	2679	215	3100	407.7
chr1	195436053	195438103	2051	100	1487.61	274.42
chr1	195911250	195911735	486	6	73.81	39.2
chr1	196009441	196011681	2241	82	1123.39	125.45
chr1	196137972	196139364	1393	43	570.64	148.97
chr1	196391871	196395509	3639	209	3222.65	219.53
chr1	196470050	196470565	516	5	58.76	23.52
chr1	196832875	196833936	1062	14	149.31	39.2
chr1	196833988	196834595	608	10	122.81	39.2
chr1	196874778	196877560	2783	99	1338.19	148.97
chr1	196917730	196918236	507	5	59.2	31.36
chr1	197165606	197173624	8019	363	3100	274.42
chr1	198167768	198168265	498	8	87.13	39.2
chr1	198264509	198265627	1119	19	216.12	86.25
chr1	198274851	198275578	728	11	128.65	39.2
chr1	198537430	198538637	1208	45	632.8	180.33
chr1	198644524	198646587	2064	77	1063.1	196.01
chr1	198855450	198857386	1937	117	1843.75	290.1
chr1	198904892	198906323	1432	53	738.82	211.69
chr1	198974638	198975221	584	5	55.69	23.52
chr1	199126610	199127173	564	6	69.47	31.36
chr1	199350076	199350732	657	16	211.46	86.25
chr1	199389172	199390546	1375	35	439.95	109.77
chr1	199406618	199407483	866	15	162.09	54.88
chr1	199703286	199705775	2490	95	1313.99	133.29
chr1	199741938	199743393	1456	55	770.52	188.17
chr1	199774373	199775874	1502	16	152.61	31.36
chr1	200064840	200066248	1409	88	1407.39	297.94
chr1	200124117	200124791	675	8	90.22	39.2
chr1	200182361	200182899	539	5	57.68	23.52
chr1	200190391	200192468	2078	165	2782.29	431.23
chr1	200218129	200219465	1337	71	1091.38	164.65
chr1	200379010	200381061	2052	52	639.98	78.4
chr1	200394430	200397298	2869	146	2184.6	180.33
chr1	200576312	200578367	2056	79	1100.05	313.62
chr1	200584133	200585537	1405	119	2049.35	352.82
chr1	201041860	201044570	2711	112	1564.11	250.9
chr1	201046086	201047475	1390	50	692.38	148.97
chr1	201096459	201097997	1539	41	519.06	101.93
chr1	201123727	201125280	1554	102	1628.09	313.62
chr1	201162021	201163416	1396	81	1271.99	290.1
chr1	201192546	201194617	2072	125	1966.96	321.46
chr1	201201986	201203879	1894	76	1073.65	266.58
chr1	201235134	201235496	363	5	65.12	39.2
chr1	201242240	201244280	2041	121	1895.9	266.58
chr1	201262053	201262980	928	19	231.87	86.25
chr1	201503191	201503465	275	5	94.5	39.2
chr1	201541156	201543450	2295	117	1757.82	203.85
chr1	201917711	201920115	2405	35	355.32	54.88
chr1	201920219	201920969	751	9	99.46	47.04
chr1	201920985	201922133	1149	31	400.5	78.4
chr1	202031081	202033077	1997	93	1367.13	219.53
chr1	202097241	202098920	1680	138	2352.84	313.62
chr1	202308856	202309346	491	6	73.51	31.36
chr1	202309549	202310057	509	6	72.46	31.36
chr1	202613361	202614134	774	11	125.58	47.04
chr1	202642543	202648297	5755	503	3100	352.82
chr1	202729615	202730709	1095	21	247.72	70.56
chr1	202741741	202742215	475	5	60.82	31.36
chr1	202742390	202742832	443	5	62.56	31.36
chr1	202742882	202744000	1119	27	338.86	86.25
chr1	202751664	202753291	1628	69	993.83	219.53
chr1	202919800	202920652	853	9	94.18	31.36
chr1	202920677	202921863	1187	16	169.17	47.04
chr1	203356462	203358945	2484	132	2002.85	344.98
chr1	203445682	203448022	2341	126	1920.21	219.53
chr1	203463242	203465002	1761	49	624.42	117.61
chr1	203556974	203557863	890	12	132.21	70.56
chr1	203578345	203579807	1463	30	352.41	109.77
chr1	203579857	203580329	473	26	422.17	180.33
chr1	203666388	203667000	613	7	80.19	39.2
chr1	203739936	203740338	403	5	64.93	31.36
chr1	203865815	203868535	2721	164	2569.9	321.46
chr1	203914948	203916261	1314	22	245.27	54.88
chr1	203983631	203986657	3027	135	1945.48	188.17
chr1	204010215	204011541	1327	52	738.34	219.53
chr1	204047344	204049772	2429	107	1542.63	180.33
chr1	204085419	204086246	828	11	122.2	62.72
chr1	204422572	204423107	536	6	70.95	39.2
chr1	204710096	204711463	1368	38	489.91	172.49
chr1	204746592	204748135	1544	26	286.31	54.88
chr1	204796788	204798385	1598	47	611.34	94.09
chr1	204851345	204852499	1155	79	1297.94	258.74
chr1	204875146	204877746	2601	140	2130.06	258.74
chr1	204925106	204927010	1905	51	640.29	125.45
chr1	205149148	205149915	768	9	98.53	31.36
chr1	205264244	205265518	1275	23	262.88	94.09
chr1	205286308	205287931	1624	38	461.55	86.25
chr1	205288925	205291677	2753	174	2760.33	337.14
chr1	205292382	205293688	1307	70	1079.02	211.69
chr1	205560799	205563498	2700	152	2339.39	321.46
chr1	205694501	205695041	541	10	128.22	62.72
chr1	205736151	205736842	692	12	131.2	62.72
chr1	205864644	205865150	507	6	72.58	31.36
chr1	205884562	205886544	1983	79	1112.41	203.85
chr1	205909219	205909878	660	9	104.84	39.2
chr1	205991514	205991991	478	5	60.66	23.52
chr1	205992001	205993427	1427	186	3100	376.34
chr1	205993552	205994302	751	14	171.07	62.72
chr1	206107118	206109260	2143	114	1734.55	188.17
chr1	206198937	206199771	835	13	149.88	62.72
chr1	206202952	206203653	702	20	272.24	101.93
chr1	206483108	206484400	1293	22	246.82	54.88
chr1	207915038	207916165	1128	38	521.94	101.93
chr1	208023698	208024912	1215	48	685.43	219.53
chr1	208045721	208046205	485	8	102.67	54.88
chr1	208067444	208068585	1142	49	698.42	203.85
chr1	208550915	208551442	528	5	58.19	31.36
chr1	208568528	208569692	1165	26	318.32	109.77
chr1	209102029	209102409	381	5	65.12	39.2
chr1	209497732	209499249	1518	55	760.54	148.97
chr1	209499279	209501619	2341	105	1522.54	258.74
chr1	209566738	209567272	535	7	84.73	39.2
chr1	209622451	209623696	1246	66	1015.92	203.85
chr1	209816527	209820212	3686	168	2429.15	164.65
chr1	209914317	209916153	1837	143	2403.51	337.14
chr1	209916324	209916780	457	5	61.78	23.52
chr1	210069494	210071147	1654	47	604.31	101.93
chr1	210274068	210277803	3736	308	3100	313.62
chr1	210524391	210527548	3158	209	3100	305.78
chr1	210654064	210655121	1058	60	944.18	235.21
chr1	210672341	210673916	1576	55	751.58	133.29
chr1	210797893	210798445	553	6	70.05	23.52
chr1	210798450	210799307	858	17	207.45	70.56
chr1	210806619	210807204	586	17	236.55	109.77
chr1	210846732	210850103	3372	72	822.98	125.45
chr1	210905328	210905898	571	13	172.3	78.4
chr1	211030885	211032806	1922	147	2458.56	297.94
chr1	211097553	211099368	1816	90	1348.28	164.65
chr1	211099717	211100143	427	5	63.48	31.36
chr1	211100188	211101117	930	10	103.33	39.2
chr1	211190534	211190934	401	5	65.06	31.36
chr1	211254481	211255960	1480	88	1388.58	297.94
chr1	211290501	211292447	1947	88	1283.85	250.9
chr1	211292900	211293381	482	5	60.45	23.52
chr1	212520429	212522417	1989	66	881.86	109.77
chr1	212843103	212845318	2216	115	1737.16	227.37
chr1	213806709	213808805	2097	113	1725.91	227.37
chr1	214461013	214461635	623	6	66.59	39.2
chr1	214771515	214771834	320	5	79.52	39.2
chr1	214840690	214841619	930	22	278.78	78.4
chr1	215870025	215871890	1866	86	1262.63	235.21
chr1	216524560	216526769	2210	117	1776.93	219.53
chr1	216585404	216586167	764	10	112.3	31.36
chr1	217413299	217415406	2108	102	1513.39	266.58
chr1	218167705	218168857	1153	27	319.5	78.4
chr1	218285108	218286953	1846	132	2172.56	321.46
chr1	218329095	218330475	1381	56	801.29	125.45
chr1	218334026	218334995	970	72	1211.43	250.9
chr1	218511197	218512987	1791	140	2356.32	352.82
chr1	218930228	218930841	614	7	80.14	39.2
chr1	218988022	218988799	778	14	168.84	62.72
chr1	219026590	219027293	704	6	63.07	23.52
chr1	219118878	219119347	470	6	74.79	39.2
chr1	219119432	219119891	460	9	120.02	47.04
chr1	219980368	219983824	3457	165	2419.14	211.69
chr1	220828840	220830542	1703	103	1627.52	250.9
chr1	220857385	220857897	513	9	115.41	62.72
chr1	220858036	220859399	1364	76	1181.98	188.17
chr1	220883430	220885637	2208	158	2594.45	423.39
chr1	220895119	220895644	526	7	85.3	31.36
chr1	220950599	220952362	1764	97	1494.48	243.05
chr1	220952411	220954177	1767	118	1910.6	243.05
chr1	221054696	221055940	1245	53	771.13	188.17
chr1	221382651	221383363	713	18	237.76	70.56
chr1	221966354	221967630	1277	27	323.23	78.4
chr1	222003169	222003612	444	11	153.7	62.72
chr1	222042899	222043480	582	11	139.94	47.04
chr1	222098309	222101385	3077	170	2598.8	211.69
chr1	222246334	222246892	559	8	97.31	54.88
chr1	222247195	222247660	466	6	75.04	39.2
chr1	222367847	222370001	2155	140	2244.02	290.1
chr1	222370327	222370872	546	5	57.36	23.52
chr1	222436880	222438904	2025	118	1840.87	211.69
chr1	222583247	222585734	2488	182	3000.81	392.02
chr1	222595176	222595990	815	35	520.22	188.17
chr1	222610833	222612299	1467	77	1177.13	196.01
chr1	222686483	222688700	2218	83	1144.78	180.33
chr1	222688919	222690274	1356	64	953.88	188.17
chr1	223183623	223184923	1301	63	946.48	250.9
chr1	223679561	223683757	4197	242	3100	313.62
chr1	223721523	223722492	970	12	127.55	47.04
chr1	223906552	223907267	716	7	75.05	31.36
chr1	223907593	223908339	747	9	99.68	39.2
chr1	224031432	224031994	563	10	126.37	47.04
chr1	224032148	224033520	1373	134	2385.97	337.14
chr1	224033689	224034130	442	5	62.62	31.36
chr1	224064037	224065085	1049	24	298.35	94.09
chr1	224135510	224137860	2351	126	1917.88	266.58
chr1	224177609	224179246	1638	104	1664.94	282.26
chr1	224252355	224254056	1702	111	1787.77	258.74
chr1	224254074	224254518	445	8	105.94	54.88
chr1	224315616	224316777	1162	41	569.29	141.13
chr1	224317004	224319962	2959	198	3165.09	297.94
chr1	224337232	224338307	1076	25	311.45	62.72
chr1	224355014	224355581	568	5	56.38	23.52
chr1	224363894	224365940	2047	41	468.4	117.61
chr1	224375603	224377257	1655	31	351.15	86.25
chr1	224439981	224441762	1782	116	1845.78	235.21
chr1	224477440	224478835	1396	19	197.64	39.2
chr1	224562094	224564467	2374	129	1970.49	313.62
chr1	224660276	224662778	2503	128	1921.86	172.49
chr1	224934128	224934787	660	10	119.03	62.72
chr1	224957338	224958200	863	26	352.7	78.4
chr1	224991401	224993608	2208	96	1381.72	156.81
chr1	225124516	225125912	1397	27	312.62	86.25
chr1	225193426	225194472	1047	37	516.67	141.13
chr1	225194604	225195722	1119	54	814.68	219.53
chr1	225568279	225573494	5216	324	3100	250.9
chr1	225795982	225797067	1086	32	424.95	101.93
chr1	225817544	225818987	1444	68	1010.98	196.01
chr1	225908021	225908871	851	11	120.83	39.2
chr1	225909000	225909329	330	5	79.52	39.2
chr1	225909792	225910101	310	5	79.52	39.2
chr1	225910346	225910747	402	5	64.99	31.36
chr1	225910829	225911411	583	9	110.03	47.04
chr1	225988656	225990692	2037	122	1916.69	235.21
chr1	226335697	226338845	3149	226	3100	282.26
chr1	226356182	226357907	1726	75	1085.8	282.26
chr1	226358100	226358766	667	10	118.54	62.72
chr1	226362537	226364590	2054	100	1486.98	211.69
chr1	226393553	226394481	929	21	262.99	117.61
chr1	226394563	226395615	1053	89	1540.25	258.74
chr1	226419539	226420019	481	7	88.3	47.04
chr1	226420021	226421102	1082	34	459.46	117.61
chr1	226467449	226468040	592	5	55.36	31.36
chr1	226529976	226530691	716	10	115.28	54.88
chr1	226632861	226633636	776	12	139.65	54.88
chr1	226659101	226661211	2111	140	2256.53	297.94
chr1	226661373	226662342	970	31	406.42	156.81
chr1	226670195	226671053	859	15	177.26	78.4
chr1	226699977	226700559	583	7	81.86	31.36
chr1	226710157	226714030	3874	226	3100	376.34
chr1	226717836	226718978	1143	27	336.35	94.09
chr1	226740731	226742990	2260	129	1997.96	266.58
chr1	226848936	226849559	624	6	66.55	31.36
chr1	226937486	226938064	579	5	55.9	23.52
chr1	227473210	227474809	1600	67	962.36	196.01
chr1	227543491	227545801	2311	99	1417.61	196.01
chr1	227709308	227711304	1997	158	2663.23	344.98
chr1	227756710	227757678	969	17	198.23	70.56
chr1	227757995	227758477	483	7	88.16	39.2
chr1	227758674	227761918	3245	176	2675.34	219.53
chr1	227826982	227830085	3104	215	3100	297.94
chr1	228268332	228271891	3560	176	2604.99	250.9
chr1	228372001	228372505	505	5	59.29	31.36
chr1	228628371	228629049	679	6	64.11	23.52
chr1	228844332	228846270	1939	156	2641.27	392.02
chr1	229069502	229071033	1532	72	1068.07	148.97
chr1	229071147	229071662	516	11	146.05	70.56
chr1	229074243	229074625	383	5	65.12	39.2
chr1	229179268	229183041	3774	258	3100	352.82
chr1	229239231	229239750	520	5	58.57	31.36
chr1	229240401	229243900	3500	174	2579.93	282.26
chr1	229363371	229364297	927	14	157.81	47.04
chr1	229364380	229365354	975	12	127.27	47.04
chr1	229413689	229414179	491	9	117.26	62.72
chr1	229442182	229442648	467	5	61.24	23.52
chr1	229442671	229444800	2130	198	3100	329.3
chr1	229537605	229538934	1330	29	349.26	70.56
chr1	229538988	229542221	3234	289	3100	384.18
chr1	229622158	229625324	3167	187	2909.11	282.26
chr1	229730050	229732448	2399	100	1419.82	211.69
chr1	229806155	229806779	625	9	107.12	54.88
chr1	229828766	229829906	1141	23	274.1	62.72
chr1	230832299	230832880	582	5	55.78	23.52
chr1	231007422	231008807	1386	52	728.49	141.13
chr1	231152226	231153745	1520	74	1108.25	211.69
chr1	231497525	231498219	695	6	63.44	31.36
chr1	231529939	231531847	1909	51	639.83	94.09
chr1	231815862	231816460	599	5	55.07	23.52
chr1	231816538	231816948	411	5	64.44	31.36
chr1	231816975	231818621	1647	27	293.27	54.88
chr1	232574749	232577169	2421	192	3230.05	344.98
chr1	232677816	232678375	560	5	56.73	31.36
chr1	232679792	232681839	2048	121	1894.1	188.17
chr1	232801921	232802831	911	13	144.78	62.72
chr1	232805470	232806207	738	7	74.05	31.36
chr1	232806499	232812175	5677	315	3100	235.21
chr1	232812288	232813495	1208	27	329.8	86.25
chr1	232878484	232879128	645	9	105.8	54.88
chr1	232926640	232927214	575	5	56.08	23.52
chr1	233356504	233358840	2337	165	2698.32	274.42
chr1	233390130	233391908	1779	119	1927.38	352.82
chr1	233555475	233560049	4575	275	3100	282.26
chr1	233597043	233598168	1126	53	794.36	203.85
chr1	233732337	233735619	3283	179	2724.45	250.9
chr1	234095618	234097959	2342	128	1958.67	243.05
chr1	234294181	234295543	1363	19	199.63	54.88
chr1	234372414	234373493	1080	30	392.25	133.29
chr1	234510752	234512751	2000	62	811.86	156.81
chr1	234624903	234626340	1438	33	401.36	94.09
chr1	234752888	234755305	2418	183	3044.07	305.78
chr1	234833100	234835065	1966	151	2527.31	290.1
chr1	235024623	235026957	2335	142	2235.01	321.46
chr1	237616217	237617379	1163	12	117.8	31.36
chr1	237949851	237950603	753	8	73.39	47.04
chr1	239748054	239750441	2388	135	2083.78	227.37
chr1	239761136	239762243	1108	51	760.51	227.37
chr1	239868424	239870686	2263	102	1482.07	290.1
chr1	240077369	240079780	2412	147	2313.94	313.62
chr1	241331191	241331946	756	10	112.78	62.72
chr1	241482526	241486816	4291	230	3100	321.46
chr1	241584302	241584902	601	7	80.85	39.2
chr1	241703406	241704077	672	8	90.39	23.52
chr1	241712720	241713264	545	6	70.47	31.36
chr1	242080133	242080808	676	10	117.92	39.2
chr1	242276983	242278166	1184	73	1168.73	297.94
chr1	242278375	242279201	827	13	150.44	47.04
chr1	242279206	242280397	1192	21	239.86	62.72
chr1	242680166	242682052	1887	99	1504.47	196.01
chr1	242682255	242682812	558	11	142.08	62.72
chr1	242690794	242691713	920	17	202.16	70.56
chr1	242882044	242882915	872	18	221.57	70.56
chr1	242882928	242885321	2394	119	1774.33	196.01
chr1	242959845	242960780	936	17	200.85	54.88
chr1	243064495	243067184	2690	133	1976.32	297.94
chr1	243090390	243095239	4850	266	3100	352.82
chr1	243148644	243149271	628	13	166.66	78.4
chr1	243199338	243202107	2770	122	1754.51	156.81
chr1	243385959	243386513	555	6	69.94	31.36
chr1	243386599	243387186	588	5	55.52	31.36
chr1	244655295	244657358	2064	44	512.67	70.56
chr1	244736140	244737648	1509	65	942.49	196.01
chr1	244794661	244797763	3103	228	3100	305.78
chr1	244953670	244955607	1938	95	1416.97	203.85
chr1	245159974	245162688	2715	129	1895.65	250.9
chr1	245237200	245238056	857	23	303.18	117.61
chr1	245307317	245309090	1774	102	1589.63	274.42
chr1	245333118	245334666	1549	72	1064.62	274.42
chr1	245341053	245341852	800	9	96.84	31.36
chr1	245341895	245342352	458	6	75.55	39.2
chr1	245382202	245382895	694	6	63.48	23.52
chr1	245385884	245386879	996	15	167.34	54.88
chr1	245388948	245389604	657	7	77.89	31.36
chr1	245439523	245440940	1418	49	670.53	141.13
chr1	245560766	245563267	2502	110	1584.09	196.01
chr1	245577503	245578113	611	6	67.15	23.52
chr1	245603668	245603954	287	6	109.99	47.04
chr1	245778305	245780185	1881	56	726.16	109.77
chr1	245780627	245781653	1027	18	208.47	54.88
chr1	245781734	245782374	641	7	78.71	31.36
chr1	245782949	245783416	468	5	61.19	31.36
chr1	245869473	245870064	592	5	55.36	31.36
chr1	246086858	246090110	3253	157	2310.91	219.53
chr1	246136225	246137035	811	16	196.31	78.4
chr1	246167027	246167650	624	23	335.63	141.13
chr1	247085931	247087920	1990	101	1519.74	203.85
chr1	247097985	247100359	2375	145	2284.01	235.21
chr1	247117733	247119896	2164	75	1012.36	148.97
chr1	247119961	247120534	574	24	362.55	141.13
chr1	247123447	247124544	1098	43	615.32	235.21
chr1	247133629	247135030	1402	70	1057.65	290.1
chr1	247166614	247167430	817	22	291.42	125.45
chr1	247167558	247168084	527	12	160.86	78.4
chr10	170185	172893	2709	113	1600.81	219.53
chr10	965249	965963	715	6	62.63	31.36
chr10	966112	967669	1558	90	1408.13	211.69
chr10	1023429	1025727	2299	144	2284.44	258.74
chr10	1079235	1080144	910	10	104.31	47.04
chr10	1081827	1082594	768	7	72.74	39.2
chr10	1083373	1086305	2933	190	3031.34	376.34
chr10	1090979	1091405	427	5	63.48	31.36
chr10	1091446	1094200	2755	174	2759.78	313.62
chr10	3099309	3101809	2501	66	816.61	156.81
chr10	3203957	3205214	1258	76	1208.74	164.65
chr10	3814682	3818466	3785	211	3226.07	266.58
chr10	3860568	3861543	976	12	127.22	47.04
chr10	4858273	4859315	1043	14	150.43	54.88
chr10	5126567	5127954	1388	34	422.42	86.25
chr10	5128061	5128409	349	5	65.12	39.2
chr10	5444057	5445896	1840	72	1010.83	196.01
chr10	5478473	5481153	2681	149	2285.56	243.05
chr10	5481325	5481761	437	5	62.9	31.36
chr10	5747476	5749226	1751	99	1536.59	227.37
chr10	5766710	5768888	2179	167	2789.98	282.26
chr10	5774196	5775077	882	19	236.17	78.4
chr10	5893354	5896403	3050	148	2183.7	219.53
chr10	5970384	5973513	3130	142	2055.22	235.21
chr10	5976726	5977342	617	9	107.66	54.88
chr10	6057927	6060461	2535	140	2145.62	203.85
chr10	6170545	6172437	1893	119	1895.32	243.05
chr10	6226390	6227665	1276	38	501.45	117.61
chr10	6227771	6228237	467	5	61.24	31.36
chr10	6245458	6247165	1708	60	801.58	188.17
chr10	6285309	6285997	689	11	131.42	70.56
chr10	6660035	6664130	4096	166	2316.68	235.21
chr10	7489424	7490015	592	7	81.35	31.36
chr10	7492030	7493276	1247	15	152.37	54.88
chr10	7868702	7871809	3108	219	3100	321.46
chr10	7899771	7901838	2068	187	3100	384.18
chr10	7954100	7954702	603	8	94.45	47.04
chr10	9932985	9933562	578	5	55.95	23.52
chr10	11099309	11100287	979	12	127.05	47.04
chr10	11246799	11249528	2730	61	713.13	86.25
chr10	11686711	11687234	524	5	58.38	23.52
chr10	11689789	11690086	298	5	79.52	39.2
chr10	11690260	11690492	233	5	109.99	39.2
chr10	11691334	11694602	3269	159	2345.26	258.74
chr10	11824080	11824997	918	11	117.05	47.04
chr10	11905059	11906539	1481	79	1212.45	188.17
chr10	11980063	11980555	493	5	59.89	23.52
chr10	12122869	12125280	2412	149	2353.7	282.26
chr10	12150808	12151903	1096	44	633.75	219.53
chr10	12210823	12212589	1767	90	1358.95	188.17
chr10	12276515	12279571	3057	232	3100	329.3
chr10	12430812	12432883	2072	71	956.4	180.33
chr10	13181291	13183319	2029	68	910.65	148.97
chr10	13240074	13240574	501	6	72.92	39.2
chr10	13243062	13244574	1513	86	1340.89	243.05
chr10	13381055	13382252	1198	35	461.02	94.09
chr10	13383750	13384811	1062	22	265.87	94.09
chr10	13428353	13431626	3274	109	1439.32	148.97
chr10	13668824	13670328	1505	95	1521.21	258.74
chr10	13788475	13789705	1231	14	140.12	31.36
chr10	13800023	13800512	490	6	73.57	31.36
chr10	14685419	14685891	473	5	60.92	31.36
chr10	14686162	14686805	644	7	78.56	31.36
chr10	14918950	14922000	3051	186	2919.41	313.62
chr10	14959342	14962445	3104	187	2925.34	360.66
chr10	15035005	15036830	1826	153	2618.09	297.94
chr10	15041027	15042410	1384	104	1741.08	250.9
chr10	15170381	15170880	500	15	213.93	94.09
chr10	15178427	15180574	2148	167	2800.35	368.5
chr10	15249547	15250736	1190	53	781.57	180.33
chr10	15290887	15291426	540	5	57.63	23.52
chr10	15451753	15453641	1889	33	362.29	78.4
chr10	15800716	15801739	1024	10	98.96	23.52
chr10	15801993	15802216	224	5	109.99	39.2
chr10	15882384	15882898	515	5	58.81	31.36
chr10	15883626	15884053	428	5	63.42	31.36
chr10	15925355	15926010	656	7	77.94	39.2
chr10	15939941	15943168	3228	207	3100	337.14
chr10	16518512	16519767	1256	44	607.55	196.01
chr10	16602570	16603989	1420	15	143.8	31.36
chr10	16896539	16897183	645	7	78.5	31.36
chr10	16898374	16899520	1147	79	1300.33	250.9
chr10	16899656	16900347	692	32	488.48	164.65
chr10	17282578	17283813	1236	47	663.9	148.97
chr10	17311533	17312832	1300	25	290.69	78.4
chr10	17533628	17537727	4100	222	3100	266.58
chr10	17698336	17700010	1675	97	1516.27	211.69
chr10	17724745	17728727	3983	319	3100	399.86
chr10	17744991	17745570	580	5	55.86	23.52
chr10	18956320	18956996	677	9	103.78	47.04
chr10	18977922	18978831	910	10	104.31	31.36
chr10	18978866	18981234	2369	130	1991.05	290.1
chr10	18987077	18989775	2699	175	2795.34	258.74
chr10	20055968	20056456	489	6	73.63	39.2
chr10	20056605	20057356	752	8	86.19	31.36
chr10	20144274	20145084	811	17	211.73	78.4
chr10	20145314	20146806	1493	49	642.34	109.77
chr10	20146839	20147339	501	5	59.49	23.52
chr10	21823008	21824354	1347	34	426.87	117.61
chr10	21824469	21826399	1931	27	274.69	54.88
chr10	21845520	21846869	1350	19	200.43	47.04
chr10	21853393	21855533	2141	47	551.83	94.09
chr10	21855644	21856945	1302	32	399.54	94.09
chr10	21861907	21864854	2948	87	1109.5	133.29
chr10	22331154	22333020	1867	101	1547.66	305.78
chr10	22557466	22560030	2565	88	1178.99	172.49
chr10	22580097	22582935	2839	106	1452.84	156.81
chr10	22644230	22646949	2720	179	2869.97	321.46
chr10	22648870	22649502	633	9	106.59	54.88
chr10	22649664	22652423	2760	79	999.67	164.65
chr10	22653797	22655350	1554	29	329.58	86.25
chr10	22664033	22664766	734	12	128.24	78.4
chr10	22664934	22665895	962	10	101.79	23.52
chr10	22668902	22670552	1651	65	917.1	172.49
chr10	22673985	22675126	1142	17	185.84	54.88
chr10	22765302	22767330	2029	86	1231.43	188.17
chr10	22804602	22805264	663	8	90.89	47.04
chr10	22805480	22805937	458	5	61.73	23.52
chr10	23040555	23043959	3405	220	3100	266.58
chr10	23256508	23257221	714	23	304.6	101.93
chr10	23424117	23425745	1629	61	849.16	196.01
chr10	23767515	23770228	2714	96	1296.18	125.45
chr10	24997615	24998108	494	6	73.33	31.36
chr10	25048022	25048571	550	5	57.18	23.52
chr10	25049990	25053634	3645	94	1142.12	117.61
chr10	25053745	25054312	568	9	111.13	54.88
chr10	25281446	25281992	547	6	70.36	23.52
chr10	25344646	25345427	782	12	139.23	47.04
chr10	25345548	25346591	1044	30	396.72	109.77
chr10	26766772	26769109	2338	47	534.01	78.4
chr10	26810990	26811343	354	5	65.12	39.2
chr10	27025666	27027790	2125	173	2934.27	243.05
chr10	27187780	27190126	2347	140	2192.29	321.46
chr10	27428459	27429854	1396	70	1058.95	211.69
chr10	27481469	27485625	4157	290	3100	337.14
chr10	27485688	27486315	628	8	92.93	31.36
chr10	27568886	27572621	3736	158	2235.49	243.05
chr10	27581223	27582006	784	18	230.11	109.77
chr10	27587548	27588150	603	10	123.2	47.04
chr10	27832741	27834613	1873	69	951.88	172.49
chr10	28071171	28071777	607	15	200.74	94.09
chr10	28072192	28072638	447	5	62.34	23.52
chr10	28327209	28328274	1066	11	109.64	31.36
chr10	28631355	28632825	1471	48	645.44	180.33
chr10	28860380	28864375	3996	186	2702.88	203.85
chr10	29006381	29007039	659	11	133.66	47.04
chr10	29737868	29739631	1764	51	657.27	164.65
chr10	30675766	30676279	514	5	58.85	31.36
chr10	30676520	30678601	2082	177	3034.55	329.3
chr10	30762159	30764466	2308	113	1679.03	164.65
chr10	30765392	30765952	561	5	56.69	23.52
chr10	30858328	30859003	676	15	193.44	94.09
chr10	31359851	31361864	2014	61	793.08	243.05
chr10	31647005	31650060	3056	136	1958.4	203.85
chr10	31931953	31932832	880	12	132.82	62.72
chr10	32088081	32088439	359	5	65.12	39.2
chr10	32088620	32089159	540	14	192.01	86.25
chr10	32256253	32258999	2747	123	1758.9	219.53
chr10	32259127	32259524	398	5	65.12	39.2
chr10	32383075	32385843	2769	180	2876.25	290.1
chr10	32673782	32677078	3297	153	2226.94	243.05
chr10	32705046	32708403	3358	178	2687.76	258.74
chr10	32774118	32776516	2399	131	2003.33	282.26
chr10	33250857	33251187	331	5	79.52	39.2
chr10	33284123	33285305	1183	19	211.46	54.88
chr10	33285458	33288760	3303	201	3150.61	290.1
chr10	33309064	33310075	1012	25	318.2	109.77
chr10	33334089	33335060	972	14	154.84	62.72
chr10	34490890	34491353	464	5	61.4	31.36
chr10	35143521	35144025	505	5	59.29	23.52
chr10	35350257	35350631	375	6	79.52	47.04
chr10	35418079	35419919	1841	73	1028.66	172.49
chr10	35455037	35457517	2481	100	1405.3	243.05
chr10	35664124	35667237	3114	126	1764.95	196.01
chr10	35969785	35970296	512	6	72.29	31.36
chr10	35970523	35971779	1257	13	126.09	31.36
chr10	35972049	35972865	817	7	58.82	31.36
chr10	38159985	38160551	567	6	69.32	23.52
chr10	38185474	38187319	1846	111	1748.66	219.53
chr10	38304660	38306254	1595	90	1398.96	274.42
chr10	38338672	38340467	1796	74	1054.65	196.01
chr10	38422703	38424329	1627	46	591.01	164.65
chr10	38446284	38446886	603	6	67.54	23.52
chr10	38684756	38685785	1030	20	238.14	94.09
chr10	38731182	38731884	703	35	543.03	133.29
chr10	38732041	38732672	632	17	230.76	117.61
chr10	38838386	38838849	464	10	135.36	70.56
chr10	38844131	38844511	381	8	109.99	62.72
chr10	38910808	38911285	478	5	60.66	31.36
chr10	38911977	38912610	634	11	135.62	62.72
chr10	38918064	38918588	525	5	58.33	23.52
chr10	38922272	38922475	204	5	125.93	39.2
chr10	39163302	39163791	490	7	87.67	47.04
chr10	41677684	41678324	641	6	65.77	23.52
chr10	41683004	41683583	580	5	55.86	31.36
chr10	41684576	41685368	793	14	167.64	54.88
chr10	41695782	41696366	585	5	55.65	23.52
chr10	41698767	41701863	3097	69	802.34	156.81
chr10	41701921	41703215	1295	16	163.02	47.04
chr10	41703598	41704118	521	6	71.78	39.2
chr10	41704274	41705853	1580	30	342.37	94.09
chr10	41707045	41708070	1026	18	208.55	94.09
chr10	41710765	41711325	561	5	56.69	23.52
chr10	41712416	41713404	989	15	167.81	62.72
chr10	41713674	41714280	607	6	54.74	23.52
chr10	41714304	41715810	1507	19	191.28	54.88
chr10	41715982	41717365	1384	34	422.85	125.45
chr10	41717885	41718476	592	7	81.35	31.36
chr10	41718566	41719027	462	6	75.29	31.36
chr10	41719175	41719820	646	13	164.99	78.4
chr10	41724419	41725179	761	7	73.04	31.36
chr10	41849117	41850986	1870	37	423.17	70.56
chr10	41851464	41852618	1155	16	171.1	47.04
chr10	41852675	41852951	277	6	109.99	47.04
chr10	41917678	41918199	522	6	71.73	23.52
chr10	41918212	41918973	762	7	73	31.36
chr10	41919239	41919747	509	6	72.46	39.2
chr10	41919868	41920661	794	10	110.53	39.2
chr10	42058806	42059152	347	7	109.99	54.88
chr10	42133388	42133939	552	6	70.1	39.2
chr10	42182845	42183521	677	22	292.55	86.25
chr10	42367107	42369044	1938	69	941.69	211.69
chr10	42453201	42455072	1872	119	1901.08	258.74
chr10	42569897	42570433	537	5	57.77	31.36
chr10	42597596	42599372	1777	73	1039.86	203.85
chr10	42652348	42652792	445	6	76.39	39.2
chr10	42952864	42955047	2184	128	1997.36	227.37
chr10	43017840	43018366	527	7	85.24	31.36
chr10	43176867	43178272	1406	61	888.19	188.17
chr10	43210821	43213572	2752	89	1169.41	148.97
chr10	43221191	43221837	647	12	149.59	54.88
chr10	43222028	43225330	3303	185	2836.17	235.21
chr10	43251611	43253342	1732	87	1309.43	227.37
chr10	43270212	43271617	1406	30	342.22	141.13
chr10	43389497	43390393	897	17	204.08	94.09
chr10	43410596	43410903	308	6	94.5	47.04
chr10	43421610	43422394	785	18	230.01	70.56
chr10	43463517	43464899	1383	28	328.99	78.4
chr10	43504964	43505660	697	16	207.2	62.72
chr10	43505809	43506157	349	5	65.12	39.2
chr10	44680083	44680480	398	8	109.99	62.72
chr10	44774473	44775092	620	9	107.45	54.88
chr10	44816282	44817193	912	13	144.71	54.88
chr10	44818063	44818702	640	7	78.76	31.36
chr10	45188488	45189536	1049	21	251.7	62.72
chr10	45189601	45190994	1394	52	727.19	180.33
chr10	45191047	45191630	584	5	55.69	23.52
chr10	45225601	45226079	479	5	60.61	23.52
chr10	45234289	45235752	1464	28	322.03	70.56
chr10	45395342	45396791	1450	48	648.44	125.45
chr10	45408049	45410491	2443	113	1651.25	250.9
chr10	45415986	45416595	610	8	94.02	47.04
chr10	45487006	45488785	1780	77	1112.47	211.69
chr10	45541979	45543588	1610	31	339.92	78.4
chr10	46371411	46371791	381	5	65.12	39.2
chr10	46562116	46562801	686	7	63.81	39.2
chr10	46563500	46564200	701	7	75.75	31.36
chr10	47125705	47126546	842	13	149.39	54.88
chr10	47974492	47975468	977	25	322.08	109.77
chr10	49184495	49185938	1444	61	881.11	148.97
chr10	49401187	49402687	1501	33	395.2	78.4
chr10	49534375	49534925	551	5	57.13	23.52
chr10	50416204	50417887	1684	65	911.51	235.21
chr10	51040785	51041179	395	6	79.52	47.04
chr10	51041672	51041888	217	6	159.02	47.04
chr10	51158489	51159793	1305	16	162.48	47.04
chr10	51234906	51236777	1872	115	1821.2	290.1
chr10	51241976	51243211	1236	45	628.3	250.9
chr10	51292471	51293085	615	13	167.9	70.56
chr10	51293588	51293983	396	9	125.93	70.56
chr10	51497142	51498596	1455	33	399.67	109.77
chr10	51755225	51756710	1486	21	219.58	54.88
chr10	51757016	51757492	477	11	150.04	78.4
chr10	51845936	51846199	264	5	94.5	39.2
chr10	51846527	51848613	2087	90	1294.05	148.97
chr10	52051345	52055775	4431	218	3214.43	203.85
chr10	52089726	52090104	379	5	65.12	39.2
chr10	52169081	52170432	1352	63	935.93	196.01
chr10	52420635	52421225	591	9	109.46	54.88
chr10	52421260	52421946	687	7	76.42	31.36
chr10	52503807	52505010	1204	27	330.19	78.4
chr10	53128387	53130337	1951	123	1959.48	368.5
chr10	53738191	53738877	687	7	76.42	31.36
chr10	53742851	53743397	547	5	57.31	31.36
chr10	53743541	53744617	1077	15	162.12	39.2
chr10	54238571	54239266	696	6	63.4	31.36
chr10	57789748	57791987	2240	138	2180.71	352.82
chr10	59695091	59698315	3225	122	1656.75	243.05
chr10	59698396	59700176	1781	95	1451.77	282.26
chr10	59764358	59766093	1736	82	1214.04	227.37
chr10	59814011	59816740	2730	166	2607.17	329.3
chr10	61138513	61138873	361	6	79.52	47.04
chr10	61139104	61140150	1047	16	178.07	62.72
chr10	61334447	61336924	2478	113	1625.72	180.33
chr10	61337820	61338760	941	14	156.87	70.56
chr10	62162130	62162889	760	8	85.8	39.2
chr10	62163039	62163402	364	6	79.52	47.04
chr10	62207674	62211766	4093	238	3100	290.1
[truncated: 15,198 more rows]

## Sheet: CD36_H3K27Me3_peaks
Chr	Start	End	Length	Tags	Pval(-10*LOG10)	Fold enrichment
chr1	559604	559987	384	11	66.66	13.15
chr1	815641	816199	559	11	51.85	7.17
chr1	822326	824000	1675	39	170.56	13.15
chr1	830700	832199	1500	49	263.74	20.32
chr1	843010	844202	1193	29	135.74	10.76
chr1	847131	849175	2045	69	384.91	16.74
chr1	849785	850380	596	15	71.77	13.15
chr1	850942	852446	1505	38	178.11	9.56
chr1	860271	860977	707	18	93.55	10.76
chr1	865553	866372	820	16	68.51	10.76
chr1	920774	921334	561	11	51.7	8.37
chr1	922175	923363	1189	29	136.1	9.56
chr1	923446	923986	541	16	94.48	13.15
chr1	924035	924613	579	11	50.35	9.56
chr1	924787	925383	597	13	63.83	9.56
chr1	925708	926653	946	24	119.05	15.54
chr1	964051	965088	1038	24	110.57	11.96
chr1	1061513	1062147	635	13	60.72	9.56
chr1	1098296	1098984	689	13	56.66	8.37
chr1	1102171	1102612	442	12	70.68	13.15
chr1	1923066	1923645	580	11	50.28	8.37
chr1	1923844	1925188	1345	48	284.19	15.54
chr1	1939450	1940249	800	16	70	8.37
chr1	1941054	1942077	1024	26	127.69	11.96
chr1	1942243	1942850	608	13	62.91	10.76
chr1	1966693	1967214	522	11	54.81	10.76
chr1	1970303	1971553	1251	29	130.56	13.15
chr1	2049083	2049647	565	12	58.87	8.37
chr1	2536276	2536769	494	11	57.22	8.37
chr1	2548045	2549959	1915	60	311.23	16.74
chr1	2550414	2551441	1028	28	143.79	17.93
chr1	2695499	2696068	570	11	51.02	8.37
chr1	2696799	2697554	756	17	81.03	10.76
chr1	2953414	2953959	546	11	52.86	8.37
chr1	2954372	2954940	569	11	51.09	7.17
chr1	2972885	2973779	895	19	84.63	10.76
chr1	2977806	2979164	1359	38	192.82	13.15
chr1	2979172	2979749	578	11	50.42	8.37
chr1	2980377	2981179	803	22	117.05	16.74
chr1	3060656	3061228	573	11	50.79	8.37
chr1	3061832	3063237	1406	57	362.55	23.91
chr1	3065866	3066527	662	13	58.64	9.56
chr1	3079020	3079796	777	15	64.52	9.56
chr1	3080118	3082278	2161	51	220.36	14.35
chr1	3088582	3091178	2597	83	441.65	14.35
chr1	3153322	3154891	1570	42	204.19	14.35
chr1	3299003	3300159	1157	45	282.97	16.74
chr1	3300986	3301518	533	11	53.9	8.37
chr1	3516882	3517532	651	15	74.68	13.15
chr1	3518625	3519619	995	22	98.96	10.76
chr1	3556562	3558870	2309	73	387.77	19.13
chr1	3558924	3559437	514	11	55.48	10.76
chr1	3559510	3560484	975	36	222.76	20.32
chr1	3560699	3561471	773	15	57.8	10.76
chr1	3561815	3562403	589	12	56.92	9.56
chr1	3562936	3563481	546	11	52.86	8.37
chr1	3942185	3942778	594	12	56.52	7.17
chr1	4098034	4098647	614	13	62.41	9.56
chr1	4484975	4485540	566	12	58.78	8.37
chr1	4608043	4608992	950	20	87.67	14.35
chr1	4609444	4611533	2090	55	258.49	11.96
chr1	4612901	4614078	1178	31	153.29	11.96
chr1	4616329	4617659	1331	40	213.12	14.35
chr1	4618201	4619532	1332	31	138.91	10.76
chr1	4632755	4633433	679	14	64.67	8.37
chr1	4669787	4670438	652	15	74.59	13.15
chr1	4670719	4671370	652	14	66.86	13.15
chr1	5406934	5407947	1014	24	112.7	10.76
chr1	5652533	5653246	714	14	61.98	10.76
chr1	5654092	5654755	664	15	73.53	10.76
chr1	5754065	5754713	649	15	74.86	9.56
chr1	5780367	5781144	778	18	86.87	9.56
chr1	6160758	6162088	1331	44	248.89	21.52
chr1	6163250	6164068	819	22	115.36	10.76
chr1	6189411	6190492	1082	24	106.83	10.76
chr1	6221670	6222398	729	23	125.43	16.74
chr1	6222685	6224567	1883	86	577.3	22.72
chr1	6225343	6227948	2606	86	458.46	21.52
chr1	6232487	6232999	513	11	55.57	10.76
chr1	6397757	6398282	526	11	54.48	8.37
chr1	6399015	6400261	1247	27	115.8	10.76
chr1	6400568	6401751	1184	30	144.56	10.76
chr1	6431658	6432678	1021	30	161.64	13.15
chr1	6437407	6438004	598	12	56.21	9.56
chr1	6441909	6442532	624	12	54.24	9.56
chr1	6466300	6467196	897	18	77.16	10.76
chr1	6467321	6467942	622	13	61.76	9.56
chr1	6468470	6468940	471	16	103.51	14.35
chr1	6478782	6479432	651	15	74.68	13.15
chr1	6480655	6481372	718	13	54.64	9.56
chr1	6483886	6484475	590	12	56.84	9.56
chr1	6916695	6917279	585	13	64.87	11.96
chr1	6917329	6918681	1353	42	228.13	17.93
chr1	6950107	6950707	601	14	71.31	11.96
chr1	6950764	6952097	1334	32	146.48	11.96
chr1	7078159	7078829	671	14	65.31	8.37
chr1	7191129	7191674	546	11	52.86	8.37
chr1	7218974	7219537	564	11	51.47	8.37
chr1	7230262	7230812	551	12	60.05	9.56
chr1	7265492	7266179	688	14	63.96	9.56
chr1	7281218	7281848	631	14	68.64	10.76
chr1	7362189	7362773	585	12	57.23	9.56
chr1	7518482	7519040	559	11	51.85	8.37
chr1	7536455	7537336	882	26	142.73	17.93
chr1	7538120	7538851	732	15	60.67	9.56
chr1	7664222	7664764	543	14	76.94	10.76
chr1	7682770	7683345	576	11	50.57	9.56
chr1	7684469	7685071	603	13	63.33	9.56
chr1	7685391	7686311	921	21	97.6	10.76
chr1	7688199	7689618	1420	38	186.45	13.15
chr1	7922440	7923109	670	14	65.39	9.56
chr1	7924944	7925511	568	11	51.17	8.37
chr1	8006419	8008462	2044	124	964.72	35.87
chr1	8062719	8063201	483	11	58.21	10.76
chr1	8116877	8117443	567	11	51.24	8.37
chr1	8118286	8118863	578	11	50.42	7.17
chr1	8137202	8138558	1357	29	121.82	11.96
chr1	8194257	8195269	1013	26	128.77	10.76
chr1	8196192	8196855	664	15	73.53	11.96
chr1	8199321	8200035	715	16	76.85	13.15
chr1	8200766	8201619	854	18	80.47	10.76
chr1	8232212	8232861	650	13	59.55	9.56
chr1	8298855	8299548	694	16	70.97	9.56
chr1	8299832	8300295	464	11	59.99	9.56
chr1	8300758	8301640	883	23	117.11	9.56
chr1	8608380	8609211	832	23	122.43	14.35
chr1	8610222	8612787	2566	81	427.64	14.35
chr1	8613201	8613722	522	11	54.81	8.37
chr1	8866056	8866608	553	14	75.92	9.56
chr1	8867522	8868190	669	15	73.09	10.76
chr1	8869368	8870070	703	15	62.81	11.96
chr1	8870416	8871099	684	12	50.05	8.37
chr1	8871580	8872280	701	17	85.99	10.76
chr1	8874048	8874580	533	11	53.9	9.56
chr1	8908189	8908765	577	11	50.5	8.37
chr1	9057396	9057995	600	12	56.05	8.37
chr1	9058820	9059413	594	12	56.52	9.56
chr1	9072450	9073023	574	11	50.72	9.56
chr1	9074241	9074812	572	11	50.87	7.17
chr1	9181632	9184338	2707	90	490.87	23.91
chr1	9184472	9187241	2770	95	528.4	19.13
chr1	9276355	9277315	961	31	177.78	16.74
chr1	9632292	9632718	427	11	63.71	10.76
chr1	9633477	9634385	909	27	148.36	21.52
chr1	9634744	9635352	609	12	55.36	7.17
chr1	9635402	9636274	873	31	189.58	20.32
chr1	9636280	9637419	1140	30	148.89	13.15
chr1	9672627	9673279	653	12	52.16	11.96
chr1	9805203	9805953	751	15	66.45	9.56
chr1	9978919	9979828	910	40	273.38	20.32
chr1	9981105	9981897	793	17	77.92	11.96
chr1	10678761	10679584	824	18	82.91	9.56
chr1	10692720	10693633	914	22	106.04	9.56
chr1	10700980	10701618	639	14	67.95	9.56
chr1	10701798	10703464	1667	47	235.75	14.35
chr1	10703505	10704177	673	15	72.75	11.96
chr1	10770316	10771152	837	25	139.19	15.54
chr1	10773309	10773917	609	12	55.36	8.37
chr1	10773935	10776488	2554	78	402.67	15.54
chr1	10776757	10777349	593	12	56.6	7.17
chr1	10777729	10778414	686	13	56.88	8.37
chr1	10779648	10781328	1681	54	295.16	15.54
chr1	10784844	10785354	511	11	55.74	9.56
chr1	10817200	10817708	509	11	55.91	9.56
chr1	10846305	10847950	1646	46	229.57	13.15
chr1	10850102	10850711	610	12	55.29	8.37
chr1	10871650	10873413	1764	63	367.1	16.74
chr1	10962727	10963419	693	19	103.38	11.96
chr1	11320849	11321702	854	18	80.47	10.76
chr1	11321884	11322579	696	13	56.16	8.37
chr1	11322854	11323425	572	11	50.87	9.56
chr1	11332859	11333860	1002	22	98.38	10.76
chr1	11364586	11365082	497	11	56.95	9.56
chr1	11366356	11367454	1099	27	128.59	11.96
chr1	11370120	11370880	761	17	80.6	10.76
chr1	11373790	11374973	1184	30	144.56	11.96
chr1	11375881	11376632	752	16	73.75	11.96
chr1	11425272	11426056	785	17	78.58	11.96
chr1	11426728	11427264	537	11	53.58	8.37
chr1	11428657	11429439	783	15	57.13	8.37
chr1	11439870	11440798	929	19	81.97	13.15
chr1	11458819	11459664	846	17	73.77	11.96
chr1	11460267	11460886	620	15	77.55	13.15
chr1	11462685	11463418	734	15	67.75	10.76
chr1	11464099	11464825	727	15	68.3	9.56
chr1	11482507	11483070	564	12	58.95	9.56
chr1	11523076	11523643	568	11	51.17	9.56
chr1	11539169	11539857	689	14	63.89	9.56
chr1	11540042	11541333	1292	31	142.45	10.76
chr1	11541638	11542247	610	15	78.51	11.96
chr1	11566323	11566802	480	11	58.49	9.56
chr1	11569638	11570589	952	21	94.97	15.54
chr1	11574039	11574686	648	12	52.51	8.37
chr1	11670333	11670904	572	11	50.87	9.56
chr1	11671048	11671587	540	12	61	10.76
chr1	11671963	11674351	2389	82	459.12	22.72
chr1	11674458	11677644	3187	102	529.84	15.54
chr1	11680671	11681220	550	12	60.13	8.37
chr1	11684536	11685531	996	33	191.56	17.93
chr1	11686433	11687485	1053	26	124.92	11.96
chr1	11687809	11688659	851	18	80.71	11.96
chr1	11839932	11841373	1442	35	160.2	11.96
chr1	11841862	11842477	616	12	54.83	8.37
chr1	11844356	11845036	681	21	122.31	14.35
chr1	11879783	11880472	690	15	71.3	8.37
chr1	11880560	11882460	1901	49	228.44	16.74
chr1	12045418	12047632	2215	73	399.44	16.74
chr1	12048255	12048783	529	12	61.98	8.37
chr1	12135044	12135774	731	18	91.2	11.96
chr1	12147095	12147667	573	11	50.79	11.96
chr1	12147864	12148398	535	12	53.74	9.56
chr1	12461855	12462437	583	11	50.06	8.37
chr1	12576772	12577920	1149	35	190.55	15.54
chr1	12645010	12645522	513	11	55.57	10.76
chr1	12645639	12646154	516	12	63.17	8.37
chr1	13710205	13711323	1119	22	89.36	8.37
chr1	13711360	13712550	1191	33	168.58	13.15
chr1	13714326	13714845	520	11	54.98	9.56
chr1	13716581	13717253	673	14	65.15	9.56
chr1	13780903	13784410	3508	105	527.22	15.54
chr1	14088143	14089400	1258	31	145.56	9.56
chr1	14089748	14090305	558	11	51.93	10.76
chr1	14090627	14092085	1459	47	259.85	14.35
chr1	14092293	14093324	1032	29	151.81	14.35
chr1	14304078	14304760	683	13	57.09	11.96
chr1	14462851	14463471	621	13	61.84	8.37
chr1	14790949	14791504	556	15	84.04	10.76
chr1	14795367	14797683	2317	77	422.72	19.13
chr1	14798129	14800768	2640	108	672.21	21.52
chr1	14801543	14802156	614	14	70.13	10.76
chr1	14873201	14873890	690	14	56.59	9.56
chr1	14899564	14900189	626	13	61.44	9.56
chr1	14938137	14940864	2728	59	233.51	10.76
chr1	14963546	14964123	578	11	50.42	8.37
chr1	15042210	15042806	597	12	56.29	10.76
chr1	15043358	15043887	530	12	61.89	8.37
chr1	15045555	15046228	674	12	50.72	7.17
chr1	15054573	15055155	583	11	50.06	9.56
chr1	15074909	15075742	834	19	89.72	10.76
chr1	15121906	15122584	679	15	72.23	11.96
chr1	15124113	15125671	1559	50	274.38	15.54
chr1	15288975	15289862	888	21	100.52	11.96
chr1	15349430	15350078	649	14	67.11	9.56
chr1	15350900	15351495	596	12	56.37	7.17
chr1	15353115	15353990	876	24	126.19	15.54
chr1	15472703	15473431	729	18	91.4	13.15
chr1	15955121	15956961	1841	53	267.73	15.54
chr1	15956999	15957564	566	18	109.49	13.15
chr1	15958151	15959134	984	23	107.57	14.35
chr1	15959447	15959976	530	11	54.15	7.17
chr1	15960755	15961294	540	11	53.34	10.76
chr1	15995251	15996180	930	24	120.63	11.96
chr1	15998015	15999682	1668	38	163.56	10.76
chr1	16271264	16271827	564	12	58.95	10.76
chr1	16289086	16289848	763	19	96.23	10.76
chr1	16298315	16299113	799	16	70.07	11.96
chr1	16306064	16306633	570	12	58.45	9.56
chr1	16319875	16320506	632	15	76.42	9.56
chr1	16339182	16339805	624	12	54.24	9.56
chr1	16340817	16341540	724	15	68.53	11.96
chr1	16345595	16346511	917	18	75.68	10.76
chr1	16348941	16349536	596	13	63.92	8.37
chr1	16351643	16353423	1781	43	192.1	10.76
chr1	16354205	16357787	3583	113	579.47	23.91
chr1	16360317	16361238	922	21	97.52	10.76
chr1	16367634	16368966	1333	40	212.89	16.74
chr1	16376117	16377345	1229	27	117.26	9.56
chr1	16378102	16378699	598	12	56.21	8.37
chr1	16425440	16426136	697	17	86.37	9.56
chr1	16426473	16427058	586	12	57.15	8.37
chr1	16730895	16731672	778	15	64.45	11.96
chr1	16733961	16734694	734	17	82.96	9.56
chr1	16763417	16763983	567	11	51.24	9.56
chr1	16765887	16766536	650	13	59.55	9.56
chr1	16808077	16808623	547	11	52.78	9.56
chr1	16809084	16809643	560	13	67.1	10.76
chr1	16810586	16812253	1668	77	522.43	27.5
chr1	16813528	16814284	757	15	65.99	10.76
chr1	16820115	16820910	796	16	70.3	10.76
chr1	16890110	16891469	1360	46	263.46	15.54
chr1	16891783	16893244	1462	37	174.19	16.74
chr1	16894344	16895256	913	28	156.72	16.74
chr1	16896179	16896924	746	14	52.78	10.76
chr1	16897187	16898384	1198	47	296.3	22.72
chr1	16898535	16899142	608	13	62.91	11.96
chr1	16899833	16901874	2042	92	611.06	32.28
chr1	16905567	16906414	848	25	137.9	16.74
chr1	16926005	16926908	904	25	131.66	10.76
chr1	16971361	16972161	801	21	108.87	11.96
chr1	17072579	17073261	683	13	57.09	13.15
chr1	17179449	17180021	573	11	50.79	7.17
chr1	17180284	17180838	555	11	52.16	9.56
chr1	17317205	17318253	1049	30	158.49	14.35
chr1	17342085	17342642	558	12	59.45	9.56
chr1	17346639	17347274	636	14	60.64	10.76
chr1	17347542	17348348	807	16	69.47	11.96
chr1	17348492	17349378	887	20	92.84	14.35
chr1	17412250	17412847	598	12	56.21	10.76
chr1	17480776	17481381	606	13	63.08	8.37
chr1	17737039	17738642	1604	54	304.99	22.72
chr1	17738826	17740240	1415	35	162.68	13.15
chr1	18009629	18010187	559	12	51.85	8.37
chr1	18115115	18116074	960	20	86.88	11.96
chr1	18304286	18304908	623	12	54.31	10.76
chr1	18305271	18306785	1515	46	244.18	17.93
chr1	18307305	18309161	1857	60	327.18	14.35
chr1	18309555	18311875	2321	67	334.23	11.96
chr1	18318070	18318878	809	20	99.9	9.56
chr1	18396112	18397214	1103	24	105.11	10.76
chr1	18485215	18485732	518	11	55.14	8.37
chr1	18532052	18532634	583	11	50.06	7.17
chr1	18584903	18585548	646	13	59.86	8.37
chr1	18639507	18640209	703	14	62.81	10.76
chr1	18657505	18658038	534	12	61.53	10.76
chr1	18723299	18723945	647	13	59.78	10.76
chr1	18733816	18734496	681	14	64.51	8.37
chr1	18740876	18741739	864	20	94.84	13.15
chr1	18756648	18758469	1822	51	252.88	13.15
chr1	18760119	18760765	647	15	75.04	11.96
chr1	18766671	18767570	900	16	62.99	10.76
chr1	18786056	18786684	629	12	53.87	7.17
chr1	18810322	18811009	688	15	71.47	9.56
chr1	18823368	18825184	1817	49	236.76	11.96
chr1	18826251	18829799	3549	137	815.69	29.89
chr1	18830540	18835812	5273	184	1015.98	21.52
chr1	18835860	18845949	10090	399	2369.69	27.5
chr1	18846137	18847632	1496	61	387.97	19.13
chr1	18847766	18854227	6462	182	857.38	16.74
chr1	18857589	18858750	1162	40	225.03	25.11
chr1	18863691	18864476	786	19	94.04	10.76
chr1	18866571	18867147	577	11	50.5	9.56
chr1	18867160	18867640	481	12	66.55	9.56
chr1	18873826	18875436	1611	44	216.53	13.15
chr1	18883140	18883663	524	12	62.44	9.56
chr1	18883992	18884898	907	21	98.82	13.15
chr1	18894469	18895071	603	14	63.33	9.56
chr1	18902570	18903016	447	11	61.65	10.76
chr1	18913687	18914264	578	11	50.42	7.17
chr1	18914484	18915146	663	14	65.95	9.56
chr1	18915189	18915994	806	20	100.18	11.96
chr1	18916089	18917449	1361	55	349.84	19.13
chr1	18918808	18919357	550	13	68.03	9.56
chr1	18921507	18922157	651	12	52.3	8.37
chr1	18922326	18922901	576	12	57.96	10.76
chr1	18923028	18923632	605	12	55.67	9.56
chr1	18950269	18950844	576	11	50.57	8.37
chr1	18968505	18969112	608	12	55.44	9.56
chr1	19004456	19005137	682	14	64.43	10.76
chr1	19007388	19008114	727	14	61.03	9.56
chr1	19017552	19018250	699	20	111.33	10.76
chr1	19032035	19032683	649	14	67.11	9.56
chr1	19157009	19157772	764	16	72.79	8.37
chr1	19157855	19158454	600	12	56.05	11.96
chr1	19162421	19162978	558	11	51.93	8.37
chr1	19178838	19179401	564	12	58.95	9.56
chr1	19181683	19182598	916	19	82.97	10.76
chr1	19223019	19223598	580	12	57.64	8.37
chr1	19234408	19234972	565	11	51.4	8.37
chr1	19237073	19237677	605	12	55.67	9.56
chr1	19237985	19238584	600	13	63.58	10.76
chr1	19241091	19242129	1039	26	126.25	13.15
chr1	19253753	19254307	555	11	52.16	7.17
chr1	19254480	19255167	688	18	95.47	10.76
chr1	19692759	19693334	576	11	50.57	7.17
chr1	19862977	19864490	1514	37	169.34	11.96
chr1	19864934	19867210	2277	66	330.55	13.15
chr1	20036144	20036713	570	11	51.02	8.37
chr1	20045351	20046004	654	18	99.07	11.96
chr1	20062119	20062577	459	12	68.83	11.96
chr1	20064251	20065531	1281	30	135.65	9.56
chr1	20175209	20175873	665	13	58.41	8.37
chr1	20178131	20178794	664	14	58.49	8.37
chr1	20227569	20228097	529	12	61.98	9.56
chr1	20237966	20238548	583	12	57.39	8.37
chr1	20272033	20272816	784	14	57.07	11.96
chr1	20282459	20283075	617	13	62.17	8.37
chr1	20291539	20292242	704	15	62.74	10.76
chr1	20317706	20318307	602	12	55.9	7.17
chr1	20417667	20418409	743	16	74.49	13.15
chr1	20420688	20421811	1124	25	110.88	8.37
chr1	20425214	20426191	978	22	100.38	13.15
chr1	20433657	20434170	514	11	55.48	9.56
chr1	20435621	20436985	1365	34	159.4	11.96
chr1	20439420	20440000	581	11	50.2	8.37
chr1	20441550	20442125	576	11	50.57	8.37
chr1	20442879	20443457	579	11	50.35	7.17
chr1	20443490	20443999	510	11	55.82	8.37
chr1	20445538	20446114	577	11	50.5	8.37
chr1	20456683	20457290	608	13	62.91	10.76
chr1	20459193	20460117	925	19	82.28	10.76
chr1	20485079	20486075	997	21	91.34	10.76
chr1	20488465	20489842	1378	43	234	17.93
chr1	20489862	20490588	727	29	182.16	22.72
chr1	20490655	20492859	2205	60	287.88	13.15
chr1	20520774	20521418	645	13	59.94	10.76
chr1	20543328	20543870	543	11	53.1	7.17
chr1	20551893	20552533	641	12	53	8.37
chr1	20556149	20557037	889	19	85.11	11.96
chr1	20561339	20562002	664	13	58.49	10.76
chr1	20563526	20565443	1918	59	310.88	17.93
chr1	20566124	20567005	882	26	142.73	14.35
chr1	20570777	20571354	578	11	50.42	7.17
chr1	20583260	20583937	678	14	64.75	9.56
chr1	20584034	20584897	864	19	87.16	10.76
chr1	20591805	20592475	671	14	65.31	9.56
chr1	20603298	20605157	1860	40	162.87	11.96
chr1	20620742	20621757	1016	25	120.42	13.15
chr1	20651394	20652046	653	15	74.5	9.56
chr1	20653703	20654470	768	14	58.14	9.56
chr1	20673391	20674179	789	18	85.9	10.76
chr1	20675003	20676522	1520	40	192.81	14.35
chr1	20679415	20679982	568	11	51.17	9.56
chr1	20680773	20684298	3526	112	586.32	16.74
chr1	20685680	20688092	2413	101	639.18	17.93
chr1	20749887	20751811	1925	60	318.86	15.54
chr1	20752079	20752930	852	23	120.3	11.96
chr1	20753062	20755564	2503	71	348.36	13.15
chr1	20768597	20769116	520	11	54.98	9.56
chr1	20787594	20789645	2052	59	295.67	15.54
chr1	20915589	20916359	771	21	112	14.35
chr1	20918832	20919470	639	14	67.95	11.96
chr1	20929652	20930713	1062	31	165.66	13.15
chr1	21583113	21583748	636	12	53.36	8.37
chr1	21626475	21627158	684	14	64.28	10.76
chr1	21736933	21737515	583	11	50.06	9.56
chr1	22339680	22341744	2065	75	438.14	21.52
chr1	22342585	22344969	2385	88	515.98	23.91
chr1	22345351	22345978	628	15	76.79	13.15
chr1	22390243	22390740	498	11	56.87	10.76
chr1	22408317	22409584	1268	30	136.8	9.56
chr1	22419626	22420185	560	11	51.78	10.76
chr1	22433949	22434582	634	17	92.7	14.35
chr1	22494228	22494967	740	15	67.28	14.35
chr1	22496793	22497447	655	13	59.17	10.76
chr1	22505267	22505932	666	14	65.71	9.56
chr1	22507557	22508099	543	11	53.1	7.17
chr1	22519866	22520444	579	12	57.72	9.56
chr1	22546602	22547982	1381	41	216.07	16.74
chr1	22548239	22551985	3747	131	730.49	19.13
chr1	22558295	22558946	652	14	66.86	9.56
chr1	22586578	22587213	636	12	53.36	8.37
chr1	22594427	22595096	670	13	58.04	8.37
chr1	22595786	22596355	570	11	51.02	9.56
chr1	22597575	22599483	1909	45	196.26	11.96
chr1	22756398	22757018	621	12	54.46	7.17
chr1	22759175	22760579	1405	37	179.75	10.76
chr1	22760885	22762566	1682	60	350.28	19.13
chr1	22763368	22764525	1158	28	131.06	13.15
chr1	22825630	22826202	573	11	50.79	9.56
chr1	22827856	22828433	578	11	50.42	8.37
chr1	22828623	22829307	685	15	71.72	11.96
chr1	22853652	22854310	659	13	58.87	9.56
chr1	22910711	22913103	2393	60	269.55	11.96
chr1	22914313	22915005	693	14	63.58	8.37
chr1	22916190	22917238	1049	28	141.61	13.15
chr1	22976661	22977211	551	12	60.05	7.17
chr1	23047653	23048547	895	18	77.31	10.76
chr1	23077049	23077633	585	12	57.23	7.17
chr1	23102482	23103064	583	11	50.06	7.17
chr1	23114344	23115043	700	16	78.16	13.15
chr1	23151674	23152607	934	27	145.49	14.35
chr1	23152826	23154640	1815	50	245.25	17.93
chr1	23167080	23167788	709	14	62.36	10.76
chr1	23168092	23169502	1411	27	103.63	11.96
chr1	23296148	23296728	581	11	50.2	10.76
chr1	23409979	23410706	728	14	60.95	9.56
chr1	23416744	23417337	594	16	88.48	11.96
chr1	23622053	23622976	924	21	97.34	11.96
chr1	23624203	23624789	587	17	97.92	11.96
chr1	23626527	23627266	740	16	74.73	8.37
chr1	23654663	23655353	691	15	71.22	10.76
chr1	23679244	23679816	573	11	50.79	10.76
chr1	23681200	23681746	547	11	52.78	8.37
chr1	23681979	23682668	690	18	95.27	10.76
chr1	23683722	23685063	1342	30	130.46	11.96
chr1	23752390	23753745	1356	51	311.3	21.52
chr1	23754192	23758312	4121	139	754.61	20.32
chr1	23758762	23762268	3507	136	812.33	20.32
chr1	23762355	23763667	1313	47	279.23	15.54
chr1	23766683	23769160	2478	71	351.05	20.32
chr1	23772582	23773198	617	14	69.86	10.76
chr1	23775716	23776273	558	11	51.93	8.37
chr1	23817508	23820284	2777	94	518.3	15.54
chr1	23850207	23850832	626	13	61.44	9.56
chr1	23881324	23881903	580	11	50.28	8.37
chr1	24101083	24101945	863	19	87.24	11.96
chr1	24102366	24103229	864	16	65.4	10.76
chr1	24309551	24310148	598	12	56.21	7.17
chr1	24312794	24313622	829	19	90.15	11.96
chr1	24349806	24351175	1370	43	234.97	15.54
chr1	24372948	24373441	494	11	57.22	8.37
chr1	24373525	24374108	584	13	64.96	8.37
chr1	24384401	24386366	1966	68	386.16	20.32
chr1	24386377	24387309	933	32	190.68	17.93
chr1	24388842	24389391	550	11	52.55	7.17
chr1	24413994	24414645	652	13	59.4	8.37
chr1	24455545	24456307	763	16	72.86	10.76
chr1	24497822	24498388	567	11	51.24	10.76
chr1	24505746	24506399	654	13	59.24	8.37
chr1	24516163	24521164	5002	178	997.02	21.52
chr1	24521177	24527634	6458	225	1226.88	20.32
chr1	24528284	24529664	1381	33	150.06	11.96
chr1	24529823	24530348	526	11	54.48	9.56
chr1	24531231	24532586	1356	38	193.14	14.35
chr1	24532649	24533540	892	23	116.21	14.35
chr1	24537416	24538306	891	21	100.25	11.96
chr1	24547629	24548206	578	11	50.42	7.17
chr1	24702347	24703460	1114	30	151.54	13.15
chr1	24754339	24754920	582	11	50.13	7.17
chr1	24755373	24757843	2471	64	294.03	11.96
chr1	25228347	25228926	580	11	50.28	8.37
chr1	25294740	25295365	626	13	61.44	7.17
chr1	25817050	25819968	2919	113	677.82	20.32
chr1	25839546	25840161	616	14	69.95	9.56
chr1	25841125	25841721	597	15	79.79	10.76
chr1	25847126	25847683	558	11	51.93	8.37
chr1	26243385	26245152	1768	54	284.65	15.54
chr1	26245373	26246893	1521	43	217.66	13.15
chr1	26282747	26283626	880	20	93.44	10.76
chr1	26301228	26301856	629	12	53.87	8.37
chr1	26607716	26612932	5217	178	968.19	20.32
chr1	26613257	26614963	1707	44	206.92	9.56
chr1	27158077	27160456	2380	83	469.59	15.54
chr1	27160646	27161632	987	28	148.2	14.35
chr1	27192051	27192846	796	20	101.15	13.15
chr1	27193233	27194832	1600	56	324.06	22.72
chr1	27832617	27833227	611	14	70.4	10.76
chr1	27833435	27834952	1518	39	184.89	15.54
chr1	27899507	27900087	581	12	57.56	9.56
chr1	27915262	27915977	716	14	61.84	9.56
chr1	28790458	28791438	981	29	157.52	13.15
chr1	28791764	28792622	859	18	80.08	13.15
chr1	29009621	29011119	1499	58	357.82	17.93
chr1	29011303	29014563	3261	102	529.79	16.74
chr1	29014566	29015458	893	20	92.33	11.96
chr1	29037053	29037664	612	12	55.14	8.37
chr1	29054578	29055188	611	16	86.68	10.76
chr1	29061126	29061969	844	18	81.28	13.15
chr1	29323059	29323949	891	24	124.6	13.15
chr1	29326359	29327185	827	15	61.03	10.76
chr1	29435784	29437038	1255	54	357.38	21.52
chr1	29437129	29439244	2116	69	375.8	16.74
chr1	29457216	29458661	1446	36	167.72	11.96
chr1	29459280	29460704	1425	35	161.75	14.35
chr1	29534697	29535504	808	15	62.32	10.76
chr1	29570334	29571107	774	18	87.22	11.96
chr1	29582828	29583462	635	12	53.44	10.76
chr1	29585955	29586710	756	16	73.43	9.56
chr1	29642803	29643431	629	12	53.87	9.56
chr1	29676296	29676886	591	14	72.23	9.56
chr1	29678062	29679179	1118	30	151.12	11.96
chr1	29997623	29998216	594	12	56.52	7.17
chr1	30142135	30142724	590	12	56.84	9.56
chr1	30352941	30354524	1584	37	163.11	14.35
chr1	30409228	30409667	440	12	70.9	10.76
chr1	30421416	30421986	571	12	58.37	9.56
chr1	30441927	30442555	629	13	53.87	9.56
chr1	30455924	30456628	705	16	77.72	9.56
chr1	30479242	30479804	563	11	51.55	11.96
chr1	30540785	30541332	548	11	52.71	8.37
chr1	30588435	30589663	1229	36	190.03	15.54
chr1	30639758	30640334	577	11	50.5	7.17
chr1	30749420	30749999	580	11	50.28	8.37
chr1	30819502	30820179	678	14	64.75	8.37
chr1	30854308	30854879	572	11	50.87	7.17
chr1	30867415	30867987	573	11	50.79	9.56
chr1	30886073	30886622	550	11	52.55	8.37
chr1	30888880	30889890	1011	25	120.89	10.76
chr1	30921021	30921774	754	15	66.22	10.76
chr1	30928852	30930828	1977	64	348.18	21.52
chr1	30930879	30931496	618	15	77.74	10.76
chr1	30932053	30932806	754	13	52.26	8.37
chr1	31061881	31063242	1362	35	167.71	14.35
chr1	31070523	31071216	694	18	94.86	11.96
chr1	31083094	31084370	1277	27	113.43	10.76
chr1	31085928	31087423	1496	41	203.51	10.76
chr1	31088231	31088796	566	11	51.32	7.17
chr1	31089967	31090754	788	18	85.98	9.56
chr1	31091141	31091897	757	17	80.94	10.76
chr1	31093161	31093755	595	14	71.86	9.56
chr1	31481260	31481880	621	15	77.45	10.76
chr1	31482038	31482774	737	16	67.52	8.37
chr1	31483261	31485107	1847	73	451.25	26.3
chr1	31485149	31487404	2256	71	376.44	21.52
chr1	31489910	31490581	672	16	80.7	9.56
chr1	31657425	31658492	1068	30	156.41	10.76
chr1	31659931	31660468	538	11	53.5	8.37
chr1	31706867	31707748	882	18	78.29	10.76
chr1	31809414	31809903	490	12	65.66	10.76
chr1	31854401	31855638	1238	31	147.43	10.76
chr1	31940865	31942472	1608	48	250.86	13.15
chr1	31942733	31943862	1130	35	192.83	17.93
chr1	31956666	31957368	703	15	62.81	9.56
chr1	31997878	31998808	931	29	163.46	16.74
chr1	31998986	32000614	1629	55	301.74	19.13
chr1	32001415	32002177	763	18	88.22	10.76
chr1	32002442	32003794	1353	55	351.13	29.89
chr1	32008916	32014051	5136	194	1129.47	31.08
chr1	32664146	32665442	1297	32	149.86	11.96
chr1	32667726	32668496	771	19	95.46	11.96
chr1	32677824	32678338	515	11	55.4	10.76
chr1	32702181	32703225	1045	37	222.26	15.54
chr1	32703497	32705371	1875	50	239.11	11.96
chr1	32776649	32777449	801	22	117.27	14.35
chr1	33107867	33108621	755	17	81.11	9.56
chr1	33109012	33110445	1434	64	429.13	26.3
chr1	33128034	33128903	870	20	94.31	9.56
chr1	33129240	33131312	2073	57	276.64	13.15
chr1	33138554	33141088	2535	74	370.31	16.74
chr1	33142406	33142911	506	11	56.17	9.56
chr1	33161792	33162474	683	14	64.35	9.56
chr1	33162556	33164520	1965	52	246.46	13.15
chr1	33209424	33211387	1964	62	331.89	22.72
chr1	33319708	33320488	781	19	94.51	15.54
chr1	33320996	33321903	908	18	76.34	10.76
chr1	33462340	33462895	556	11	52.08	10.76
chr1	33544344	33544993	650	16	82.78	11.96
chr1	33776560	33777079	520	11	54.98	9.56
chr1	33797732	33798385	654	14	66.69	11.96
chr1	33798618	33799226	609	12	55.36	8.37
chr1	33853723	33854328	606	13	63.08	9.56
chr1	33972133	33972672	540	11	53.34	8.37
chr1	34401010	34402198	1189	47	297.71	19.13
chr1	34403388	34404529	1142	37	200.29	17.93
chr1	34404980	34405820	841	21	104.9	13.15
chr1	34405928	34406533	606	12	55.59	8.37
chr1	34409043	34409570	528	11	54.31	7.17
chr1	34414462	34415065	604	16	87.42	11.96
chr1	34417129	34417651	523	12	62.53	10.76
chr1	34482189	34482803	615	12	54.91	7.17
chr1	34849234	34851209	1976	51	237.29	15.54
chr1	34882857	34883426	570	11	51.02	9.56
chr1	34891426	34892474	1049	24	109.62	9.56
chr1	34892824	34893331	508	11	55.99	9.56
chr1	34903236	34905200	1965	38	141.04	13.15
chr1	34916123	34916685	563	11	51.55	8.37
chr1	34927351	34927935	585	13	64.87	8.37
chr1	34992233	34992739	507	11	56.08	9.56
chr1	35008210	35008667	458	11	60.57	10.76
chr1	35018360	35019467	1108	23	97.34	10.76
chr1	35019856	35020779	924	21	97.34	11.96
chr1	35031475	35032122	648	17	91.24	10.76
chr1	35110568	35111146	579	13	65.39	10.76
chr1	35119045	35119916	872	21	101.98	13.15
chr1	35121240	35122089	850	18	80.79	11.96
chr1	35122472	35123628	1157	34	180.88	15.54
chr1	35124455	35125164	710	17	85.15	13.15
chr1	35125589	35126240	652	12	52.23	8.37
chr1	35138422	35138988	567	11	51.24	8.37
chr1	35164317	35165423	1107	26	120	9.56
chr1	35165726	35167681	1956	64	350.82	23.91
chr1	35168064	35168676	613	13	62.49	9.56
chr1	35168689	35169629	941	31	171.23	16.74
chr1	35169970	35170758	789	17	78.25	9.56
chr1	35174882	35175446	565	12	58.87	9.56
chr1	35178407	35178933	527	11	54.4	9.56
chr1	35180770	35181464	695	16	78.6	9.56
chr1	35197483	35198048	566	11	51.32	9.56
chr1	35201562	35202109	548	11	52.71	10.76
chr1	35810197	35811547	1351	46	264.66	15.54
chr1	35814485	35815214	730	16	75.57	10.76
chr1	35883694	35884301	608	12	55.44	7.17
chr1	35935703	35936186	484	11	58.12	9.56
chr1	35936460	35938248	1789	48	231.37	14.35
chr1	35938476	35939455	980	26	132.08	14.35
chr1	35939826	35940619	794	23	126.64	11.96
chr1	35940667	35941879	1213	37	200.62	15.54
chr1	35944577	35946037	1461	44	232.98	14.35
chr1	35946102	35947807	1706	62	365.82	16.74
chr1	36361219	36362376	1158	27	123.26	9.56
chr1	36362463	36363152	690	18	95.27	10.76
chr1	36792763	36793263	501	13	72.88	10.76
chr1	36793427	36794140	714	15	69.33	11.96
chr1	36819986	36820639	654	17	90.62	10.76
chr1	36883437	36884037	601	12	55.98	8.37
chr1	36885426	36886080	655	12	52.02	8.37
chr1	36931997	36932585	589	12	56.92	8.37
chr1	36950690	36951784	1095	22	91.12	10.76
chr1	37008365	37008930	566	15	82.97	10.76
chr1	37008994	37010130	1137	23	95.15	8.37
chr1	37086022	37086538	517	11	55.23	10.76
chr1	37265780	37266424	645	13	59.94	9.56
chr1	37267375	37268368	994	26	130.66	10.76
chr1	37269342	37269854	513	11	55.57	9.56
chr1	37269865	37271145	1281	44	255.48	17.93
chr1	37271565	37272156	592	12	56.68	9.56
chr1	37273133	37276252	3120	119	705.76	22.72
chr1	37276431	37277461	1031	28	143.47	15.54
chr1	37340011	37340599	589	12	56.92	7.17
chr1	37372618	37373182	565	12	58.87	9.56
chr1	37473279	37474251	973	22	100.81	8.37
chr1	37531070	37531638	569	11	51.09	10.76
chr1	37544534	37545161	628	13	61.28	9.56
chr1	37552164	37552734	571	11	50.94	8.37
chr1	37553703	37555400	1698	40	176.24	10.76
chr1	37555462	37556923	1462	49	277.66	15.54
chr1	37556975	37557554	580	13	65.31	10.76
chr1	37601513	37602067	555	11	52.16	7.17
chr1	37633416	37634021	606	12	55.59	8.37
chr1	37639317	37640258	942	23	111.39	14.35
chr1	37641706	37642265	560	11	51.78	9.56
chr1	37664408	37664994	587	13	64.69	8.37
chr1	37666922	37667449	528	11	54.31	7.17
chr1	37853313	37853850	538	11	53.5	8.37
chr1	37855079	37855665	587	13	64.69	8.37
chr1	37868069	37868641	573	12	58.2	8.37
chr1	37869273	37873150	3878	122	632.37	19.13
chr1	37873263	37875170	1908	74	451.64	19.13
chr1	37987871	37988493	623	12	54.31	8.37
chr1	37990023	37991107	1085	40	245.16	16.74
chr1	37991917	37992479	563	11	51.55	8.37
chr1	37993301	37994134	834	23	122.21	14.35
chr1	37994378	37995427	1050	28	141.5	15.54
chr1	37995474	37996025	552	13	67.85	10.76
chr1	37997979	37999135	1157	30	147.19	10.76
chr1	38001336	38004235	2900	80	381.74	19.13
chr1	38004285	38006172	1888	51	246.01	15.54
chr1	38008161	38009162	1002	23	105.99	8.37
chr1	38030342	38031740	1399	38	188.61	15.54
chr1	38033008	38033586	579	12	57.72	8.37
chr1	38280666	38284371	3706	125	680.72	17.93
chr1	38285833	38287495	1663	53	288.42	20.32
chr1	38287553	38288123	571	11	50.94	9.56
chr1	38290228	38290803	576	11	50.57	8.37
chr1	38305426	38305989	564	12	58.95	8.37
chr1	38306024	38307068	1045	29	150.41	11.96
chr1	38331511	38332063	553	12	59.88	8.37
chr1	38340053	38340802	750	13	52.52	9.56
chr1	38348639	38349206	568	11	51.17	8.37
chr1	38371204	38372283	1080	31	163.64	13.15
chr1	38372344	38375547	3204	101	527.79	17.93
chr1	38376468	38377044	577	11	50.5	8.37
chr1	38377699	38379222	1524	45	234.44	16.74
chr1	38379233	38380203	971	24	116.66	10.76
chr1	38381057	38381721	665	15	73.44	10.76
chr1	38397887	38398492	606	12	55.59	7.17
chr1	38426517	38427502	986	24	115.25	11.96
chr1	38428660	38430686	2027	52	240.41	11.96
chr1	38473054	38473659	606	17	95.76	11.96
chr1	38490637	38491203	567	12	58.7	9.56
chr1	38497731	38498397	667	14	65.63	8.37
chr1	38499173	38499742	570	11	51.02	9.56
chr1	38500413	38500959	547	11	52.78	9.56
chr1	38508995	38509619	625	13	61.52	9.56
chr1	38520347	38520904	558	11	51.93	9.56
chr1	38528604	38529180	577	11	50.5	8.37
chr1	38529259	38531607	2349	79	436.83	17.93
chr1	38534250	38534986	737	15	67.52	11.96
chr1	38543961	38544531	571	11	50.94	9.56
chr1	38608933	38609496	564	11	51.47	9.56
chr1	38689073	38689724	652	14	66.86	9.56
chr1	38712536	38716843	4308	152	849.55	17.93
chr1	38718400	38718972	573	13	65.93	8.37
chr1	38720396	38720957	562	11	51.62	7.17
chr1	38724270	38724855	586	13	64.78	10.76
chr1	38736857	38737517	661	12	51.6	9.56
chr1	38738310	38739036	727	14	61.03	9.56
chr1	38746644	38747669	1026	22	96.43	8.37
chr1	38755938	38756650	713	13	54.98	10.76
chr1	38766059	38766697	639	15	75.77	10.76
chr1	38775139	38775662	524	12	62.44	11.96
chr1	38782509	38783256	748	19	97.69	11.96
chr1	38794778	38795336	559	11	51.85	8.37
chr1	38797264	38797903	640	14	67.87	9.56
chr1	38815505	38816894	1390	52	315.92	20.32
chr1	38816970	38818967	1998	66	363.61	21.52
chr1	38829143	38829725	583	12	57.39	8.37
chr1	38830985	38831444	460	11	60.37	8.37
chr1	38837955	38838473	519	11	55.06	8.37
chr1	38887443	38888020	578	12	57.8	10.76
chr1	38888681	38889191	511	12	63.64	11.96
chr1	38897398	38897946	549	11	52.63	10.76
chr1	38900422	38901006	585	12	57.23	9.56
chr1	38901721	38902260	540	11	53.34	8.37
chr1	38943397	38944112	716	13	54.77	8.37
chr1	38958661	38959372	712	15	69.49	9.56
chr1	38960116	38960763	648	13	59.7	7.17
chr1	38964203	38966621	2419	63	291.02	10.76
chr1	38966904	38967675	772	18	87.4	9.56
chr1	38968078	38969072	995	24	114.42	9.56
chr1	38969287	38969869	583	11	50.06	9.56
chr1	38970982	38973262	2281	58	264.18	13.15
chr1	38974296	38974952	657	15	74.15	9.56
chr1	38990758	38991317	560	11	51.78	7.17
chr1	39019998	39023127	3130	84	391.23	11.96
chr1	39025290	39025839	550	11	52.55	9.56
chr1	39027130	39028340	1211	34	174.89	10.76
chr1	39029063	39029605	543	11	53.1	8.37
chr1	39029924	39030614	691	14	63.73	11.96
chr1	39033697	39034610	914	19	83.13	13.15
chr1	39040672	39041711	1040	37	222.96	20.32
chr1	39041734	39042516	783	33	223.34	17.93
chr1	39042593	39043994	1402	58	373.23	23.91
chr1	39044102	39044981	880	22	109.24	15.54
chr1	39048117	39048630	514	11	55.48	10.76
chr1	39049024	39049739	716	13	54.77	8.37
chr1	39055335	39055924	590	12	56.84	8.37
chr1	39057657	39058231	575	11	50.65	8.37
chr1	39063565	39064120	556	11	52.08	9.56
chr1	39318539	39319066	528	11	54.31	8.37
chr1	39320423	39321292	870	22	110.21	14.35
chr1	39321514	39322260	747	18	89.69	10.76
chr1	39728283	39729032	750	14	59.38	10.76
chr1	39730668	39731716	1049	27	133.38	20.32
chr1	39875668	39876249	582	14	73.08	10.76
chr1	39876600	39877689	1090	26	121.52	10.76
chr1	39905889	39906531	643	15	75.41	9.56
chr1	39907190	39907783	594	12	56.52	8.37
chr1	39908255	39910518	2264	67	340.56	13.15
chr1	39910526	39911689	1164	32	163.04	11.96
chr1	39918619	39920635	2017	51	233.38	10.76
chr1	39921459	39922099	641	13	60.25	8.37
chr1	39922811	39923732	922	23	113.28	17.93
chr1	39924916	39925706	791	20	101.64	11.96
chr1	39926771	39927346	576	11	50.57	8.37
chr1	39927972	39928661	690	19	103.71	13.15
chr1	39930244	39932187	1944	74	446.19	29.89
chr1	39932361	39934166	1806	53	271.61	15.54
chr1	39934921	39936503	1583	36	155.59	11.96
chr1	39936853	39937867	1015	29	153.68	19.13
chr1	39965156	39966929	1774	48	232.89	17.93
chr1	39970934	39971624	691	14	63.73	9.56
chr1	40134658	40135417	760	15	65.77	8.37
chr1	40136086	40136656	571	11	50.94	8.37
chr1	40137701	40139440	1740	58	323.91	20.32
chr1	40141402	40142112	711	20	109.98	13.15
chr1	40554145	40555018	874	28	161.53	15.54
chr1	40555689	40556264	576	11	50.57	8.37
chr1	40765884	40766703	820	19	90.95	10.76
chr1	40820711	40821297	587	12	57.07	9.56
chr1	40824344	40825128	785	18	86.25	11.96
chr1	40825356	40825976	621	13	61.84	9.56
chr1	40877469	40878103	635	15	76.14	10.76
chr1	41020096	41020802	707	14	62.51	9.56
chr1	41098804	41099567	764	19	96.13	11.96
chr1	41120899	41121416	518	11	55.14	10.76
chr1	41121460	41122543	1084	46	304.86	25.11
chr1	41125411	41126373	963	23	109.46	14.35
chr1	41128570	41129235	666	15	73.35	13.15
chr1	41192428	41193738	1311	30	133.06	10.76
chr1	41523293	41523833	541	12	60.92	7.17
chr1	41533307	41533974	668	13	58.19	9.56
chr1	41600644	41602684	2041	58	288.39	15.54
chr1	41602904	41603832	929	23	112.61	10.76
chr1	41604939	41606888	1950	54	264.49	13.15
chr1	41609264	41610207	944	24	119.25	14.35
chr1	41613692	41614330	639	16	83.85	9.56
chr1	41614647	41615315	669	12	51.06	9.56
chr1	41617901	41619330	1430	43	227.84	13.15
chr1	41620859	41621480	622	12	54.39	11.96
chr1	41621601	41623663	2063	75	438.43	15.54
chr1	41625117	41625755	639	14	67.95	11.96
chr1	41633587	41634403	817	19	91.21	13.15
chr1	41642205	41642770	566	11	51.32	8.37
chr1	41642991	41643561	571	12	58.37	9.56
chr1	41643655	41644147	493	11	57.31	10.76
chr1	41646733	41647971	1239	27	109.09	8.37
chr1	41648320	41648918	599	12	56.13	8.37
chr1	41672509	41674226	1718	41	182.19	10.76
chr1	41674758	41675556	799	18	85.03	9.56
chr1	41724009	41724633	625	13	61.52	9.56
chr1	41725046	41726115	1070	26	123.34	9.56
chr1	41730086	41730662	577	11	50.5	9.56
chr1	41785114	41785619	506	12	64.11	9.56
chr1	41806569	41807165	597	13	63.83	11.96
chr1	41897425	41900277	2853	93	499.5	21.52
chr1	41976717	41977423	707	16	77.54	9.56
chr1	42064131	42064699	569	11	51.09	9.56
chr1	42066325	42066908	584	12	57.31	8.37
chr1	42085163	42085869	707	16	77.54	9.56
chr1	42090302	42090865	564	11	51.47	7.17
chr1	42095773	42096335	563	11	51.55	7.17
chr1	42097661	42098729	1069	28	139.58	9.56
chr1	42099967	42102594	2628	73	351.88	15.54
chr1	42102642	42103483	842	18	81.44	11.96
chr1	42106646	42107836	1191	34	177.07	14.35
chr1	42110263	42110901	639	12	53.15	11.96
chr1	42112108	42113097	990	22	99.37	11.96
chr1	42117275	42118290	1016	23	104.79	9.56
chr1	42139855	42140396	542	11	53.18	8.37
chr1	42154877	42157967	3091	102	550.68	14.35
chr1	42271860	42272411	552	12	59.96	9.56
chr1	42272574	42273747	1174	39	223.46	15.54
chr1	42294756	42295396	641	12	53	9.56
chr1	42311469	42312060	592	12	56.68	8.37
chr1	42599756	42600328	573	11	50.79	10.76
chr1	42607639	42608793	1155	23	93.83	9.56
chr1	42608854	42609528	675	17	88.5	13.15
chr1	42616741	42617261	521	11	54.89	9.56
chr1	42618173	42618719	547	11	52.78	9.56
chr1	42619428	42621168	1741	58	323.79	15.54
chr1	43382908	43384618	1711	42	190.62	13.15
chr1	43385468	43386003	536	11	53.66	8.37
chr1	43386944	43387518	575	11	50.65	7.17
chr1	43461600	43462268	669	12	51.06	11.96
chr1	43507810	43508390	581	11	50.2	8.37
chr1	43577157	43577757	601	13	63.5	10.76
chr1	43585334	43586715	1382	31	134.66	11.96
chr1	43757354	43758545	1192	39	221.14	15.54
chr1	43759720	43760829	1110	27	127.57	9.56
chr1	43765854	43766436	583	11	50.06	9.56
chr1	43767982	43769162	1181	52	349.71	25.11
chr1	43769780	43771726	1947	42	170.66	10.76
chr1	44389602	44390512	911	19	83.36	10.76
chr1	44643086	44643669	584	14	72.89	9.56
chr1	44644263	44644854	592	14	72.14	10.76
chr1	44645410	44645969	560	13	67.1	10.76
chr1	44646148	44653777	7630	252	1330.21	20.32
chr1	44655167	44655825	659	13	58.87	8.37
chr1	44805064	44805905	842	17	74.07	9.56
chr1	45278933	45279744	812	17	76.39	10.76
chr1	45283113	45285071	1959	46	199.59	9.56
chr1	45285308	45285773	466	11	59.8	9.56
chr1	45441372	45444182	2811	118	744.46	22.72
chr1	45444995	45447222	2228	75	415.98	21.52
chr1	45447773	45448531	759	15	65.84	11.96
chr1	45459745	45460311	567	11	51.24	10.76
chr1	45500058	45500594	537	11	53.58	10.76
chr1	45764519	45765092	574	12	58.12	9.56
chr1	45775495	45776210	716	16	76.76	9.56
chr1	45777167	45777749	583	11	50.06	7.17
chr1	45780812	45781547	736	15	67.59	10.76
chr1	45783272	45784009	738	14	60.23	10.76
chr1	46368432	46369769	1338	44	247.98	19.13
chr1	46404745	46406035	1291	29	127.16	11.96
chr1	46406295	46407124	830	17	74.99	9.56
chr1	46441892	46442492	601	12	55.98	9.56
chr1	46632862	46633927	1066	27	131.72	13.15
chr1	46646877	46647455	579	11	50.35	9.56
chr1	46674462	46675326	865	21	102.63	11.96
chr1	46683910	46684751	842	19	89.02	10.76
chr1	46685136	46686657	1522	60	373.9	17.93
chr1	46686675	46687793	1119	37	203.16	19.13
chr1	46692969	46693722	754	15	66.22	9.56
chr1	46696995	46697768	774	17	79.49	9.56
chr1	46703760	46704772	1013	31	171.36	19.13
chr1	46704807	46706710	1904	73	442.5	17.93
chr1	46708501	46709140	640	13	60.33	9.56
chr1	46722924	46723749	826	18	82.75	15.54
chr1	46724097	46725283	1187	37	203.73	14.35
chr1	46726481	46733191	6711	304	1973.44	35.87
chr1	46767116	46768100	985	22	99.79	9.56
chr1	46769193	46769693	501	11	56.6	10.76
chr1	46771689	46773224	1536	48	259.33	13.15
chr1	46775034	46775659	626	12	54.09	8.37
chr1	46775819	46776934	1116	23	96.73	9.56
chr1	46779979	46781469	1491	35	155.83	11.96
chr1	46782254	46783452	1199	29	135.19	14.35
chr1	46996021	46996620	600	12	56.05	8.37
chr1	47005950	47006600	651	12	52.3	10.76
chr1	47261382	47261945	564	13	66.74	10.76
chr1	47262043	47263508	1466	37	173.81	13.15
chr1	47287538	47288259	722	16	76.25	8.37
chr1	47637582	47638192	611	13	62.66	9.56
chr1	47652096	47652587	492	11	57.4	9.56
chr1	47652695	47653781	1087	36	207.26	19.13
chr1	47654013	47657246	3234	91	438.36	21.52
chr1	47657341	47658037	697	14	56.09	10.76
chr1	47658493	47659057	565	11	51.4	10.76
chr1	47670699	47675034	4336	166	978.36	22.72
chr1	47677199	47682224	5026	198	1184.75	19.13
chr1	47682291	47688062	5772	265	1737.46	25.11
chr1	47688135	47689700	1566	51	273.51	17.93
chr1	47697180	47698674	1495	40	195.32	14.35
chr1	47699312	47700234	923	21	97.43	13.15
chr1	47700778	47701319	542	11	53.18	8.37
chr1	47720885	47721452	568	11	51.17	7.17
chr1	47732340	47734180	1841	46	210.18	13.15
chr1	47744291	47749421	5131	173	933.72	22.72
chr1	47752255	47753136	882	20	93.27	13.15
chr1	47763561	47764172	612	13	62.58	9.56
chr1	47769556	47771575	2020	54	257.31	14.35
chr1	47771913	47773361	1449	50	288.63	17.93
chr1	47773531	47774107	577	11	50.5	7.17
chr1	47808275	47809189	915	25	130.48	13.15
chr1	47829854	47830768	915	19	83.05	9.56
chr1	47830799	47831784	986	34	202.18	17.93
chr1	47831920	47833108	1189	35	185.91	14.35
chr1	47837830	47838409	580	11	50.28	8.37
chr1	47872191	47872751	561	11	51.7	9.56
chr1	47895951	47896461	511	11	55.74	8.37
chr1	47945182	47945750	569	13	66.29	9.56
chr1	47946149	47947848	1700	55	301.78	14.35
chr1	47948458	47949249	792	18	85.63	9.56
chr1	47949698	47950229	532	11	53.99	9.56
chr1	47950974	47953438	2465	60	262.98	13.15
chr1	47954218	47954756	539	11	53.42	8.37
chr1	47955978	47956475	498	11	56.87	9.56
chr1	47962609	47963364	756	21	113.62	14.35
chr1	47963520	47965129	1610	49	259.35	14.35
chr1	48080426	48081090	665	14	65.79	9.56
chr1	48121740	48122287	548	11	52.71	8.37
chr1	48145767	48146337	571	12	58.37	10.76
chr1	48157814	48158382	569	11	51.09	8.37
chr1	48158741	48159339	599	13	63.67	8.37
chr1	48161547	48163306	1760	40	170.95	10.76
chr1	48174176	48174828	653	13	59.32	9.56
chr1	48214769	48215295	527	11	54.4	7.17
chr1	48216317	48217078	762	17	80.51	8.37
chr1	48220801	48221317	517	11	55.23	7.17
chr1	48222499	48224191	1693	51	267.17	14.35
chr1	48225189	48225737	549	11	52.63	8.37
chr1	48229016	48229847	832	16	67.64	10.76
chr1	48232835	48234793	1959	64	350.44	16.74
chr1	48236416	48237719	1304	32	149.21	11.96
chr1	48246900	48247480	581	11	50.2	8.37
chr1	48251775	48252418	644	14	67.53	10.76
chr1	48252429	48253075	647	16	83.07	11.96
chr1	48287153	48287776	624	12	54.24	8.37
chr1	48708036	48708802	767	15	65.25	10.76
chr1	48709084	48710255	1172	25	107	10.76
chr1	49013555	49014648	1094	30	153.63	15.54
chr1	49041772	49042363	592	12	56.68	9.56
chr1	49111143	49111633	491	11	57.49	9.56
chr1	50285311	50286382	1072	37	218.52	17.93
chr1	50286491	50287946	1456	39	191.04	11.96
chr1	50347354	50349506	2153	80	473.13	19.13
chr1	50493267	50493898	632	12	53.65	10.76
chr1	50502664	50503218	555	11	52.16	10.76
chr1	50572567	50573201	635	13	60.72	10.76
chr1	50576939	50577561	623	12	54.31	9.56
chr1	50605342	50606310	969	24	116.85	13.15
chr1	50629464	50630030	567	11	51.24	8.37
chr1	50646593	50647508	916	23	113.86	10.76
chr1	50650100	50659491	9392	357	2067.89	22.72
chr1	50659593	50671426	11834	518	3100	26.3
chr1	51214644	51215165	522	11	54.81	8.37
chr1	51216631	51217346	716	15	61.84	9.56
chr1	51218196	51223270	5075	168	895.55	16.74
chr1	51224192	51224764	573	12	58.2	8.37
chr1	51255934	51256514	581	11	50.2	9.56
chr1	51289283	51289894	612	12	55.14	8.37
chr1	51314638	51316100	1463	41	207	15.54
chr1	51322976	51323616	641	15	75.59	9.56
chr1	51324575	51325717	1143	23	94.71	8.37
chr1	51328929	51329516	588	13	64.61	8.37
chr1	51348000	51349054	1055	27	132.79	9.56
chr1	51581437	51583160	1724	44	205.28	13.15
chr1	51583380	51583944	565	11	51.4	8.37
chr1	51584193	51584716	524	11	54.64	8.37
chr1	52141554	52142108	555	14	75.72	10.76
chr1	52148786	52149696	911	21	98.47	10.76
chr1	52155129	52155797	669	14	65.47	8.37
chr1	52186894	52187449	556	11	52.08	7.17
chr1	52228739	52229727	989	25	122.99	15.54
chr1	52229963	52231771	1809	48	229.36	14.35
chr1	52839577	52840176	600	12	56.05	8.37
chr1	52870227	52871400	1174	36	196.42	11.96
chr1	52871695	52873203	1509	58	356.3	16.74
chr1	52875960	52876568	609	13	62.83	9.56
chr1	53079828	53080916	1089	31	162.64	11.96
chr1	53081120	53083253	2134	77	447.32	21.52
chr1	53163295	53164434	1140	24	102.16	9.56
chr1	53165524	53166846	1323	33	155.38	9.56
chr1	53190109	53190951	843	20	96.73	9.56
chr1	53192831	53193678	848	27	155.74	16.74
chr1	53194556	53195176	621	14	69.51	9.56
chr1	53210866	53211402	537	11	53.58	7.17
chr1	53227896	53228379	484	11	58.12	9.56
chr1	53296493	53297058	566	11	51.32	9.56
chr1	53297487	53300256	2770	99	565.61	22.72
chr1	53300703	53302945	2243	73	395.91	21.52
chr1	53342274	53343085	812	20	99.61	10.76
chr1	53349981	53351190	1210	31	150.12	11.96
chr1	53362771	53363305	535	11	53.74	9.56
chr1	53416983	53417513	531	11	54.07	8.37
chr1	53595867	53596841	975	27	140.98	16.74
chr1	53643668	53644393	726	14	61.1	10.76
chr1	53660262	53660953	692	14	63.65	8.37
chr1	53674769	53675431	663	15	73.62	10.76
chr1	53727969	53728650	682	14	64.43	9.56
chr1	53737688	53738228	541	11	53.26	9.56
chr1	53848686	53849197	512	11	55.65	9.56
chr1	53861665	53862270	606	12	55.59	9.56
chr1	53863292	53863837	546	12	60.48	10.76
chr1	53895863	53896490	628	12	53.94	9.56
chr1	53896510	53897064	555	11	52.16	7.17
chr1	53920551	53922148	1598	39	177.38	11.96
chr1	53924354	53925516	1163	27	122.82	14.35
chr1	53930975	53931563	589	13	64.52	10.76
chr1	53969309	53970422	1114	26	119.38	11.96
chr1	53972830	53973645	816	16	68.81	10.76
chr1	53973748	53977432	3685	142	843.69	20.32
chr1	53977920	53979229	1310	40	215.58	13.15
chr1	53980896	53981785	890	22	108.28	10.76
chr1	54712056	54713014	959	24	117.8	10.76
chr1	55037827	55039854	2028	49	216.65	14.35
chr1	55161950	55162461	512	11	55.65	9.56
chr1	55163205	55164863	1659	48	245.12	11.96
chr1	55166423	55168848	2426	68	331.38	13.15
chr1	55176460	55177075	616	14	69.95	9.56
chr1	55179205	55179808	604	12	55.75	8.37
chr1	55216218	55218985	2768	103	603.79	16.74
chr1	55220176	55221076	901	19	84.15	9.56
chr1	55235248	55236738	1491	44	229.53	14.35
chr1	55252240	55252911	672	14	65.23	9.56
chr1	55542472	55543029	558	11	51.93	9.56
chr1	55545098	55545698	601	12	55.98	9.56
chr1	55546512	55547105	594	13	64.09	10.76
chr1	55608640	55609188	549	11	52.63	8.37
chr1	56230687	56231573	887	19	85.27	11.96
chr1	56713971	56714545	575	11	50.65	7.17
chr1	56714813	56716027	1215	34	174.46	13.15
chr1	56716038	56717121	1084	26	122.06	13.15
chr1	56781676	56782237	562	11	51.62	8.37
chr1	56815541	56816890	1350	29	115.08	14.35
chr1	56880853	56883402	2550	105	656.84	20.32
chr1	56883579	56886153	2575	98	584.12	19.13
chr1	57657931	57658568	638	12	53.22	7.17
chr1	57659339	57660319	981	25	123.77	14.35
chr1	57660876	57661447	572	13	66.02	8.37
chr1	57661533	57662201	669	14	65.47	9.56
chr1	57662621	57664812	2192	64	322.87	13.15
chr1	58486118	58487817	1700	56	310.84	15.54
chr1	58488584	58490424	1841	49	234.33	15.54
chr1	58655862	58656554	693	14	63.58	8.37
chr1	58811750	58812669	920	21	97.69	11.96
chr1	58812909	58815013	2105	71	395.4	19.13
chr1	58815339	58816833	1495	55	329.39	23.91
chr1	59018184	59020641	2458	71	353.23	11.96
chr1	59020985	59021769	785	16	71.14	10.76
chr1	59022890	59025608	2719	83	427.09	14.35
chr1	59161200	59161763	564	11	51.47	8.37
chr1	59164479	59165084	606	12	55.59	8.37
chr1	59167109	59167791	683	14	64.35	9.56
chr1	59210069	59211221	1153	24	101.16	9.56
chr1	59215728	59216669	942	19	80.99	9.56
chr1	59276468	59277022	555	12	59.71	9.56
chr1	59286010	59286700	691	13	56.52	8.37
chr1	59287064	59287814	751	20	105.68	13.15
chr1	59290651	59292226	1576	45	228.66	16.74
chr1	59292821	59293547	727	17	83.59	10.76
chr1	59293886	59294532	647	12	52.58	9.56
chr1	59295503	59296249	747	19	97.79	9.56
chr1	59296710	59298319	1610	39	176.29	10.76
chr1	59301705	59303442	1738	38	157.83	9.56
chr1	59317976	59318552	577	13	65.57	9.56
chr1	59385409	59385988	580	11	50.28	8.37
chr1	60163708	60164288	581	11	50.2	7.17
chr1	60937935	60938481	547	13	68.32	10.76
chr1	61067501	61068738	1238	31	147.43	13.15
chr1	61068817	61069477	661	14	66.12	9.56
chr1	61126126	61126655	530	12	61.89	13.15
chr1	61740307	61741002	696	14	63.35	8.37
chr1	61981358	61982080	723	17	83.95	9.56
chr1	62242036	62242584	549	11	52.63	9.56
chr1	62432427	62434859	2433	62	281.66	11.96
chr1	62518866	62519413	548	11	52.71	10.76
chr1	62524247	62526173	1927	54	266.91	14.35
chr1	62548610	62549658	1049	32	175.93	15.54
chr1	62553339	62553831	493	13	73.73	10.76
chr1	62554635	62555204	570	11	51.02	9.56
chr1	62555236	62558395	3160	127	777.8	20.32
chr1	63309974	63314123	4150	145	805.94	20.32
chr1	63542714	63543347	634	16	84.35	9.56
chr1	63545215	63546280	1066	24	108.17	8.37
chr1	63551180	63552128	949	22	102.89	11.96
chr1	63553215	63553797	583	11	50.06	8.37
chr1	63555774	63559274	3501	173	1193.16	28.69
chr1	63559377	63561376	2000	70	400.16	16.74
chr1	63562361	63572117	9757	478	3100	34.67
chr1	63572795	63573350	556	11	52.08	8.37
chr1	63573481	63574301	821	16	68.44	10.76
chr1	63591117	63591803	687	21	121.57	11.96
chr1	64010860	64012207	1348	44	246.71	20.32
chr1	64013005	64014889	1885	77	484.89	22.72
chr1	64151644	64152566	923	22	105.22	13.15
chr1	64153080	64154211	1132	28	133.46	10.76
chr1	64500260	64500827	568	11	51.17	7.17
chr1	64563901	64564518	618	13	62.08	10.76
chr1	64565432	64566348	917	21	97.95	11.96
chr1	64567401	64568405	1005	24	113.51	14.35
chr1	64573520	64574189	670	15	73.01	10.76
chr1	64682838	64683661	824	16	61.23	10.76
chr1	64706073	64708359	2287	87	520.74	21.52
chr1	64708791	64710920	2130	72	392.15	16.74
chr1	64710926	64711481	556	11	52.08	9.56
chr1	64755700	64756230	531	11	54.07	11.96
chr1	65241514	65242333	820	17	75.76	13.15
chr1	65388124	65389200	1077	24	107.25	8.37
chr1	65937657	65938258	602	13	63.41	8.37
chr1	65941776	65942609	834	18	82.09	9.56
chr1	65942938	65944555	1618	37	160.21	13.15
chr1	66027864	66028383	520	11	54.98	9.56
chr1	66028433	66034280	5848	229	1361.3	23.91
chr1	66569381	66571438	2058	62	320.77	20.32
chr1	66770593	66771158	566	11	51.32	10.76
chr1	67740957	67741662	706	14	62.58	9.56
chr1	68038875	68039463	589	12	56.92	7.17
chr1	68067355	68068425	1071	25	115.42	10.76
chr1	68068507	68071301	2795	124	808.37	25.11
chr1	68071642	68073628	1987	73	430.28	21.52
chr1	68073830	68074861	1032	23	103.44	9.56
chr1	68075100	68075528	429	12	72.14	11.96
chr1	68077844	68078815	972	21	93.33	10.76
chr1	68079884	68080581	698	15	63.19	9.56
chr1	68081307	68081878	572	11	50.87	8.37
chr1	68185452	68186088	637	13	53.29	8.37
chr1	68287377	68287988	612	14	62.58	9.56
chr1	68288777	68290315	1539	40	190.94	13.15
chr1	68466032	68466656	625	15	77.08	8.37
chr1	68467928	68473142	5215	202	1194.89	22.72
chr1	68474964	68475523	560	11	51.78	9.56
chr1	69807055	69808162	1108	39	232.35	15.54
chr1	72520077	72520676	600	12	56.05	9.56
chr1	72522426	72523629	1204	28	126.95	10.76
chr1	75362150	75375222	13073	600	3100	31.08
chr1	75375294	75377593	2300	98	627.74	19.13
chr1	75377968	75378915	948	24	118.86	11.96
chr1	75850975	75854196	3222	117	671.87	16.74
chr1	75854498	75857067	2570	80	418.32	16.74
chr1	75947763	75948336	574	11	50.72	8.37
chr1	76313307	76313980	674	12	50.72	10.76
chr1	76314336	76314999	664	15	73.53	9.56
chr1	77003229	77003863	635	12	53.44	9.56
chr1	77101235	77101719	485	11	58.03	9.56
chr1	77103113	77108713	5601	211	1224.29	27.5
chr1	77294747	77295234	488	11	57.76	11.96
chr1	77517794	77520241	2448	79	424.26	17.93
chr1	77520539	77522869	2331	84	485.72	15.54
chr1	78283449	78284205	757	14	58.9	10.76
chr1	78284491	78285036	546	11	52.86	9.56
chr1	78728126	78730644	2519	72	355.07	17.93
chr1	79243435	79244064	630	13	61.12	8.37
chr1	82035938	82039052	3115	99	520.82	17.93
chr1	82039059	82040027	969	29	158.91	15.54
chr1	82041272	82043786	2515	73	363.99	13.15
chr1	82043946	82045153	1208	25	104.2	8.37
chr1	83930495	83932802	2308	53	223.02	9.56
chr1	85129550	85130237	688	13	56.73	9.56
chr1	85130370	85132820	2451	91	535.08	17.93
chr1	85132858	85133561	704	18	93.85	11.96
chr1	85233465	85235420	1956	68	387.51	17.93
chr1	85235740	85238318	2579	106	652.15	21.52
chr1	85258812	85259427	616	16	86.17	10.76
chr1	85262966	85263525	560	11	51.78	8.37
chr1	85282015	85283472	1458	40	199.13	11.96
chr1	85283977	85286366	2390	115	788.57	26.3
chr1	85286741	85289171	2431	104	666.51	27.5
chr1	85701724	85702875	1152	31	155.93	10.76
chr1	85703590	85704500	911	22	106.32	10.76
chr1	85752705	85753537	833	18	82.17	11.96
chr1	85754671	85755585	915	21	98.12	11.96
chr1	85758256	85762402	4147	138	742.18	19.13
chr1	85762958	85763825	868	15	58.36	11.96
chr1	85763974	85764614	641	13	60.25	8.37
chr1	85765193	85766700	1508	40	194.01	15.54
chr1	85767586	85768363	778	14	57.47	11.96
chr1	85769530	85770971	1442	39	192.47	13.15
chr1	85771628	85772447	820	16	68.51	11.96
chr1	85772613	85773713	1101	22	90.67	10.76
chr1	85815321	85817766	2446	100	623.76	21.52
chr1	86087596	86088169	574	11	50.72	10.76
chr1	86394178	86395223	1046	26	125.58	9.56
chr1	86395462	86396098	637	14	68.12	8.37
chr1	86742907	86743471	565	13	66.65	10.76
chr1	86987712	86988398	687	13	56.8	10.76
chr1	86991434	86992166	733	17	83.05	9.56
chr1	86993923	86995128	1206	33	167	11.96
chr1	86998485	86999288	804	18	84.6	10.76
chr1	86999334	87000759	1426	45	245.98	19.13
chr1	87001005	87001537	533	14	77.98	8.37
chr1	87002095	87003160	1066	29	148.18	19.13
chr1	87004759	87009511	4753	172	975.3	31.08
chr1	87009825	87012648	2824	96	530.47	16.74
chr1	87060530	87061178	649	12	52.44	8.37
chr1	87064341	87065144	804	15	55.76	14.35
chr1	87370785	87371633	849	20	96.18	10.76
chr1	87389114	87390241	1128	33	175.5	19.13
chr1	87390336	87392144	1809	49	237.57	15.54
chr1	87394798	87395396	599	12	56.13	8.37
chr1	87398789	87400006	1218	26	110.73	11.96
chr1	87400045	87400872	828	20	98.1	10.76
chr1	87401160	87402802	1643	37	158.12	13.15
chr1	87403546	87404319	774	16	71.99	11.96
chr1	87404664	87405575	912	19	83.29	13.15
chr1	87408279	87409057	779	17	79.08	9.56
chr1	87409551	87410822	1272	32	152.21	14.35
chr1	87412190	87413795	1606	42	200.59	10.76
chr1	87413966	87417608	3643	151	938.95	23.91
chr1	87417661	87418115	455	11	60.86	11.96
chr1	87419358	87422158	2801	93	506.08	14.35
chr1	87422807	87423763	957	20	87.12	11.96
chr1	87424725	87425754	1030	23	103.6	11.96
chr1	87427747	87429436	1690	48	241.73	11.96
chr1	87437958	87438964	1007	24	113.33	8.37
chr1	87440299	87441273	975	30	167.05	16.74
chr1	87441276	87444547	3272	109	591.04	19.13
chr1	87444829	87446205	1377	45	252.1	19.13
chr1	87446443	87447350	908	20	91.07	9.56
chr1	87447639	87448242	604	12	55.75	7.17
chr1	87449518	87450205	688	16	79.23	9.56
chr1	87469974	87470773	800	21	108.97	13.15
chr1	87471615	87472549	935	20	88.86	9.56
chr1	87473061	87473788	728	15	68.22	10.76
chr1	87477321	87478090	770	15	65.03	9.56
chr1	87481646	87482385	740	14	60.09	9.56
chr1	87493348	87494271	924	19	82.36	10.76
chr1	87495198	87495868	671	15	72.92	10.76
chr1	87508959	87509564	606	12	55.59	7.17
chr1	87672008	87673154	1147	29	140.06	15.54
chr1	88700189	88700784	596	12	56.37	9.56
chr1	88701068	88701668	601	12	55.98	8.37
chr1	89700511	89701043	533	11	53.9	7.17
chr1	90356631	90357204	574	11	50.72	9.56
chr1	90938334	90939379	1046	26	125.58	13.15
chr1	90941712	90950118	8407	383	2488.55	32.28
chr1	90950142	90955654	5513	231	1434.21	21.52
chr1	90955984	90973450	17467	828	3100	27.5
chr1	90973714	90974268	555	11	52.16	8.37
chr1	90977251	90977855	605	13	63.16	10.76
chr1	90984395	90984962	568	11	51.17	7.17
chr1	90990653	90991260	608	13	62.91	11.96
chr1	91011250	91011844	595	13	64.01	10.76
chr1	91035059	91035675	617	12	54.76	8.37
chr1	91061534	91062318	785	16	71.14	10.76
chr1	91065544	91076482	10939	501	3100	26.3
chr1	91076611	91081762	5152	228	1465	26.3
chr1	91082496	91083737	1242	29	131.35	11.96
chr1	91087771	91088843	1073	26	123.07	15.54
chr1	91089917	91090475	559	12	51.85	10.76
chr1	91091287	91091938	652	12	52.23	10.76
chr1	91338264	91338882	619	12	54.61	8.37
chr1	91625002	91625912	911	261	3100	186.51
chr1	91689408	91690472	1065	22	93.37	7.17
chr1	91691157	91691736	580	11	50.28	7.17
chr1	91692649	91696345	3697	109	540.34	13.15
chr1	91775158	91775772	615	13	62.33	11.96
chr1	91962365	91962870	506	11	56.17	9.56
chr1	92122266	92123878	1613	76	522.17	29.89
chr1	92124253	92125447	1195	39	220.75	15.54
chr1	92125624	92126212	589	18	106.59	14.35
chr1	92256776	92257326	551	12	60.05	9.56
chr1	92257419	92258119	701	14	62.96	10.76
chr1	92266723	92270229	3507	134	792.95	31.08
chr1	92270256	92270997	742	15	59.95	11.96
chr1	92713005	92713819	815	19	91.39	10.76
chr1	92715257	92717017	1761	52	268.07	11.96
chr1	92719382	92723694	4313	153	858.19	19.13
chr1	92723942	92727794	3853	122	635.37	26.3
chr1	92781149	92781742	594	13	64.09	8.37
chr1	92783899	92784672	774	17	79.49	11.96
chr1	93202245	93202782	538	11	53.5	9.56
chr1	93687400	93689103	1704	49	248.7	14.35
chr1	93919860	93920732	873	32	199.16	16.74
chr1	93930149	93930903	755	15	66.14	9.56
chr1	93930926	93931925	1000	28	146.77	14.35
chr1	93949626	93950225	600	12	56.05	9.56
chr1	93975092	93975650	559	11	51.85	7.17
chr1	93986050	93986535	486	11	57.94	8.37
chr1	94037117	94037731	615	12	54.91	8.37
chr1	94056068	94056598	531	11	54.07	8.37
chr1	94065208	94065711	504	11	56.34	10.76
chr1	94286118	94286892	775	20	103.23	10.76
chr1	94342791	94343424	634	14	68.38	8.37
chr1	94343851	94344861	1011	25	120.89	9.56
chr1	94344877	94345741	865	23	118.94	15.54
chr1	94469774	94470419	646	12	52.65	9.56
chr1	94471640	94476149	4510	150	804.58	20.32
chr1	94476248	94478727	2480	75	385.13	17.93
chr1	94479953	94482325	2373	78	424.65	19.13
chr1	94482365	94485841	3477	157	1028.5	27.5
chr1	94492015	94493682	1668	48	244.13	14.35
chr1	94549012	94549593	582	11	50.13	8.37
chr1	94777598	94778495	898	18	77.08	10.76
chr1	94778734	94779676	943	28	153.17	13.15
chr1	94780207	94781722	1516	40	193.21	14.35
chr1	94781914	94782516	603	13	63.33	9.56
chr1	95058743	95059953	1211	41	237.02	16.74
chr1	95060459	95061333	875	17	71.63	11.96
chr1	95061408	95062439	1032	23	103.44	9.56
chr1	95153672	95154238	567	11	51.24	7.17
chr1	95162918	95164386	1469	44	232.05	14.35
chr1	95546123	95546692	570	11	51.02	10.76
chr1	95549827	95550420	594	13	64.09	8.37
chr1	95644932	95645484	553	11	52.32	8.37
chr1	96011181	96011797	617	12	54.76	8.37
chr1	97074707	97075246	540	11	53.34	9.56
chr1	98280373	98283922	3550	129	738.95	20.32
chr1	98284064	98286612	2549	124	853.95	23.91
chr1	98286664	98288505	1842	68	403.47	20.32
chr1	98289676	98291795	2120	71	393.45	17.93
chr1	98897960	98899873	1914	58	302.59	14.35
chr1	98900251	98902549	2299	81	461.98	20.32
chr1	99240485	99242455	1971	55	270.63	17.93
chr1	99243145	99245115	1971	66	367.08	17.93
chr1	99501553	99504013	2461	72	361.42	15.54
chr1	100775438	100777565	2128	67	356.43	16.74
chr1	100778118	100779708	1591	49	261.59	22.72
chr1	101474990	101477004	2015	61	317.04	16.74
chr1	101549071	101549960	890	18	77.68	13.15
chr1	103130668	103131177	510	11	55.82	8.37
chr1	103344736	103345412	677	14	64.83	11.96
chr1	107482422	107484232	1811	60	333	16.74
chr1	107484292	107485355	1064	30	156.84	10.76
chr1	107485429	107486901	1473	34	149.73	11.96
chr1	107811239	107811759	521	11	54.89	9.56
chr1	107823407	107824380	974	27	141.09	15.54
chr1	107824852	107825833	982	25	123.67	10.76
chr1	107914433	107915261	829	29	176.8	16.74
chr1	108353691	108354827	1137	29	141.02	10.76
chr1	108354901	108355867	967	28	150.42	15.54
chr1	108355916	108359875	3960	125	649.01	16.74
chr1	108361090	108363593	2504	83	453.29	23.91
chr1	108363784	108364495	712	15	69.49	10.76
chr1	108371482	108372242	761	20	104.65	11.96
chr1	108372438	108373071	634	13	60.8	10.76
chr1	108373093	108373661	569	14	74.33	13.15
chr1	108390273	108390869	597	15	79.79	11.96
chr1	108395574	108396105	532	12	61.71	10.76
chr1	108540874	108541817	944	20	88.14	9.56
chr1	108542072	108543087	1016	29	153.57	13.15
chr1	108543137	108544114	978	41	271.88	20.32
chr1	108545105	108545844	740	18	90.35	11.96
chr1	108546287	108547775	1489	42	212.65	13.15
chr1	109457215	109458830	1616	40	183.6	14.35
chr1	109458837	109459582	746	16	74.24	10.76
chr1	109638404	109639025	622	16	85.55	10.76
chr1	109740073	109741805	1733	67	410.01	28.69
chr1	109785763	109786382	620	12	54.54	11.96
chr1	109786384	109786965	582	11	50.13	9.56
chr1	109787565	109788445	881	15	57.54	11.96
chr1	109788519	109789810	1292	37	191.6	11.96
chr1	109807827	109809468	1642	55	309.19	21.52
chr1	109809496	109810844	1349	38	193.89	14.35
chr1	109811058	109814089	3032	137	900.74	34.67
chr1	109814196	109815434	1239	34	171.91	13.15
chr1	110409467	110410049	583	11	50.06	8.37
chr1	110410406	110417433	7028	280	1678.18	26.3
chr1	110417597	110418136	540	11	53.34	7.17
chr1	110418213	110418878	666	14	65.71	10.76
chr1	110426144	110431064	4921	185	1074.7	20.32
chr1	110432084	110432663	580	11	50.28	8.37
chr1	110438284	110438736	453	12	69.47	10.76
chr1	110455917	110456476	560	13	67.1	10.76
chr1	110467425	110468385	961	22	101.84	9.56
chr1	110473847	110474412	566	11	51.32	8.37
chr1	110474718	110475939	1222	32	157.08	11.96
chr1	110476581	110477255	675	12	50.65	9.56
chr1	110480262	110483300	3039	73	312.53	11.96
chr1	110483644	110484322	679	15	72.23	13.15
chr1	110485868	110486545	678	16	80.14	11.96
chr1	110488224	110490079	1856	51	249.3	13.15
chr1	110492071	110494763	2693	92	510.97	19.13
chr1	110495002	110497609	2608	78	396.46	16.74
chr1	110498015	110498939	925	22	105.03	13.15
chr1	110499158	110500052	895	19	84.63	10.76
chr1	110522826	110523327	502	11	56.51	10.76
chr1	110553057	110553835	779	24	137.24	14.35
chr1	110554931	110556005	1075	39	237.02	14.35
chr1	110556077	110557382	1306	57	379.35	20.32
chr1	110557384	110558652	1269	45	266.5	16.74
chr1	110566057	110567044	988	23	107.22	15.54
chr1	110597232	110597930	699	13	55.95	9.56
chr1	110598181	110598973	793	16	70.53	10.76
chr1	110599310	110600083	774	18	87.22	10.76
chr1	110603871	110604444	574	11	50.72	7.17
chr1	110610232	110610959	728	15	68.22	9.56
chr1	110611097	110612190	1094	23	98.43	8.37
chr1	110616962	110618070	1109	28	135.65	13.15
chr1	110635902	110636527	626	12	54.09	9.56
chr1	110641904	110642476	573	11	50.79	9.56
chr1	110646223	110646924	702	15	70.31	10.76
chr1	110668019	110668576	558	11	51.93	9.56
chr1	110759988	110761110	1123	30	150.61	13.15
chr1	110762184	110762703	520	11	54.98	10.76
chr1	110762843	110763756	914	22	106.04	13.15
chr1	110765978	110766543	566	12	58.78	9.56
chr1	110769094	110769658	565	11	51.4	8.37
chr1	110774209	110775091	883	17	71.05	13.15
chr1	110775201	110775879	679	13	57.38	8.37
chr1	110777061	110778084	1024	27	135.88	13.15
chr1	110779268	110780884	1617	40	183.51	11.96
chr1	110780952	110782259	1308	32	148.84	10.76
chr1	110782555	110783822	1268	30	136.8	11.96
chr1	110785830	110787059	1230	35	181.33	16.74
chr1	110791201	110792883	1683	36	147.5	11.96
chr1	110794501	110795105	605	12	55.67	8.37
chr1	110795334	110796337	1004	23	105.82	9.56
chr1	110796993	110797539	547	11	52.78	9.56
chr1	110798110	110799197	1088	26	121.7	9.56
chr1	110799391	110800182	792	16	70.6	9.56
chr1	110816970	110817609	640	16	83.75	10.76
chr1	110817873	110820126	2254	72	385.58	17.93
chr1	110820513	110821113	601	12	55.98	7.17
chr1	110822073	110823294	1222	38	208.4	14.35
chr1	110823724	110827197	3474	113	592.67	19.13
chr1	110828489	110829615	1127	23	88.79	8.37
chr1	110845911	110846752	842	18	81.44	13.15
chr1	110865859	110866485	627	13	61.36	8.37
chr1	110874005	110874500	496	11	57.04	10.76
chr1	110875042	110875610	569	11	51.09	9.56
chr1	110898213	110899477	1265	32	152.88	11.96
chr1	110899854	110900969	1116	36	203.54	16.74
chr1	110917249	110918259	1011	22	97.64	8.37
chr1	110918404	110919024	621	13	61.84	10.76
chr1	110938731	110939905	1175	31	153.59	14.35
chr1	110940531	110941517	987	28	148.2	19.13
chr1	110943238	110943819	582	11	50.13	7.17
chr1	110946392	110947412	1021	22	96.83	9.56
chr1	110947986	110951450	3465	118	648.13	17.93
chr1	110951687	110954913	3227	124	738.12	16.74
chr1	110964418	110965654	1237	30	131.79	11.96
chr1	110966306	110966931	626	13	61.44	9.56
chr1	110973271	110973871	601	13	63.5	10.76
chr1	110991780	110992308	529	11	54.23	10.76
chr1	110992970	110993601	632	13	60.96	7.17
chr1	110994164	110994732	569	12	58.53	9.56
chr1	111014709	111018463	3755	136	776.15	17.93
chr1	111018802	111019424	623	12	54.31	7.17
chr1	111019447	111022125	2679	92	512.83	16.74
chr1	111103742	111104411	670	15	73.01	10.76
chr1	111123958	111124687	730	17	83.32	10.76
chr1	111311947	111312803	857	18	80.24	11.96
chr1	111319542	111320042	501	11	56.6	8.37
chr1	111330280	111330830	551	12	60.05	8.37
chr1	111385172	111385846	675	15	72.57	10.76
chr1	111598788	111599318	531	11	54.07	10.76
chr1	111606973	111607512	540	11	53.34	8.37
chr1	111608997	111609737	741	21	115.27	20.32
chr1	111612424	111613236	813	22	115.99	16.74
chr1	111613247	111616703	3457	138	839.61	17.93
chr1	111659417	111660048	632	15	76.42	8.37
chr1	111733621	111734170	550	11	52.55	8.37
chr1	111734591	111735222	632	13	60.96	10.76
chr1	112160512	112161062	551	11	52.47	9.56
chr1	112164923	112165558	636	12	53.36	8.37
chr1	112167341	112167923	583	13	65.04	9.56
chr1	112175559	112176141	583	12	57.39	8.37
chr1	112197314	112197892	579	11	50.35	7.17
chr1	112199834	112200427	594	12	56.52	9.56
chr1	112203423	112204009	587	12	57.07	9.56
chr1	112204106	112204637	532	12	61.71	8.37
chr1	112216422	112216974	553	11	52.32	7.17
chr1	112223357	112223939	583	11	50.06	8.37
chr1	112224850	112225592	743	16	74.49	8.37
chr1	112295623	112296583	961	26	134.04	9.56
chr1	112306559	112307087	529	11	54.23	8.37
chr1	112313167	112313871	705	15	70.06	9.56
chr1	112319405	112320431	1027	23	103.86	9.56
chr1	112320485	112321479	995	23	106.6	9.56
chr1	112321843	112322355	513	11	55.57	11.96
chr1	112322573	112323374	802	17	77.19	10.76
chr1	112330212	112333637	3426	124	709.22	23.91
chr1	112334253	112336631	2379	78	423.89	19.13
chr1	112341370	112341927	558	11	51.93	8.37
chr1	112346016	112346578	563	11	51.55	7.17
chr1	112355482	112356081	600	12	56.05	7.17
chr1	112408794	112409518	725	14	61.17	11.96
chr1	112438163	112438743	581	11	50.2	8.37
chr1	112609630	112610186	557	11	52.01	9.56
chr1	112626736	112627316	581	11	50.2	7.17
chr1	112655067	112655651	585	15	80.99	10.76
chr1	112679802	112680511	710	13	55.19	9.56
chr1	112712720	112713637	918	18	75.6	13.15
chr1	112845223	112846363	1141	26	117.04	11.96
chr1	112846379	112848559	2181	66	341.37	15.54
chr1	112851802	112856163	4362	120	561.7	17.93
chr1	113087641	113089431	1791	58	317.42	16.74
chr1	113089550	113090156	607	16	87.1	11.96
chr1	113091129	113091758	630	13	61.12	8.37
chr1	113193264	113193892	629	14	61.2	9.56
chr1	113600233	113600880	648	16	82.97	14.35
chr1	113731328	113731873	546	12	60.48	9.56
chr1	113735558	113739139	3582	99	468.54	15.54
chr1	113741027	113741588	562	13	59.12	9.56
chr1	113742652	113743299	648	13	59.7	8.37
chr1	113795788	113796332	545	11	52.94	9.56
chr1	114388283	114389319	1037	25	118.47	13.15
chr1	114478955	114479576	622	12	54.39	8.37
chr1	114491258	114491892	635	14	68.29	8.37
chr1	114493890	114496558	2669	76	372.66	11.96
chr1	114496764	114500211	3448	128	744.02	20.32
chr1	114502265	114502849	585	12	57.23	8.37
chr1	114521329	114521917	589	12	56.92	9.56
chr1	114540955	114541621	667	14	65.63	10.76
chr1	114542195	114542762	568	11	51.17	9.56
chr1	114545453	114546118	666	13	58.34	9.56
chr1	114551663	114554100	2438	76	398.8	19.13
chr1	114554212	114554799	588	13	64.61	9.56
chr1	114557411	114557972	562	13	59.12	9.56
chr1	114598589	114599226	638	15	75.87	11.96
chr1	114599584	114600184	601	12	55.98	7.17
chr1	114605341	114606146	806	18	84.43	8.37
chr1	114673370	114674073	704	15	62.74	10.76
chr1	115126138	115126721	584	12	57.31	7.17
chr1	115142445	115143021	577	12	57.88	9.56
chr1	115199027	115201015	1989	64	337.75	21.52
chr1	115218628	115219273	646	12	52.65	10.76
chr1	115680609	115681909	1301	27	111.59	9.56
chr1	115682888	115684058	1171	34	179.29	13.15
chr1	115949787	115950359	573	11	50.79	8.37
chr1	116170003	116170607	605	12	55.67	7.17
chr1	116178856	116179428	573	11	50.79	8.37
chr1	116179768	116182607	2840	96	519.25	20.32
chr1	116182681	116186255	3575	147	910.03	20.32
chr1	116186505	116187201	697	13	56.09	9.56
chr1	116187229	116187811	583	11	50.06	8.37
chr1	116189994	116190883	890	20	92.59	11.96
chr1	116191363	116192131	769	15	65.1	11.96
chr1	116303043	116303525	483	11	58.21	10.76
chr1	116522854	116523413	560	11	51.78	8.37
chr1	117008862	117011610	2749	78	380.92	19.13
chr1	117246308	117247192	885	21	100.79	11.96
chr1	117252918	117254094	1177	33	170.09	10.76
chr1	117254978	117256020	1043	23	102.52	8.37
chr1	117256662	117257253	592	15	80.29	13.15
chr1	117329960	117330641	682	13	57.16	7.17
chr1	117492100	117492746	647	12	52.58	9.56
chr1	117615866	117616593	728	15	68.22	9.56
chr1	117666442	117667078	637	13	53.29	9.56
chr1	117729818	117730394	577	11	50.5	9.56
chr1	117985556	117987259	1704	50	257.26	13.15
chr1	117987294	117988364	1071	29	147.66	14.35
chr1	119314396	119315475	1080	25	114.63	9.56
chr1	119318538	119319984	1447	35	159.74	10.76
chr1	119320162	119320718	557	11	52.01	9.56
chr1	119320835	119332043	11209	567	3100	33.48
chr1	119332333	119343874	11542	518	3100	25.11
chr1	119344099	119347903	3805	155	952.65	22.72
chr1	119347981	119353461	5481	273	1877.72	29.89
chr1	119354193	119354892	700	14	63.04	8.37
chr1	119714701	119715279	579	12	57.72	10.76
chr1	120052860	120053611	752	15	66.37	13.15
chr1	120053623	120054204	582	12	57.47	7.17
chr1	120054560	120055292	733	20	107.58	13.15
chr1	120055476	120057103	1628	50	266.01	16.74
chr1	120057189	120058184	996	24	114.33	13.15
chr1	120079851	120080615	765	21	112.64	13.15
chr1	120084050	120084615	566	12	58.78	8.37
chr1	120093632	120094169	538	12	61.18	9.56
chr1	120151124	120151712	589	12	56.92	9.56
chr1	120838939	120839455	517	16	97.42	16.74
chr1	121053008	121053931	924	25	129.53	13.15
chr1	121055011	121056499	1489	41	204.24	13.15
chr1	121056881	121057814	934	32	190.55	22.72
chr1	121057915	121058713	799	15	62.95	13.15
chr1	121136804	121137405	602	15	79.29	14.35
chr1	121184411	121185439	1029	23	103.69	17.93
chr1	121185483	121187132	1650	772	3100	219.98
chr1	141476790	141477362	573	11	50.79	8.37
chr1	141477856	141480724	2869	69	296.7	11.96
chr1	141480853	141481457	605	13	63.16	10.76
chr1	143239311	143239905	595	12	56.44	8.37
chr1	143244180	143245856	1677	46	226.31	14.35
chr1	143641012	143643115	2104	83	509.61	19.13
chr1	143644082	143644741	660	13	51.67	7.17
chr1	143706275	143706822	548	11	52.71	8.37
chr1	143749404	143752376	2973	125	788.12	29.89
chr1	143753104	143753677	574	11	50.72	10.76
chr1	143758104	143759000	897	23	115.71	10.76
chr1	143769704	143771474	1771	43	193	11.96
chr1	143785482	143788485	3004	147	1011.59	28.69
chr1	143823768	143824132	365	11	75.61	13.15
chr1	144261454	144261980	527	13	70.24	9.56
chr1	144273209	144273791	583	11	50.06	8.37
chr1	144441135	144441973	839	18	81.68	9.56
chr1	145008487	145009061	575	12	58.04	10.76
chr1	145009254	145012727	3474	143	886.48	21.52
chr1	145012740	145013759	1020	28	144.63	11.96
chr1	145013847	145015164	1318	29	124.94	13.15
chr1	145015831	145020734	4904	178	1010.64	25.11
chr1	145027541	145028143	603	12	55.82	8.37
chr1	145517577	145518454	878	22	109.43	10.76
chr1	145519177	145519963	787	17	78.41	9.56
chr1	145520047	145520893	847	26	146.86	19.13
chr1	145535845	145537468	1624	48	249.03	14.35
chr1	146173566	146174135	570	12	58.45	8.37
chr1	146183338	146184068	731	15	67.98	10.76
chr1	146184360	146184877	518	12	62.99	11.96
chr1	146185521	146186160	640	13	60.33	10.76
chr1	146192499	146192996	498	11	56.87	9.56
chr1	146242604	146243245	642	17	91.86	13.15
chr1	146247028	146247701	674	12	50.72	9.56
chr1	146249859	146250433	575	11	50.65	9.56
chr1	146255075	146255752	678	13	57.45	8.37
chr1	146257256	146257841	586	12	57.15	9.56
chr1	146290074	146290650	577	11	50.5	9.56
chr1	146291767	146292415	649	14	67.11	10.76
chr1	146816257	146819335	3079	114	663.8	16.74
chr1	147122951	147123994	1044	28	142.12	14.35
chr1	147132187	147132756	570	12	58.45	10.76
chr1	147301496	147302203	708	20	110.32	19.13
chr1	147403619	147404350	732	17	83.14	11.96
chr1	147404866	147406016	1151	29	139.67	10.76
chr1	147411192	147411774	583	11	50.06	7.17
chr1	147413767	147416635	2869	78	368.41	15.54
chr1	147421934	147423286	1353	47	273.69	15.54
chr1	147423569	147424220	652	21	125.96	19.13
chr1	147437294	147438068	775	15	64.66	10.76
chr1	147459464	147460901	1438	55	328.13	27.5
chr1	147460991	147462160	1170	30	145.91	13.15
chr1	147481486	147482966	1481	30	119.62	13.15
chr1	147489654	147492365	2712	110	680.55	28.69
chr1	147496849	147497867	1019	23	104.53	9.56
chr1	147498240	147498875	636	15	76.05	9.56
chr1	147551980	147554165	2186	68	358.31	21.52
chr1	147598626	147599680	1055	24	109.1	11.96
chr1	147665809	147666269	461	11	60.28	9.56
chr1	147667181	147667767	587	12	57.07	10.76
chr1	148385439	148386437	999	22	98.62	11.96
chr1	148387111	148388903	1793	55	290.49	16.74
chr1	148389419	148391969	2551	101	617.02	22.72
chr1	148399173	148399829	657	14	66.45	11.96
chr1	148399881	148400473	593	12	56.6	10.76
chr1	148496092	148497695	1604	44	217.26	10.76
chr1	148521340	148522001	662	14	66.04	8.37
chr1	149750782	149751342	561	11	51.7	7.17
chr1	149956282	149960545	4264	128	639.71	15.54
chr1	149960564	149962128	1565	60	367.29	17.93
chr1	149962838	149963406	569	11	51.09	8.37
chr1	150066957	150067922	966	25	125.24	16.74
chr1	150076232	150081340	5109	197	1162.4	26.3
chr1	150242844	150243963	1120	24	103.74	9.56
chr1	150291771	150292293	523	11	54.73	10.76
chr1	150297519	150298280	762	17	80.51	9.56
chr1	150314267	150314812	546	11	52.86	10.76
chr1	150342348	150342924	577	11	50.5	8.37
chr1	150344302	150350986	6685	270	1633.5	23.91
chr1	150351302	150355121	3820	197	1389.14	26.3
chr1	150355262	150357068	1807	60	333.52	15.54
chr1	150359876	150360597	722	17	84.04	11.96
chr1	150368805	150369398	594	12	56.52	8.37
chr1	150369827	150371644	1818	44	196.57	13.15
chr1	150371704	150372286	583	11	50.06	8.37
chr1	150372945	150374028	1084	22	91.94	9.56
chr1	150429937	150430581	645	12	52.72	9.56
chr1	150752431	150754696	2266	71	375.23	15.54
chr1	150754731	150756382	1652	52	280.84	19.13
chr1	150759640	150760218	579	11	50.35	7.17
chr1	151235203	151236214	1012	23	105.13	9.56
chr1	151269994	151270894	901	20	91.65	11.96
chr1	151283712	151284474	763	15	65.55	9.56
chr1	151302510	151303143	634	12	53.51	7.17
chr1	151340648	151341330	683	13	57.09	9.56
chr1	151386553	151387151	599	12	56.13	8.37
chr1	151388408	151389082	675	15	72.57	9.56
chr1	151413021	151413594	574	11	50.72	8.37
chr1	151432392	151433002	611	13	62.66	9.56
chr1	151448188	151448968	781	16	71.45	11.96
chr1	151450221	151450799	579	12	57.72	9.56
chr1	151453734	151455041	1308	31	141.01	13.15
chr1	151461024	151461639	616	13	62.25	9.56
chr1	151463818	151464480	663	16	81.54	14.35
chr1	151497388	151500152	2765	146	1049.49	28.69
chr1	151500645	151503252	2608	128	885.32	31.08
chr1	151503586	151504664	1079	23	99.61	9.56
chr1	151505016	151505566	551	11	52.47	7.17
chr1	151508586	151509219	634	12	53.51	10.76
chr1	151519707	151520314	608	12	55.44	9.56
chr1	151525912	151526475	564	11	51.47	7.17
chr1	151550728	151551472	745	14	52.84	11.96
chr1	151565420	151565944	525	11	54.56	9.56
chr1	151566982	151567824	843	21	104.71	13.15
chr1	151575471	151576357	887	26	142.15	14.35
chr1	151576427	151577334	908	30	175.46	15.54
chr1	151577565	151581471	3907	141	801.94	26.3
chr1	151584515	151586131	1617	56	321.75	20.32
chr1	151586805	151588919	2115	54	248.02	11.96
chr1	151588927	151589564	638	14	68.04	8.37
chr1	151595668	151596641	974	22	100.72	10.76
chr1	151596898	151597465	568	11	51.17	7.17
chr1	151603294	151604084	791	19	93.58	10.76
chr1	151605400	151605992	593	12	56.6	7.17
chr1	151615228	151615967	740	15	67.28	10.76
chr1	151620861	151621634	774	14	51.01	10.76
chr1	151624066	151624663	598	12	56.21	8.37
chr1	151625105	151627354	2250	54	235.64	11.96
chr1	151629556	151630135	580	11	50.28	8.37
chr1	151635755	151636468	714	15	69.33	9.56
chr1	151641058	151641685	628	16	84.95	9.56
chr1	151682376	151683175	800	15	62.88	10.76
chr1	151714742	151715316	575	11	50.65	9.56
chr1	151730585	151731331	747	13	52.71	10.76
chr1	151738042	151738547	506	12	64.11	10.76
chr1	151918550	151919888	1339	33	153.89	11.96
chr1	151919920	151920583	664	17	89.6	13.15
chr1	152642368	152643403	1036	28	142.95	11.96
chr1	152643449	152644443	995	49	352.92	31.08
chr1	152644682	152647723	3042	93	476.71	13.15
chr1	152648339	152649084	746	21	114.72	14.35
chr1	152663048	152663696	649	13	59.63	8.37
chr1	152680427	152681161	735	14	60.45	10.76
chr1	152692874	152693614	741	14	60.02	9.56
chr1	152738447	152741157	2711	112	690.67	27.5
chr1	152805460	152806563	1104	28	136.13	11.96
chr1	152807658	152808373	716	14	61.84	9.56
chr1	152979614	152981075	1462	30	121.02	13.15
chr1	152985758	152988009	2252	63	307.92	14.35
chr1	152989196	152989798	603	12	55.82	8.37
chr1	152992941	152993573	633	14	68.47	9.56
chr1	152998275	153000721	2447	66	312.64	16.74
chr1	153000984	153001588	605	14	70.94	8.37
chr1	153007886	153008447	562	12	59.12	9.56
chr1	153020359	153020966	608	12	55.44	7.17
chr1	153030771	153031966	1196	29	135.46	10.76
chr1	153033338	153033960	623	13	61.68	8.37
chr1	153034068	153034782	715	16	76.85	9.56
chr1	153041902	153042883	982	22	100.05	13.15
chr1	153043613	153044821	1209	28	126.52	9.56
chr1	153045592	153046231	640	17	92.07	10.76
chr1	153073541	153074152	612	13	62.58	10.76
chr1	153077885	153078447	563	11	51.55	10.76
chr1	153104188	153104778	591	14	72.23	9.56
chr1	153105530	153106793	1264	32	152.98	10.76
chr1	153106847	153108312	1466	44	232.4	13.15
chr1	153112899	153113910	1012	24	112.88	9.56
chr1	153115434	153116163	730	16	75.57	9.56
chr1	153116367	153116992	626	14	69.07	10.76
chr1	153118379	153121800	3422	124	709.78	19.13
chr1	153122006	153122557	552	15	84.47	13.15
chr1	153123732	153125794	2063	74	428.97	23.91
chr1	153125837	153126551	715	16	76.85	8.37
chr1	153127350	153129457	2108	67	358.86	16.74
chr1	153130539	153131120	582	11	50.13	8.37
chr1	153134792	153135426	635	12	53.44	7.17
chr1	153318133	153319687	1555	46	239.57	15.54
chr1	153320027	153322488	2462	92	543.05	23.91
chr1	153365902	153366811	910	25	131.01	11.96
chr1	153366939	153367564	626	14	69.07	11.96
chr1	154452679	154453454	776	93	993.72	58.58
chr1	154595130	154595687	558	11	51.93	10.76
chr1	154603554	154604098	545	11	52.94	8.37
chr1	154605651	154606511	861	21	103	15.54
chr1	154622903	154624914	2012	56	274.68	13.15
chr1	154625001	154626296	1296	41	226.15	13.15
chr1	154626309	154626806	498	12	64.88	11.96
chr1	154644118	154644667	550	11	52.55	8.37
chr1	154648343	154648804	462	12	68.51	10.76
chr1	154651479	154653312	1834	45	202.94	14.35
chr1	154653870	154654962	1093	22	91.26	10.76
chr1	154655270	154658103	2834	106	622.89	20.32
chr1	154658241	154663280	5040	193	1134.05	27.5
chr1	154663834	154665048	1215	33	166.06	10.76
chr1	154665348	154666738	1391	43	232.43	14.35
chr1	154666763	154667291	529	12	61.98	9.56
chr1	154667910	154672392	4483	259	1937.22	39.45
chr1	154672757	154679038	6282	320	2225.47	28.69
chr1	154679525	154680354	830	22	114.22	13.15
chr1	154859445	154860984	1540	42	207.26	14.35
chr1	154861800	154862780	981	28	148.86	17.93
chr1	154870508	154871482	975	22	100.64	13.15
chr1	154875619	154883238	7620	258	1385.83	21.52
chr1	154883625	154884847	1223	33	165.23	11.96
chr1	154885218	154885947	730	15	68.06	11.96
chr1	154891342	154891865	524	11	54.64	11.96
chr1	154891948	154892543	596	13	63.92	9.56
chr1	154892699	154893633	935	26	136.81	13.15
chr1	154907289	154908955	1667	43	202.73	10.76
chr1	154912064	154913354	1291	38	200.31	14.35
chr1	154913618	154915284	1667	47	235.75	15.54
chr1	154915827	154916664	838	22	113.4	11.96
chr1	154916763	154917287	525	12	62.34	10.76
chr1	154926521	154927879	1359	35	168.01	16.74
chr1	154928398	154929154	757	22	122.15	14.35
chr1	154939855	154942262	2408	77	411.3	19.13
chr1	154942362	154943042	681	14	64.51	13.15
chr1	155070435	155071008	574	12	58.12	10.76
chr1	155080662	155081593	932	28	154.46	17.93
chr1	155082319	155083310	992	27	139.18	13.15
chr1	155084077	155085309	1233	40	225	16.74
chr1	155157217	155160623	3407	156	1030.75	31.08
chr1	155161139	155161679	541	11	53.26	8.37
chr1	155282848	155283337	490	11	57.58	11.96
chr1	155343562	155344417	856	22	111.59	13.15
chr1	155344475	155345293	819	20	98.95	13.15
chr1	155346086	155346663	578	11	50.42	7.17
chr1	155349750	155350373	624	12	54.24	8.37
chr1	155430236	155431945	1710	55	300.54	21.52
chr1	155460180	155460802	623	13	61.68	9.56
chr1	155822891	155823470	580	11	50.28	8.37
chr1	156173600	156174254	655	14	66.61	9.56
chr1	156191529	156192109	581	11	50.2	8.37
chr1	156228584	156229558	975	21	93.09	13.15
chr1	156348594	156350010	1417	42	220.63	14.35
chr1	156400325	156400890	566	12	58.78	9.56
chr1	156415527	156419075	3549	106	531.2	14.35
chr1	156425108	156425702	595	12	56.44	7.17
chr1	156425988	156426719	732	13	53.7	9.56
chr1	156692986	156693589	604	12	55.75	9.56
chr1	156735759	156736355	597	12	56.29	9.56
chr1	157243930	157244536	607	13	62.99	9.56
chr1	157244586	157245113	528	11	54.31	9.56
chr1	157246899	157248344	1446	41	208.83	13.15
chr1	157377420	157378272	853	18	80.55	8.37
chr1	157405168	157407872	2705	97	555.85	22.72
chr1	157408254	157409570	1317	34	164	11.96
chr1	157424136	157424877	742	15	59.95	9.56
chr1	157425005	157426352	1348	36	177.27	11.96
chr1	158287861	158289117	1257	27	107.71	9.56
chr1	158289744	158290455	712	14	62.13	10.76
chr1	158292717	158293854	1138	27	125.03	14.35
chr1	158296110	158296689	580	11	50.28	8.37
chr1	158299962	158300530	569	12	58.53	9.56
chr1	158305232	158305994	763	15	65.55	11.96
chr1	158316007	158317979	1973	51	237.58	11.96
chr1	158318001	158320187	2187	69	367.04	15.54
chr1	158364145	158364644	500	11	56.69	8.37
chr1	158365545	158366124	580	12	57.64	8.37
chr1	158368601	158369159	559	11	51.85	9.56
chr1	158637512	158638211	700	15	70.47	10.76
chr1	159217212	159218383	1172	28	129.79	10.76
chr1	159218430	159219079	650	15	74.77	9.56
chr1	159223707	159224655	949	20	87.75	11.96
chr1	159224858	159225410	553	11	52.32	8.37
chr1	159493988	159494539	552	12	59.96	9.56
chr1	159494550	159497924	3375	116	641.62	15.54
chr1	159726298	159728016	1719	41	182.11	15.54
chr1	160223896	160224500	605	12	55.67	8.37
chr1	160306408	160307277	870	20	94.31	11.96
chr1	160900435	160901358	924	23	113.09	11.96
chr1	161057617	161058295	679	13	57.38	10.76
chr1	161058901	161059649	749	18	89.5	10.76
chr1	161059857	161060891	1035	25	118.65	16.74
chr1	161179029	161179703	675	13	57.67	9.56
chr1	161179903	161180546	644	14	67.53	9.56
chr1	161305976	161306826	851	19	88.25	10.76
chr1	162557307	162557769	463	11	60.08	10.76
chr1	162949717	162950742	1026	26	127.5	13.15
chr1	162952813	162953361	549	11	52.63	8.37
chr1	163011458	163012661	1204	27	119.32	9.56
chr1	163352078	163353471	1394	48	277.45	19.13
chr1	163353478	163354671	1194	30	143.6	13.15
chr1	163359560	163360129	570	11	51.02	9.56
chr1	163362281	163362884	604	12	55.75	7.17
chr1	163362926	163363396	471	11	59.32	8.37
chr1	163438658	163439235	578	11	50.42	8.37
chr1	163468382	163469115	734	15	67.75	10.76
chr1	163470022	163472674	2653	101	601.48	19.13
chr1	163472688	163473163	476	13	75.58	14.35
chr1	163579980	163580961	982	26	131.87	14.35
chr1	163583153	163583800	648	14	67.19	10.76
chr1	163583898	163588570	4673	148	766.5	22.72
chr1	163588802	163592159	3358	127	747.58	22.72
chr1	163592714	163594976	2263	99	644.29	26.3
chr1	163596592	163597162	571	11	50.94	7.17
chr1	163601610	163602208	599	12	56.13	9.56
chr1	163607171	163608581	1411	31	132.28	10.76
chr1	163610510	163613219	2710	86	454.56	17.93
chr1	163614831	163615353	523	12	62.53	9.56
chr1	163616656	163617660	1005	23	105.73	11.96
chr1	163622291	163622796	506	12	64.11	9.56
chr1	163623968	163625544	1577	41	195.32	10.76
chr1	163626457	163627078	622	13	61.76	8.37
chr1	163630490	163632309	1820	54	278.65	14.35
chr1	163633916	163635096	1181	29	128.98	9.56
chr1	163638717	163639641	925	25	129.43	14.35
chr1	163651467	163652304	838	17	74.37	9.56
chr1	163678733	163683610	4878	195	1178.29	26.3
chr1	163685027	163685781	755	15	66.14	10.76
chr1	163698240	163698820	581	11	50.2	8.37
chr1	163766997	163767698	702	15	70.31	10.76
chr1	163780288	163780801	514	11	55.48	9.56
chr1	163781046	163781624	579	11	50.35	9.56
chr1	163806308	163806957	650	13	59.55	9.56
chr1	163807201	163807611	411	11	65.43	11.96
chr1	163810885	163811464	580	11	50.28	8.37
chr1	163816148	163816691	544	13	68.6	10.76
chr1	163821456	163823047	1592	38	170.12	11.96
chr1	163824115	163824786	672	16	80.7	9.56
chr1	163825543	163826421	879	16	64.38	13.15
chr1	163829261	163831277	2017	49	217.63	15.54
chr1	163848479	163849488	1010	23	105.3	9.56
chr1	163853153	163854317	1165	26	115.02	8.37
chr1	163856909	163857477	569	13	66.29	11.96
chr1	163872666	163873246	581	11	50.2	8.37
chr1	163873355	163874036	682	17	87.82	13.15
chr1	163874871	163875366	496	11	57.04	9.56
chr1	163875800	163876643	844	24	129.67	14.35
chr1	163877053	163879365	2313	64	309.87	15.54
chr1	163884556	163885245	690	16	79.05	9.56
chr1	163885543	163887578	2036	64	332.09	17.93
chr1	163888884	163889652	769	14	58.07	9.56
chr1	163891508	163892042	535	11	53.74	9.56
chr1	164382496	164383131	636	16	84.15	11.96
chr1	164398297	164398976	680	13	57.31	10.76
chr1	164398997	164402411	3415	136	826.49	21.52
chr1	164403037	164403862	826	20	98.29	11.96
chr1	164406862	164407416	555	11	52.16	8.37
chr1	165148255	165149129	875	17	71.63	10.76
chr1	165153194	165154058	865	19	87.08	11.96
chr1	165154189	165159369	5181	191	1094.33	21.52
chr1	165168072	165168834	763	14	58.48	11.96
chr1	165175573	165177061	1489	35	156.01	10.76
chr1	165177965	165178549	585	13	64.87	9.56
chr1	165181186	165185964	4779	167	925.04	20.32
chr1	165187808	165188552	745	14	52.84	10.76
chr1	165188670	165189738	1069	24	107.92	9.56
chr1	165206717	165207660	944	17	66.87	11.96
chr1	165208016	165211333	3318	117	658.55	27.5
chr1	165211452	165213478	2027	80	492.09	21.52
chr1	165214454	165215743	1290	26	105.24	10.76
chr1	165216437	165217019	583	12	57.39	10.76
chr1	165340203	165340788	586	13	64.78	9.56
chr1	165341072	165341722	651	12	52.3	9.56
chr1	165363338	165364138	801	20	100.66	13.15
chr1	165674357	165675285	929	28	154.81	16.74
chr1	165889444	165890011	568	11	51.17	8.37
chr1	165892412	165893316	905	17	69.5	10.76
[truncated: 28,684 more rows]

## Sheet: KB_H3K4Me3
Chr	Start	End	Length	Tags	Pval(-10*LOG10)	Fold enrichment
chr1	702772	705329	2558	80	330.64	17.83
chr1	751129	752871	1743	45	162.57	14.46
chr1	828511	831638	3128	162	957.55	41.45
chr1	845252	847309	2058	48	155.47	12.05
chr1	847717	852362	4646	234	1347.81	22.65
chr1	859885	861860	1976	49	168.71	9.16
chr1	863866	869125	5260	265	1523.63	28.92
chr1	882311	887312	5002	586	3100	115.2
chr1	882311	887312	5002	586	3100	115.2
chr1	890585	893367	2783	177	1187.52	38.56
chr1	890585	893367	2783	177	1187.52	38.56
chr1	900303	901993	1691	53	225.43	14.94
chr1	900303	901993	1691	53	225.43	14.94
chr1	922482	927656	5175	344	2345.91	34.22
chr1	937780	940550	2771	435	3100	90.62
chr1	945147	947713	2567	186	1343.9	38.56
chr1	948721	950781	2061	47	148.95	8.68
chr1	957038	960743	3706	123	524.93	15.42
chr1	964378	966841	2464	89	412.87	20.73
chr1	983264	986197	2934	209	1492.77	37.6
chr1	988385	990167	1783	96	590.84	25.06
chr1	992702	996002	3301	223	1543.72	40.49
chr1	1004311	1006571	2261	144	971.2	27.48
chr1	1039284	1042665	3382	207	1353.26	38.56
chr1	1061430	1063452	2023	51	177.87	10.12
chr1	1082007	1084435	2429	173	1239.66	43.86
chr1	1087188	1089513	2326	61	217.95	11.57
chr1	1125145	1127196	2052	56	209.29	9.64
chr1	1130541	1132740	2200	91	468.16	18.8
chr1	1155259	1159027	3769	444	3100	101.22
chr1	1155259	1159027	3769	444	3100	101.22
chr1	1170900	1172822	1923	38	105.14	7.71
chr1	1196685	1200803	4119	539	3100	99.3
chr1	1218533	1219973	1441	36	129.02	13.01
chr1	1229094	1235991	6898	684	3100	55.91
chr1	1229094	1235991	6898	684	3100	55.91
chr1	1248722	1250620	1899	70	334.07	28.92
chr1	1248722	1250620	1899	70	334.07	28.92
chr1	1272961	1275369	2409	144	934.87	30.37
chr1	1323246	1325612	2367	186	1404.91	41.94
chr1	1323246	1325612	2367	186	1404.91	41.94
chr1	1332152	1333086	935	30	137.48	10.6
chr1	1351088	1352077	990	29	123.6	11.09
chr1	1359036	1359878	843	19	68.02	8.19
chr1	1435573	1438137	2565	224	1783.12	59.29
chr1	1463415	1467212	3798	222	1409.19	34.71
chr1	1463415	1467212	3798	222	1409.19	34.71
chr1	1498008	1501846	3839	791	3100	126.77
chr1	1511104	1512240	1137	36	159.89	13.01
chr1	1521702	1525266	3565	146	733.4	20.73
chr1	1525350	1527002	1653	127	943.84	39.04
chr1	1538827	1543086	4260	476	3100	55.43
chr1	1552833	1557887	5055	316	2079.75	37.12
chr1	1552833	1557887	5055	316	2079.75	37.12
chr1	1579926	1580866	941	86	715.54	36.63
chr1	1604055	1605782	1728	43	150.5	10.12
chr1	1604055	1605782	1728	43	150.5	10.12
chr1	1645158	1646028	871	87	755.59	32.78
chr1	1645158	1646028	871	87	755.59	32.78
chr1	1697606	1702530	4925	620	3100	74.71
chr1	1702840	1704987	2148	80	382.2	18.32
chr1	1779104	1780886	1783	30	70.5	7.71
chr1	1808869	1814238	5370	452	3100	46.76
chr1	1815587	1816884	1298	23	60.78	6.27
chr1	1829143	1832214	3072	265	2091.56	38.56
chr1	1838596	1842181	3586	310	2445.07	57.36
chr1	1864627	1865918	1292	35	135.95	11.09
chr1	1880647	1882204	1558	52	233.55	16.87
chr1	1924211	1925942	1732	96	601.83	19.28
chr1	1939063	1942070	3008	125	637.77	25.55
chr1	1965679	1966728	1050	19	53.7	6.27
chr1	1967663	1969673	2011	52	185.64	12.05
chr1	1970000	1973956	3957	399	3100	64.59
chr1	2036321	2038274	1954	45	144.77	10.6
chr1	2053433	2055951	2519	140	869.23	28.92
chr1	2110153	2112297	2145	96	521.74	23.62
chr1	2110153	2112297	2145	96	521.74	23.62
chr1	2110153	2112297	2145	96	521.74	23.62
chr1	2113809	2117255	3447	234	1623.24	40.01
chr1	2113809	2117255	3447	234	1623.24	40.01
chr1	2113809	2117255	3447	234	1623.24	40.01
chr1	2119811	2121414	1604	70	379.02	26.99
chr1	2124616	2128054	3439	194	1207.22	33.26
chr1	2133176	2135313	2138	107	625.47	26.03
chr1	2147403	2154555	7153	936	3100	72.78
chr1	2168403	2171081	2679	87	369.89	12.53
chr1	2198796	2201021	2226	39	92.6	6.75
chr1	2234576	2237514	2939	89	355.45	16.39
chr1	2310843	2315016	4174	490	3100	87.25
chr1	2310843	2315016	4174	490	3100	87.25
chr1	2332079	2336737	4659	554	3100	62.18
chr1	2363784	2365192	1409	27	75.97	9.16
chr1	2388373	2389372	1000	18	51.22	6.75
chr1	2444471	2449065	4595	363	2725.88	71.34
chr1	2449776	2452194	2419	79	339.19	16.39
chr1	2455603	2457160	1558	30	83.39	7.23
chr1	2461521	2463341	1821	35	94.79	10.12
chr1	2464132	2465722	1591	26	55.57	7.71
chr1	2466404	2470208	3805	325	2546.21	48.2
chr1	2504124	2505767	1644	32	89.17	6.75
chr1	2505851	2509988	4138	473	3100	83.87
chr1	2531845	2533405	1561	35	112.74	9.64
chr1	2548897	2552481	3585	157	827.05	27.48
chr1	2562365	2565864	3500	357	3053.67	48.2
chr1	2694620	2697549	2930	93	386.39	17.83
chr1	2967718	2971344	3627	215	1377.41	29.4
chr1	2972787	2978424	5638	208	954.72	16.87
chr1	2972787	2978424	5638	208	954.72	16.87
chr1	2978706	2981353	2648	70	249.58	13.5
chr1	3153371	3154473	1103	19	50.64	5.3
chr1	3298982	3301494	2513	132	791.56	24.1
chr1	3359292	3363154	3863	321	2479.27	53.99
chr1	3377278	3378943	1666	30	76.9	6.75
chr1	3436149	3438985	2837	176	1163.51	31.81
chr1	3515676	3519541	3866	279	1999.17	41.45
chr1	3529246	3533086	3841	432	3100	73.27
chr1	3554712	3560303	5592	697	3100	58.81
chr1	3554712	3560303	5592	697	3100	58.81
chr1	3580190	3583044	2855	97	426.31	21.21
chr1	3589609	3591444	1836	37	105.13	8.68
chr1	3650764	3654433	3670	451	3100	84.84
chr1	3677084	3680821	3738	288	2138.8	46.27
chr1	3677084	3680821	3738	288	2138.8	46.27
chr1	3698469	3704126	5658	595	3100	71.34
chr1	3761576	3766034	4459	467	3100	72.3
chr1	3761576	3766034	4459	467	3100	72.3
chr1	3804729	3808317	3589	738	3100	103.15
chr1	3804729	3808317	3589	738	3100	103.15
chr1	3816715	3818413	1699	43	153.05	13.98
chr1	4609659	4611396	1738	36	105.94	7.71
chr1	4612027	4617632	5606	242	1249.89	21.21
chr1	4669862	4672252	2391	108	588.23	26.03
chr1	4979528	4981074	1547	25	57.72	6.75
chr1	5078595	5080268	1674	35	104.48	8.19
chr1	5184768	5186926	2159	41	107.06	5.3
chr1	5406700	5408816	2117	107	629.6	24.58
chr1	5878206	5880899	2694	93	414.97	13.5
chr1	5962430	5964076	1647	76	426.2	18.32
chr1	5972709	5977526	4818	574	3100	56.88
chr1	6007945	6009631	1687	33	92.05	6.75
chr1	6016263	6017906	1644	27	62.69	6.27
chr1	6034956	6036192	1237	44	210.8	13.98
chr1	6109867	6111274	1408	32	105.82	8.68
chr1	6130255	6132557	2303	128	796.63	32.3
chr1	6160952	6164577	3626	166	901.42	24.58
chr1	6165479	6166775	1297	21	50.55	6.27
chr1	6179316	6183991	4676	1111	3100	119.06
chr1	6186798	6193237	6440	479	3100	49.65
chr1	6216534	6230347	13814	1307	3100	91.58
chr1	6216534	6230347	13814	1307	3100	91.58
chr1	6216534	6230347	13814	1307	3100	91.58
chr1	6230750	6233628	2879	80	296.8	15.42
chr1	6241650	6245072	3423	191	1180.7	28.92
chr1	6366690	6369926	3237	190	1212.54	30.37
chr1	6373991	6377564	3574	434	3100	72.3
chr1	6396671	6397593	923	17	50.37	4.82
chr1	6400558	6404070	3513	195	1200.95	37.6
chr1	6405603	6408835	3233	158	898.82	22.65
chr1	6428700	6431878	3179	128	637.3	17.35
chr1	6442095	6444181	2087	84	424.94	13.5
chr1	6442095	6444181	2087	84	424.94	13.5
chr1	6447635	6449530	1896	49	175.77	8.68
chr1	6447635	6449530	1896	49	175.77	8.68
chr1	6466412	6469764	3353	307	2493.68	51.09
chr1	6471379	6475289	3911	466	3100	79.05
chr1	6477545	6481315	3771	301	2277.27	47.72
chr1	6501616	6502880	1265	22	57.36	4.82
chr1	6534943	6538041	3099	364	3100	80.5
chr1	6534943	6538041	3099	364	3100	80.5
chr1	6560980	6563968	2989	442	3100	64.11
chr1	6560980	6563968	2989	442	3100	64.11
chr1	6581221	6587978	6758	1176	3100	93.03
chr1	6594198	6599378	5181	505	3100	84.35
chr1	6606434	6609164	2731	297	2623.48	65.07
chr1	6606434	6609164	2731	297	2623.48	65.07
chr1	6676237	6677947	1711	61	285.86	21.21
chr1	6682260	6684919	2660	589	3100	133.04
chr1	6717002	6718903	1902	39	112.26	8.68
chr1	6740120	6741378	1259	22	57.7	7.23
chr1	6752997	6754254	1258	22	57.76	5.3
chr1	6765466	6770275	4810	560	3100	74.23
chr1	6938708	6940115	1408	23	54.85	4.82
chr1	6943437	6947331	3895	396	3100	75.68
chr1	7051694	7053618	1925	133	942.17	35.19
chr1	7099786	7101482	1697	43	153.22	12.05
chr1	7361410	7363010	1601	49	205.45	15.42
chr1	7518463	7520285	1823	45	155.51	10.6
chr1	7651613	7653536	1924	65	290.41	16.87
chr1	7661758	7664706	2949	200	1390.1	27.96
chr1	7684414	7689003	4590	216	1189.21	34.71
chr1	7734416	7736011	1596	74	416.88	24.1
chr1	7752135	7755786	3652	563	3100	95.92
chr1	7752135	7755786	3652	563	3100	95.92
chr1	7764797	7766538	1742	92	560.12	26.03
chr1	7766789	7768661	1873	144	1080.33	41.94
chr1	7867110	7869548	2439	96	474.74	20.73
chr1	7884798	7885766	969	19	58.82	7.23
chr1	7894853	7896821	1969	58	232	17.35
chr1	7924401	7926030	1630	63	313.79	16.39
chr1	7935995	7937725	1731	88	523.51	23.14
chr1	7942342	7946016	3675	644	3100	102.19
chr1	7986540	7988418	1879	34	85.9	6.75
chr1	7997555	7998900	1346	22	53.03	5.3
chr1	8000644	8002996	2353	50	145.66	7.71
chr1	8003666	8011513	7848	899	3100	93.99
chr1	8148387	8150254	1868	40	120.53	6.75
chr1	8199243	8201119	1877	71	345.47	14.94
chr1	8241755	8242932	1178	20	51.73	4.82
chr1	8249109	8250997	1889	37	101.68	12.53
chr1	8296514	8298709	2196	55	189.3	9.64
chr1	8299828	8302122	2295	186	1428.25	49.65
chr1	8377872	8379351	1480	25	61.16	5.78
chr1	8404019	8408348	4330	469	3100	60.25
chr1	8441797	8444251	2455	82	358.14	13.01
chr1	8507484	8509491	2008	50	172.54	11.57
chr1	8682625	8687366	4742	629	3100	53.99
chr1	8694030	8695955	1926	49	173.08	13.98
chr1	8771803	8773098	1296	32	115.06	7.71
chr1	8796754	8801706	4953	684	3100	80.98
chr1	8854994	8863691	8698	899	3100	90.14
chr1	8925388	8927007	1620	28	63.92	5.3
chr1	8991573	8992923	1351	42	180.92	18.32
chr1	9053590	9055141	1552	47	195.94	11.09
chr1	9109951	9113246	3296	289	2297.9	63.14
chr1	9162238	9167454	5217	713	3100	72.3
chr1	9178581	9179781	1201	22	61.07	5.3
chr1	9180127	9182393	2267	98	519.14	33.74
chr1	9183070	9186094	3025	197	1337.65	28.44
chr1	9216027	9218843	2817	235	1825.6	58.81
chr1	9235092	9236776	1685	30	75.81	5.3
chr1	9262505	9264030	1526	29	79.81	9.16
chr1	9273774	9277768	3995	307	2275	67
chr1	9410251	9413093	2843	418	3100	81.94
chr1	9477305	9478763	1459	85	552.11	22.17
chr1	9520874	9523793	2920	302	2604.6	80.5
chr1	9570003	9574481	4479	289	1940.49	67.96
chr1	9575252	9577271	2020	52	184.83	10.12
chr1	9609334	9610699	1366	27	78.73	10.6
chr1	9633464	9636575	3112	266	2089.42	42.42
chr1	9633464	9636575	3112	266	2089.42	42.42
chr1	9668601	9674451	5851	886	3100	71.34
chr1	9696455	9697715	1261	26	80	6.27
chr1	9699554	9701100	1547	36	120.13	9.16
chr1	9774637	9775798	1162	21	57.94	5.3
chr1	9804180	9809217	5038	689	3100	88.69
chr1	9817658	9819020	1363	36	136.12	8.68
chr1	9856928	9858718	1791	55	229.18	21.21
chr1	9891063	9894376	3314	516	3100	84.84
chr1	9911312	9913097	1786	39	120.44	9.64
chr1	9924206	9927349	3144	688	3100	110.38
chr1	9924206	9927349	3144	688	3100	110.38
chr1	9978472	9981497	3026	193	1294.93	33.74
chr1	10014120	10017982	3863	851	3100	139.3
chr1	10191342	10196625	5284	802	3100	117.13
chr1	10380394	10384120	3727	802	3100	106.04
chr1	10411643	10414589	2947	571	3100	110.86
chr1	10453226	10456015	2790	648	3100	118.58
chr1	10456492	10459494	3003	518	3100	120.99
chr1	10490805	10491925	1121	22	66.1	9.16
chr1	10500662	10502644	1983	42	124.28	8.68
chr1	10510451	10514686	4236	277	1865.02	27.48
chr1	10620140	10623167	3028	120	591.55	22.65
chr1	10631129	10635060	3932	143	655.18	14.46
chr1	10675184	10679097	3914	154	749.22	25.06
chr1	10686109	10688063	1955	84	445.87	21.21
chr1	10691178	10692889	1712	32	79.57	9.16
chr1	10775101	10780317	5217	445	3100	48.2
chr1	10796819	10798477	1659	27	61.94	6.75
chr1	10817255	10819171	1917	65	291.28	14.94
chr1	10848096	10850759	2664	147	907.44	31.33
chr1	10870649	10872952	2304	122	737.08	28.92
chr1	10882495	10885533	3039	154	898.28	24.58
chr1	10923614	10925560	1947	45	145.32	13.98
chr1	10942880	10944317	1438	41	164.07	12.05
chr1	10962553	10964348	1796	74	383.25	22.65
chr1	10993881	10997898	4018	682	3100	110.38
chr1	11027304	11029150	1847	49	180.29	13.5
chr1	11034736	11036754	2019	48	158.61	10.6
chr1	11040447	11044500	4054	670	3100	88.69
chr1	11080486	11083141	2656	572	3100	107.97
chr1	11243468	11246460	2993	449	3100	98.33
chr1	11254795	11259128	4334	617	3100	130.63
chr1	11267732	11270475	2744	59	171.44	9.64
chr1	11337303	11339767	2465	116	648.6	22.17
chr1	11395854	11397173	1320	24	64.87	6.75
chr1	11460191	11464001	3811	329	2591.5	66.04
chr1	11480918	11483288	2371	75	314.2	12.53
chr1	11576206	11577871	1666	27	61.59	8.19
chr1	11630495	11632310	1816	83	460.54	25.06
chr1	11632334	11634416	2083	72	325.82	13.5
chr1	11634653	11638841	4189	383	3102.26	52.06
chr1	11634653	11638841	4189	383	3102.26	52.06
chr1	11645837	11647821	1985	99	578.94	29.4
chr1	11645837	11647821	1985	99	578.94	29.4
chr1	11661533	11666108	4576	638	3100	100.74
chr1	11671736	11676850	5115	817	3100	80.02
chr1	11671736	11676850	5115	817	3100	80.02
chr1	11701166	11702937	1772	92	553.95	29.89
chr1	11713859	11715488	1630	32	90.06	9.16
chr1	11717450	11720890	3441	577	3100	89.66
chr1	11743890	11745960	2071	65	272.84	14.46
chr1	11766952	11768405	1454	51	238.84	13.5
chr1	11784404	11790870	6467	1131	3100	91.58
chr1	11784404	11790870	6467	1131	3100	91.58
chr1	11840513	11842698	2186	112	663.98	27.48
chr1	11865366	11866715	1350	26	74.08	7.23
chr1	11880490	11882513	2024	74	349.82	20.24
chr1	11889143	11893117	3975	256	1719.77	55.43
chr1	11906207	11908732	2526	122	683.96	28.44
chr1	11916040	11918801	2762	349	3100	76.64
chr1	11961356	11964958	3603	497	3100	120.02
chr1	12000675	12003702	3028	483	3100	111.35
chr1	12044660	12048247	3588	593	3100	78.09
chr1	12049279	12051524	2246	55	185.02	9.64
chr1	12061030	12062577	1548	79	473.27	17.83
chr1	12148753	12151200	2448	87	398.78	14.46
chr1	12211584	12214913	3330	364	3216.93	82.43
chr1	12223826	12226115	2290	45	121.07	8.19
chr1	12522266	12523890	1625	47	188.1	12.53
chr1	12576706	12580029	3324	270	2064.49	44.83
chr1	12596597	12603703	7107	1383	3100	100.74
chr1	12696693	12701070	4378	165	766.43	18.8
chr1	13710856	13714213	3358	195	1235.58	38.56
chr1	13780814	13786069	5256	804	3100	93.99
chr1	13898195	13901039	2845	334	3052.75	66.52
chr1	13946757	13950211	3455	330	2735.67	63.63
chr1	13963089	13964190	1102	21	61.62	6.27
chr1	14090578	14093540	2963	272	2215.25	42.42
chr1	14334468	14336149	1682	31	75.98	5.78
chr1	14602584	14605099	2516	56	163.88	7.23
chr1	14791307	14793398	2092	44	128.48	8.19
chr1	14796003	14802177	6175	692	3100	72.3
chr1	14924241	14926008	1768	31	76.41	7.23
chr1	14930294	14931494	1201	28	96.89	8.68
chr1	14931566	14933891	2326	86	398.86	13.01
chr1	14940900	14942148	1249	22	58.26	6.27
chr1	15121879	15123351	1473	56	269.1	20.24
chr1	15123519	15125248	1730	152	1221.72	40.49
chr1	15288903	15290590	1688	26	55.75	7.23
chr1	15310803	15312155	1353	28	85.44	6.27
chr1	15310803	15312155	1353	28	85.44	6.27
chr1	15350366	15354846	4481	705	3100	79.53
chr1	15350366	15354846	4481	705	3100	79.53
chr1	15404668	15407356	2689	118	627.7	17.35
chr1	15445073	15447678	2606	184	1310.53	44.35
chr1	15471035	15472093	1059	48	272.99	20.24
chr1	15582516	15585971	3456	182	1084.88	28.44
chr1	15586793	15588601	1809	47	170.13	12.05
chr1	15607444	15610946	3503	316	2546.8	62.18
chr1	15706309	15709036	2728	60	178.59	11.09
chr1	15721278	15727371	6094	1073	3100	111.83
chr1	15721278	15727371	6094	1073	3100	111.83
chr1	15782634	15785012	2379	181	1344.1	42.42
chr1	15801237	15803689	2453	269	2387.94	74.71
chr1	15814687	15818283	3597	735	3100	122.43
chr1	15818510	15819436	927	21	74.1	6.27
chr1	15882067	15885198	3132	263	2047.14	59.77
chr1	15940175	15942332	2158	65	263.13	13.5
chr1	15940175	15942332	2158	65	263.13	13.5
chr1	15954324	15961089	6766	580	3100	67.96
chr1	15998828	16000266	1439	23	53.29	5.78
chr1	16031706	16037351	5646	818	3100	82.91
chr1	16045370	16051196	5827	956	3100	102.67
chr1	16045370	16051196	5827	956	3100	102.67
chr1	16084457	16086245	1789	93	560.2	21.69
chr1	16173302	16176221	2920	309	2693.55	54.95
chr1	16211095	16213512	2418	124	733.27	27.96
chr1	16225210	16226715	1506	52	232.15	12.53
chr1	16246533	16249005	2473	126	741.56	32.78
chr1	16271382	16273741	2360	139	895.04	36.15
chr1	16314002	16316314	2313	48	136.69	8.19
chr1	16343718	16346804	3087	119	574.41	18.8
chr1	16350930	16356586	5657	669	3100	79.53
chr1	16360286	16364175	3890	108	394.14	19.76
chr1	16365399	16367727	2329	118	693.25	35.67
chr1	16380320	16382059	1740	31	77.97	7.23
chr1	16404156	16408193	4038	429	3100	76.64
chr1	16409927	16412597	2671	234	1864.63	50.13
chr1	16414545	16417642	3098	480	3100	69.89
chr1	16424781	16428099	3319	360	3170.34	60.73
chr1	16434927	16437311	2385	347	3100	82.43
chr1	16549129	16552577	3449	715	3100	98.33
chr1	16565498	16568616	3119	587	3100	101.71
chr1	16629204	16630718	1515	28	74.99	6.75
chr1	16638961	16641659	2699	623	3100	127.25
chr1	16696725	16699547	2823	217	1615.62	63.63
chr1	16711736	16714269	2534	68	246.51	12.05
chr1	16719261	16721251	1991	149	1100.74	32.3
chr1	16732663	16735342	2680	90	393.05	20.24
chr1	16811016	16814480	3465	543	3100	87.25
chr1	16817211	16818350	1140	32	129.76	12.05
chr1	16842603	16844808	2206	198	1601.25	60.25
chr1	16846284	16847805	1522	42	162.73	13.98
chr1	16891423	16894091	2669	99	466.91	20.73
chr1	16897863	16901230	3368	159	883.11	26.99
chr1	16906177	16907820	1644	30	72.87	9.16
chr1	16925894	16927060	1167	20	52.33	7.71
chr1	17070590	17072823	2234	49	148.22	8.19
chr1	17073273	17074854	1582	34	105.05	9.16
chr1	17087110	17089279	2170	93	490.6	25.55
chr1	17094310	17096830	2521	64	220.61	12.53
chr1	17102181	17105232	3052	263	2074.85	52.54
chr1	17112119	17114475	2357	146	968.2	37.12
chr1	17119972	17122765	2794	245	1952.01	61.7
chr1	17137443	17138516	1074	32	136.75	12.05
chr1	17159136	17160911	1776	36	103.36	7.23
chr1	17177112	17180821	3710	389	3100	74.23
chr1	17209020	17212926	3907	360	2928.98	60.25
chr1	17251064	17253994	2931	561	3100	122.91
chr1	17316651	17319797	3147	428	3100	62.66
chr1	17414979	17416243	1265	26	79.72	9.64
chr1	17447520	17448587	1068	19	52.64	6.75
chr1	17631804	17641283	9480	1070	3100	72.3
chr1	17669052	17670377	1326	44	199.34	14.46
chr1	17736855	17740823	3969	489	3100	66.04
chr1	17745344	17747815	2472	80	340.6	13.5
chr1	17748177	17751655	3479	95	343.32	11.09
chr1	17763724	17765426	1703	28	59.78	6.75
chr1	17771508	17773638	2131	38	92.67	5.3
chr1	17785737	17787601	1865	33	81.43	6.27
chr1	18305214	18311392	6179	847	3100	60.25
chr1	18431260	18433316	2057	40	107.85	5.78
chr1	18492790	18495660	2871	92	385.62	13.01
chr1	18496159	18498423	2265	71	296.06	14.46
chr1	18551428	18552705	1278	21	51.52	5.3
chr1	18583283	18585112	1830	32	78.18	5.78
chr1	18608824	18610226	1403	30	93.86	7.71
chr1	18615631	18619559	3929	104	362.88	13.5
chr1	18678863	18681993	3131	162	956.95	25.06
chr1	18741081	18742375	1295	21	50.65	5.78
chr1	18755881	18758186	2306	190	1471.18	40.97
chr1	18774254	18775787	1534	26	63.38	7.23
chr1	18797429	18799074	1646	31	83.48	10.12
chr1	18827772	18833179	5408	352	2370.37	36.15
chr1	18834270	18837754	3485	181	1069.25	27.48
chr1	18838456	18847251	8796	358	1758.76	24.1
chr1	18847914	18853685	5772	112	268.9	7.71
chr1	18875074	18876659	1586	25	55.81	6.75
chr1	18891822	18893307	1486	74	437.49	30.37
chr1	18901756	18903192	1437	41	164.17	15.42
chr1	18914441	18917353	2913	142	808.59	26.03
chr1	18982470	18984844	2375	188	1425.34	45.31
chr1	19099610	19103051	3442	447	3100	70.86
chr1	19139882	19141750	1869	52	199.1	10.6
chr1	19147877	19150236	2360	61	208.15	11.09
chr1	19152448	19157591	5144	507	3100	81.46
chr1	19163833	19165052	1220	22	59.94	5.78
chr1	19208636	19210617	1982	34	80.21	5.78
chr1	19407090	19412424	5335	1177	3100	135.45
chr1	19448766	19453412	4647	1160	3100	130.63
chr1	19448766	19453412	4647	1160	3100	130.63
chr1	19472434	19473837	1404	63	349.83	19.28
chr1	19487009	19489041	2033	85	442.07	33.74
chr1	19509089	19512836	3748	581	3100	81.94
chr1	19509089	19512836	3748	581	3100	81.94
chr1	19536875	19538807	1933	65	289.29	13.5
chr1	19655110	19657022	1913	40	117.35	6.75
chr1	19659688	19661258	1571	24	51.78	6.27
chr1	19678415	19686794	8380	866	3100	103.15
chr1	19794485	19797749	3265	743	3100	98.33
chr1	19818410	19819493	1084	20	57.15	6.27
chr1	19827569	19829403	1835	39	116.9	6.75
chr1	19839107	19840484	1378	25	66.86	7.71
chr1	19841755	19845448	3694	319	2513.93	67
chr1	19852199	19853903	1705	60	278.55	13.98
chr1	19862810	19865906	3097	160	944.47	23.14
chr1	19902639	19904216	1578	61	304.45	19.28
chr1	19914145	19915255	1111	21	61.06	6.27
chr1	19997414	20000289	2876	145	844.19	40.49
chr1	20014521	20016791	2271	63	237.01	11.57
chr1	20080338	20083859	3522	433	3100	95.44
chr1	20188960	20190646	1687	26	55.79	8.68
chr1	20350325	20352372	2048	88	466.17	30.37
chr1	20383684	20386657	2974	247	1913.08	48.2
chr1	20411352	20413061	1710	49	193.75	16.39
chr1	20422143	20423800	1658	26	57.15	7.23
chr1	20488754	20491697	2944	154	917.35	26.99
chr1	20541027	20544387	3361	234	1646.93	49.65
chr1	20564129	20566946	2818	248	1979.26	40.49
chr1	20629067	20630157	1091	23	68.12	6.27
chr1	20639435	20640327	893	17	52.27	6.75
chr1	20671341	20673345	2005	112	702	32.3
chr1	20674471	20676894	2424	119	684.34	26.03
chr1	20680518	20681671	1154	20	53.05	6.27
chr1	20681802	20687365	5564	812	3100	70.86
chr1	20692464	20694620	2157	125	799.1	36.63
chr1	20705278	20708192	2915	708	3100	116.17
chr1	20721094	20721975	882	21	77.81	7.71
chr1	20750020	20754500	4481	420	3100	54.47
chr1	20787402	20789497	2096	89	467.2	18.8
chr1	20823740	20825726	1987	46	148.46	10.12
chr1	20831863	20834347	2485	343	3100	89.17
chr1	20858213	20861918	3706	985	3100	130.63
chr1	20894340	20897486	3147	223	1575.43	40.97
chr1	20915021	20918094	3074	247	1879.9	37.12
chr1	20925881	20933276	7396	644	3100	92.55
chr1	20983373	20988056	4684	1078	3100	124.84
chr1	21372499	21377353	4855	686	3100	75.19
chr1	21460217	21462098	1882	45	150.55	11.09
chr1	21487605	21490553	2949	274	2244.88	38.56
chr1	21513166	21514254	1089	19	51.43	6.27
chr1	21521050	21522652	1603	30	80.61	4.82
chr1	21527712	21529175	1464	31	95.49	5.78
chr1	21533221	21535068	1848	67	316.38	19.28
chr1	21542536	21546664	4129	514	3100	73.27
chr1	21634606	21637092	2487	171	1201.38	38.08
chr1	21637792	21640906	3115	188	1220.72	30.37
chr1	21707045	21712078	5034	496	3100	75.19
chr1	21736366	21737830	1465	26	67.17	6.75
chr1	21772667	21774935	2269	69	280.63	14.94
chr1	21805822	21808092	2271	79	357.56	18.32
chr1	21817216	21819272	2057	48	155.55	9.16
chr1	21820176	21823039	2864	161	1003.51	37.12
chr1	21829721	21830551	831	20	75.56	8.68
chr1	21849400	21852522	3123	238	1761.29	52.54
chr1	21857716	21859853	2138	168	1271.28	60.25
chr1	21866792	21869898	3107	345	3072.81	48.2
chr1	21980037	21984431	4395	1045	3100	129.18
chr1	22012712	22014954	2243	122	749.94	28.44
chr1	22120631	22122216	1586	32	92.95	9.16
chr1	22132184	22133724	1541	32	90.17	7.23
chr1	22133939	22137877	3939	418	3100	79.05
chr1	22143029	22144093	1065	35	160.78	11.09
chr1	22222697	22226358	3662	897	3100	139.79
chr1	22250761	22253892	3132	438	3100	105.08
chr1	22287786	22290455	2670	66	220.92	10.12
chr1	22320102	22321340	1239	22	58.84	4.82
chr1	22335637	22337041	1405	24	60.07	6.27
chr1	22339924	22342087	2164	158	1150.04	36.63
chr1	22342223	22343790	1568	79	469.29	27.96
chr1	22519268	22521099	1832	32	78.07	7.71
chr1	22548522	22551350	2829	108	519.21	19.28
chr1	22615435	22616661	1227	25	76.45	9.64
chr1	22627258	22628875	1618	59	282.07	20.73
chr1	22641266	22643320	2055	39	102.44	6.75
chr1	22649193	22652806	3614	529	3100	89.17
chr1	22752978	22756540	3563	83	256.83	8.19
chr1	22761132	22764215	3084	201	1364.96	51.58
chr1	22824830	22826194	1365	25	67.62	8.19
chr1	22827751	22829890	2140	64	257.71	10.6
chr1	22837802	22838845	1044	20	59.66	7.71
chr1	22860876	22862022	1147	22	64.42	6.75
chr1	22908241	22911952	3712	130	579.3	20.73
chr1	23003779	23004966	1188	21	56.43	5.78
chr1	23174791	23176127	1337	22	53.5	6.27
chr1	23216960	23221386	4427	912	3100	120.5
chr1	23365076	23369351	4276	548	3100	78.57
chr1	23375768	23378221	2454	211	1655.85	51.09
chr1	23414567	23417713	3147	212	1466.37	40.01
chr1	23461818	23463698	1881	48	170.38	9.16
chr1	23540277	23544913	4637	665	3100	90.14
chr1	23565769	23571971	6203	837	3100	110.86
chr1	23565769	23571971	6203	837	3100	110.86
chr1	23593272	23594975	1704	30	74.75	7.23
chr1	23601982	23603766	1785	56	237.4	18.8
chr1	23621841	23625254	3414	182	1093.57	29.89
chr1	23634758	23637394	2637	104	513.44	25.06
chr1	23681428	23685033	3606	502	3100	79.53
chr1	23728229	23731726	3498	313	2512.5	44.35
chr1	23738469	23739673	1205	24	72.09	8.19
chr1	23752232	23762055	9824	1667	3100	122.91
chr1	23765922	23768944	3023	196	1327.52	38.08
chr1	23796322	23798907	2586	76	297.98	9.16
chr1	23817422	23819983	2562	152	981.03	27.96
chr1	23833496	23834890	1395	28	82.57	8.19
chr1	23889999	23896420	6422	1061	3100	148.46
chr1	23940708	23944981	4274	565	3100	73.75
chr1	23975620	23979427	3808	739	3100	143.64
chr1	23988078	23992539	4462	685	3100	116.65
chr1	23997360	24001599	4240	640	3100	91.58
chr1	23997360	24001599	4240	640	3100	91.58
chr1	24022556	24025578	3023	495	3100	117.61
chr1	24036576	24038670	2095	149	1070.1	33.74
chr1	24065795	24068614	2820	310	2750.94	57.84
chr1	24101050	24103560	2511	81	343.67	14.94
chr1	24269644	24271214	1571	57	272.06	22.65
chr1	24310880	24312029	1150	48	257.62	18.32
chr1	24348507	24351228	2722	229	1787.5	46.76
chr1	24384239	24387923	3685	406	3100	75.68
chr1	24485121	24486584	1464	29	83.76	6.27
chr1	24517447	24523123	5677	587	3100	60.73
chr1	24591501	24592980	1480	28	77.11	6.75
chr1	24611003	24613520	2518	343	3100	90.14
chr1	24613758	24616432	2675	467	3100	102.19
chr1	24662096	24664796	2701	144	869.92	27.48
chr1	24700027	24703801	3775	458	3100	73.27
chr1	24705771	24706871	1101	19	50.75	5.78
chr1	24739700	24740903	1204	21	55.52	5.78
chr1	24754141	24756532	2392	178	1306.27	36.15
chr1	24840148	24845176	5029	1120	3100	123.88
chr1	24903444	24905738	2295	74	315.42	21.21
chr1	24923108	24925145	2038	78	381.11	14.46
chr1	24934443	24935702	1260	21	52.46	8.19
chr1	24940713	24942151	1439	34	116.07	10.12
chr1	24942219	24947027	4809	483	3100	85.32
chr1	25046330	25048394	2065	141	990.76	31.81
chr1	25124948	25135205	10258	624	3100	39.53
chr1	25429920	25432980	3061	890	3100	130.15
chr1	25437864	25440239	2376	351	3100	62.18
chr1	25443678	25447961	4284	1052	3100	147.5
chr1	25452505	25453589	1085	20	57.09	5.78
chr1	25465263	25466038	776	19	73.67	8.19
chr1	25535579	25539023	3445	422	3100	76.64
chr1	25627809	25631863	4055	494	3100	96.89
chr1	25704424	25705878	1455	60	314.55	17.83
chr1	25716116	25717572	1457	73	433.6	20.73
chr1	25741956	25744715	2760	261	2158.46	52.06
chr1	25766964	25768136	1173	20	52	5.3
chr1	25784514	25786237	1724	47	178.13	13.01
chr1	25786257	25787064	808	24	106.23	10.6
chr1	25813988	25819320	5333	538	3100	77.6
chr1	25905043	25907224	2182	56	197.2	9.64
chr1	25978725	25980504	1780	37	108.91	8.68
chr1	25995003	25997193	2191	52	170.21	11.57
chr1	25997905	26000696	2792	215	1602.51	62.18
chr1	26016247	26021538	5292	938	3100	93.99
chr1	26016247	26021538	5292	938	3100	93.99
chr1	26016247	26021538	5292	938	3100	93.99
chr1	26016247	26021538	5292	938	3100	93.99
chr1	26056723	26059963	3241	681	3100	129.66
chr1	26073112	26076337	3226	319	2690.78	47.24
chr1	26091260	26092222	963	20	65.16	8.68
chr1	26102580	26107176	4597	628	3100	93.03
chr1	26120567	26123828	3262	550	3100	79.05
chr1	26195566	26198202	2637	405	3100	90.62
chr1	26219782	26222152	2371	155	1059.81	47.24
chr1	26233060	26236346	3287	510	3100	91.58
chr1	26243462	26246680	3219	180	1115.52	28.92
chr1	26292865	26294778	1914	67	307.61	13.5
chr1	26308560	26312725	4166	647	3100	81.46
chr1	26353326	26356302	2977	261	2077.63	37.6
chr1	26357224	26359100	1877	53	205.41	14.94
chr1	26359392	26361953	2562	221	1748.47	34.22
chr1	26362424	26365475	3052	192	1267.33	49.17
chr1	26367620	26371120	3501	444	3100	98.81
chr1	26375849	26377950	2102	132	884.74	32.78
chr1	26398860	26401484	2625	213	1633.03	44.83
chr1	26423382	26425868	2487	325	3116.1	66.04
chr1	26432194	26435358	3165	774	3100	134.48
chr1	26477389	26482372	4984	509	3100	62.66
chr1	26477389	26482372	4984	509	3100	62.66
chr1	26477389	26482372	4984	509	3100	62.66
chr1	26503986	26507150	3165	518	3100	134
chr1	26516167	26517849	1683	38	122.04	9.16
chr1	26516167	26517849	1683	38	122.04	9.16
chr1	26533703	26536759	3057	311	2660.31	65.55
chr1	26549026	26550604	1579	27	66.08	6.75
chr1	26557504	26560997	3494	333	2757.33	47.24
chr1	26607442	26615510	8069	1546	3100	111.35
chr1	26615660	26619554	3895	191	1084.48	22.65
chr1	26628253	26632981	4729	636	3100	146.05
chr1	26628253	26632981	4729	636	3100	146.05
chr1	26668286	26673913	5628	770	3100	85.32
chr1	26668286	26673913	5628	770	3100	85.32
chr1	26698707	26701565	2859	383	3100	71.82
chr1	26727452	26731958	4507	649	3100	111.35
chr1	26740298	26741535	1238	26	81.62	7.23
chr1	26817064	26821716	4653	721	3100	77.12
chr1	26890415	26901538	11124	1267	3100	82.91
chr1	26921411	26924943	3533	180	1049.99	23.14
chr1	26982582	26984193	1612	27	59.38	7.23
chr1	26984968	26988931	3964	908	3100	120.99
chr1	26998385	26999960	1576	41	150.63	7.71
chr1	27024462	27027630	3169	232	1679.92	46.27
chr1	27060906	27065350	4445	810	3100	84.35
chr1	27087394	27090446	3053	613	3100	102.19
chr1	27087394	27090446	3053	613	3100	102.19
chr1	27097561	27100945	3385	774	3100	133.52
chr1	27119811	27123251	3441	677	3100	112.79
chr1	27157206	27161079	3874	575	3100	100.26
chr1	27189635	27200281	10647	1010	3100	90.14
chr1	27200477	27201572	1096	20	56.42	5.78
chr1	27205138	27213316	8179	1452	3100	126.29
chr1	27225483	27226962	1480	28	77.11	8.19
chr1	27230083	27231700	1618	119	875.45	27.48
chr1	27243352	27245771	2420	176	1275.57	40.01
chr1	27255595	27259344	3750	187	1074.38	19.76
chr1	27350962	27355418	4457	349	2609.26	60.73
chr1	27431973	27435929	3957	377	3117.62	54.47
chr1	27497524	27499217	1694	31	75.31	6.75
chr1	27499393	27501368	1976	37	96.31	5.3
chr1	27505055	27507795	2741	117	610.2	23.62
chr1	27519988	27522979	2992	640	3100	129.66
chr1	27540029	27542777	2749	99	456.02	23.14
chr1	27547379	27551648	4270	792	3100	79.05
chr1	27555392	27557277	1886	68	319.42	18.32
chr1	27558193	27561217	3025	382	3100	55.43
chr1	27563711	27567116	3406	418	3100	67
chr1	27580936	27583256	2321	124	753.14	34.71
chr1	27589438	27593374	3937	544	3100	99.3
chr1	27628589	27629443	855	17	54.8	6.75
chr1	27686810	27690159	3350	624	3100	109.42
chr1	27695299	27696952	1654	96	619.36	31.33
chr1	27723806	27728962	5157	495	3100	58.32
chr1	27738583	27740045	1463	31	95.56	6.27
chr1	27754827	27757907	3081	118	558.52	23.62
chr1	27762426	27763918	1493	25	60.48	7.23
chr1	27766146	27776025	9880	548	3100	34.22
chr1	27791228	27793479	2252	66	260.41	12.53
chr1	27797641	27799372	1732	36	106.35	7.71
chr1	27800005	27807602	7598	567	3100	46.76
chr1	27812860	27815596	2737	309	2776.22	85.32
chr1	27832271	27834863	2593	197	1459.64	36.15
chr1	27842120	27843674	1555	33	100.98	11.57
chr1	27849157	27850836	1680	34	98.22	9.16
chr1	27857322	27860283	2962	182	1195.45	40.01
chr1	27861310	27862731	1422	25	64.33	7.71
chr1	27867605	27869258	1654	53	229.73	19.76
chr1	27870629	27872575	1947	138	990.91	33.74
chr1	27923612	27926899	3288	382	3100	78.09
chr1	27971000	27974107	3108	590	3100	92.55
chr1	28028685	28032492	3808	736	3100	116.17
chr1	28056985	28058224	1240	21	53.53	5.78
chr1	28070724	28073079	2356	452	3100	107.97
chr1	28112232	28114473	2242	498	3100	113.27
chr1	28133497	28138098	4602	516	3100	93.03
chr1	28157359	28161107	3749	469	3100	75.68
chr1	28157359	28161107	3749	469	3100	75.68
chr1	28285577	28288949	3373	846	3100	148.46
chr1	28303411	28305039	1629	98	645.79	33.74
chr1	28392013	28393457	1445	27	68.32	6.75
chr1	28430237	28432853	2617	576	3100	134
chr1	28434060	28437560	3501	797	3100	113.76
chr1	28444754	28449417	4664	322	2246.21	40.49
chr1	28457230	28461477	4248	619	3100	68.45
chr1	28494850	28497053	2204	95	502.8	24.1
chr1	28527029	28529863	2835	395	3100	68.45
chr1	28550491	28551775	1285	40	173.29	9.64
chr1	28567867	28570999	3133	544	3100	90.14
chr1	28572837	28573946	1110	19	50.25	5.3
chr1	28703898	28710545	6648	1095	3100	83.39
chr1	28703898	28710545	6648	1095	3100	83.39
chr1	28716144	28719347	3204	451	3100	102.19
chr1	28716144	28719347	3204	451	3100	102.19
chr1	28720130	28721618	1489	25	60.69	7.71
chr1	28720130	28721618	1489	25	60.69	7.71
chr1	28751016	28753689	2674	543	3100	128.22
chr1	28777702	28782620	4919	1241	3100	139.79
chr1	28777702	28782620	4919	1241	3100	139.79
chr1	28777702	28782620	4919	1241	3100	139.79
chr1	28777702	28782620	4919	1241	3100	139.79
chr1	28777702	28782620	4919	1241	3100	139.79
chr1	28790448	28792987	2540	195	1453.31	51.58
chr1	28840109	28843985	3877	848	3100	129.18
chr1	28846201	28848932	2732	197	1418.12	62.18
chr1	28866343	28869892	3550	506	3100	91.58
chr1	28933870	28939733	5864	868	3100	94.96
chr1	28942732	28944869	2138	40	102.89	6.27
chr1	28973288	28975130	1843	45	153.81	10.12
chr1	28983722	28985118	1397	60	323.94	17.83
chr1	29009929	29012827	2899	148	868.41	34.71
chr1	29075756	29076927	1172	22	62.84	6.27
chr1	29081972	29083399	1428	27	69.31	8.68
chr1	29083425	29088418	4994	590	3100	70.86
chr1	29112425	29115511	3087	454	3100	85.8
chr1	29318953	29325588	6636	889	3100	71.82
chr1	29318953	29325588	6636	889	3100	71.82
chr1	29362153	29366133	3981	141	632.5	15.91
chr1	29377757	29382274	4518	771	3100	117.61
chr1	29384970	29386651	1682	37	115.94	7.71
chr1	29428356	29431322	2967	488	3100	107.49
chr1	29434601	29440043	5443	701	3100	113.27
chr1	29447496	29449253	1758	39	122.52	8.19
chr1	29455540	29457408	1869	42	132.63	8.68
chr1	29457713	29460690	2978	322	2834.38	46.27
chr1	29470337	29471732	1396	39	153.99	7.71
chr1	29481007	29484047	3041	170	1054.62	35.19
chr1	29523127	29525711	2585	146	914.8	40.49
chr1	29676317	29678614	2298	107	595.5	26.03
chr1	29951543	29952748	1206	48	248.84	21.21
chr1	30217754	30220914	3161	91	346.58	13.01
chr1	30330730	30332374	1645	46	178.87	15.42
chr1	30587253	30589206	1954	67	302.46	18.8
chr1	30929738	30932413	2676	221	1709.27	41.45
chr1	30962343	30965464	3122	289	2361.96	70.86
chr1	31027475	31029166	1692	63	304.9	21.21
chr1	31046597	31048017	1421	41	165.83	13.01
chr1	31061059	31062852	1794	36	102.16	6.75
chr1	31068408	31071233	2826	234	1810.84	54.47
chr1	31089272	31091245	1974	44	137.02	8.19
chr1	31092281	31093468	1188	29	104.5	8.68
chr1	31098575	31100068	1494	24	50.66	7.23
chr1	31151548	31153907	2360	179	1327.28	39.04
chr1	31154124	31155846	1723	116	812.57	37.6
chr1	31276628	31278061	1434	23	53.54	5.78
chr1	31307085	31312127	5043	889	3100	110.86
chr1	31399313	31401719	2407	242	2064.16	43.38
chr1	31426183	31428582	2400	133	825.36	32.3
chr1	31460788	31462102	1315	22	54.64	5.3
chr1	31483318	31486724	3407	330	2754.61	63.14
chr1	31540055	31544331	4277	1252	3100	135.45
chr1	31540055	31544331	4277	1252	3100	135.45
chr1	31616913	31620272	3360	422	3100	68.45
chr1	31639467	31641143	1677	86	515.01	25.06
chr1	31657426	31661160	3735	600	3100	104.6
chr1	31786493	31788471	1979	313	3100	75.19
chr1	31813073	31815878	2806	161	1016.49	26.51
chr1	31816943	31819008	2066	50	167.62	12.05
chr1	31823990	31827818	3829	119	480.14	13.01
chr1	31854633	31857190	2558	190	1380.07	47.24
chr1	31881295	31884528	3234	945	3100	120.5
chr1	31907483	31909522	2040	55	203.49	12.05
chr1	31940762	31944555	3794	373	3132.88	54.47
chr1	31951772	31955107	3336	456	3100	82.43
chr1	31996736	32004088	7353	622	3100	43.86
chr1	32009183	32012229	3047	293	2440	60.73
chr1	32019755	32022053	2299	64	241.3	11.09
chr1	32025625	32027961	2337	464	3100	104.6
chr1	32052888	32054500	1613	110	777.4	40.01
chr1	32168880	32171162	2283	54	175.53	6.75
chr1	32172640	32176306	3667	429	3100	109.9
chr1	32176533	32178613	2081	61	242.03	19.76
chr1	32181669	32184086	2418	263	2326.37	53.02
chr1	32250520	32255664	5145	1121	3100	133.04
chr1	32300218	32301407	1190	20	51.08	6.27
chr1	32309699	32312622	2924	532	3100	99.3
chr1	32345006	32348375	3370	817	3100	135.45
chr1	32416104	32420626	4523	534	3100	70.37
chr1	32437054	32440691	3638	461	3100	70.37
chr1	32442169	32445228	3060	621	3100	114.24
chr1	32442169	32445228	3060	621	3100	114.24
chr1	32458508	32462681	4174	821	3100	125.32
chr1	32458508	32462681	4174	821	3100	125.32
chr1	32477002	32480831	3830	891	3100	98.81
chr1	32485580	32487264	1685	84	494.21	18.8
chr1	32510677	32515116	4440	676	3100	82.43
chr1	32529148	32531800	2653	445	3100	90.62
chr1	32570779	32575971	5193	473	3100	68.45
chr1	32570779	32575971	5193	473	3100	68.45
chr1	32588722	32591519	2798	229	1761.84	53.02
chr1	32599102	32601631	2530	148	947.55	27.96
chr1	32599102	32601631	2530	148	947.55	27.96
chr1	32630658	32634372	3715	910	3100	136.41
chr1	32664406	32666162	1757	42	141.51	13.01
chr1	32685272	32687085	1814	43	143.27	13.5
chr1	32701537	32704528	2992	645	3100	104.12
chr1	32737592	32740052	2461	215	1712.82	45.31
chr1	32758476	32759790	1315	24	65.16	5.78
chr1	32776279	32779714	3436	495	3100	102.19
chr1	32849341	32851482	2142	164	1224.31	51.09
chr1	32887189	32891885	4697	978	3100	123.88
chr1	32887189	32891885	4697	978	3100	123.88
chr1	32939299	32942521	3223	208	1403.5	37.12
chr1	32949944	32951537	1594	27	65.28	8.68
chr1	32954154	32955744	1591	74	417.79	26.99
chr1	32962557	32964172	1616	35	108.62	7.71
chr1	32974477	32976060	1584	49	207.36	13.5
chr1	32978218	32982498	4281	339	2550.62	52.06
chr1	32991391	32994738	3348	771	3100	187.99
chr1	32996547	33000462	3916	269	1875.13	31.33
chr1	33002680	33006272	3593	304	2371.64	40.49
chr1	33052919	33058102	5184	1209	3100	133.04
chr1	33052919	33058102	5184	1209	3100	133.04
chr1	33107439	33111248	3810	194	1129.49	33.74
chr1	33113421	33115458	2038	45	138.36	10.12
chr1	33119836	33121209	1374	27	78.21	9.64
chr1	33123433	33125581	2149	82	398.74	23.62
chr1	33130005	33133338	3334	248	1810.01	42.9
chr1	33130005	33133338	3334	248	1810.01	42.9
chr1	33137856	33140680	2825	246	1952.88	49.17
chr1	33162290	33165349	3060	173	1080.5	24.58
chr1	33200229	33204221	3993	343	2693.72	45.31
chr1	33210093	33211687	1595	195	1826.36	54.47
chr1	33218950	33220119	1170	21	57.47	5.78
chr1	33222138	33223307	1170	20	52.17	6.75
chr1	33273094	33275667	2574	493	3100	107.49
chr1	33318245	33321155	2911	404	3100	69.41
chr1	33356879	33359008	2130	100	561.09	22.17
chr1	33363591	33367562	3972	679	3100	132.07
chr1	33378005	33379708	1704	37	114.32	7.23
chr1	33390723	33392655	1933	40	115.98	11.09
chr1	33401690	33404134	2445	46	117.03	6.27
chr1	33417691	33421692	4002	495	3100	71.82
chr1	33493172	33497196	4025	312	2322.58	49.17
chr1	33543873	33546005	2133	74	335.36	16.39
chr1	33575976	33577769	1794	36	102.16	7.23
chr1	33579319	33581390	2072	69	303.5	13.01
chr1	33584692	33589690	4999	400	3021.79	71.34
chr1	33601166	33603252	2087	56	205.95	13.01
chr1	33666330	33670121	3792	226	1451.51	39.04
chr1	33708103	33712154	4052	281	1968.38	60.73
chr1	34257255	34258778	1524	31	91.32	7.23
chr1	34399837	34406745	6909	939	3100	55.91
chr1	34399837	34406745	6909	939	3100	55.91
chr1	34414017	34416453	2437	97	483.58	22.17
chr1	34425494	34427976	2483	91	418.47	19.28
chr1	34487979	34489142	1164	30	113.38	12.53
chr1	34504077	34505087	1011	19	56.1	6.75
chr1	34809942	34811264	1323	36	139.96	13.98
chr1	34921609	34923504	1896	36	95.69	7.71
chr1	35000937	35002469	1533	28	73.92	6.27
chr1	35018202	35021074	2873	335	3052.36	54.47
chr1	35029824	35032400	2577	136	817.39	27.48
chr1	35080443	35083558	3116	91	351.22	10.12
chr1	35095724	35099088	3365	693	3100	140.27
chr1	35102802	35105628	2827	214	1580.36	45.79
chr1	35121889	35125143	3255	337	2904.81	61.7
chr1	35156379	35158236	1858	35	92.52	8.68
chr1	35165724	35169590	3867	378	3165.6	75.68
chr1	35221768	35224413	2646	308	2806.35	58.32
chr1	35267968	35271330	3363	586	3100	117.61
chr1	35316715	35319495	2781	419	3100	96.4
chr1	35426989	35432527	5539	959	3100	108.94
chr1	35439856	35441101	1246	22	58.44	5.78
chr1	35447613	35449616	2004	39	105.6	7.71
chr1	35505391	35509183	3793	433	3100	81.46
chr1	35773206	35774086	881	17	53.05	6.27
chr1	35791398	35797842	6445	1246	3100	117.61
chr1	35791398	35797842	6445	1246	3100	117.61
chr1	35810007	35817334	7328	600	3100	57.36
chr1	35860046	35862080	2035	40	109.24	5.78
chr1	35874861	35876798	1938	39	109.86	7.23
chr1	35877192	35881258	4067	749	3100	122.43
chr1	35936937	35938518	1582	73	410.16	26.51
chr1	35939721	35941747	2027	51	177.52	8.19
chr1	35944522	35947864	3343	378	3100	53.99
chr1	35955057	35957868	2812	415	3100	61.22
chr1	36005925	36009246	3322	421	3100	79.05
chr1	36044859	36048767	3909	440	3100	81.46
chr1	36107410	36108427	1018	20	61.36	7.71
chr1	36120034	36126540	6507	829	3100	131.59
chr1	36167181	36171584	4404	841	3100	125.32
chr1	36246173	36247481	1309	22	54.96	7.71
chr1	36321270	36323625	2356	168	1205.32	33.26
chr1	36325496	36328910	3415	565	3100	107.01
chr1	36325496	36328910	3415	565	3100	107.01
chr1	36337614	36338879	1266	21	52.15	7.71
chr1	36362030	36364958	2929	175	1130.91	38.56
chr1	36385950	36390074	4125	630	3100	139.79
chr1	36392392	36396898	4507	540	3100	65.55
chr1	36398203	36401080	2878	269	2210.95	65.07
chr1	36413059	36415264	2206	75	334.03	19.76
chr1	36415390	36418522	3133	252	1918.5	47.24
chr1	36425654	36426925	1272	58	318.06	16.87
chr1	36461144	36464898	3755	963	3100	109.9
chr1	36543162	36546933	3772	492	3100	85.8
chr1	36543162	36546933	3772	492	3100	85.8
chr1	36557693	36563558	5866	930	3100	76.64
chr1	36557693	36563558	5866	930	3100	76.64
chr1	36611028	36612763	1736	33	88.98	6.27
chr1	36621824	36626270	4447	720	3100	100.74
chr1	36634265	36636982	2718	520	3100	126.77
chr1	36638393	36641049	2657	370	3100	58.32
chr1	36678098	36680985	2888	67	209.54	11.57
chr1	36687564	36690022	2459	341	3100	67.48
chr1	36700644	36704161	3518	829	3100	133.04
chr1	36828413	36830141	1729	99	632.71	32.3
chr1	37008261	37010687	2427	59	195.83	8.19
chr1	37061819	37063044	1226	21	54.3	4.82
chr1	37269939	37277500	7562	563	3100	42.9
chr1	37280669	37282481	1813	35	95.29	7.71
chr1	37472822	37474275	1454	24	52.56	6.27
chr1	37492805	37495151	2347	76	324.64	11.57
chr1	37552622	37554997	2376	69	269.2	12.05
chr1	37555566	37557532	1967	48	162.92	12.53
chr1	37600205	37602258	2054	47	149.49	9.16
chr1	37632644	37634573	1930	46	153.05	10.12
chr1	37685872	37688616	2745	74	267.94	11.09
chr1	37689846	37691558	1713	46	172.22	13.01
chr1	37708959	37717026	8068	655	3100	91.1
chr1	37751083	37754564	3482	471	3100	66.52
chr1	37790489	37793349	2861	588	3100	120.5
chr1	37794203	37796676	2474	240	1999.64	68.93
chr1	37831714	37834955	3242	703	3100	158.1
chr1	37871065	37874374	3310	146	774.58	19.76
chr1	37898222	37899742	1521	38	135.34	10.6
chr1	37926540	37932130	5591	1222	3100	102.19
chr1	37926540	37932130	5591	1222	3100	102.19
chr1	37972840	37974489	1650	210	1986.45	74.23
chr1	37989987	37993046	3060	193	1286.34	28.92
chr1	38001965	38005934	3970	407	3100	57.84
chr1	38030697	38034788	4092	262	1753.42	34.71
chr1	38044468	38048371	3904	627	3100	108.94
chr1	38044468	38048371	3904	627	3100	108.94
chr1	38044468	38048371	3904	627	3100	108.94
chr1	38096295	38099324	3030	805	3100	125.32
chr1	38096295	38099324	3030	805	3100	125.32
chr1	38168381	38171449	3069	447	3100	94.48
chr1	38183473	38185978	2506	336	3100	91.1
chr1	38226316	38229427	3112	548	3100	123.88
chr1	38232926	38235845	2920	240	1849.4	42.42
chr1	38236711	38240249	3539	87	284.26	9.64
chr1	38241628	38245157	3530	355	3016.05	75.68
chr1	38246858	38247924	1067	19	52.7	5.78
chr1	38249634	38252949	3316	669	3100	136.89
chr1	38266203	38269516	3314	103	418.12	13.98
chr1	38281015	38287466	6452	555	3100	59.29
chr1	38301724	38303400	1677	42	148.31	11.57
chr1	38377759	38380444	2686	71	252.89	10.12
chr1	38507605	38510117	2513	62	208.11	13.98
chr1	38529359	38531598	2240	104	578.23	26.99
chr1	38608557	38610311	1755	49	189.18	12.53
chr1	38662512	38663548	1037	30	125.94	11.09
chr1	38712365	38715814	3450	218	1441	29.4
chr1	38727067	38728954	1888	45	150.06	11.57
chr1	38795332	38799191	3860	310	2352.31	64.11
chr1	38815492	38818213	2722	187	1310.95	37.12
chr1	38845937	38847222	1286	26	78.28	8.19
chr1	38964700	38967513	2814	127	687.66	19.28
chr1	39041061	39043706	2646	149	931.38	27.48
chr1	39053510	39058226	4717	341	2440.22	57.36
chr1	39095547	39099940	4394	717	3100	144.61
chr1	39109558	39113223	3666	606	3100	94.48
chr1	39109558	39113223	3666	606	3100	94.48
chr1	39179242	39180544	1303	27	77.14	6.75
chr1	39223157	39225387	2231	63	240.99	15.42
chr1	39227748	39232872	5125	814	3100	127.73
chr1	39234755	39236616	1862	39	115	7.23
chr1	39239428	39240609	1182	21	56.77	5.78
chr1	39254148	39256218	2071	65	272.84	12.05
chr1	39263200	39266175	2976	744	3100	135.93
chr1	39318209	39321768	3560	251	1777.51	43.38
chr1	39340203	39347100	6898	948	3100	78.57
chr1	39369550	39372073	2524	94	445.72	17.35
chr1	39379057	39381947	2891	82	309.74	8.68
chr1	39395824	39399868	4045	490	3100	81.94
chr1	39421267	39422647	1381	22	51.28	4.82
chr1	39442245	39444336	2092	48	152.79	7.71
chr1	39458759	39460413	1655	45	170.82	9.16
chr1	39467459	39470021	2563	74	285.91	15.42
chr1	39505663	39509245	3583	186	1097.82	25.55
chr1	39629333	39631075	1743	29	67.57	6.75
chr1	39645188	39651326	6139	808	3100	87.25
chr1	39645188	39651326	6139	808	3100	87.25
chr1	39651791	39654990	3200	117	541.98	15.91
chr1	39651791	39654990	3200	117	541.98	15.91
chr1	39728050	39730249	2200	102	566.95	20.24
chr1	39796400	39799167	2768	296	2594.16	76.64
chr1	39796400	39799167	2768	296	2594.16	76.64
chr1	39810286	39816051	5766	646	3100	78.09
chr1	39843999	39844849	851	17	55.07	7.71
chr1	39846866	39849340	2475	236	1962.22	67.96
chr1	39870136	39872349	2214	65	257.14	15.42
chr1	39876651	39878941	2291	178	1337.35	41.45
chr1	39908676	39911385	2710	206	1525.66	25.55
chr1	39921088	39923021	1934	49	172.37	14.46
chr1	39928472	39931867	3396	274	2087.22	35.19
chr1	39938729	39941033	2305	144	960.14	24.58
chr1	39976117	39978915	2799	426	3100	109.42
chr1	40007900	40008990	1091	23	68.12	10.6
chr1	40007900	40008990	1091	23	68.12	10.6
chr1	40026409	40028257	1849	81	436.68	16.87
chr1	40115444	40117218	1775	35	97.71	6.27
chr1	40119522	40122671	3150	588	3100	110.38
chr1	40129833	40132689	2857	91	379.63	17.35
chr1	40135332	40141908	6577	700	3100	55.43
chr1	40159500	40161655	2156	87	440.26	17.35
chr1	40192260	40195087	2828	391	3100	74.71
chr1	40276721	40281358	4638	1145	3100	132.07
chr1	40296932	40298654	1723	33	89.78	8.19
chr1	40333639	40336426	2788	543	3100	119.54
chr1	40381506	40382934	1429	29	86.1	7.71
chr1	40398369	40402154	3786	767	3100	97.85
chr1	40494037	40498026	3990	1097	3100	147.98
chr1	40541170	40543046	1877	41	125.9	8.68
chr1	40552297	40556467	4171	514	3100	46.76
chr1	40610637	40614010	3374	453	3100	86.76
chr1	40620664	40622126	1463	26	67.29	7.71
chr1	40686820	40690700	3881	661	3100	101.22
chr1	40714216	40717379	3164	414	3100	81.46
chr1	40745878	40748805	2928	597	3100	107.01
chr1	40768243	40771842	3600	776	3100	124.84
chr1	40891369	40893785	2417	213	1704.69	65.07
chr1	40900789	40905417	4629	281	1819.41	51.09
chr1	40906654	40907934	1281	35	137.02	14.94
chr1	40928008	40932009	4002	909	3100	107.49
chr1	40928008	40932009	4002	909	3100	107.49
chr1	40946122	40950996	4875	733	3100	99.78
chr1	41019740	41022215	2476	297	2744.12	65.07
chr1	41022281	41024022	1742	93	569.93	28.44
chr1	41039515	41041993	2479	109	582.22	24.1
chr1	41055204	41058558	3355	333	2812.82	53.02
chr1	41062539	41064471	1933	39	110.19	8.68
chr1	41075529	41077517	1989	43	129.83	10.12
chr1	41098432	41101613	3182	147	805.82	32.3
chr1	41121426	41123411	1986	102	607.55	28.44
chr1	41186114	41187452	1339	52	254.69	19.76
chr1	41216427	41220998	4572	688	3100	88.69
chr1	41478192	41482277	4086	410	3100	69.89
chr1	41568637	41570431	1795	40	125.89	10.12
chr1	41595560	41602137	6578	377	2347.26	38.56
chr1	41603042	41606372	3331	196	1252.01	36.15
chr1	41608799	41611575	2777	116	595.6	23.14
chr1	41618386	41623091	4706	367	2736.47	42.42
chr1	41625337	41626520	1184	21	56.66	6.27
chr1	41631930	41634582	2653	133	773.17	25.06
chr1	41637070	41638414	1345	24	63.41	6.75
chr1	41642276	41643706	1431	44	186.95	13.5
chr1	41645658	41646956	1299	21	50.45	5.3
chr1	41673257	41674930	1674	29	71.22	5.78
chr1	41723857	41726276	2420	77	316.16	12.05
chr1	41733237	41735828	2592	115	617.11	27.96
[truncated: 37,557 more rows]

## Sheet: KB_H3K27Me3
Chr	Start	End	Length	Tags	Pval(-10*LOG10)	Fold enrichment
[truncated: 18,734 more rows]

[truncated: 14 more sheets: Roadmap_H3K4Me3, Roadmap_H3K27Me3, MSC_H3K4Me3-Peaks1, MSC_H3K4Me3-Peaks2, MSC_H3K27Me3-Peaks1, MSC_H3K27Me3-Peaks2, Osteo_H3K4Me3-Peaks1, Osteo_H3K4Me3-Peaks2, Osteo_H3K27Me3-Peaks1, Osteo_H3K27Me3-Peaks2, U2OS_H3K4Me3-Peaks1, U2OS_H3K4Me3-Peaks2, U2OS_H3K27Me3-Peaks1, U2OS_H3K27Me3-Peaks2]
