# Supplementary material for: A DNA hypermethylation module for the stem/progenitor cell signature of cancer
Source: HighWire-hosted journal article supplement (doi:10.1101/gr.131169.111), 2012-03-05
Supplement: Table_S7.xlsx [file Table_S7.xlsx]

## Sheet: H3K4Me3 genes
ESC H3K4Me3 genes	MSC H3K4Me3 genes	Osteoblast H3K4Me3 genes	U2OS H3K4Me3 genes	HSC H3K4Me3 genes	CD36 H3K4Me3 genes
ABCB10	ABCB10	ABCB10	ABCB10	ABCB10	ABCB10
ABCD3	ABCD3	ABCD3	ABCD3	ABCD3	ABCD3
ABHD7	ABL2	ABHD7	ABL2	ABHD7	ABHD7
ABL2	AC000032.7	ABL2	AC092265.3	ABL2	ABL2
AC000032.7	AC093423.2	AC092809.2	AC092803.2	AC000032.7	AC092809.2
AC092809.2	AC098484.2	AC092811.2	AC092809.2	AC092809.2	AC093423.2
AC093154.2	AC099676.2	AC093423.2	AC093423.2	AC093423.2	AC098484.2
AC093423.2	AC103591.3	AC098484.2	AC097059.2	AC096533.3	AC098691.2
AC096533.3	AC104333.2	AC099676.2	AC097065.2	AC098484.2	AC099676.2
AC096645.2	AC104453.2	AC104333.2	AC098935.2	AC098691.2	AC103591.3
AC097065.2	AC138393.2	AC104453.2	AC098936.2	AC099676.2	AC104333.2
AC098484.2	ACADM	ACBD3	AC099676.2	AC103591.3	ACADM
AC098936.2	ACBD3	ACBD6	AC104333.2	AC104333.2	ACBD3
AC099676.2	ACBD6	ACOT7	AC104336.2	AC104336.2	ACBD6
AC103591.3	ACOT7	ACP6	AC104453.2	AC104453.2	ACOT7
AC104333.2	ACP6	ADAMTS4	AC114490.2	AC114491.1	ACP6
AC104336.2	ADAM15	ADAMTSL4	AC118556.2	AC115286.3	ADAM15
AC104453.2	ADAMTS4	ADAR	AC138393.2	ACADM	ADAMTS4
AC115286.3	ADAR	ADIPOR1	ACADM	ACBD3	ADAMTSL4
AC138392.2	ADC	ADPRHL2	ACBD3	ACBD6	ADAR
ACADM	ADIPOR1	ADSS	ACBD6	ACOT7	ADC
ACBD3	ADPRHL2	AGL	ACOT11	ACP6	ADIPOR1
ACBD6	ADSS	AGTRAP	ACOT7	ACTA1	ADPRHL2
ACOT11	AGL	AHCTF1	ACP6	ACTN2	ADSS
ACOT7	AGTRAP	AHCYL1	ACTN2	ACTRT2	AGL
ACP6	AHCTF1	AHDC1	ADAM15	ADAM15	AGMAT
ACTA1	AHCYL1	AK2	ADAMTS4	ADAMTS4	AGRN
ACTN2	AHDC1	AK5	ADAMTSL4	ADAMTSL4	AGTRAP
ADAM15	AK2	AKR1A1	ADAR	ADAR	AHCTF1
ADAMTS4	AK3L1	AKR7A2	ADC	ADC	AHCYL1
ADAMTSL4	AK5	AKT3	ADIPOR1	ADIPOR1	AHDC1
ADAR	AKR1A1	AL031281.6	ADORA1	ADORA1	AK2
ADC	AKR7A2	AL031289.1	ADORA3	ADORA2BP	AK3L1
ADIPOR1	AKR7A3	AL033527.26	ADPRHL2	ADPRHL2	AK5
ADORA1	AKT3	AL033528.20	ADSS	ADSS	AKR1A1
ADORA2BP	AL009181.1	AL049576.19	AGBL4	AGBL4	AKR7A2
ADORA3	AL020997.1	AL049762.20	AGL	AGL	AKT3
ADPRHL2	AL021155.1	AL049796.28	AGRN	AGMAT	AL020997.1
ADSS	AL031281.6	AL050343.17	AGTRAP	AGRN	AL021154.1
AGBL4	AL031289.1	AL080251.23	AHCTF1	AGTRAP	AL021155.1
AGL	AL033527.26	AL096840.25	AHCYL1	AHCTF1	AL021579.1
AGMAT	AL033528.20	AL109936.11	AHDC1	AHCYL1	AL031281.6
AGRN	AL035209.1	AL117349.22	AK2	AHDC1	AL031289.1
AGTRAP	AL049576.19	AL121991.50	AK3L1	AJAP1	AL033527.26
AHCTF1	AL049762.20	AL121992.24	AKR1A1	AK2	AL033528.20
AHCYL1	AL049796.28	AL122001.32	AKR7A2	AK3L1	AL049576.19
AHDC1	AL080251.23	AL122004.17	AKT3	AK5	AL049762.20
AJAP1	AL096840.25	AL135927.14	AL008733.10	AKR1A1	AL049796.28
AK2	AL109936.11	AL136376.10	AL009181.1	AKR7A2	AL050343.17
AK3L1	AL117349.22	AL136378.14	AL020997.1	AKR7A3	AL080251.23
AK5	AL121991.50	AL137157.7	AL021154.1	AKT3	AL096840.25
AKR1A1	AL121992.24	AL137798.8	AL021155.1	AL008733.10	AL109936.11
AKR7A2	AL122001.32	AL138795.21	AL021579.1	AL009181.1	AL117349.22
AKR7A3	AL122004.17	AL139132.16	AL022145.1	AL020997.1	AL121990.34
AKT3	AL135927.14	AL139136.17	AL022398.1	AL021155.1	AL121991.50
AL008733.10	AL136376.10	AL139415.10	AL031281.6	AL031281.6	AL121992.24
AL009181.1	AL136378.14	AL160008.3	AL031289.1	AL031282.1	AL122001.32
AL020997.1	AL137157.7	AL162430.15	AL033527.26	AL031289.1	AL122004.17
AL021155.1	AL137798.8	AL162595.17	AL033528.20	AL033527.26	AL135927.14
AL021579.1	AL138795.21	AL162734.15	AL035403.10	AL033528.20	AL136376.10
AL021920.1	AL139132.16	AL355149.13	AL035405.13	AL035405.13	AL136378.14
AL022240.8	AL139138.17	AL355860.12	AL035414.30	AL035413.19	AL137798.8
AL031281.6	AL139287.24	AL356055.13	AL049576.19	AL049576.19	AL137802.7
AL031282.1	AL160008.3	AL356356.17	AL049762.20	AL049762.20	AL137857.29
AL031289.1	AL162430.15	AL356378.17	AL049796.28	AL049796.28	AL138795.21
AL031602.14	AL162595.17	AL356390.24	AL050343.17	AL050343.17	AL139136.17
AL033527.26	AL355149.13	AL356441.16	AL080251.23	AL080251.23	AL139139.9
AL033528.20	AL356378.17	AL356512.19	AL096840.25	AL096840.25	AL139287.24
AL033529.25	AL356390.24	AL356693.37	AL109936.11	AL109936.11	AL139288.15
AL035403.10	AL356512.19	AL356957.27	AL117349.22	AL117349.22	AL139415.10
AL035405.13	AL356957.27	AL357140.33	AL121988.10	AL121988.10	AL157904.24
AL035408.5	AL357140.33	AL357673.12	AL121991.50	AL121991.50	AL158837.14
AL049576.19	AL357673.12	AL359551.13	AL121992.24	AL121992.24	AL162430.15
AL049762.20	AL359075.15	AL359742.15	AL122001.32	AL122001.32	AL162595.17
AL049796.28	AL359551.13	AL359853.18	AL122004.17	AL122004.17	AL162734.15
AL050343.17	AL359742.15	AL365436.26	AL133286.9	AL135927.14	AL355149.13
AL080251.23	AL359758.15	AL390195.10	AL135927.14	AL136376.10	AL356292.21
AL096840.25	AL359771.27	AL390728.37	AL136376.10	AL136378.14	AL356378.17
AL109936.11	AL359853.18	AL391244.11	AL136378.14	AL137798.8	AL356390.24
AL109948.9	AL365436.26	AL445183.19	AL137157.7	AL137802.7	AL356441.16
AL117349.22	AL390195.10	AL445435.11	AL137798.8	AL137857.29	AL356512.19
AL121988.10	AL390719.47	AL445490.6	AL137802.7	AL138795.21	AL356583.28
AL121991.50	AL390728.37	AL450998.19	AL137857.29	AL139130.28	AL356748.20
AL121992.24	AL391244.11	AL451043.14	AL138795.21	AL139136.17	AL356957.27
AL122001.32	AL445183.19	AL451054.22	AL139128.24	AL139138.17	AL357140.33
AL122004.17	AL445435.11	AL451074.13	AL139130.28	AL139139.9	AL357493.8
AL135927.14	AL445490.6	AL513497.21	AL139132.16	AL139287.24	AL357673.12
AL136373.21	AL445673.9	AL513523.33	AL139136.17	AL139288.15	AL358472.54
AL136376.10	AL450998.19	AL590434.16	AL139139.9	AL139346.6	AL359075.15
AL136378.14	AL451043.14	AL590609.15	AL139287.24	AL139415.10	AL359742.15
AL137798.8	AL451054.22	AL590666.8	AL139343.9	AL157904.24	AL359758.15
AL137802.7	AL451074.13	AL591602.7	AL139415.10	AL158837.14	AL359771.27
AL137857.29	AL513477.21	AL591845.27	AL157904.24	AL160004.18	AL359853.18
AL138795.21	AL513497.21	AL592166.16	AL158837.14	AL160008.3	AL365436.26
AL139130.28	AL513523.33	AL592205.4	AL160004.18	AL162430.15	AL390195.10
AL139136.17	AL590434.16	AL592207.9	AL160008.3	AL162595.17	AL390719.47
AL139138.17	AL590666.8	AL592295.25	AL161734.12	AL162734.15	AL390728.37
AL139139.9	AL591845.27	AL596177.4	AL161742.7	AL354743.33	AL391244.11
AL139287.24	AL592166.16	AL596220.9	AL162430.15	AL355149.13	AL445183.19
AL139288.15	AL592207.9	AL603790.41	AL162595.17	AL356292.21	AL445435.11
AL139346.6	AL592284.10	AL663123.1	AL162734.15	AL356378.17	AL445490.6
AL139415.10	AL592307.36	AL713899.14	AL354743.33	AL356390.24	AL445673.9
AL157904.24	AL592436.7	AL713999.28	AL355149.13	AL356441.16	AL450992.17
AL160004.18	AL592494.2	AL732292.12	AL355860.12	AL356512.19	AL450998.19
AL162430.15	AL596177.4	AL808030.1	AL356292.21	AL356748.20	AL451043.14
AL162595.17	AL596220.9	ALDH4A1	AL356356.17	AL356953.17	AL451054.22
AL162734.15	AL603790.41	ALDH9A1	AL356378.17	AL356957.27	AL451074.13
AL354743.33	AL663102.4	ALG14	AL356390.24	AL357140.33	AL513477.21
AL355149.13	AL663123.1	ALG6	AL356441.16	AL357673.12	AL513497.21
AL356004.9	AL691432.53	ALPL	AL356512.19	AL359075.15	AL513523.33
AL356055.13	AL713999.28	AMIGO1	AL356748.20	AL359742.15	AL590434.16
AL356104.6	AL732292.12	AMPD2	AL356953.17	AL359771.27	AL590560.9
AL356273.14	AL831784.17	ANKRD13C	AL356957.27	AL359853.18	AL590666.8
AL356292.21	ALDH4A1	ANKRD34A	AL357140.33	AL365436.26	AL591845.27
AL356356.17	ALDH9A1	ANKRD35	AL357493.8	AL390195.10	AL592166.16
AL356378.17	ALG14	ANP32E	AL357673.12	AL390719.47	AL592207.9
AL356390.24	ALG6	AOF2	AL358472.54	AL390728.37	AL592284.10
AL356441.16	ALPL	AP4B1	AL358813.13	AL391244.11	AL592295.25
AL356512.19	AMIGO1	APH1A	AL358876.11	AL445183.19	AL592307.36
AL356748.20	AMPD2	APOA1BP	AL359551.13	AL445435.11	AL592494.2
AL356953.17	ANGEL2	APOA2	AL359742.15	AL445490.6	AL596177.4
AL356957.27	ANKRD13C	AQP10	AL359758.15	AL445673.9	AL596220.9
AL357078.35	ANKRD34A	ARF1	AL359771.27	AL449143.18	AL603790.41
AL357140.33	ANKRD35	ARHGAP29	AL359839.4	AL450992.17	AL603832.28
AL357493.8	ANP32E	ARHGEF10L	AL359853.18	AL450998.19	AL663123.1
AL357673.12	AOF2	ARHGEF11	AL365436.26	AL451043.14	AL691432.53
AL357835.11	AP4B1	ARHGEF19	AL390195.10	AL451054.22	AL713899.14
AL358175.18	APH1A	ARHGEF2	AL390719.47	AL451074.13	AL713999.28
AL358813.13	APOA1BP	ARID1A	AL390728.37	AL513497.21	AL732292.12
AL359075.15	APOA2	ARID4B	AL391001.12	AL513523.33	AL831784.17
AL359540.19	AQP10	ARL8A	AL391244.11	AL590434.16	ALDH4A1
AL359742.15	ARF1	ARNT	AL391561.20	AL590560.9	ALDH9A1
AL359758.15	ARHGAP29	ARPC5	AL445183.19	AL590666.8	ALG14
AL359771.27	ARHGEF10L	ARV1	AL445248.7	AL591845.27	ALG6
AL359853.18	ARHGEF11	ASH1L	AL445435.11	AL592166.16	AMIGO1
AL365436.26	ARHGEF19	ASPM	AL445490.6	AL592207.9	AMPD2
AL390195.10	ARHGEF2	ATAD3B	AL445650.9	AL592284.10	ANGEL2
AL390719.47	ARID1A	ATF3	AL445673.9	AL592295.25	ANKRD13C
AL390728.37	ARID4B	ATF6	AL450998.19	AL592307.36	ANKRD34A
AL390877.1	ARL8A	ATG4C	AL451043.14	AL592309.24	ANKRD35
AL391001.12	ARNT	ATP13A2	AL451054.22	AL592464.24	ANP32E
AL391244.11	ARPC5	ATP1A1	AL451067.12	AL592494.2	ANXA9
AL445183.19	ARV1	ATP1B1	AL451074.13	AL596087.11	AOF2
AL445248.7	ASH1L	ATP2B4	AL451139.40	AL596177.4	AP4B1
AL445435.11	ASPM	ATP5F1	AL513477.21	AL596220.9	APH1A
AL445490.6	ATAD3A	ATP6V0B	AL513497.21	AL603790.41	APOA1BP
AL445650.9	ATAD3B	ATP8B2	AL513523.33	AL603832.28	APOA2
AL445673.9	ATF3	ATPAF1	AL513526.19	AL663123.1	AQP10
AL445687.5	ATF6	ATPBD1B	AL583842.40	AL691432.53	ARF1
AL450992.17	ATG4C	ATPIF1	AL590434.16	AL713899.14	ARHGAP29
AL450998.19	ATP13A2	ATXN7L2	AL590560.9	AL713999.28	ARHGAP30
AL451043.14	ATP1A1	B3GALNT2	AL590644.14	AL732292.12	ARHGEF11
AL451054.22	ATP1B1	B3GALT2	AL590666.8	AL732363.8	ARHGEF19
AL451058.16	ATP2B4	B3GALT6	AL592166.16	AL831784.17	ARHGEF2
AL451067.12	ATP5F1	B4GALT2	AL592207.9	ALDH4A1	ARID1A
AL451074.13	ATP6V0B	B4GALT3	AL592284.10	ALDH9A1	ARID4B
AL513477.21	ATP8B2	BAT2D1	AL592295.25	ALG14	ARL8A
AL513497.21	ATPAF1	BCAR3	AL592307.36	ALG6	ARNT
AL513523.33	ATPBD1B	BCAS2	AL596220.9	ALPL	ARPC5
AL513526.19	ATPIF1	BCL10	AL603790.41	ALX3	ARTN
AL590434.16	ATXN7L2	BCL9	AL603832.28	AMIGO1	ARV1
AL590560.9	AURKAIP1	BLZF1	AL603840.9	AMPD2	ASCL5
AL590609.15	B3GALNT2	BOLA1	AL611946.14	ANGEL2	ASH1L
AL590666.8	B3GALT6	BPNT1	AL663102.4	ANKRD13C	ASPM
AL590667.7	B4GALT2	BRP44	AL663123.1	ANKRD34A	ATAD3A
AL590822.36	B4GALT3	BSDC1	AL669831.13	ANKRD35	ATAD3B
AL591845.27	BAT2D1	BTBD8	AL691432.53	ANKRD45	ATF3
AL592166.16	BCAR3	BTF3L4	AL713965.10	ANP32E	ATF6
AL592207.9	BCAS2	BTG2	AL713999.28	AOF2	ATG4C
AL592284.10	BCL10	BX004987.9	AL732292.12	AP4B1	ATP13A2
AL592295.25	BCL9	BXDC5	AL732414.17	APH1A	ATP1A1
AL592307.36	BLZF1	C1orf101	AL831784.17	APOA1BP	ATP1B1
AL592309.24	BOLA1	C1orf102	AL928921.21	APOA2	ATP2B4
AL592464.24	BPNT1	C1orf103	ALDH4A1	AQP10	ATP5F1
AL592492.10	BRP44	C1orf107	ALDH9A1	ARF1	ATP6V0B
AL592494.2	BSDC1	C1orf108	ALG14	ARHGAP29	ATP8B2
AL596177.4	BTBD8	C1orf109	ALG6	ARHGAP30	ATPAF1
AL596220.9	BTF3L4	C1orf110	ALPL	ARHGEF10L	ATPBD1B
AL603790.41	BTG2	C1orf112	AMIGO1	ARHGEF11	ATPIF1
AL603832.28	BXDC5	C1orf113	AMPD2	ARHGEF16	ATXN7L2
AL606491.19	C1orf101	C1orf114	ANGEL2	ARHGEF19	AURKAIP1
AL606537.10	C1orf102	C1orf119	ANKRD13C	ARHGEF2	B3GALNT2
AL627309.15	C1orf103	C1orf122	ANKRD34A	ARID1A	B3GALT6
AL645859.10	C1orf107	C1orf123	ANKRD35	ARID4B	B4GALT2
AL663102.4	C1orf108	C1orf124	ANP32E	ARL8A	B4GALT3
AL663123.1	C1orf109	C1orf125	AOF2	ARNT	BAT2D1
AL669831.13	C1orf110	C1orf126	AP4B1	ARPC5	BCAR3
AL672183.3	C1orf112	C1orf127	APH1A	ARTN	BCAS2
AL691432.53	C1orf113	C1orf128	APOA1BP	ARV1	BCL10
AL713899.14	C1orf114	C1orf131	APOA2	ASCL5	BCL9
AL713999.28	C1orf119	C1orf132	AQP10	ASH1L	BEST4
AL732292.12	C1orf120	C1orf135	ARF1	ASPM	BLZF1
AL831784.17	C1orf122	C1orf137	ARHGAP29	ATAD3A	BMP8A
AL954711.3	C1orf123	C1orf142	ARHGAP30	ATAD3B	BMP8B
ALDH4A1	C1orf124	C1orf144	ARHGEF10L	ATF3	BOLA1
ALDH9A1	C1orf126	C1orf149	ARHGEF11	ATF6	BPNT1
ALG14	C1orf128	C1orf151	ARHGEF16	ATG4C	BRP44
ALG6	C1orf131	C1orf156	ARHGEF19	ATP13A2	BSDC1
ALPL	C1orf132	C1orf160	ARHGEF2	ATP1A1	BTBD8
ALX3	C1orf135	C1orf163	ARID1A	ATP1B1	BTF3L4
AMIGO1	C1orf142	C1orf166	ARID4B	ATP2B4	BTG2
AMPD2	C1orf144	C1orf173	ARL8A	ATP5F1	BX284650.8
ANGEL2	C1orf148	C1orf174	ARNT	ATP6V0B	BX323046.3
ANKRD13C	C1orf149	C1orf176	ARPC5	ATP8B2	BX571818.3
ANKRD34A	C1orf151	C1orf181	ARV1	ATPAF1	BXDC5
ANKRD35	C1orf156	C1orf182	ASH1L	ATPBD1B	C1orf101
ANKRD45	C1orf159	C1orf19	ASPM	ATPIF1	C1orf102
ANP32E	C1orf160	C1orf190	ASTN1	ATXN7L2	C1orf103
ANXA9	C1orf163	C1orf196	ATAD3A	AURKAIP1	C1orf105
AOF2	C1orf166	C1orf198	ATAD3B	AVPR1B	C1orf106
AP4B1	C1orf173	C1orf2	ATF3	B3GALNT2	C1orf107
APH1A	C1orf174	C1orf201	ATF6	B3GALT6	C1orf108
APOA1BP	C1orf176	C1orf21	ATG4C	B4GALT2	C1orf109
APOA2	C1orf181	C1orf212	ATP13A2	B4GALT3	C1orf112
AQP10	C1orf182	C1orf213	ATP1A1	BAI2	C1orf113
ARF1	C1orf183	C1orf216	ATP1B1	BARHL2	C1orf114
ARHGAP29	C1orf19	C1orf220	ATP2B4	BAT2D1	C1orf115
ARHGEF10L	C1orf190	C1orf223	ATP5F1	BCAN	C1orf119
ARHGEF11	C1orf194	C1orf25	ATP6V0B	BCAR3	C1orf122
ARHGEF16	C1orf198	C1orf26	ATP6V1G3	BCAS2	C1orf123
ARHGEF19	C1orf2	C1orf27	ATP8B2	BCL10	C1orf124
ARHGEF2	C1orf201	C1orf31	ATPAF1	BCL9	C1orf125
ARID1A	C1orf21	C1orf34	ATPBD1B	BEST4	C1orf126
ARID4B	C1orf212	C1orf41	ATPIF1	BLZF1	C1orf128
ARL8A	C1orf213	C1orf43	ATXN7L2	BMP8A	C1orf131
ARNT	C1orf216	C1orf50	AURKAIP1	BMP8B	C1orf132
ARPC5	C1orf220	C1orf51	AVPR1B	BOLA1	C1orf135
ARTN	C1orf223	C1orf52	B3GALNT2	BPNT1	C1orf138
ARV1	C1orf25	C1orf53	B3GALT6	BRP44	C1orf14
ASCL5	C1orf26	C1orf54	B4GALT2	BSDC1	C1orf142
ASH1L	C1orf27	C1orf55	B4GALT3	BSND	C1orf144
ASPM	C1orf31	C1orf57	BAI2	BTBD8	C1orf145
ASTN1	C1orf35	C1orf58	BAT2D1	BTF3L4	C1orf148
ATAD3A	C1orf41	C1orf63	BCAR3	BTG2	C1orf149
ATAD3B	C1orf43	C1orf66	BCAS2	BX284650.8	C1orf150
ATF3	C1orf50	C1orf71	BCL10	BX323046.3	C1orf151
ATF6	C1orf51	C1orf74	BCL9	BXDC5	C1orf156
ATG4C	C1orf52	C1orf77	BLZF1	C1orf101	C1orf159
ATP13A2	C1orf53	C1orf79	BOLA1	C1orf102	C1orf160
ATP1A1	C1orf54	C1orf80	BPNT1	C1orf103	C1orf163
ATP1A2	C1orf55	C1orf83	BRP44	C1orf106	C1orf166
ATP1B1	C1orf56	C1orf85	BSDC1	C1orf107	C1orf174
ATP2B4	C1orf57	C1orf86	BTBD8	C1orf108	C1orf176
ATP5F1	C1orf58	C1orf88	BTF3L4	C1orf109	C1orf181
ATP6V0B	C1orf63	C1orf9	BTG2	C1orf112	C1orf182
ATP8B2	C1orf66	C1orf91	BX284650.8	C1orf113	C1orf183
ATPAF1	C1orf69	C1orf93	BX284668.4	C1orf114	C1orf19
ATPBD1B	C1orf71	C1orf96	BX323046.3	C1orf115	C1orf190
ATPIF1	C1orf74	C1orf97	BX537114.2	C1orf119	C1orf198
ATXN7L2	C1orf77	C1orf98	BXDC5	C1orf122	C1orf2
AURKAIP1	C1orf79	CABC1	C1orf101	C1orf123	C1orf201
AVPR1B	C1orf80	CACHD1	C1orf102	C1orf124	C1orf204
B3GALNT2	C1orf83	CACYBP	C1orf106	C1orf125	C1orf21
B3GALT6	C1orf85	CAMK2N1	C1orf107	C1orf126	C1orf212
B4GALT2	C1orf86	CAMSAP1L1	C1orf108	C1orf128	C1orf213
B4GALT3	C1orf88	CAP1	C1orf109	C1orf130	C1orf216
BAI2	C1orf89	CAPN2	C1orf112	C1orf131	C1orf220
BARHL2	C1orf9	CAPZA1	C1orf114	C1orf132	C1orf223
BAT2D1	C1orf90	CAPZB	C1orf119	C1orf133	C1orf25
BCAN	C1orf91	CASP9	C1orf122	C1orf135	C1orf26
BCAR3	C1orf93	CC2D1B	C1orf123	C1orf138	C1orf27
BCAS2	C1orf96	CCBL2	C1orf124	C1orf14	C1orf31
BCL10	C1orf97	CCDC18	C1orf125	C1orf142	C1orf32
BCL9	CACHD1	CCDC21	C1orf126	C1orf144	C1orf34
BEST4	CACYBP	CCDC23	C1orf128	C1orf145	C1orf35
BLZF1	CAMSAP1L1	CCDC28B	C1orf131	C1orf148	C1orf38
BMP8A	CAMTA1	CCDC76	C1orf132	C1orf149	C1orf41
BOLA1	CAP1	CCT3	C1orf133	C1orf150	C1orf43
BPNT1	CAPN2	CD55	C1orf135	C1orf151	C1orf50
BRP44	CAPZA1	CDC14A	C1orf138	C1orf156	C1orf51
BSDC1	CAPZB	CDC42	C1orf142	C1orf159	C1orf52
BSND	CASP9	CDC42BPA	C1orf144	C1orf160	C1orf53
BTBD8	CC2D1B	CDC42SE1	C1orf145	C1orf162	C1orf54
BTF3L4	CCBL2	CDC7	C1orf147	C1orf163	C1orf55
BTG2	CCDC18	CDC73	C1orf148	C1orf165	C1orf56
BX248398.9	CCDC21	CDCA8	C1orf149	C1orf166	C1orf57
BX284650.8	CCDC23	CDCP2	C1orf151	C1orf170	C1orf58
BX284668.4	CCDC24	CDKN2C	C1orf156	C1orf172	C1orf59
BX323014.4	CCDC28B	CENPF	C1orf159	C1orf173	C1orf63
BX323046.3	CCDC76	CENPL	C1orf160	C1orf174	C1orf66
BX537114.2	CCT3	CEP170	C1orf161	C1orf176	C1orf67
BX537254.7	CD46	CEP350	C1orf163	C1orf177	C1orf69
BX546486.21	CD55	CEPT1	C1orf165	C1orf181	C1orf71
BXDC5	CD58	CFH	C1orf166	C1orf182	C1orf74
C1orf101	CDC14A	CHD1L	C1orf174	C1orf183	C1orf77
C1orf102	CDC20	CKS1B	C1orf176	C1orf187	C1orf79
C1orf103	CDC2L2	CLCC1	C1orf181	C1orf19	C1orf80
C1orf106	CDC42	CLCN6	C1orf182	C1orf190	C1orf83
C1orf107	CDC42BPA	CLIC4	C1orf183	C1orf194	C1orf85
C1orf108	CDC42SE1	CLK2	C1orf187	C1orf196	C1orf86
C1orf109	CDC7	CLSTN1	C1orf19	C1orf198	C1orf88
C1orf112	CDC73	CMPK1	C1orf190	C1orf2	C1orf89
C1orf113	CDCA8	CNIH4	C1orf194	C1orf200	C1orf9
C1orf114	CDCP2	CNN3	C1orf198	C1orf201	C1orf91
C1orf115	CDKN2C	COG2	C1orf2	C1orf204	C1orf93
C1orf119	CENPF	COL11A1	C1orf201	C1orf21	C1orf96
C1orf122	CENPL	COL16A1	C1orf204	C1orf212	C1orf97
C1orf123	CENTB5	COPA	C1orf21	C1orf213	CABC1
C1orf124	CEP170	CORT	C1orf212	C1orf216	CACHD1
C1orf125	CEP350	CPT2	C1orf213	C1orf220	CACNA1S
C1orf126	CEPT1	CR628411.1	C1orf216	C1orf223	CACYBP
C1orf128	CHD1L	CREB3L4	C1orf220	C1orf25	CADM3
C1orf130	CHI3L1	CREG1	C1orf223	C1orf26	CALML6
C1orf131	CHML	CROCCL1	C1orf25	C1orf27	CAMSAP1L1
C1orf132	CKS1B	CRTC2	C1orf26	C1orf31	CAMTA1
C1orf133	CLCC1	CRYZ	C1orf27	C1orf32	CAP1
C1orf134	CLCN6	CSDE1	C1orf31	C1orf34	CAPN2
C1orf135	CLIC4	CSF1	C1orf32	C1orf35	CAPZA1
C1orf138	CLK2	CSRP1	C1orf34	C1orf38	CAPZB
C1orf142	CLSPN	CTA-215D11.4	C1orf35	C1orf41	CASP9
C1orf144	CLSTN1	CTBS	C1orf41	C1orf43	CC2D1B
C1orf145	CMPK1	CTD-2090I13.4	C1orf43	C1orf50	CCBL2
C1orf148	CNIH3	CTH	C1orf50	C1orf51	CCDC18
C1orf149	CNIH4	CTNNBIP1	C1orf51	C1orf52	CCDC21
C1orf151	CNN3	CTPS	C1orf52	C1orf53	CCDC23
C1orf156	COG2	CTSK	C1orf53	C1orf54	CCDC24
C1orf159	COL11A1	CTTNBP2NL	C1orf54	C1orf55	CCDC27
C1orf160	COL16A1	CYB561D1	C1orf55	C1orf56	CCDC28B
C1orf163	COL24A1	CYB5R1	C1orf56	C1orf57	CCDC76
C1orf165	COPA	CYR61	C1orf57	C1orf58	CCT3
C1orf166	CORT	DARS2	C1orf58	C1orf59	CD1D
C1orf168	CPSF3L	DBT	C1orf59	C1orf61	CD46
C1orf172	CPT2	DCLRE1B	C1orf61	C1orf63	CD53
C1orf173	CR628411.1	DDEFL1	C1orf63	C1orf65	CD55
C1orf174	CREB3L4	DDI2	C1orf66	C1orf66	CD58
C1orf175	CROCCL1	DDOST	C1orf67	C1orf67	CD84
C1orf176	CRTC2	DDR2	C1orf69	C1orf69	CDC14A
C1orf181	CRYZ	DDX20	C1orf71	C1orf70	CDC20
C1orf182	CSDE1	DDX59	C1orf74	C1orf71	CDC2L2
C1orf183	CSF1	DEDD	C1orf76	C1orf74	CDC42
C1orf187	CSRP1	DEGS1	C1orf77	C1orf76	CDC42BPA
C1orf19	CTBS	DENND1B	C1orf79	C1orf77	CDC42SE1
C1orf190	CTH	DENND2C	C1orf80	C1orf78	CDC7
C1orf194	CTNNBIP1	DENND4B	C1orf83	C1orf79	CDC73
C1orf196	CTPS	DEPDC1	C1orf85	C1orf80	CDCA8
C1orf198	CTTNBP2NL	DFFA	C1orf86	C1orf83	CDCP2
C1orf2	CYB561D1	DFFB	C1orf88	C1orf85	CDKN2C
C1orf200	CYB5R1	DHCR24	C1orf89	C1orf86	CELSR2
C1orf201	CYP2J2	DHDDS	C1orf9	C1orf88	CENPF
C1orf204	CYR61	DHRS3	C1orf91	C1orf89	CENPL
C1orf21	DAP3	DHX9	C1orf93	C1orf9	CENTB5
C1orf210	DARS2	DIO1	C1orf94	C1orf91	CEP170
C1orf212	DBT	DIRAS3	C1orf96	C1orf93	CEP350
C1orf213	DCLRE1B	DISC1	C1orf97	C1orf94	CEPT1
C1orf216	DDAH1	DLGAP3	C1orf98	C1orf95	CGN
C1orf220	DDEFL1	DMAP1	CA14	C1orf96	CHD1L
C1orf223	DDI2	DNAJB4	CABC1	C1orf97	CHML
C1orf25	DDOST	DNAJC11	CACHD1	CABC1	CKS1B
C1orf26	DDR2	DNAJC16	CACNA1E	CACHD1	CLCC1
C1orf27	DDX20	DNAJC6	CACYBP	CACNA1S	CLCN6
C1orf31	DEDD	DNAJC8	CADM3	CACYBP	CLIC4
C1orf32	DENND2C	DNALI1	CALML6	CADM3	CLK2
C1orf34	DENND4B	DNM3	CAMK2N1	CALML6	CLSPN
C1orf35	DEPDC1	DNTTIP2	CAMSAP1L1	CAMK2N1	CLSTN1
C1orf38	DFFA	DOCK7	CAMTA1	CAMSAP1L1	CMPK1
C1orf41	DFFB	DPH2	CAP1	CAMTA1	CNIH4
C1orf43	DHCR24	DPH5	CAPN2	CAP1	CNN3
C1orf50	DHDDS	DPM3	CAPZA1	CAPN2	COG2
C1orf51	DHRS3	DPYD	CAPZB	CAPZA1	COL24A1
C1orf52	DHX9	DR1	CASP9	CAPZB	COL9A2
C1orf53	DIO1	DTL	CASQ1	CASP9	COPA
C1orf54	DIRAS3	DUSP10	CASZ1	CASZ1	CORT
C1orf55	DMAP1	DUSP12	CC2D1B	CC2D1B	CPSF3L
C1orf56	DNAJB4	DUSP23	CCBL2	CCBL2	CPT2
C1orf57	DNAJC11	DVL1	CCDC18	CCDC18	CR1
C1orf58	DNAJC16	DYRK3	CCDC21	CCDC21	CR1L
C1orf59	DNAJC6	EBNA1BP2	CCDC23	CCDC23	CR2
C1orf61	DNAJC8	ECE1	CCDC24	CCDC24	CR628411.1
C1orf63	DNALI1	ECHDC2	CCDC28B	CCDC27	CREB3L4
C1orf65	DNM3	ECM1	CCDC76	CCDC28B	CREG1
C1orf66	DNTTIP2	EDEM3	CCT3	CCDC76	CROCCL1
C1orf67	DOCK7	EDG1	CD160	CCT3	CRTC2
C1orf69	DPH2	EFCAB2	CD1D	CD1D	CRYZ
C1orf70	DPH5	EFCAB7	CD34	CD244	CSDE1
C1orf71	DPM3	EFHD2	CD46	CD34	CSF1
C1orf74	DPYD	EGLN1	CD55	CD46	CSRP1
C1orf76	DR1	EIF2B3	CD58	CD52	CTBS
C1orf77	DTL	EIF2C1	CDA	CD53	CTH
C1orf78	DUSP10	EIF2C3	CDC14A	CD55	CTNNBIP1
C1orf79	DUSP12	EIF2C4	CDC20	CD58	CTPS
C1orf80	DVL1	EIF3I	CDC2L2	CD84	CTSS
C1orf83	DYRK3	EIF4G3	CDC42	CDA	CTTNBP2NL
C1orf85	EBNA1BP2	ELK4	CDC42BPA	CDC14A	CYB561D1
C1orf86	ECE1	ELOVL1	CDC42SE1	CDC20	CYB5R1
C1orf87	ECHDC2	ENAH	CDC7	CDC2L2	CYP2J2
C1orf88	ECM1	ENO1	CDC73	CDC42	CYR61
C1orf89	EDEM3	ENSA	CDCA8	CDC42BPA	DAP3
C1orf9	EDG1	EPHX1	CDCP2	CDC42SE1	DARC
C1orf91	EFCAB2	EPRS	CDKN2C	CDC7	DARS2
C1orf92	EFCAB7	EPS15	CELSR2	CDC73	DBT
C1orf93	EFHD2	ERMAP	CENPF	CDCA8	DCLRE1B
C1orf94	EFNA4	ERO1LB	CENPL	CDCP2	DDAH1
C1orf95	EGLN1	ERRFI1	CENTB5	CDKN2C	DDEFL1
C1orf96	EIF2B3	ETV3	CEP170	CELSR2	DDI2
C1orf97	EIF2C1	EXO1	CEP350	CENPF	DDOST
C1orf98	EIF2C3	EXOC8	CEPT1	CENPL	DDX20
CA14	EIF2C4	EXOSC10	CGN	CENTB5	DDX59
CABC1	EIF3I	EXTL2	CHD1L	CEP170	DEDD
CACHD1	EIF4G3	EYA3	CHD5	CEP350	DEGS1
CACNA1E	ELK4	FAF1	CHML	CEPT1	DENND1B
CACNA1S	ELOVL1	FAM102B	CHRNB2	CFH	DENND2C
CACYBP	ENAH	FAM129A	CKS1B	CGN	DENND2D
CADM3	ENO1	FAM152A	CLCC1	CHD1L	DENND4B
CALML6	ENSA	FAM20B	CLCN6	CHD5	DEPDC1
CAMK1G	EPB41	FAM36A	CLIC4	CHML	DFFA
CAMK2N1	EPHA2	FAM40A	CLK2	CHRNB2	DFFB
CAMSAP1L1	EPHB2	FAM46B	CLSPN	CITED4	DHCR24
CAMTA1	EPHX1	FAM46C	CLSTN1	CKS1B	DHDDS
CAP1	EPRS	FAM54B	CMPK1	CLCC1	DHRS3
CAPN2	EPS15	FAM63A	CNIH3	CLCN6	DHX9
CAPZA1	ERMAP	FAM69A	CNIH4	CLCNKA	DIO1
CAPZB	ERO1LB	FAM76A	CNN3	CLCNKB	DISC1
CASP9	ERRFI1	FAM78B	COG2	CLIC4	DMAP1
CASQ2	ESRRG	FAM89A	COL11A1	CLK2	DNAJB4
CASZ1	ETV3	FBLIM1	COL16A1	CLSPN	DNAJC11
CC2D1B	EXO1	FBXO28	COL24A1	CLSTN1	DNAJC16
CCBL2	EXOC8	FBXO42	COL9A2	CMPK1	DNAJC6
CCDC18	EXOSC10	FDPS	COPA	CNIH3	DNAJC8
CCDC21	EXTL2	FGGY	CORT	CNIH4	DNALI1
CCDC23	EYA3	FH	CPSF3L	CNN3	DNM3
CCDC24	F11R	FHL3	CPT2	CNTN2	DNTTIP2
CCDC27	FAF1	FLAD1	CR589924.4	COG2	DOCK7
CCDC28B	FAM102B	FLVCR1	CR628411.1	COL11A1	DPH2
CCDC76	FAM152A	FMO5	CRABP2	COL24A1	DPH5
CCT3	FAM19A3	FMO6P	CREB3L4	COL8A2	DPM3
CD160	FAM20B	FMOD	CREG1	COL9A2	DPYD
CD164L2	FAM36A	FOXJ3	CROCC	COPA	DR1
CD1D	FAM40A	FRAP1	CROCCL1	CORT	DTL
CD34	FAM46C	FRRS1	CRTC2	CPSF3L	DUSP10
CD46	FAM54B	FUBP1	CRYZ	CPT2	DUSP12
CD55	FAM5B	FUCA1	CSDE1	CR1	DUSP23
CD58	FAM5C	FUSIP1	CSF1	CR1L	DVL1
CDC14A	FAM63A	GADD45A	CSMD2	CR2	DYRK3
CDC20	FAM69A	GALE	CSRP1	CR628411.1	E2F2
CDC2L2	FAM73A	GALNT2	CTA-215D11.4	CRABP2	EBNA1BP2
CDC42	FAM76A	GATAD2B	CTBS	CRCT1	ECE1
CDC42BPA	FBLIM1	GBA	CTD-2090I13.4	CREB3L4	ECHDC2
CDC42SE1	FBXO2	GBP1	CTH	CREG1	EDARADD
CDC7	FBXO28	GBP2	CTNNBIP1	CROCCL1	EDEM3
CDC73	FBXO42	GBP3	CTPS	CRTC2	EFCAB2
CDCA8	FBXO44	GCLM	CTSE	CRYZ	EFCAB7
CDCP2	FDPS	GDAP2	CTTNBP2NL	CSDE1	EFHD2
CDKN2C	FGGY	GGPS1	CYB561D1	CSF1	EFNA1
CELSR2	FH	GJA9	CYB5R1	CSF3R	EFNA4
CENPF	FHL3	GLMN	CYP2J2	CSMD2	EGLN1
CENPL	FLAD1	GLRX2	CYR61	CSRP1	EIF2B3
CENTB5	FLVCR1	GLUL	DAB1	CTBS	EIF2C1
CEP170	FMN2	GMEB1	DAP3	CTH	EIF2C3
CEP350	FMO1	GNAI3	DARS2	CTNNBIP1	EIF2C4
CEPT1	FMO5	GNB1	DBT	CTPS	EIF3I
CGN	FNBP1L	GNG12	DCLRE1B	CTSS	EIF4G3
CHD1L	FNDC7	GNG5	DDAH1	CTTNBP2NL	ELK4
CHD5	FOXD2	GNL2	DDEFL1	CYB561D1	ELOVL1
CHML	FOXJ3	GNPAT	DDI2	CYB5R1	ENAH
CHRM3	FRAP1	GNRHR2	DDOST	CYP2J2	ENO1
CHRNB2	FUBP1	GON4L	DDR2	CYP4X1	ENO1P
CITED4	FUCA1	GPATCH2	DDX20	CYR61	ENSA
CKS1B	FUSIP1	GPATCH3	DDX59	DAB1	EPB41
CLCC1	GADD45A	GPATCH4	DEDD	DAP3	EPHX1
CLCN6	GALE	GPBP1L1	DEGS1	DARS2	EPRS
CLCNKA	GALNT2	GPR137B	DENND1B	DBT	EPS15
CLCNKB	GATAD2B	GPR161	DENND2C	DCLRE1B	ERMAP
CLDN19	GBA	GPR177	DENND4B	DDAH1	ERO1LB
CLIC4	GBP1	GPR3	DEPDC1	DDEFL1	ERRFI1
CLK2	GBP2	GPSM2	DFFA	DDI2	ESPN
CLSPN	GBP3	GPX7	DFFB	DDOST	ETV3
CLSTN1	GBP4	GREM2	DHCR24	DDX20	EXO1
CMPK1	GCLM	GSTM4	DHDDS	DDX59	EXOC8
CNIH3	GDAP2	GTF2B	DHRS3	DEDD	EXOSC10
CNIH4	GGPS1	GUK1	DHX9	DEGS1	EXTL2
CNKSR1	GIPC2	H3F3A	DIO1	DENND1B	EYA3
CNN3	GJA5	H6PD	DIRAS3	DENND2C	F11R
CNTN2	GJA9	HAX1	DISC1	DENND2D	F3
COG2	GLIS1	HBXIP	DLGAP3	DENND4B	FAAH
COL11A1	GLMN	HCN3	DMAP1	DEPDC1	FABP3
COL16A1	GLRX2	HDAC1	DMRTA2	DFFA	FAF1
COL24A1	GLT25D2	HDGF	DNAJB4	DFFB	FAM102B
COL8A2	GLTPD1	HEATR1	DNAJC11	DHCR24	FAM129A
COL9A2	GLUL	HECTD3	DNAJC16	DHDDS	FAM152A
COPA	GMEB1	HHAT	DNAJC6	DHRS3	FAM19A3
CORT	GNAI3	HHLA3	DNAJC8	DHX9	FAM20B
CPSF3L	GNB1	HIAT1	DNALI1	DIO1	FAM36A
CPT2	GNG12	HIPK1	DNM3	DIRAS3	FAM40A
CR1	GNG5	HIST2H2AA3	DNTTIP2	DISC1	FAM46C
CR2	GNL2	HIST2H2AA4	DOCK7	DLGAP3	FAM54B
CR589902.3	GNPAT	HIST2H2AB	DPH2	DMAP1	FAM63A
CR589924.4	GNRHR2	HIST2H2AC	DPH5	DMRTA2	FAM69A
CR628411.1	GON4L	HIST2H2BC	DPM3	DMRTB1	FAM72B
CR812485.4	GPATCH2	HIST2H2BD	DPYD	DNAJB4	FAM73A
CRABP2	GPATCH3	HIST2H2BE	DR1	DNAJC11	FAM76A
CREB3L4	GPATCH4	HIST2H3A	DRD5P2	DNAJC16	FAM78B
CREG1	GPBP1L1	HIST2H3C	DTL	DNAJC6	FAM80A
CROCC	GPR137B	HIVEP3	DUSP10	DNAJC8	FAM89A
CROCCL1	GPR157	HLX	DUSP12	DNALI1	FBXO28
CRTC2	GPR161	HMCN1	DVL1	DNM3	FBXO42
CRYZ	GPR177	HMGCL	DYRK3	DNTTIP2	FBXO6
CSDE1	GPR3	HMGN2	E2F2	DOCK7	FCRLB
CSF1	GREM2	HNRNPR	EBNA1BP2	DPH2	FDPS
CSMD2	GSTM2	HNRNPU	ECE1	DPH5	FGGY
CSRP1	GSTM4	HNRPCL1	ECHDC2	DPM3	FH
CTBS	GTF2B	HP1BP3	ECM1	DPYD	FHL3
CTH	GUK1	HS2ST1	EDARADD	DR1	FLAD1
CTNNBIP1	H3F3A	HSPG2	EDEM3	DTL	FLVCR1
CTPS	H6PD	HYI	EDG1	DUSP10	FMO1
CTTNBP2NL	HAX1	IARS2	EDN2	DUSP12	FMO4
CYB561D1	HBXIP	ICMT	EFCAB2	DUSP23	FMO5
CYB5R1	HCN3	ID3	EFCAB7	DVL1	FNBP1L
CYP2J2	HDAC1	IER5	EFHD2	DYRK3	FOXD2
CYP4X1	HDGF	IFI16	EFNA1	E2F2	FOXD3
CYR61	HEATR1	IFI6	EFNA3	EBNA1BP2	FOXJ3
DAB1	HECTD3	IGSF8	EFNA4	ECE1	FOXO6
DAP3	HES5	IKBKE	EGLN1	ECHDC2	FRAP1
DARC	HFM1	IL6R	EIF2B3	EDARADD	FRRS1
DARS2	HHAT	ILF2	EIF2C1	EDEM3	FUBP1
DBT	HHLA3	INADL	EIF2C3	EDG1	FUCA1
DCLRE1B	HIAT1	INPP5B	EIF2C4	EFCAB2	FUSIP1
DDAH1	HIPK1	INTS3	EIF3I	EFCAB7	G0S2
DDEFL1	HIST2H2AA3	INTS7	EIF4G3	EFHD2	GADD45A
DDI2	HIST2H2AA4	IPO13	ELK4	EFNA1	GALE
DDOST	HIST2H2AB	IPO9	ELOVL1	EFNA3	GALNT2
DDX20	HIST2H2AC	IPP	ELTD1	EFNA4	GATAD2B
DDX59	HIST2H2BC	IQCC	ENAH	EGLN1	GBA
DEDD	HIST2H2BD	IQGAP3	ENO1	EIF2B3	GBP1
DEGS1	HIST2H2BE	IQWD1	ENO1P	EIF2C1	GBP4
DENND1B	HIST2H3A	IRF2BP2	ENSA	EIF2C3	GCLM
DENND2C	HIST2H3C	ISG15	EPB41	EIF2C4	GDAP2
DENND2D	HIST3H2A	ISG20L2	EPHA10	EIF3I	GFI1
DENND4B	HIST3H2BB	ITGA10	EPHA2	EIF4G3	GGPS1
DEPDC1	HLX	ITGB3BP	EPHA8	ELAVL4	GIPC2
DFFA	HMCN1	ITPKB	EPHB2	ELK4	GJA9
DFFB	HMGCL	IVNS1ABP	EPHX1	ELOVL1	GLMN
DHCR24	HMGN2	JAK1	EPRS	ENAH	GLRX2
DHDDS	HNRNPR	JARID1B	EPS15	ENO1	GLT25D2
DHRS3	HNRNPU	JMJD2A	ERMAP	ENO1P	GLTPD1
DHX9	HP1BP3	JMJD4	ERO1LB	ENSA	GLUL
DIO1	HS2ST1	JTB	ERRFI1	EPB41	GMEB1
DIRAS3	HSD3B1	JUN	ESRRG	EPHA10	GNAI3
DISC1	HSPG2	KCNAB2	ETNK2	EPHA2	GNB1
DLGAP3	HYI	KCNH1	ETV3	EPHA8	GNG5
DMAP1	IARS2	KCNJ10	EXO1	EPHB2	GNL2
DMRTA2	ICMT	KCNK2	EXOC8	EPHX1	GNPAT
DNAJB4	ID3	KCNT2	EXOSC10	EPRS	GNRHR2
DNAJC11	IER5	KCTD3	EXTL2	EPS15	GOLPH3L
DNAJC16	IFI6	KHDRBS1	EYA3	ERMAP	GON4L
DNAJC6	IGSF8	KIAA0090	F11R	ERO1LB	GPATCH2
DNAJC8	IGSF9	KIAA0133	FAF1	ERRFI1	GPATCH3
DNALI1	IKBKE	KIAA0319L	FAM102B	ESPN	GPATCH4
DNM3	IL22RA1	KIAA0460	FAM152A	ESRRG	GPBP1L1
DNTTIP2	IL28RA	KIAA0467	FAM19A3	ETNK2	GPR137B
DOCK7	IL6R	KIAA0494	FAM20B	ETV3	GPR153
DPH2	ILF2	KIAA0562	FAM36A	EXO1	GPR157
DPH5	INADL	KIAA0859	FAM40A	EXOC8	GPR161
DPM3	INPP5B	KIAA1324	FAM43B	EXOSC10	GPR3
DPYD	INTS3	KIAA1383	FAM46B	EXTL2	GPR88
DR1	INTS7	KIAA1522	FAM46C	EYA3	GPR89A
DRD5P2	IPO13	KIAA1614	FAM54B	F11R	GPR89B
DTL	IPO9	KIAA2013	FAM5B	F3	GPSM2
DUSP10	IPP	KIF1B	FAM5C	FAAH	GPX7
DUSP12	IQCC	KIF26B	FAM63A	FABP3	GRHL3
DUSP23	IQGAP3	KIF2C	FAM69A	FAF1	GRRP1
DUSP5P	IQWD1	KIFAP3	FAM72B	FAM102B	GSTM3
DVL1	IRF2BP2	KIRREL	FAM73A	FAM129A	GSTM4
DYRK3	ISG15	KLHDC9	FAM76A	FAM131C	GTF2B
E2F2	ISG20L2	KLHL12	FAM78B	FAM132A	GUK1
EBNA1BP2	ITGB3BP	KLHL17	FAM80A	FAM152A	H3F3A
ECE1	ITPKB	KLHL20	FBXO2	FAM159A	H6PD
ECHDC2	IVNS1ABP	KLHL21	FBXO28	FAM19A3	HAX1
EDARADD	JAK1	KMO	FBXO42	FAM20B	HBXIP
EDEM3	JARID1B	KPNA6	FBXO44	FAM36A	HCN3
EDG1	JMJD2A	KPRP	FCRLB	FAM40A	HDAC1
EDN2	JMJD4	KRTCAP2	FDPS	FAM43B	HDGF
EFCAB2	JTB	KTI12	FGGY	FAM46B	HEATR1
EFCAB7	JUN	LAMC1	FH	FAM46C	HECTD3
EFHD2	KCNAB2	LASS2	FHAD1	FAM54B	HES2
EFNA1	KCND3	LBR	FHL3	FAM63A	HES5
EFNA3	KCNH1	LDLRAD1	FLAD1	FAM69A	HEYL
EFNA4	KCNJ10	LEPR	FLVCR1	FAM73A	HFM1
EGLN1	KCNK1	LEPRE1	FMO1	FAM76A	HHAT
EIF2B3	KCNK2	LEPROT	FMO5	FAM78B	HHLA3
EIF2C1	KCNT2	LGALS8	FNBP1L	FAM80A	HIAT1
EIF2C3	KCTD3	LGTN	FNDC7	FAM89A	HIPK1
EIF2C4	KHDRBS1	LHX9	FOXD2	FBLIM1	HIST2H2AA3
EIF3I	KIAA0090	LIN9	FOXJ3	FBXO2	HIST2H2AA4
EIF4G3	KIAA0133	LIX1L	FOXO6	FBXO28	HIST2H2AB
ELF3	KIAA0319L	LMNA	FRAP1	FBXO42	HIST2H2AC
ELK4	KIAA0460	LMO4	FRRS1	FBXO44	HIST2H2BC
ELOVL1	KIAA0467	LMOD1	FUBP1	FBXO6	HIST2H2BD
ELTD1	KIAA0494	LPHN2	FUCA1	FCER1A	HIST2H2BE
ENAH	KIAA0562	LRIG2	FUSIP1	FCRLB	HIST2H2BF
ENO1	KIAA0859	LRRC40	GADD45A	FDPS	HIST2H3A
ENO1P	KIAA0907	LRRC41	GALE	FGGY	HIST2H3C
ENSA	KIAA1324	LRRC42	GALNT2	FGR	HIST2H3D
EPB41	KIAA1383	LRRC44	GATAD2B	FH	HIST3H2A
EPHA10	KIAA1522	LRRC47	GBA	FHL3	HIST3H2BB
EPHA2	KIAA1614	LRRC8B	GBP1	FLAD1	HLX
EPHA8	KIAA2013	LRRC8C	GBP3	FLVCR1	HMCN1
EPHB2	KIF14	LSM10	GCLM	FMN2	HMGCL
EPHX1	KIF1B	LUZP1	GDAP2	FMO1	HMGN2
EPRS	KIF26B	LYPLA2	GGPS1	FMO5	HNRNPR
EPS15	KIF2C	LYPLAL1	GJA9	FNBP1L	HNRNPU
ERMAP	KIFAP3	LYSMD1	GJB3	FNDC5	HOOK1
ERO1LB	KIRREL	LYST	GJB4	FOXD2	HP1BP3
ERRFI1	KLHL12	LZIC	GJC2	FOXD3	HPDL
ERVK5	KLHL17	MACF1	GLMN	FOXE3	HS2ST1
ESPN	KLHL20	MAGI3	GLRX2	FOXJ3	HSD17B7
ESRRG	KLHL21	MAGOH	GLT25D2	FOXO6	HSPA6
ETNK2	KPNA6	MAN1A2	GLTPD1	FRAP1	HSPG2
ETV3	KRTCAP2	MAN1C1	GLUL	FRRS1	HYI
EXO1	KTI12	MAP3K6	GMEB1	FUBP1	IARS2
EXOC8	LAMC1	MAP7D1	GNAI3	FUCA1	ICMT
EXOSC10	LASS2	MAPKAPK2	GNB1	FUSIP1	ID3
EXTL1	LBR	MARK1	GNG12	G0S2	IER5
EXTL2	LCK	MAST2	GNG5	GABRD	IFI6
EYA3	LDLRAP1	MCL1	GNL2	GADD45A	IGSF3
F11R	LEPR	MCOLN2	GNPAT	GALE	IGSF8
F3	LEPRE1	MDM4	GNRHR2	GALNT2	IGSF9
FAAH	LEPROT	MECR	GOLPH3L	GATAD2B	IKBKE
FABP3	LGALS8	MED18	GOLT1A	GBA	IL12RB2
FAF1	LGTN	MED8	GON4L	GBP1	IL28RA
FAM102B	LHX4	MEF2D	GPATCH2	GBP2	ILF2
FAM108A2	LHX9	MEX3A	GPATCH3	GBP3	INPP5B
FAM108A3	LIN9	MFN2	GPATCH4	GBP4	INTS3
FAM129A	LIX1L	MFSD2	GPBP1L1	GBP5	INTS7
FAM131C	LMNA	MGST3	GPR137B	GCLM	IPO13
FAM138A	LMO4	MIA3	GPR157	GDAP2	IPO9
FAM152A	LMOD1	MIB2	GPR161	GFI1	IPP
FAM159A	LPGAT1	MIER1	GPR177	GGPS1	IQCC
FAM19A3	LPHN2	MLLT11	GPR3	GIPC2	IQGAP3
FAM20B	LRIG2	MMACHC	GPR89A	GJA9	IQWD1
FAM36A	LRP8	MOBKL2C	GPSM2	GJB3	IRF2BP2
FAM40A	LRRC40	MORN1	GPX7	GLIS1	IRF6
FAM43B	LRRC41	MOSC2	GREM2	GLMN	ISG15
FAM46B	LRRC42	MOV10	GRHL3	GLRX2	ISG20L2
FAM46C	LRRC44	MPZ	GRRP1	GLT25D2	ITGB3BP
FAM54B	LRRC47	MPZL1	GSTM3	GLTPD1	ITPKB
FAM5B	LRRC7	MR1	GSTM4	GLUL	IVNS1ABP
FAM5C	LRRC8C	MRPL20	GTF2B	GMEB1	JAK1
FAM63A	LRRC8D	MRPL24	GUK1	GNAI3	JARID1B
FAM69A	LSM10	MRPL37	H3F3A	GNB1	JMJD2A
FAM72A	LUZP1	MRPL55	H6PD	GNG12	JMJD4
FAM72B	LYPLA2	MRPL9	HAPLN2	GNG4	JTB
FAM73A	LYPLAL1	MRPS14	HAX1	GNG5	JUN
FAM76A	LYSMD1	MRPS15	HBXIP	GNL2	KCNAB2
FAM78B	LYST	MRPS21	HCN3	GNPAT	KCNC4
FAM80A	LZIC	MRTO4	HDAC1	GNRHR2	KCNJ10
FAM89A	MACF1	MTF1	HDGF	GOLPH3L	KCNJ9
FBLIM1	MAD2L2	MTF2	HEATR1	GON4L	KCNK1
FBXO2	MAGI3	MTHFR	HECTD3	GPATCH2	KCNQ4
FBXO28	MAGOH	MTMR11	HES5	GPATCH3	KCNT2
FBXO42	MAN1A2	MTR	HFM1	GPATCH4	KCTD3
FBXO44	MAN1C1	MTX1	HHAT	GPBP1L1	KHDRBS1
FBXO6	MAP3K6	MUTYH	HHLA3	GPR137B	KIAA0090
FCRLB	MAP7D1	MXRA8	HIAT1	GPR153	KIAA0133
FDPS	MAPKAPK2	MYCBP	HIPK1	GPR157	KIAA0319L
FGGY	MAST2	MYOM3	HIST2H2AA3	GPR161	KIAA0460
FGR	MCL1	MYSM1	HIST2H2AA4	GPR177	KIAA0467
FH	MDM4	NASP	HIST2H2AB	GPR25	KIAA0494
FHL3	MECR	NBPF15	HIST2H2AC	GPR3	KIAA0562
FLAD1	MED18	NBPF3	HIST2H2BC	GPR88	KIAA0859
FLVCR1	MED8	NCDN	HIST2H2BD	GPR89A	KIAA0907
FMN2	MEF2D	NCSTN	HIST2H2BE	GPR89B	KIAA1383
FMO1	MEGF6	NDUFS2	HIST2H3A	GPSM2	KIAA1522
FMO4	MEX3A	NDUFS5	HIST2H3C	GPX7	KIAA2013
FMO5	MFN2	NECAP2	HIVEP3	GREM2	KIF14
FNBP1L	MFSD2	NEGR1	HMCN1	GRHL3	KIF1B
FNDC5	MGST3	NEK7	HMGCL	GRIK3	KIF26B
FOXD2	MIA3	NENF	HMGN2	GRRP1	KIF2C
FOXD3	MIB2	NEXN	HNRNPR	GSTM2	KIFAP3
FOXJ3	MIER1	NFASC	HNRNPU	GSTM3	KLHDC9
FOXO6	MKNK1	NFIA	HP1BP3	GSTM4	KLHL12
FRAP1	MLLT11	NFYC	HPCAL4	GSTM5	KLHL17
FRRS1	MMACHC	NID1	HS2ST1	GTF2B	KLHL20
FUBP1	MOBKL2C	NIT1	HSPA6	GUK1	KLHL21
FUCA1	MORN1	NME7	HSPG2	H3F3A	KMO
FUSIP1	MOSC2	NMNAT1	HTR1D	H6PD	KPNA6
G0S2	MOV10	NOC2L	IARS2	HAX1	KRTCAP2
GABRD	MPZ	NOL9	ICMT	HBXIP	KTI12
GADD45A	MPZL1	NOS1AP	ID3	HCN3	LAMC1
GALE	MR1	NPAL3	IER5	HCRTR1	LAPTM5
GALNT2	MRPL20	NPHP4	IFI16	HDAC1	LASS2
GATAD2B	MRPL24	NPL	IFI44	HDGF	LBR
GBA	MRPL37	NRAS	IFI6	HEATR1	LDLRAP1
GCLM	MRPL55	NRD1	IGSF21	HECTD3	LEPR
GDAP2	MRPL9	NSL1	IGSF3	HES2	LEPRE1
GFI1	MRPS14	NSUN4	IGSF8	HES3	LEPROT
GGPS1	MRPS15	NTNG1	IGSF9	HES4	LGALS8
GIPC2	MRPS21	NUAK2	IKBKE	HES5	LGTN
GJA4	MRTO4	NUCKS1	IL22RA1	HEYL	LHX4
GJA5	MTF1	NUDC	IL24	HFE2	LIN9
GJA9	MTF2	NUF2	IL28RA	HFM1	LIX1L
GJB3	MTHFR	NUP133	IL6R	HHAT	LMNA
GLIS1	MTMR11	NVL	ILF2	HHLA3	LMO4
GLMN	MTR	OAZ3	INADL	HIAT1	LMOD1
GLRX2	MTX1	ODF2L	INPP5B	HIPK1	LPGAT1
GLT25D2	MUC1	OLFML2B	INSRR	HIST2H2AA3	LRIG2
GLTPD1	MUTYH	OLFML3	INTS3	HIST2H2AA4	LRP8
GLUL	MXRA8	OMA1	INTS7	HIST2H2AB	LRRC40
GMEB1	MYCBP	OR2AK2	IPO13	HIST2H2AC	LRRC41
GNAI3	MYOM3	ORC1L	IPO9	HIST2H2BC	LRRC42
GNB1	MYSM1	OSBPL9	IPP	HIST2H2BD	LRRC44
GNG12	NADK	OTUD3	IQCC	HIST2H2BE	LRRC47
GNG4	NASP	OTUD7B	IQGAP3	HIST2H2BF	LRRC7
GNG5	NAV1	PABPC4	IQWD1	HIST2H3A	LRRC8B
GNL2	NBL1	PAFAH2	IRF2BP2	HIST2H3C	LRRC8C
GNPAT	NBPF15	PALMD	ISG15	HIST2H3D	LRRC8D
GNRHR2	NBPF3	PAQR7	ISG20L2	HIST3H2A	LRRN2
GOLPH3L	NCDN	PARK7	ITGB3BP	HIST3H2BB	LSM10
GOLT1A	NCSTN	PARS2	ITPKB	HIVEP3	LUZP1
GON4L	NDUFS2	PBXIP1	IVL	HLX	LYPLA2
GPATCH2	NDUFS5	PCNXL2	IVNS1ABP	HMCN1	LYPLAL1
GPATCH3	NECAP2	PDE4B	JAK1	HMGCL	LYSMD1
GPATCH4	NEGR1	PDE4DIP	JARID1B	HMGN2	LYST
GPBP1L1	NEK2	PDIK1L	JMJD2A	HNRNPR	LZIC
GPR137B	NEK7	PEA15	JMJD4	HNRNPU	MACF1
GPR153	NENF	PEAR1	JTB	HOOK1	MAD2L2
GPR157	NEXN	PEF1	JUN	HP1BP3	MAGI3
GPR161	NFASC	PEX11B	KCNA2	HPCA	MAGOH
GPR177	NFIA	PEX14	KCNA3	HPCAL4	MAN1A2
GPR3	NFYC	PEX19	KCNAB2	HPDL	MAN1C1
GPR88	NGF	PFDN2	KCNC4	HS2ST1	MANEAL
GPR89A	NID1	PFKFB2	KCND3	HSD17B7	MAP3K19
GPR89B	NIT1	PGBD2	KCNJ10	HSPA6	MAP3K6
GPSM2	NME7	PGD	KCNK1	HSPB7	MAP7D1
GPX7	NMNAT1	PGM1	KCNT2	HSPG2	MAPKAPK2
GREM2	NOC2L	PHACTR4	KCTD3	HTR6	MARCKSL1
GRHL3	NOL9	PHC2	KHDRBS1	HYI	MAST2
GRIK3	NOTCH2NL	PHF13	KIAA0090	IARS2	MATN1
GRRP1	NPAL3	PHGDH	KIAA0133	ICMT	MCL1
GSTM1	NPHP4	PHLDA3	KIAA0319L	ID3	MCOLN2
GSTM2	NPL	PHTF1	KIAA0460	IER5	MDM4
GSTM3	NR5A2	PI4KB	KIAA0467	IFI16	MECR
GSTM4	NRAS	PIAS3	KIAA0494	IFI44	MED18
GSTM5	NRD1	PIGK	KIAA0562	IFI44L	MED8
GTF2B	NSL1	PIGM	KIAA0859	IFI6	MEF2D
GUK1	NSUN4	PIGV	KIAA0907	IGSF21	MEGF6
H3F3A	NUAK2	PIK3C2B	KIAA1324	IGSF3	MEX3A
H6PD	NUCKS1	PIK3R3	KIAA1383	IGSF8	MFN2
HAPLN2	NUDC	PINK1	KIAA1522	IGSF9	MFSD2
HAX1	NUF2	PIP5K1A	KIAA1614	IKBKE	MGST3
HBXIP	NUP133	PKN2	KIAA2013	IL12RB2	MIA3
HCN3	NVL	PLA2G4A	KIF14	IL28RA	MIB2
HCRTR1	OAZ3	PLEKHM2	KIF1B	IL6R	MIER1
HDAC1	ODF2L	PLEKHO1	KIF21B	ILF2	MIXL1
HDGF	OLFML2B	PLK3	KIF26B	INADL	MKNK1
HEATR1	OLFML3	PLOD1	KIF2C	INPP5B	MLLT11
HECTD3	OMA1	PLXNA2	KIFAP3	INSRR	MMACHC
HES2	OPN3	PM20D1	KIRREL	INTS3	MOBKL2C
HES3	ORC1L	PMVK	KISS1	INTS7	MORN1
HES4	OSBPL9	PNRC2	KLHDC7A	IPO13	MOSC1
HES5	OTUD3	POGK	KLHL12	IPO9	MOSC2
HEYL	OTUD7B	POGZ	KLHL17	IPP	MOV10
HFE2	PABPC4	POLR3C	KLHL20	IQCC	MPZ
HFM1	PAFAH2	POLR3GL	KLHL21	IQGAP3	MPZL1
HHAT	PALMD	POMGNT1	KMO	IQWD1	MR1
HHLA3	PANK4	POU2F1	KPNA6	IRF2BP2	MRPL20
HIAT1	PAQR7	PPAP2B	KRTCAP2	IRF6	MRPL24
HIPK1	PARK7	PPCS	KTI12	ISG15	MRPL37
HIST2H2AA3	PARP1	PPFIA4	LAMB3	ISG20L2	MRPL55
HIST2H2AA4	PARS2	PPIE	LAMC1	ITGB3BP	MRPL9
HIST2H2AB	PBX1	PPIH	LAMC2	ITPKB	MRPS14
HIST2H2AC	PBXIP1	PPP1R12B	LASS2	IVNS1ABP	MRPS15
HIST2H2BC	PCNXL2	PPP1R15B	LBR	JAK1	MRPS21
HIST2H2BD	PDE4B	PPP1R8	LDLRAP1	JARID1B	MRTO4
HIST2H2BE	PDE4DIP	PPP2R5A	LEMD1	JMJD2A	MSTO1
HIST2H2BF	PDIK1L	PPT1	LEPR	JMJD4	MTF1
HIST2H3A	PEA15	PQLC2	LEPRE1	JTB	MTF2
HIST2H3C	PEAR1	PRAMEF2	LEPROT	JUN	MTHFR
HIST2H3D	PEF1	PRCC	LGALS8	KANK4	MTR
HIST2H4A	PER3	PRDM2	LGTN	KCNA2	MTX1
HIST2H4B	PEX10	PRDX1	LHX4	KCNA3	MUC1
HIST3H2A	PEX11B	PRDX6	LHX8	KCNAB2	MUTYH
HIST3H2BB	PEX14	PRELP	LHX9	KCNC4	MYCBP
HIVEP3	PEX19	PRKAA2	LIN9	KCND3	MYCL1
HLX	PFDN2	PRKAB2	LIX1L	KCNH1	MYSM1
HMCN1	PFKFB2	PRKACB	LMNA	KCNJ10	NADK
HMGCL	PGBD2	PRMT6	LMO4	KCNJ9	NASP
HMGN2	PGD	PRNPIP	LMOD1	KCNK1	NBL1
HNRNPR	PHACTR4	PROX1	LMX1A	KCNK2	NBPF15
HNRNPU	PHC2	PRPF3	LOR	KCNQ4	NBPF3
HOOK1	PHF13	PRPF38A	LPGAT1	KCNT2	NCDN
HP1BP3	PHGDH	PRPF38B	LPHN2	KCTD3	NCSTN
HPCA	PHLDA3	PRRX1	LRIG2	KHDRBS1	NDUFS2
HPDL	PHTF1	PRUNE	LRP8	KIAA0090	NDUFS5
HS2ST1	PI4KB	PSEN2	LRRC40	KIAA0133	NECAP2
HSD17B7	PIAS3	PSMA5	LRRC41	KIAA0319L	NEGR1
HSPA6	PIGK	PSMB2	LRRC42	KIAA0460	NEK2
HSPB7	PIGM	PSMB4	LRRC44	KIAA0467	NEK7
HSPG2	PIGV	PSMD4	LRRC47	KIAA0494	NENF
HTR6	PIK3C2B	PSRC1	LRRC7	KIAA0562	NEXN
HYI	PIK3R3	PTBP2	LRRC8B	KIAA0859	NFIA
IARS2	PINK1	PTGFR	LRRC8C	KIAA0907	NFYC
ICMT	PIP5K1A	PTGS2	LRRC8D	KIAA1324	NID1
ID3	PKN2	PTP4A2	LRRN2	KIAA1383	NIT1
IER5	PLA2G4A	PTPN14	LSM10	KIAA1522	NME7
IFI16	PLEKHG5	PTPRU	LUZP1	KIAA1614	NMNAT1
IFI6	PLEKHM2	PUM1	LYPLA2	KIAA1751	NOC2L
IGSF21	PLEKHO1	PYCR2	LYPLAL1	KIAA2013	NOL9
IGSF3	PLK3	PYGO2	LYSMD1	KIF14	NOS1AP
IGSF8	PLOD1	QSOX1	LYST	KIF17	NOTCH2
IGSF9	PLXNA2	RAB13	LZIC	KIF1B	NOTCH2NL
IKBKE	PMF1	RAB3GAP2	MAD2L2	KIF21B	NPAL3
IL12RB2	PMVK	RAB4A	MAGI3	KIF26B	NPHP4
IL28RA	PNRC2	RAB7L1	MAGOH	KIF2C	NPL
IL6R	POGK	RABGAP1L	MAN1A2	KIFAP3	NPR1
ILF2	POGZ	RABGGTB	MANEAL	KIRREL	NR5A2
INADL	POLR3C	RABIF	MAP1LC3C	KLHDC9	NRAS
INPP5B	POLR3GL	RAD54L	MAP3K19	KLHL12	NRD1
INSRR	POMGNT1	RAG1AP1	MAP3K6	KLHL17	NSL1
INTS3	POU2F1	RALGPS2	MAP7D1	KLHL20	NSUN4
INTS7	PPAP2B	RAP1A	MAPKAPK2	KLHL21	NTRK1
IPO13	PPAPR5	RASAL2	MARCKSL1	KMO	NUAK2
IPO9	PPCS	RAVER2	MARK1	KPNA6	NUCKS1
IPP	PPFIA4	RBBP4	MAST2	KRTCAP2	NUDC
IQCC	PPIE	RBBP5	MATN1	KTI12	NUDT17
IQGAP3	PPIH	RBM15	MCL1	L1TD1	NUF2
IQWD1	PPM1J	RBM34	MCOLN2	LAD1	NUP133
IRF2BP2	PPOX	RBM8A	MDM4	LAMC1	NVL
IRF6	PPP1R12B	RBMXL1	MECR	LAMC2	OAZ3
ISG15	PPP1R15B	RCC1	MED18	LAPTM5	OBSCN
ISG20L2	PPP1R8	RCC2	MED8	LASS2	ODF2L
ITGB3BP	PPP2R5A	RCOR3	MEF2D	LAX1	OLFML2B
ITPKB	PPT1	RER1	MEGF6	LBR	OMA1
IVNS1ABP	PQLC2	RERE	MEX3A	LCE5A	OPN3
JAK1	PRCC	RFWD2	MFAP2	LDLRAD2	OR2AJ1
JARID1B	PRDM2	RGL1	MFN2	LDLRAP1	OR2L13
JMJD2A	PRDX1	RGS2	MFSD2	LEPR	ORC1L
JMJD4	PRDX6	RGS4	MGST3	LEPRE1	OSBPL9
JTB	PRKAA2	RHCE	MIA3	LEPROT	OTUD3
JUN	PRKAB2	RHOC	MIB2	LGALS8	OTUD7B
KANK4	PRKACB	RIPK5	MIER1	LGR6	PABPC4
KCNA2	PRMT6	RIT1	MLLT11	LGTN	PAFAH2
KCNA3	PRNPIP	RLF	MMACHC	LHX4	PANK4
KCNAB2	PROX1	RNASEL	MOBKL2C	LHX8	PAQR7
KCNC4	PRPF3	RNF11	MORN1	LHX9	PARK7
KCND3	PRPF38A	RNF19B	MOSC1	LIN9	PARP1
KCNH1	PRPF38B	RNF2	MOSC2	LIX1L	PARS2
KCNJ10	PRRX1	RNF220	MOV10	LMNA	PBX1
KCNJ9	PRUNE	RNPC3	MPZ	LMO4	PBXIP1
KCNK1	PSEN2	RNPEP	MPZL1	LMOD1	PCNXL2
KCNK2	PSMA5	RNU105A	MR1	LOR	PCP4L1
KCNN3	PSMB2	RNU11	MRPL20	LPGAT1	PCSK9
KCNQ4	PSMB4	ROR1	MRPL24	LPHN2	PCTK3
KCNT2	PSMD4	RP1-144C9.2	MRPL37	LRIG2	PDE4DIP
KCTD3	PSRC1	RP1-21K4.1	MRPL55	LRP8	PDIK1L
KHDRBS1	PTBP2	RP1-21O18.1	MRPL9	LRRC38	PEA15
KIAA0090	PTCH2	RP1-39G22.4	MRPS14	LRRC40	PEAR1
KIAA0133	PTGFR	RP11-108M9.5	MRPS15	LRRC41	PEF1
KIAA0319L	PTGFRN	RP11-155O18.3	MRPS21	LRRC42	PEX10
KIAA0460	PTGS2	RP11-169K16.8	MRTO4	LRRC44	PEX11B
KIAA0467	PTP4A2	RP11-179G5.1	MSTO1	LRRC47	PEX14
KIAA0494	PTPN14	RP11-20O24.2	MTF1	LRRC7	PEX19
KIAA0562	PTPRF	RP11-216N14.5	MTF2	LRRC8B	PFDN2
KIAA0859	PTPRU	RP11-235D19.2	MTHFR	LRRC8C	PFKFB2
KIAA0907	PUM1	RP11-269F19.4	MTMR11	LRRC8D	PGBD2
KIAA1324	PUSL1	RP11-275I14.2	MTR	LRRN2	PGBD5
KIAA1383	PYCR2	RP11-305E17.4	MTX1	LSM10	PGD
KIAA1522	PYGO2	RP11-323K10.1	MUC1	LUZP1	PGM1
KIAA1614	QSOX1	RP11-325P15.2	MUTYH	LYPLA2	PHACTR4
KIAA1751	RAB13	RP11-336K24.9	MXRA8	LYPLAL1	PHC2
KIAA2013	RAB3GAP2	RP11-337C18.7	MYCBP	LYSMD1	PHF13
KIF14	RAB42	RP11-345I18.1	MYCL1	LYST	PHGDH
KIF17	RAB4A	RP11-348H3.2	MYSM1	LZIC	PHLDA3
KIF1B	RAB7L1	RP11-348H3.4	NADK	MACF1	PHTF1
KIF21B	RABGAP1L	RP11-348H3.5	NASP	MAD2L2	PI4KB
KIF26B	RABGGTB	RP11-365D23.1	NAV1	MAGI3	PIAS3
KIF2C	RABIF	RP11-378J18.6	NBL1	MAGOH	PIGC
KIFAP3	RAD54L	RP11-423O2.3	NBPF15	MAN1A2	PIGK
KIRREL	RAG1AP1	RP11-430L17.1	NBPF3	MAN1C1	PIGM
KLHDC9	RALGPS2	RP11-435P24.2	NCDN	MANEAL	PIGV
KLHL12	RAP1A	RP11-438H8.3	NCSTN	MAP3K19	PIK3C2B
KLHL17	RAP1GAP	RP11-465N4.2	NDUFS2	MAP3K6	PIK3R3
KLHL20	RASAL2	RP11-478H16.1	NDUFS5	MAP7D1	PINK1
KLHL21	RAVER2	RP11-480I12.6	NECAP2	MAPKAPK2	PIP5K1A
KPNA6	RBBP4	RP11-488L18.4	NEGR1	MARCKSL1	PKLR
KRTCAP2	RBBP5	RP11-488L18.5	NEK2	MARK1	PKN2
KTI12	RBM15	RP11-4K3__A.5	NEK7	MAST2	PLA2G4A
L1TD1	RBM34	RP11-504P24.2	NENF	MATN1	PLEKHM2
LAD1	RBM8A	RP11-504P24.3	NES	MCL1	PLEKHN1
LAMC1	RBMXL1	RP11-510N19.3	NEXN	MCOLN2	PLEKHO1
LAMC2	RCAN3	RP11-513D4.1	NFASC	MCOLN3	PLK3
LASS2	RCC1	RP11-520H14.1	NFIA	MDM4	PLOD1
LBR	RCC2	RP11-54O7.10	NFYC	MECR	PLXNA2
LCK	RCOR3	RP11-57I17.2	NGF	MED18	PM20D1
LDLRAD2	RER1	RP11-5P18.1	NID1	MED8	PMF1
LDLRAP1	RERE	RP11-634B7.1	NIT1	MEF2D	PMVK
LEFTY1	RFWD2	RP11-68I18.1	NLRP3	MEGF6	PNRC2
LEFTY2	RGL1	RP11-690C23.3	NME7	MEX3A	POGK
LEMD1	RGS2	RP11-690C23.5	NMNAT1	MFAP2	POGZ
LEPR	RGS4	RP11-69E11.5	NMNAT2	MFN2	POLR3C
LEPRE1	RGS7	RP11-8J9.1	NOC2L	MFSD2	POLR3GL
LEPROT	RHCE	RP3-423B22.5	NOL9	MFSD4	POMGNT1
LGALS8	RHOC	RP4-604K5.1	NOS1AP	MGST3	POU2F1
LGR6	RIMS3	RP4-609E1.3	NOTCH2	MIA3	POU3F1
LGTN	RIPK5	RP4-631H13.4	NOTCH2NL	MIB2	PPAP2B
LHX4	RIT1	RP4-654H19.2	NPAL3	MIER1	PPCS
LHX8	RLF	RP4-672J20.2	NPHP4	MIXL1	PPFIA4
LHX9	RNASEL	RP4-680D5.3	NPL	MKNK1	PPIE
LIN28	RNF11	RP4-680D5.4	NPPB	MLLT11	PPIH
LIN9	RNF187	RP4-710M16.1	NPR1	MMACHC	PPM1J
LIX1L	RNF19B	RP4-788L13.1	NRAS	MMEL1	PPOX
LMNA	RNF2	RP5-1000E10.4	NRD1	MMP23B	PPP1R12B
LMO4	RNF220	RP5-1065J22.4	NSL1	MOBKL2C	PPP1R15B
LMOD1	RNPC3	RP5-1065J22.7	NSUN4	MORN1	PPP1R8
LMX1A	RNPEP	RP5-1077B9.4	NT5C1A	MOSC1	PPP2R5A
LOR	RNU105A	RP5-1160K1.1	NTNG1	MOSC2	PPT1
LPGAT1	RNU11	RP5-882O7.4	NTRK1	MOV10	PQLC2
LPHN2	RNU5E	RP5-891H21.1	NUAK2	MPL	PRCC
LRIG2	ROR1	RP5-924G13.2	NUCKS1	MPZ	PRDM2
LRP8	RP1-144C9.2	RP5-990P15.2	NUDC	MPZL1	PRDX1
LRRC38	RP1-21K4.1	RPAP2	NUF2	MR1	PRDX6
LRRC40	RP1-21O18.1	RPL11	NUP133	MRPL20	PRKAB2
LRRC41	RP1-39G22.4	RPL22	NVL	MRPL24	PRKACB
LRRC42	RP11-136B18.1	RPL5	OAZ3	MRPL37	PRMT6
LRRC44	RP11-155O18.3	RPS27	OBSCN	MRPL55	PRNPIP
LRRC47	RP11-179G5.1	RPS6KC1	ODF2L	MRPL9	PRPF3
LRRC7	RP11-20O24.2	RPS8	OLFM3	MRPS14	PRPF38A
LRRC8B	RP11-234N17.1	RRAGC	OLFML2B	MRPS15	PRPF38B
LRRC8C	RP11-25K21.5	RRP15	OLFML3	MRPS21	PRUNE
LRRC8D	RP11-263K19.9	RSBN1	OMA1	MRTO4	PSEN2
LRRN2	RP11-269F19.4	RTCD1	OPN3	MSTO1	PSMA5
LSM10	RP11-275I14.2	RWDD3	OR10J6P	MTF1	PSMB2
LUZP1	RP11-302M6.3	S100A1	ORC1L	MTF2	PSMB4
LYPLA2	RP11-305E17.4	S100A10	OSBPL9	MTHFR	PSMD4
LYPLAL1	RP11-325P15.2	S100A11	OTUD3	MTR	PSRC1
LYSMD1	RP11-336K24.9	S100A13	OTUD7B	MTX1	PTBP2
LYST	RP11-337C18.7	S100A14	PABPC4	MUC1	PTCH2
LZIC	RP11-345I18.1	S100A16	PADI1	MUTYH	PTGER3
MACF1	RP11-348H3.4	S100A5	PAFAH2	MXRA8	PTGFRN
MAD2L2	RP11-348H3.5	S100A6	PALMD	MYCBP	PTGS2
MAGI3	RP11-365D23.1	S100PBP	PANK4	MYCL1	PTP4A2
MAGOH	RP11-378J18.6	SAMD13	PAQR7	MYOM3	PTPN22
MAN1A2	RP11-423O2.3	SARS	PARK7	MYSM1	PTPN7
MAN1C1	RP11-430L17.1	SASS6	PARP1	NADK	PTPRC
MANEAL	RP11-465N4.2	SCAMP3	PARS2	NASP	PTPRF
MAP1LC3C	RP11-478H16.1	SCARNA1	PAX7	NAV1	PTPRU
MAP3K19	RP11-480I12.6	SCCPDH	PBX1	NBL1	PUM1
MAP3K6	RP11-488L18.4	SCMH1	PBXIP1	NBPF15	PUSL1
MAP7D1	RP11-4K3__A.5	SCNM1	PCNXL2	NBPF3	PYCR2
MAPKAPK2	RP11-504P24.2	SCP2	PCTK3	NCDN	PYGO2
MARCKSL1	RP11-504P24.3	SCYL1BP1	PDE4B	NCSTN	QSOX1
MARK1	RP11-520H14.1	SCYL3	PDE4DIP	NDUFS2	RAB13
MAST2	RP11-54B9.2	SDC3	PDIK1L	NDUFS5	RAB3GAP2
MATN1	RP11-68I18.1	SDCCAG8	PDPN	NECAP2	RAB4A
MCL1	RP11-69E11.5	SDF4	PEA15	NEGR1	RAB7L1
MCOLN2	RP11-72M14.1	SDHB	PEAR1	NEK2	RABGAP1L
MCOLN3	RP11-8J9.1	SDHC	PEF1	NEK7	RABGGTB
MDM4	RP3-423B22.5	SEC22B	PER3	NENF	RABIF
MECR	RP4-566D2.1	SEMA6C	PEX10	NES	RAD54L
MED18	RP4-604K5.1	SEPN1	PEX11B	NEXN	RAG1AP1
MED8	RP4-609E1.3	SERBP1	PEX14	NFASC	RALGPS2
MEF2D	RP4-621B10.3	SESN2	PEX19	NFIA	RAP1A
MEGF6	RP4-631H13.4	SETDB1	PFDN2	NFYC	RAP1GAP
MEX3A	RP4-631H13.6	SF3A3	PFKFB2	NGF	RASAL2
MFAP2	RP4-654H19.2	SF3B4	PGBD2	NHLH2	RASSF5
MFN2	RP4-672J20.2	SFPQ	PGBD5	NID1	RAVER2
MFSD2	RP4-680D5.3	SFRS11	PGD	NIT1	RBBP4
MFSD4	RP4-680D5.4	SFRS4	PGM1	NKAIN1	RBBP5
MGST3	RP4-700A9.1	SFT2D2	PHACTR4	NLRP3	RBM15
MIA3	RP4-706L14.2	SGIP1	PHC2	NME7	RBM34
MIB2	RP4-733M16.7	SH3BGRL3	PHF13	NMNAT1	RBM8A
MIER1	RP4-735C1.5	SH3BP5L	PHGDH	NOC2L	RBMXL1
MIXL1	RP4-788L13.1	SH3GLB1	PHLDA3	NOL9	RCAN3
MKNK1	RP5-1000E10.4	SHC1	PHTF1	NOS1AP	RCC1
MLLT11	RP5-1065J22.4	SKI	PI4KB	NOTCH2	RCC2
MMACHC	RP5-1065J22.7	SLC16A1	PIAS3	NOTCH2NL	RCOR3
MMEL1	RP5-1077B9.4	SLC19A2	PIGC	NPAL3	RCSD1
MMP23B	RP5-1160K1.1	SLC22A15	PIGK	NPHP4	RER1
MOBKL2C	RP5-882O7.4	SLC25A24	PIGM	NPHS2	RERE
MORN1	RP5-890O3.3	SLC25A33	PIGV	NPL	RFWD2
MOSC1	RP5-924G13.2	SLC25A44	PIK3C2B	NPR1	RFX5
MOSC2	RP5-990P15.2	SLC2A1	PIK3R3	NR5A2	RGL1
MOV10	RPA2	SLC30A1	PINK1	NRAS	RGS16
MPZ	RPAP2	SLC30A7	PIP5K1A	NRD1	RGS2
MPZL1	RPL11	SLC35A3	PKN2	NSL1	RHCE
MRPL20	RPL22	SLC35D1	PLA2G2E	NSUN4	RHOC
MRPL24	RPL5	SLC39A1	PLA2G4A	NT5C1A	RHOU
MRPL37	RPS27	SLC41A1	PLD5	NTNG1	RIMS3
MRPL55	RPS6KC1	SLC6A9	PLEKHA6	NTRK1	RIPK5
MRPL9	RPS8	SLC9A1	PLEKHG5	NUAK2	RIT1
MRPS14	RRAGC	SMAP2	PLEKHM2	NUCKS1	RLF
MRPS15	RRP15	SMG5	PLEKHO1	NUDC	RNASEL
MRPS21	RSBN1	SMG7	PLK3	NUDT17	RNF11
MRTO4	RTCD1	SMYD2	PLOD1	NUF2	RNF187
MSTO1	RUSC1	SMYD3	PLXNA2	NUP133	RNF19B
MTF1	RWDD3	SNAPIN	PMF1	NVL	RNF2
MTF2	S100A1	SNFT	PMVK	OAZ3	RNF207
MTHFR	S100A10	SNIP1	PNRC2	OBSCN	RNF220
MTMR11	S100A11	SNORA14B	POGK	ODF2L	RNPC3
MTR	S100A13	SNORA16A	POGZ	OLFML2B	RNPEP
MTX1	S100A14	SNORA44	POLR3C	OMA1	RNU105A
MUC1	S100A16	SNORA61	POLR3GL	OPN3	RNU11
MUTYH	S100A3	SNORA73A	POMGNT1	OPRD1	RNU5E
MXRA8	S100A4	SNORD21	POU2F1	OR2AJ1	RP1-144C9.2
MYCBP	S100A5	SNORD38A	PPAP2B	OR2L13	RP1-21K4.1
MYCL1	S100A6	SNORD38B	PPAPR5	OR2W5	RP1-21O18.1
MYOM3	S100PBP	SNORD44	PPCS	ORC1L	RP1-313L4.4
MYSM1	SAMD13	SNORD45A	PPFIA4	OSBPL9	RP1-39G22.4
NADK	SARS	SNORD45B	PPIE	OTUD3	RP11-108M9.5
NASP	SASS6	SNORD45C	PPIH	OTUD7B	RP11-155O18.3
NAV1	SCAMP3	SNORD46	PPM1J	PABPC4	RP11-179G5.1
NBL1	SCARNA1	SNORD47	PPOX	PADI2	RP11-181E22.1
NBPF11	SCCPDH	SNORD55	PPP1R12B	PAFAH2	RP11-20O24.2
NBPF15	SCMH1	SNORD74	PPP1R15B	PANK4	RP11-235D19.2
NBPF3	SCNM1	SNORD75	PPP1R8	PAQR6	RP11-263K19.9
NBPF9	SCP2	SNORD76	PPP2R5A	PAQR7	RP11-269F19.4
NCDN	SCYL1BP1	SNORD77	PPT1	PARK7	RP11-275I14.2
NCSTN	SCYL3	SNORD78	PQLC2	PARP1	RP11-302M6.3
NDUFS2	SDC3	SNORD79	PRCC	PARS2	RP11-305E17.4
NDUFS5	SDCCAG8	SNORD80	PRDM16	PBX1	RP11-325P15.2
NECAP2	SDF4	SNORD81	PRDM2	PBXIP1	RP11-336K24.9
NEGR1	SDHB	SNORD99	PRDX1	PCNXL2	RP11-337C18.7
NEK2	SDHC	SNRPE	PRDX6	PCP4L1	RP11-348H3.4
NEK7	SEC22B	SNX27	PRKAA2	PCSK9	RP11-348H3.5
NENF	SEMA6C	SNX7	PRKAB2	PCTK3	RP11-365D23.1
NES	SEPN1	SORT1	PRKACB	PDE4B	RP11-378J18.6
NEXN	SERBP1	SOX13	PRKCZ	PDE4DIP	RP11-38O14.6
NFASC	SESN2	SPATA1	PRMT6	PDIK1L	RP11-404O13.2
NFIA	SF3A3	SPATA17	PRNPIP	PEA15	RP11-430L17.1
NFYC	SF3B4	SPATA21	PROX1	PEAR1	RP11-434N15.1
NGF	SFN	SPATA6	PRPF3	PEF1	RP11-438H8.8
NHLH2	SFPQ	SPEN	PRPF38A	PER3	RP11-438H8.9
NID1	SFRS11	SPOCD1	PRPF38B	PEX10	RP11-465N4.2
NIT1	SFRS4	SPSB1	PRRX1	PEX11B	RP11-478H16.1
NKAIN1	SFT2D2	SRM	PRUNE	PEX14	RP11-480I12.6
NME7	SGIP1	SRP9	PSEN2	PEX19	RP11-488L18.4
NMNAT1	SH2D5	SRRM1	PSMA5	PFDN2	RP11-488L18.5
NMNAT2	SH3BGRL3	SSBP3	PSMB2	PFKFB2	RP11-495P10.4
NOC2L	SH3BP5L	SSU72	PSMB4	PGBD2	RP11-4K3__A.5
NOL9	SH3GLB1	SSX2IP	PSMD4	PGBD5	RP11-504P24.2
NOS1AP	SHC1	ST3GAL3	PSRC1	PGD	RP11-504P24.3
NOTCH2	SKI	ST7L	PTBP2	PGM1	RP11-505O17.1
NOTCH2NL	SLC16A1	STIL	PTCHD2	PHACTR4	RP11-520H14.1
NPAL3	SLC19A2	STK40	PTGER3	PHC2	RP11-544M22.3
NPHP4	SLC22A15	STMN1	PTGFR	PHF13	RP11-544M22.4
NPHS2	SLC25A24	STX6	PTGFRN	PHGDH	RP11-54O7.10
NPL	SLC25A33	STXBP3	PTGS2	PHLDA3	RP11-553K8.3
NPPB	SLC25A44	SV2A	PTP4A2	PHTF1	RP11-564A8.4
NPR1	SLC2A1	SYDE2	PTPN14	PI4KB	RP11-57I17.2
NR5A2	SLC30A1	SYF2	PTPRF	PIAS3	RP11-5K23.3
NRAS	SLC30A7	SYT11	PTPRU	PIGC	RP11-68I18.1
NRD1	SLC35A3	TADA1L	PUM1	PIGK	RP11-69E11.5
NSL1	SLC35D1	TAF12	PUSL1	PIGM	RP11-6B6.3
NSUN4	SLC39A1	TAF13	PYCR2	PIGV	RP11-72M14.1
NT5C1A	SLC41A1	TAF1A	PYGO2	PIK3C2B	RP11-8J9.1
NTNG1	SLC44A5	TAF5L	QSOX1	PIK3CD	RP11-98D18.7
NTRK1	SLC45A3	TAGLN2	RAB13	PIK3R3	RP3-423B22.5
NUAK2	SLC6A9	TARBP1	RAB3B	PINK1	RP4-604K5.1
NUCKS1	SLC9A1	TARDBP	RAB3GAP2	PIP5K1A	RP4-621B10.3
NUDC	SMAP2	TARS2	RAB4A	PKN2	RP4-631H13.4
NUDT17	SMG5	TAS1R1	RAB7L1	PKP1	RP4-631H13.6
NUF2	SMG7	TATDN3	RABGAP1L	PLA2G4A	RP4-635A23.4
NUP133	SMYD2	TBCE	RABGGTB	PLD5	RP4-654H19.2
NVL	SMYD3	TBX15	RABIF	PLEKHG5	RP4-665N4.5
OAZ3	SNAPIN	TCEB3	RAD54L	PLEKHM2	RP4-680D5.3
OBSCN	SNFT	TCTEX1D4	RAG1AP1	PLEKHN1	RP4-680D5.4
ODF2L	SNIP1	TDRKH	RALGPS2	PLEKHO1	RP4-700A9.1
OLFM3	SNORA14B	TESK2	RAP1A	PLK3	RP4-706L14.2
OLFML2B	SNORA16A	TFAP2E	RAP1GAP	PLOD1	RP4-733M16.7
OLFML3	SNORA44	TFB2M	RASAL2	PLXNA2	RP5-1000E10.4
OMA1	SNORA61	TGFB2	RASSF5	PM20D1	RP5-1065J22.4
OPN3	SNORA73A	TGFBR3	RAVER2	PMF1	RP5-1065J22.7
OPRD1	SNORD21	THAP3	RBBP4	PMVK	RP5-1077B9.4
OR2B11	SNORD38A	THBS3	RBBP5	PNRC2	RP5-1160K1.1
OR2W3	SNORD38B	THEM4	RBM15	PODN	RP5-882O7.4
ORC1L	SNORD44	THRAP3	RBM34	POGK	RP5-890O3.3
OSBPL9	SNORD45A	TIMM17A	RBM8A	POGZ	RP5-915N17.3
OTUD3	SNORD45B	TINAGL1	RBMXL1	POLR3C	RP5-924G13.2
OTUD7B	SNORD45C	TIPRL	RCAN3	POLR3GL	RP5-930J4.5
OXCT2	SNORD46	TLR5	RCC1	POMGNT1	RP5-990P15.2
PABPC4	SNORD47	TM2D1	RCC2	POU2F1	RP6-74O6.1
PADI2	SNORD55	TMCO1	RCOR3	POU3F1	RPA2
PAFAH2	SNORD74	TMCO4	RER1	PPAP2B	RPAP2
PANK4	SNORD75	TMED5	RERE	PPAPR5	RPL11
PAQR7	SNORD76	TMEM183A	RFWD2	PPCS	RPL22
PARK7	SNORD77	TMEM201	RFX5	PPFIA4	RPL5
PARP1	SNORD78	TMEM39B	RGL1	PPIE	RPS27
PARS2	SNORD79	TMEM48	RGS16	PPIH	RPS6KA1
PAX7	SNORD80	TMEM50A	RGS2	PPM1J	RPS6KC1
PBX1	SNORD81	TMEM51	RGS4	PPOX	RPS8
PBXIP1	SNORD99	TMEM53	RGS5	PPP1R12B	RRAGC
PCNXL2	SNRPE	TMEM56	RGS7	PPP1R15B	RRP15
PCP4L1	SNX27	TMEM57	RHCE	PPP1R8	RSBN1
PCSK9	SNX7	TMEM59	RHD	PPP2R5A	RTCD1
PCTK3	SOAT1	TMEM63A	RHOC	PPT1	RUNX3
PDE4B	SORT1	TMEM69	RHOU	PQLC2	RUSC1
PDE4DIP	SOX13	TMEM77	RIMS3	PRCC	RWDD3
PDIK1L	SPATA1	TMEM79	RIPK5	PRDM16	S100A10
PDPN	SPATA17	TMEM9	RIT1	PRDM2	S100A11
PDZK1P1	SPATA21	TNFRSF14	RLF	PRDX1	S100A13
PEA15	SPATA6	TNNI3K	RNASEL	PRDX6	S100A3
PEAR1	SPEN	TNRC4	RNF11	PRKAA2	S100A4
PEF1	SPOCD1	TOE1	RNF187	PRKAB2	S100A5
PER3	SPSB1	TOMM20	RNF19B	PRKACB	S100A6
PEX10	SRM	TOMM40L	RNF2	PRKCZ	S100PBP
PEX11B	SRP9	TOR1AIP1	RNF207	PRMT6	SAMD13
PEX14	SRRM1	TOR1AIP2	RNF220	PRNPIP	SARS
PEX19	SSBP3	TOR3A	RNPC3	PROX1	SASS6
PFDN2	SSR2	TP53BP2	RNPEP	PRPF3	SCAMP3
PFKFB2	SSU72	TP73	RNU105A	PRPF38A	SCARNA1
PGBD2	SSX2IP	TPM3	RNU11	PRPF38B	SCCPDH
PGBD5	ST3GAL3	TPR	RNU1A	PRRX1	SCMH1
PGD	ST6GALNAC5	TPRG1L	RNU5E	PRUNE	SCNM1
PGM1	ST7L	TRAF5	ROR1	PSEN2	SCNN1D
PHACTR4	STIL	TRAPPC3	RP1-144C9.2	PSMA5	SCP2
PHC2	STK40	TRIM11	RP1-21K4.1	PSMB2	SCYL1BP1
PHF13	STMN1	TRIM33	RP1-21O18.1	PSMB4	SCYL3
PHGDH	STX12	TRIM45	RP1-313L4.4	PSMD4	SDCCAG8
PHLDA3	STX6	TRIM46	RP1-39G22.4	PSRC1	SDF4
PHTF1	STXBP3	TRIM62	RP11-115M14.1	PTBP2	SDHB
PI4KB	SYDE2	TRIM63	RP11-115P16.1	PTCH2	SDHC
PIAS3	SYF2	TRIT1	RP11-14N7.3	PTCHD2	SEC22B
PIGC	SYT11	TROVE2	RP11-155O18.3	PTGER3	SELENBP1
PIGK	SYT14	TRSPAP1	RP11-164O23.5	PTGFR	SEMA6C
PIGM	TADA1L	TSNAX	RP11-169K16.6	PTGFRN	SEPN1
PIGV	TAF12	TTC13	RP11-169K16.8	PTGS2	SERBP1
PIK3C2B	TAF13	TTC4	RP11-179G5.1	PTP4A2	SERINC2
PIK3CD	TAF1A	TTF2	RP11-185B14.1	PTPN14	SESN2
PIK3R3	TAF5L	TTLL7	RP11-20O24.2	PTPN7	SETDB1
PINK1	TAGLN2	TUFT1	RP11-234N17.1	PTPRC	SF3A3
PIP5K1A	TARBP1	TXLNA	RP11-235D19.2	PTPRF	SF3B4
PKN2	TARDBP	TXNDC12	RP11-25K21.5	PTPRU	SFN
PLA2G4A	TARS2	TXNIP	RP11-263K19.9	PUM1	SFPQ
PLD5	TAS1R1	TYW3	RP11-269F19.4	PUSL1	SFRS11
PLEKHA6	TATDN3	UAP1	RP11-275I14.2	PYCR2	SFRS4
PLEKHG5	TBCE	UBAP2L	RP11-296O14.1	PYGO2	SFT2D2
PLEKHM2	TBX15	UBE2Q1	RP11-301M17.1	QSOX1	SH2D2A
PLEKHN1	TCEB3	UBE2T	RP11-302M6.3	RAB13	SH3BGRL3
PLEKHO1	TCHH	UBE4B	RP11-305E17.4	RAB3B	SH3BP5L
PLK3	TCTEX1D4	UBIAD1	RP11-318L16.4	RAB3GAP2	SH3GLB1
PLOD1	TDRKH	UBQLN4	RP11-329A14.2	RAB42	SHC1
PLXNA2	TEDDM1	UBR4	RP11-336K24.9	RAB4A	SKI
PMF1	TESK2	UCHL5	RP11-337C18.7	RAB7L1	SLAMF9
PMVK	TFB2M	UCK2	RP11-345I18.1	RABGAP1L	SLC16A1
PNRC2	TGFB2	UFC1	RP11-348H3.4	RABGGTB	SLC19A2
PODN	TGFBR3	UHMK1	RP11-348H3.5	RABIF	SLC22A15
POGK	THAP3	UQCRH	RP11-350G8.7	RAD54L	SLC25A24
POGZ	THBS3	UROD	RP11-358H9.2	RAG1AP1	SLC25A33
POLR3C	THEM4	USF1	RP11-365D23.1	RALGPS2	SLC25A44
POLR3GL	THRAP3	USP1	RP11-378J18.6	RAP1A	SLC27A3
POMGNT1	TIMM17A	USP21	RP11-38O14.6	RAP1GAP	SLC2A1
POU2F1	TINAGL1	USP24	RP11-393N21.1	RASAL2	SLC30A1
POU3F1	TIPRL	USP33	RP11-404O13.2	RASSF5	SLC30A10
PPAP2B	TLR5	USP48	RP11-423F24.3	RAVER2	SLC30A2
PPAPR5	TM2D1	UTP11L	RP11-426M1.2	RBBP4	SLC30A7
PPCS	TMCC2	VAMP3	RP11-430L17.1	RBBP5	SLC35A3
PPFIA4	TMCO1	VAMP4	RP11-465N4.2	RBM15	SLC35D1
PPIE	TMED5	VANGL1	RP11-467I20.5	RBM34	SLC35E2
PPIH	TMEM183A	VAV3	RP11-478H16.1	RBM8A	SLC39A1
PPM1J	TMEM201	VHLL	RP11-480I12.6	RBMXL1	SLC41A1
PPOX	TMEM39B	VPS13D	RP11-488L18.4	RBP7	SLC45A3
PPP1R12B	TMEM48	VPS45	RP11-492M19.3	RCAN3	SLC6A9
PPP1R15B	TMEM50A	VPS72	RP11-4K3__A.5	RCC1	SLC9A1
PPP1R8	TMEM51	WARS2	RP11-504P24.2	RCC2	SMAP2
PPP2R5A	TMEM53	WASF2	RP11-504P24.3	RCOR3	SMG5
PPT1	TMEM56	WDR26	RP11-520H14.1	RCSD1	SMG7
PQLC2	TMEM57	WDR3	RP11-544M22.3	RER1	SMPDL3B
PRCC	TMEM58	WDR42A	RP11-544M22.4	RERE	SMYD2
PRDM16	TMEM59	WDR47	RP11-54O7.10	RFWD2	SMYD3
PRDM2	TMEM63A	WDR57	RP11-564A8.4	RFX5	SNAPIN
PRDX1	TMEM69	WDR63	RP11-5K23.3	RGL1	SNIP1
PRDX6	TMEM77	WDR65	RP11-68I18.1	RGS16	SNORA14B
PRKAA2	TMEM79	WDR77	RP11-69E11.5	RGS18	SNORA16A
PRKAB2	TMEM9	WDR78	RP11-6B6.3	RGS2	SNORA44
PRKACB	TNFRSF14	WDR8	RP11-710N8.2	RGS7	SNORA61
PRKCZ	TNNI3K	WDTC1	RP11-72M14.1	RHBG	SNORA73A
PRMT6	TOE1	XPR1	RP11-763B22.7	RHCE	SNORD21
PRNPIP	TOMM20	XX-CR54.2	RP11-80B9.2	RHOC	SNORD38A
PROX1	TOMM40L	YARS	RP11-8J9.1	RHOU	SNORD38B
PRPF3	TOR1AIP1	YBX1	RP11-98D18.7	RIMS3	SNORD44
PRPF38A	TOR1AIP2	YIPF1	RP3-342P20.2	RIPK5	SNORD45A
PRPF38B	TOR3A	YOD1	RP3-423B22.5	RIT1	SNORD45B
PRRX1	TP53BP2	YRDC	RP4-604K5.1	RLF	SNORD45C
PRUNE	TP73	YTHDF2	RP4-609E1.3	RNASEL	SNORD46
PSEN2	TPM3	Z99127.2	RP4-621B10.3	RNF11	SNORD47
PSMA5	TPR	Z99297.1	RP4-631H13.4	RNF187	SNORD55
PSMB2	TPRG1L	Z99572.1	RP4-654H19.2	RNF19B	SNORD74
PSMB4	TRAF5	ZBTB17	RP4-663N10.2	RNF2	SNORD75
PSMD4	TRAPPC3	ZBTB37	RP4-672J20.2	RNF207	SNORD76
PSRC1	TRIM11	ZBTB40	RP4-675G8.3	RNF220	SNORD77
PTBP2	TRIM33	ZBTB41	RP4-675G8.4	RNPC3	SNORD78
PTCH2	TRIM46	ZBTB7B	RP4-680D5.3	RNPEP	SNORD79
PTCHD2	TRIT1	ZBTB8OS	RP4-680D5.4	RNU105A	SNORD80
PTGER3	TROVE2	ZC3H11A	RP4-683M8.1	RNU11	SNORD81
PTGFR	TRSPAP1	ZC3H12A	RP4-700A9.1	RNU1A	SNORD99
PTGFRN	TSNAX	ZCCHC11	RP4-706L14.2	RNU5E	SNRPE
PTGS2	TTC13	ZCCHC17	RP4-733M16.7	ROR1	SNX27
PTP4A2	TTC4	ZFYVE9	RP4-735C1.5	RP1-144C9.2	SOAT1
PTPN14	TTF2	ZMPSTE24	RP4-788L13.1	RP1-21K4.1	SORT1
PTPRF	TUFT1	ZMYM1	RP4-796F18.2	RP1-21O18.1	SOX13
PTPRU	TXLNA	ZMYM4	RP4-803A2.2	RP1-39G22.4	SPAG17
PUM1	TXNDC12	ZMYM6	RP5-1000E10.4	RP11-100E13.3	SPATA1
PUSL1	TXNIP	ZMYND12	RP5-1033K19.2	RP11-108M9.5	SPATA17
PYCR2	TYW3	ZNF124	RP5-1065J22.4	RP11-14N7.3	SPATA21
PYGO2	UAP1	ZNF238	RP5-1065J22.7	RP11-155O18.3	SPATA6
QSOX1	UBAP2L	ZNF281	RP5-1077B9.4	RP11-179G5.1	SPEN
RAB13	UBE2J2	ZNF364	RP5-1087E8.2	RP11-181E22.1	SPSB1
RAB25	UBE2Q1	ZNF436	RP5-1160K1.1	RP11-20O24.2	SPTA1
RAB3B	UBE2T	ZNF496	RP5-866L20.3	RP11-234N17.1	SRM
RAB3GAP2	UBE4B	ZNF593	RP5-881P19.6	RP11-235D19.2	SRP9
RAB42	UBIAD1	ZNF642	RP5-882O7.4	RP11-263K19.9	SRRM1
RAB4A	UBQLN4	ZNF643	RP5-882O7.5	RP11-269F19.4	SSBP3
RAB7L1	UBR4	ZNF644	RP5-890O3.3	RP11-275I14.2	SSR2
RABGAP1L	UBXD5	ZNF669	RP5-924G13.2	RP11-293F5.2	SSU72
RABGGTB	UCHL5	ZNF670	RP5-930J4.5	RP11-301M17.1	SSX2IP
RABIF	UCK2	ZNF672	RP5-964H19.1	RP11-302M6.3	ST3GAL3
RAD54L	UFC1	ZNF678	RP5-990P15.2	RP11-305E17.4	ST6GALNAC3
RAG1AP1	UHMK1	ZNF684	RPA2	RP11-323D18.4	ST7L
RALGPS2	UQCRH	ZNF687	RPAP2	RP11-325P15.2	STIL
RAP1A	UROD	ZNF691	RPL11	RP11-336K24.9	STK40
RAP1GAP	USF1	ZNF692	RPL22	RP11-337C18.7	STMN1
RASAL2	USP1	ZRANB2	RPL5	RP11-348H3.4	STX12
RASSF5	USP21	ZSCAN20	RPS27	RP11-348H3.5	STX6
RAVER2	USP24	ZSWIM5	RPS6KA1	RP11-358H9.2	STXBP3
RBBP4	USP33	ZYG11B	RPS6KC1	RP11-365D23.1	SYDE2
RBBP5	USP48	ZZZ3	RPS8	RP11-378J18.6	SYF2
RBM15	UTP11L	ABLIM1	RRAGC	RP11-385M4.3	SYT11
RBM34	VAMP3	AC016542.11	RRP15	RP11-404O13.2	SYTL1
RBM8A	VAMP4	AC022015.6	RSBN1	RP11-430L17.1	TADA1L
RBMXL1	VANGL1	AC022532.13	RTCD1	RP11-438H8.8	TAF12
RBP7	VASH2	AC023283.10	RUNX3	RP11-438H8.9	TAF13
RCAN3	VAV3	AC024597.8	RUSC1	RP11-465N4.2	TAF1A
RCC1	VHLL	AC073585.8	RWDD3	RP11-478H16.1	TAF5L
RCC2	VPS13D	ACADSB	RXRG	RP11-480I12.6	TAGLN2
RCOR3	VPS45	ACBD5	RYR2	RP11-488L18.4	TAL1
RCSD1	VPS72	ACBD7	S100A1	RP11-488L18.5	TARBP1
RER1	WARS2	ACTA2	S100A10	RP11-492I2.1	TARDBP
RERE	WASF2	ACTR1A	S100A11	RP11-495P10.4	TARS2
RFWD2	WDR26	ADAM12	S100A13	RP11-4K3__A.5	TAS1R1
RFX5	WDR3	ADD3	S100A14	RP11-4M23.2	TATDN3
RGL1	WDR42A	ADK	S100A16	RP11-504P24.2	TBCE
RGS16	WDR47	AFDC1	S100A2	RP11-504P24.3	TCEB3
RGS2	WDR57	AIFM2	S100A3	RP11-505O17.1	TCHH
RGS7	WDR65	AKR1C3	S100A4	RP11-520H14.1	TCTEX1D1
RHBG	WDR77	AL031601.3	S100A5	RP11-544M22.3	TCTEX1D4
RHCE	WDR78	AL031601.4	S100A6	RP11-544M22.4	TDRKH
RHD	WDR8	AL121928.13	S100PBP	RP11-545A16.3	TEKT2
RHOC	WDTC1	AL138921.14	SAMD11	RP11-54O7.10	TESK2
RHOU	WNT2B	AL139123.15	SAMD13	RP11-564A8.4	TFAP2E
RIMS3	XKR8	AL157395.17	SARS	RP11-57I17.2	TFB2M
RIPK5	XPR1	AL157400.8	SASS6	RP11-5K23.3	TGFB2
RIT1	YARS	AL157895.8	SCAMP3	RP11-68I18.1	TGFBR3
RLF	YBX1	AL158163.11	SCARNA1	RP11-69E11.5	THAP3
RN5S1	YIPF1	AL161932.15	SCCPDH	RP11-6B6.3	THBS3
RN5S9	YOD1	AL161936.15	SCMH1	RP11-763B22.7	THEM4
RNASEL	YRDC	AL162272.10	SCNM1	RP11-8J9.1	THRAP3
RNF11	YTHDF2	AL162502.17	SCNN1D	RP11-98D18.7	TIMM17A
RNF187	YY1AP1	AL354951.7	SCP2	RP3-423B22.5	TIPRL
RNF19B	Z99127.2	AL355355.25	SCYL1BP1	RP4-604K5.1	TLR5
RNF2	Z99297.1	AL355490.24	SCYL3	RP4-609E1.3	TM2D1
RNF207	Z99572.1	AL355861.19	SDC3	RP4-621B10.3	TMCC2
RNF220	ZBTB17	AL359385.28	SDCCAG8	RP4-631H13.4	TMCO1
RNPC3	ZBTB37	AL359844.15	SDF4	RP4-631H13.6	TMCO4
RNPEP	ZBTB40	AL359878.13	SDHB	RP4-644F6.3	TMED5
RNU105A	ZBTB41	AL365356.13	SDHC	RP4-654H19.2	TMEM183A
RNU11	ZBTB48	AL365434.13	SEC22B	RP4-665N4.5	TMEM200B
RNU1A	ZBTB7B	AL391421.27	SELL	RP4-669K10.3	TMEM201
RNU5E	ZBTB8	AL391427.9	SEMA6C	RP4-672J20.2	TMEM206
ROR1	ZBTB8OS	AL450326.30	SEPN1	RP4-680D5.3	TMEM39B
RP1-144C9.2	ZC3H11A	AL512631.11	SERBP1	RP4-680D5.4	TMEM48
RP1-21K4.1	ZC3H12A	AL512662.8	SERINC2	RP4-683M8.1	TMEM50A
RP1-21O18.1	ZCCHC11	AL591408.19	SERTAD4	RP4-700A9.1	TMEM51
RP1-39G22.4	ZCCHC17	AL607035.12	SESN2	RP4-706L14.2	TMEM52
RP11-108M9.5	ZDHHC18	AL731543.9	SETDB1	RP4-733M16.7	TMEM53
RP11-14N7.3	ZFYVE9	ALDH18A1	SF3A3	RP4-788L13.1	TMEM56
RP11-155O18.3	ZMPSTE24	ANK3	SF3B4	RP4-796F18.2	TMEM57
RP11-179G5.1	ZMYM1	ANKRD1	SFN	RP5-1000E10.4	TMEM58
RP11-20O24.2	ZMYM4	ANKRD16	SFPQ	RP5-1065J22.4	TMEM59
RP11-234N17.1	ZMYM6	ANKRD26	SFRS11	RP5-1065J22.7	TMEM63A
RP11-235D19.2	ZMYND12	ANUBL1	SFRS4	RP5-1077B9.4	TMEM69
RP11-25K21.5	ZNF238	ANXA11	SFT2D2	RP5-1155K23.1	TMEM77
RP11-263K19.9	ZNF281	ANXA7	SH2D5	RP5-1160K1.1	TMEM79
RP11-269F19.4	ZNF326	AP3M1	SH3BGRL3	RP5-866L20.3	TMEM9
RP11-275I14.2	ZNF364	ARHGAP12	SH3BP5L	RP5-882O7.1	TNFAIP8L2
RP11-284L19.1	ZNF436	ARHGAP19	SH3GLB1	RP5-882O7.4	TNFRSF14
RP11-289I10.2	ZNF496	ARHGAP21	SHC1	RP5-890O3.3	TNFRSF1B
RP11-293F5.2	ZNF593	ARHGAP22	SKI	RP5-915N17.3	TNNI3K
RP11-293F5.4	ZNF642	ARID5B	SLAMF7	RP5-924G13.2	TOE1
RP11-301M17.1	ZNF643	ARL3	SLAMF9	RP5-930J4.5	TOMM20
RP11-302M6.3	ZNF644	ARL5B	SLC16A1	RP5-990P15.2	TOMM40L
RP11-305E17.4	ZNF669	ARMC4	SLC19A2	RP6-74O6.1	TOR1AIP1
RP11-318L16.4	ZNF670	ARMETL1	SLC22A15	RPA2	TOR1AIP2
RP11-325P15.2	ZNF672	ASAH2B	SLC25A24	RPAP2	TOR3A
RP11-32D17.4	ZNF678	ASB13	SLC25A33	RPL11	TP53BP2
RP11-331H2.4	ZNF684	ASCC1	SLC25A44	RPL22	TP73
RP11-336K24.9	ZNF687	ATE1	SLC27A3	RPL5	TPM3
RP11-337C18.7	ZNF691	ATP5C1	SLC2A1	RPS27	TPR
RP11-345I18.1	ZNF692	ATRNL1	SLC30A1	RPS6KA1	TPRG1L
RP11-348H3.4	ZRANB2	AVPI1	SLC30A7	RPS6KC1	TRAF5
RP11-348H3.5	ZSCAN20	BAG3	SLC35A3	RPS8	TRAPPC3
RP11-358H9.2	ZSWIM5	BAMBI	SLC35D1	RRAGC	TRIM11
RP11-365D23.1	ZYG11B	BCCIP	SLC35F3	RRP15	TRIM17
RP11-378J18.6	ZZZ3	BICC1	SLC39A1	RSBN1	TRIM33
RP11-404O13.2	ABLIM1	BLOC1S2	SLC41A1	RTCD1	TRIM45
RP11-404O13.4	AC016542.11	BMI1	SLC44A3	RUNX3	TRIM46
RP11-426M1.2	AC022532.13	BMPR1A	SLC44A5	RUSC1	TRIM58
RP11-430L17.1	AC023283.10	BMS1	SLC45A3	RWDD3	TRIM62
RP11-454G24.1	AC073370.7	BMS1LP4	SLC6A9	RXRG	TRIM67
RP11-459K23.1	AC073585.8	BNIP3	SLC9A1	RYR2	TRIT1
RP11-465N4.2	ACADSB	BTAF1	SMAP2	S100A10	TROVE2
RP11-478H16.1	ACBD5	BTRC	SMG5	S100A11	TRSPAP1
RP11-480I12.6	ACTA2	BUB3	SMG7	S100A13	TSNAX
RP11-488L18.4	ACTR1A	C10orf10	SMPDL3B	S100A3	TSPAN2
RP11-488L18.5	ADAM12	C10orf103	SMYD2	S100A4	TTC13
RP11-488L18.6	ADAMTS14	C10orf104	SMYD3	S100A5	TTC4
RP11-495P10.4	ADD3	C10orf11	SNAPIN	S100A6	TTF2
RP11-4K3__A.5	ADK	C10orf111	SNFT	S100PBP	TTLL7
RP11-4M23.2	ADRA2A	C10orf114	SNIP1	SAMD11	TUFT1
RP11-504P24.2	AFDC1	C10orf116	SNORA14B	SAMD13	TXLNA
RP11-504P24.3	AIFM2	C10orf118	SNORA16A	SARS	TXNDC12
RP11-520H14.1	AKR1C3	C10orf119	SNORA44	SASS6	TXNIP
RP11-544M22.3	AL031601.4	C10orf131	SNORA61	SCAMP3	TYW3
RP11-544M22.4	AL121928.13	C10orf137	SNORA66	SCARNA1	UAP1
RP11-545A16.3	AL136368.24	C10orf140	SNORA73A	SCCPDH	UBAP2L
RP11-54O7.10	AL138921.14	C10orf18	SNORD21	SCMH1	UBE2J2
RP11-564A8.4	AL139123.15	C10orf22	SNORD38A	SCNM1	UBE2Q1
RP11-5K23.3	AL139406.14	C10orf25	SNORD38B	SCNN1D	UBE2T
RP11-64I24.2	AL157395.17	C10orf26	SNORD44	SCP2	UBE4B
RP11-666A1.3	AL157400.8	C10orf28	SNORD45A	SCYL1BP1	UBIAD1
RP11-68I18.1	AL158163.11	C10orf30	SNORD45B	SCYL3	UBQLN4
RP11-69E11.5	AL161932.15	C10orf32	SNORD45C	SDC3	UBR4
RP11-69E11.7	AL161936.15	C10orf33	SNORD46	SDCCAG8	UBXD3
RP11-6B6.3	AL162272.10	C10orf38	SNORD47	SDF4	UBXD5
RP11-710N8.2	AL162502.17	C10orf4	SNORD55	SDHB	UCHL5
RP11-763B22.3	AL354951.7	C10orf46	SNORD74	SDHC	UCK2
RP11-763B22.7	AL355355.25	C10orf47	SNORD75	SEC22B	UFC1
RP11-763B22.8	AL355490.24	C10orf54	SNORD76	SELL	UHMK1
RP11-8J9.1	AL355493.14	C10orf56	SNORD77	SEMA4A	UQCRH
RP11-94I2.1	AL355861.19	C10orf6	SNORD78	SEMA6C	UROD
RP11-94I2.2	AL358790.22	C10orf63	SNORD79	SEPN1	USF1
RP11-97C18.1	AL359385.28	C10orf76	SNORD80	SERBP1	USP1
RP11-98D18.7	AL359832.33	C10orf78	SNORD81	SERINC2	USP21
RP3-423B22.5	AL359844.15	C10orf79	SNORD99	SERTAD4	USP24
RP4-597N16.1	AL359878.13	C10orf84	SNRPE	SESN2	USP33
RP4-604K5.1	AL365356.13	C10orf88	SNX27	SETDB1	USP48
RP4-609E1.3	AL365434.13	C10orf95	SNX7	SF3A3	UTP11L
RP4-621B10.3	AL391099.12	C10orf97	SOAT1	SF3B4	VAMP3
RP4-631H13.4	AL391421.27	CACNB2	SORT1	SFN	VAMP4
RP4-631H13.6	AL391427.9	CASC2	SOX13	SFPQ	VANGL1
RP4-654H19.2	AL450326.30	CASP7	SPAG17	SFRS11	VASH2
RP4-665N4.5	AL512631.11	CBARA1	SPATA1	SFRS4	VAV3
RP4-672J20.2	AL512662.8	CCAR1	SPATA17	SFT2D2	VHLL
RP4-680D5.3	AL583860.7	CCDC109A	SPATA21	SGIP1	VPS13D
RP4-680D5.4	AL591408.19	CCDC147	SPATA6	SH2D2A	VPS45
RP4-683M8.1	AL607035.12	CCDC3	SPEN	SH2D5	VPS72
RP4-700A9.1	AL691429.17	CCDC6	SPOCD1	SH3BGRL3	WARS2
RP4-706L14.2	AL731563.9	CCDC7	SPSB1	SH3BP5L	WASF2
RP4-733M16.7	ALDH18A1	CCNJ	SRM	SH3GLB1	WDR26
RP4-736I12.3	ANKRD1	CCNY	SRP9	SHC1	WDR3
RP4-788L13.1	ANKRD16	CDC123	SRRM1	SHE	WDR42A
RP4-796F18.2	ANKRD26	CEP55	SSBP3	SKI	WDR47
RP4-800M22.3	ANUBL1	CH25H	SSR2	SLC16A1	WDR57
RP5-1000E10.4	ANXA11	CHCHD1	SSU72	SLC19A2	WDR63
RP5-1033K19.2	ANXA7	CHST3	SSX2IP	SLC22A15	WDR65
RP5-1053E7.2	AP3M1	CHUK	ST3GAL3	SLC25A24	WDR77
RP5-1065J22.4	ARHGAP12	CISD1	ST6GALNAC3	SLC25A33	WDR78
RP5-1065J22.7	ARHGAP19	CNNM2	ST6GALNAC5	SLC25A44	WDR8
RP5-1077B9.4	ARHGAP21	COL13A1	ST7L	SLC27A3	WDTC1
RP5-1155K23.1	ARHGAP22	COMMD3	STIL	SLC2A1	WNT2B
RP5-1155K23.2	ARID5B	COPEB	STK40	SLC30A1	XKR8
RP5-1160K1.1	ARL3	COX15	STMN1	SLC30A10	XPR1
RP5-862P8.1	ARL5B	CPEB3	STX12	SLC30A2	YARS
RP5-866L20.3	ARMC3	CREM	STX6	SLC30A7	YBX1
RP5-875O13.6	ARMC4	CSGALNACT2	STXBP3	SLC35A3	YIPF1
RP5-882O7.1	ARMETL1	CSTF2T	SUSD4	SLC35D1	YOD1
RP5-882O7.4	AS3MT	CTBP2	SV2A	SLC35F3	YRDC
RP5-890O3.3	ASAH2B	CTGLF4	SYDE2	SLC39A1	YTHDF2
RP5-915N17.3	ASB13	CUEDC2	SYF2	SLC41A1	YY1AP1
RP5-924G13.2	ASCC1	CUGBP2	SYPL2	SLC44A3	Z97195.1
RP5-930J4.5	ATE1	CUL2	SYT11	SLC44A5	Z99127.2
RP5-990P15.2	ATOH7	CUTC	SYT14	SLC45A1	Z99297.1
RP6-74O6.1	ATP5C1	CWF19L1	SYT2	SLC45A3	Z99572.1
RPA2	ATRNL1	DCLRE1A	SYTL1	SLC6A17	ZBTB17
RPAP2	AVPI1	DCLRE1C	TADA1L	SLC6A9	ZBTB37
RPL11	BAMBI	DDIT4	TAF12	SLC9A1	ZBTB40
RPL22	BCCIP	DDX21	TAF13	SMAP2	ZBTB41
RPL5	BICC1	DDX50	TAF1A	SMG5	ZBTB48
RPS27	BLOC1S2	DHTKD1	TAF5L	SMG7	ZBTB7B
RPS6KA1	BMI1	DIP2C	TAGLN2	SMPDL3B	ZBTB8
RPS6KC1	BMS1	DKK1	TARBP1	SMYD2	ZBTB8OS
RPS8	BMS1LP4	DLG5	TARDBP	SMYD3	ZC3H11A
RRAGC	BNIP3	DNA2	TARS2	SNAPIN	ZC3H12A
RRP15	BTAF1	DNAJB12	TAS1R1	SNFT	ZCCHC11
RSBN1	BTRC	DNAJC1	TATDN3	SNIP1	ZCCHC17
RSPO1	BUB3	DNAJC9	TBCE	SNORA14B	ZDHHC18
RTCD1	C10orf10	DNMBP	TBX15	SNORA16A	ZFYVE9
RUNX3	C10orf103	DOCK1	TCEB3	SNORA44	ZMPSTE24
RUSC1	C10orf104	DUSP	TCHH	SNORA61	ZMYM1
RWDD3	C10orf111	DUSP13	TCTEX1D4	SNORA73A	ZMYM4
RXRG	C10orf114	EBF3	TDRKH	SNORD103A	ZMYM6
RYR2	C10orf116	ECD	TEDDM1	SNORD21	ZMYND12
S100A1	C10orf118	EGR2	TEKT2	SNORD38A	ZNF124
S100A10	C10orf119	EIF3S10	TESK2	SNORD38B	ZNF238
S100A11	C10orf129	EIF4EBP2	TFAP2E	SNORD44	ZNF281
S100A13	C10orf131	ELOVL3	TFB2M	SNORD45A	ZNF326
S100A2	C10orf137	EMX2	TGFB2	SNORD45B	ZNF364
S100A5	C10orf141	ENTPD7	TGFBR3	SNORD45C	ZNF436
S100A6	C10orf18	EPC1	THAP3	SNORD46	ZNF496
S100PBP	C10orf22	ERCC6	THBS3	SNORD47	ZNF593
SAMD11	C10orf25	ERLIN1	THEM4	SNORD55	ZNF642
SAMD13	C10orf26	EXOC6	THRAP3	SNORD74	ZNF643
SARS	C10orf28	EXOSC1	TIMM17A	SNORD75	ZNF644
SASS6	C10orf32	FAM107B	TINAGL1	SNORD76	ZNF669
SCAMP3	C10orf33	FAM149B1	TIPRL	SNORD77	ZNF670
SCARNA1	C10orf4	FAM21A	TLR5	SNORD78	ZNF672
SCCPDH	C10orf46	FAM24B	TM2D1	SNORD79	ZNF678
SCMH1	C10orf54	FAM26B	TMCC2	SNORD80	ZNF684
SCNM1	C10orf56	FAM35A	TMCO1	SNORD81	ZNF687
SCNN1D	C10orf59	FAM53B	TMCO4	SNORD99	ZNF691
SCP2	C10orf6	FANK1	TMED5	SNRPE	ZNF692
SCYL1BP1	C10orf63	FAS	TMEM183A	SNX27	ZNF695
SCYL3	C10orf72	FBXL15	TMEM200B	SNX7	ZRANB2
SDC3	C10orf76	FBXO18	TMEM201	SOAT1	ZSCAN20
SDCCAG8	C10orf78	FBXW4	TMEM206	SORT1	ZSWIM5
SDF4	C10orf79	FER1L3	TMEM39B	SOX13	ZYG11B
SDHB	C10orf84	FGFBP3	TMEM48	SPAG17	ZZZ3
SDHC	C10orf88	FRAT1	TMEM50A	SPATA1	ABLIM1
SEC22B	C10orf95	FRAT2	TMEM51	SPATA17	AC016542.11
SELENBP1	C10orf97	FRMD4A	TMEM53	SPATA21	AC022400.9
SEMA4A	CACNB2	FUT11	TMEM54	SPATA6	AC022532.13
SEMA6C	CAMK1D	FZD8	TMEM56	SPEN	AC073585.8
SEPN1	CAMK2G	GBF1	TMEM57	SPSB1	ACADSB
SERBP1	CASC2	GDI2	TMEM58	SRM	ACBD5
SERINC2	CASP7	GFRA1	TMEM59	SRP9	ACBD7
SERTAD4	CBARA1	GHITM	TMEM63A	SRRM1	ACSL5
SESN2	CCAR1	GLUD1	TMEM69	SSBP3	ACTR1A
SETDB1	CCDC109A	GLUDP3	TMEM77	SSR2	ADAM8
SF3A3	CCDC3	GOT1	TMEM79	SSU72	ADD3
SF3B4	CCDC6	GPAM	TMEM9	SSX2IP	ADK
SFN	CCDC7	GRK5	TNFRSF14	ST3GAL3	ADRA2A
SFPQ	CCNJ	GSTO1	TNFRSF18	ST6GALNAC3	AFDC1
SFRS11	CCNY	GSTO2	TNFRSF4	ST6GALNAC5	AIFM2
SFRS4	CDC123	GTPBP4	TNFRSF9	ST7L	AKR1C3
SFT2D2	CEP55	HECTD2	TNNI3K	STIL	AKR1CL2
SGIP1	CH25H	HELLS	TNNT2	STK40	AL022344.3
SH2D2A	CHCHD1	HERC4	TNRC4	STMN1	AL031601.4
SH2D5	CHST3	HIF1AN	TOE1	STX12	AL121928.13
SH3BGRL3	CHUK	HK1	TOMM20	STX6	AL133216.10
SH3BP5L	CISD1	HNRPH3	TOMM40L	STXBP3	AL136368.24
SH3GLB1	CNNM2	HPS1	TOR1AIP1	SUSD4	AL138921.14
SHC1	COMMD3	HSPA14	TOR1AIP2	SV2A	AL139123.15
SHE	COPEB	HTR7	TOR3A	SYDE2	AL139406.14
SKI	COX15	HTRA1	TP53BP2	SYF2	AL157395.17
SLC16A1	CPEB3	IDE	TP73	SYPL2	AL157400.8
SLC19A2	CREM	IDI1	TPM3	SYT11	AL157888.16
SLC22A15	CSGALNACT2	IFIT1	TPR	SYT14	AL158163.11
SLC25A24	CSTF2T	IFIT2	TPRG1L	SYT2	AL161932.15
SLC25A33	CTBP2	IFIT5	TRAF3IP3	SYT6	AL162272.10
SLC25A44	CTGLF4	IKZF5	TRAF5	SYTL1	AL162502.17
SLC27A3	CUEDC2	IL15RA	TRAPPC3	TACSTD2	AL354951.7
SLC2A1	CUGBP2	INPP5F	TRIM11	TADA1L	AL355355.25
SLC30A1	CUL2	IPMK	TRIM33	TAF12	AL355490.24
SLC30A10	CUTC	ITGA8	TRIM45	TAF13	AL355861.19
SLC30A2	CWF19L1	ITGB1	TRIM46	TAF1A	AL358790.22
SLC30A7	CXCL12	ITIH5	TRIM58	TAF5L	AL359385.28
SLC35A3	CYP26C1	JMJD1C	TRIM62	TAGLN2	AL359844.15
SLC35D1	DCLRE1A	KAZALD1	TRIT1	TAL1	AL359878.13
SLC35E2	DCLRE1C	KCNMA1	TROVE2	TARBP1	AL391421.27
SLC35F3	DDIT4	KIAA0157	TRSPAP1	TARDBP	AL391427.9
SLC39A1	DDX21	KIAA0913	TSNAX	TARS2	AL450326.30
SLC41A1	DDX50	KIAA1217	TSPAN1	TAS1R1	AL512598.11
SLC44A3	DHTKD1	KIAA1279	TTC13	TAS1R3	AL512631.11
SLC44A5	DIP2C	KIAA1462	TTC4	TATDN3	AL512662.8
SLC45A1	DKK1	KIAA1598	TTF2	TBCE	AL589794.7
SLC45A3	DLG5	KIAA1754	TUFT1	TBX15	AL591408.19
SLC6A17	DNA2	KIF11	TXLNA	TCEA3	AL607035.12
SLC6A9	DNAJB12	KIF5B	TXNDC12	TCEB3	AL731557.7
SLC9A1	DNAJC1	KIN	TXNIP	TCHH	AL731563.9
SMAP2	DNAJC9	LARP5	TYW3	TCTEX1D1	AL731567.6
SMG5	DNMBP	LCOR	UAP1	TDRD10	ALDH18A1
SMG7	DOCK1	LDB1	UBAP2L	TDRD5	ALOX5
SMPDL3B	DUSP	LHPP	UBE2J2	TDRKH	ANKRD16
SMYD2	DUSP13	LIPA	UBE2Q1	TEKT2	ANKRD26
SMYD3	EBF3	LRRC27	UBE2T	TESK2	ANTXRL
SNAPIN	ECD	LZTS2	UBE4B	TFAP2E	ANUBL1
SNFT	EGR2	MAP3K8	UBIAD1	TFB2M	ANXA11
SNIP1	EIF3S10	MAPK8	UBQLN4	TGFB2	ANXA7
SNORA14B	EIF4EBP2	2011-03-05	UBR4	TGFBR3	AP3M1
SNORA16A	EMX2	2011-03-08	UBXD5	THAP3	APBB1IP
SNORA44	ENTPD7	MARVELD1	UCHL5	THBS3	ARHGAP12
SNORA61	EPC1	MASTL	UCK2	THEM4	ARHGAP19
SNORA73A	ERCC6	MCM10	UFC1	THRAP3	ARHGAP21
SNORD21	ERLIN1	METTL10	UHMK1	TIE1	ARHGAP22
SNORD38A	EXOC6	MGEA5	UQCRH	TIMM17A	ARID5B
SNORD38B	EXOSC1	MINPP1	UROD	TIPRL	ARL3
SNORD44	FAM107B	MKI67	USF1	TLR5	ARL5B
SNORD45A	FAM13C1	MKX	USP1	TM2D1	ARMC3
SNORD45B	FAM149B1	MLLT10	USP21	TMCC2	ARMC4
SNORD45C	FAM160B1	MMS19	USP24	TMCO1	ARMETL1
SNORD46	FAM24B	MORN4	USP33	TMCO4	AS3MT
SNORD47	FAM26B	MPHOSPH1	USP48	TMED5	ASAH2B
SNORD55	FAM35A	MRPL43	UTP11L	TMEM125	ASB13
SNORD74	FAM45B	MRPS16	VAMP3	TMEM183A	ASCC1
SNORD75	FAM53B	MSRB2	VAMP4	TMEM200B	ATE1
SNORD76	FANK1	MTG1	VANGL1	TMEM201	ATOH7
SNORD77	FAS	MXI1	VANGL2	TMEM206	ATP5C1
SNORD78	FBXL15	MYST4	VASH2	TMEM39B	ATRNL1
SNORD79	FBXO18	NCOA4	VHLL	TMEM48	AVPI1
SNORD80	FBXW4	NDUFB8	VPS13D	TMEM50A	BAG3
SNORD81	FER1L3	NET1	VPS45	TMEM51	BAMBI
SNORD99	FGFBP3	NFKB2	VPS72	TMEM52	BCCIP
SNRPE	FGFR2	NHLRC2	WARS2	TMEM53	BLOC1S2
SNX27	FRAT1	NMT2	WASF2	TMEM54	BMI1
SNX7	FRAT2	NOC3L	WDR26	TMEM56	BMPR1A
SOAT1	FRMD4A	NOLC1	WDR3	TMEM57	BMS1
SORT1	FUT11	NPM3	WDR42A	TMEM58	BMS1LP4
SOX13	FZD8	NRBF2	WDR47	TMEM59	BNIP3
SPAG17	GBF1	NRG3	WDR57	TMEM61	BTAF1
SPATA1	GDI2	NRP1	WDR63	TMEM63A	BTRC
SPATA17	GFRA1	NSMCE4A	WDR65	TMEM69	BUB3
SPATA21	GHITM	NSUN6	WDR77	TMEM77	C10orf103
SPATA6	GLUD1	NT5C2	WDR78	TMEM79	C10orf104
SPEN	GLUDP3	NUDT13	WDR8	TMEM9	C10orf11
SPOCD1	GOT1	NUDT5	WDTC1	TNFAIP8L2	C10orf111
SPSB1	GPAM	OAT	WNT4	TNFRSF14	C10orf114
SRM	GRK5	OBFC1	WNT9A	TNFRSF18	C10orf118
SRP9	GSTO1	OPTN	XPR1	TNFRSF1B	C10orf119
SRRM1	GSTO2	OTUD1	YARS	TNFRSF25	C10orf125
SSBP3	GTPBP4	P4HA1	YBX1	TNFRSF4	C10orf131
SSR2	H2AFY2	PANK1	YIPF1	TNFRSF8	C10orf137
SSU72	HECTD2	PAPD1	YOD1	TNFSF4	C10orf140
SSX2IP	HELLS	PAPSS2	YRDC	TNNI3K	C10orf18
ST3GAL3	HERC4	PARD3	YTHDF2	TNRC4	C10orf22
ST6GALNAC3	HIF1AN	PBLD	YY1AP1	TOE1	C10orf25
ST6GALNAC5	HK1	PCBD1	Z97195.1	TOMM20	C10orf26
ST7L	HNRPF	PCGF5	Z99127.2	TOMM40L	C10orf28
STIL	HNRPH3	PDCD11	Z99297.1	TOR1AIP1	C10orf32
STK40	HPS1	PDCD4	Z99572.1	TOR1AIP2	C10orf33
STMN1	HPS6	PDLIM1	ZBTB17	TOR3A	C10orf38
STX12	HPSE2	PDSS1	ZBTB37	TP53BP2	C10orf4
STX6	HSPA14	PDZD7	ZBTB40	TP73	C10orf46
STXBP3	HTR7	PDZD8	ZBTB41	TPM3	C10orf47
SUSD4	HTRA1	PEO1	ZBTB48	TPR	C10orf54
SV2A	IDE	PFKFB3	ZBTB7B	TPRG1L	C10orf56
SYDE2	IDI1	PGAM1	ZBTB8	TRAF3IP3	C10orf57
SYF2	IFIT1	PHYH	ZBTB8OS	TRAF5	C10orf59
SYPL2	IFIT1L	PI4K2A	ZC3H11A	TRAPPC3	C10orf6
SYT11	IFIT3	PIP5K2A	ZC3H12A	TRIM11	C10orf63
SYT14	IFIT5	PITX3	ZCCHC11	TRIM33	C10orf76
SYT2	IKZF5	PLAC9	ZCCHC17	TRIM45	C10orf78
SYT6	IL15RA	PLAU	ZDHHC18	TRIM46	C10orf79
SYTL1	INPP5A	PLCE1	ZFYVE9	TRIM58	C10orf84
TACSTD2	INPP5F	PLEKHA1	ZMPSTE24	TRIM62	C10orf88
TADA1L	IPMK	PLEKHK1	ZMYM1	TRIM67	C10orf95
TAF12	ITGA8	PLXDC2	ZMYM4	TRIT1	C10orf97
TAF13	ITGB1	POLL	ZMYM6	TROVE2	C1QL3
TAF1A	ITIH5	POLR3A	ZMYND12	TRSPAP1	CAMK1D
TAF5L	JMJD1C	PPA1	ZNF238	TSNAX	CAMK2G
TAGLN2	KAZALD1	PPIF	ZNF281	TSPAN2	CASC2
TAL1	KCNMA1	PPP1R3C	ZNF326	TSSK3	CASP7
TARBP1	KIAA0157	PPP3CB	ZNF364	TTC13	CBARA1
TARDBP	KIAA0913	PPRC1	ZNF436	TTC22	CCAR1
TARS2	KIAA1128	PRDX3	ZNF496	TTC24	CCDC109A
TAS1R1	KIAA1217	PRKG1	ZNF593	TTC34	CCDC147
TATDN3	KIAA1279	PRPF18	ZNF642	TTC4	CCDC3
TBCE	KIAA1462	PSAP	ZNF643	TTF2	CCDC6
TBX15	KIAA1598	PSD	ZNF644	TTLL7	CCDC7
TCEA3	KIAA1754	PSTK	ZNF669	TUFT1	CCNJ
TCEB3	KIF11	PTEN	ZNF670	TXLNA	CCNY
TCHH	KIF5B	PTPLA	ZNF672	TXNDC12	CDC123
TCTEX1D1	KIN	RAB11FIP2	ZNF678	TXNIP	CDC2
TDRD10	LARP5	RAB18	ZNF684	TYW3	CEP55
TDRD5	LCOR	RASSF4	ZNF687	UAP1	CHCHD1
TDRKH	LDB1	RBM17	ZNF691	UBAP2L	CHUK
TEKT2	LHPP	REEP3	ZNF692	UBE2J2	CISD1
TESK2	LIPA	RHOBTB1	ZNF695	UBE2Q1	CNNM1
TFAP2E	LIPJ	RP11-108B14.4	ZRANB2	UBE2T	CNNM2
TFB2M	LRRC20	RP11-111N20.3	ZSCAN20	UBE4B	COMMD3
TGFB2	LRRC27	RP11-162G10.4	ZSWIM5	UBIAD1	COMTD1
TGFBR3	LZTS2	RP11-295P9.2	ZYG11B	UBQLN4	COPEB
THAP3	MAP3K8	RP11-336A10.7	ZZZ3	UBR4	COX15
THBS3	MAPK8	RP11-366I13.3	ABCC2	UBXD3	CPEB3
THEM4	2011-03-05	RP11-367H5.5	ABLIM1	UBXD5	CREM
THRAP3	2011-03-08	RP11-369J21.6	AC016396.6	UCHL5	CSGALNACT2
TIMM17A	MARVELD1	RP11-399O19.6	AC016542.11	UCK2	CSTF2T
TIPRL	MASTL	RP11-402L1.1	AC022024.7	UFC1	CTBP2
TLR5	MCM10	RP11-449I17.2	AC022028.7	UHMK1	CTGLF4
TM2D1	MEIG1	RP11-455B2.3	AC022387.8	UQCRH	CUEDC2
TMCC2	METTL10	RP11-455B2.9	AC022400.9	UROD	CUGBP2
TMCO1	MGEA5	RP11-47G11.3	AC022532.13	USF1	CUL2
TMCO4	MGMT	RP11-500G10.4	AC023283.10	USP1	CUTC
TMED5	MINPP1	RP11-50E11.2	AC073370.7	USP21	CWF19L1
TMEM125	MKI67	RP11-517P14.6	AC073585.8	USP24	CYP26C1
TMEM183A	MKX	RP11-529I10.4	ACADSB	USP33	DCLRE1A
TMEM200B	MLLT10	RP11-574K11.20	ACBD5	USP48	DCLRE1C
TMEM201	MMS19	RP11-5G18.2	ACBD7	UTP11L	DDIT4
TMEM206	MORN4	RP11-730A19.6	ACTR1A	VAMP3	DDX21
TMEM39B	MPHOSPH1	RP11-730A19.7	ADAM12	VAMP4	DDX50
TMEM48	MRPL43	RP11-96F8.1	ADD3	VANGL1	DHTKD1
TMEM50A	MRPS16	RPP30	ADK	VANGL2	DHX32
TMEM51	MSRB2	RPP38	ADRA2A	VASH2	DKK1
TMEM52	MTG1	RPS24	AFAP1L2	VAV3	DLG5
TMEM53	MXI1	RRP12	AFDC1	VHLL	DNA2
TMEM54	MYST4	RSU1	AIFM2	VPS13D	DNAJB12
TMEM56	NCOA4	RUFY2	AKR1C3	VPS45	DNAJC1
TMEM57	NDUFB8	SAMD8	AKR1CL2	VPS72	DNAJC12
TMEM58	NET1	SAR1A	AL031601.3	VWA1	DNAJC9
TMEM59	NFKB2	SCD	AL031601.4	WARS2	DNMBP
TMEM61	NHLRC2	SEC23IP	AL121928.13	WASF2	DOCK1
TMEM63A	NMT2	SEC24C	AL133215.17	WDR26	DUSP
TMEM69	NOC3L	SEC31B	AL133216.10	WDR3	DUSP13
TMEM77	NOLC1	SEC61A2	AL135794.19	WDR42A	ECD
TMEM79	NPM3	SEPHS1	AL136368.24	WDR47	ECHDC3
TMEM9	NRBF2	SFXN2	AL137145.13	WDR57	ECHS1
TNFRSF18	NRG3	SFXN3	AL138921.14	WDR63	EGR2
TNFRSF25	NRP1	SFXN4	AL139123.15	WDR65	EIF3S10
TNFRSF8	NSMCE4A	SGMS1	AL139406.14	WDR77	EIF4EBP2
TNNI3K	NSUN6	SHOC2	AL157395.17	WDR78	ELOVL3
TNNT2	NT5C2	SIRT1	AL157400.8	WDR8	ENTPD7
TNR	NUDT5	SLC25A16	AL157788.16	WDTC1	EPC1
TNRC4	OAT	SLC25A28	AL157888.16	WNT2B	ERCC6
TOE1	OBFC1	SLK	AL157895.8	WNT3A	ERLIN1
TOMM20	OPTN	SMC3	AL158163.11	WNT4	EXOC6
TOMM40L	OTUD1	SMNDC1	AL158165.15	WNT9A	EXOSC1
TOR1AIP1	P4HA1	SORBS1	AL161932.15	XKR8	FAM107B
TOR1AIP2	PANK1	SORCS3	AL161936.15	XPR1	FAM149B1
TOR3A	PAPD1	SPAG6	AL162272.10	YARS	FAM160B1
TP53BP2	PAPSS2	SRGN	AL162502.17	YBX1	FAM21A
TP73	PARD3	SSH3BP	AL354951.7	YIPF1	FAM21C
TPM3	PBLD	STAM	AL355355.25	YOD1	FAM24B
TPR	PCGF5	STAMBPL1	AL355490.24	YRDC	FAM35A
TPRG1L	PDCD11	STK32C	AL355493.14	YTHDF2	FAM45B
TRAF5	PDCD4	SUFU	AL355861.19	YY1AP1	FAM53B
TRAPPC3	PDLIM1	SUPV3L1	AL359385.28	Z97195.1	FANK1
TRIM11	PDSS1	SUV39H2	AL359832.33	Z99127.2	FAS
TRIM17	PDZD7	TACC2	AL359844.15	Z99297.1	FBXL15
TRIM33	PDZD8	TAF3	AL359878.13	Z99572.1	FBXO18
TRIM45	PEO1	TBC1D12	AL365434.13	ZBTB17	FBXW4
TRIM46	PFKFB3	TCF7L2	AL365495.14	ZBTB37	FER1L3
TRIM62	PGAM1	TCTN3	AL391099.12	ZBTB40	FGFBP3
TRIM67	PHYH	TDRD1	AL391137.11	ZBTB41	FRAT1
TRIT1	PI4K2A	TET1	AL391421.27	ZBTB48	FRAT2
TROVE2	PIP5K2A	TFAM	AL391427.9	ZBTB7B	FUT11
TRSPAP1	PITX3	THNSL1	AL445431.16	ZBTB8	FZD8
TSNAX	PLAC9	TIAL1	AL445486.10	ZBTB8OS	GBF1
TSPAN2	PLAU	TM9SF3	AL450326.30	ZC3H11A	GDI2
TSSK3	PLCE1	TMEM180	AL512598.11	ZC3H12A	GHITM
TTC13	PLEKHA1	TMEM20	AL512631.11	ZCCHC11	GLUD1
TTC4	PLEKHK1	TMEM26	AL512662.8	ZCCHC17	GLUDP3
TTF2	PLXDC2	TNKS2	AL589787.16	ZDHHC18	GOT1
TTLL7	POLL	TRDMT1	AL589794.7	ZFYVE9	GPAM
TUFT1	POLR3A	TRIM8	AL590502.12	ZMPSTE24	GRK5
TXLNA	PPA1	TRUB1	AL591408.19	ZMYM1	GSTO1
TXNDC12	PPIF	TSPAN14	AL607035.12	ZMYM4	GSTO2
TXNIP	PPP1R3C	TTC18	AL691429.17	ZMYM6	GTPBP4
TYW3	PPP3CB	TUBGCP2	AL731557.7	ZMYND12	H2AFY2
UAP1	PPRC1	TXNL3	AL731559.8	ZNF124	HECTD2
UBAP2L	PRDX3	UBE2D1	AL731563.9	ZNF238	HELLS
UBE2J2	PRKG1	UBTD1	AL731567.6	ZNF281	HERC4
UBE2Q1	PRPF18	UPF2	ALDH18A1	ZNF326	HHEX
UBE2T	PSAP	UROS	ALOX5	ZNF364	HIF1AN
UBE4B	PSD	USMG5	ANK3	ZNF436	HK1
UBIAD1	PSTK	USP54	ANKRD1	ZNF496	HMX2
UBQLN4	PTEN	USP6NL	ANKRD16	ZNF593	HNRPF
UBR4	PTPLA	VCL	ANKRD26	ZNF642	HNRPH3
UBXD3	PWWP2B	VDAC2	ANTXRL	ZNF643	HPS1
UBXD5	RAB11FIP2	VIM	ANUBL1	ZNF644	HPS6
UCHL5	RAB18	VPS26A	ANXA11	ZNF669	HPSE2
UCK2	RASSF4	VTI1A	ANXA7	ZNF670	HSPA14
UFC1	RBM17	WAC	AP3M1	ZNF672	HTR7
UHMK1	REEP3	WAPAL	ARHGAP12	ZNF678	IDE
UQCRH	RGS10	WDR11	ARHGAP19	ZNF684	IDI1
UROD	RHOBTB1	WDR37	ARHGAP21	ZNF687	IFIT1
USF1	RP11-108B14.4	XPNPEP1	ARHGAP22	ZNF691	IFIT2
USP1	RP11-111N20.3	YME1L1	ARID5B	ZNF692	IFIT3
USP21	RP11-126H7.2	ZDHHC16	ARL3	ZNF695	IFIT5
USP24	RP11-295P9.2	ZDHHC6	ARL5B	ZNF697	IKZF5
USP33	RP11-336A10.7	ZEB1	ARMC3	ZRANB2	IL15RA
USP48	RP11-366I13.3	ZFYVE27	ARMC4	ZSCAN20	INPP5A
UTP11L	RP11-369J21.6	ZMIZ1	ARMETL1	ZSWIM5	INPP5F
VAMP3	RP11-399O19.6	ZMYND11	ASAH2B	ZYG11A	IPMK
VAMP4	RP11-402L1.1	ZNF22	ASB13	ZYG11B	ITGA8
VANGL1	RP11-449I17.2	ZNF239	ASCC1	ZZZ3	ITGB1
VANGL2	RP11-455B2.3	ZNF248	ATE1	ABLIM1	JMJD1C
VASH2	RP11-455B2.9	ZNF25	ATOH7	AC016542.11	KAZALD1
VAV3	RP11-479G22.5	ZNF32	ATP5C1	AC022400.9	KCNIP2
VHLL	RP11-500G10.4	ZNF33A	ATQL4	AC022532.13	KIAA0157
VPS13D	RP11-507K13.4	ZNF33B	ATRNL1	AC023283.10	KIAA0913
VPS45	RP11-508N22.5	ZNF365	AVPI1	AC073585.8	KIAA1128
VPS72	RP11-50E11.2	ZNF37B	BAG3	ACADSB	KIAA1279
VWA1	RP11-529I10.4	ZNF438	BAMBI	ACBD5	KIAA1598
VWA5B1	RP11-574K11.20	ZNF485	BCCIP	ACBD7	KIAA1754
WARS2	RP11-730A19.6	ZNF487	BICC1	ACSL5	KIF11
WASF2	RP11-730A19.7	ZNF503	BLOC1S2	ACTR1A	KIF5B
WDR26	RP11-96F8.1	ZNF511	BMI1	ADAM12	KIN
WDR3	RPP30	ZNF518A	BMPR1A	ADAM8	LARP5
WDR42A	RPP38	ZWINT	BMS1	ADAMTS14	LCOR
WDR47	RPS24	AASDHPPT	BMS1LP4	ADARB2	LDB1
WDR57	RRP12	AC006299.1	BNIP3	ADD3	LHPP
WDR63	RSU1	AC009532.9	BTAF1	ADK	LIPA
WDR65	RUFY2	AC009656.11	BTRC	ADRA2A	LIPJ
WDR77	SAMD8	AC016450.10	BUB3	ADRB1	LOXL4
WDR78	SAR1A	AC022878.8	C10orf10	AFAP1L2	LRRC20
WDR8	SCD	AC026250.16	C10orf103	AFDC1	LRRC27
WDTC1	SEC23IP	AC044839.16	C10orf104	AIFM2	LZTS2
WI2-2998D17.2	SEC24C	AC068205.25	C10orf11	AKR1C3	MAP3K8
WNT2B	SEC31B	AC069287.7	C10orf111	AKR1CL2	MAPK8
WNT3A	SEC61A2	AC087521.10	C10orf114	AL022344.3	2011-03-05
WNT4	SEMA4G	AC090587.1	C10orf116	AL031601.4	2011-03-08
WNT9A	SEPHS1	AC104942.5	C10orf118	AL121749.14	MARVELD1
XKR8	SFXN2	AC116533.11	C10orf119	AL121928.13	MASTL
XPR1	SFXN3	AC116535.9	C10orf125	AL133216.10	MCM10
XXyac-YX155B6.2	SFXN4	AC122179.6	C10orf128	AL133387.8	MEIG1
YARS	SGMS1	AC124798.5	C10orf131	AL136368.24	METTL10
YBX1	SHOC2	AC131971.9	C10orf132	AL138921.14	MGEA5
YIPF1	SIRT1	AC136475.7	C10orf136	AL139123.15	MGMT
YOD1	SLC25A16	ACAD8	C10orf137	AL139406.14	MINPP1
YRDC	SLC25A28	ACCS	C10orf140	AL157395.17	MKI67
YTHDF2	SLC29A3	ACP2	C10orf141	AL157400.8	MKX
YY1AP1	SLK	ADM	C10orf18	AL157888.16	MLLT10
Z97195.1	SMC3	AGBL2	C10orf22	AL158163.11	MMS19
Z99127.2	SMNDC1	AHNAK	C10orf25	AL161932.15	MORN4
Z99297.1	SORBS1	AL135932.7	C10orf26	AL161936.15	MPHOSPH1
Z99572.1	SPAG6	ALDH3B1	C10orf28	AL162272.10	MRPL43
ZBTB17	SRGN	ALG8	C10orf30	AL162502.17	MRPS16
ZBTB37	SSH3BP	ALG9	C10orf32	AL354951.7	MSRB2
ZBTB40	ST8SIA6	ALKBH3	C10orf33	AL355355.25	MTG1
ZBTB41	STAM	ALKBH8	C10orf35	AL355490.24	MXI1
ZBTB48	STAMBPL1	AMBRA1	C10orf38	AL355861.19	MYST4
ZBTB7B	STK32C	AMOTL1	C10orf4	AL358790.22	NANOS1
ZBTB8	SUFU	ANGPTL5	C10orf46	AL359385.28	NCOA4
ZBTB8OS	SUPV3L1	ANKRD42	C10orf47	AL359832.33	NDST2
ZC3H11A	SUV39H2	ANKRD49	C10orf53	AL359844.15	NDUFB8
ZC3H12A	SVIL	AP000442.6	C10orf56	AL359878.13	NET1
ZCCHC11	TAF3	AP000479.5	C10orf59	AL360181.37	NFKB2
ZCCHC17	TBC1D12	AP000580.6	C10orf6	AL390294.19	NHLRC2
ZDHHC18	TCF7L2	AP000662.4	C10orf63	AL391005.9	NKX6-2
ZFYVE9	TCTN3	AP000753.4	C10orf64	AL391421.27	NMT2
ZMPSTE24	TDRD1	AP000781.6	C10orf67	AL391427.9	NOC3L
ZMYM1	TET1	AP000807.4	C10orf72	AL445199.37	NOLC1
ZMYM4	TFAM	AP000812.4	C10orf76	AL450326.30	NPM3
ZMYM6	THNSL1	AP000907.6	C10orf78	AL512598.11	NRBF2
ZMYND12	TIAL1	AP000926.6	C10orf79	AL512631.11	NSMCE4A
ZNF124	TM9SF3	AP000942.6	C10orf84	AL512662.8	NSUN6
ZNF238	TMEM20	AP001007.5	C10orf88	AL591408.19	NT5C2
ZNF281	TMEM26	AP001107.5	C10orf95	AL607035.12	NUDT13
ZNF326	TNKS2	AP001157.4	C10orf97	AL691429.17	NUDT5
ZNF364	TRDMT1	AP001160.4	CACNB2	AL731557.7	OAT
ZNF436	TRIM8	AP001187.11	CAMK1D	AL731563.9	OBFC1
ZNF496	TRUB1	AP001267.4	CAMK2G	AL731567.6	OPTN
ZNF593	TSPAN14	AP001318.6	CASC2	AL732375.18	OTUD1
ZNF642	TSPAN15	AP001324.4	CASP7	ALDH18A1	P4HA1
ZNF643	TTC18	AP001359.4	CBARA1	ALOX5	PANK1
ZNF644	TUBGCP2	AP001372.4	CCAR1	ANKRD16	PAOX
ZNF669	TXNL3	AP001453.6	CCDC109A	ANKRD26	PAPD1
ZNF670	UBE2D1	AP001458.6	CCDC147	ANTXRL	PAPSS2
ZNF672	UBTD1	AP001494.4	CCDC3	ANUBL1	PARD3
ZNF678	UNC5B	AP001781.5	CCDC6	ANXA11	PARG
ZNF684	UPF2	AP001924.5	CCDC7	ANXA7	PBLD
ZNF687	UROS	AP002360.4	CCNJ	AP3M1	PCBD1
ZNF691	USMG5	AP002380.3	CCNY	APBB1IP	PCDH21
ZNF692	USP54	AP002490.4	CDC123	ARHGAP12	PCGF5
ZNF695	USP6NL	AP002748.4	CDC2	ARHGAP19	PCGF6
ZRANB2	VCL	AP002893.3	CDH23	ARHGAP21	PDCD11
ZSCAN20	VDAC2	AP002956.1	CEP55	ARHGAP22	PDCD4
ZSWIM5	VIM	AP003068.3	CHAT	ARID5B	PDLIM1
ZYG11A	VPS26A	AP003108.3	CHCHD1	ARL3	PDSS1
ZYG11B	VTI1A	AP003110.2	CHST3	ARL5B	PDZD7
ZZZ3	WAC	AP003392.2	CHUK	ARMC3	PDZD8
ABLIM1	WAPAL	AP003419.3	CISD1	ARMC4	PEO1
AC016542.11	WDR11	AP003774.4	CNNM2	ARMETL1	PFKFB3
AC022400.9	WDR37	AP003778.3	COL13A1	AS3MT	PFKP
AC022532.13	XPNPEP1	AP003781.3	COMMD3	ASAH2B	PGAM1
AC023283.10	YME1L1	AP004609.1	COMTD1	ASB13	PHYH
AC068707.7	ZDHHC16	AP005434.4	COPEB	ASCC1	PI4K2A
AC073370.7	ZDHHC6	AP005718.3	COX15	ATE1	PIK3AP1
AC074322.4	ZEB1	AP006216.1	CPEB3	ATOH7	PIP5K2A
AC091817.6	ZFYVE27	AP006284.2	CREM	ATP5C1	PITRM1
ACADSB	ZMIZ1	AP006287.2	CSGALNACT2	ATRNL1	PITX3
ACBD5	ZMYND11	AP006289.2	CSTF2T	AVPI1	PLAU
ACBD7	ZNF22	AP006621.1	CTBP2	BAG3	PLCE1
ACTR1A	ZNF239	AP2A2	CTGLF10P	BAMBI	PLEKHA1
ADAM12	ZNF248	APBB1	CTGLF4	BCCIP	PLEKHK1
ADAM8	ZNF25	API5	CUEDC2	BICC1	PLXDC2
ADAMTS14	ZNF32	APIP	CUGBP2	BLOC1S2	POLL
ADARB2	ZNF33A	APLP2	CUL2	BMI1	POLR3A
ADD3	ZNF33B	APOA5	CUTC	BMPR1A	PPA1
ADK	ZNF37A	AQP11	CUZD1	BMS1	PPAPDC1A
ADRA2A	ZNF438	ARCN1	CWF19L1	BMS1LP4	PPIF
ADRB1	ZNF485	ARFGAP2	CYP2E1	BNIP3	PPP3CB
AFAP1L2	ZNF487	ARFIP2	DCLRE1A	BTAF1	PPRC1
AFDC1	ZNF488	ARHGAP1	DCLRE1C	BTRC	PRDX3
AIFM2	ZNF503	ARHGAP20	DDIT4	BUB3	PRKCQ
AKR1C1	ZNF511	ARHGEF12	DDX21	C10orf10	PRKG1
AKR1CL2	ZNF518A	ARHGEF17	DDX50	C10orf103	PRPF18
AL121928.13	ZWINT	ARNTL	DHTKD1	C10orf104	PRTFDC1
AL133215.17	AASDHPPT	ATG16L2	DKK1	C10orf107	PSAP
AL133216.10	AC006299.1	ATG2A	DLG5	C10orf11	PSD
AL133387.8	AC009532.9	ATM	DNA2	C10orf111	PSTK
AL136368.24	AC009656.11	ATP5L	DNAJB12	C10orf112	PTEN
AL138921.14	AC016450.10	B3GAT3	DNAJC1	C10orf114	PTER
AL139123.15	AC019227.4	BACE1	DNAJC9	C10orf116	PTPLA
AL139340.12	AC022878.8	BAD	DNMBP	C10orf118	PTPRE
AL139406.14	AC026250.16	BANF1	DOCK1	C10orf119	PWWP2B
AL157395.17	AC026639.6	BBS1	DPYSL4	C10orf125	RAB11FIP2
AL157400.8	AC044839.16	BCDO2	DUSP	C10orf131	RAB18
AL157888.16	AC068580.3	BDNF	DUSP13	C10orf132	RASSF4
AL158163.11	AC069287.7	BET1L	EBF3	C10orf137	RBM17
AL161932.15	AC079296.5	BIRC2	ECD	C10orf140	REEP3
AL161936.15	AC087521.10	BIRC3	ECHDC3	C10orf141	RGS10
AL162272.10	AC090587.1	BLID	EGR2	C10orf18	RHOBTB1
AL162502.17	AC090625.5	BRMS1	EIF3S10	C10orf22	RP11-108B14.4
AL353664.14	AC104942.5	BSCL2	EIF4EBP2	C10orf25	RP11-111N20.3
AL354951.7	AC107956.8	BTBD10	ELOVL3	C10orf28	RP11-295P9.2
AL355355.25	AC108448.12	BUD13	EMX2	C10orf30	RP11-310E22.2
AL355490.24	AC116533.11	C11orf1	ENTPD1	C10orf32	RP11-324H6.7
AL355861.19	AC122179.6	C11orf10	ENTPD7	C10orf33	RP11-358L16.4
AL356056.22	AC124798.5	C11orf17	EPC1	C10orf35	RP11-366I13.3
AL358790.22	AC131971.9	C11orf2	ERCC6	C10orf38	RP11-369J21.6
AL359385.28	AC136475.7	C11orf24	ERLIN1	C10orf4	RP11-399O19.6
AL359707.18	ACAD8	C11orf30	EXOC6	C10orf46	RP11-402L1.1
AL359832.33	ACAT1	C11orf31	EXOSC1	C10orf47	RP11-449I17.2
AL359844.15	ACCS	C11orf46	FAM107B	C10orf53	RP11-455B2.3
AL359878.13	ACP2	C11orf48	FAM13C1	C10orf54	RP11-455B2.9
AL360181.37	ACTN3	C11orf49	FAM149B1	C10orf56	RP11-479O17.7
AL390294.19	ADAMTS15	C11orf51	FAM160B1	C10orf57	RP11-479O17.8
AL391005.9	ADM	C11orf52	FAM21A	C10orf59	RP11-481A12.5
AL391137.11	ADRBK1	C11orf54	FAM21C	C10orf6	RP11-500G10.4
AL391421.27	AHNAK	C11orf57	FAM24B	C10orf63	RP11-508N22.5
AL445199.37	AIP	C11orf58	FAM26B	C10orf64	RP11-529I10.4
AL450326.30	AL135932.7	C11orf59	FAM35A	C10orf67	RP11-543N17.2
AL450334.15	ALDH3B1	C11orf60	FAM45B	C10orf72	RP11-549L6.2
AL512598.11	ALG8	C11orf61	FAM53B	C10orf76	RP11-564C4.7
AL512631.11	ALG9	C11orf63	FANK1	C10orf78	RP11-574K11.20
AL512662.8	ALKBH3	C11orf65	FAS	C10orf79	RP11-57G10.6
AL590068.7	ALKBH8	C11orf67	FBXL15	C10orf84	RP11-671E7.1
AL591408.19	AMBRA1	C11orf68	FBXO18	C10orf88	RP11-730A19.6
AL591684.7	AMOTL1	C11orf70	FBXW4	C10orf92	RP11-730A19.7
AL592546.7	ANGPTL5	C11orf71	FER1L3	C10orf93	RP11-85G18.4
AL607035.12	ANKRD13D	C11orf72	FGFBP3	C10orf95	RPP30
AL691429.17	ANKRD42	C11orf73	FGFR2	C10orf97	RPP38
AL731557.7	ANKRD49	C11orf74	FRAT1	C1QL3	RPS24
AL731563.9	AP000442.6	C11orf75	FRAT2	CACNB2	RRP12
AL731567.6	AP000580.6	C11orf79	FRMD4A	CAMK1D	RSU1
AL731696.4	AP000662.4	C11orf83	FUT11	CAMK2G	RUFY2
AL731733.9	AP000708.1	C11orf84	FZD8	CASC2	SAMD8
ALDH18A1	AP000753.4	C11orf87	GBF1	CASP7	SAR1A
ALOX5	AP000769.5	C11orf9	GDI2	CBARA1	SCD
ANK3	AP000807.4	C2CD2L	GHITM	CCAR1	SEC23IP
ANKRD16	AP000812.4	C2CD3	GLUD1	CCDC109A	SEC24C
ANKRD26	AP000889.6	CADM1	GLUDP3	CCDC147	SEC31B
ANTXRL	AP000907.6	CAPRIN1	GOT1	CCDC3	SEC61A2
ANUBL1	AP000926.6	CARS	GPAM	CCDC6	SEPHS1
ANXA11	AP000942.6	CASP4	GRID1	CCDC7	SFMBT2
ANXA7	AP001007.5	CAT	GRK5	CCNJ	SFRP5
AP3M1	AP001107.5	CBL	GSTO1	CCNY	SFXN2
APBB1IP	AP001153.5	CCDC34	GSTO2	CDC123	SFXN3
ARHGAP12	AP001157.4	CCDC67	GTPBP4	CDC2	SFXN4
ARHGAP19	AP001160.4	CCDC82	H2AFY2	CDH23	SGMS1
ARHGAP21	AP001187.11	CCDC83	HECTD2	CEP55	SGPL1
ARHGAP22	AP001187.5	CCDC84	HELLS	CH25H	SH2D4B
ARID5B	AP001266.4	CCDC85B	HERC4	CHAT	SHOC2
ARL3	AP001267.4	CCDC86	HIF1AN	CHCHD1	SIRT1
ARL5B	AP001318.6	CCDC87	HK1	CHST3	SLC16A9
ARMC3	AP001324.4	CCDC89	HMX2	CHUK	SLC25A16
ARMC4	AP001372.4	CCDC90B	HMX3	CISD1	SLC25A28
ARMETL1	AP001453.6	CCND1	HNRPF	CNNM1	SLC29A3
AS3MT	AP001458.6	CCS	HNRPH3	CNNM2	SLK
ASAH2B	AP001462.3	CD15	HPS1	COL13A1	SMC3
ASB13	AP001494.4	CD151	HPS6	COMMD3	SMNDC1
ASCC1	AP001781.5	CD248	HPSE2	COMTD1	SORBS1
ATE1	AP001830.5	CD44	HSPA12A	COPEB	SPAG6
ATOH7	AP001924.5	CD59	HSPA14	COX15	SRGN
ATP5C1	AP001925.5	CDC42EP2	HTRA1	CPEB3	SSH3BP
ATRNL1	AP002360.4	CDCA5	IDE	CPXM2	ST8SIA6
AVPI1	AP002380.3	CDK2AP2	IDI1	CREM	STAM
BAG3	AP002490.4	CDON	IFIT1	CRTAC1	STAMBPL1
BAMBI	AP002748.4	CENTD2	IFIT2	CSGALNACT2	STK32C
BCCIP	AP002893.3	CEP164	IFIT3	CSTF2T	STOX1
BICC1	AP002956.1	CEP57	IFIT5	CTBP2	SUFU
BLOC1S2	AP002986.2	CFL1	IKZF5	CTGLF4	SUPV3L1
BMI1	AP003068.3	CHCHD8	IL15RA	CUEDC2	SUV39H2
BMPR1A	AP003108.3	CHEK1	INPP5A	CUGBP2	SYNPO2L
BMS1	AP003110.2	CHKA	INPP5F	CUL2	TACC2
BMS1LP4	AP003392.2	CHORDC1	IPMK	CUTC	TAF3
BNIP3	AP003419.3	CKAP5	ITGA8	CWF19L1	TAF5
BTAF1	AP003774.4	CLP1	ITGB1	CXCL12	TBC1D12
BTRC	AP003781.3	CLPB	ITIH5	CYP26A1	TCERG1L
BUB3	AP004609.1	CNGA4	JMJD1C	CYP26C1	TCF7L2
C10orf10	AP005718.3	CNTF	KAZALD1	CYP2E1	TCTN3
C10orf103	AP006216.1	COMMD9	KCNIP2	DCLRE1A	TDRD1
C10orf104	AP006260.2	COPB1	KIAA0157	DCLRE1C	TET1
C10orf107	AP006284.2	CORO1B	KIAA0913	DDIT4	TFAM
C10orf11	AP006287.2	CPT1A	KIAA1128	DDX21	THNSL1
C10orf111	AP006289.2	CREB3L1	KIAA1217	DDX50	TIAL1
C10orf114	AP006621.1	CREBZF	KIAA1274	DHTKD1	TIMM23
C10orf116	AP2A2	CRY2	KIAA1279	DIP2C	TIMM23B
C10orf118	APBB1	CRYAB	KIAA1462	DKK1	TM9SF3
C10orf119	API5	CSTF3	KIAA1598	DLG5	TMEM180
C10orf125	APIP	CTNND1	KIAA1754	DNA2	TMEM20
C10orf131	APOA5	CTR9	KIF11	DNAJB12	TNKS2
C10orf132	AQP11	CTSC	KIF5B	DNAJC1	TRDMT1
C10orf137	ARCN1	CTSD	KIN	DNAJC12	TRIM8
C10orf140	ARFGAP2	CTTN	LARP5	DNAJC9	TRUB1
C10orf141	ARFIP2	CUGBP1	LBX1	DNMBP	TSPAN14
C10orf18	ARHGAP1	CUL5	LCOR	DOCK1	TTC18
C10orf22	ARHGAP20	CWC15	LDB1	DPYSL4	TUBGCP2
C10orf25	ARHGEF12	CWF19L2	LHPP	DRD1IP	TXNL3
C10orf26	ARHGEF17	CYBASC3	LIPA	DUSP	TYSND1
C10orf28	ARL2	CYP2R1	LIPJ	DUSP13	UBE2D1
C10orf30	ARNTL	DAK	LOXL4	DYDC1	UBTD1
C10orf32	ATG16L2	DCDC1	LRRC20	DYDC2	UPF2
C10orf33	ATG2A	DCPS	LRRC27	EBF3	UROS
C10orf35	ATHL1	DCUN1D5	LZTS2	ECD	USMG5
C10orf38	ATM	DDB1	MAP3K8	ECHDC3	USP54
C10orf4	ATP5L	DDB2	MAPK8	ECHS1	USP6NL
C10orf46	B3GAT3	DDX25	2011-03-05	EGR2	VCL
C10orf47	BACE1	DDX6	2011-03-08	EIF3S10	VDAC2
C10orf53	BAD	DEAF1	MARVELD1	EIF4EBP2	VIM
C10orf54	BANF1	DEPDC7	MASTL	ELOVL3	VPS26A
C10orf56	BARX2	DGKZ	MCM10	ENTPD7	VTI1A
C10orf57	BBS1	DHCR7	MEIG1	EPC1	WAC
C10orf59	BCL9L	DIXDC1	METTL10	ERCC6	WAPAL
C10orf6	BDNF	DLAT	MGEA5	ERLIN1	WDR11
C10orf63	BET1L	DLG2	MINPP1	EXOC6	WDR37
C10orf67	BIRC2	DNAJC4	MKI67	EXOSC1	XPNPEP1
C10orf72	BIRC3	DPAGT1	MKX	FAM107B	YME1L1
C10orf76	BRMS1	DPF2	MLLT10	FAM13C1	ZDHHC16
C10orf78	BSCL2	DRAP1	MMRN2	FAM149B1	ZDHHC6
C10orf79	BSX	DYNC2H1	MMS19	FAM160B1	ZEB1
C10orf82	BTBD10	E2F8	MORN4	FAM21A	ZFYVE27
C10orf84	BUD13	EED	MPHOSPH1	FAM21C	ZMIZ1
C10orf88	C11orf1	EEF1G	MRPL43	FAM24B	ZMYND11
C10orf93	C11orf10	EFEMP2	MRPS16	FAM26B	ZNF22
C10orf95	C11orf17	EHBP1L1	MSRB2	FAM35A	ZNF239
C10orf97	C11orf2	EHD1	MTG1	FAM45B	ZNF248
C1QL3	C11orf24	EI24	MXI1	FAM53B	ZNF25
CACNB2	C11orf30	EIF1AD	MYO3A	FANK1	ZNF32
CAMK1D	C11orf31	EIF3F	MYST4	FAS	ZNF33A
CAMK2G	C11orf44	EIF3M	NANOS1	FBXL15	ZNF33B
CASC2	C11orf46	EIF4G2	NCOA4	FBXO18	ZNF37A
CASP7	C11orf48	ELP4	NDST2	FBXW4	ZNF438
CBARA1	C11orf49	EML3	NDUFB8	FER1L3	ZNF485
CCAR1	C11orf51	ENDOD1	NEBL	FGF8	ZNF487
CCDC109A	C11orf52	ESRRA	NET1	FGFBP3	ZNF488
CCDC147	C11orf54	ETS1	NEUROG3	FGFR2	ZNF503
CCDC3	C11orf57	EXPH5	NFKB2	FOXI2	ZNF511
CCDC6	C11orf58	F2	NHLRC2	FRAT1	ZNF518A
CCDC7	C11orf59	FADD	NMT2	FRAT2	ZWINT
CCNJ	C11orf60	FADS1	NOC3L	FUT11	AASDHPPT
CCNY	C11orf61	FADS2	NOLC1	FZD8	ABCG4
CDC123	C11orf65	FAM111A	NPM3	GAD2	ABTB2
CDC2	C11orf67	FAM111B	NRBF2	GATA3	AC006299.1
CDH23	C11orf68	FAM118B	NRG3	GBF1	AC009532.9
CEP55	C11orf70	FAM160A2	NRP1	GDF10	AC019227.4
CH25H	C11orf71	FAM168A	NSMCE4A	GDI2	AC026250.16
CHAT	C11orf72	FAM181B	NSUN6	GFRA1	AC026639.6
CHCHD1	C11orf73	FAM76B	NT5C2	GHITM	AC044839.16
CHST3	C11orf74	FAM89B	NUDT13	GJD4	AC068205.25
CHUK	C11orf75	FAR1	NUDT5	GLUD1	AC069287.7
CISD1	C11orf79	FAU	OAT	GLUDP3	AC087521.10
CNNM1	C11orf80	FBXL11	OBFC1	GOT1	AC090587.1
CNNM2	C11orf83	FBXO3	OGDHL	GPAM	AC104389.8
COL13A1	C11orf84	FCHSD2	OPTN	GPR120	AC104942.5
COMMD3	C11orf87	FDX1	OTUD1	GPR123	AC107956.8
COMTD1	C2CD2L	FEN1	P4HA1	GPR158	AC116021.5
COPEB	C2CD3	FIBP	PANK1	GPRIN2	AC116533.11
COX15	CADM1	FJX1	PAOX	GRID1	AC122179.6
CPEB3	CALCB	FKBP2	PAPD1	GRK5	AC123788.7
CPXM2	CAPN1	FLI1	PAPSS2	GSTO1	AC124798.5
CREM	CAPN5	FNBP4	PARD3	GSTO2	AC129929.5
CRTAC1	CAPRIN1	FOSL1	PAX2	GTPBP4	AC131971.9
CSGALNACT2	CARS	FOXRED1	PBLD	H2AFY2	AC132216.7
CSTF2T	CASP4	FRMD8	PCBD1	HECTD2	ACAD8
CTBP2	CAT	FTH1	PCDH21	HELLS	ACAT1
CTGLF2	CBL	FXC1	PCGF5	HERC4	ACCS
CTGLF4	CCDC15	FZD4	PCGF6	HHEX	ACP2
CUEDC2	CCDC34	GAB2	PDCD11	HIF1AN	ACTN3
CUGBP2	CCDC82	GAL3ST3	PDCD4	HK1	ADM
CUL2	CCDC83	GALNTL4	PDSS1	HMX2	ADRBK1
CUTC	CCDC84	GANAB	PDZD7	HMX3	AGBL2
CWF19L1	CCDC85B	GNG3	PDZD8	HNRPF	AHNAK
CXCL12	CCDC86	GPR137	PEO1	HNRPH3	AIP
CYP26A1	CCDC87	GPR83	PFKFB3	HPS1	AL049629.28
CYP26C1	CCDC89	GTF2H1	PFKP	HPS6	AL135932.7
DCLRE1A	CCDC90B	GUCY1A2	PGAM1	HPSE2	ALDH3B1
DCLRE1C	CCKBR	GYLTL1B	PHYH	HSPA12A	ALG8
DDIT4	CCND1	H2AFX	PI4K2A	HSPA14	ALG9
DDX21	CCS	HARBI1	PIK3AP1	HTR7	ALKBH3
DDX50	CD15	HIPK3	PIP5K2A	HTRA1	ALKBH8
DHTKD1	CD151	HMBS	PITRM1	IDE	ALX4
DHX32	CD248	HNRNPUL2	PITX3	IDI1	AMBRA1
DIP2C	CD44	HPS5	PLAC9	IFIT1	AMOTL1
DKK1	CD59	HSD17B12	PLAU	IFIT2	AMPD3
DLG5	CD81	HSPA8	PLCE1	IFIT3	ANGPTL5
DNA2	CDC42EP2	HSPB2	PLEKHA1	IFIT5	ANKRD13D
DNAJB12	CDCA5	HTATIP2	PLEKHK1	IKZF5	ANKRD42
DNAJC1	CDK2AP2	HYOU1	PLXDC2	IL15RA	ANKRD49
DNAJC9	CDON	IFITM1	POLL	INA	AP000442.6
DNMBP	CENTD2	IFITM2	POLR3A	INPP5A	AP000580.6
DOCK1	CEP164	IFITM3	PPA1	INPP5F	AP000662.4
DPYSL4	CEP57	IGHMBP2	PPAPDC1A	IPMK	AP000679.7
DRD1IP	CFL1	IL18	PPIF	ITGB1	AP000721.5
DRGX	CHCHD8	ILK	PPP1R3C	ITIH5	AP000753.4
DUSP	CHEK1	IMMP1L	PPP3CB	JMJD1C	AP000769.5
DUSP13	CHORDC1	INCENP	PPRC1	KAZALD1	AP000781.6
DYDC1	CKAP5	INPPL1	PRDX3	KCNIP2	AP000807.4
DYDC2	CLCF1	INSC	PRKCQ	KCNMA1	AP000812.4
EBF3	CLNS1A	INTS4	PRKG1	KIAA0157	AP000907.6
ECD	CLP1	INTS5	PRPF18	KIAA0913	AP000926.6
[truncated: 16,917 more rows]

## Sheet: H3K27Me3 genes
ESC H3K27Me3 genes	MSC H3K27Me3 genes	Osteoblast H3K27Me3 genes	U2OS H3K27Me3 genes	HSC H3K27Me3 genes	CD36 H3K27Me3 genes
ABHD7	ABCD3	AC092803.2	AC092803.2	ABCD3	ABHD7
AC092803.2	AC096542.2	AC092805.2	AC097059.2	ABHD7	AC092803.2
AC098691.2	AC097065.2	AC092811.2	AC138393.2	AC092265.3	AC093420.2
AC099796.2	AC098936.2	AC093423.2	ADAMTSL4	AC092802.2	AC098691.2
AC103591.3	AC099756.2	AC093577.2	AL117351.12	AC092803.2	AC098936.2
AC104336.2	AC104336.2	AC098934.3	AL157904.24	AC092809.2	AC099065.2
AC104453.2	AC113175.2	AC098936.2	AL356693.37	AC096640.2	AC099565.2
AC114494.2	AC115286.3	AC099060.2	AL359504.29	AC096645.2	AC103591.3
ACTA1	ACTA1	AC103590.2	AL359553.14	AC098691.2	AC104336.2
ACTN2	ADAR	AC104335.2	AL512637.18	AC098936.2	AC104453.2
ADAM15	ADORA1	AC104336.2	AL583842.40	AC103591.3	AC114491.1
ADAM30	AL021920.1	AC104453.2	AL645728.31	AC104336.2	AC114498.2
ADAMTSL4	AL022145.1	AC113175.2	AL669831.13	AC104453.2	AC115286.3
ADC	AL033529.25	AC114494.2	AL732363.8	AC105754.3	AC118556.2
ADORA1	AL035403.10	AC115286.3	AURKAIP1	AC114491.1	ACTA1
AJAP1	AL035404.20	AC118550.2	BXDC5	AC115286.3	ACTN2
AK3L1	AL035408.5	ACTA1	CRB1	ACTA1	ADC
AK5	AL035411.28	ACTL8	CYR61	ACTL8	ADORA1
AKR7A3	AL035704.9	ACTN2	DLGAP3	ACTN2	AJAP1
AL008733.10	AL109966.2	ADORA1	GTF2B	ADC	AK3L1
AL021920.1	AL109966.36	ADPRHL2	HSD3B1	ADORA1	AK5
AL031282.1	AL121988.10	AIM1L	LCE3A	AGRN	AKT3
AL031602.14	AL122001.32	AJAP1	NBPF9	AGT	AL008733.10
AL035404.20	AL135842.15	AL008733.10	PLEKHN1	AJAP1	AL021920.1
AL035405.13	AL136373.21	AL009183.10	PTGFRN	AK3L1	AL031602.14
AL080251.23	AL137790.4	AL021920.1	RFX5	AK5	AL033529.25
AL109936.11	AL137798.8	AL022145.1	RP11-120D12.2	AL008733.10	AL035404.20
AL121988.10	AL139130.28	AL033529.25	RP11-211A18.1	AL021920.1	AL035405.13
AL121992.24	AL139138.17	AL035404.20	RP4-651E10.3	AL022145.1	AL035704.9
AL136373.21	AL139288.15	AL035405.13	RP5-837O21.4	AL031282.1	AL049710.18
AL137798.8	AL158837.14	AL035704.9	RP5-837O21.5	AL031602.14	AL080251.23
AL139130.28	AL160059.7	AL049798.7	RP5-837O21.6	AL033529.25	AL109948.9
AL139288.15	AL161793.9	AL121988.10	RP5-837O21.7	AL035403.10	AL118511.25
AL160004.18	AL354713.7	AL122001.32	RP5-837O21.8	AL035404.20	AL121988.10
AL161793.9	AL355149.13	AL136373.21	RP5-837O21.9	AL035405.13	AL122001.32
AL354743.33	AL356361.21	AL137790.4	RP5-890O3.3	AL035413.19	AL135927.14
AL355149.13	AL356390.24	AL137792.11	AL117336.22	AL035414.30	AL136373.21
AL356004.9	AL356458.13	AL137798.8	AL160287.18	AL035704.9	AL137790.4
AL356072.21	AL356748.20	AL137802.7	AL355493.14	AL049576.19	AL138795.21
AL356458.13	AL356953.17	AL138795.21	AL450306.14	AL096829.17	AL139130.28
AL356953.17	AL356957.27	AL139130.28	AL450311.11	AL109843.25	AL139138.17
AL356957.27	AL358813.13	AL139138.17	AL592430.8	AL118511.25	AL139139.9
AL357493.8	AL359553.14	AL139288.15	NEURL	AL121988.10	AL139288.15
AL358434.16	AL359704.9	AL158837.14	NEUROG3	AL135927.14	AL139415.10
AL358813.13	AL359815.26	AL160004.18	RP11-343J3.3	AL136373.21	AL157904.24
AL359758.15	AL359839.4	AL161793.9	RP11-343J3.4	AL137798.8	AL160004.18
AL359771.27	AL389925.10	AL354712.18	RP11-343J3.5	AL138795.21	AL161793.9
AL390119.25	AL390119.25	AL354713.7	RP11-507K13.4	AL139130.28	AL162430.15
AL390719.47	AL390719.47	AL354743.33	RP11-96F8.1	AL139138.17	AL354702.7
AL390728.37	AL391357.20	AL355149.13	AP001781.5	AL139288.15	AL354713.7
AL445183.19	AL442065.11	AL355274.22	AP006285.2	AL157904.24	AL354743.33
AL450992.17	AL445230.11	AL355538.13	GSTP1	AL160004.18	AL355149.13
AL451067.12	AL445490.6	AL356280.21	MUC5AC	AL160059.7	AL355871.6
AL451074.13	AL451050.8	AL356289.6	PGA3	AL161793.9	AL356390.24
AL513488.11	AL451054.22	AL356361.21	SLC22A12	AL353604.18	AL356441.16
AL513526.19	AL512785.7	AL356378.17	AC006517.46	AL354712.18	AL356458.13
AL590560.9	AL513480.21	AL356387.16	AC090642.11	AL354713.7	AL356583.28
AL590667.7	AL513526.19	AL356390.24	AICDA	AL354743.33	AL356748.20
AL591845.27	AL589763.6	AL356748.20	C12orf35	AL355149.13	AL356953.17
AL592207.9	AL589765.19	AL356953.17	C3AR1	AL356361.21	AL356957.27
AL592284.10	AL589986.3	AL356957.27	LHX5	AL356387.16	AL359704.9
AL592295.25	AL590667.7	AL357835.11	PRB1	AL356389.20	AL359837.21
AL592309.24	AL591122.20	AL358492.19	PRMT8	AL356390.24	AL359839.4
AL592436.7	AL591415.9	AL358813.13	SLC6A13	AL356441.16	AL360270.18
AL592464.24	AL591463.7	AL359553.14	ZNF605	AL356458.13	AL365331.9
AL596177.4	AL591647.14	AL359704.9	GRK1	AL356693.37	AL365361.12
AL596222.13	AL591893.3	AL365264.13	MCF2L	AL356748.20	AL390719.47
AL603832.28	AL591893.9	AL365361.12	AB019437.1	AL356953.17	AL391058.25
AL645859.10	AL592207.9	AL390119.25	AE000658.1	AL356957.27	AL445183.19
AL663102.4	AL592284.10	AL390719.47	AL121809.6	AL358253.16	AL445650.9
AL669831.13	AL592436.7	AL391357.20	AL133501.6	AL358813.13	AL450992.17
AL691442.32	AL592464.24	AL445230.11	AL135998.6	AL359541.11	AL451043.14
AL713899.14	AL596087.11	AL445650.9	AL136038.5	AL359551.13	AL451054.22
AL954711.3	AL596177.4	AL445673.9	AL138479.2	AL360270.18	AL589986.3
ALDH9A1	AL606491.19	AL451043.14	AL139785.5	AL365361.12	AL591122.20
ALPL	AL606537.10	AL451050.8	AL160471.6	AL390719.47	AL591521.8
ALX3	AL607067.17	AL451051.6	NID2	AL390728.37	AL591704.5
AMIGO1	AL669831.13	AL451054.22	PRPF39	AL391357.20	AL591704.7
ANKRD34A	AL672296.1	AL513320.30	ZFYVE1	AL445183.19	AL591893.3
ANKRD35	AL691442.32	AL513323.14	AC027020.12	AL445305.11	AL591893.9
ARF1	AL691479.15	AL513526.19	AC068446.22	AL445650.9	AL592207.9
ARHGAP29	AL713899.14	AL589765.19	AC107977.13	AL445673.9	AL592284.10
ARHGEF19	AL929472.21	AL589986.3	AC124312.5	AL450304.33	AL592309.24
ARV1	ALX3	AL590431.11	CYP1A1	AL450992.17	AL592436.7
ASCL5	ANXA9	AL590624.8	RASGRF1	AL451043.14	AL592464.24
ASTN1	ARHGAP30	AL590667.7	SNORD116-10	AL451051.6	AL596177.4
ATF3	ARHGEF16	AL590714.27	SNORD116-11	AL451054.22	AL603832.28
ATP2B4	ASCL5	AL591122.20	SNORD116-12	AL451067.12	AL645504.10
AVPR1B	ASTN1	AL591493.14	SNORD116-13	AL451139.40	AL645859.10
BAI2	ATF3	AL591704.5	SNORD116-14	AL513526.19	AL713899.14
BARHL2	BARHL2	AL591704.7	SNORD116-15	AL589763.6	AL713965.10
BCAN	BCAN	AL591893.3	SNORD116-3	AL589765.19	AL732363.8
BCAR3	BX284668.4	AL591893.9	AC018554.7	AL589986.3	ALX3
BMP8A	C1orf106	AL592146.8	AC025287.8	AL590624.8	ANKRD35
BMP8B	C1orf114	AL592207.9	AC026462.5	AL590965.17	ARHGAP29
BSND	C1orf120	AL592284.10	AC087190.5	AL591122.20	ARHGEF10L
BTG2	C1orf126	AL592309.24	AC120498.2	AL591521.8	ARHGEF11
BX284650.8	C1orf130	AL592436.7	AC130462.3	AL591893.3	ARPC5
BX284668.4	C1orf167	AL592464.24	SIAH	AL591893.9	ASCL5
BX323014.4	C1orf172	AL596177.4	ZFP1	AL592207.9	ASTN1
BX537254.7	C1orf175	AL606537.10	ZFP90	AL592284.10	ATF3
BXDC5	C1orf177	AL607067.17	AC006070.13	AL592295.25	ATP1B1
C1orf115	C1orf187	AL663102.4	AC006070.7	AL592309.24	ATP2B4
C1orf126	C1orf194	AL663123.1	AC006070.8	AL596177.4	AVPR1B
C1orf130	C1orf196	AL669831.13	AC018628.13	AL596224.10	BAI2
C1orf132	C1orf200	AL691442.32	AC073621.20	AL596275.10	BARHL2
C1orf133	C1orf32	AL691479.15	AC073621.3	AL603832.28	BCAN
C1orf134	C1orf34	AL713899.14	AC104564.11	AL603840.9	BCAR3
C1orf145	C1orf61	AL929472.21	AC132938.9	AL606537.10	BMP8A
C1orf152	C1orf76	AL953897.6	AOC2	AL645859.10	BSND
C1orf159	C1orf94	ALX3	AOC3	AL663102.4	BTG2
C1orf167	C1orf95	AMPD1	CCDC46	AL663123.1	BX284668.4
C1orf170	C1QA	ARHGEF16	CD300LF	AL713899.14	BX323860.7
C1orf173	C1QB	ASTN1	FN3K	AL732363.8	C1orf103
C1orf176	CACNA1E	ATAD3C	HEXDC	AL929472.21	C1orf106
C1orf177	CACNA1S	ATF3	NXN	ALPL	C1orf115
C1orf194	CADM3	AVPR1B	TP53I13	ALX3	C1orf120
C1orf196	CALML6	BAI2	C18orf2	AMPD1	C1orf126
C1orf200	CAPN8	BARHL2	NFATC1	ANKRD45	C1orf130
C1orf204	CASZ1	BCAN	AC008751.7	ARHGAP29	C1orf133
C1orf21	CCDC27	BMP8B	AC020910.7	ARHGEF10L	C1orf134
C1orf213	CCT3	BX284668.4	AC023172.1	ARTN	C1orf165
C1orf32	CD164L2	C1orf106	C19orf2	ASTN1	C1orf172
C1orf34	CD1D	C1orf120	C5AR1	ATF3	C1orf177
C1orf51	CD244	C1orf130	GLTSCR2	ATP1A2	C1orf185
C1orf53	CD53	C1orf134	GP6	ATXN7L2	C1orf187
C1orf59	CHD5	C1orf159	LGALS13	BAI2	C1orf190
C1orf61	CHIA	C1orf165	SNRP70	BARHL2	C1orf194
C1orf65	CHIT1	C1orf167	ZNF134	BCAN	C1orf196
C1orf76	CHRNB2	C1orf170	ZNF146	BCAR3	C1orf200
C1orf78	CNR2	C1orf172	ZNF180	BMP8A	C1orf32
C1orf92	CNTN2	C1orf175	ZNF211	BMP8B	C1orf34
C1orf95	COG2	C1orf186	ZNF225	BSND	C1orf51
CACHD1	COL8A2	C1orf187	ZNF347	BX284668.4	C1orf53
CACNA1E	CR1	C1orf194	ZNF565	BX323014.4	C1orf61
CACNA1S	CR1L	C1orf196	ZNF765	BX323860.7	C1orf65
CAMK1G	CR2	C1orf200	ZNF792	BX640550.4	C1orf76
CAMK2N1	CROCC	C1orf212	AC012075.10	BXDC5	C1orf92
CAPN2	CSF3R	C1orf222	AC018463.11	C1orf103	C1orf94
CASZ1	CSMD2	C1orf32	AC074008.5	C1orf106	C1orf95
CCDC19	CYP4Z1	C1orf34	AC092664.2	C1orf114	C1orf96
CCT3	DAB1	C1orf46	AC093642.5	C1orf115	C1QB
CD160	DCST1	C1orf61	AC097532.3	C1orf120	CA14
CD1D	DCST2	C1orf65	AC104665.3	C1orf126	CACHD1
CD34	DENND2D	C1orf76	AC104667.5	C1orf130	CACNA1E
CDKN2C	DLGAP3	C1orf94	C2orf44	C1orf133	CACNA1S
CELSR2	DMBX1	C1orf95	CNTNAP5	C1orf134	CADM3
CHD5	DMRTA2	C1QA	FKBP1B	C1orf14	CAMK1G
CITED4	DRD5P2	C1QB	IL1R2	C1orf159	CAMK2N1
CLSTN1	EDN2	C1QC	ING5	C1orf160	CAMSAP1L1
CMPK1	EFNA1	C4BPA	NMS	C1orf170	CAPN8
CNIH3	EFNA3	C4BPB	PDIA6	C1orf172	CASZ1
CNTN2	EPHA10	CA14	PRLH	C1orf183	CCT3
COL24A1	EPHA8	CACNA1E	ROCK2	C1orf187	CD1D
COL8A2	ESPN	CADM3	SNORD89	C1orf194	CD34
COL9A2	ESPNP	CALML6	TMSB10	C1orf196	CDA
CR1	ESRRG	CAMK1G	UBXN4	C1orf198	CGN
CR2	ETNK2	CAPN9	AL109954.15	C1orf212	CHD5
CRABP2	ETV3L	CASQ1	AL117372.35	C1orf32	CHIA
CREG1	F11R	CASZ1	AL121901.20	C1orf34	CHIT1
CROCCL1	F3	CATSPER4	AL139429.8	C1orf46	CHRNB2
CSF1	FAM43B	CCDC27	AL162615.13	C1orf53	CITED4
CSRP1	FAM5B	CCT3	BPI	C1orf61	CLSTN1
CYP2J2	FAM5C	CD164L2	C20orf201	C1orf65	CNIH3
CYP4B1	FAM78B	CD1D	C20orf51	C1orf68	CNN3
CYR61	FAM80A	CD244	CST11	C1orf76	CNTN2
DAB1	FCAMR	CD247	DEFB121	C1orf87	COL11A1
DDAH1	FCGR2A	CD34	EIF2S2	C1orf92	COL16A1
DDEFL1	FCRL4	CGN	FKBP1A	C1orf94	COL24A1
DENND2D	FCRL6	CHD5	FRG1B	C1orf95	COL8A2
DFFA	FOXD3	CHIT1	GLRXP	C1QA	COL9A2
DIRAS3	FOXO6	CHRNB2	OPRL1	C1QC	CR1
DLGAP3	GABRD	CNR2	PCMTD2	C8A	CR1L
DMRTA2	GFI1	CNTN2	RP4-545L17.10	CA14	CRABP2
DNM3	GJB3	COG2	SF3A3P1	CACHD1	CRCT1
DRD5P2	GNG4	COL9A2	SPINT4	CACNA1E	CSMD2
DUSP10	GPR25	CR1	WFDC12	CADM3	CYMP
DUSP5P	GRHL3	CR1L	AC007663.29	CAMK1G	CYP2J2
DVL1	GRRP1	CR2	AL023802.1	CAMK2N1	CYP4X1
E2F2	GUCA2A	CRCT1	AL079295.1	CAMSAP1L1	CYR61
ECE1	GUCA2B	CROCCL1	BX324178.8	CAMTA1	DAB1
ECHDC2	GUK1	CSMD2	COMT	CASZ1	DDAH1
EDARADD	HAPLN2	CYP2J2	GRAMD4	CD160	DDEFL1
EDG1	HES2	CYP4A11	PRAME	CD1A	DIRAS3
EFNA1	HES3	DAB1	RP1-181C9.2	CD1B	DISC1
EFNA3	HES5	DARC	VPREB1	CD1D	DLGAP3
EGLN1	HFE2	DENND2D	XBP1	CDA	DMRTA2
EIF4G3	HIST3H2A	DLGAP3	AC016948.4	CDKN2C	DNM3
ENO1P	HIST3H2BB	DMBX1	AC097634.2	CELSR2	ECHDC2
EPB41	HOOK1	DMRTA2	AC131156.6	CHD5	EDARADD
EPHA10	HPCA	DRD5P2	AC138389.3	CHI3L2	EDG1
EPHA8	HPCAL4	EFNA1	AC144536.4	CHIA	EDN2
EPHB2	HTR6	EFNA3	DNAH12	CHRNB2	EFNA1
ERO1LB	IFI16	ELAVL4	GNB4	CITED4	EFNA3
ERRFI1	IGFN1	EPHA10	ITIH1	CNIH3	EGLN1
ESPN	IGSF21	EPHA8	AC116655.7	CNTN2	ELAVL4
ESRRG	IGSF3	ERO1LB	CRIPAK	COG2	ELF3
F3	IGSF9	ESPN	FIP1L1	COL11A1	ELTD1
FAF1	INSRR	ESPNP	FRYL	COL16A1	ENAH
FAM129A	IQGAP3	ESRRG	GLRB	COL8A2	ENO1
FAM131C	ITLN2	ETNK2	SPATA18	COL9A2	ENO1P
FAM159A	KANK4	F11R	TBC1D1	CR1	EPHA10
FAM43B	KCNA2	FAAH	AC022413.4	CR1L	EPHA2
FAM46C	KCNA3	FAM129A	AC114929.2	CR2	EPHA8
FAM5B	KCNJ10	FAM159A	IL6ST	CRABP2	EPHB2
FAM5C	KCNJ9	FAM43B	SUB1	CRCT1	ERRFI1
FAM72A	KCNN3	FAM5B	TAS2R1	CRNN	ESRRG
FAM72B	KCNQ4	FAM5C	ZNF300	CROCCL1	ETNK2
FAM78B	KIAA1324	FAM71A	AL033519.42	CSF1	F3
FAM80A	KIAA1751	FAM78B	BRPF3	CSMD2	FAAH
FAM89A	KIF21B	FAM80A	COL9A1	CTA-215D11.4	FAM131C
FCRLB	KIF26B	FBXO2	GCNT2	CYP2J2	FAM159A
FGR	KLHDC8A	FBXO44	HLA-DPB1	CYP4X1	FAM43B
FMN2	KNCN	FCAMR	RHAG	CYR61	FAM5B
FNDC5	LAD1	FCGR3A	RP11-350J20.4	DAB1	FAM5C
FOXD2	LDLRAD1	FCRL1	AC004082.1	DDAH1	FAM69A
FOXD3	LELP1	FCRL4	AC073343.6	DDEFL1	FAM78B
FOXE3	LEMD1	FCRL6	AC093619.5	DEGS1	FAM80A
FOXO6	LGR6	FMO1	AC095044.3	DHRS3	FASLG
FUCA1	LHX4	FOXD3	CCL26	DIRAS3	FBLIM1
G0S2	LHX8	FOXO6	CYP3A5	DLGAP3	FGR
GABRD	LHX9	GABRD	DBF4	DMRTA2	FMN2
GBA	LIN28	GFI1	MUC17	DNAJC6	FMOD
GFI1	LINGO4	GJA4	MUC3A	DRD5P2	FNBP1L
GIPC2	LMX1A	GJA8	PMS2CL	DVL1	FNDC5
GJB3	LOR	GJB3	PON2	ECE1	FOXD2
GLIS1	LRP8	GJB4	RBAK	ECHDC2	FOXD3
GLT25D2	LRRC38	GJB5	SLC25A40	EDG1	FOXE3
GNG12	LRRC47	GNG4	STARD3NL	EDN2	FOXO6
GPR137B	LRRN2	GPR137B	TFAMP1	EFNA3	G0S2
GPR153	MAD2L2	GPR153	ZNF12	EGLN1	GABRD
GPR157	MANEAL	GPR25	AC068587.16	ELTD1	GFI1
GPR161	MAP3K19	GPR37L1	AC083982.13	ENAH	GIPC2
GPR177	MFSD4	GPR88	AC084116.7	EPHA10	GJA4
GPR88	MMEL1	GRHL3	AC084125.9	EPHA2	GJB3
GPX7	MYCL1	GRIK3	AC093331.9	EPHA8	GJB5
GREM2	MYOG	GRRP1	AC104339.10	EPHB2	GLIS1
GRHL3	MYOM3	GUCA2A	AF186192.4	ERRFI1	GLT25D2
GRIK3	NES	GUCA2B	AF279874.3	ESPN	GNG12
GRRP1	NFIA	HAPLN2	CHRNA2	ESRRG	GNG4
GSTM3	NHLH2	HCRTR1	DPY19L4	EVI5	GPR137B
GUK1	NKAIN1	HES2	LRRC6	F3	GPR153
HAPLN2	NMNAT2	HES3	LY6H	FAM131C	GPR177
HCRTR1	NPHS2	HES5	MLZE	FAM132A	GPR25
HES2	NPPB	HFE2	TCEB1	FAM159A	GPR37L1
HES4	NR5A2	HIST3H2BB	TMEM70	FAM19A3	GPR88
HES5	NT5C1A	HOOK1	XKR6	FAM43B	GPX7
HEYL	NTRK1	HPCA	ZNF252	FAM46B	GREM2
HFE2	NUP210L	HPCAL4	ZNF623	FAM5B	GRHL3
HHAT	OLFM3	HSD3B2	AL161454.10	FAM5C	GRIK3
HIVEP3	OPRD1	IGFN1	AL162231.20	FAM78B	HAO2
HLX	OPTC	IGSF21	AL353626.5	FAM80A	HAPLN2
HNRNPR	OR2B11	IGSF3	AL353795.13	FAM89A	HCRTR1
HPCA	PADI2	IGSF9	AL512625.10	FBLIM1	HES2
HPCAL4	PADI4	IL12RB2	C9orf144	FBXO2	HES3
HSPA6	PADI6	IL20	GLT6D1	FBXO44	HES4
HTR6	PANK4	IL28RA	RP11-354P17.8	FCRL4	HEYL
IER5	PAX7	INSRR	RP11-373A9.1	FCRL5	HHAT
IFI16	PCP4L1	IQGAP3	RP11-764K9.2	FH	HIVEP3
IGFN1	PCSK9	ITLN2	AC006987.2	FMN2	HLX
IGSF21	PGBD5	IVL	AC006987.4	FMO1	HMCN1
IL12RB2	PGLYRP3	KANK4	AC006987.5	FNDC5	HPCA
IL6R	PGLYRP4	KCNA10	AC019099.5	FOXD2	HPCAL4
INSRR	PIGR	KCNA2	AC134882.2	FOXD3	HTR6
ITPKB	PIK3CD	KCNA3	NA	FOXE3	ICMT
JUN	PKLR	KCNC4	NA	FOXO6	ID3
KANK4	PLA2G2D	KCND3	NA	G0S2	IFI16
KCNA2	PLA2G2F	KCNJ10	NA	GABRD	IGFN1
KCNA3	PLA2G5	KCNJ9	NA	GIPC2	IGSF21
KCNAB2	PLD5	KCNN3	NA	GJA4	IGSF3
KCNC4	PLEKHA6	KCNQ4	NA	GJB3	IL10
KCND3	POU3F1	KIAA1324	NA	GLIS1	IL28RA
KCNH1	PPAPR5	KIAA1751	NA	GLT25D2	IL6R
KCNJ10	PPT1	KIF21B	NA	GMEB1	INADL
KCNJ9	PRKCZ	KISS1	NA	GNG12	JUN
KCNK2	PROK1	KLHDC8A	NA	GNG4	KANK4
KCNQ4	PROX1	KNCN	NA	GPR137B	KCNA10
KIAA1324	PTCHD2	KPRP	NA	GPR153	KCNA2
KIAA1614	RAP1GAP	L1TD1	NA	GPR177	KCNA3
KIF17	RD3	LAD1	NA	GPR25	KCNC4
KIF26B	RGS21	LAX1	NA	GPR88	KCND3
KLHL17	RHBG	LCE2C	NA	GREM2	KCNH1
KNCN	RHOU	LCE2D	NA	GRHL3	KCNJ10
LAD1	RNF220	LCE5A	NA	GRIK3	KCNJ9
LDLRAP1	RORC	LCK	NA	GS1-304P7.1	KCNK1
LEFTY1	RP1-140J1.4	LDLRAD1	NA	GS1-304P7.2	KCNK2
LEPR	RP1-144F13.4	LELP1	NA	GSTM3	KCNN3
LGR6	RP1-52J10.9	LEMD1	NA	HAPLN2	KCNQ4
LHX4	RP1-8B22.2	LGR6	NA	HCRTR1	KCNT2
LHX8	RP11-105I12.1	LGTN	NA	HES2	KIAA1324
LHX9	RP11-108M9.5	LHX4	NA	HES3	KIAA1614
LIX1L	RP11-110J1.3	LHX8	NA	HES4	KIAA1751
LMOD1	RP11-115D7.3	LHX9	NA	HES5	KIF17
LMX1A	RP11-120D12.2	LIN28	NA	HFE2	KIF21B
LOR	RP11-130F5.1	LINGO4	NA	HHIPL2	KIF26B
LPGAT1	RP11-203F10.1	LMNA	NA	HMCN1	KIRREL
LRRC38	RP11-206L10.13	LMX1A	NA	HMGB4	KISS1
LRRC7	RP11-234N17.1	LOR	NA	HPCA	KNCN
LRRC8C	RP11-275O4.2	LRRC38	NA	HPCAL4	L1TD1
LRRN2	RP11-275O4.4	LRRC47	NA	HSD11B1	LAD1
LYST	RP11-2P2.1	LRRC7	NA	HSPA6	LAMC1
MAN1C1	RP11-319C21.1	LRRN2	NA	HTR6	LAMC2
MANEAL	RP11-325P15.2	MACF1	NA	ICMT	LCE5A
MAP3K19	RP11-343L14.2	MAD2L2	NA	ID3	LEMD1
MAP3K6	RP11-344H11.5	MANEAL	NA	IGFN1	LGR6
MAP7D1	RP11-38O14.5	MAP3K19	NA	IGSF21	LHX4
MAPKAPK2	RP11-395N6.2	MCOLN2	NA	IGSF3	LHX8
MCOLN2	RP11-404O13.2	MEX3A	NA	IL23R	LHX9
MCOLN3	RP11-439E19.4	MFSD4	NA	IL28RA	LIN28
MEGF6	RP11-450D21.2	MMEL1	NA	INSRR	LMOD1
METTL11B	RP11-451O13.1	MYOG	NA	IRF2BP2	LMX1A
MFSD2	RP11-485H8.2	MYOM3	NA	IVL	LOR
MFSD4	RP11-4M23.2	NES	NA	KANK4	LPHN2
MIXL1	RP11-520H14.1	NHLH2	NA	KCNA10	LRRC38
MMEL1	RP11-541H12.1	NKAIN1	NA	KCNA2	LRRC52
MMP23B	RP11-558F24.2	NMNAT2	NA	KCNC4	LRRC7
MOBKL2C	RP11-560O15.1	NOS1AP	NA	KCND3	LRRN2
MOSC2	RP11-57I17.3	NPHS2	NA	KCNH1	MACF1
MRPS15	RP11-5P18.2	NPPB	NA	KCNJ10	MAD2L2
MXRA8	RP11-5P18.3	NPR1	NA	KCNJ9	MAGI3
NAV1	RP11-8J9.5	NR1I3	NA	KCNK1	MAN1C1
NBL1	RP11-94F13.1	NR5A2	NA	KCNK2	MANEAL
NBPF11	RP3-332O11.1	NT5C1A	NA	KCNN3	MARK1
NBPF15	RP4-655C4.1	NTRK1	NA	KCNQ4	MCOLN2
NBPF3	RP4-666O22.1	OLFM3	NA	KIAA1324	MCOLN3
NBPF9	RP4-675G8.2	OPRD1	NA	KIAA1522	MEGF6
NFIA	RP4-675G8.3	OPTC	NA	KIAA1614	MFAP2
NGF	RP4-675G8.4	OR2AQ1P	NA	KIAA1751	MFSD4
NHLH2	RP4-796B4.1	OR2B11	NA	KIF17	MGST3
NID1	RP5-1125M8.6	OR2W5	NA	KIF1B	MMEL1
NKAIN1	RP5-1125M8.7	PADI2	NA	KIF26B	MOSC1
NOC2L	RP5-924G13.2	PADI4	NA	KLHL20	MOSC2
NOTCH2NL	RP5-934G17.6	PADI6	NA	KNCN	MPL
NPHP4	RSPO1	PANK4	NA	KPRP	MYCL1
NPHS2	RXRG	PAX7	NA	L1TD1	MYOG
NPL	S100A11	PCP4L1	NA	LAD1	MYOM3
NPR1	S100A12	PCSK9	NA	LAMB3	NAV1
NR5A2	S100A7L2	PCTK3	NA	LAMC1	NEGR1
NT5C1A	SDHB	PDPN	NA	LAMC2	NES
NTRK1	SELE	PGBD2	NA	LCE1A	NFASC
OBSCN	SHE	PGBD5	NA	LCE1E	NGF
OLFML2B	SLC30A10	PGLYRP4	NA	LCE1F	NHLH2
OPRD1	SLC30A2	PIGR	NA	LCE2B	NID1
OR10J5	SLC35F3	PIK3C2B	NA	LCE2D	NKAIN1
OR2T33	SLC44A5	PIK3CD	NA	LCE4A	NLRP3
OR2T6	SLC6A17	PKLR	NA	LCE5A	NMNAT2
OXCT2	SLC9A11	PLA2G2A	NA	LDLRAP1	NOS1AP
PADI2	SUSD4	PLA2G2C	NA	LELP1	NPHS2
PANK4	SYCP1	PLA2G2D	NA	LEMD1	NPPB
PAX7	SYPL2	PLA2G2F	NA	LGR6	NPR1
PCP4L1	SYT2	PLD5	NA	LHX4	NR5A2
PCSK9	SYT6	PLEKHA6	NA	LHX8	NT5C1A
PDE4B	TAL1	PLXNA2	NA	LHX9	NTNG1
PDE4DIP	TCHH	POU3F1	NA	LIN28	NTRK1
PDIK1L	TCHHL1	PPAPR5	NA	LMNA	NUAK2
PDPN	TDRD10	PPT1	NA	LMOD1	OLFML2B
PDZK1P1	TDRD5	PRAMEF12	NA	LMX1A	OPRD1
PEAR1	TLR5	PRDM16	NA	LOR	PADI2
PER3	TMEM51	PRKCZ	NA	LPHN2	PAX7
PEX14	TMEM52	PROK1	NA	LRRC38	PCP4L1
PGBD5	TMEM78	PROX1	NA	LRRC52	PCTK3
PHC2	TNFRSF8	PRR9	NA	LRRC7	PDE4B
PHLDA3	TNNI1	PTCHD2	NA	LRRN2	PDE4DIP
PIK3CD	TNNT2	PTGER3	NA	LUZP1	PDPN
PKP1	TNRC4	RAP1GAP	NA	LY9	PGBD5
PLD5	TP73	RD3	NA	MACF1	PGLYRP3
PLEKHN1	TRIM63	REG4	NA	MAD2L2	PGLYRP4
PLXNA2	TRIM67	REN	NA	MAGI3	PHGDH
PODN	TTC22	RHBG	NA	MAN1C1	PIK3C2B
POLR3GL	TTC34	RHOU	NA	MANEAL	PIK3CD
POU3F1	TTLL10	RN5S1	NA	MARK1	PIK3R3
PPFIA4	UBXD3	RNF220	NA	MCOLN2	PKP1
PPIE	USF1	RORC	NA	MCOLN3	PLA2G2A
PRDM16	VANGL2	RP1-118J21.24	NA	MECR	PLA2G2D
PRDM2	VASH2	RP1-140J1.4	NA	METTL11B	PLA2G5
PROX1	VWA5B1	RP1-144C9.2	NA	MEX3A	PLD5
PRRX1	WDR63	RP1-144F13.4	NA	MFAP2	PLEKHG5
PTCHD2	WDR8	RP1-21K4.1	NA	MFSD4	PLEKHO1
PTGER3	WNT3A	RP1-21O18.1	NA	MMEL1	PLXNA2
PTGFR	WNT4	RP1-223H12.4	NA	MMP23B	PM20D1
PTPRF	WNT9A	RP1-52J10.9	NA	MOSC2	PMF1
PTPRU	Z99291.1	RP1-8B22.1	NA	MXRA8	PODN
RAB7L1	ZNF683	RP1-8B22.2	NA	MYCL1	POU3F1
RAP1GAP	ZP4	RP11-105I12.1	NA	NAV1	PPAP2B
RASSF5	A1CF	RP11-110J1.3	NA	NES	PPAPR5
RBP7	AC022532.13	RP11-115D7.3	NA	NFASC	PRDM16
RCC2	AC068707.7	RP11-120D12.2	NA	NGF	PRDX1
RCSD1	AC073366.4	RP11-130F5.1	NA	NHLH2	PRELP
RGS16	AC073585.8	RP11-134G8.2	NA	NID1	PRKAA2
RHBG	ADARB2	RP11-149P14.1	NA	NKAIN1	PRKCZ
RHOC	ADRB1	RP11-14N7.3	NA	NMNAT2	PROK1
RHOU	AL133387.8	RP11-157D18.2	NA	NOS1AP	PROX1
RN5S1	AL135794.19	RP11-165H20.4	NA	NPHS2	PRR9
RN5S9	AL136368.24	RP11-191G24.2	NA	NPL	PRRX1
RNF2	AL139281.7	RP11-196G18.1	NA	NPPB	PSMB2
RNF207	AL139815.12	RP11-203F10.1	NA	NPR1	PTCHD2
RNF220	AL161645.14	RP11-206L10.13	NA	NR5A2	PTGFR
RORC	AL353801.13	RP11-215I23.4	NA	NT5C1A	PTGFRN
RP1-118J21.24	AL355863.18	RP11-223J15.2	NA	NTNG1	PTPN14
RP1-144F13.4	AL356632.12	RP11-234N17.1	NA	NTRK1	PTPRF
RP1-21O18.1	AL359832.33	RP11-243M12.1	NA	OLFM3	PTPRU
RP1-8B22.2	AL390294.19	RP11-275O4.4	NA	OPRD1	RAB3B
RP11-14N7.3	AL391005.9	RP11-276E17.1	NA	OTUD7B	RAB42
RP11-25K21.5	AL391499.11	RP11-288L9.3	NA	PADI2	RASSF5
RP11-284L19.1	AL392043.21	RP11-290P14.2	NA	PALMD	RBP7
RP11-289I10.2	AL445199.37	RP11-293F5.2	NA	PANK4	RCAN3
RP11-293F5.2	AL450311.11	RP11-293F5.8	NA	PAX7	REG4
RP11-293F5.4	AL512272.15	RP11-293G6__B.2	NA	PCP4L1	RGL1
RP11-318C24.1	AL583860.7	RP11-293G6__B.3	NA	PCSK9	RGS2
RP11-325P15.2	AL589794.7	RP11-2P2.1	NA	PDE4B	RGS4
RP11-34P13.11	AL590439.12	RP11-301M17.1	NA	PDE4DIP	RGS7
RP11-404O13.2	AL592071.12	RP11-306I1.1	NA	PDPN	RHBG
RP11-459K23.1	AL731557.7	RP11-319C21.1	NA	PEAR1	RHOU
RP11-472F19.1	AL731567.6	RP11-323D18.4	NA	PGBD5	RNF207
RP11-488L18.5	AL732479.6	RP11-325P15.1	NA	PIK3R3	RNF220
RP11-495P10.4	AL845259.22	RP11-325P15.2	NA	PKP1	ROR1
RP11-4M23.2	ALOX5	RP11-340B24.3	NA	PLA2G2A	RORC
RP11-518D3.4	ANTXRL	RP11-342M1.6	NA	PLA2G2C	RP1-140J1.4
RP11-520H14.1	ATRNL1	RP11-342M1.7	NA	PLA2G2D	RP1-21O18.1
RP11-545A16.3	BUB3	RP11-343L14.2	NA	PLA2G5	RP1-223H12.4
RP11-54O7.10	BX322534.3	RP11-344H11.5	NA	PLD5	RP11-105I12.1
RP11-564A8.4	C10orf122	RP11-350E19.1	NA	PLEKHG5	RP11-118H4.1
RP11-666A1.4	C10orf132	RP11-366L18.1	NA	PLEKHM2	RP11-144L1.2
RP11-69E11.7	C10orf27	RP11-38O14.5	NA	PLEKHN1	RP11-14N7.3
RP11-710N8.2	C10orf35	RP11-393I23.1	NA	PLEKHO1	RP11-165H20.4
RP11-744H18.2	C10orf53	RP11-395N6.2	NA	PLXNA2	RP11-169K16.6
RP11-763B22.7	C10orf64	RP11-403P14.1	NA	PM20D1	RP11-183G22.3
RP11-763B22.8	C10orf81	RP11-404F10.1	NA	PMF1	RP11-203F10.1
RP11-89F3.3	C10orf90	RP11-404O13.2	NA	PODN	RP11-213P13.1
RP11-94I2.2	C10orf92	RP11-410C4.1	NA	POU3F1	RP11-224O19.5
RP4-609E1.3	CALML5	RP11-410C4.2	NA	PPAPR5	RP11-234N17.1
RP4-631H13.4	CDH23	RP11-410C4.3	NA	PPFIA4	RP11-293F5.2
RP4-631H13.6	CHAT	RP11-419N10.3	NA	PPIE	RP11-295G20.1
RP4-654C18.1	CPN1	RP11-422P24.1	NA	PPM1J	RP11-296O14.1
RP4-657D16.4	CPXM2	RP11-423O2.1	NA	PRDM16	RP11-2P2.1
RP4-657D16.5	CRTAC1	RP11-423O2.2	NA	PRKAA2	RP11-301M17.1
RP4-666O22.1	CTB-1144G6.5	RP11-423O2.3	NA	PRKCZ	RP11-301M17.2
RP4-672J20.2	CTNNA3	RP11-423O2.4	NA	PROX1	RP11-302I18.1
RP4-680D5.3	CYP26A1	RP11-426M1.2	NA	PRRX1	RP11-306I1.1
RP4-683M8.1	CYP26C1	RP11-439E19.4	NA	PSMB2	RP11-325P15.2
RP4-740O15.1	DRD1IP	RP11-451O13.1	NA	PTCHD2	RP11-331H2.4
RP4-788L13.1	DRGX	RP11-478H16.1	NA	PTGER3	RP11-334A14.2
RP4-800M22.3	FBXL15	RP11-492M19.1	NA	PTGFR	RP11-334A14.3
RP5-1068B5.1	FGF8	RP11-495P10.4	NA	PTGFRN	RP11-340B24.3
RP5-915N17.3	FOXI2	RP11-496D1.2	NA	PTPN14	RP11-395N6.2
RP5-920G3.2	FRMPD2	RP11-4M23.2	NA	PTPRF	RP11-404O13.2
RP5-998N21.3	GAD2	RP11-520H14.1	NA	PTPRU	RP11-435P24.2
RPA2	GATA3	RP11-541H12.1	NA	RAB3B	RP11-480I12.6
RPL22	GDF2	RP11-545A16.3	NA	RAP1GAP	RP11-486B10.4
RSPO1	GPR120	RP11-558F24.2	NA	RASSF5	RP11-492I2.1
RUNX3	GPR123	RP11-560O15.1	NA	RBP7	RP11-495P10.4
RXRG	GPR26	RP11-567B20.2	NA	RGL1	RP11-496D1.2
RYR2	GPRIN2	RP11-576D8.1	NA	RGS16	RP11-4M23.2
S100A10	GRID1	RP11-57I17.2	NA	RGS4	RP11-545A16.3
SAMD11	HMX2	RP11-57I17.3	NA	RGS7	RP11-564A8.4
SCP2	HMX3	RP11-5P18.10	NA	RGS8	RP11-763B22.7
SEMA6C	HPSE2	RP11-5P18.2	NA	RHOU	RP11-763B22.8
SERTAD4	IL9RP2	RP11-5P18.3	NA	RIMS3	RP4-609E1.3
SFN	INA	RP11-666A1.4	NA	RNF207	RP4-631H13.4
SGIP1	KCNK18	RP11-69P2.1	NA	ROR1	RP4-631H13.6
SH2D2A	KNDC1	RP11-763B22.7	NA	RP1-118J21.24	RP4-633H17.1
SH2D5	LBX1	RP11-763B22.8	NA	RP1-144F13.4	RP4-633H17.2
SHE	LRRC18	RP11-7G12.1	NA	RP1-20N18.4	RP4-666O22.1
SKI	LRRC22	RP11-86H7.2	NA	RP1-21O18.1	RP4-672J20.2
SLC30A10	LYZL1	RP11-8J9.5	NA	RP1-43O17.1	RP4-675G8.3
SLC30A2	MAPK8	RP11-96K19.3	NA	RP1-43O17.2	RP4-675G8.4
SLC35F3	MAT1A	RP3-455J7.1	NA	RP1-8B22.2	RP4-683M8.1
SLC44A5	MSMB	RP4-646B12.2	NA	RP11-101J8.2	RP4-697E16.1
SLC45A1	MXI1	RP4-665N4.5	NA	RP11-130F5.1	RP4-700A9.1
SLC6A17	MYO3A	RP4-672J20.2	NA	RP11-14N7.3	RP4-788L13.1
SMYD2	NEURL	RP4-675G8.2	NA	RP11-183G22.3	RP4-796B4.1
SNFT	NEUROG3	RP4-796B4.1	NA	RP11-234N17.1	RP5-1000E10.4
SOAT1	NKX1-2	RP4-801G22.3	NA	RP11-290P14.2	RP5-1068B5.1
SPSB1	NKX2-3	RP5-1065P14.1	NA	RP11-293F5.2	RP5-1097F14.1
ST6GALNAC5	NODAL	RP5-1068B5.1	NA	RP11-295G20.1	RP5-1125M8.7
SUSD4	NRAP	RP5-1097F14.1	NA	RP11-301M17.1	RP5-1155K23.1
SYCP1	NRG3	RP5-1099E6.2	NA	RP11-306I1.1	RP5-857K21.10
SYPL2	OGDHL	RP5-1118D24.2	NA	RP11-325P15.2	RP5-857K21.11
SYT2	OR13A1	RP5-1125M8.6	NA	RP11-331H2.4	RP5-857K21.14
SYT6	OR6D2P	RP5-1155K23.1	NA	RP11-340B24.3	RP5-857K21.6
SYTL1	PAX2	RP5-827C21.1	NA	RP11-375F2.1	RP5-857K21.7
TACSTD2	PCDH21	RP5-837O21.9	NA	RP11-385M4.3	RP5-857K21.8
TAGLN2	PDZD8	RP5-848E13.1	NA	RP11-395N6.2	RSPO1
TAL1	PHYHIPL	RP5-871G17.5	NA	RP11-404O13.2	RXRG
TARBP1	PKD2L1	RP5-871G17.6	NA	RP11-410C4.1	RYR2
TBX15	PPAPDC1A	RP5-884C9.3	NA	RP11-410C4.2	S100A12
TCEA3	PPYR1	RP5-915N17.3	NA	RP11-467I20.4	S100A7L2
TCHH	PRAP1	RP5-934G17.6	NA	RP11-474I16.4	S100A8
TDRD10	PRKCQ	RPA2	NA	RP11-480I12.6	S100A9
TDRD5	PRLHR	RPS6KA1	NA	RP11-488L18.5	SAMD11
TFAP2E	PRPF18	RSPO1	NA	RP11-4M23.2	SCP2
TGFB2	PSD	RUNX3	NA	RP11-505O17.1	SERINC2
TGFBR3	PTF1A	RXRG	NA	RP11-505O17.3	SERTAD4
THEM5	RASGEF1A	S100A7L2	NA	RP11-541H12.1	SGIP1
TMCC2	RET	S100A8	NA	RP11-545A16.3	SH2D5
TMCO4	RP11-104F15.7	S100A9	NA	RP11-54O7.10	SHE
TMEM200B	RP11-108B14.1	SAMD11	NA	RP11-710N8.2	SLC25A24
TMEM51	RP11-108B14.2	SCYL3	NA	RP11-763B22.7	SLC26A9
TMEM54	RP11-108B14.3	SELE	NA	RP11-763B22.8	SLC30A10
TMEM61	RP11-122K13.8	SHE	NA	RP11-8J9.5	SLC30A2
TMEM63A	RP11-242G20.2	SLAMF1	NA	RP11-96K19.3	SLC35F3
TNFRSF18	RP11-33K5.1	SLAMF8	NA	RP3-410I8.1	SLC44A3
TNFRSF1B	RP11-343J3.3	SLC30A2	NA	RP4-595K12.2	SLC44A5
TNFRSF8	RP11-343J3.4	SLC35F3	NA	RP4-609E1.2	SLC45A1
TNFRSF9	RP11-343J3.5	SLC44A3	NA	RP4-609E1.3	SLC6A17
TNFSF4	RP11-343J3.6	SLC44A5	NA	RP4-631H13.4	SNFT
TNRC4	RP11-343J3.7	SLC5A9	NA	RP4-631H13.5	SNX7
TP73	RP11-351M16.2	SLC6A17	NA	RP4-631H13.6	SORT1
TRAPPC3	RP11-36N22.1	SNFT	NA	RP4-666O22.1	SOX13
TRIM17	RP11-399N22.3	SPRR4	NA	RP4-672J20.2	SPATA6
TRIM67	RP11-432I13.3	SUSD4	NA	RP4-683M8.1	SPRR1B
TSSK3	RP11-445N18.9	SV2A	NA	RP4-788L13.1	SPRR2D
TTC13	RP11-479O17.7	SYCP1	NA	RP4-814E15.1	SPRR2E
TTC22	RP11-479O17.8	SYT2	NA	RP5-1068B5.1	SPRR2G
TTLL7	RP11-47G11.1	SYT6	NA	RP5-1097F14.1	SPRR3
USF1	RP11-47G11.3	SYTL1	NA	RP5-1125M8.5	SPSB1
VAV3	RP11-487I5.1	TAL1	NA	RP5-1125M8.6	ST6GALNAC3
VWA5B1	RP11-501J20.3	TAS1R2	NA	RP5-1155K23.1	ST6GALNAC5
WDR63	RP11-507K13.4	TCHH	NA	RP5-827C21.1	SUSD4
WDR8	RP11-508N22.4	TCHHL1	NA	RP5-915N17.3	SYCP1
WDTC1	RP11-543F8.1	TDRD10	NA	RP5-947P14.2	SYPL2
WNT2B	RP11-730A19.2	TDRD5	NA	RP5-964H19.1	SYT14
WNT3A	RP11-7D5.2	TEDDM1	NA	RP5-964H19.2	SYT2
WNT4	RP11-89K18.1	TEKT2	NA	RSPO1	SYT6
WNT9A	RP13-439H18.7	THEM5	NA	RXRG	TACSTD2
XX-CR54.2	SEPHS1	TLR5	NA	RYR2	TBX15
Z97195.1	SFMBT2	TMEM52	NA	S100A10	TCEA3
ZC3H12A	SFTPD	TMEM61	NA	SAMD11	TCHH
ZNF436	SLC16A9	TNFRSF14	NA	SARS	TDRD10
ZSWIM5	SLC18A2	TNFRSF8	NA	SCMH1	TDRD5
ZYG11A	SLC18A3	TNNI1	NA	SCP2	TFAP2E
ABLIM1	SLIT1	TNNT2	NA	SDC3	TGFB2
AC069540.6	SORCS3	TNRC4	NA	SERINC2	TGFBR3
ADAM12	SPAG6	TP73	NA	SERTAD4	TINAGL1
ADAMTS14	SYT15	TPM3	NA	SH2D5	TLR5
ADARB2	TLX1	TRIM17	NA	SHE	TMCC2
ADRA2A	TMEM10	TRIM63	NA	SKI	TMEM125
ADRB1	UCN3	TTC22	NA	SLC26A9	TMEM200B
AFAP1L2	UNC5B	TTC34	NA	SLC30A10	TMEM51
AIFM2	UTF1	TTLL10	NA	SLC30A2	TMEM54
AKR1CL2	VAX1	UBXD3	NA	SLC35F3	TMEM61
AL031601.2	VENTX	USF1	NA	SLC44A3	TNFRSF1B
AL121928.13	VWA2	VANGL1	NA	SLC44A5	TNFRSF8
AL133387.8	XX-2136C48.7	VANGL2	NA	SLC45A1	TNFRSF9
AL135794.19	XX-2136C48.8	VASH2	NA	SLC6A17	TNNT2
AL136368.24	XX-2136C77.1	VWA5B1	NA	SNFT	TNRC4
AL139281.7	ZNF488	WDR63	NA	SNX27	TP73
AL157395.17	ABCC8	WDR8	NA	SNX7	TRIM67
AL161936.15	ABCG4	WNT3A	NA	SOX13	TTC22
AL355861.19	AC013791.2	WNT4	NA	SPRR1A	TTC34
AL359832.33	AC023085.7	Z99297.1	NA	SPRR2A	TTLL10
AL360181.37	AC027804.7	ZNF678	NA	SPRR2F	UBL4B
AL365434.13	AC044839.16	ZP4	NA	SPRR2G	VANGL2
AL390294.19	AC060812.15	A1CF	NA	SPRR3	VASH2
AL391005.9	AC068205.25	AC012560.5	NA	SPRR4	VWA5B1
AL445199.37	AC084859.7	AC021037.6	NA	ST6GALNAC5	WDR63
AL512662.8	AC103710.2	AC022021.10	NA	SUSD4	WDR8
AL731557.7	AC109341.7	AC022532.13	NA	SYCP1	WNT2B
AL731567.6	AC132217.15	AC068058.12	NA	SYPL2	WNT3A
AL731696.4	AC138230.5	AC068707.7	NA	SYT14	WNT4
AL732479.6	ADAMTS8	AC068896.9	NA	SYT2	WNT9A
ALOX5	AL049635.8	AC073366.4	NA	SYT6	ZBTB8
ANKRD1	ALDH3B2	AC073585.8	NA	TACSTD2	ZNF648
ANTXRL	ALX4	ADAM8	NA	TAS1R2	ZNF678
ANXA11	ANKK1	ADARB2	NA	TBX15	ZNF684
APBB1IP	AP000479.5	ADRB1	NA	TCEA3	ZSWIM5
ARHGAP21	AP000593.4	AFAP1L2	NA	TCHH	ZYG11A
ARHGAP22	AP000679.7	AL121749.14	NA	TCHHL1	ABCC2
ARID5B	AP000818.4	AL133384.12	NA	TDRD10	ABLIM1
BICC1	AP000859.4	AL133387.8	NA	TDRD5	AC021037.6
BMI1	AP000867.15	AL135794.19	NA	TGFBR3	AC023283.10
BNIP3	AP000868.4	AL136368.24	NA	TLR5	AC073585.8
BUB3	AP000889.6	AL137186.18	NA	TMCC2	AC079955.9
C10orf11	AP001107.5	AL138764.21	NA	TMEM200B	ADAM12
C10orf114	AP001157.4	AL139125.18	NA	TMEM51	ADAMTS14
C10orf116	AP001453.6	AL139281.7	NA	TMEM54	ADARB2
C10orf125	AP001835.4	AL139815.12	NA	TMEM56	ADRA2A
C10orf132	AP001999.4	AL157395.17	NA	TMEM58	ADRB1
C10orf141	AP002348.3	AL158164.15	NA	TMEM61	AFAP1L2
C10orf18	AP002380.3	AL158835.11	NA	TNFRSF18	AL121749.14
C10orf25	AP002387.4	AL355376.6	NA	TNFRSF25	AL133387.8
C10orf30	AP002448.3	AL355493.14	NA	TNFRSF8	AL135794.19
C10orf53	AP002784.4	AL355863.18	NA	TNNT2	AL136368.24
C10orf54	AP002886.3	AL356214.20	NA	TNR	AL139281.7
C10orf56	AP002893.3	AL356632.12	NA	TNRC4	AL157395.17
C10orf57	AP002954.1	AL356865.19	NA	TP73	AL161936.15
C10orf67	AP002959.2	AL357148.22	NA	TRIM17	AL353664.14
C10orf72	AP003040.2	AL359385.28	NA	TRIM63	AL353801.13
C10orf88	AP003065.2	AL359759.19	NA	TRIM67	AL354873.19
C10orf97	AP003108.3	AL359832.33	NA	TTC34	AL355376.6
C1QL3	AP003175.2	AL360181.37	NA	UBE2Q1	AL355861.19
CACNB2	AP003402.3	AL365506.10	NA	UBXD3	AL356214.20
CAMK1D	AP003419.3	AL390294.19	NA	UHMK1	AL356865.19
CCDC147	AP003774.4	AL391005.9	NA	VAMP3	AL359832.33
CCDC3	AP004609.1	AL391137.11	NA	VASH2	AL360181.37
CDH23	AP006285.2	AL392043.21	NA	VTCN1	AL390294.19
CH25H	AP006288.1	AL445199.37	NA	VWA5B1	AL391005.9
CHAT	AP006296.1	AL450311.11	NA	WDR26	AL391099.12
CHST3	ASCL2	AL450337.24	NA	WDR63	AL391137.11
CNNM1	ASRGL1	AL512272.15	NA	WDR8	AL391421.27
CNNM2	ATHL1	AL592071.12	NA	WNT2B	AL445199.37
COL13A1	B3GAT1	AL691429.17	NA	WNT3A	AL450311.11
COMMD3	B3GNT6	AL731543.9	NA	WNT4	AL590439.12
CPXM2	B4GALNT4	AL731557.7	NA	WNT9A	AL691429.17
CRTAC1	BARX2	AL731567.6	NA	Z99291.1	AL731557.7
CTGLF4	BDNF	AL731696.4	NA	ZNF648	AL731567.6
CUEDC2	BSX	AL732437.12	NA	ZNF669	AL732375.18
CXCL12	C11orf35	AL732479.6	NA	ZNF678	AL732479.6
CYP26A1	C11orf40	ALOX5	NA	ZNF695	ALOX5
CYP26C1	C11orf9	ANTXRL	NA	ZSWIM5	ANTXRL
DKK1	C1QTNF4	ARMC3	NA	ZYG11A	ARHGAP12
DPYSL4	CABP2	ASB13	NA	A1CF	ARHGAP22
DRD1IP	CABP4	BMS1	NA	AC005879.3	ARMC4
DRGX	CADM1	BUB3	NA	AC011328.11	ATOH7
DUSP	CALCA	C10orf113	NA	AC016825.12	ATRNL1
EBF3	CCDC153	C10orf115	NA	AC021037.6	BAMBI
ECHS1	CCKBR	C10orf132	NA	AC067750.5	BICC1
EGR2	CD3D	C10orf35	NA	AC068058.12	BMI1
ELOVL3	CD3E	C10orf49	NA	AC073366.4	BMPR1A
EMX2	CD3G	C10orf53	NA	AC073585.8	BUB3
ENTPD7	CD5	C10orf57	NA	ADAM12	C10orf10
EXOC6	CHRDL2	C10orf64	NA	ADAMTS14	C10orf107
FAM53B	CHRM1	C10orf71	NA	ADARB2	C10orf114
FGF8	CNGA4	C10orf81	NA	ADRA2A	C10orf116
FOXI2	CSRP3	C10orf90	NA	ADRB1	C10orf120
FRAT1	DAGLA	C10orf92	NA	AFAP1L2	C10orf126
FRG2B	DBX1	C10orf93	NA	AL031601.3	C10orf132
GAD2	DCHS1	C10orf97	NA	AL121749.14	C10orf141
GATA3	DDX25	CALML5	NA	AL133387.8	C10orf30
GBF1	DGAT2	CCDC3	NA	AL135794.19	C10orf35
GDF10	DGKZ	CDH23	NA	AL136368.24	C10orf53
GFRA1	DRD2	CHAT	NA	AL139281.7	C10orf67
GPR120	DSCAML1	CRTAC1	NA	AL139405.11	C10orf72
GPR123	DTX4	CTB-1144G6.5	NA	AL160010.14	C10orf81
GPR158	FAM99A	CTNNA3	NA	AL161936.15	C10orf82
GPR26	FGF19	CUGBP2	NA	AL353600.10	C1QL3
GPRIN2	FGF3	CYP26A1	NA	AL353664.14	CACNB2
GRID1	FGF4	CYP26C1	NA	AL355376.6	CCDC3
GRK5	FOXR1	CYP2E1	NA	AL355500.20	CDH23
H2AFY2	FXYD6	DMBT1	NA	AL355861.19	CEP55
HABP2	GAL	DPYSL4	NA	AL356115.9	CH25H
HHEX	GAS2	DRD1IP	NA	AL356214.20	CHAT
HMX2	GLB1L2	DRGX	NA	AL356865.19	CHST3
HMX3	GLB1L3	DYDC1	NA	AL358790.22	CNNM1
HPSE2	GLYATL1	DYDC2	NA	AL359832.33	COL13A1
HSPA12A	GPR83	EMX2	NA	AL360181.37	CPXM2
HTR7	GRIK4	FBXL15	NA	AL390248.10	CRTAC1
HTRA1	GRM5	FGF8	NA	AL390294.19	CTB-1144G6.5
IFIT5	HNT	FOXI2	NA	AL390766.16	CUGBP2
IL15RA	HRASLS5	FRMPD2	NA	AL391005.9	CXCL12
INA	HTR3A	GAD2	NA	AL391099.12	CYP26A1
ITGA8	IGF2	GATA3	NA	AL391137.11	CYP26C1
ITIH5	IGSF9B	GDF10	NA	AL391421.27	CYP2E1
KAZALD1	IL10RA	GDF2	NA	AL392043.21	DHX32
KCNIP2	KCNA4	GPR120	NA	AL445199.37	DIP2C
KCNMA1	KCNC1	GPR123	NA	AL450307.18	DKK1
KIAA1217	KCNE3	GPR158	NA	AL450311.11	DLG5
KIAA1274	KCNK4	GPRIN2	NA	AL512622.9	DMBT1
KIAA1462	KCNQ1	GRID1	NA	AL603831.23	DOCK1
LBX1	KLHL35	H2AFY2	NA	AL691429.17	DPYSL4
LIPA	KRTAP5-10	HABP2	NA	AL713922.12	DRD1IP
LRRC20	KRTAP5-2	HMX2	NA	AL731557.7	DRGX
LRRC21	KRTAP5-3	HMX3	NA	AL731567.6	DYDC1
LRRTM3	KRTAP5-5	HPSE2	NA	AL731653.1	DYDC2
MAP3K8	KRTAP5-6	IL9RP2	NA	AL732375.18	EBF3
MEIG1	KRTAP5-7	INA	NA	AL732479.6	EGR2
MKX	KRTAP5-9	ITIH2	NA	AL845259.22	ELOVL3
MMS19	LMO1	KCNK18	NA	ALOX5	EMX2
MXI1	LRRC55	KIAA1217	NA	ANTXRL	ENTPD1
NEBL	LSP1	KNDC1	NA	ARHGAP22	FAM107B
NEURL	LUZP2	LBX1	NA	AS3MT	FAM13C1
NEUROG3	MAP6	LIPK	NA	ATOH7	FAM24A
NFKB2	MMP20	LRRC18	NA	ATRNL1	FANK1
NKX1-2	MPZL2	LRRC21	NA	BAMBI	FER1L3
NKX2-3	MRGPRE	LRRC22	NA	BICC1	FGF8
NKX6-2	MRGPRG	LRRTM3	NA	BMI1	FGFR2
NOC3L	MRGPRX2	MAT1A	NA	BMPR1A	FOXI2
NODAL	MS4A15	MMP21	NA	BNIP3	FRMD4A
NPM3	MS4A8B	MSMB	NA	BUB3	FZD8
NRG3	MUC5AC	MYO3A	NA	C10orf107	GAD2
NRP1	MYO7A	NEBL	NA	C10orf108	GATA3
OGDHL	MYOD1	NEURL	NA	C10orf116	GBF1
PAOX	NALP6	NEUROG3	NA	C10orf120	GDF10
PARD3	NELL1	NKX1-2	NA	C10orf122	GFRA1
PAX2	NRGN	NKX2-3	NA	C10orf132	GJD4
PCDH21	NRXN2	NODAL	NA	C10orf136	GPR120
PCGF5	ODF3	NRG3	NA	C10orf141	GPR123
PDLIM1	OR10A4	OAT	NA	C10orf22	GPR158
PDZD7	OR10D4P	OGDHL	NA	C10orf38	GPR26
PFKFB3	OR2AT4	OR13A1	NA	C10orf53	GPRIN2
PFKP	OR4D9	PAX2	NA	C10orf67	GRID1
PHYHIPL	OR51A2	PCDH21	NA	C10orf72	GRK5
PIP5K2A	OR51A3P	PDE6C	NA	C10orf82	H2AFY2
PITX3	OR51A5P	PHYHIPL	NA	C10orf88	HABP2
PLAC9	OR51I2	PIK3AP1	NA	C10orf90	HMX2
PLAU	OR51L1	PKD2L1	NA	C10orf92	HMX3
PLCE1	OR52E2	PNLIPRP2	NA	C10orf93	HPSE2
PPA1	OR52E3P	PPAPDC1A	NA	C10orf96	HSPA12A
PPAPDC1A	OR52E4	PPYR1	NA	C10orf97	HTR7
PPP1R3C	OR52L2P	PRAP1	NA	C1QL3	HTRA1
PPYR1	OR52M1	PRKCQ	NA	CACNB2	INA
PRKG1	OR56A1	PRLHR	NA	CAMK2G	ITGA8
PRLHR	OTOG	PRPF18	NA	CCDC147	ITIH5
PTF1A	OVOL1	PSD	NA	CCDC3	KCNMA1
PTPRE	P2RX3	PTCHD3	NA	CCDC7	KIAA1217
RASGEF1A	PAX6	PTF1A	NA	CCNY	KIAA1274
RBP4	PDE2A	RASGEF1A	NA	CDH23	KIAA1462
RET	PDZD3	RBP4	NA	CEP55	KNDC1
RGS10	PGA3	RET	NA	CH25H	LBX1
RHOBTB1	PGA4	RP11-108B14.1	NA	CHAT	LGI1
RP11-108K14.7	PGR	RP11-108B14.2	NA	CHST3	LRRTM3
RP11-170J3.2	PHOX2A	RP11-122K13.8	NA	COL13A1	MAT1A
RP11-382K22.1	PLEKHA7	RP11-159H3.1	NA	CPXM2	MKX
RP11-453N3.1	POU2F3	RP11-186O14.5	NA	CRTAC1	MMS19
RP11-478K7.1	PRG2	RP11-20E23.2	NA	CTB-1144G6.5	MSMB
RP11-479O17.7	PRG3	RP11-215C7.3	NA	CTNNA3	MYO3A
RP11-479O17.8	PRPF19	RP11-242G20.2	NA	CUGBP2	NEBL
RP11-47G11.1	PTPN5	RP11-292F22.2	NA	CXCL12	NEURL
RP11-47G11.3	PUS3	RP11-2K17.5	NA	CYP26A1	NEUROG3
RP11-48B24.2	RAB39	RP11-316M21.8	NA	CYP26C1	NKX1-2
RP11-507K13.4	RASSF7	RP11-324H6.4	NA	CYP2E1	NKX2-3
RP11-543N17.2	RIC3	RP11-33K5.1	NA	DIP2C	NKX6-2
RP11-98I6.2	ROBO3	RP11-343J3.3	NA	DKK1	NODAL
RPL7AP8	RP1-53C18.3	RP11-343J3.4	NA	DLG5	NRG3
SEC31B	SAA3P	RP11-343J3.5	NA	DMBT1	NRP1
SFMBT2	SAA4	RP11-343J3.6	NA	DPYSL4	OGDHL
SFRP5	SCGB1C1	RP11-343J3.7	NA	DRD1IP	PARD3
SFXN3	SCGB1D1	RP11-351M16.1	NA	DRGX	PAX2
SH3PXD2A	SCGB1D2	RP11-359B3.1	NA	DUSP	PCDH21
SLC16A12	SCGB1D4	RP11-445N18.9	NA	DYDC1	PCGF5
SLC18A2	SCN2B	RP11-445P17.6	NA	DYDC2	PFKFB3
SLC18A3	SCN3B	RP11-449I17.5	NA	EBF3	PHYHIPL
SLIT1	SCN4B	RP11-479O17.7	NA	EGR2	PITX3
SORCS1	SLC17A6	RP11-479O17.8	NA	ELOVL3	PLAC9
SORCS3	SLC1A2	RP11-47G11.3	NA	EMX2	PLAU
SPAG6	SLC22A12	RP11-499O7.5	NA	FAM107B	PLCE1
SPOCK2	SLC22A6	RP11-501J20.3	NA	FAM13C1	PLEKHA1
SPRN	SLC6A5	RP11-507K13.4	NA	FAM24A	PLEKHK1
ST8SIA6	SLCO2B1	RP11-56H7.3	NA	FAM24B	PLXDC2
STK32C	SORL1	RP11-5G18.2	NA	FANK1	PPAPDC1A
STOX1	SPON1	RP11-748L13.2	NA	FBXL15	PPP1R3C
SVIL	SPTBN2	RP11-753C18.4	NA	FER1L3	PPYR1
SYCE1	SSRP1	RP11-753C18.7	NA	FGF8	PRKG1
SYT15	ST14	RP11-89K18.1	NA	FGFR2	PRLHR
TBC1D12	SYT13	RP13-439H18.7	NA	FOXI2	PRPF18
TCERG1L	SYT9	RP5-1051H14.1	NA	FRG2B	PTF1A
TLL2	TBX10	SEC31B	NA	FRMD4A	PTPRE
TLX1	TMEM109	SEPHS1	NA	FZD8	RASGEF1A
TMEM20	TMEM151A	SFMBT2	NA	GAD2	RASSF4
TMEM26	TMEM16J	SFRP5	NA	GATA3	RBP4
TSPAN15	TMEM45B	SFTPD	NA	GBF1	RET
TYSND1	TPH1	SH2D4B	NA	GDF10	RHOBTB1
UBTD1	TRIM29	SH3PXD2A	NA	GFRA1	RP11-139K1.2
UNC5B	TRPM5	SLC18A2	NA	GJD4	RP11-14C22.4
UTF1	UBE2L6	SLC18A3	NA	GPR120	RP11-157J13.1
VAX1	USH1C	SLIT1	NA	GPR123	RP11-215A21.2
VENTX	USP2	SORCS1	NA	GPR158	RP11-256K7.1
VWA2	VSIG2	SORCS3	NA	GPR26	RP11-314P12.3
XX-2136C111.2	WIT1	SPAG6	NA	GPRIN2	RP11-343J3.3
ZEB1	WNT11	STOX1	NA	GRID1	RP11-343J3.4
ZFYVE27	WT1	SYT15	NA	GRK5	RP11-343J3.5
ZMIZ1	YIF1A	TACC2	NA	H2AFY2	RP11-343J3.6
ZMYND11	ZBTB16	TACR2	NA	HECTD2	RP11-343J3.7
ZNF22	ZP1	TCERG1L	NA	HMX2	RP11-359B3.1
ZNF239	AC002351.2	TLX1	NA	HMX3	RP11-36D19.4
ZNF32	AC005343.1	TMEM10	NA	HPSE2	RP11-36N22.1
ZNF503	AC005805.12	TMEM180	NA	HSPA12A	RP11-397J18.1
ABCC8	AC005908.1	UCN3	NA	HTR7	RP11-399K21.5
ABCG4	AC006511.5	UNC5B	NA	HTRA1	RP11-411P18.2
ABTB2	AC006517.46	UTF1	NA	INA	RP11-448K10.1
AC009656.11	AC007436.1	VAX1	NA	ITGA8	RP11-479O17.7
AC016450.10	AC007437.16	VENTX	NA	ITIH2	RP11-479O17.8
AC044839.16	AC007623.33	VWA2	NA	ITIH5	RP11-47G11.1
AC068205.25	AC008127.11	XX-2136C111.2	NA	KAZALD1	RP11-47G11.3
AC068580.3	AC009260.13	ZNF488	NA	KCNMA1	RP11-492M23.2
AC079296.5	AC010198.8	AADD01112371.1	NA	KIAA1217	RP11-507K13.4
AC084859.7	AC012157.21	ABCC8	NA	KNDC1	RP11-56M3.1
AC087521.10	AC026120.33	ABCG4	NA	LBX1	RP13-439H18.7
AC099842.2	AC055715.13	AC020549.4	NA	LGI1	RPL7AP8
AC116021.5	AC055716.24	AC023085.7	NA	LHPP	RPS15AP5
AC124798.5	AC063943.23	AC027804.7	NA	LRRC21	RPS27P1
AC132217.15	AC069240.23	AC044839.16	NA	LRRC22	SFMBT2
ADAMTS15	AC073610.17	AC051649.21	NA	LRRTM3	SFRP5
ADAMTS8	AC079315.30	AC068205.25	NA	MKI67	SFTPD
ADM	AC089987.26	AC084859.7	NA	MKX	SH3PXD2A
AHNAK	AC089999.20	AC087380.14	NA	MMP21	SLC16A12
ALX4	AC090671.5	AC090099.14	NA	MMS19	SLC16A9
AMOTL1	AC121758.14	AC103710.2	NA	MXI1	SLC18A3
AMPD3	AC127894.6	AC113331.6	NA	MYO3A	SLIT1
AP000593.4	AC131157.4	AC116533.11	NA	NEBL	SORCS1
AP000679.7	AC131212.6	AC127526.11	NA	NEURL	SORCS3
AP000721.5	AC135895.2	AC127526.2	NA	NEUROG3	SPAG6
AP000769.5	AC137834.9	AC129505.8	NA	NKX1-2	SPOCK2
AP000859.4	AC140847.4	AC129929.5	NA	NKX6-2	SVIL
AP000867.5	AC148477.3	AC132216.7	NA	NMT2	SYT15
AP000879.4	ACSM4	AC132217.15	NA	NODAL	TACC2
AP000889.6	ACVR1B	AC138230.5	NA	NPFFR1	TCERG1L
AP000926.6	ADAMTS20	AC139143.1	NA	NPM3	TCF7L2
AP001362.5	ALX1	ACY3	NA	NRBF2	TET1
AP001453.6	ANKS1B	ADAMTS8	NA	NRG3	TLL2
AP001782.4	AQP6	AL049635.8	NA	NRP1	TLX1
AP001924.5	ARHGAP9	ALDH3B2	NA	OGDHL	TMEM10
AP002008.5	ASCL1	ALKBH3	NA	PAPSS2	TMEM26
AP002380.3	ASCL4	ALX4	NA	PARD3	TSPAN15
AP002448.3	AVPR1A	AMICA1	NA	PAX2	UBTD1
AP002893.3	B3GNT4	ANKK1	NA	PCDH21	UNC5B
AP002956.1	B4GALNT3	AP000438.5	NA	PDSS1	UTF1
AP003035.2	BCDIN3D	AP000479.5	NA	PHYHIPL	VAX1
AP003108.3	C12orf34	AP000679.7	NA	PITX3	VENTX
AP003419.3	C12orf42	AP000805.4	NA	PLAC9	VIM
AP003555.2	C12orf53	AP000807.4	NA	PLCE1	VWA2
AP003774.4	C12orf54	AP000859.4	NA	PLEKHA1	XX-2136C48.7
AP006284.2	C12orf68	AP000867.15	NA	PLEKHK1	ZEB1
AP006294.1	C1QL4	AP000867.5	NA	PNLIPRP1	ZMIZ1
AP006437.2	CABP1	AP000868.4	NA	PNLIPRP2	ZNF365
APBB1	CACNA2D4	AP000879.4	NA	PNLIPRP3	ZNF488
APLP2	CCDC63	AP000889.6	NA	PPAPDC1A	ZNF503
ARHGAP20	CCDC64	AP000911.5	NA	PPP1R3C	ABCC8
ARHGEF17	CCND2	AP001157.4	NA	PPYR1	ABCG4
ARNTL	CENTG1	AP001266.4	NA	PRAP1	ABTB2
ARRB1	COL2A1	AP001362.5	NA	PRKG1	AC009656.11
ASCL2	CUX2	AP001453.6	NA	PRLHR	AC013791.2
ATG16L2	CYP27B1	AP002348.3	NA	PSD	AC022878.8
ATHL1	DCTN2	AP002358.3	NA	PTCHD3	AC023085.7
B3GNT6	DNAJC22	AP002387.4	NA	PTF1A	AC026894.7
BAD	DYRK4	AP002448.3	NA	PTPRE	AC044810.7
BARX2	FAM138B	AP002806.3	NA	RASGEF1A	AC044839.16
BDNF	FGF23	AP002893.3	NA	RBP4	AC051649.21
BSX	FGF6	AP002954.1	NA	RET	AC068205.25
BTG4	FOXN4	AP002956.1	NA	RGR	AC068580.3
C11orf35	GALNT8	AP002959.2	NA	RHOBTB1	AC079296.5
C11orf45	GALNT9	AP002962.2	NA	RP11-106M7.4	AC084859.7
C11orf81	GLI1	AP002964.2	NA	RP11-122K13.8	AC090099.14
C11orf85	GLS2	AP003025.2	NA	RP11-14C22.4	AC090625.5
C11orf87	GPR133	AP003040.2	NA	RP11-215C7.3	AC113331.6
C11orf88	GRIN2B	AP003065.2	NA	RP11-242G20.2	AC116535.9
C11orf9	GRIP1	AP003087.2	NA	RP11-252O7.2	AC129929.5
C1QTNF4	HOXC12	AP003108.3	NA	RP11-272J7.5	AC132217.15
C1QTNF5	HOXC13	AP003110.2	NA	RP11-316M21.8	ACY3
C2CD2L	HVCN1	AP003171.2	NA	RP11-324H6.4	ADAMTS15
CADM1	IQSEC3	AP003393.1	NA	RP11-343J3.3	ADAMTS8
CALCA	KCNA1	AP003419.3	NA	RP11-343J3.4	ADM
CALCB	KCNA5	AP003462.2	NA	RP11-343J3.5	AL049635.8
CCDC67	KCNA6	AP003484.2	NA	RP11-343J3.6	AL135932.7
CCDC85B	KCNC2	AP003555.2	NA	RP11-343J3.7	ALX4
CCKBR	KCNH3	AP003721.3	NA	RP11-346D6.5	AMICA1
CCND1	KIAA1853	AP003774.4	NA	RP11-359B3.1	ANKK1
CD44	KIF5A	AP003778.3	NA	RP11-455B2.9	AP000593.4
CD82	KRT1	AP004243.2	NA	RP11-462L8.2	AP000640.5
CDC42EP2	KRT3	AP006285.2	NA	RP11-478K7.1	AP000679.7
CDKN1C	KRT4	AP006287.2	NA	RP11-479O17.7	AP000708.1
CHRDL2	KRT5	AP006288.1	NA	RP11-479O17.8	AP000758.5
CHRM1	KRT6A	AP006296.1	NA	RP11-47G11.1	AP000859.4
CHRM4	KRT6B	APLNR	NA	RP11-47G11.3	AP000867.5
CHST1	KRT71	ART1	NA	RP11-490O24.1	AP000872.5
CLCF1	KRT72	ART5	NA	RP11-498J9.1	AP000879.4
COX8A	KRT74	ASCL2	NA	RP11-500G10.4	AP000889.6
CPT1A	KRT75	ASRGL1	NA	RP11-507K13.4	AP000911.5
CRY2	KRT76	B3GAT1	NA	RP11-50E11.2	AP000926.6
CST6	KRT78	B3GNT6	NA	RP11-51B10.3	AP001453.6
DAGLA	LHX5	B4GALNT4	NA	RP11-543N17.2	AP001782.4
DBX1	LRTM2	BARX2	NA	RP11-631M21.6	AP001894.4
DCHS1	METAP2	BDNF	NA	RP11-781P14.3	AP001924.5
DDX25	MON2	BRSK2	NA	RP11-89K18.1	AP002008.5
DGAT2	MSI1	BSX	NA	RPL7AP8	AP002348.3
DGKZ	MYL2	C11orf21	NA	RPS15AP5	AP002448.3
DKK3	MYO1H	C11orf35	NA	SEC31B	AP002956.1
DRD2	NELL2	C11orf53	NA	SFMBT2	AP003035.2
DRD4	NOS1	C11orf66	NA	SFRP5	AP003040.2
DSCAML1	OR10P1	C11orf72	NA	SH3PXD2A	AP003065.2
DUSP8	OR6C3	C11orf85	NA	SLC16A12	AP003108.3
E2F8	P2RX2	C11orf9	NA	SLC18A3	AP003110.2
EHBP1L1	PAH	C1QTNF4	NA	SLIT1	AP003555.2
ENDOD1	PDE1B	CABP2	NA	SORCS1	AP006284.2
ESAM	PDZRN4	CALCA	NA	SORCS3	AP006285.2
ESRRA	PKP2	CALCB	NA	SPAG6	AP006289.2
ETS1	PLXNC1	CCDC153	NA	SPOCK2	AP006296.1
FAM181B	PPP1R1A	CCDC73	NA	SPRN	APBB1
FAM89B	PRMT8	CCDC86	NA	SVIL	APLNR
FGF3	PRPH	CCKBR	NA	SYCE1	ARHGAP20
FGF4	PTPRR	CD3D	NA	SYT15	ARHGEF12
FIBP	RDH16	CD3E	NA	TACC2	ARHGEF17
FJX1	RFX4	CD3G	NA	TBC1D12	ARNTL
FLI1	RND1	CD5	NA	TCERG1L	ART1
FLRT1	RPH3A	CD6	NA	TECTB	ART5
FOSL1	SDS	CHRDL2	NA	TET1	ASCL2
FUT4	SLC26A10	CHRM1	NA	TLL2	ATHL1
FZD4	SLC2A14	CHRM4	NA	TLX1	B3GAT1
GAB2	SLC5A8	CHST1	NA	TMEM180	B4GALNT4
GAL	SLC6A12	CNTN5	NA	TMEM26	BARX2
GALNTL4	SLC6A13	CSRP3	NA	TSPAN15	BDNF
GDPD5	SPIC	DBX1	NA	UBTD1	BRSK2
GLB1L2	STAB2	DCHS1	NA	UNC5B	BSX
GLB1L3	SVOP	DDX25	NA	UTF1	BTG4
GPR137	SYT10	DGAT2	NA	VAX1	C11orf35
GPR44	TAC3	DGKZ	NA	VENTX	C11orf45
GPR83	TAS2R7	DLG2	NA	VWA2	C11orf61
GRIA4	TAS2R8	DRD2	NA	WAC	C11orf63
GRM5	TBX5	DSCAML1	NA	WNT8B	C11orf70
GUCY1A2	TESC	DTX4	NA	XX-2136C48.7	C11orf87
HEPACAM	TMCC3	DUSP8	NA	XX-2136C48.8	C11orf88
HEPN1	TMEM16B	E2F8	NA	XX-2136C77.1	C1QTNF4
HRAS	TMEM16D	ESAM	NA	ZMYND11	C1QTNF5
HTATIP2	TRHDE	FAM99A	NA	ZNF365	CADM1
IGF2	TSPAN31	FGF19	NA	ZNF503	CALCA
IGF2AS	TSPAN9	FGF3	NA	ZNF518A	CALCB
IGSF9B	USP44	FGF4	NA	ABCC8	CBL
IL10RA	WIF1	FLI1	NA	ABCG4	CCDC15
INPPL1	WNT1	FOLR2	NA	ABTB2	CCDC67
INSC	WNT10B	FXYD2	NA	AC013549.9	CCKBR
KCNA4	AL137002.19	FXYD6	NA	AC016450.10	CCND1
KCNC1	AL137061.12	GAL	NA	AC021427.10	CD151
KCNJ5	AL137141.10	GAL3ST3	NA	AC023085.7	CD81
KCNK4	AL138691.15	GAS2	NA	AC026894.7	CDC42EP2
KCNK7	AL139326.15	GLB1L2	NA	AC027804.7	CDKN1C
KCNQ1	AL157364.15	GLB1L3	NA	AC044810.7	CDON
KLHL35	AL157819.15	GLYAT	NA	AC044839.16	CHRDL2
LAYN	AL159977.10	GPR137	NA	AC068205.25	CHRM1
LMO1	AL162574.14	GPR83	NA	AC068580.3	CHRM4
LMO2	AL356257.14	GRIA4	NA	AC079296.5	CHST1
LRP4	AL356915.19	GRIK4	NA	AC084859.7	CST6
LRRC32	AL359538.8	GRM5	NA	AC087521.10	CYB5R2
LRRC4C	AL390738.4	GSTP1	NA	AC090099.14	DAGLA
LRRC55	AL591024.14	GVIN1	NA	AC090625.5	DBX1
LRRC56	ARHGEF7	GYLTL1B	NA	AC099738.2	DCDC1
LTBP3	ATP12A	H19	NA	AC103710.2	DCHS1
LUZP2	ATP8A2	HNT	NA	AC113193.6	DDX25
MAP6	C13orf15	HRASLS5	NA	AC113331.6	DGAT2
MAPK8IP1	C13orf18	HTR3A	NA	AC122179.6	DGKZ
MCAM	CCNA1	HTR3B	NA	AC124276.5	DIXDC1
ME3	CDX2	IGF2	NA	AC124798.5	DKK3
MFRP	CLDN10	IGF2AS	NA	AC132217.15	DRD2
MICAL2	CYSLTR2	IGSF9B	NA	AC136475.7	DRD4
MPPED2	DACH1	IL10RA	NA	ADAMTS15	DSCAML1
MPZL2	F10	JAM3	NA	ADAMTS8	DTX4
MTA2	FAM123A	KCNA4	NA	ADM	DUSP8
MTNR1B	FAM70B	KCNC1	NA	AL049635.8	EFCAB4A
MUCDHL	FGF14	KCNJ11	NA	AL135932.7	EHF
MYOD1	FGF9	KCNK4	NA	ALKBH3	ESAM
NAV2	FLT1	KCNQ1	NA	ALX4	ESRRA
NCAM1	FLT3	KLHL35	NA	ANKK1	EXPH5
NELL1	FREM2	KRTAP5-1	NA	AP000435.5	FAM111B
NPAS4	GJB2	KRTAP5-10	NA	AP000479.5	FAM181B
NRGN	GJB6	KRTAP5-11	NA	AP000590.7	FBXO3
NRIP3	GPC5	KRTAP5-2	NA	AP000593.4	FEZ1
NRXN2	GPR12	KRTAP5-3	NA	AP000662.4	FGF19
OAF	GRK1	KRTAP5-5	NA	AP000708.1	FGF3
OPCML	GRTP1	KRTAP5-6	NA	AP000859.4	FGF4
OR4X2	GSH1	KRTAP5-7	NA	AP000867.5	FJX1
OTOG	HS6ST3	KRTAP5-9	NA	AP000872.5	FLI1
OVOL1	HTR2A	LMO1	NA	AP000879.4	FXYD2
P2RY2	KL	LMO2	NA	AP000889.6	FXYD6
P2RY6	LECT1	LRRC55	NA	AP000907.6	GALNTL4
P4HA3	MCF2L	LSP1	NA	AP000911.5	GAS2
PAX6	MLNR	MAP6	NA	AP000926.6	GDPD4
PDE2A	NBEA	MAPK8IP1	NA	AP000997.1	GLB1L2
PDE3B	PCDH17	MOGAT2	NA	AP001007.5	GLB1L3
PGR	PCDH20	MPZL2	NA	AP001267.4	GLYATL2
PHLDA2	PCDH8	MPZL3	NA	AP001453.6	GPR137
PHLDB1	PDX1	MRGPRD	NA	AP001924.5	GPR83
PHOX2A	POU4F1	MRGPRE	NA	AP001979.7	GRIA4
PKNOX2	PRHOXNB	MRGPRG	NA	AP002008.5	GRM5
PLEKHB1	RP11-124N19.2	MRGPRX1	NA	AP002348.3	GSTP1
PRDX5	RP11-154C3.3	MRGPRX2	NA	AP002370.5	GUCY1A2
PRR10	RP11-165I9.7	MRGPRX4	NA	AP002380.3	GYLTL1B
PTPN5	RP11-178C10.3	MS4A10	NA	AP002448.3	HNT
PUS3	RP11-206I15.2	MS4A15	NA	AP002784.4	HRASLS3
RAB3IL1	RP11-264J4.4	MS4A6E	NA	AP002956.1	IGF2
RASGRP2	RP11-31H2.2	MUC5AC	NA	AP002957.2	IGF2AS
RASSF7	RP11-359P14.2	MUC5B	NA	AP003035.2	IGSF9B
RELT	RP11-521H3.2	MYO7A	NA	AP003040.2	IL10RA
RNF26	RP11-56M2.1	MYOD1	NA	AP003065.2	INPPL1
ROBO3	RP11-72P19.2	NALP6	NA	AP003087.2	INSC
ROBO4	RP11-756A22.5	NCAM1	NA	AP003108.3	JAM3
RTN4RL2	RP11-94N9.1	NDUFV1	NA	AP003402.3	KCNA4
SCGB1A1	RP11-98F14.4	NELL1	NA	AP003555.2	KCNC1
SCN2B	SLAIN1	NLRX1	NA	AP004371.2	KCNJ5
SCN3B	SLC15A1	NRGN	NA	AP004609.1	KCNK4
SCN4B	SLITRK1	NRXN2	NA	AP006284.2	KCNQ1
SCT	SLITRK5	ODF3	NA	AP006285.2	KCTD14
SCUBE2	SOX1	OPCML	NA	AP006296.1	KIRREL3
SIAE	SOX21	OR10G7	NA	APLNR	KLHL35
SIGIRR	SPERT	OR10V1	NA	ARHGAP20	KRTAP5-1
SIPA1	TNFSF11	OR10W1	NA	ARHGEF12	KRTAP5-6
SLC17A6	ZIC2	OR2AT4	NA	ARNTL	KRTAP5-9
SLC1A2	ZIC5	OR4B1	NA	ASCL2	LAYN
SLC35C1	AB019438.63	OR4D11	NA	B3GAT1	LDHA
SLC37A2	AC005519.3	OR4D9	NA	B3GNT6	LMO1
SLC43A1	AC007375.6	OR51I1	NA	B4GALNT4	LRP4
SLC6A5	AE000660.1	OR51I2	NA	BARX2	LRRC32
SNF1LK2	AE000661.1	OR51Q1	NA	BDNF	LRRC4C
SNX19	AL049829.4	OR52E3P	NA	BRSK2	LRRC55
SPA17	AL049836.3	OR52J3	NA	BSX	LUZP2
SPON1	AL079303.3	OR52L2P	NA	BTG4	LYVE1
SSSCA1	AL117190.6	OR52M1	NA	C11orf35	MAP6
ST14	AL132640.4	OR52S1P	NA	C11orf40	MAPK8IP1
STIM1	AL132819.6	OR56A4	NA	C11orf46	MCAM
SYT12	AL132855.4	OR5B2	NA	C11orf52	MFRP
SYT13	AL133373.5	OR8A1	NA	C11orf61	MPPED2
SYT9	AL133445.4	OR8B4	NA	C11orf70	MPZL2
TBX10	AL135747.4	OTOG	NA	C11orf74	MRGPRF
TEAD1	AL136001.6	P2RX3	NA	C11orf81	MRGPRX1
TIGD3	AL137226.3	PAX6	NA	C11orf85	MRGPRX2
TMEM123	AL137786.3	PDE2A	NA	C11orf87	MTNR1B
TMEM151A	AL138995.5	PDE3B	NA	C11orf88	MYO7A
TMEM16A	AL157687.6	PDZD3	NA	C11orf9	MYOD1
TMEM45B	AL157997.5	PEX16	NA	C1QTNF5	NAALAD2
TPH1	AL161757.4	PGA3	NA	CADM1	NALP6
TRPC6	AL163636.7	PGA4	NA	CALCA	NAV2
TUB	AL355773.4	PGR	NA	CALCB	NCAM1
UBASH3B	AL357153.4	PHOX2A	NA	CCDC15	NELL1
USH1C	AL928742.10	PLEKHA7	NA	CCDC67	NLRP14
USP2	AL928742.9	POU2F3	NA	CCKBR	NOX4
VSIG2	AMN	PPFIA1	NA	CCND1	NPAS4
VWCE	BEGAIN	PRG2	NA	CD151	NRIP3
WIT1	BX927359.1	PRG3	NA	CDON	NRXN2
WNT11	C14orf115	PTH	NA	CEND1	OAF
WT1	C14orf166B	PTPN5	NA	CHRDL2	OPCML
YIF1A	C14orf180	PUS3	NA	CHRM1	OR10A6
ZBTB16	C14orf2	PVRL1	NA	CHRM4	OR10V1
AAAS	C14orf23	RAB39	NA	CHST1	OR51A7
ABCC9	C14orf39	RASGRP2	NA	CLCF1	OR52L1
AC005908.1	C14orf70	RASSF7	NA	CNIH2	OVOL1
AC007688.15	CHGA	RIC3	NA	CREB3L1	P4HA3
AC008013.8	CMTM5	ROBO3	NA	CRYAB	PACSIN3
AC009260.13	CPNE6	RTN4RL2	NA	CST6	PARVA
AC010177.48	DEGS2	SAA3P	NA	CTTN	PAX6
AC012531.11	DIO3	SAA4	NA	CYB5R2	PDE2A
AC016257.22	DLK1	SAPS3	NA	DAGLA	PDE3B
AC020629.6	EFS	SC5DL	NA	DBX1	PEX16
AC021066.37	EGLN3	SCGB1C1	NA	DCDC1	PGR
AC023055.40	EML5	SCGB1D1	NA	DCDC5	PHLDB1
AC023794.37	ESR2	SCGB1D4	NA	DCHS1	PHOX2A
AC025165.27	ESRRB	SCGB2A1	NA	DCUN1D5	PKNOX2
AC026765.22	FOXA1	SCN2B	NA	DDX25	PLEKHA7
AC048341.22	FOXG1	SCN3B	NA	DGAT2	POU2F3
AC055717.36	GSC	SCN4B	NA	DGKZ	PPFIBP2
AC069240.23	IGHV3-42	SF3B2	NA	DIXDC1	PRDX5
AC073610.17	IGHV3-75	SLC17A6	NA	DKK3	PRR10
AC089999.20	IGHV3-76	SLC1A2	NA	DLG2	PRSS23
AC090001.19	IGHV3-79	SLC22A11	NA	DRD2	PTPN5
AC092850.13	IGHV4-80	SLC22A12	NA	DRD4	PTPRJ
AC112777.7	IGHV7-81	SLC22A6	NA	DSCAML1	PUS3
AC117498.6	IGHVIII-76-1	SLC22A8	NA	DTX4	RAB39
AC117500.13	IL25	SLC22A9	NA	DUSP8	RAB6IP1
AC131212.6	JAG2	SLC6A5	NA	E2F8	RASGRP2
AC137766.2	JPH4	SLCO2B1	NA	EFCAB4A	RASSF7
AC137834.9	KCNH5	SORL1	NA	ELMOD1	RHOD
AC139768.14	KCNK10	SPON1	NA	EPS8L2	RIC3
ACCN2	LRFN5	SSRP1	NA	ESRRA	ROBO3
ACVR1B	LRRC16B	ST14	NA	FAM181B	RRAS2
ACVRL1	MAMDC1	STK33	NA	FBXO3	SAA4
ADAMTS20	MAP3K9	SUV420H1	NA	FEZ1	SBF2
ALDH1L2	MYH6	SYT13	NA	FGF19	SCGB1D2
ALX1	MYH7	SYT9	NA	FGF3	SCGB1D4
AMDHD1	NDRG2	TBC1D10C	NA	FGF4	SCGB2A2
AMIGO2	NGB	TBRG1	NA	FJX1	SCN3B
ANKRD13A	NKX2-8	TBX10	NA	FOXR1	SCN4B
ANKS1B	NOVA1	TMEM132A	NA	FXYD6	SCUBE2
APOLD1	NRL	TMEM16A	NA	FZD4	SHANK2
AQP2	OR5AU1	TMEM16C	NA	GAL	SLC15A3
AQP5	OR6S1	TMEM16J	NA	GALNTL4	SLC17A6
AQP6	OTX2	TMEM45B	NA	GAS2	SLC1A2
ARHGAP9	PAX9	TMPRSS13	NA	GLB1L2	SLC22A9
ASCL1	PELI2	TMPRSS4	NA	GLB1L3	SLC35F2
ASCL4	PRIMA1	TNNT3	NA	GPR137	SLC37A2
AVPR1A	RDH12	TRIM21	NA	GPR83	SLC6A5
B3GNT4	RNASE1	TRIM29	NA	GRIA4	SORL1
B4GALNT1	RNASE2	TSPAN32	NA	GRM5	SPON1
B4GALNT3	RNASE9	UPK2	NA	GUCY1A2	SPTBN2
BCL7A	RPGRIP1	USH1C	NA	GYLTL1B	ST14
BHLHB3	RTN1	VSIG2	NA	HNT	STK33
BTBD11	SALL2	WIT1	NA	HRASLS3	STX3
C12orf23	SIX6	WNT11	NA	HRASLS5	SYT12
C12orf39	SLC24A4	WT1	NA	HSPB2	SYT13
C12orf53	SNORD112	AC002351.2	NA	HTR3B	SYT9
C12orf56	SPTB	AC002978.1	NA	HYLS1	TEAD1
C12orf68	TCL1A	AC005343.1	NA	IFITM1	THY1
C1QL4	THSD3	AC005805.12	NA	IFITM3	TMEM132A
CACNA1C	TITF1	AC005908.1	NA	IFITM5	TMEM136
CACNB3	TMEM121	AC006511.5	NA	IGF2	TMEM151A
CCDC38	TMEM179	AC006517.46	NA	IGF2AS	TMEM16A
CCDC60	TMEM63C	AC007436.1	NA	IGSF9B	TMEM45B
CCDC92	TMEM90A	AC007623.33	NA	INPPL1	TMEM86A
CCND2	TRIM9	AC008013.8	NA	INSC	TMPRSS13
CDK4	TTC7B	AC008127.11	NA	KCNA4	TMPRSS4
CENTG1	TTC9	AC009260.13	NA	KCNC1	TOLLIP
CHPT1	VSX2	AC009729.14	NA	KCNJ5	TPH1
CHST11	AC004460.1	AC009803.17	NA	KCNK4	TRPC6
CLSTN3	AC009753.5	AC024940.39	NA	KCNQ1	TSPAN18
COL2A1	AC009852.9	AC025165.27	NA	KCTD14	TUB
CPM	AC011330.8	AC025265.21	NA	KIRREL3	UBASH3B
CPNE8	AC012476.8	AC026765.22	NA	KLHL35	USP2
CSAD	AC013356.8	AC055715.13	NA	KRTAP5-1	WIT1
CTDSP2	AC013489.17	AC055716.24	NA	KRTAP5-2	WNT11
CUX2	AC015720.20	AC055717.36	NA	LAYN	WT1
CYP27B1	AC015914.8	AC068988.20	NA	LDLRAD3	YAP1
DBX2	AC016525.11	AC069240.23	NA	LMO1	YIF1A
DDN	AC019278.6	AC073610.17	NA	LRP4	ZBTB16
DGKA	AC019294.7	AC078819.24	NA	LRP5	ZC3H12C
DHH	AC021755.9	AC079315.30	NA	LRRC4C	ZCSL3
DNAJC22	AC023300.19	AC079602.15	NA	LRRC55	ZNF214
DPY19L2	AC026583.10	AC083805.17	NA	LRRN4CL	ABCC9
DTX1	AC055874.8	AC087893.15	NA	LUZP2	AC005846.1
DUSP6	AC055876.1	AC089999.20	NA	MAP6	AC005908.1
EFCAB4B	AC066616.7	AC090525.8	NA	MAPK8IP1	AC005911.6
ELK3	AC068338.14	AC090671.5	NA	MCAM	AC006122.24
EPS8	AC068831.17	AC092746.9	NA	MFRP	AC007623.33
FAM113B	AC069082.9	AC121758.14	NA	MLL	AC008055.7
FAM119B	AC079075.6	AC122684.3	NA	MMP13	AC008114.25
FBXL14	AC087641.5	AC125816.8	NA	MMP27	AC008128.19
FKBP4	AC090510.4	AC131157.4	NA	MMP3	AC009260.13
FMNL3	AC090888.4	AC131212.6	NA	MRGPRF	AC009522.11
FOXN4	AC107977.13	AC148477.3	NA	MRGPRG	AC009729.14
FZD10	AC126323.6	ACCN2	NA	MRGPRX4	AC010177.48
GALNT9	AC133637.2	ACSM4	NA	MS4A6A	AC012531.11
GIT2	ACSBG1	ADAMTS20	NA	MTNR1B	AC016257.22
GLS2	ADAMTS17	ALX1	NA	MUC5AC	AC021066.37
GLT1D1	AP3B2	ANKS1B	NA	MUCDHL	AC025165.27
GPR84	APBA2	AQP5	NA	MYO7A	AC026765.22
GPRC5A	ARNT2	AQP6	NA	MYOD1	AC055715.13
GRASP	C15orf26	ARHGAP9	NA	NAALAD2	AC055716.24
GRIN2B	C15orf27	ASCL1	NA	NALP6	AC068798.26
HEBP1	C15orf60	ASCL4	NA	NAV2	AC068987.38
HIP1R	CHRNA3	AVPR1A	NA	NCAM1	AC068988.20
HOXC10	CHRNA7	B3GNT4	NA	NELL1	AC069240.23
HOXC11	CHRNB4	B4GALNT3	NA	NLRP10	AC073610.17
HOXC12	CLK3	BTBD11	NA	NOX4	AC073912.38
HOXC13	CPLX3	C12orf34	NA	NPAS4	AC078815.22
HOXC4	CRABP1	C12orf42	NA	NRIP3	AC078864.20
HOXC5	CTSH	C12orf53	NA	NRXN2	AC079033.12
HOXC6	CYP1A1	C12orf68	NA	ODZ4	AC079949.45
HOXC8	DAPK2	C1QL4	NA	OPCML	AC087893.15
HOXC9	DISP2	CABP1	NA	OR10A6	AC089987.26
HRK	DLL4	CACNA2D4	NA	OR10G6	AC089999.20
HVCN1	DUOX1	CCDC63	NA	OR10G8	AC090001.19
IGFBP6	DUOX2	CCDC64	NA	OR10G9	AC092746.9
IQSEC3	DUOXA1	CCND2	NA	OR51D1	AC112777.7
IRAK3	DUOXA2	CENTG1	NA	OR51E1	AC121758.14
ITGA5	EHD4	CLEC4D	NA	OR52E1P	AC131212.6
KCNA1	FAM174B	CLEC6A	NA	OR52I2	AC131238.3
KCNA5	FANCI	CMKLR1	NA	OR52L1	AC135895.2
KCNA6	FOXB1	COL2A1	NA	OR52S1P	AC137834.9
KCNH3	FSD2	CUX2	NA	OR56A1	AC139768.14
KIAA1853	GATM	CYP27B1	NA	OR5B17	AC140847.4
KIF21A	GJD2	DBX2	NA	OR5P3	AC148477.3
KITLG	HCN4	DCD	NA	OR6M1	ACCN2
KRT7	HDC	DHH	NA	OR8B12	ACSM4
KRT86	ISLR2	DNAJC22	NA	OR8B4	ACSS3
LAG3	LBXCOR1	DTX1	NA	OR8B8	ACVR1B
LGR5	LINGO1	DYRK4	NA	OTOG	ACVRL1
LHX5	LTK	FAIM2	NA	OVCH2	ADAMTS20
LMO3	MEGF11	FAM119B	NA	OVOL1	ALDH1L2
LRRC43	NTRK3	FAM138B	NA	P2RY6	ALX1
LRRK2	OCA2	FGF23	NA	P4HA3	ANKS1B
LRTM2	ONECUT1	FGF6	NA	PACSIN3	AQP2
LTBR	PCSK6	FMNL3	NA	PARVA	AQP5
2011-03-09	PLA2G4D	FOXN4	NA	PAX6	AQP6
METTL1	PLA2G4E	GALNT6	NA	PDE2A	ASCL1
MLXIP	PPP1R14D	GALNT8	NA	PDE3B	ASCL4
MMP17	PUNC	GALNT9	NA	PEX16	ATP5G2
MSRB3	RASGRF1	GLI1	NA	PGR	AVPR1A
MYF6	RASGRP1	GLT1D1	NA	PHF21A	B3GNT4
NDUFA4L2	RGMA	GPR162	NA	PHLDA2	B4GALNT1
NOS1	RHCG	GRASP	NA	PHLDB1	B4GALNT3
NR4A1	RORA	GRIN2B	NA	PHOX2A	BHLHB3
NT5DC3	RYR3	GRIP1	NA	PITPNM1	BTBD11
NTN4	SCAMP5	H1FNT	NA	PKNOX2	C12orf28
NUDT4	SPINT1	HOXC12	NA	PLEKHA7	C12orf34
NXPH4	ST8SIA2	HOXC13	NA	POU2F3	C12orf39
OAS3	SV2B	HVCN1	NA	PPFIA1	C12orf42
OR10AD1	TBC1D21	IL31	NA	PPFIBP2	C12orf5
P2RX2	TGM5	IQSEC3	NA	PRDX5	C12orf53
PDE1B	TGM7	KCNA1	NA	PRKCDBP	C12orf54
PDZRN4	ABAT	KCNA5	NA	PRR10	C12orf56
PLEKHG6	AC009019.10	KCNA6	NA	PRSS23	C12orf68
PLXNC1	AC009041.10	KCNC2	NA	PTH	C1QL4
POLE	AC009078.6	KCNH3	NA	PTPN5	CABP1
PPFIA2	AC009107.11	KIAA1853	NA	PUS3	CACNA1C
PPP1R1A	AC009113.8	KRT1	NA	PVRL1	CCDC60
PRICKLE1	AC009117.8	KRT2	NA	RAB30	CCDC63
PRMT8	AC009121.8	KRT3	NA	RAB39	CCDC64
PRPH	AC009133.7	KRT4	NA	RAB3IL1	CD9
PTHLH	AC010551.3	KRT5	NA	RASSF7	CKAP4
PTPRB	AC010650.9	KRT6B	NA	RBMXL2	CLEC4E
PTPRO	AC012183.9	KRT6C	NA	RCOR2	CMKLR1
PTPRR	AC012325.9	KRT71	NA	RHOD	COL2A1
PXMP2	AC023830.9	KRT72	NA	RIC3	CPM
RAD9B	AC026461.11	KRT73	NA	RNF26	CSRP2
RASAL1	AC027281.10	KRT74	NA	ROBO3	CTDSP2
RBP5	AC040169.7	KRT75	NA	RRAS2	CUX2
RFX4	AC092142.5	KRT76	NA	RTN4RL2	CYP27B1
RILPL2	AC092327.4	KRT77	NA	SAA3P	DBX2
RPH3A	AC092384.5	KRT78	NA	SAA4	DCD
SETD8	AC092725.3	KRT79	NA	SCGB1D1	DDN
SHMT2	AC093520.4	KRT82	NA	SCGB1D2	DHH
SLC24A6	AC099314.3	KRT84	NA	SCGB1D4	DNAJC22
SLC26A10	AC106785.3	KRT85	NA	SCGB2A2	DTX1
SLC2A13	AC108134.3	KSR2	NA	SCN3B	DTX3
SLC38A4	AC116348.3	LACRT	NA	SCN4B	DUSP6
SLC5A8	AC120114.2	LALBA	NA	SCT	EMP1
SLC6A12	AC120498.2	LHX5	NA	SCUBE2	EPS8
SMARCD1	AC130454.2	LRRIQ1	NA	SHANK2	FAIM2
SMUG1	AC134312.3	LRTM2	NA	SLC15A3	FAM101A
SOAT2	ACSF3	METTL1	NA	SLC17A6	FGF23
SOCS2	AJ003147.1	MIP	NA	SLC1A2	FGF6
SP7	AL031705.1	MSI1	NA	SLC22A10	FOXN4
SSPN	ANKS4B	MUC8	NA	SLC22A9	FZD10
ST8SIA1	AQP8	MUCL1	NA	SLC25A22	GALNT8
STX2	ASPHD1	MYO1H	NA	SLC37A2	GALNT9
SUDS3	ATP2C2	NANOG	NA	SLC6A5	GLI1
SYT10	BAIAP3	NELL2	NA	SLN	GLS2
TAOK3	C16orf54	NEUROD4	NA	SPATA19	GLT1D1
TBC1D30	C16orf68	NOS1	NA	SPON1	GLT8D2
TBX3	C16orf73	NR1H4	NA	SPTBN2	GPR133
TBX5	C16orf89	NRIP2	NA	ST14	GPR162
TCHP	CA5A	NXPH4	NA	SYT12	GPRC5A
TEAD4	CA7	OASL	NA	SYT13	GRASP
TENC1	CALB2	OR10A7	NA	SYT9	GRIN2B
TESC	CASKIN1	OR10P1	NA	TEAD1	GSG1
TMCC3	CBFA2T3	P2RX2	NA	TH	HOXC10
TMEM106C	CBLN1	PAH	NA	THY1	HOXC11
TMEM117	CCDC113	PDE1B	NA	TMEM126A	HOXC12
TMEM132D	CCDC64B	PDZRN4	NA	TMEM132A	HOXC13
TRHDE	CCL22	PKP2	NA	TMEM151A	HOXC4
TSPAN11	CDH1	PLXNC1	NA	TMEM16A	HOXC5
TSPAN31	CDH3	PPP1R1A	NA	TMEM16C	HOXC6
TSPAN8	CDH8	PRMT8	NA	TMEM218	HOXC8
TSPAN9	CES1	PRPH	NA	TMEM45B	HOXC9
VDR	CHST5	PTHLH	NA	TPH1	HRK
VPS29	CHST6	PTPRR	NA	TRPC6	HVCN1
VPS37B	CLDN9	PZP	NA	TSKU	IFNG
WIBG	CSNK2A2	RASAL1	NA	TSPAN18	INHBE
WIF1	CX3CL1	RDH16	NA	TUB	ITGA7
WNT1	DPEP1	RFX4	NA	USH1C	KCNA1
WNT10B	ERAF	RND1	NA	USP2	KCNA5
WNT5B	ERN2	SLC17A8	NA	WEE1	KCNA6
YAF2	FA2H	SLC26A10	NA	WIT1	KCNC2
ZNF664	FAM18A	SLC2A14	NA	WNT11	KCNH3
ZNF740	FAM57B	SLC4A8	NA	WT1	KCNJ8
ABCC4	FBXL16	SLC5A8	NA	YAP1	KCNMB4
AL137061.12	FOXF1	SLC6A12	NA	YIF1A	KIAA1853
AL138691.15	GBL	SLC6A13	NA	YPEL4	KITLG
AL157819.15	GINS2	SLC6A15	NA	ZCSL3	KLRC4
AL359085.14	GNAO1	SPIC	NA	ABCC9	KLRK1
AL359513.12	GPR114	STAB2	NA	AC005343.1	KRT18
AL390738.4	GPR139	SVOP	NA	AC005908.1	KRT3
AL590064.9	GPR97	SYT10	NA	AC005911.6	KRT4
AL591024.14	GPT2	TAC3	NA	AC007535.3	KRT6A
ARHGEF7	GSG1L	TAS2R7	NA	AC007537.3	KRT7
ATP12A	HS3ST4	TBC1D30	NA	AC007623.33	KRT72
ATP8A2	HS3ST6	TBX5	NA	AC008114.25	KRT74
BIVM	IL27	TESC	NA	AC009260.13	KRT76
C13orf15	IRF8	TIMELESS	NA	AC010177.48	KRT77
C13orf18	IRX6	TMCC3	NA	AC012157.21	KRT78
C13orf26	ITGAD	TMEM16B	NA	AC012531.11	KRT82
C13orf31	JPH3	TRHDE	NA	AC021066.37	KRT84
C13orf36	KCNG4	TRPV4	NA	AC025165.27	KRT85
CCDC122	KREMEN2	TSPAN11	NA	AC026765.22	KRT86
CCNA1	LA16c-358B7.2	TSPAN31	NA	AC055716.24	LACRT
CDX2	LMF1	TSPAN9	NA	AC055717.36	LAG3
COL4A1	MARVELD3	U47924.1	NA	AC068775.52	LALBA
COL4A2	MMP25	WIF1	NA	AC068798.26	LGR5
CRYL1	MT1G	WNT1	NA	AC068799.14	LHX5
DACH1	MT1H	WNT10B	NA	AC068988.20	LIN7A
DCAMKL1	MT1X	AL137061.12	NA	AC069235.23	LMO3
DLEU7	MT3	AL137139.9	NA	AC069240.23	LRIG3
DOCK9	MT4	AL138691.15	NA	AC073610.17	LRRC43
EDNRB	NDRG4	AL139085.13	NA	AC078815.22	LRRIQ1
EFNB2	NKD1	AL139320.18	NA	AC079033.12	LRRK2
ENOX1	OR1F1	AL139326.15	NA	AC079460.19	LRTM2
EPSTI1	OR2C1	AL139801.17	NA	AC079949.45	METTL1
F7	OTOA	AL157364.15	NA	AC090001.19	MGP
FAM123A	PKD1L2	AL157819.15	NA	AC090671.5	MMP17
FAM155A	PLCG2	AL158192.15	NA	AC092746.9	MSI1
FAM70B	PLLP	AL159977.10	NA	AC112777.7	MYF5
FARP1	PRKCB1	AL160157.17	NA	AC122684.3	MYF6
FGF14	PRSS21	AL160397.17	NA	AC125807.9	NDUFA4L2
FGF9	PRSS33	AL162377.10	NA	AC125816.8	NELL2
FLT1	PYDC1	AL162853.17	NA	AC131212.6	NEUROD4
FLT3	RBL2	AL163533.14	NA	AC137834.9	NINJ2
FREM2	RGS11	AL354833.9	NA	AC140847.4	NOS1
GAS6	RLTPR	AL356502.21	NA	AC148477.3	NTN4
GJA3	SBK1	AL356915.19	NA	ACCN2	NUAK1
GJB2	SCNN1B	AL390738.4	NA	ACSS3	NXPH4
GJB6	SCNN1G	AL591024.14	NA	ACVR1B	OAS2
GPC5	SEC14L5	AL731858.10	NA	ACVRL1	OAS3
GPR12	SEZ6L2	ARHGEF7	NA	ADAMTS20	OR6C2
GPR180	SLC6A2	ATP12A	NA	AKAP3	P2RX2
GSH1	SMPD3	ATP4B	NA	ALX1	PAWR
HS6ST3	SOX8	ATP8A2	NA	ANKS1B	PDE1B
IL17D	SSTR5	C13orf35	NA	AQP2	PDZRN4
KCTD12	STX1B2	C13orf36	NA	AQP5	PHLDA1
KDELC1	SULT1A2	CCNA1	NA	ASCL1	PIWIL1
KL	SYNGR3	CDX2	NA	ASCL4	PKP2
KLF5	SYT7	CLDN10	NA	AVPR1A	PLEKHG7
KLHL1	TEKT5	CYSLTR2	NA	B3GNT4	PPFIA2
LCP1	TFAP4	DACH1	NA	B4GALNT1	PPP1R1A
LMO7	TMC5	F10	NA	B4GALNT3	PRICKLE1
LRCH1	TNP2	F7	NA	BCDIN3D	PRMT8
LRRC63	TRIM72	FAM123A	NA	BHLHB3	PRPH
MAB21L1	WDR24	FAM124A	NA	C12orf34	PTHLH
MBNL2	Z98883.5	FGF14	NA	C12orf39	PTPRB
MCF2L	ZNF19	FGF9	NA	C12orf42	PTPRO
MLNR	ZP2	FLT1	NA	C12orf53	PTPRR
MYO16	AATF	FLT3	NA	C12orf55	PXN
N4BP2L1	ABI3	FREM2	NA	C12orf56	RASSF8
NEK3	AC003043.1	GJA3	NA	C12orf68	RBMS2
OXGR1	AC004706.4	GJB2	NA	C1QL4	RERG
PCDH17	AC004797.1	GJB6	NA	CABP1	RFX4
PCDH20	AC005277.1	GPC5	NA	CACNA1C	RND1
PCDH8	AC005332.1	GPR12	NA	CCDC60	RPH3A
PDX1	AC005691.1	GRK1	NA	CCDC64	SLC26A10
POU4F1	AC005696.1	GRTP1	NA	CD163L1	SLC38A4
PRHOXNB	AC005837.1	GSH1	NA	CD9	SLC41A2
PROZ	AC005962.1	HS6ST3	NA	CLEC4A	SLC5A8
RAB20	AC006050.3	IRG1	NA	COL2A1	SLC6A15
RASA3	AC007431.1	KL	NA	CPM	SMUG1
RASL11A	AC007461.8	LCP1	NA	CSRP2	SOX5
RP11-203I16.3	AC008158.16	LECT1	NA	CUX2	SRGAP1
RP11-206I15.2	AC009720.19	MCF2L	NA	CYP27B1	SSH1
RP11-218A18.1	AC015674.12	MLNR	NA	DBX2	SSPN
RP11-24H2.1	AC015804.14	NDFIP2	NA	DCN	ST8SIA1
RP11-346L13.3	AC015818.2	OXGR1	NA	DDN	SYT1
RP11-385E5.2	AC015845.8	PABPC3	NA	DHH	SYT10
RP11-385E5.8	AC015917.30	PCDH17	NA	DNAJC22	TBC1D30
RP11-534K14.1	AC021534.1	PCDH20	NA	DTX1	TBX3
RP11-534K14.2	AC021593.15	PCDH8	NA	E2F7	TBX5
RP11-569O4.6	AC025521.20	PDX1	NA	EPS8	TEAD4
SERP2	AC025627.13	POU4F1	NA	ERBB3	TMCC3
SLC15A1	AC026954.6	PRHOXNB	NA	FAIM2	TMEM132D
SLC46A3	AC032044.28	RNF17	NA	FAM101A	TMEM16B
SLITRK1	AC053481.13	RP11-149B7.1	NA	FAM119B	TMTC1
SLITRK5	AC055863.16	RP11-154C3.3	NA	FGD6	TMTC2
SOX1	AC061975.6	RP11-169O17.1	NA	FGF23	TNFRSF1A
SOX21	AC068531.9	RP11-16L6.2	NA	FOXN4	TRHDE
STARD13	AC079199.2	RP11-173P16.2	NA	FZD10	TRPV4
TGDS	AC087164.9	RP11-178C10.3	NA	GALNT8	TSPAN11
THSD1	AC087645.19	RP11-189B4.4	NA	GALNT9	TSPAN8
TMEM46	AC087749.12	RP11-206I15.2	NA	GLI1	TSPAN9
TMTC4	AC090286.16	RP11-24H2.1	NA	GLS2	U47924.1
TNFRSF19	AC090610.6	RP11-264J4.4	NA	GLT1D1	USP30
VGCNL1	AC091178.7	RP11-31H2.2	NA	GLT8D2	UTP20
ZIC2	AC097370.10	RP11-351K3.4	NA	GPR133	VDR
AC007160.3	AC100793.8	RP11-359P14.2	NA	GPRC5A	WIF1
AC007375.6	AC103702.3	RP11-363G2.1	NA	GRASP	WNT1
ACOT6	AC104996.4	RP11-421P11.6	NA	GRIN2B	WNT10B
ADCY4	AC108004.3	RP11-457D13.1	NA	HOXC10	WNT5B
AHNAK2	AC109319.17	RP11-534K14.1	NA	HOXC11	WSCD2
AKT1	AC113554.9	RP11-545M8.1	NA	HOXC12	AL137061.12
AL049775.2	AC115090.8	RP11-65L19.1	NA	HOXC13	AL138691.15
AL049836.3	AC129492.6	RP11-72P19.2	NA	HOXC4	AL139326.15
AL079303.3	AC129916.1	RP11-72P19.3	NA	HOXC5	AL157819.15
AL117190.6	AC138710.5	RP11-756A22.5	NA	HOXC6	AL158192.15
AL117692.5	ACCN1	RP11-76N11.2	NA	HOXC8	AL159153.17
AL121819.6	ACE	RP11-87C7.2	NA	HOXC9	AL353660.11
AL132640.4	ADAM11	RP11-98F14.4	NA	HRK	AL354809.12
AL133368.6	AL353997.1	SLAIN1	NA	HSPB8	AL359513.12
AL133373.5	ALOX15	SLC15A1	NA	HVCN1	AL390738.4
AL136001.6	ALOXE3	SLITRK1	NA	INHBE	AL445985.10
AL161757.4	AOC3	SLITRK5	NA	ITGA7	ALOX5AP
AL590327.3	ARHGEF15	SOX1	NA	KCNA1	ARHGEF7
AL928654.1	ARL5C	SOX21	NA	KCNA5	ATP12A
AMN	ASGR2	TMEM46	NA	KCNC2	ATP8A2
BCL11B	ATP1B2	TNFSF11	NA	KCNH3	C13orf18
BCL2L2	ATP2A3	ZIC2	NA	KCNJ8	C13orf26
BDKRB2	BTBD17	ZIC5	NA	KCNMB4	C13orf33
BEGAIN	C17orf28	AB019437.1	NA	KIAA1853	C13orf36
BMP4	C17orf50	AB019440.1	NA	KIF21A	C13orf39
C14orf118	C17orf76	AB019441.1	NA	KITLG	CCNA1
C14orf172	C17orf77	AC005477.1	NA	KLRC1	CDX2
C14orf179	C17orf85	AC007375.6	NA	KLRC2	CLDN10
C14orf23	C17orf92	AE000659.1	NA	KLRC3	COL4A1
C14orf29	C1QL1	AE000660.1	NA	KLRC4	COL4A2
C14orf37	CA10	AE000661.1	NA	KLRK1	DCAMKL1
C14orf39	CA4	AE000662.1	NA	KRT3	DGKH
C14orf4	CACNG1	AF111169.2	NA	KRT6A	DHRS12
C14orf43	CACNG4	AL049829.14	NA	KRT7	DZIP1
C14orf50	CACNG5	AL049829.4	NA	KRT72	EDNRB
C14orf65	CARD14	AL049836.3	NA	KRT74	EFNB2
C14orf73	CBX2	AL079303.3	NA	KRT75	ENOX1
C14orf80	CBX4	AL079307.7	NA	KRT76	F7
C14orf83	CBX8	AL121784.5	NA	KRT85	FAM123A
CKB	CCL1	AL122127.6	NA	KRT86	FAM124A
CLEC14A	CCL14	AL132819.6	NA	LGR5	FAM155A
COCH	CCL15	AL132855.4	NA	LHX5	FAM70B
CRIP1	CCL23	AL133240.4	NA	LIN7A	FARP1
CRIP2	CD300A	AL133368.6	NA	LMO3	FGF14
DACT1	CD300E	AL133373.5	NA	LRIG3	FGF9
DEGS2	CD300LF	AL133445.4	NA	LRP1	FLT1
DIO3	CENTA2	AL135747.4	NA	LRRIQ1	FLT3
DLK1	CENTB1	AL136001.6	NA	LRTM2	FOXO1A
DPF3	CRHR1	AL138976.5	NA	MED13L	FREM2
EML5	CSH1	AL157687.6	NA	METTL1	FRY
ESR2	CSH2	AL157789.6	NA	MGP	GAS6
ESRRB	DLX3	AL157871.5	NA	MMP17	GJA3
EVL	DLX4	AL157997.5	NA	MSI1	GJB2
FBLN5	DNAH2	AL161757.4	NA	MYF5	GJB6
FLRT2	DNAI2	AL162511.5	NA	MYF6	GPC5
FLVCR2	DPH1	AL163195.5	NA	NDUFA4L2	GPC6
FOS	EFCAB3	AL163636.7	NA	NELL2	GPR12
FOXA1	EPN3	AL163952.5	NA	NEUROD4	GRTP1
FOXG1	EPX	AL355773.4	NA	NOS1	GSH1
GALNTL1	FADS6	AL357153.4	NA	NR1H4	HS6ST3
GCH1	FAM117A	AL928742.9	NA	NR4A1	IL17D
GPR135	FGF11	AMN	NA	NRIP2	ITGBL1
GSC	FOXJ1	ANGEL1	NA	NT5DC3	KCTD12
HHIPL1	GALR2	BCL11B	NA	NTN4	KL
HOMEZ	GARNL4	BEGAIN	NA	NUAK1	KLF12
INSM2	GAS2L2	C14orf115	NA	NXPH4	KLF5
JAG2	GAST	C14orf118	NA	OR6C6	KLHL1
JDP2	GH2	C14orf180	NA	OR6C65	LECT1
JPH4	GNGT2	C14orf23	NA	OR6C74	LMO7
KCNH5	GPR142	C14orf29	NA	OR6C75	MAB21L1
KCNK10	GPRC5C	C14orf39	NA	OR6C76	MCF2L
KCNK13	GRIN2C	C14orf70	NA	P2RX2	MLNR
KLHDC1	GSDM1	C14orf73	NA	PAH	NBEA
LGALS3	GUCY2D	C14orf83	NA	PDE3A	NDFIP2
LRFN5	HAP1	C14orf93	NA	PDZRN4	OXGR1
LTB4R	HLF	CCDC88C	NA	PGAM5	PCDH17
LTBP2	HNF1B	CDKN3	NA	PHLDA1	PCDH20
MAMDC1	HOXB13	CHGA	NA	PIWIL1	PCDH8
MARK3	HOXB8	CMA1	NA	PPFIA2	PDX1
MTA1	HOXB9	CMTM5	NA	PPP1R1A	POU4F1
NDRG2	ICAM2	COCH	NA	PRICKLE1	RAB20
NGB	IGF2BP1	CPNE6	NA	PRMT8	RP11-124N19.2
NID2	IKZF3	CYP46A1	NA	PRPF40B	RP11-153M24.1
NIN	ITGA2B	DEGS2	NA	PRPH	RP11-154C3.3
NKX2-8	ITGB4	DIO3	NA	PTHLH	RP11-165I9.7
NPAS3	JUP	DLK1	NA	PTPRB	RP11-187A9.2
NRL	KCNH6	EFS	NA	PTPRO	RP11-206I15.2
NRXN3	KCNJ12	EGLN3	NA	PTPRR	RP11-264J4.4
OTX2	KRT25	EML5	NA	RERG	RP11-271B5.1
PAPLN	KRT9	ESR2	NA	RFX4	RP11-278A16.1
PAX9	LHX1	ESRRB	NA	RIC8B	RP11-359P14.2
PGF	LPO	FAM181A	NA	RND1	RP11-421P11.7
PIGH	MED31	FOXA1	NA	RPH3A	RP11-505F3.2
PLEK2	MPO	FOXG1	NA	SETD8	RP11-534K14.1
POLE2	MPP2	GPHB5	NA	SHMT2	RP11-534K14.2
PPP1R13B	MSI2	GPR132	NA	SLC26A10	RP11-545M8.1
PPP1R3E	MYO15B	GSC	NA	SLC2A13	RP11-569O4.6
PPP2R5C	NACA2	GZMB	NA	SLC2A14	RP11-98F14.4
PRIMA1	NEUROD2	HSPA2	NA	SLC38A4	SLC15A1
PRKCH	NGFR	IGHJ1P	NA	SLC5A8	SLITRK1
PSMC1	NOL11	IGHJ2P	NA	SLC6A12	SLITRK5
PTGDR	NOS2A	IGHJ3P	NA	SLC6A13	SMAD9
PTGER2	NOTUM	IGHV3-6	NA	SLC6A15	SOX1
REM2	NPLOC4	IGHVII-1-1	NA	SMUG1	SOX21
RIN3	NPTX1	IGHVIII-11-1	NA	SNRPF	STARD13
RIPK3	NTN1	IL25	NA	SOX5	THSD1
RTN1	ODF4	INSM2	NA	SPIC	TMEM46
SAMD4A	OR4D1	JAG2	NA	SSH1	TNFSF11
SGPP1	OR4D2	JPH4	NA	ST8SIA1	TRPC4
SIX1	OTOP2	KCNH5	NA	STAB2	UBL3
SIX6	OTOP3	KCNK10	NA	SYT1	VGCNL1
SLC24A4	P2RX1	KCNK13	NA	SYT10	WASF3
SLC8A3	P2RX5	LRFN5	NA	TBC1D30	ZIC2
SMOC1	PIPOX	LRRC16B	NA	TBX3	ZIC5
SSTR1	PLXDC1	LRRC9	NA	TBX5	AB019438.1
STXBP6	PNMT	MAP3K9	NA	TEAD4	AB019439.1
TGFB3	PPM1E	MYH6	NA	TESC	AB019440.1
THSD3	PPP1R1B	MYH7	NA	TMCC3	AC004846.2
TITF1	PYY2	NDRG2	NA	TMEM117	AC007375.6
TMEM121	RAB11FIP4	NGB	NA	TMEM132B	ADCY4
TMEM179	RAB37	NGDN	NA	TMEM132D	AE000660.1
TMEM30B	RAMP2	NKX2-8	NA	TMEM16B	AE000661.1
TNFAIP2	RHBDL3	NOVA1	NA	TMEM16D	AE000662.1
TRAF3	RNF126P1	NRL	NA	TMTC1	AL049775.2
TRIM9	RUNDC3A	OR11H4	NA	TPH2	AL049829.14
TSHR	SCRN2	OR5AU1	NA	TRHDE	AL049831.2
VASH1	SDK2	OR6S1	NA	TRPV4	AL049836.3
VSX2	SEZ6	OTX2	NA	TSPAN11	AL079303.3
WDR21A	SKAP1	PAPLN	NA	TSPAN8	AL117190.6
WDR22	SLC13A2	PAX9	NA	TSPAN9	AL122127.6
AC009292.11	SLC13A5	PPP1R13B	NA	USP44	AL133240.4
AC010724.6	SLC16A6	PRIMA1	NA	UTP20	AL133368.6
AC011295.3	SLC4A1	RDH12	NA	VDR	AL133373.5
AC011330.6	SLC5A10	RNASE1	NA	VEZT	AL133445.4
AC013489.17	SLC6A4	RNASE11	NA	WIF1	AL136001.6
AC015723.8	SMTNL2	RNASE12	NA	WNT1	AL161668.6
AC022692.11	SOST	RNASE13	NA	WNT10B	AL161757.4
AC022710.10	SP6	RNASE2	NA	WNT5B	AL163011.3
AC023300.19	SSTR2	RNASE3	NA	WSB2	AL352979.4
AC025580.8	STARD3	RPGRIP1	NA	WSCD2	AL390816.4
AC027228.16	TBC1D29	RTN1	NA	ZBTB39	AL583722.6
AC044860.11	TBX21	SALL2	NA	ZNF705A	AL590326.3
AC048382.4	TIAF1	SERPINA11	NA	AC001226.1	AMN
AC048382.7	TM4SF5	SERPINA12	NA	AC001226.2	BCL11B
AC055876.1	TMC6	SIX6	NA	AL136359.13	BDKRB2
AC066611.6	TMC8	SLC10A1	NA	AL137061.12	BEGAIN
AC068213.7	TMEM102	SLC24A4	NA	AL137139.9	BMP4
AC068338.14	TMEM132E	SLC25A29	NA	AL138691.15	BX927359.1
AC087386.7	TNK1	SLC8A3	NA	AL138815.6	C14orf118
AC091544.11	TSPAN10	TC2N	NA	AL139034.20	C14orf174
AC092868.2	TUSC5	TCL6	NA	AL157364.15	C14orf23
AC103965.5	USH1G	TDRD9	NA	AL157819.15	C14orf29
AC105129.4	USP43	TITF1	NA	AL158192.15	C14orf37
AC107977.13	USP6	TMEM121	NA	AL159153.17	C14orf39
AC126335.16	UTS2R	TMEM179	NA	AL161773.21	C14orf50
AC126339.6	WNT3	TMEM63C	NA	AL354947.8	C14orf65
AC133637.2	WNT9B	TMEM90A	NA	AL359513.12	C14orf73
AC135731.6	WSCD1	TPPP2	NA	AL359925.9	C14orf83
AC135995.7	YBX2	TRIM9	NA	AL390738.4	CEBPE
AC136698.6	ZACN	TTC6	NA	AL391122.9	CHGA
AC138649.1	ZNF232	VASH1	NA	AL391382.10	CHURC1
AC138649.2	ZNF385C	VSX2	NA	AL445985.10	CLEC14A
AC139425.3	ZPBP2	AC004460.1	NA	AL731858.10	CLMN
ACAN	AC051635.7	AC009292.11	NA	ARHGEF7	COCH
ACTC1	AC090206.7	AC010674.11	NA	ATP11A	CRIP2
ADAMTS17	AC090340.6	AC011330.8	NA	ATP12A	CYP46A1
ADAMTSL3	AC090465.15	AC012476.8	NA	ATP7B	DACT1
ALDH1A2	AC091043.12	AC013356.8	NA	ATP8A2	DEGS2
ALDH1A3	AC104961.7	AC013489.17	NA	C13orf15	DIO3
ANKDD1A	AC105101.8	AC015720.20	NA	C13orf18	DLK1
ANP32A	AC118757.12	AC015871.7	NA	C13orf26	DPF3
ANPEP	ADCYAP1	AC015914.8	NA	C13orf33	EFS
ATP10A	AP002414.3	AC019278.6	NA	C13orf36	EGLN3
AVEN	AP005433.3	AC020659.5	NA	CCNA1	EML1
B2M	APCDD1	AC024474.8	NA	CDC16	EML5
BCL2L10	ASXL3	AC025580.8	NA	CDX2	ESRRB
BNC1	BRUNOL4	AC032011.15	NA	COL4A1	EVL
BRUNOL6	C18orf1	AC044913.7	NA	COL4A2	FBLN5
C15orf48	CBLN2	AC055876.1	NA	CSNK1A1L	FLRT2
C15orf56	CDH7	AC068338.14	NA	DCAMKL1	FOXA1
C15orf59	CIDEA	AC068831.17	NA	DGKH	FOXG1
CA12	CLUL1	AC069082.9	NA	DOCK9	GALNTL1
CATSPER2	CNDP1	AC087456.3	NA	DZIP1	GCH1
CHRFAM7A	COLEC12	AC087638.7	NA	EDNRB	GSC
CHRNA3	DLGAP1	AC087641.5	NA	EFHA1	HHIPL1
CORO2B	DSC2	AC090181.9	NA	EFNB2	HSPA2
CPEB1	DSC3	AC090888.4	NA	ESRAPP	IGHJ1P
CPLX3	DSG1	AC091582.17	NA	F10	IGHJ2P
CRABP1	EPB41L3	AC092079.2	NA	F7	IGHJ3P
CRTC3	GATA6	AC092754.4	NA	FAM123A	IGHM
CSK	GNAL	AC100834.3	NA	FAM124A	IGHV1-68
CSPG4	GRP	AC104758.12	NA	FAM155A	IGHV1-69
CTSH	KCNG2	AC107977.13	NA	FAM70B	IGHV3-30-2
CYFIP1	KLHL14	AC126323.6	NA	FARP1	IGHV3-50
CYP11A1	L3MBTL4	AC133637.2	NA	FBXL3	IGHV3-57
CYP19A1	LIPG	AC136704.9	NA	FGF14	IGHVII-30-1
CYP1A1	LOXHD1	AC140725.3	NA	FGF9	IGHVIII-67-4
DAPK2	LRRC30	ACSBG1	NA	FLT1	INSM2
DLL4	MAPK4	ADAMTS17	NA	FREM2	JDP2
DMN	MBP	ADAMTSL3	NA	GAS6	JPH4
DUOX1	MEP1B	AP3B2	NA	GJA3	JUB
DUOX2	MYO5B	BAHD1	NA	GJB2	KCNH5
DUOXA1	NETO1	BCL2L10	NA	GJB6	KCNK10
DUOXA2	NOL4	C15orf26	NA	GPC6	KCNK13
FAM103A1	ONECUT2	C15orf27	NA	GPR12	KIAA1622
FAM108C1	RAX	C15orf32	NA	GRTP1	LGMN
FAM148A	RNF165	C15orf56	NA	GSH1	LRFN5
FAM148B	SALL3	C15orf60	NA	HS6ST3	LTBP2
FAM81A	SEC11L3	CCDC33	NA	IL17D	MAMDC1
FBN1	ST8SIA5	CGNL1	NA	ING1	MAP3K9
FBXL22	SYT4	CHRNA3	NA	IRS2	MBIP
FOXB1	TAF4B	CHRNA5	NA	ITGBL1	MEG3
GABRA5	TNFRSF11A	CHRNA7	NA	KIAA0564	NDRG2
GABRG3	TTR	CHRNB4	NA	KIAA0774	NGB
GATM	AC002398.1	CKMT1B	NA	KLHL1	NID2
GCHFR	AC002511.1	CPEB1	NA	LECT1	NKX2-8
GJD2	AC003110.1	CPLX3	NA	LMO7	NOVA1
GLDN	AC004152.1	CRABP1	NA	MAB21L1	NPAS3
GOLGA8B	AC004558.3	CTSH	NA	MCF2L	NRL
GRAMD2	AC004659.1	CYP1A1	NA	MLNR	NRXN3
GREM1	AC005392.2	DISP2	NA	MYO16	OR5AU1
GRINL1A	AC005392.8	DLL4	NA	NBEA	OR6S1
HCN4	AC005512.1	DUOX1	NA	NDFIP2	OTX2
HISPPD2A	AC005524.1	DUOX2	NA	NUPL1	PAPLN
HOMER2	AC005551.1	DUOXA1	NA	OXGR1	PAX9
IDH2	AC005626.1	DUOXA2	NA	PABPC3	PCNX
IMP3	AC007785.1	FAM148B	NA	PCDH17	PLEKHC1
ISL2	AC007842.1	FAM169B	NA	PCDH20	PLEKHG3
ISLR2	AC008440.9	FANCI	NA	PCDH8	PLEKHH1
ITGA11	AC008687.5	FOXB1	NA	PDX1	PPP1R13B
ITPKA	AC008737.11	GABRA5	NA	POU4F1	PRIMA1
KIAA1024	AC008738.7	GABRB3	NA	PRHOXNB	PRKCH
KIAA1199	AC008746.10	GATM	NA	PROZ	PRKD1
KLF13	AC008747.5	GJD2	NA	RAB20	PTGDR
LBXCOR1	AC008984.4	HCN4	NA	RASL11A	PTGER2
LRRK1	AC008984.6	ISL2	NA	RP11-122A8.3	PTPN21
LTK	AC008984.7	ISLR2	NA	RP11-124N19.2	RAB15
LYSMD2	AC010319.10	KIAA1024	NA	RP11-153M24.1	RDH12
LYSMD4	AC010325.7	LASS3	NA	RP11-165I9.7	RGS6
MAGEL2	AC010327.8	LBXCOR1	NA	RP11-173P16.2	RIPK3
MAN2A2	AC010330.7	LINGO1	NA	RP11-206I15.2	RTN1
MAP1A	AC010332.7	LTK	NA	RP11-24H2.1	SALL2
MEGF11	AC010458.6	MEGF11	NA	RP11-264J4.4	SAMD4A
MEIS2	AC010492.9	MYO5C	NA	RP11-305D15.6	SIX1
MESDC1	AC010503.8	NTRK3	NA	RP11-307N16.2	SIX4
MESP1	AC010518.3	ONECUT1	NA	RP11-31H2.2	SIX6
MESP2	AC010616.5	OTUD7A	NA	RP11-363G2.2	SLC10A1
MYO5A	AC010624.8	PAK6	NA	RP11-380N8.1	SLC22A17
NEDD4	AC011443.6	PCSK6	NA	RP11-385E5.2	SLC24A4
NEIL1	AC011452.6	PLA2G4D	NA	RP11-385E5.8	SLC7A8
NIPA1	AC011483.7	PLA2G4E	NA	RP11-421P11.7	SMOC1
NMB	AC011484.7	PLCB2	NA	RP11-534K14.1	SNORD112
NR2F2	AC011487.5	POLG	NA	RP11-534K14.2	SPG3A
NTRK3	AC011492.8	PPP1R14D	NA	RP11-756A22.5	SSTR1
OCA2	AC011500.7	PUNC	NA	RP11-76K19.1	STXBP6
ONECUT1	AC012314.8	RASGRF1	NA	RP11-76K19.4	SYNE2
PAQR5	AC018755.3	RGMA	NA	RP11-98F14.4	TC2N
PARP16	AC018758.2	RHCG	NA	RXFP2	TCL1A
PCSK6	AC020910.7	RHOV	NA	SLC15A1	THSD3
PDE8A	AC020922.9	RLBP1	NA	SLITRK1	TITF1
PKM2	AC020931.6	RORA	NA	SMAD9	TMED8
PRTG	AC020954.8	RYR3	NA	SOX1	TMEM121
PUNC	AC022098.9	SCG3	NA	SOX21	TMEM179
PYGO1	AC027307.5	SEMA6D	NA	THSD1	TMEM30B
RASGRF1	AC063977.6	SNRPN	NA	TMEM46	TMEM90A
RASGRP1	AC093078.3	SNURF	NA	TNFRSF19	TNFAIP2
RGMA	AC135592.2	SNX22	NA	TNFSF11	TRIM9
RHCG	AC138472.4	SPATA5L1	NA	TRPC4	TTC9
RPP25	ACSBG2	SPINT1	NA	UTP14C	VASH1
RYR3	ANKRD24	ST8SIA2	NA	VGCNL1	VSX2
SCAND2	AP1M2	SV2B	NA	WASF3	ZC3H14
SEMA6D	APC2	TGM5	NA	ZIC2	AC009292.11
SEMA7A	APLP1	TGM7	NA	ZIC5	AC012377.5
SH3PX3	APOC1	TMC3	NA	AB019438.1	AC012476.8
SHC4	APOE	TMEM202	NA	AB019439.1	AC013489.17
SLC27A2	ATCAY	WASH1	NA	AB019440.1	AC018926.10
SLC30A4	ATG4D	ABAT	NA	AC006360.2	AC023300.19
SLCO3A1	ATP1A3	AC002519.1	NA	AC007375.6	AC026583.10
SMAD3	ATP4A	AC003003.1	NA	ADCY4	AC027228.16
SMAD6	B3GNT3	AC005361.5	NA	AE000658.1	AC055876.1
SNX22	BEST2	AC007224.5	NA	AE000660.1	AC066616.7
SQRDL	BRUNOL5	AC009019.10	NA	AHNAK2	AC068446.22
ST8SIA2	BST2	AC009041.10	NA	AK7	AC069082.9
SV2B	C19orf2	AC009061.10	NA	AL049775.2	AC079328.11
TLE3	C19orf51	AC009078.6	NA	AL049831.2	AC087482.9
TM6SF1	C19orf59	AC009084.9	NA	AL049836.3	AC087641.5
TMEM62	CABP5	AC009086.6	NA	AL049874.3	AC090510.4
TMOD2	CACNA1A	AC009107.11	NA	AL079303.3	AC091117.5
TP53BP1	CACNG6	AC009113.8	NA	AL079307.7	AC103965.5
USP3	CACNG7	AC009117.8	NA	AL117190.6	AC103975.9
WDR72	CACNG8	AC009118.11	NA	AL132800.4	AC105129.4
WDR73	CADM4	AC009121.8	NA	AL132986.4	AC111152.2
ZSCAN2	CCDC8	AC009133.7	NA	AL133368.6	AC133637.2
ABAT	CCL25	AC010551.3	NA	AL133373.5	AC138649.1
ABCA3	CEACAM1	AC010650.9	NA	AL133445.4	ACAN
ABCC6	CEACAM20	AC012183.9	NA	AL135998.6	ACTC1
AC007601.7	CEACAM21	AC012325.9	NA	AL136001.6	ADAMTS17
AC008740.7	CEACAM3	AC018695.6	NA	AL137226.3	ADAMTS7
AC009019.10	CEACAM6	AC025284.4	NA	AL138479.3	ADAMTSL3
AC009061.10	CEACAM7	AC026461.11	NA	AL161668.6	ALDH1A2
AC009084.9	CEACAM8	AC027281.10	NA	AL161757.4	ALDH1A3
AC009113.8	CEACAMP2	AC040170.9	NA	AL162511.5	ANKDD1A
AC010542.7	CEACAMP5	AC087190.5	NA	AL162832.6	ARNT2
AC020763.6	CEBPA	AC092128.3	NA	AL163760.4	ATP10A
AC025284.4	CHST8	AC092142.5	NA	AL352979.4	BNC1
AC026461.11	CILP2	AC092327.4	NA	AL357153.4	BRUNOL6
AC040170.9	CLEC4G	AC092384.5	NA	AL390816.4	C15orf27
AC074143.5	CLEC4GP1	AC092724.2	NA	AL590326.3	C15orf56
AC092375.4	CLEC4M	AC092725.3	NA	AL928654.1	C15orf59
AC092376.3	CNOT3	AC093512.2	NA	AMN	CA12
AC092384.5	COMP	AC093520.4	NA	BCL11B	CD276
AC093249.4	COX6B2	AC099314.3	NA	BDKRB1	CGNL1
AC093520.4	CPAMD8	AC099524.5	NA	BDKRB2	CHRNA3
AC099518.3	CRB3	AC108134.3	NA	BEGAIN	CHRNA7
AC106788.3	CRLF1	AC109460.3	NA	BMP4	CORO2B
AC108134.3	CRX	AC116348.3	NA	BX927359.1	CPLX3
AC120498.2	CXCL17	AC120498.2	NA	C14orf105	CRABP1
AC130454.2	CYP2A13	AC130454.2	NA	C14orf118	CSPG4
AC133555.3	CYP2F1	AC132186.3	NA	C14orf180	CYP11A1
AC135048.2	CYP2S1	AC133919.3	NA	C14orf23	CYP19A1
AC136443.3	CYP4F22	AC134312.3	NA	C14orf29	CYP1A1
AC136619.3	DENND1C	ACSF3	NA	C14orf37	DIS3L
AC136932.4	DLL3	ACSM3	NA	C14orf39	DLL4
ADAMTS18	EBI3	ADAD2	NA	C14orf50	DMN
ADCY9	EFNA2	ADAMTS18	NA	C14orf65	DMXL2
AGRP	ELAVL3	AJ003147.1	NA	C14orf70	DUOX1
AJ003147.1	ELSPBP1	AL023882.4	NA	C14orf73	DUOX2
AL023882.4	EMR1	AL031705.1	NA	C14orf80	DUOXA1
ARHGDIG	FAM148C	ANKS4B	NA	CDC42BPB	DUOXA2
ATBF1	FBN3	AQP8	NA	CHGA	FAM108C1
ATP2C2	FCER2	ASPHD1	NA	CKB	FAM148A
BAIAP3	FFAR1	ATP2C2	NA	CLEC14A	FAM148B
BCL7C	FFAR2	BAIAP3	NA	CNIH	FAM174B
C16orf44	FGF21	BCMO1	NA	COCH	FAM81A
C16orf5	FOSB	C16orf54	NA	COX16	FOXB1
C16orf7	FOXA3	C16orf65	NA	CRIP1	FRMD5
C16orf73	FSD1	C16orf73	NA	CRIP2	GABRA5
C16orf74	FUT1	C16orf89	NA	CYP46A1	GABRB3
CA7	GALP	CA7	NA	DAAM1	GABRG3
CACNG3	GPR32	CACNA1H	NA	DEGS2	GATM
CALB2	GRIK5	CALB2	NA	DIO3	GCNT3
CARD15	GRIN2D	CARD15	NA	DLK1	GJD2
CASKIN1	HAPLN4	CASKIN1	NA	DPF3	GLDN
CBFA2T3	HIF3A	CBFA2T3	NA	DYNC1H1	GNB5
CBLN1	ICAM1	CBLN1	NA	EFS	GPR176
CCDC78	ICAM4	CCDC135	NA	EML1	GRAMD2
CDH11	ICAM5	CCDC64B	NA	EML5	GREM1
CDH16	IGFL1	CCL17	NA	ESRRB	HAPLN3
CDH3	IGFL3	CCL22	NA	EVL	HCN4
CDH8	IGFL4	CDH1	NA	FBLN5	IGF1R
CDYL2	IL12RB1	CDH15	NA	FLRT2	ISL2
CES2	IL28A	CDH3	NA	FOXA1	ISLR2
CIITA	ITGB1BP3	CDH8	NA	FOXG1	ITGA11
CKLF	IZUMO1	CES1	NA	GALNTL1	ITPKA
CMTM2	KANK3	CES3	NA	GPR68	KIAA1024
COTL1	KCNA7	CES7	NA	GSC	KIAA1199
COX6A2	KCNC3	CHST5	NA	HHIPL1	KLHL25
CPNE2	KCNN1	CIITA	NA	HSPA2	LARP6
CPNE7	KCTD15	CLDN9	NA	IGHV3-29	LBXCOR1
CRAMP1L	KDELR1	CNGB1	NA	IGHV3-36	LINGO1
CRISPLD2	KIAA1543	COX6A2	NA	IGHV3-37	LOXL1
CRYM	KIRREL2	CSNK2A2	NA	IGHV3-50	LRRK1
CTF1	KLC3	CX3CL1	NA	IGHV3-52	LTK
DEF8	KLK1	DNAH3	NA	IGHV3-54	MAGEL2
DNAH3	KLK10	DOC2A	NA	IGHV3-57	MAP1A
DNASE1L2	KLK11	DPEP3	NA	IGHV3-6	MEGF11
DOC2A	KLK13	EFCBP2	NA	IGHV3-62	MEIS2
DOK4	KLK14	ERAF	NA	IGHV4-55	MESDC1
DYNLRB2	KLK2	ERN2	NA	IGHV7-34-1	MYO1E
ERAF	KLK3	FA2H	NA	IGHV7-56	MYO5A
ERN2	KLK4	FAM57B	NA	IGHVII-15-1	MYO5C
EXOC3L	KLK9	FBXL16	NA	IGHVII-28-1	NEO1
FA2H	KRTDAP	FOXF1	NA	IGHVII-46-1	NR2F2
FAM65A	LEUTX	FTSJD1	NA	IGHVII-49-1	NTRK3
FAM96B	LILRA4	GFER	NA	IGHVII-51-2	OCA2
FBRS	LILRA5	GINS2	NA	IGHVII-53-1	ONECUT1
FBXL16	LILRA6	GNAO1	NA	IGHVII-62-1	PAQR5
FBXL8	LILRB1	GNG13	NA	IGHVIII-11-1	PCSK6
FHOD1	LILRB2	GPR114	NA	IGHVIII-47-1	PDE8A
FLYWCH1	LILRB5	GPR139	NA	IGHVIII-51-1	PLA2G4E
FOXC2	LMTK3	GPR97	NA	INSM2	PRTG
FOXF1	LRRC4B	GPRC5B	NA	JAG2	PUNC
FOXL1	LSR	GPT2	NA	JPH4	PYGO1
GFER	LTBP4	GRIN2A	NA	JUB	RAB27A
GLIS2	LYPD4	GSG1L	NA	KCNH5	RASGRF1
GNG13	LYPD5	HBM	NA	KCNK10	RASGRP1
GPR139	MAG	HS3ST4	NA	KCNK13	RASL12
GRIN2A	MAST1	HS3ST6	NA	KIAA1622	RBPMS2
GSG1L	MATK	HSD11B2	NA	LGALS3	RGMA
HAGHL	MEGF8	HSDL1	NA	LGMN	RHCG
HBA1	MEIS3	HYDIN	NA	LRFN5	RORA
HBA2	MUM1	IL17C	NA	LTBP2	RPP25
HBM	MYADM	IRF8	NA	MAMDC1	SCAMP5
HBQ1	MYBPC2	ITGAD	NA	MAP3K9	SCAPER
HBZ	MYH14	ITGAL	NA	MBIP	SCG3
HMOX2	MYO1F	ITGAM	NA	MED6	SEMA6D
HS3ST2	NANOS2	ITGAX	NA	MEG3	SH3GL3
HS3ST4	NCAN	JPH3	NA	MMP14	SHC4
HS3ST6	NOVA2	KCNG4	NA	MNAT1	SLC30A4
HSD11B2	NPHS1	KREMEN2	NA	MYH7	SLCO3A1
HSDL1	NTF4	LA16c-358B7.2	NA	NFATC4	SMAD3
HSF4	OLFM2	LRRC50	NA	NGB	SMAD6
IFT140	ONECUT3	MARVELD3	NA	NID2	SPINT1
IRF8	OR1I1	MMP25	NA	NKX2-8	ST8SIA2
IRX3	OR7A10	MPHOSPH6	NA	NOVA1	STARD9
IRX5	PDE4A	MT1B	NA	NPAS3	SV2B
IRX6	PDE4C	MT1DP	NA	NRXN3	TBC1D21
KIFC3	PEPD	MT1G	NA	NUDT14	TJP1
KREMEN2	PGLYRP2	MT1H	NA	OTX2	TMED3
LA16c-358B7.2	PNMAL2	MT1X	NA	PACS2	TMOD2
LITAF	POU2F2	MT3	NA	PAPLN	TPM1
LRRC50	PPFIA3	MYH11	NA	PAX9	UACA
METRN	PPP5C	NDRG4	NA	PLEK2	ABCA3
MLKL	PRKCG	NKD1	NA	PLEKHC1	AC007339.8
MMP2	PTH2	NOXO1	NA	PLEKHG3	AC007599.6
MMP25	PTPRS	OR1F2P	NA	PLEKHH1	AC009019.10
MPHOSPH6	RETN	OR2C1	NA	PPP1R13B	AC009061.10
MT1A	RGL3	OTOA	NA	PPP2R5C	AC009078.6
MT1B	RPS19	PAQR4	NA	PRIMA1	AC009113.8
MT1DP	RTBDN	PKD1L3	NA	PRKD1	AC009118.11
MT1E	RYR1	PLCG2	NA	PTGDR	AC010650.9
MT1F	SH2D3A	PLLP	NA	PTPN21	AC018695.6
MT1G	SHC2	PRKCB1	NA	REM2	AC025280.5
MT1H	SHD	PRM1	NA	RTN1	AC025283.6
MT1M	SIGLEC11	PRSS21	NA	SALL2	AC025284.4
MT1X	SIGLEC14	PRSS22	NA	SAMD4A	AC025287.8
MT2A	SIGLEC5	PRSS33	NA	SERPINA10	AC025810.5
MT3	SIGLEC6	PRSS36	NA	SERPINA11	AC026461.11
MTHFSD	SIGLEC8	PYCARD	NA	SERPINA5	AC027281.10
MYH11	SIGLEC9	PYDC1	NA	SIX1	AC040169.7
NDRG4	SIGLECP3	RBL2	NA	SIX4	AC040173.5
NETO2	SLC17A7	RLTPR	NA	SIX6	AC092142.5
NKD1	SLC1A6	SBK1	NA	SLC24A4	AC092327.4
NLRC5	SLC25A41	SCNN1B	NA	SLC25A21	AC093512.2
NMRAL1	SLC39A3	SCNN1G	NA	SLC7A7	AC093520.4
NOL3	SLC5A5	SEC14L5	NA	SMOC1	AC108134.3
NOXO1	SLC7A10	SEZ6L2	NA	SSTR1	AC120498.2
NPW	SLC7A9	SLC6A2	NA	STXBP6	AC130454.2
NTN2L	SLC8A2	SMPD3	NA	SYNE2	AC136932.4
PAQR4	SULT2A1	SNAI3	NA	SYT16	ADAMTS18
PDIA2	SULT2B1	SNX20	NA	TBPL2	AJ003147.1
PLCG2	SUV420H2	SOX8	NA	TCL1A	ASPHD1
PLLP	SYCN	SPN	NA	THSD3	ATBF1
PRKCB1	SYMPK	SRL	NA	TITF1	ATP2C2
PRSS36	SYT3	SSTR5	NA	TMEM121	BAIAP3
PYDC1	SYT5	STX1B2	NA	TMEM179	C16orf45
RAB11FIP3	TEX101	SYNGR3	NA	TMEM30B	C16orf73
RAB40C	THEG	SYT7	NA	TMEM90A	C16orf74
RGS11	TJP3	TAT	NA	TRAF3	CA7
RRAD	TLE2	TEKT5	NA	TTC9	CACNA1H
SALL1	TM6SF2	TMC5	NA	VASH1	CACNG3
SCNN1B	TMEM145	TNP2	NA	VSX2	CALB2
SCNN1G	TMEM162	TOX3	NA	WDR21A	CASKIN1
SLC5A2	TMEM59L	TPSB2	NA	ZC3H14	CBLN1
SLC6A2	TMIGD2	TRIM72	NA	ZNF219	CCDC102A
SLC7A5	TNFSF14	WDR24	NA	A26B1	CCDC64B
SLC9A3R2	TNNT1	Z84721.1	NA	AC009292.11	CDH11
SLC9A5	TRIM28	Z84721.4	NA	AC012377.5	CDH3
SMPD3	TSPAN16	ZP2	NA	AC013489.17	CDH8
SNAI3	TTC9B	ZSCAN10	NA	AC015723.8	CHST4
SOX8	TTYH1	AANAT	NA	AC016251.9	CHST6
SRCAP	TUBB4	AATF	NA	AC018515.7	CIITA
SSTR5	UPK1A	ABR	NA	AC022613.13	CMTM2
SULT1A1	VAV1	AC003043.1	NA	AC023300.19	CMTM3
SULT1A2	VSTM2B	AC003101.1	NA	AC025580.8	CMTM4
SULT1A3	ZFR2	AC003662.3	NA	AC055873.8	COTL1
SULT1A4	ZNF132	AC004147.2	NA	AC055876.1	CPNE2
SYNGR3	ZNF175	AC004687.1	NA	AC066611.6	CRISPLD2
SYT7	ZNF541	AC004706.4	NA	AC068338.14	CRYM
TAOK2	ZNF574	AC004797.1	NA	AC068446.22	DBNDD1
TBC1D24	ZNF792	AC005332.1	NA	AC068724.7	DNASE1L2
TBL3	AC006011.2	AC005544.1	NA	AC068870.17	DOC2A
TGFB1I1	AC007277.2	AC005562.1	NA	AC069029.9	EFCBP2
TK2	AC007383.4	AC005691.1	NA	AC069082.9	ERN2
TMEM159	AC007386.3	AC005696.1	NA	AC079328.11	FA2H
TOX3	AC007395.3	AC005697.1	NA	AC079969.5	FAM18A
TPPP3	AC007405.6	AC005730.1	NA	AC087477.8	FAM57B
TPSB2	AC009408.4	AC005837.1	NA	AC090516.2	FBXL16
TPSD1	AC009414.1	AC005883.14	NA	AC090527.3	FBXL8
TPSG1	AC009958.3	AC006050.3	NA	AC090602.16	FOXC2
TRADD	AC010145.10	AC006534.10	NA	AC092079.2	FOXF1
TRIM72	AC010731.3	AC007431.1	NA	AC092701.2	FOXL1
VAC14	AC010733.7	AC008158.16	NA	AC092754.4	FTS
WWOX	AC010904.13	AC009451.21	NA	AC102941.9	GFER
XYLT1	AC011245.13	AC009720.19	NA	AC103965.5	GLIS2
Z84721.1	AC011298.2	AC015674.12	NA	AC103988.7	GNAO1
Z84721.4	AC011298.7	AC015804.14	NA	AC104943.8	GPR139
Z97652.9	AC011994.10	AC015815.14	NA	AC105129.4	GPRC5B
Z98883.5	AC012063.7	AC015818.2	NA	AC107977.13	GRIN2A
ZFPM1	AC012305.7	AC015845.8	NA	AC108861.4	GSG1L
ZNF276	AC012493.9	AC015917.30	NA	AC111152.2	HAS3
AATF	AC012498.10	AC021534.1	NA	AC112693.5	HS3ST2
ABCA5	AC012671.7	AC021593.15	NA	AC133637.2	HS3ST4
ABCC3	AC013267.4	AC022596.4	NA	AC138649.1	HS3ST6
ABR	AC013275.8	AC022596.9	NA	ACAN	HSD11B2
AC002094.1	AC013403.13	AC024610.6	NA	ACTC1	HSF4
AC003101.1	AC013469.8	AC025627.7	NA	ADAMTS17	HYDIN
AC004477.1	AC015977.5	AC027045.21	NA	ADAMTS7	IL17C
AC004706.4	AC015980.4	AC036222.23	NA	ADAMTSL3	IRF8
AC004771.1	AC016670.7	AC053481.13	NA	ALDH1A2	IRX3
AC005332.1	AC016764.8	AC055863.16	NA	ALDH1A3	IRX5
AC005691.1	AC016907.6	AC061975.6	NA	ALPK3	IRX6
AC005702.1	AC017074.9	AC068531.9	NA	APBA2	JPH3
AC005829.1	AC018470.11	AC073621.1	NA	ARNT2	KCNG4
AC009720.19	AC018470.2	AC073621.20	NA	BAHD1	KREMEN2
AC015804.14	AC018892.8	AC073621.3	NA	BNC1	LA16c-358B7.2
AC015911.8	AC021188.6	AC079199.2	NA	C15orf20	LITAF
AC025627.7	AC023137.5	AC087499.5	NA	C15orf27	MAF
AC032044.28	AC027612.6	AC087499.6	NA	C15orf48	MARVELD3
AC055839.9	AC053503.2	AC087645.19	NA	C15orf56	MMP15
AC073624.1	AC068134.5	AC087749.12	NA	C15orf59	MMP2
AC080112.15	AC068288.6	AC090286.16	NA	C15orf60	MMP25
AC087491.2	AC069404.5	AC090610.6	NA	CA12	MPHOSPH6
AC087645.19	AC073869.5	AC090844.7	NA	CD276	MT1A
AC090610.6	AC074008.5	AC097370.10	NA	CGNL1	MT1B
AC090617.16	AC079135.6	AC100793.8	NA	CHRNA3	MT1DP
AC091132.16	AC079250.1	AC103702.3	NA	CHRNA7	MT1E
AC097370.10	AC079395.6	AC104996.4	NA	CHRNB4	MT1F
AC100793.8	AC079776.5	AC105024.8	NA	CORO2B	MT1G
AC103702.3	AC079811.6	AC105337.7	NA	CPEB1	MT1H
AC104564.11	AC092641.2	AC108004.3	NA	CPLX3	MT1M
AC104581.22	AC092662.2	AC109319.17	NA	CRABP1	MT1X
AC108004.3	AC092687.3	AC109327.10	NA	CSPG4	MT3
AC109319.17	AC092845.6	AC115090.8	NA	CTSH	MTHFSD
AC113554.9	AC093390.4	AC118754.6	NA	CYP19A1	MYH11
AC115090.8	AC096579.1	AC120057.9	NA	CYP1A1	NDRG4
AC122129.9	AC096767.2	AC127029.12	NA	DLL4	NETO2
AC126544.5	AC097468.3	AC127496.5	NA	DMN	NKD1
AC127496.5	AC097483.3	AC129492.6	NA	DUOX1	NOXO1
AC129492.6	AC104654.3	AC132872.17	NA	DUOX2	OR1F1
AC129916.1	AC104794.4	AC132938.1	NA	DUOXA1	PAQR4
AC135178.13	AC104801.4	AC138710.5	NA	DUOXA2	PKD1L2
ACCN1	AC109826.4	AC144838.2	NA	FAM148A	PLCG2
ACE	AC109827.4	ACCN1	NA	FAM148B	PLLP
ADAM11	AC110080.2	ADAM11	NA	FAM81A	PPL
ADORA2B	AC110754.3	AIPL1	NA	FMN1	PRSS33
ALOX12	AC110754.4	AL353997.1	NA	FOXB1	PYDC1
ALOX15	AC112786.4	ALOX12B	NA	FRMD5	SALL1
ALOXE3	AC114803.5	ALOX12P2	NA	GABRA5	SBK1
ARHGAP27	AC114812.10	ALOX15	NA	GABRB3	SCNN1B
ARHGEF15	AC116654.4	ALOXE3	NA	GABRG3	SCNN1G
ARL5C	AC144525.3	APOH	NA	GCNT3	SEZ6L2
ASGR1	ACADL	ARHGEF15	NA	GJD2	SLC6A2
ATP2A3	ACCN4	ARL5C	NA	GLDN	SLC9A3R2
B4GALNT2	ACOXL	ASGR2	NA	GOLGA8B	SMPD3
BAHCC1	ADD2	ATP1B2	NA	GPR176	SNAI3
C17orf28	AFF3	ATP2A3	NA	GRAMD2	SOX8
C17orf54	AGXT	BTBD17	NA	GREM1	STX1B2
C17orf58	ALMS1	BZRAP1	NA	GRINL1A	SYNGR3
C17orf59	ALPI	C17orf28	NA	HAPLN3	SYT7
C17orf67	ALPP	C17orf46	NA	HCN4	TAT
C17orf82	ALPPL2	C17orf47	NA	IGF1R	TMC5
C17orf92	AQP12B	C17orf55	NA	ISL2	TMC7
C1QL1	ARHGEF4	C17orf76	NA	ISLR2	TOX3
C1QTNF1	ASPRV1	C17orf77	NA	ITGA11	TPPP3
CA10	ATP6V1C2	C17orf92	NA	ITPKA	TRADD
CA4	BCL11A	C1QL1	NA	KIAA1024	TRIM72
CACNA1G	C1QL2	CA10	NA	KIAA1199	WDR24
CACNG4	C2orf40	CA4	NA	KLHL25	WFDC1
CAMTA2	C2orf55	CACNA1G	NA	LARP6	XYLT1
CANT1	C2orf70	CACNG1	NA	LASS3	Z98883.5
CBX4	C2orf77	CACNG4	NA	LBXCOR1	ZNF423
CBX8	CACNB4	CACNG5	NA	LINGO1	AATF
CCDC56	CCDC108	CARD14	NA	LTK	ABCC3
CCDC57	CCDC140	CBX2	NA	MAGEL2	AC002094.1
CCR10	CD207	CBX4	NA	MAN2A2	AC003101.1
CD300A	CD302	CBX8	NA	MAPK6	AC003688.1
CD300E	CD8A	CCDC55	NA	MEF2A	AC004448.3
CENTA2	CDCA7	CCL1	NA	MEGF11	AC004477.1
CHAD	CDK5R2	CCL14	NA	MEIS2	AC004706.4
CNTD1	CHRND	CCL15	NA	MESP2	AC005277.1
CNTNAP1	CHRNG	CCL16	NA	MKRN3	AC005332.1
CNTROB	CIB4	CCL23	NA	NEIL1	AC005411.1
COL1A1	CLEC4F	CCL4	NA	NEO1	AC005691.1
COPZ2	CNTNAP5	CD300E	NA	NR2F2	AC005696.1
CORO6	COLEC11	CD300LD	NA	NTRK3	AC005837.1
CPD	CREG2	CD300LF	NA	OCA2	AC005972.1
CRHR1	CRYBA2	CD7	NA	ONECUT1	AC006070.6
CUEDC1	CTLA4	CD79B	NA	OR4F15	AC006070.7
CXCL16	CXCR4	CENTA2	NA	OR4N4	AC009451.21
CYB5D1	CYP26B1	CENTB1	NA	PAQR5	AC009720.19
CYGB	CYS1	CHRNB1	NA	PCSK6	AC015674.12
DGKE	DNAH6	CLEC10A	NA	PDE8A	AC015804.14
DHX40	DPYSL5	CRHR1	NA	PRTG	AC015845.8
DLX3	ECEL1	CSF3	NA	PUNC	AC019349.4
DLX4	EDAR	CSH1	NA	PYGO1	AC025627.7
DNAI2	EGR4	CSH2	NA	RASGRF1	AC032044.28
DPH1	EMX1	CSHL1	NA	RASL12	AC055813.9
DUSP3	EN1	DHRS7C	NA	RBPMS2	AC055839.9
ETV4	EVX2	DLX3	NA	RGMA	AC061975.6
EZH1	FABP1	DLX4	NA	RHCG	AC068531.9
FADS6	FAHD2B	DNAH17	NA	RORA	AC073621.20
FAM20A	FAM49A	DNAH2	NA	RPP25	AC073624.1
FBXO39	FAM59B	DNAI2	NA	RYR3	AC087498.8
FGF11	FASTKD2	DYNLL2	NA	SCG3	AC087645.19
FMNL1	FBXO41	EFCAB3	NA	SCG5	AC087650.12
FOXJ1	FEV	EFNB3	NA	SEMA6D	AC090610.6
FSCN2	FIGLA	ELAC2	NA	SH3GL3	AC090617.16
FZD2	GAD1	EPN3	NA	SHC4	AC090774.3
GALR2	GALNT14	EPX	NA	SLC12A1	AC091132.16
GAS7	GBX2	FADS6	NA	SMAD6	AC091133.11
GAST	GDF7	FAM117A	NA	SNRPN	AC098850.1
GFAP	GPR113	FBXO39	NA	SNURF	AC100793.8
GLTPD2	GPR55	FMNL1	NA	SNX22	AC103702.3
GPR142	GRHL1	FOXJ1	NA	ST8SIA2	AC104564.11
GPR172B	HOXD1	FSCN2	NA	SV2B	AC108004.3
GPRC5C	HOXD10	GALR2	NA	THSD4	AC109319.17
GRIN2C	HOXD11	GARNL4	NA	TJP1	AC115090.8
GUCY2D	HOXD12	GAS2L2	NA	TMEM202	AC118754.6
HAP1	HOXD13	GAST	NA	TNFAIP8L3	AC127496.5
HCRT	HOXD9	GH1	NA	TPM1	AC129916.1
HES7	IGKV2-36	GH2	NA	TYRO3	AC131055.10
HIC1	IGKV2-38	GLP2R	NA	UACA	AC132872.17
HLF	IGKV2-4	GLTPD2	NA	VPS13C	AC138207.3
HNF1B	IGKV4-1	GPR142	NA	VSIG6	AC138710.5
HOXB1	IHH	GPR179	NA	WDR72	ACCN1
HOXB13	IL1F10	GPRC5C	NA	ZFAND6	ACTG1
HOXB2	IL1F6	GRB7	NA	ABCA3	ADAM11
HOXB3	IL1F7	GRIN2C	NA	AC002331.1	ALOX12B
HOXB4	IL1F8	GSDM1	NA	AC003003.1	ALOX15
HOXB5	IL1F9	GUCY2D	NA	AC007225.2	ALOXE3
HOXB6	IL1R2	HAP1	NA	AC007599.6	ARL5C
HOXB7	IL1RN	HLF	NA	AC007614.7	ASGR1
HOXB8	IL8RA	HNF1B	NA	AC009041.10	AXIN2
HOXB9	IL8RB	HOXB13	NA	AC009061.10	B4GALNT2
HS3ST3A1	IQCA1	HOXB7	NA	AC009078.6	BAHCC1
HS3ST3B1	ITGA6	HOXB8	NA	AC009107.11	BAIAP2
IKZF3	ITM2C	HOXB9	NA	AC009113.8	C17orf28
ITGA2B	KCNF1	ICAM2	NA	AC009118.11	C17orf69
ITGA3	KCNH7	IKZF3	NA	AC009131.6	C17orf76
ITGB3	KCNIP3	ITGA2B	NA	AC010650.9	C17orf82
ITGB4	KCNJ3	ITGB4	NA	AC012325.9	C17orf92
JMJD3	KCNK12	KCNH6	NA	AC018695.6	C1QL1
JUP	KCNK3	KRT25	NA	AC022167.7	C1QTNF1
KCNAB3	KCNS3	KRT26	NA	AC025280.5	CA10
KCNH4	KIAA1754L	KRT28	NA	AC025284.4	CA4
KCNH6	KIF1A	KRT9	NA	AC026461.11	CACNA1G
KCNJ12	KLHL23	LHX1	NA	AC027281.10	CACNG4
KCNJ2	LIMS2	LLGL2	NA	AC040169.7	CBX4
KIF1C	LONRF2	LPO	NA	AC040170.9	CBX8
KRT36	LRP2	LRRC37B2	NA	AC040173.5	CCDC40
KSR1	LRRTM1	MAPT	NA	AC074143.5	CCDC43
LHX1	MAL	MED31	NA	AC087190.5	CCL11
LPO	MAPRE3	MGAT5B	NA	AC092142.5	CCL2
LSMD1	MARCO	MPO	NA	AC092143.4	CD7
MAP2K3	MDH1B	MPP2	NA	AC092327.4	CDC27
MAPT	MERTK	NACA2	NA	AC092384.5	CDR2L
MED31	MYCN	NEUROD2	NA	AC093512.2	CENTA2
METRNL	MYEOV2	NGFR	NA	AC099314.3	CHRNB1
MGAT5B	MYT1L	NOTUM	NA	AC106819.3	CLDN7
MLLT6	NEUROD1	NPLOC4	NA	AC108134.3	CLEC10A
MMP28	NOTO	NPTX1	NA	AC120498.2	COL1A1
MPP3	NPPC	NTN1	NA	AC130454.2	COPZ2
MXRA7	NRXN1	ODF4	NA	AC131384.1	CORO6
MYOCD	NTSR2	OR3A1	NA	AC134312.3	CPD
[truncated: 5,668 more rows]
